# Supplementary material for: Genome sequencing of the staple food crop white Guinea yam enables the development of a molecular marker for sex determination
Source: BMC Biol. 2017 Sep 19;15:86. doi: 10.1186/s12915-017-0419-x (PMC5604175; doi:10.1186/s12915-017-0419-x)
Supplement: Supplementary file 3 — List of the 26,198 protein coding genes predicted in the D. rotundata genome. (XLSX 1480 kb) [file 12915_2017_419_MOESM3_ESM.xlsx]

## Sheet: Supplemental dataset S1
Additional file 3: Supplemental dataset S1. List of the 26,198 proein coding genes predicted in the D. rotundata genome
Gene_ID	Interproscan_IPR_Description	Blast2GO_GO_term	Blast2GO_EC_Number	Blast2GO_GO_Description	Interproscan_IPR	Interproscan_GO_term	Interproscan_EC_Number	Interproscan_Pathways
Dr00001
Dr00002	Glucose-methanol-choline oxidoreductase, N-terminal|Glucose-methanol-choline oxidoreductase, C-terminal|Alcohol dehydrogenase, long-chain fatty				IPR000172|IPR007867|IPR012400	GO:0016614|GO:0050660|GO:0055114|GO:0046577
Dr00003	SWIB/MDM2 domain|SWIB domain				IPR003121|IPR019835	GO:0005515
Dr00004	CBF1-interacting co-repressor CIR, N-terminal domain	GO:0008270|GO:0003676		putatative protein	IPR019339
Dr00005	Glycoside hydrolase, family 14|BZR1, transcriptional repressor|Glycoside hydrolase, superfamily|Glycoside hydrolase, catalytic domain	GO:0000272|GO:0016161|GO:0005982|GO:0005985	EC:3.2.1.2	beta-amylase	IPR001554|IPR008540|IPR017853|IPR013781	GO:0000272|GO:0016161|GO:0003824|GO:0005975	EC:3.2.1.2	KEGG: 00500+3.2.1.2|MetaCyc: PWY-6724|MetaCyc: PWY-842
Dr00006	FAR1 DNA binding domain|Zinc finger, SWIM-type|Zinc finger, PMZ-type	GO:0008270		far1-related protein	IPR004330|IPR007527|IPR006564	GO:0008270
Dr00007	Zinc finger, SWIM-type|Zinc finger, PMZ-type				IPR007527|IPR006564	GO:0008270
Dr00008
Dr00009		GO:0009987|GO:0044699|GO:0005975|GO:0009526|GO:0009507|GO:0016020		root cap 1
Dr00010	RNA polymerase sigma-70 region 3|RNA polymerase sigma-70 region 2|RNA polymerase sigma-70 region 4|RNA polymerase sigma-70|RNA polymerase sigma factor, region 3/4|RNA polymerase sigma factor, region 2|Winged helix-turn-helix DNA-binding domain|RNA polymerase sigma-70 like domain	GO:0003899|GO:0009416|GO:0006355|GO:0003677|GO:0003700|GO:0016987|GO:0006352|GO:0009507|GO:0005730|GO:0006144|GO:0006206|GO:0005667|GO:0045449	EC:2.7.7.6	rna polymerase sigma subunit 1	IPR007624|IPR007627|IPR007630|IPR013324|IPR013325|IPR011991|IPR000943|IPR014284	GO:0003677|GO:0003700|GO:0006352|GO:0006355|GO:0016987
Dr00011	GPI inositol-deacylase PGAP1-like	GO:0009987|GO:0005739|GO:0044446|GO:0009507		hydrolase-like protein	IPR012908	GO:0006505|GO:0006886|GO:0016788
Dr00012	Herpesvirus UL92|F-box domain	GO:0016023		f-box protein skip31	IPR004289|IPR001810	GO:0005515
Dr00013
Dr00014
Dr00015
Dr00016	FAR1 DNA binding domain|Zinc finger, SWIM-type|Zinc finger, PMZ-type	GO:0008270		transposon expressed	IPR004330|IPR007527|IPR006564	GO:0008270
Dr00017	Proliferating cell nuclear antigen, PCNA|Proliferating cell nuclear antigen, PCNA, N-terminal|Protein kinase, ATP binding site	GO:0042276|GO:0005730|GO:0030337|GO:0003677|GO:0043626|GO:0006275|GO:0005737|GO:0042575		proliferating cell nuclear antigen	IPR000730|IPR022648|IPR017441	GO:0003677|GO:0006275|GO:0030337|GO:0043626|GO:0005524
Dr00018
Dr00019	F-box domain|Kelch-type beta propeller				IPR001810|IPR015915	GO:0005515
Dr00020	Ankyrin repeat-containing domain|Ankyrin repeat	GO:0009553|GO:0005739|GO:0005634|GO:0009677		ankyrin repeat-containing protein	IPR020683|IPR002110	GO:0005515
Dr00021	DnaJ domain|Heat shock protein DnaJ, cysteine-rich domain|Chaperone DnaJ, C-terminal|HSP40/DnaJ peptide-binding|DnaJ domain, conserved site|Chaperone DnaJ	GO:0009561|GO:0048856|GO:0005739|GO:0006457|GO:0044767|GO:0030154|GO:0005515|GO:0043167|GO:0016043		chaperone protein dnaj mitochondrial-like	IPR001623|IPR001305|IPR002939|IPR008971|IPR018253|IPR012724	GO:0031072|GO:0051082|GO:0006457|GO:0005524|GO:0009408
Dr00022
Dr00023
Dr00024	Domain of unknown function DUF1995	GO:0009536		uncharacterized protein	IPR018962
Dr00025		GO:0071840|GO:0009987|GO:0009536|GO:0005739		plastid protein
Dr00026	UDP-glucuronosyl/UDP-glucosyltransferase	GO:0005488|GO:0035251		cis-zeatin o-glucosyltransferase	IPR002213	GO:0008152|GO:0016758
Dr00027	START domain|Domain of unknown function DUF1336|Pleckstrin homology-like domain|START-like domain|Pleckstrin homology domain	GO:0005543		enhanced disease resistance 2 protein	IPR002913|IPR009769|IPR011993|IPR023393|IPR001849	GO:0008289|GO:0005515|GO:0005543
Dr00028	Mob1/phocein	GO:0016301|GO:0016310|GO:0005634		mps one binder kinase activator-like 1a	IPR005301
Dr00029	Target SNARE coiled-coil domain	GO:0005802|GO:0016020|GO:0005484|GO:0016192|GO:0006886		syntaxin 33	IPR000727	GO:0005515
Dr00030	WRC|Glutamine-Leucine-Glutamine, QLQ				IPR014977|IPR014978	GO:0005515|GO:0005524|GO:0005634|GO:0006355|GO:0016818
Dr00031	Protein kinase domain|Protein kinase-like domain|Serine/threonine- / dual specificity protein kinase, catalytic domain|Protein kinase, ATP binding site|Serine/threonine-protein kinase, active site	GO:0004693|GO:0008353|GO:0007049|GO:0006468|GO:0005524|GO:0000074|GO:0009069	EC:2.7.11.22|EC:2.7.11.23	cyclin-dependent kinase f-4-like	IPR000719|IPR011009|IPR002290|IPR017441|IPR008271	GO:0004672|GO:0005524|GO:0006468|GO:0016772|GO:0004674
Dr00032		GO:0005739		protein
Dr00033	K homology domain, prokaryotic type|Ribosomal protein S3, C-terminal	GO:0044444|GO:0043229		40s ribosomal protein s3	IPR009019|IPR001351	GO:0003723|GO:0003735|GO:0005840|GO:0006412
Dr00034	Amino acid/polyamine transporter I	GO:0015203|GO:0003333|GO:0016023|GO:0005886|GO:0015171|GO:0015846|GO:0016021|GO:0015293|GO:0009536		amino acid permease family expressed	IPR002293	GO:0003333|GO:0015171|GO:0016020
Dr00035	Haem peroxidase, plant/fungal/bacterial|Plant peroxidase|Haem peroxidase|Peroxidase, active site	GO:0009628|GO:0006950|GO:0044464		peroxidase 3	IPR002016|IPR010255|IPR000823|IPR019794	GO:0004601|GO:0006979|GO:0020037|GO:0055114	EC:1.11.1.7	KEGG: 00360+1.11.1.7|KEGG: 00940+1.11.1.7|MetaCyc: PWY-5461|MetaCyc: PWY-7214
Dr00036	Pyridoxal phosphate-dependent decarboxylase|Aromatic-L-amino-acid decarboxylase|Pyridoxal phosphate-dependent transferase|Pyridoxal phosphate-dependent transferase, major region, subdomain 1|Pyridoxal phosphate-dependent transferase, major region, subdomain 2|Pyridoxal-phosphate binding site	GO:0016831	EC:4.1.1.0	tyrosine dopa decarboxylase	IPR002129|IPR015424|IPR015421|IPR015422|IPR010977|IPR021115	GO:0016831|GO:0019752|GO:0030170|GO:0003824|GO:0006520
Dr00037	Methyltransferase type 11	GO:0044763|GO:0016023|GO:0008757|GO:0006694|GO:0016020|GO:0007389		24-methylenesterol c-methyltransferase 2	IPR013216	GO:0008152|GO:0008168
Dr00038	WD40-repeat-containing domain	GO:0016023		uncharacterized membrane protein at1g75140-like	IPR017986	GO:0005515
Dr00039	Protein of unknown function DUF1218	GO:0016023|GO:0016020		uncharacterized protein	IPR009606
Dr00040	Shikimate kinase/Threonine synthase-like 1|P-loop containing nucleoside triphosphate hydrolase|Carbohydrate kinase, thermoresistant glucokinase	GO:0016310|GO:0004765|GO:0046316|GO:0005524|GO:0017111|GO:0009536|GO:0000162|GO:0006571|GO:0009094|GO:0006098	EC:2.7.1.71|EC:2.7.1.12|EC:3.6.1.15	protein	IPR000623|IPR027417|IPR006001	GO:0005975|GO:0016301	EC:2.7.1.71|EC:2.7.1.12	KEGG: 00400+2.7.1.71|MetaCyc: PWY-6163|UniPathway: UPA00053|KEGG: 00030+2.7.1.12|MetaCyc: PWY-5530|UniPathway: UPA00792
Dr00041	C-5 cytosine methyltransferase|DNA methylase, C-5 cytosine-specific, active site	GO:0006306|GO:0008168	EC:2.1.1.0	chromomethylase 2	IPR001525|IPR018117	GO:0003677|GO:0006306|GO:0008168	EC:2.1.1.37	KEGG: 00270+2.1.1.37
Dr00042	C-5 cytosine methyltransferase|Chromo domain|Chromo domain-like|Chromo domain/shadow|DNA methylase, C-5 cytosine-specific, active site|Chromo domain, conserved site	GO:0003886|GO:0003677|GO:0016746|GO:0005634|GO:0090116|GO:0006555	EC:2.1.1.37	dna (cytosine-5)-methyltransferase	IPR001525|IPR023780|IPR016197|IPR000953|IPR018117|IPR023779	GO:0003677|GO:0006306|GO:0008168	EC:2.1.1.37	KEGG: 00270+2.1.1.37
Dr00043	C-5 cytosine methyltransferase|Bromo adjacent homology (BAH) domain	GO:0006306|GO:0008168	EC:2.1.1.0	chromomethylase 2	IPR001525|IPR001025	GO:0003677|GO:0006306|GO:0008168	EC:2.1.1.37	KEGG: 00270+2.1.1.37
Dr00044	Nnf1				IPR007128
Dr00045	E3 ubiquitin-protein ligase SINA like|Seven-in-absentia protein, TRAF-like domain|TRAF-like	GO:0007275|GO:0016567|GO:0006511|GO:0004842|GO:0005634|GO:0008270|GO:0005739	EC:6.3.2.19	ubiquitin ligase	IPR004162|IPR018121|IPR008974	GO:0005634|GO:0006511|GO:0007275|GO:0005515	EC:6.3.2.-	KEGG: 00300+6.3.2.-|KEGG: 00380+6.3.2.-|UniPathway: UPA00143
Dr00046	Proteasome component (PCI) domain	GO:0000502		26s proteasome non-atpase regulatory subunit 13	IPR000717	GO:0005515
Dr00047	NmrA-like|NAD(P)-binding domain				IPR008030|IPR016040
Dr00048	Pentatricopeptide repeat|Tetratricopeptide-like helical	GO:0009536		pentatricopeptide repeat-containing protein	IPR002885|IPR011990	GO:0005515
Dr00049	Tubulin|Tubulin/FtsZ, GTPase domain	GO:0005874|GO:0051258|GO:0006184|GO:0007018|GO:0003924|GO:0005200|GO:0005737|GO:0005525		alpha-tubulin 2	IPR000217|IPR003008	GO:0005874|GO:0007017
Dr00050	SCAMP	GO:0005886|GO:0016021|GO:0031410|GO:0005739|GO:0015031		secretory carrier membrane	IPR007273	GO:0015031|GO:0016021
Dr00051	AMP-dependent synthetase/ligase|AMP-binding enzyme C-terminal domain|AMP-binding, conserved site	GO:0003824		4-coumarate ligase	IPR000873|IPR025110|IPR020845	GO:0003824|GO:0008152
Dr00052	Nonaspanin (TM9SF)	GO:0005840|GO:0009505|GO:0005794|GO:0003735|GO:0016023|GO:0016021|GO:0006412|GO:0042254		phagocytic receptor 1b-like	IPR004240	GO:0016021
Dr00053	Major facilitator superfamily domain, general substrate transporter	GO:0044444|GO:0043231		protein	IPR016196
Dr00054
Dr00055	Topless family|WD40 repeat|WD40-repeat-containing domain|WD40/YVTN repeat-like-containing domain|LisH dimerisation motif|CTLH, C-terminal LisH motif|WD40 repeat, conserved site	GO:0009725|GO:0007275|GO:0044424		wd repeat-containing	IPR027728|IPR001680|IPR017986|IPR015943|IPR006594|IPR006595|IPR019775	GO:0006355|GO:0005515
Dr00056	Pentatricopeptide repeat	GO:0005739		at1g07590-like protein	IPR002885
Dr00057	Guanine nucleotide binding protein (G-protein), alpha subunit|G protein alpha subunit, helical insertion|P-loop containing nucleoside triphosphate hydrolase	GO:0009750|GO:0009630|GO:0004871|GO:0009749|GO:0009744|GO:0005834|GO:2000067|GO:0005525|GO:0006184|GO:0009652|GO:0031683|GO:0001664|GO:0009737|GO:0007188|GO:0003924|GO:0005634|GO:0010555|GO:0009723		extra-large gtp-binding protein 3	IPR001019|IPR011025|IPR027417	GO:0003924|GO:0004871|GO:0007186|GO:0019001|GO:0031683|GO:0007165		Reactome: REACT_14797
Dr00058		GO:0004871|GO:0007186|GO:0044707|GO:0005525|GO:0006184|GO:0044424|GO:0031683|GO:0003924|GO:0009743		gtp-binding protein alpha
Dr00059	Peptidase C48, SUMO/Sentrin/Ubl1				IPR003653	GO:0006508|GO:0008234
Dr00060	Nucleoside phosphorylase|Nucleoside phosphorylase domain	GO:0016023|GO:0006139|GO:0016787		phosphorylase family protein	IPR018017|IPR000845	GO:0003824|GO:0009116
Dr00061	NAD(P)-binding domain	GO:0009507		uncharacterized protein chloroplastic-like	IPR016040
Dr00062	NAD(P)-binding domain	GO:0010287|GO:0009579|GO:0016853|GO:0000166|GO:0006979		uncharacterized protein chloroplastic-like	IPR016040
Dr00063	Peptidase C1A, papain|Peptidase C1A, papain C-terminal|Proteinase inhibitor I29, cathepsin propeptide|Cysteine peptidase, cysteine active site|Cysteine peptidase, histidine active site|Cysteine peptidase, asparagine active site	GO:0009817|GO:0007568|GO:0032440|GO:0010282|GO:0006508|GO:0009723|GO:0008234|GO:0055114	EC:1.3.1.74	protein	IPR013128|IPR000668|IPR013201|IPR000169|IPR025660|IPR025661	GO:0008234|GO:0006508
Dr00064	Peptidase C1A, papain|Peptidase C1A, papain C-terminal|Proteinase inhibitor I29, cathepsin propeptide|Cysteine peptidase, histidine active site|Cysteine peptidase, asparagine active site	GO:0008233|GO:0050896|GO:0016491|GO:0008152		protein	IPR013128|IPR000668|IPR013201|IPR025660|IPR025661	GO:0008234|GO:0006508
Dr00065	Glycoside hydrolase, family 16|Xyloglucan endo-transglycosylase, C-terminal|Concanavalin A-like lectin/glucanases superfamily|Concanavalin A-like lectin/glucanase, subgroup|Xyloglucan endotransglucosylase/hydrolase	GO:0004553|GO:0016762|GO:0016023|GO:0005618|GO:0006073|GO:0048046	EC:3.2.1.0|EC:2.4.1.207	probable xyloglucan endotransglucosylase hydrolase protein 30-like	IPR000757|IPR010713|IPR008985|IPR013320|IPR016455	GO:0004553|GO:0005975|GO:0005618|GO:0006073|GO:0016762|GO:0048046
Dr00066	Armadillo-type fold|WD40-repeat-containing domain|WD40/YVTN repeat-like-containing domain|WD40 repeat|LisH dimerisation motif	GO:0009793|GO:0048366|GO:0009908|GO:0005634|GO:0080008		ddb1- and cul4-associated factor homolog 1-like	IPR016024|IPR017986|IPR015943|IPR001680|IPR006594	GO:0005488|GO:0005515
Dr00067
Dr00068	CASTOR/POLLUX/SYM8 ion channels|NAD(P)-binding domain	GO:0042802|GO:0031965|GO:0034220|GO:0016021|GO:0044005|GO:0009536|GO:0000166		dmi1 protein	IPR010420|IPR016040
Dr00069	Protein kinase domain|Protein kinase-like domain|Serine/threonine- / dual specificity protein kinase, catalytic domain|Protein kinase, ATP binding site|Serine/threonine-protein kinase, active site	GO:0006468|GO:0004674|GO:0005524|GO:0006970|GO:0009069	EC:2.7.11.0	serine threonine protein kinase	IPR000719|IPR011009|IPR002290|IPR017441|IPR008271	GO:0004672|GO:0005524|GO:0006468|GO:0016772|GO:0004674
Dr00070	SANT/Myb domain|Crotonase superfamily|Homeodomain-like|Crontonase, C-terminal|Myb domain				IPR001005|IPR001753|IPR009057|IPR014748|IPR017930	GO:0003682|GO:0003824|GO:0008152|GO:0003677
Dr00071	Filament-like plant protein				IPR008587
Dr00072	YEATS	GO:0009536|GO:0005739		protein af-9 homolog	IPR005033	GO:0005634|GO:0006355
Dr00073	YEATS	GO:0009536|GO:0005739		protein af-9 homolog	IPR005033	GO:0005634|GO:0006355
Dr00074	Amidase|Amidase signature domain|Amidase, conserved site	GO:0003824		glutamyl-trna amidotransferase subunit a-like	IPR000120|IPR023631|IPR020556	GO:0016884	EC:6.3.5.-	KEGG: 00253+6.3.5.-
Dr00075	Streptomyces cyclase/dehydrase|START-like domain	GO:0009536		uncharacterized protein	IPR005031|IPR023393
Dr00076	Alpha-ketoglutarate-dependent dioxygenase AlkB-like|Oxoglutarate/iron-dependent dioxygenase				IPR027450|IPR005123	GO:0016491|GO:0016706|GO:0055114
Dr00077	Serine-threonine/tyrosine-protein kinase catalytic domain|Wall-associated receptor kinase galacturonan-binding domain|Protein kinase-like domain|Concanavalin A-like lectin/glucanase, subgroup|Serine/threonine- / dual specificity protein kinase, catalytic domain|Protein kinase domain|Protein kinase, ATP binding site|Serine/threonine-protein kinase, active site	GO:0006468|GO:0004674|GO:0005524|GO:0009069	EC:2.7.11.0	probable receptor-like protein kinase at1g67000-like	IPR001245|IPR025287|IPR011009|IPR013320|IPR002290|IPR000719|IPR017441|IPR008271	GO:0004672|GO:0006468|GO:0030247|GO:0016772|GO:0005524|GO:0004674
Dr00078	Protein of unknown function DUF639	GO:0005739		uncharacterized protein	IPR006927
Dr00079	PLC-like phosphodiesterase, TIM beta/alpha-barrel domain|Phospholipase C, phosphatidylinositol-specific , X domain	GO:0006629|GO:0008081|GO:0016023|GO:0006468|GO:0005524|GO:0004674|GO:0009069	EC:3.1.4.0|EC:2.7.11.0	pi-plc x domain-containing protein at5g67130-like	IPR017946|IPR000909	GO:0006629|GO:0008081
Dr00080	Protein kinase domain|Protein kinase-like domain|Serine/threonine- / dual specificity protein kinase, catalytic domain|Protein kinase, ATP binding site|Serine/threonine-protein kinase, active site	GO:0006468|GO:0004674|GO:0000166|GO:0000165|GO:0009069	EC:2.7.11.0	probable serine threonine-protein kinase at1g01540-like	IPR000719|IPR011009|IPR002290|IPR017441|IPR008271	GO:0004672|GO:0005524|GO:0006468|GO:0016772|GO:0004674
Dr00081	DNA-directed DNA polymerase, family B, multifunctional domain|DNA-directed DNA polymerase, family B, exonuclease domain|Zinc finger, DNA-directed DNA polymerase, family B, alpha|DNA-directed DNA polymerase, family B|Ribonuclease H-like domain|DNA polymerase, palm domain|DNA-directed DNA polymerase, family B, pol2|DNA-directed DNA polymerase, family B, conserved site	GO:0051536|GO:0003887|GO:0006303|GO:0003896|GO:0006297|GO:0003677|GO:0008408|GO:0006269|GO:0006270|GO:0019985|GO:0005658|GO:0006273|GO:0036094|GO:0042575|GO:0005730|GO:0006351	EC:2.7.7.7	dna polymerase alpha catalytic	IPR006134|IPR006133|IPR015088|IPR012337|IPR023211|IPR006172|IPR004578|IPR017964	GO:0000166|GO:0003677|GO:0003887|GO:0006260|GO:0001882|GO:0003676|GO:0006139	EC:2.7.7.7	KEGG: 00230+2.7.7.7|KEGG: 00240+2.7.7.7
Dr00082	DNA-directed DNA polymerase, family B, multifunctional domain|DNA-directed DNA polymerase, family B, exonuclease domain|Zinc finger, DNA-directed DNA polymerase, family B, alpha|DNA polymerase alpha catalytic subunit, N-terminal domain|DNA-directed DNA polymerase, family B|Ribonuclease H-like domain|DNA polymerase, palm domain|DNA-directed DNA polymerase, family B, pol2|DNA-directed DNA polymeras…	GO:0051536|GO:0003887|GO:0006303|GO:0001882|GO:0003896|GO:0006297|GO:0003677|GO:0008408|GO:0006269|GO:0006270|GO:0000166|GO:0019985|GO:0005658|GO:0006273|GO:0042575|GO:0005730|GO:0006351	EC:2.7.7.7	dna polymerase alpha catalytic	IPR006134|IPR006133|IPR015088|IPR024647|IPR012337|IPR023211|IPR006172|IPR004578|IPR017964	GO:0000166|GO:0003677|GO:0003887|GO:0006260|GO:0001882|GO:0003676|GO:0006139	EC:2.7.7.7	KEGG: 00230+2.7.7.7|KEGG: 00240+2.7.7.7
Dr00083	Haem peroxidase, plant/fungal/bacterial|Plant peroxidase|Haem peroxidase|Peroxidases heam-ligand binding site	GO:0005488|GO:0016491|GO:0005618		peroxidase	IPR002016|IPR010255|IPR000823|IPR019793	GO:0004601|GO:0006979|GO:0020037|GO:0055114	EC:1.11.1.7	KEGG: 00360+1.11.1.7|KEGG: 00940+1.11.1.7|MetaCyc: PWY-5461|MetaCyc: PWY-7214
Dr00084	Protein of unknown function DUF502				IPR007462
Dr00085	Protein of unknown function DUF502				IPR007462
Dr00086	RNA recognition motif domain|Nucleotide-binding, alpha-beta plait|Splicing factor, CC1-like	GO:0003723|GO:0006397|GO:0005634|GO:0000166		rna-binding protein 39-like	IPR000504|IPR012677|IPR006509	GO:0003676|GO:0000166|GO:0003723|GO:0005634|GO:0006397
Dr00087	Nucleotide-binding, alpha-beta plait	GO:0003723|GO:0006397|GO:0005634|GO:0000166		rna-binding protein 39-like	IPR012677	GO:0000166
Dr00088	Ribosomal protein L3|Translation protein, beta-barrel domain|Ribosomal protein L3, conserved site	GO:0005840|GO:0003735|GO:0006412|GO:0042254		60s ribosomal protein l3-like	IPR000597|IPR009000|IPR019926	GO:0003735|GO:0005622|GO:0005840|GO:0006412
Dr00089	Sphingomyelin synthase-like domain	GO:0009536|GO:0016020		sphingomyelin synthetase family protein	IPR025749
Dr00090	Transcription factor IIS, N-terminal|Transcription elongation factor, TFIIS/CRSP70, N-terminal, sub-type	GO:0003676|GO:0034645|GO:0010467|GO:0044238|GO:0044424		transcription elongation factor family partial	IPR017923|IPR003617	GO:0003677|GO:0005634|GO:0006351
Dr00091	WD40-repeat-containing domain|WD40/YVTN repeat-like-containing domain				IPR017986|IPR015943	GO:0005515
Dr00092	Drug/metabolite transporter	GO:0016020		auxin-induced protein 5ng4-like	IPR000620	GO:0016020
Dr00093	Drug/metabolite transporter	GO:0016023|GO:0016020		auxin-induced protein 5ng4-like	IPR000620	GO:0016020
Dr00094	DnaJ domain				IPR001623
Dr00095	S-adenosylmethionine synthetase|S-adenosylmethionine synthetase, C-terminal|S-adenosylmethionine synthetase superfamily	GO:0016020		uncharacterized protein	IPR002133|IPR022630|IPR022636	GO:0004478|GO:0005524|GO:0006556	EC:2.5.1.6	KEGG: 00270+2.5.1.6|MetaCyc: PWY-5041|MetaCyc: PWY-5912|MetaCyc: PWY-7270|Reactome: REACT_13433|UniPathway: UPA00315
Dr00096	S-adenosylmethionine synthetase|S-adenosylmethionine synthetase, N-terminal|S-adenosylmethionine synthetase, central domain|S-adenosylmethionine synthetase, C-terminal|S-adenosylmethionine synthetase superfamily|S-adenosylmethionine synthetase, conserved site	GO:0046914|GO:0016740|GO:0000166|GO:0044281|GO:0044424|GO:0044237|GO:0016020		s-adenosylmethionine synthetase	IPR002133|IPR022628|IPR022629|IPR022630|IPR022636|IPR022631	GO:0004478|GO:0005524|GO:0006556	EC:2.5.1.6	KEGG: 00270+2.5.1.6|MetaCyc: PWY-5041|MetaCyc: PWY-5912|MetaCyc: PWY-7270|Reactome: REACT_13433|UniPathway: UPA00315
Dr00097	Inorganic pyrophosphatase	GO:0004427|GO:0016020|GO:0005737|GO:0005634|GO:0000287|GO:0006119	EC:3.6.1.1	soluble inorganic pyrophosphatase	IPR008162	GO:0000287|GO:0004427|GO:0005737|GO:0006796	EC:3.6.1.1	KEGG: 00190+3.6.1.1|Reactome: REACT_21259|Reactome: REACT_71
Dr00098	Fructose-1,6-bisphosphatase class 1/Sedoheputulose-1,7-bisphosphatase|Fructose-1,6-bisphosphatase|Fructose-1,6-bisphosphatase, active site	GO:0046872|GO:0005737|GO:0032440|GO:0042132|GO:0006000|GO:0006013|GO:0006094|GO:0006096|GO:0006098|GO:0015976	EC:1.3.1.74|EC:3.1.3.11	fructose- -bisphosphatase	IPR000146|IPR028343|IPR020548	GO:0005975|GO:0042132|GO:0042578	EC:3.1.3.11	KEGG: 00010+3.1.3.11|KEGG: 00030+3.1.3.11|KEGG: 00051+3.1.3.11|KEGG: 00680+3.1.3.11|KEGG: 00710+3.1.3.11|MetaCyc: PWY-5484|Reactome: REACT_474|UniPathway: UPA00138|KEGG: 00010+3.1.3.11|KEGG: 00030+3.1.3.11|KEGG: 00051+3.1.3.11|KEGG: 00680+3.1.3.11|KEGG: 00710+3.1.3.11|MetaCyc: PWY-5484|UniPathway: UPA00138|KEGG: 00010+3.1.3.11|KEGG: 00030+3.1.3.11|KEGG: 00051+3.1.3.11|KEGG: 00680+3.1.3.11|KEGG: 0…
Dr00099
Dr00100	Peptidase S8, subtilisin-related|Peptidase S8/S53 domain|Proteinase inhibitor I9|Peptidase S8, subtilisin, Ser-active site	GO:0016023|GO:0008152|GO:0008236		subtilisin-like protease	IPR015500|IPR000209|IPR010259|IPR023828	GO:0004252|GO:0006508|GO:0042802|GO:0043086
Dr00101	Ribonuclease H-like domain				IPR012337	GO:0003676
Dr00102	Peptidase S8, subtilisin-related|Peptidase S8/S53 domain|Protease-associated domain, PA|Proteinase inhibitor I9|Peptidase S8, subtilisin, His-active site|Peptidase S8, subtilisin, Ser-active site	GO:0016023|GO:0008152|GO:0008236		subtilisin-like protease	IPR015500|IPR000209|IPR003137|IPR010259|IPR022398|IPR023828	GO:0004252|GO:0006508|GO:0042802|GO:0043086
Dr00103	MULE transposase domain				IPR018289
Dr00104	Peptidase S8, subtilisin-related|Peptidase S8/S53 domain|Proteinase inhibitor I9|Proteinase inhibitor, propeptide	GO:0008233|GO:0016023		subtilisin-like protease	IPR015500|IPR000209|IPR010259|IPR009020	GO:0004252|GO:0006508|GO:0042802|GO:0043086
Dr00105	Peptidase S8, subtilisin-related|Peptidase S8/S53 domain|Proteinase inhibitor I9|Proteinase inhibitor, propeptide|Peptidase S8, subtilisin, Asp-active site|Peptidase S8, subtilisin, Ser-active site	GO:0008233|GO:0016023		subtilisin-like protease	IPR015500|IPR000209|IPR010259|IPR009020|IPR023827|IPR023828	GO:0004252|GO:0006508|GO:0042802|GO:0043086
Dr00106	Actin-related protein|Actin, conserved site|Actin/actin-like conserved site	GO:0005618|GO:0048767|GO:0009845|GO:0005739|GO:0005730|GO:0009416|GO:0009611|GO:0051301|GO:0009733|GO:0005524|GO:0003774|GO:0005884|GO:0005200|GO:0005886		actin	IPR004000|IPR004001|IPR020902
Dr00107	Cytochrome b-c1 complex, subunit 6|Ubiquinol-cytochrome C reductase hinge domain	GO:0005750|GO:0008121|GO:0006122|GO:0045153|GO:0006118|GO:0015992|GO:0045285	EC:1.10.2.2	ubiquinol-cytochrome c reductase hinge protein	IPR003422|IPR023184	GO:0006122|GO:0008121
Dr00108	Zinc finger, RING-type|Domain of unknown function DUF4283|Zinc finger, RING/FYVE/PHD-type				IPR001841|IPR025558|IPR013083	GO:0005515|GO:0008270
Dr00109	F-box domain				IPR001810	GO:0005515
Dr00110
Dr00111	BURP domain				IPR004873
Dr00112	BURP domain				IPR004873
Dr00113	Protein of unknown function DUF167				IPR003746
Dr00114	Pentatricopeptide repeat|Tetratricopeptide-like helical				IPR002885|IPR011990	GO:0005515
Dr00115	Zinc finger, Dof-type	GO:0005488		f-box family protein	IPR003851	GO:0003677|GO:0006355
Dr00116	U box domain|Armadillo-type fold|Armadillo-like helical|Zinc finger, RING/FYVE/PHD-type	GO:0006950|GO:0008152		e3 ubiquitin-protein ligase pub23-like	IPR003613|IPR016024|IPR011989|IPR013083	GO:0000151|GO:0004842|GO:0016567|GO:0005488
Dr00117	Homeobox KN domain|POX domain|Homeodomain-like|Homeobox domain				IPR008422|IPR006563|IPR009057|IPR001356	GO:0003677|GO:0006355|GO:0003700|GO:0043565
Dr00118	Aluminum-activated malate transporter	GO:0016020		aluminum-activated malate transporter	IPR020966	GO:0015743
Dr00119
Dr00120	Histone deacetylase superfamily|Histone deacetylase domain|LRAT-like domain	GO:0016787		histone deacetylase	IPR000286|IPR023801|IPR007053
Dr00121	Protein kinase domain|Exocyst complex protein Exo70|Protein kinase-like domain|Cullin repeat-like-containing domain|Serine/threonine- / dual specificity protein kinase, catalytic domain|Protein kinase, ATP binding site|Serine/threonine-protein kinase, active site	GO:0044763|GO:0004672|GO:0000166|GO:0016310		serine threonine-protein kinase nek5-like	IPR000719|IPR004140|IPR011009|IPR016159|IPR002290|IPR017441|IPR008271	GO:0004672|GO:0005524|GO:0006468|GO:0000145|GO:0006887|GO:0016772|GO:0004674
Dr00122	NUDIX hydrolase domain|NUDIX hydrolase|NUDIX hydrolase domain-like|NUDIX hydrolase, conserved site|RNA pyrophosphohydrolase RppH	GO:0034432|GO:0005524|GO:0009507|GO:0004081|GO:0006144|GO:0006206	EC:3.6.1.17	diadenosine 5 - -tetraphosphate hydrolase	IPR000086|IPR015797|IPR020476|IPR020084|IPR022927	GO:0016787	EC:3.6.1.-	KEGG: 00230+3.6.1.-|KEGG: 00790+3.6.1.-
Dr00123	Protein kinase domain|NAF domain|Protein kinase-like domain|Serine/threonine- / dual specificity protein kinase, catalytic domain|NAF/FISL domain|Protein kinase, ATP binding site|Serine/threonine-protein kinase, active site	GO:0006468|GO:0010555|GO:0004674|GO:0009651|GO:0009409|GO:0009611|GO:0043266|GO:0005524|GO:0051365|GO:0007165|GO:0009069	EC:2.7.11.0	cbl-interacting serine threonine-protein kinase 9	IPR000719|IPR004041|IPR011009|IPR002290|IPR018451|IPR017441|IPR008271	GO:0004672|GO:0005524|GO:0006468|GO:0007165|GO:0016772|GO:0004674
Dr00124
Dr00125	Annexin, plant|Annexin repeat|Annexin				IPR009118|IPR018502|IPR001464	GO:0005509|GO:0005544
Dr00126
Dr00127
Dr00128	Amidohydrolase 3|Metal-dependent hydrolase, composite domain	GO:0016023		amidohydrolase family protein	IPR013108|IPR011059	GO:0016810
Dr00129	Uncharacterised protein family UPF0434/Trm112	GO:0035265|GO:0051726|GO:0042127		protein	IPR005651
Dr00130	Leucine-rich repeat|NB-ARC|Disease resistance protein|P-loop containing nucleoside triphosphate hydrolase	GO:0043168|GO:0032559|GO:0032550		nb-arc domain containing protein	IPR001611|IPR002182|IPR027417|IPR000767	GO:0005515|GO:0043531|GO:0006952
Dr00131	Regulator of chromosome condensation, RCC1|FYVE zinc finger|Brevis radix (BRX) domain|Transcription factor BREVIS RADIX, N-terminal domain|Regulator of chromosome condensation 1/beta-lactamase-inhibitor protein II|Zinc finger, FYVE/PHD-type|Pleckstrin homology-like domain|Zinc finger, RING/FYVE/PHD-type|Pleckstrin homology domain|Zinc finger, FYVE-related	GO:0005488|GO:0071944		regulator of chromosome condensation-like protein with fyve zinc finger domain	IPR000408|IPR000306|IPR013591|IPR027988|IPR009091|IPR011011|IPR011993|IPR013083|IPR001849|IPR017455	GO:0046872|GO:0005515|GO:0005543
Dr00132	DNA glycosylase|Helix-turn-helix, base-excision DNA repair, C-terminal|HhH-GPD domain|Endonuclease III-like, iron-sulphur cluster loop motif				IPR011257|IPR023170|IPR003265|IPR003651	GO:0003824|GO:0006281|GO:0006284|GO:0051539		Reactome: REACT_216
Dr00133	CheY-like superfamily|Signal transduction response regulator, receiver domain	GO:0009735|GO:0007165|GO:0044237		type-a response regulator	IPR011006|IPR001789	GO:0000156|GO:0000160|GO:0006355		Reactome: REACT_14797
Dr00134	AP2/ERF domain				IPR001471	GO:0003700|GO:0006355
Dr00135	Glycoside hydrolase, family 2, immunoglobulin-like beta-sandwich|Glycoside hydrolase, family 2, TIM barrel|Glycosyl hydrolases family 2, sugar binding domain|Beta galactosidase small chain/ domain 5|Glycoside hydrolase, family 2|Galactose-binding domain-like|Glycoside hydrolase, superfamily|Galactose mutarotase-like domain|Glycoside hydrolase, family 2/20, immunoglobulin-like beta-sandwich domain…	GO:0004553|GO:0005975	EC:3.2.1.0	beta-galactosidase	IPR006102|IPR006103|IPR006104|IPR004199|IPR008979|IPR017853|IPR011013|IPR013812|IPR014718|IPR013781|IPR006101|IPR023232|IPR023230	GO:0004553|GO:0005975|GO:0004565|GO:0009341|GO:0003824|GO:0030246	EC:3.2.1.23	KEGG: 00052+3.2.1.23|KEGG: 00511+3.2.1.23|KEGG: 00531+3.2.1.23|KEGG: 00600+3.2.1.23|KEGG: 00604+3.2.1.23|MetaCyc: PWY-6791|MetaCyc: PWY-6807
Dr00136	Glycosyl hydrolases family 2, sugar binding domain|Galactose-binding domain-like	GO:0009341|GO:0030246|GO:0009507|GO:0004565|GO:0006012|GO:0006027|GO:0006687|GO:0046486	EC:3.2.1.23	beta-galactosidase	IPR006104|IPR008979	GO:0004553|GO:0005975
Dr00137	Zinc finger, CCHC-type				IPR001878	GO:0003676|GO:0008270
Dr00138	Glycoside hydrolase, family 2, immunoglobulin-like beta-sandwich|Glycoside hydrolase, family 2, TIM barrel|Beta galactosidase small chain/ domain 5|Glycoside hydrolase, family 2|Glycoside hydrolase, superfamily|Galactose mutarotase-like domain|Glycoside hydrolase, family 2/20, immunoglobulin-like beta-sandwich domain|Glycoside hydrolase-type carbohydrate-binding, subgroup|Glycoside hydrolase, cat…	GO:0004553|GO:0005975	EC:3.2.1.0	beta-galactosidase	IPR006102|IPR006103|IPR004199|IPR017853|IPR011013|IPR013812|IPR014718|IPR013781|IPR006101|IPR023232|IPR023230	GO:0004553|GO:0005975|GO:0004565|GO:0009341|GO:0003824|GO:0030246	EC:3.2.1.23	KEGG: 00052+3.2.1.23|KEGG: 00511+3.2.1.23|KEGG: 00531+3.2.1.23|KEGG: 00600+3.2.1.23|KEGG: 00604+3.2.1.23|MetaCyc: PWY-6791|MetaCyc: PWY-6807
Dr00139	HAD-like domain|HAD hydrolase, subfamily IA	GO:0016787|GO:0005739		haloacid dehalogenase-like hydrolase domain-containing protein 3-like	IPR023214|IPR006439	GO:0008152|GO:0016787
Dr00140	Steroid receptor RNA activator-protein/coat protein complex II, Sec31				IPR009917
Dr00141	WD40 repeat|WD40-repeat-containing domain|WD40/YVTN repeat-like-containing domain|WD40 repeat, conserved site	GO:0016020		protein transport protein sec31	IPR001680|IPR017986|IPR015943|IPR019775	GO:0005515
Dr00142	Cyclin PHO80-like|Cyclin-like	GO:0000079|GO:0019901		cyclin-dependent protein	IPR013922|IPR013763	GO:0000079|GO:0019901
Dr00143
Dr00144	Protein of unknown function DUF617, plant				IPR006460
Dr00145	Methyltransferase domain	GO:0008152|GO:0008168	EC:2.1.1.0	methyltransferase-like protein 13-like	IPR025714
Dr00146	Coproporphyrinogen III oxidase, aerobic|Coproporphyrinogen III oxidase, conserved site	GO:0004109|GO:0006782|GO:0009570|GO:0016020|GO:0048046|GO:0042803|GO:0055114|GO:0015994	EC:1.3.3.3	coproporphyrinogen iii oxidase	IPR001260|IPR018375	GO:0004109|GO:0006779|GO:0055114	EC:1.3.3.3	KEGG: 00860+1.3.3.3|MetaCyc: PWY-5531|MetaCyc: PWY-7159|UniPathway: UPA00251
Dr00147		GO:0008026|GO:0003676|GO:0005524|GO:0005739		dead-box atp-dependent rna helicase 24
Dr00148
Dr00149	Glutamyl/glutaminyl-tRNA synthetase|Glutamyl/glutaminyl-tRNA synthetase, class Ib, catalytic domain|Rossmann-like alpha/beta/alpha sandwich fold	GO:0000166|GO:0004812|GO:0006418		glutaminyl-trna synthetase	IPR000924|IPR020058|IPR014729	GO:0000166|GO:0005524|GO:0005737|GO:0016876|GO:0043039		Reactome: REACT_71
Dr00150	EF hand associated, type-1|EF hand associated, type-2|Mitochondrial Rho-like|Small GTPase superfamily|P-loop containing nucleoside triphosphate hydrolase|EF-hand domain pair|Small GTPase superfamily, Ras type|Small GTPase superfamily, Rho type|Small GTPase superfamily, Rab type|Small GTPase superfamily, mitochondrial Rho|EF-hand domain|MIRO|EF-Hand 1, calcium-binding site	GO:0005525|GO:0005509|GO:0006184|GO:0005741|GO:0007264|GO:0019725|GO:0009790|GO:0007005|GO:0009737|GO:0003924|GO:0009860		protein	IPR013566|IPR013567|IPR013684|IPR027417|IPR011992|IPR001806|IPR020849|IPR003578|IPR003579|IPR021181|IPR002048|IPR020860|IPR018247	GO:0005525|GO:0005622|GO:0007264|GO:0005509|GO:0003924|GO:0006184|GO:0007165|GO:0016020|GO:0015031|GO:0005741|GO:0019725		Reactome: REACT_11044
Dr00151		GO:0009536		60s ribosomal export protein nmd3
Dr00152	Lipase, class 3	GO:0004806|GO:0009507|GO:0047714|GO:0008970|GO:0046486|GO:0009395	EC:3.1.1.3|EC:3.1.1.26|EC:3.1.1.32	phospholipase a1- chloroplastic-like	IPR002921	GO:0004806|GO:0006629		Reactome: REACT_14797|Reactome: REACT_604
Dr00153
Dr00154	Probable transposase, Ptta/En/Spm, plant	GO:0016491		protein	IPR004252
Dr00155	Lipase, class 3	GO:0009536|GO:0052689|GO:0016298|GO:0016042	EC:3.1.1.0	phospholipase a1- chloroplastic-like	IPR002921	GO:0004806|GO:0006629		Reactome: REACT_14797|Reactome: REACT_604
Dr00156	FAD-linked oxidase, C-terminal|FAD-linked oxidase-like, C-terminal|Vanillyl-alcohol oxidase, C-terminal subdomain 2	GO:0051990|GO:0050660|GO:0008762|GO:0004458|GO:0005739|GO:0055114|GO:0006040|GO:0006090	EC:1.1.1.158|EC:1.1.2.4	d-2-hydroxyglutarate dehydrogenase	IPR004113|IPR016164|IPR016171	GO:0003824|GO:0050660
Dr00157	Lipase, class 3	GO:0004806|GO:0009536|GO:0016042|GO:0046486	EC:3.1.1.3	phospholipase a1- chloroplastic-like	IPR002921	GO:0004806|GO:0006629		Reactome: REACT_14797|Reactome: REACT_604
Dr00158	EF-hand domain|EF-hand domain pair|EF-Hand 1, calcium-binding site	GO:0046872		calcium-binding protein cml42	IPR002048|IPR011992|IPR018247	GO:0005509
Dr00159	Glycoside hydrolase, family 14|Lipase, class 3|MULE transposase domain|Glycoside hydrolase, superfamily|Glycoside hydrolase, catalytic domain	GO:0009536|GO:0052689|GO:0016298|GO:0016042	EC:3.1.1.0	phospholipase a1- chloroplastic-like	IPR001554|IPR002921|IPR018289|IPR017853|IPR013781	GO:0000272|GO:0016161|GO:0004806|GO:0006629|GO:0003824|GO:0005975	EC:3.2.1.2	KEGG: 00500+3.2.1.2|MetaCyc: PWY-6724|MetaCyc: PWY-842|Reactome: REACT_14797|Reactome: REACT_604
Dr00160	Uncharacterised domain NUC173|Armadillo-type fold				IPR012978|IPR016024	GO:0005488
Dr00161
Dr00162	AP2/ERF domain|DNA-binding domain	GO:0005739|GO:0008152		ap2-like ethylene-responsive transcription factor at2g41710-like	IPR001471|IPR016177	GO:0003700|GO:0006355|GO:0003677
Dr00163	Cytokinin riboside 5'-monophosphate phosphoribohydrolase LOG	GO:0016799|GO:0016829|GO:0005634|GO:0005829|GO:0009691|GO:0005739	EC:3.2.2.0	protein	IPR005269
Dr00164	Ribosomal protein L1/ribosomal biogenesis protein|Ribosomal protein L1-like|Ribosomal protein L1, 2-layer alpha/beta-sandwich|Ribosomal protein L1, 3-layer alpha/beta-sandwich|Ribosomal protein L1, conserved site|Ribosomal protein L1, bacterial-type	GO:0009507|GO:0044446		50s ribosomal protein l1	IPR028364|IPR023674|IPR016094|IPR016095|IPR023673|IPR005878	GO:0003723|GO:0003735|GO:0006412|GO:0015934
Dr00165	Pyridine nucleotide-disulphide oxidoreductase, NAD-binding domain|Thioredoxin domain|Pyridine nucleotide-disulphide oxidoreductase, FAD/NAD(P)-binding domain|FAD-dependent pyridine nucleotide-disulphide oxidoreductase|Pyridine nucleotide-disulphide oxidoreductase, class-II|Thioredoxin-like fold|Thioredoxin reductase|Pyridine nucleotide-disulphide oxidoreductase, class-II, active site	GO:0042744|GO:0022900|GO:0045454|GO:0042802|GO:0016671|GO:0050660|GO:0009570|GO:0019430|GO:0004791|GO:0006118|GO:0006206	EC:1.8.4.0|EC:1.8.1.9	nadph-dependent thioredoxin reductase 3-like	IPR001327|IPR013766|IPR023753|IPR012336|IPR013027|IPR000103|IPR005982|IPR008255	GO:0016491|GO:0050660|GO:0055114|GO:0045454|GO:0004791|GO:0005737|GO:0019430	EC:1.8.1.9	KEGG: 00240+1.8.1.9|KEGG: 00450+1.8.1.9
Dr00166	DNA glycosylase				IPR011257	GO:0003824|GO:0006281		Reactome: REACT_216
Dr00167
Dr00168	BURP domain				IPR004873
Dr00169	Domain of unknown function DUF239|Domain of unknown function DUF4409|Forkhead-associated (FHA) domain				IPR004314|IPR025521|IPR000253	GO:0005515
Dr00170
Dr00171
Dr00172	BURP domain				IPR004873
Dr00173	Cytokinin riboside 5'-monophosphate phosphoribohydrolase LOG	GO:0016799|GO:0005634|GO:0005829|GO:0009691|GO:0005739	EC:3.2.2.0	protein	IPR005269
Dr00174	BURP domain				IPR004873
Dr00175	Glycosyl transferase, family 4	GO:0016020|GO:0016780	EC:2.7.8.0	udp-n-acetylglucosamine: dolichol phosphate n-acetylglucosamine-1-p transferase	IPR000715	GO:0008963|GO:0016021	EC:2.7.8.13	KEGG: 00550+2.7.8.13|MetaCyc: PWY-5265|MetaCyc: PWY-6470|MetaCyc: PWY-6471|UniPathway: UPA00219
Dr00176	Probable transposase, Ptta/En/Spm, plant				IPR004252
Dr00177	Phosphatidylinositol-4-phosphate 5-kinase|Phosphatidylinositol-4-phosphate 5-kinase, core|MORN motif|Phosphatidylinositol-4-phosphate 5-kinase, N-terminal domain|Phosphatidylinositol-4-phosphate 5-kinase, C-terminal|Phosphatidylinositol-4-phosphate 5-kinase, core, subgroup|Phosphatidylinositol-4-phosphate 5-kinase, plant	GO:0046488|GO:0044763|GO:0009856|GO:0016307|GO:0044767|GO:0016310|GO:0009653|GO:0016043|GO:0044707|GO:0005886		phosphatidylinositol-4-phosphate 5-kinase	IPR023610|IPR002498|IPR003409|IPR027484|IPR027483|IPR016034|IPR017163	GO:0016307|GO:0046488|GO:0005524|GO:0016308	EC:2.7.1.68	KEGG: 00562+2.7.1.68|MetaCyc: PWY-6351|MetaCyc: PWY-6352
Dr00178
Dr00179	Protein of unknown function DUF702|Zinc finger, lateral root primordium type 1|Lateral Root Primordium type 1, C-terminal				IPR007818|IPR006510|IPR006511
Dr00180	Serine-threonine/tyrosine-protein kinase catalytic domain|Protein kinase-like domain|Serine/threonine- / dual specificity protein kinase, catalytic domain|Protein kinase domain|Protein kinase, ATP binding site|Serine/threonine-protein kinase, active site	GO:0016301|GO:0000166		serine threonine-protein kinase-like protein at3g51990-like	IPR001245|IPR011009|IPR002290|IPR000719|IPR017441|IPR008271	GO:0004672|GO:0006468|GO:0016772|GO:0005524|GO:0004674
Dr00181
Dr00182		GO:0009536		uncharacterized protein loc100249731
Dr00183	C2 domain				IPR000008	GO:0005515
Dr00184
Dr00185
Dr00186
Dr00187	Cyclin C/H/T/L|CyclinH/Ccl1|Cyclin-like	GO:0044238|GO:0007049|GO:0044260|GO:0050794|GO:0005634		cyclin h-1	IPR015429|IPR027081|IPR013763	GO:0000079|GO:0006355|GO:0019901|GO:0006351|GO:0016538|GO:0070985
Dr00188	Uncharacterised protein family Ycf20	GO:0010196|GO:0009507		protein	IPR007572
Dr00189	Oxoglutarate/iron-dependent dioxygenase				IPR005123	GO:0016491|GO:0016706|GO:0055114
Dr00190	BSD				IPR005607
Dr00191	Mo25-like|Armadillo-type fold|Armadillo-like helical	GO:0042254|GO:0030529		mo25-like protein	IPR013878|IPR016024|IPR011989	GO:0005488		Reactome: REACT_11163|Reactome: REACT_498
Dr00192
Dr00193	Zinc finger, CCHC-type				IPR001878	GO:0003676|GO:0008270
Dr00194
Dr00195	Mo25-like|Armadillo-type fold|Armadillo-like helical				IPR013878|IPR016024|IPR011989	GO:0005488		Reactome: REACT_11163|Reactome: REACT_498
Dr00196		GO:0044464|GO:0016757		transferring glycosyl
Dr00197	BTB/POZ|MATH|TRAF-like|BTB/POZ fold|BTB/POZ-like	GO:0071472|GO:0042631|GO:0005634		btb poz and math domain-containing protein 2-like	IPR013069|IPR002083|IPR008974|IPR011333|IPR000210	GO:0005515
Dr00198	EXS, C-terminal	GO:0016020		spx and exs domain-containing protein 1-like	IPR004342	GO:0016021
Dr00199	EXS, C-terminal	GO:0016023|GO:0016021		spx and exs domain-containing protein 1-like	IPR004342	GO:0016021
Dr00200	EXS, C-terminal	GO:0016020|GO:0016023		spx and exs domain-containing protein 1-like	IPR004342	GO:0016021
Dr00201
Dr00202	Peptidase C48, SUMO/Sentrin/Ubl1				IPR003653	GO:0006508|GO:0008234
Dr00203
Dr00204	Probable transposase, Ptta/En/Spm, plant				IPR004252
Dr00205	Glycoside hydrolase, family 35|D-galactoside/L-rhamnose binding SUEL lectin domain|Galactose-binding domain-like|Glycoside hydrolase, superfamily|Glycoside hydrolase, catalytic domain	GO:0016023|GO:0048046|GO:0030246|GO:0004565|GO:0006012|GO:0006027|GO:0006687|GO:0009341|GO:0046486	EC:3.2.1.23	beta-galactosidase 3-like	IPR001944|IPR000922|IPR008979|IPR017853|IPR013781	GO:0004553|GO:0005975|GO:0030246|GO:0003824	EC:3.2.1.23	KEGG: 00052+3.2.1.23|KEGG: 00511+3.2.1.23|KEGG: 00531+3.2.1.23|KEGG: 00600+3.2.1.23|KEGG: 00604+3.2.1.23|MetaCyc: PWY-6791|MetaCyc: PWY-6807
Dr00206
Dr00207	Methylthiotransferase/radical SAM-type protein|Methylthiotransferase, N-terminal|TRAM domain|Radical SAM|Radical SAM, alpha/beta horseshoe|Elongator protein 3/MiaB/NifB|Methylthiotransferase|tRNA-i(6)A37 modification enzyme MiaB|Methylthiotransferase, conserved site	GO:0046872|GO:0006400|GO:0016740|GO:0051539|GO:0032440|GO:0005739|GO:0055114	EC:1.3.1.74	protein	IPR023970|IPR013848|IPR002792|IPR007197|IPR023404|IPR006638|IPR005839|IPR006463|IPR020612	GO:0003824|GO:0009451|GO:0051539|GO:0051536|GO:0016740|GO:0043412|GO:0005737|GO:0006400	EC:2.-.-.-	KEGG: 00231+2.-.-.-
Dr00208	Tetratricopeptide-like helical|Tetratricopeptide repeat|Tetratricopeptide repeat-containing domain	GO:0006792|GO:0010438		male sterility 5 family protein	IPR011990|IPR019734|IPR013026	GO:0005515
Dr00209	Ubiquitin fusion degradation protein UFD1	GO:0006511		ubiquitin fusion degradation protein	IPR004854	GO:0006511
Dr00210
Dr00211
Dr00212	Glutathione S-transferase, C-terminal|Glutathione S-transferase, N-terminal|Glutathione S-transferase, C-terminal-like|Thioredoxin-like fold	GO:0016829|GO:0060416|GO:0006749|GO:0016740|GO:0048527|GO:0009507|GO:0046686|GO:0080167|GO:0009704		glutathione s-transferase	IPR004046|IPR004045|IPR010987|IPR012336	GO:0005515
Dr00213	Thioredoxin-like fold	GO:0045454		protein	IPR012336
Dr00214
Dr00215
Dr00216
Dr00217	Phospholipid/glycerol acyltransferase|HAD-like domain	GO:0016023|GO:0004366|GO:0042967|GO:0046486	EC:2.3.1.15	er glycerol-phosphate acyltransferase	IPR002123|IPR023214	GO:0008152|GO:0016746
Dr00218	Copine|Zinc finger, RING/FYVE/PHD-type|von Willebrand factor, type A|Zinc finger, RING-type	GO:0005739|GO:0008270|GO:0016874		e3 ubiquitin-protein ligase rglg2-like	IPR010734|IPR013083|IPR002035|IPR001841	GO:0005515|GO:0008270
Dr00219	Major intrinsic protein|Aquaporin-like|Major intrinsic protein, conserved site	GO:0005773|GO:0046658|GO:0006810|GO:0009737|GO:0016021|GO:0005634|GO:0005215		plasma membrane intrinsic protein	IPR000425|IPR023271|IPR022357	GO:0005215|GO:0006810|GO:0016020
Dr00220	WD40 repeat|G-protein beta WD-40 repeat|WD40-repeat-containing domain|WD40/YVTN repeat-like-containing domain|WD40 repeat, conserved site	GO:0004402|GO:0016573|GO:0000123|GO:0042967	EC:2.3.1.48	u5 small nuclear ribonucleoprotein 40 kda	IPR001680|IPR017986|IPR015943|IPR020472|IPR019775	GO:0005515
Dr00221
Dr00222
Dr00223
Dr00224	Amino acid/polyamine transporter I	GO:0016020		neutral amino acid transport protein	IPR002293	GO:0003333|GO:0015171|GO:0016020
Dr00225	Amino acid/polyamine transporter I	GO:0003333|GO:0015171|GO:0016021		amino acid	IPR002293	GO:0003333|GO:0015171|GO:0016020
Dr00226
Dr00227	Glycosyl hydrolase family 32, N-terminal|Glycosyl hydrolase family 32, C-terminal|Concanavalin A-like lectin/glucanases superfamily|Glycosyl hydrolase, five-bladed beta-propellor domain|Glycoside hydrolase, family 32	GO:0005773|GO:0004575|GO:0005982|GO:0005985|GO:0017177	EC:3.2.1.26|EC:3.2.1.48	vacuolar invertase	IPR013148|IPR013189|IPR008985|IPR023296|IPR001362	GO:0004553|GO:0005975
Dr00228	Glycoside hydrolase family 38, N-terminal domain|Glycosyl hydrolase family 38, C-terminal|Glycoside hydrolase, family 38, central domain|Galactose mutarotase-like domain|Glycoside hydrolase/deacetylase, beta/alpha-barrel|Glycosyl hydrolase, family 13, all-beta|Glycoside hydrolase 38/57, N-terminal domain	GO:0004559|GO:0016023|GO:0030246|GO:0006013|GO:0005618|GO:0008270	EC:3.2.1.24	lysosomal alpha-mannosidase-like	IPR000602|IPR011682|IPR015341|IPR011013|IPR011330|IPR013780|IPR027291	GO:0004559|GO:0005975|GO:0006013|GO:0015923|GO:0004553|GO:0008270|GO:0003824|GO:0030246
Dr00229	Glycosyl hydrolase family 38, C-terminal|Galactose mutarotase-like domain	GO:0004559|GO:0003676|GO:0016023|GO:0030246|GO:0006013|GO:0005618|GO:0008270|GO:0015074	EC:3.2.1.24	lysosomal alpha-mannosidase	IPR011682|IPR011013	GO:0006013|GO:0015923|GO:0003824|GO:0005975|GO:0030246
Dr00230	B3/B4 tRNA-binding domain|tRNA synthetase, B5-domain|DNA binding domain, putative|Phenylalanyl-tRNA synthetase, B3/B4|Phenylalanyl-tRNA synthetase, class IIc, beta subunit, archae/euk cytosolic	GO:0006432|GO:0005524|GO:0004826|GO:0000287|GO:0000049|GO:0000162|GO:0006571|GO:0009094|GO:0009328	EC:6.1.1.20	protein	IPR005146|IPR005147|IPR009061|IPR020825|IPR004531	GO:0003723|GO:0004826|GO:0000287|GO:0005524|GO:0006432|GO:0000166|GO:0005737	EC:6.1.1.20	KEGG: 00970+6.1.1.20
Dr00231	tRNA synthetase, B5-domain	GO:0005739|GO:0097159|GO:0016874|GO:1901363		protein	IPR005147	GO:0000287|GO:0003723|GO:0005524|GO:0006432	EC:6.1.1.20	KEGG: 00970+6.1.1.20
Dr00232	WD40-repeat-containing domain|WD40/YVTN repeat-like-containing domain	GO:0005524|GO:0009507		protein mrp homolog	IPR017986|IPR015943	GO:0005515
Dr00233	Amino acid transporter, transmembrane	GO:0015800|GO:0015175|GO:0015804|GO:0015172|GO:0016021|GO:0005739|GO:0015399		amino acid	IPR013057
Dr00234	SKP1 component|SKP1 component, dimerisation|SKP1 component, POZ domain|Zinc finger, SWIM-type|BTB/POZ fold|Zinc finger, PMZ-type	GO:0005737|GO:0005730|GO:0006511		skp1-like protein	IPR001232|IPR016072|IPR016073|IPR007527|IPR011333|IPR006564	GO:0006511|GO:0008270		Reactome: REACT_6185|UniPathway: UPA00143|UniPathway: UPA00143
Dr00235	ABC transporter-like|ABC transporter, transmembrane domain|P-loop containing nucleoside triphosphate hydrolase|ABC transporter type 1, transmembrane domain|AAA+ ATPase domain|ABC transporter, conserved site	GO:0009639|GO:0009791|GO:0016021|GO:0048513|GO:0008559|GO:0009926|GO:0044767|GO:0006200|GO:0015440|GO:0005524|GO:0006855|GO:0015833	EC:3.6.3.44|EC:3.6.3.43	multidrug resistance protein	IPR003439|IPR001140|IPR027417|IPR011527|IPR003593|IPR017871	GO:0005524|GO:0016887|GO:0006810|GO:0016021|GO:0042626|GO:0055085|GO:0000166|GO:0017111
Dr00236
Dr00237	Lipase, GDSL|SGNH hydrolase-type esterase domain	GO:0016788|GO:0016023		anther-specific proline-rich protein apg precursor	IPR001087|IPR013831	GO:0006629|GO:0016788|GO:0016787
Dr00238	Protein of unknown function DUF3223|Copper amine oxidase, N2/N3-terminal	GO:0005507|GO:0048038|GO:0009507|GO:0009308		uncharacterized protein	IPR021602|IPR015801	GO:0005507|GO:0009308|GO:0048038
Dr00239	MORN motif				IPR003409
Dr00240	NAD-dependent epimerase/dehydratase|NAD(P)-binding domain	GO:0044237|GO:0003824|GO:0050662|GO:0000166|GO:0005886		cinnamyl alcohol dehydrogenase	IPR001509|IPR016040	GO:0003824|GO:0044237|GO:0050662
Dr00241
Dr00242
Dr00243	NAD(P)-binding domain	GO:0044237|GO:0016491|GO:0050662|GO:0000166|GO:0005886		cinnamyl alcohol dehydrogenase	IPR016040
Dr00244	NAD(P)-binding domain	GO:0044237|GO:0003824|GO:0050662|GO:0000166|GO:0005886		cinnamyl alcohol dehydrogenase	IPR016040
Dr00245	Peptidase C48, SUMO/Sentrin/Ubl1				IPR003653	GO:0006508|GO:0008234
Dr00246	CRIB domain				IPR000095
Dr00247		GO:0032259|GO:0016070|GO:0008168|GO:0005739	EC:2.1.1.0	radical sam domain-containing protein
Dr00248	Cupin 1|RmlC-like cupin domain|RmlC-like jelly roll fold				IPR006045|IPR011051|IPR014710	GO:0045735
Dr00249	Cupin 1|Germin|RmlC-like cupin domain|RmlC-like jelly roll fold				IPR006045|IPR011051|IPR014710|IPR001929	GO:0045735|GO:0030145
Dr00250
Dr00251	BURP domain				IPR004873
Dr00252	BURP domain				IPR004873
Dr00253
Dr00254	BURP domain				IPR004873
Dr00255	BURP domain				IPR004873
Dr00256
Dr00257	BURP domain	GO:0050896		burp domain-containing protein	IPR004873
Dr00258
Dr00259
Dr00260	Pentatricopeptide repeat|Tetratricopeptide-like helical	GO:0005739		pentatricopeptide repeat-containing protein	IPR002885|IPR011990	GO:0005515
Dr00261	ZF-HD homeobox protein, Cys/His-rich dimerisation domain|Homeodomain-like				IPR006456|IPR009057	GO:0003677
Dr00262
Dr00263	Annexin, plant|Annexin repeat|Glycoside hydrolase, family 85	GO:0006979|GO:0005829|GO:0005507|GO:0005618|GO:0008270|GO:0009414|GO:0005509|GO:0005739|GO:0009651|GO:0009409|GO:0005544|GO:0004601|GO:0009408|GO:0009579|GO:0005524|GO:0009737|GO:0009570|GO:0042803|GO:0005773|GO:0046686|GO:0005886|GO:0048046|GO:0006804	EC:1.11.1.7	annexin	IPR009118|IPR018502|IPR005201	GO:0005509|GO:0005544|GO:0005737|GO:0033925	EC:3.2.1.96	KEGG: 00511+3.2.1.96
Dr00264	Probable transposase, Ptta/En/Spm, plant				IPR004252
Dr00265
Dr00266
Dr00267
Dr00268	MIF4-like, type 1/2/3				IPR016021
Dr00269	Protein of unknown function DUF1517	GO:0009536		uncharacterized protein	IPR010903
Dr00270
Dr00271	Protein of unknown function DUF1517	GO:0009536		uncharacterized protein	IPR010903
Dr00272	Pentatricopeptide repeat				IPR002885
Dr00273		GO:0005739		pentatricopeptide repeat-containing protein at1g10270-like
Dr00274
Dr00275	Pentatricopeptide repeat	GO:0005739		pentatricopeptide repeat-containing protein at1g10270-like	IPR002885
Dr00276	HAT dimerisation domain, C-terminal|Protein of unknown function DUF1517|Ribonuclease H-like domain	GO:0003676|GO:0046983		70 kda peptidyl-prolyl isomerase	IPR008906|IPR010903|IPR012337	GO:0046983|GO:0003676
Dr00277	Protein of unknown function DUF1517				IPR010903
Dr00278	Cytochrome P450	GO:0050896|GO:0031407|GO:0006633|GO:0046872|GO:0016491|GO:0009579|GO:0016020|GO:0016836|GO:0044434	EC:4.2.1.0	allene oxide synthase	IPR001128	GO:0005506|GO:0016705|GO:0020037|GO:0055114		Reactome: REACT_13433
Dr00279	Cytochrome P450	GO:0009978|GO:0031407|GO:0009753|GO:0055114|GO:0009620|GO:0005739|GO:0009611|GO:0009941|GO:0016705|GO:0009055|GO:0004497|GO:0009535|GO:0047987|GO:0010287|GO:0020037|GO:0005506|GO:0006118	EC:4.2.1.92	allene oxide synthase	IPR001128	GO:0005506|GO:0016705|GO:0020037|GO:0055114		Reactome: REACT_13433
Dr00280	HAD-like domain	GO:0005388|GO:0005516|GO:0070588|GO:0055081|GO:0009651|GO:0016021|GO:0042742|GO:0046872|GO:0009705|GO:0005524|GO:0043069|GO:0009507|GO:0009624|GO:0005886|GO:0016529	EC:3.6.3.8	autoinhibited calcium atpase	IPR023214
Dr00281	COG complex component, COG2|Uncharacterised protein family Ycf20	GO:0015031|GO:0016020|GO:0007030		conserved oligomeric golgi complex subunit	IPR009316|IPR007572	GO:0007030|GO:0015031|GO:0016020
Dr00282
Dr00283	HAD-like domain	GO:0005388|GO:0005516|GO:0070588|GO:0055081|GO:0009651|GO:0016021|GO:0042742|GO:0046872|GO:0009705|GO:0016023|GO:0005524|GO:0043069|GO:0009507|GO:0009624|GO:0005886|GO:0016529	EC:3.6.3.8	autoinhibited calcium atpase	IPR023214
Dr00284	Expansin|Expansin, cellulose-binding-like domain|RlpA-like double-psi beta-barrel domain|Expansin/Lol pI|Barwin-like endoglucanase|Expansin/pollen allergen, DPBB domain	GO:0005576|GO:0016020|GO:0009664|GO:0006949		expansin 2	IPR002963|IPR007117|IPR009009|IPR014733|IPR007118|IPR007112	GO:0009664|GO:0005576
Dr00285	Serine-threonine/tyrosine-protein kinase catalytic domain|Protein kinase-like domain|Protein kinase domain	GO:0004672		serine threonine-protein kinase ht1-like	IPR001245|IPR011009|IPR000719	GO:0004672|GO:0006468|GO:0016772|GO:0005524
Dr00286	Glycoside hydrolase, clan GH-D|Glycoside hydrolase, family 27|Glycoside hydrolase, superfamily|Glycosyl hydrolase, family 13, all-beta|Aldolase-type TIM barrel	GO:0052692|GO:0009505|GO:0005773|GO:0016023|GO:0046477|GO:0009311|GO:0016139	EC:3.2.1.22	alpha-galactosidase	IPR000111|IPR017853|IPR013780|IPR013785|IPR002241	GO:0004553|GO:0005975|GO:0003824	EC:3.2.1.22	KEGG: 00052+3.2.1.22|KEGG: 00561+3.2.1.22|KEGG: 00600+3.2.1.22|KEGG: 00603+3.2.1.22|MetaCyc: PWY-6527
Dr00287	Protein kinase domain|Protein kinase-like domain|Serine/threonine- / dual specificity protein kinase, catalytic domain|Serine/threonine-protein kinase, active site	GO:0006468|GO:0004674|GO:0005524|GO:0000165|GO:0009069	EC:2.7.11.0	protein	IPR000719|IPR011009|IPR002290|IPR008271	GO:0004672|GO:0005524|GO:0006468|GO:0016772|GO:0004674
Dr00288	Ovate protein family, C-terminal|DNA-binding domain, ovate family-like	GO:0003677		protein	IPR006458|IPR025830	GO:0003677
Dr00289	Armadillo|U box domain|Armadillo-type fold|Armadillo-like helical|Zinc finger, RING/FYVE/PHD-type	GO:0009536		arm repeat protein	IPR000225|IPR003613|IPR016024|IPR011989|IPR013083	GO:0005515|GO:0000151|GO:0004842|GO:0016567|GO:0005488
Dr00290	Calcium/calmodulin-dependent/calcium-dependent protein kinase|Protein kinase domain|NAF domain|Protein kinase-like domain|Serine/threonine- / dual specificity protein kinase, catalytic domain|NAF/FISL domain|Protein kinase, ATP binding site|Serine/threonine-protein kinase, active site	GO:0009788|GO:0006468|GO:0004674|GO:0005524|GO:0009069	EC:2.7.11.0	serine-threonine kinase	IPR020636|IPR000719|IPR004041|IPR011009|IPR002290|IPR018451|IPR017441|IPR008271	GO:0004672|GO:0005524|GO:0006468|GO:0007165|GO:0016772|GO:0004674
Dr00291		GO:0016023		methyltransferase-related protein
Dr00292	GTP binding domain|P-loop containing nucleoside triphosphate hydrolase|Small GTP-binding protein domain|GTP-binding protein, ribosome biogenesis, YsxC	GO:0000917|GO:0005525		gtp-binding protein cgpa	IPR006073|IPR027417|IPR005225|IPR019987	GO:0005525|GO:0000917
Dr00293
Dr00294
Dr00295	AUX/IAA protein|Auxin response factor|Aux/IAA-ARF-dimerisation	GO:0009987		auxin response factor 11	IPR003311|IPR010525|IPR011525	GO:0005634|GO:0006355|GO:0003677|GO:0009725|GO:0046983
Dr00296	Calcium/calmodulin-dependent/calcium-dependent protein kinase|Protein kinase domain|NAF domain|Protein kinase-like domain|Serine/threonine- / dual specificity protein kinase, catalytic domain|NAF/FISL domain|Protein kinase, ATP binding site|Serine/threonine-protein kinase, active site	GO:0009987|GO:0050896|GO:0004672		cbl-interacting serine threonine-protein	IPR020636|IPR000719|IPR004041|IPR011009|IPR002290|IPR018451|IPR017441|IPR008271	GO:0004672|GO:0005524|GO:0006468|GO:0007165|GO:0016772|GO:0004674
Dr00297	ADP/ATP carrier protein	GO:0006810|GO:0005471|GO:0005524|GO:0016021		tlc atp adp transporter	IPR004667	GO:0005471|GO:0005524|GO:0006810|GO:0016021
Dr00298	Saposin-like type B, 2|Saposin-like type B, 1|Saposin-like|Saposin B	GO:0044444|GO:0043231		protein	IPR008138|IPR007856|IPR011001|IPR008139	GO:0006629
Dr00299	Haem peroxidase, plant/fungal/bacterial|Plant peroxidase|Haem peroxidase|Peroxidases heam-ligand binding site|Peroxidase, active site	GO:0046872|GO:0042744|GO:0016023|GO:0020037|GO:0005618|GO:0004601|GO:0048046|GO:0055114|GO:0006804	EC:1.11.1.7	peroxidase 52 precursor	IPR002016|IPR010255|IPR000823|IPR019793|IPR019794	GO:0004601|GO:0006979|GO:0020037|GO:0055114	EC:1.11.1.7	KEGG: 00360+1.11.1.7|KEGG: 00940+1.11.1.7|MetaCyc: PWY-5461|MetaCyc: PWY-7214
Dr00300	Transposase, MuDR, plant				IPR004332
Dr00301	Pentatricopeptide repeat				IPR002885
Dr00302	Pentatricopeptide repeat|Tetratricopeptide-like helical	GO:0005739		pentatricopeptide repeat-containing protein mitochondrial-like	IPR002885|IPR011990	GO:0005515
Dr00303	Amino acid transporter, transmembrane	GO:0016020		sodium-coupled neutral amino acid transporter	IPR013057
Dr00304	SCAR/WAVE family|WH2 domain				IPR028288|IPR003124	GO:0005856|GO:0030036|GO:0003779
Dr00305	Pentatricopeptide repeat|Tetratricopeptide-like helical	GO:0016020		pentatricopeptide repeat-containing protein	IPR002885|IPR011990	GO:0005515
Dr00306	DNA-binding WRKY				IPR003657	GO:0003700|GO:0006355|GO:0043565
Dr00307	Protein of unknown function DUF4228, plant				IPR025322
Dr00308	Pentatricopeptide repeat|Tetratricopeptide-like helical				IPR002885|IPR011990	GO:0005515
Dr00309	Domain of unknown function DUF399|Protein of unknown function DUF3411, plant	GO:0009507		uncharacterized protein	IPR007314|IPR021825
Dr00310	Kelch repeat type 1|Development/cell death domain|Galactose oxidase/kelch, beta-propeller|Galactose oxidase, beta-propeller	GO:0016023		kelch-like protein	IPR006652|IPR013989|IPR011043|IPR015916	GO:0005515
Dr00311	FAM175 family|FAM175 family, plant				IPR023238|IPR023241
Dr00312	DAHP synthetase, class II	GO:0033587|GO:0009611|GO:0009617|GO:0009423|GO:0003849|GO:0016829|GO:0009507|GO:0016020|GO:0000162|GO:0006571|GO:0009094	EC:2.5.1.54	2-dehydro-3-deoxyphosphoheptonate aldolase 3-deoxy-d-arabino-heptulosonate 7-phosphate synthetase	IPR002480	GO:0003849|GO:0009073	EC:2.5.1.54	KEGG: 00400+2.5.1.54|MetaCyc: PWY-6164|UniPathway: UPA00053
Dr00313	Ribosomal protein S6e|Ribosomal protein S6, eukaryotic|Ribosomal protein S6e, conserved site	GO:0005730|GO:0022626|GO:0003735|GO:0005886|GO:0040007|GO:0009507|GO:0006412|GO:0042254		protein	IPR001377|IPR014401|IPR018282	GO:0003735|GO:0005622|GO:0005840|GO:0006412
Dr00314	14-3-3 protein|14-3-3 domain|14-3-3 protein, conserved site	GO:0005773|GO:0019904|GO:0046686|GO:0005886|GO:0009507|GO:0005634|GO:0005829|GO:0048046|GO:0009742		14-3-3 protein	IPR000308|IPR023410|IPR023409	GO:0019904
Dr00315	Alcohol dehydrogenase superfamily, zinc-type|Alcohol dehydrogenase, C-terminal|Alcohol dehydrogenase GroES-like|GroES (chaperonin 10)-like|NAD(P)-binding domain|Polyketide synthase, enoylreductase|Alcohol dehydrogenase, zinc-type, conserved site	GO:0046872|GO:0016491		alcohol dehydrogenase-like protein	IPR002085|IPR013149|IPR013154|IPR011032|IPR016040|IPR020843|IPR002328	GO:0008270|GO:0016491|GO:0055114|GO:0016747
Dr00316	GTP cyclohydrolase II, RibA|3,4-dihydroxy-2-butanone 4-phosphate synthase, RibB|DHBP synthase RibB-like alpha/beta domain|Riboflavin biosynthesis protein RibBA	GO:0003935|GO:0009231|GO:0008686|GO:0009507|GO:0016020	EC:3.5.4.25|EC:4.1.99.12	riboflavin biosynthesis protein chloroplastic-like	IPR000926|IPR000422|IPR017945|IPR016299	GO:0003935|GO:0009231|GO:0008686	EC:3.5.4.25|EC:4.1.99.12|EC:3.5.4.25+4.1.99.12	KEGG: 00740+3.5.4.25|MetaCyc: PWY-6168|UniPathway: UPA00275|KEGG: 00740+4.1.99.12|MetaCyc: PWY-6167|MetaCyc: PWY-6168|UniPathway: UPA00275|KEGG: 00740+3.5.4.25+4.1.99.12|MetaCyc: PWY-6167|MetaCyc: PWY-6168|UniPathway: UPA00275|UniPathway: UPA00275
Dr00317	Homoserine dehydrogenase, catalytic|Late embryogenesis abundant protein, LEA-3|NAD(P)-binding domain|Homoserine dehydrogenase, conserved site	GO:0016491|GO:0009082|GO:0009067|GO:0000166|GO:1901607		glyceraldehyde-3-phosphate dehydrogenase-like protein	IPR001342|IPR004238|IPR016040|IPR019811	GO:0006520|GO:0055114	EC:1.1.1.3	KEGG: 00260+1.1.1.3|KEGG: 00270+1.1.1.3|KEGG: 00300+1.1.1.3|UniPathway: UPA00050|UniPathway: UPA00051
Dr00318	EAP30|Vacuolar protein sorting protein 36, GLUE domain|Winged helix-turn-helix DNA-binding domain	GO:0005488		vacuolar protein sorting-associated protein 36-like	IPR007286|IPR021648|IPR011991	GO:0032266|GO:0043130
Dr00319		GO:0043231|GO:0044444		atp binding
Dr00320	26S proteasome non-ATPase regulatory subunit Rpn12|SAC3/GANP/Nin1/mts3/eIF-3 p25	GO:0009908|GO:0051788|GO:0009941|GO:0043161|GO:0048825|GO:0031540|GO:0009647|GO:0009408|GO:0048366|GO:0048528|GO:0009735|GO:0009733|GO:0005838|GO:0043248		26s proteasome non-atpase regulatory subunit 8	IPR006746|IPR005062	GO:0005838|GO:0006508
Dr00321	Endoplasmic reticulum vesicle transporter, C-terminal	GO:0005886|GO:0005783		endoplasmic reticulum-golgi intermediate compartment protein 3-like	IPR012936
Dr00322	WD40 repeat|WD40-repeat-containing domain|WD40/YVTN repeat-like-containing domain	GO:0009524|GO:0007094|GO:0000776		mitotic checkpoint protein	IPR001680|IPR017986|IPR015943	GO:0005515
Dr00323	Fatty acid hydroxylase|Uncharacterised domain Wax2, C-terminal	GO:0010025|GO:0043668|GO:0010143|GO:0048653|GO:0003824|GO:0016020|GO:0005783		protein wax2-like	IPR006694|IPR021940	GO:0005506|GO:0006633|GO:0016491|GO:0055114
Dr00324	Fatty acid hydroxylase	GO:0010025|GO:0043668|GO:0010143|GO:0048653|GO:0003824|GO:0016020|GO:0005783		protein wax2-like	IPR006694	GO:0005506|GO:0006633|GO:0016491|GO:0055114
Dr00325	Fatty acid hydroxylase|Uncharacterised domain Wax2, C-terminal	GO:0010025|GO:0043668|GO:0010143|GO:0048653|GO:0003824|GO:0016020|GO:0005783		protein wax2-like	IPR006694|IPR021940	GO:0005506|GO:0006633|GO:0016491|GO:0055114
Dr00326	Interferon-related developmental regulator, C-terminal|Interferon-related developmental regulator, N-terminal|Armadillo-type fold|Armadillo-like helical	GO:0044424		interferon-related developmental regulator domain-containing protein	IPR006921|IPR007701|IPR016024|IPR011989	GO:0005488
Dr00327	P-type ATPase, A domain|Cation-transporting P-type ATPase, C-terminal|Cation-transporting P-type ATPase, N-terminal|HAD-like domain|Calcium-transporting P-type ATPase, N-terminal autoinhibitory domain|Cation-transporting P-type ATPase|P-type ATPase, cytoplasmic domain N|P-type ATPase, transmembrane domain|Calcium-transporting P-type ATPase, subfamily IIB|P-type ATPase, phosphorylation site	GO:0005388|GO:0005516|GO:0070588|GO:0016021|GO:0046872|GO:0005524|GO:0009706|GO:0005789|GO:0005886|GO:0016529	EC:3.6.3.8	calcium-transporting atpase plasma membrane-type-like	IPR008250|IPR006068|IPR004014|IPR023214|IPR024750|IPR023299|IPR023298|IPR001757|IPR006408|IPR018303	GO:0000166|GO:0046872|GO:0005516|GO:0006812|GO:0016021|GO:0019829|GO:0005388|GO:0005524|GO:0016020|GO:0070588
Dr00328	Eukaryotic porin/Tom40|Porin domain	GO:0031967|GO:0005739|GO:0016021|GO:0006820|GO:0015267|GO:0071944|GO:0009507		porin-like protein	IPR027246|IPR023614	GO:0005741|GO:0055085
Dr00329	Adenylylsulphate kinase|P-loop containing nucleoside triphosphate hydrolase	GO:0070814|GO:0016310|GO:0005524|GO:0032440|GO:0048232|GO:0000103|GO:0004020|GO:0055114|GO:0006144	EC:1.3.1.74|EC:2.7.1.25	adenylyl-sulfate chloroplastic-like	IPR002891|IPR027417	GO:0000103|GO:0004020|GO:0005524	EC:2.7.1.25	KEGG: 00230+2.7.1.25|KEGG: 00920+2.7.1.25|MetaCyc: PWY-5340|Reactome: REACT_13433|UniPathway: UPA00140
Dr00330		GO:0004553|GO:0005975|GO:0016023	EC:3.2.1.0	endo- -beta-xylanase a-like
Dr00331	Glycoside hydrolase, family 10|Glycoside hydrolase, superfamily|Glycoside hydrolase, catalytic domain	GO:0004553|GO:0005975|GO:0016023	EC:3.2.1.0	endo- -beta-xylanase a-like	IPR001000|IPR017853|IPR013781	GO:0004553|GO:0005975|GO:0003824		MetaCyc: PWY-6717|MetaCyc: PWY-6784
Dr00332	Surfeit locus 1/Shy1	GO:0005739|GO:0016020		surfeit locus protein 1-like	IPR002994	GO:0016020
Dr00333	Zinc finger, LIM-type	GO:0051015|GO:0051017|GO:0008270|GO:0005886		pollen-specific protein sf3	IPR001781	GO:0008270
Dr00334		GO:0009793		myosin heavy chain-related protein
Dr00335	Translation elongation factor EF1B, beta/delta subunit, guanine nucleotide exchange|Glutathione S-transferase, C-terminal-like|Translation elongation factor EF1B/ribosomal protein S6|Translation elongation factor EF1B, beta/delta chains, conserved site	GO:0044464|GO:0006412		elongation factor 1-beta	IPR014038|IPR010987|IPR014717|IPR001326	GO:0003746|GO:0005853|GO:0006414		Reactome: REACT_17015|Reactome: REACT_71
Dr00336	Xanthine/uracil/vitamin C permease	GO:0005773|GO:0005618|GO:0005886|GO:0055085|GO:0005215		nucleobase ascorbate transporter	IPR006043	GO:0005215|GO:0006810|GO:0016020|GO:0055085
Dr00337	NAC domain	GO:0016020|GO:0009536		crt homolog 1-like	IPR003441	GO:0003677|GO:0006355
Dr00338	Methyladenine glycosylase|DNA glycosylase	GO:0008725|GO:0006284	EC:3.2.2.20	dna-3-methyladenine glycosylase i	IPR005019|IPR011257	GO:0006284|GO:0008725|GO:0003824|GO:0006281		Reactome: REACT_216
Dr00339	Reticulon|Nucleotide-diphospho-sugar transferase	GO:0005783		protein	IPR003388|IPR005069
Dr00340	Proteasome component (PCI) domain|Winged helix-turn-helix DNA-binding domain	GO:0008180|GO:0000085|GO:0010388		cop9 signalosome complex subunit 4	IPR000717|IPR011991	GO:0005515
Dr00341	Carbohydrate kinase PfkB|Ribokinase|Carbohydrate/puine kinase, PfkB, conserved site	GO:0008152|GO:0005739|GO:0016772		protein	IPR011611|IPR002139|IPR002173	GO:0004747|GO:0006014|GO:0016773
Dr00342	General substrate transporter|Sugar/inositol transporter|Major facilitator superfamily domain, general substrate transporter|Major facilitator superfamily domain|Sugar transporter, conserved site	GO:0015749|GO:0015791|GO:0016491|GO:0015166|GO:0015145|GO:0005351|GO:0016020		sugar transporter	IPR005828|IPR016196|IPR003663|IPR020846|IPR005829	GO:0016021|GO:0022857|GO:0055085|GO:0016020|GO:0022891|GO:0005215|GO:0006810		Reactome: REACT_15518
Dr00343	General substrate transporter|Sugar/inositol transporter|Major facilitator superfamily domain, general substrate transporter|Major facilitator superfamily domain|Sugar transporter, conserved site	GO:0015798|GO:0005355|GO:0015797|GO:0016491|GO:0015148|GO:0005886|GO:0015795|GO:0015753|GO:0015757|GO:0015575|GO:0005354|GO:0055085|GO:0015168|GO:0015752|GO:0016021|GO:0015758|GO:0015793|GO:0005365|GO:0015576|GO:0015591		sorbitol transporter	IPR005828|IPR016196|IPR003663|IPR020846|IPR005829	GO:0016021|GO:0022857|GO:0055085|GO:0016020|GO:0022891|GO:0005215|GO:0006810		Reactome: REACT_15518
Dr00344	Signal transduction response regulator, receiver domain|Signal transduction histidine kinase EnvZ-like, dimerisation/phosphoacceptor domain|Histidine kinase-like ATPase, ATP-binding domain|CHASE|Signal transduction histidine kinase-related protein, C-terminal|Signal transduction histidine kinase, homodimeric domain|CheY-like superfamily|Signal transduction histidine kinase, core	GO:0005034|GO:0048831|GO:0016020|GO:0009414|GO:0023014|GO:0006355|GO:0009651|GO:0000155|GO:0010271|GO:0003677|GO:0010029|GO:0000160|GO:0009737|GO:0000156|GO:0005524|GO:0035556|GO:0009365|GO:0045449		histidine kinase 3	IPR001789|IPR003661|IPR003594|IPR006189|IPR009082|IPR011006|IPR004358|IPR005467	GO:0000156|GO:0000160|GO:0006355|GO:0000155|GO:0007165|GO:0016020|GO:0005524|GO:0004871|GO:0016310|GO:0016772		Reactome: REACT_14797|Reactome: REACT_1046
Dr00345	Mitochodrial transcription termination factor-related	GO:0009536		protein	IPR003690
Dr00346	DNA-binding WRKY|OST-HTH/LOTUS domain|Nucleotide-binding, alpha-beta plait|Zinc finger, CCCH-type|RNA recognition motif domain	GO:1901363|GO:0097159		rna binding	IPR003657|IPR025605|IPR012677|IPR000571|IPR000504	GO:0003700|GO:0006355|GO:0043565|GO:0000166|GO:0046872|GO:0003676
Dr00347	Oxidoreductase FAD/NAD(P)-binding|Oxidoreductase, FAD-binding domain|Flavoprotein pyridine nucleotide cytochrome reductase|Armadillo-type fold|Riboflavin synthase-like beta-barrel|Armadillo-like helical|Armadillo|Ferredoxin reductase-type FAD-binding domain	GO:0044763|GO:0016043|GO:0044424		protein	IPR001433|IPR008333|IPR016024|IPR017938|IPR011989|IPR001709|IPR000225|IPR017927	GO:0016491|GO:0055114|GO:0005488|GO:0005515
Dr00348	Zinc finger, CCHC-type|Cold-shock protein, DNA-binding|Nucleic acid-binding, OB-fold|Cold shock protein|Cold-shock conserved site	GO:0044424|GO:0003676		glycine-rich protein	IPR001878|IPR002059|IPR012340|IPR011129|IPR019844	GO:0003676|GO:0008270|GO:0003677|GO:0006355
Dr00349	Amino acid transporter, transmembrane	GO:0016021|GO:0048829|GO:0009624		auxin influx carrier component	IPR013057
Dr00350
Dr00351	Sodium/calcium exchanger membrane region|Calcium/proton exchanger CAX|Calcium/proton exchanger	GO:0055085|GO:0009628|GO:0015672|GO:0015085|GO:0005774|GO:0042221|GO:0006816|GO:0072503|GO:0006950|GO:0015297		ca2+ antiporter cation exchanger	IPR004837|IPR004798|IPR004713	GO:0016021|GO:0055085|GO:0006816|GO:0015369|GO:0006812|GO:0008324		Reactome: REACT_15518
Dr00352
Dr00353	Ribosome recycling factor|Ribosome recycling factor domain	GO:0032544|GO:0005507|GO:0042742|GO:0009658|GO:0009579|GO:0009570|GO:0009817|GO:0009790		ribosome-recycling factor	IPR002661|IPR023584	GO:0006412
Dr00354	General substrate transporter|Sugar/inositol transporter|Major facilitator superfamily domain, general substrate transporter|Major facilitator superfamily domain|Sugar transporter, conserved site	GO:0005886|GO:0055085|GO:0008643|GO:0032440|GO:0016021|GO:0005358|GO:0055114|GO:0006812	EC:1.3.1.74	hexose transporter	IPR005828|IPR016196|IPR003663|IPR020846|IPR005829	GO:0016021|GO:0022857|GO:0055085|GO:0016020|GO:0022891|GO:0005215|GO:0006810		Reactome: REACT_15518
Dr00355	General substrate transporter|Sugar/inositol transporter|Major facilitator superfamily domain, general substrate transporter|Major facilitator superfamily domain|Sugar transporter, conserved site	GO:0009679|GO:0016491|GO:0016020|GO:0006812|GO:0008645		hexose transporter	IPR005828|IPR016196|IPR003663|IPR020846|IPR005829	GO:0016021|GO:0022857|GO:0055085|GO:0016020|GO:0022891|GO:0005215|GO:0006810		Reactome: REACT_15518
Dr00356	Mycolic acid cyclopropane synthase|Sterol methyltransferase C-terminal	GO:0005773|GO:0009793|GO:0032259|GO:0003838|GO:0016126	EC:2.1.1.41	cycloartenol-c-24-methyltransferase 1	IPR003333|IPR013705	GO:0008610|GO:0006694|GO:0008168
Dr00357
Dr00358	Guanylate kinase/L-type calcium channel beta subunit|Galactose oxidase/kelch, beta-propeller|P-loop containing nucleoside triphosphate hydrolase|Kelch-type beta propeller|Guanylate kinase|Guanylate kinase-like|Guanylate kinase, conserved site	GO:0004385|GO:0016310|GO:0006163|GO:0006144	EC:2.7.4.8	guanylate kinase	IPR008145|IPR011043|IPR027417|IPR015915|IPR017665|IPR008144|IPR020590	GO:0005515|GO:0004385|GO:0006163	EC:2.7.4.8	KEGG: 00230+2.7.4.8|MetaCyc: PWY-7221
Dr00359	CCAAT-binding transcription factor, subunit B|CCAAT-binding factor, conserved site	GO:0006355|GO:0003677|GO:0016602|GO:0003700|GO:0045449		ccaat-binding transcription factor subunit b family expressed	IPR001289|IPR018362	GO:0003700|GO:0006355|GO:0003677|GO:0016602
Dr00360	Cytokinin riboside 5'-monophosphate phosphoribohydrolase LOG	GO:0005829|GO:0042803|GO:0005634|GO:0016829		protein	IPR005269
Dr00361	Nitrite/sulphite reductase 4Fe-4S domain|Nitrite/Sulfite reductase ferredoxin-like domain|Nitrite/sulphite reductase iron-sulphur/siroheam-binding site|Sulphite reductase, ferredoxin dependent	GO:0042644|GO:0005507|GO:0019424|GO:0009651|GO:0009409|GO:0009941|GO:0050311|GO:0003677|GO:0051539|GO:0016002|GO:0020037|GO:0045892|GO:0006275|GO:0006323|GO:0016020|GO:0010319|GO:0048046	EC:1.8.7.1|EC:1.8.99.1	sulfite reductase	IPR006067|IPR005117|IPR006066|IPR011787	GO:0016491|GO:0020037|GO:0051536|GO:0055114|GO:0050311|GO:0051539	EC:1.8.1.2|EC:1.8.7.1	KEGG: 00920+1.8.1.2|MetaCyc: PWY-6683|UniPathway: UPA00140|KEGG: 00920+1.8.7.1
Dr00362	GTP-binding protein TypA|Elongation factor, GTP-binding domain|Translation elongation factor EFG, V domain|Translation elongation factor EFTu/EF1A, domain 2|Translation protein, beta-barrel domain|P-loop containing nucleoside triphosphate hydrolase|Elongation factor G, III-V domain|Small GTP-binding protein domain	GO:0003746|GO:0031425|GO:0006184|GO:0009570|GO:0003924|GO:0005525|GO:0005840|GO:0006448		elongation factor family protein	IPR006298|IPR000795|IPR000640|IPR004161|IPR009000|IPR027417|IPR009022|IPR005225	GO:0005525|GO:0003924
Dr00363	Protein kinase domain|EF-hand domain pair|Protein kinase-like domain|EF-hand domain|Serine/threonine- / dual specificity protein kinase, catalytic domain|EF-Hand 1, calcium-binding site|Protein kinase, ATP binding site|Serine/threonine-protein kinase, active site	GO:0006468|GO:0005509|GO:0009651|GO:0005524|GO:0009738|GO:0005737|GO:0005634|GO:0004698|GO:0005886|GO:0009069		calcium-dependent protein kinase	IPR000719|IPR011992|IPR011009|IPR002048|IPR002290|IPR018247|IPR017441|IPR008271	GO:0004672|GO:0005524|GO:0006468|GO:0005509|GO:0016772|GO:0004674
Dr00364	DNA-binding protein SMUBP-2|P-loop containing nucleoside triphosphate hydrolase|AAA+ ATPase domain|Helicase, superfamily 1/2, ATP-binding domain|DNA helicase, putative	GO:0005524|GO:0004386|GO:0003677		dna-binding protein smubp-2-like	IPR026853|IPR027417|IPR003593|IPR014001|IPR004483	GO:0043141|GO:0000166|GO:0017111|GO:0003677|GO:0005524
Dr00365	Exostosin-like|Epidermal growth factor-like domain|EGF-like, conserved site	GO:0006164|GO:0046872|GO:0016874|GO:0016023|GO:0000166|GO:0016020		exostosin family protein	IPR004263|IPR000742|IPR013032	GO:0005515
Dr00366	RNA recognition motif domain|Nucleotide-binding, alpha-beta plait	GO:0003676|GO:0005739|GO:0000166		rna recognition motif-containing protein	IPR000504|IPR012677	GO:0003676|GO:0000166
Dr00367	Phospholipid/glycerol acyltransferase	GO:0016024|GO:0003841|GO:0016021|GO:0005783|GO:0042967	EC:2.3.1.51	1-acyl-sn-glycerol-3-phosphate acyltransferase pls1	IPR002123	GO:0008152|GO:0016746
Dr00368	Zinc finger, RING-type|Zinc finger, RING/FYVE/PHD-type	GO:0008270		e3 ubiquitin-protein ligase	IPR001841|IPR013083	GO:0005515|GO:0008270
Dr00369	GNAT domain|Acyl-CoA N-acyltransferase	GO:0008080|GO:0042967		n-acetyltransferase 9-like protein	IPR000182|IPR016181	GO:0008080
Dr00370	Protein kinase domain|Protein kinase-like domain	GO:0005524|GO:0000186|GO:0004709|GO:0007178|GO:0009069	EC:2.7.11.25	map kinase-like protein	IPR000719|IPR011009	GO:0004672|GO:0005524|GO:0006468|GO:0016772
Dr00371	Cyclin, N-terminal|Cyclin, C-terminal domain|Cyclin-like|Cyclin A/B/D/E	GO:0044763		g2 mitotic-specific cyclin s13-6	IPR006671|IPR004367|IPR013763|IPR014400	GO:0005634|GO:0000079|GO:0019901|GO:0051726		Reactome: REACT_152
Dr00372	Frigida-like				IPR012474
Dr00373	Multicopper oxidase, type 1|Multicopper oxidase, type 2|Multicopper oxidase, type 3|Cupredoxin	GO:0016491|GO:0016023		l-ascorbate oxidase homolog	IPR001117|IPR011706|IPR011707|IPR008972	GO:0016491|GO:0055114|GO:0005507
Dr00374	Plant specific eukaryotic initiation factor 4B				IPR010433
Dr00375	Bulb-type lectin domain	GO:0016023		uncharacterized protein loc100822369	IPR001480
Dr00376	tRNA-binding domain|Nucleic acid-binding, OB-fold	GO:0000049|GO:0004812|GO:0005739|GO:0009507|GO:0006418		protein	IPR002547|IPR012340	GO:0000049		Reactome: REACT_71
Dr00377		GO:0005739|GO:0005886		protein
Dr00378		GO:0009507		snrk1-interacting protein 1
Dr00379	Frigida-like				IPR012474
Dr00380	Glycoside hydrolase, family 1|Glycoside hydrolase, superfamily|Glycoside hydrolase, catalytic domain	GO:0004553|GO:0016023|GO:0005975	EC:3.2.1.0	beta-glucosidase 31-like isoform 1	IPR001360|IPR017853|IPR013781	GO:0004553|GO:0005975|GO:0003824
Dr00381	Nascent polypeptide-associated complex NAC domain				IPR002715
Dr00382	Sterile alpha motif, type 1|Mitochondrial inner membrane translocase subunit Tim17/Tim22/Tim23/peroxisomal protein PMP24|Sterile alpha motif/pointed domain	GO:0016021|GO:0009507		sam domain family protein	IPR021129|IPR003397|IPR013761
Dr00383	Ribosomal protein L10e/L16|Ribosomal protein L10e, conserved site	GO:0006412|GO:0005730|GO:0003735|GO:0009941|GO:0071493|GO:0005773|GO:0032502|GO:0022625|GO:0005886|GO:0042254		protein	IPR016180|IPR018255	GO:0003735|GO:0005840|GO:0006412|GO:0005622
Dr00384	SET domain				IPR001214	GO:0005515
Dr00385	Elongation factor, GTP-binding domain|Translation elongation factor EFTu/EF1A, C-terminal|Translation elongation factor EFTu/EF1A, domain 2|Translation protein, beta-barrel domain|Translation elongation factor EF1A/initiation factor IF2gamma, C-terminal|P-loop containing nucleoside triphosphate hydrolase	GO:0016779|GO:0005618|GO:0003746|GO:0008270|GO:0005739|GO:0050897|GO:0005524|GO:0006184|GO:0003924|GO:0046686|GO:0005525|GO:0005840|GO:0006448	EC:2.7.7.0	mitochondrial elongation factor tu	IPR000795|IPR004160|IPR004161|IPR009000|IPR009001|IPR027417	GO:0003924|GO:0005525
Dr00386
Dr00387	Nascent polypeptide-associated complex NAC domain				IPR002715
Dr00388	Zinc finger, RING/FYVE/PHD-type|Zinc finger, RING-type				IPR013083|IPR001841	GO:0005515|GO:0008270
Dr00389	Histone core|Histone H2A|Histone-fold	GO:0000786|GO:0003677|GO:0006334|GO:0046982|GO:0005634		protein	IPR007125|IPR009072|IPR002119	GO:0003677|GO:0046982|GO:0000786|GO:0005634|GO:0006334
Dr00390	Protein of unknown function DUF761, plant				IPR008480
Dr00391	RNA recognition motif domain|Nucleotide-binding, alpha-beta plait	GO:0097159|GO:1901363		rna recognition motif containing	IPR000504|IPR012677	GO:0003676|GO:0000166
Dr00392	Zinc finger, DHHC-type, palmitoyltransferase	GO:0016020|GO:0046872|GO:0016491		probable s-acyltransferase at3g26935-like	IPR001594	GO:0008270
Dr00393	Pentatricopeptide repeat|Tetratricopeptide-like helical				IPR002885|IPR011990	GO:0005515
Dr00394	Pseudouridine-5'-phosphate glycosidase	GO:0005777|GO:0016798|GO:0008152|GO:0005886		pseudouridine-5 -phosphate glycosidase	IPR007342	GO:0016798	EC:3.2.-.-	KEGG: 00240+3.2.-.-|KEGG: 00531+3.2.-.-
Dr00395	t-SNARE|Syntaxin, N-terminal domain|Target SNARE coiled-coil domain	GO:0044763		syntaxin related protein am3p	IPR010989|IPR006011|IPR000727	GO:0016020|GO:0016192|GO:0005515		Reactome: REACT_11184
Dr00396		GO:0051205|GO:0016021|GO:0005739		membrane insertion protein and with tetratricopeptide repeat domain-containing protein
Dr00397		GO:0005739|GO:0050897		uncharacterized protein mitochondrial-like
Dr00398	DNA-binding HORMA	GO:0010224|GO:0006974		mitotic spindle assembly checkpoint protein mad2b	IPR003511
Dr00399	NUDIX hydrolase domain|NUDIX hydrolase domain-like|NUDIX hydrolase, conserved site	GO:0016787		nudix hydrolase 13	IPR000086|IPR015797|IPR020084	GO:0016787
Dr00400	Ribosomal protein S27e|Zinc-binding ribosomal protein|Ribosomal protein S27e, zinc-binding domain	GO:0005730|GO:0046872|GO:0003735|GO:0005886|GO:0005618|GO:0022627|GO:0006412|GO:0042254		ribosomal protein s27	IPR000592|IPR011332|IPR023407	GO:0003735|GO:0005622|GO:0005840|GO:0006412
Dr00401	Protein kinase domain|Protein kinase-like domain|Concanavalin A-like lectin/glucanase, subgroup|Serine/threonine- / dual specificity protein kinase, catalytic domain|Protein kinase, ATP binding site|Serine/threonine-protein kinase, active site	GO:0044249|GO:0044763|GO:0004672|GO:0008610|GO:0009620|GO:0044260|GO:0016023|GO:0000166|GO:0016310|GO:0044255|GO:0016020|GO:0010033		receptor protein	IPR000719|IPR011009|IPR013320|IPR002290|IPR017441|IPR008271	GO:0004672|GO:0005524|GO:0006468|GO:0016772|GO:0004674
Dr00402	Short-chain dehydrogenase/reductase SDR|Glucose/ribitol dehydrogenase|NAD(P)-binding domain	GO:0016491|GO:0055114|GO:0000166		(+)-neomenthol dehydrogenase-like	IPR002198|IPR016040|IPR002347	GO:0008152|GO:0016491
Dr00403		GO:0016740|GO:0005773		transferring glycosyl groups
Dr00404		GO:0005886		uncharacterized protein
Dr00405	Nuclear factor related to kappa-B-binding protein				IPR024867	GO:0031011
Dr00406	Rubredoxin domain|Rubredoxin-type fold|Rubredoxin-like domain	GO:0009536		rubredoxin-like protein	IPR024935|IPR004039|IPR024934	GO:0005506
Dr00407	Exostosin-like	GO:0080116|GO:0010417|GO:0016021|GO:0000139|GO:0009834|GO:0016023		probable beta- -xylosyltransferase irx10l-like	IPR004263
Dr00408	CRAL-TRIO domain|Cellular retinaldehyde binding/alpha-tocopherol transport|CRAL/TRIO, N-terminal domain	GO:0005622|GO:0006810|GO:0005215		protein sec fourteen-like protein-20	IPR001251|IPR011074|IPR001071	GO:0005215|GO:0005622|GO:0006810
Dr00409	Glycyl-tRNA synthetase/DNA polymerase subunit gamma-2|Rieske [2Fe-2S] iron-sulphur domain|Aminoacyl-tRNA synthetase, class II (G/ H/ P/ S), conserved domain|Ubiquinol cytochrome reductase, transmembrane domain|Anticodon-binding|Glycyl-tRNA synthetase, alpha2 dimer|S15/NS1, RNA-binding|Ubiquinol-cytochrome c reductase, iron-sulphur subunit|Aminoacyl-tRNA synthetase, class II|WHEP-TRS	GO:0005739|GO:0006426|GO:0005524|GO:0046686|GO:0004820|GO:0006544|GO:0006563|GO:0006566|GO:0009345	EC:6.1.1.14	glycyl-trna synthetase	IPR027031|IPR017941|IPR002314|IPR004192|IPR004154|IPR009068|IPR002315|IPR006317|IPR006195|IPR000738	GO:0016491|GO:0051537|GO:0055114|GO:0000166|GO:0004812|GO:0005524|GO:0006418|GO:0008121|GO:0004820|GO:0005737|GO:0006426	EC:6.1.1.14|EC:1.10.2.2	KEGG: 00970+6.1.1.14|Reactome: REACT_71|KEGG: 00190+1.10.2.2|MetaCyc: PWY-3781|MetaCyc: PWY-6692|MetaCyc: PWY-7082|MetaCyc: PWY-7279
Dr00410	GDP-fucose protein O-fucosyltransferase|O-fucosyltransferase, plant	GO:0003700|GO:0003677|GO:0009536|GO:0006355|GO:0005667|GO:0045449		duf246 domain-containing protein at1g04910-like	IPR019378|IPR024709		EC:2.4.1.221	KEGG: 00514+2.4.1.221|UniPathway: UPA00378
Dr00411	Peptidase C65, otubain|Ovarian tumour, otubain	GO:0008242|GO:0006508	EC:3.4.19.0	ubiquitin thioesterase otubain-like protein	IPR019400|IPR003323
Dr00412	SET domain|SRA-YDG|Pre-SET domain|PUA-like domain|Pre-SET zinc-binding sub-group|Post-SET domain	GO:0000166|GO:0008168|GO:0016571	EC:2.1.1.0	histone-lysine n- h3 lysine-9 specific suvh4-like	IPR001214|IPR003105|IPR007728|IPR015947|IPR003606|IPR003616	GO:0005515|GO:0042393|GO:0005634|GO:0008270|GO:0018024|GO:0034968	EC:2.1.1.43	KEGG: 00310+2.1.1.43
Dr00413	DnaJ domain|Domain of unknown function DUF3444				IPR001623|IPR024593
Dr00414	Pleckstrin homology domain|Arf GTPase activating protein|BAR domain|Ankyrin repeat-containing domain|Arfaptin homology (AH) domain/BAR domain|Pleckstrin homology-like domain|Ankyrin repeat	GO:0071704|GO:0016772|GO:0007275|GO:0016023|GO:0005543|GO:0006796|GO:0043167|GO:0048856|GO:0044238		adp-ribosylation factor gtpase-activating protein agd3-like	IPR001849|IPR001164|IPR004148|IPR020683|IPR027267|IPR011993|IPR002110	GO:0005515|GO:0005543|GO:0008060|GO:0008270|GO:0032312|GO:0005737
Dr00415	NAC domain				IPR003441	GO:0003677|GO:0006355
Dr00416
Dr00417	Tetratricopeptide repeat|Tetratricopeptide-like helical|Tetratricopeptide repeat-containing domain	GO:0009536		tetratricopeptide repeat-containing protein	IPR019734|IPR011990|IPR013026	GO:0005515
Dr00418	Myb-like domain	GO:0003682|GO:0000785		protein	IPR017877
Dr00419	Putative S-adenosyl-L-methionine-dependent methyltransferase	GO:0016301|GO:0016310|GO:0008168|GO:0032259	EC:2.1.1.0	atp binding	IPR004159	GO:0008168	EC:2.1.1.-	KEGG: 00130+2.1.1.-|KEGG: 00253+2.1.1.-|KEGG: 00270+2.1.1.-|KEGG: 00340+2.1.1.-|KEGG: 00350+2.1.1.-|KEGG: 00360+2.1.1.-|KEGG: 00380+2.1.1.-|KEGG: 00450+2.1.1.-|KEGG: 00522+2.1.1.-|KEGG: 00624+2.1.1.-|KEGG: 00627+2.1.1.-|KEGG: 00860+2.1.1.-|KEGG: 00940+2.1.1.-|KEGG: 00941+2.1.1.-|KEGG: 00942+2.1.1.-|KEGG: 00945+2.1.1.-|KEGG: 00950+2.1.1.-|KEGG: 00981+2.1.1.-
Dr00420
Dr00421	Major facilitator superfamily|Ataxin-10 domain|Major facilitator superfamily domain, general substrate transporter|Armadillo-type fold|Armadillo-like helical	GO:0005774|GO:0016021|GO:0000325|GO:0055085		spx (syg1 pho81 xpr1) domain-containing	IPR011701|IPR019156|IPR016196|IPR016024|IPR011989	GO:0016021|GO:0055085|GO:0005488
Dr00422	Autophagy-related protein 13				IPR018731
Dr00423	Actin-related protein|Actin, conserved site|Actin/actin-like conserved site	GO:0005618|GO:0048767|GO:0005856|GO:0005524|GO:0005737|GO:0005634|GO:0005886		actin	IPR004000|IPR004001|IPR020902
Dr00424	Plastid lipid-associated protein/fibrillin conserved domain	GO:0010287|GO:0005198		protein	IPR006843	GO:0005198|GO:0009507
Dr00425	Ribonuclease P/MRP protein subunit	GO:0016874|GO:0005773|GO:0042823|GO:0004540|GO:0032440|GO:0008033|GO:0055114|GO:0051252	EC:1.3.1.74	protein	IPR002759	GO:0004540|GO:0008033
Dr00426	Dihydrodipicolinate reductase, bacterial/plant|Dihydrodipicolinate reductase, N-terminal|Dihydrodipicolinate reductase, C-terminal|NAD(P)-binding domain	GO:0055114|GO:0019684|GO:0016998|GO:0009089|GO:0070402|GO:0009570|GO:0008839	EC:1.3.1.26	dihydrodipicolinate reductase	IPR011770|IPR000846|IPR022663|IPR016040	GO:0008839|GO:0009089|GO:0055114|GO:0070402	EC:1.17.1.8	KEGG: 00300+1.17.1.8|MetaCyc: PWY-2941|MetaCyc: PWY-2942|MetaCyc: PWY-5097|UniPathway: UPA00034
Dr00427	Peroxisomal biogenesis factor 11	GO:0005779|GO:0016559|GO:0009507|GO:0005739		peroxisomal biogenesis factor 11 family protein	IPR008733	GO:0005779|GO:0016559
Dr00428	Ubiquitin domain|BAG domain|Ubiquitin supergroup				IPR000626|IPR003103|IPR019955	GO:0005515|GO:0051087
Dr00429	Fructosamine/Ketosamine-3-kinase|Zinc finger, RING-type|Protein kinase-like domain|Zinc finger, RING/FYVE/PHD-type	GO:0016301|GO:0016310|GO:0009507		protein kinase-like protein	IPR016477|IPR001841|IPR011009|IPR013083	GO:0005515|GO:0008270|GO:0016772
Dr00430	AP2/ERF domain|DNA-binding domain				IPR001471|IPR016177	GO:0003700|GO:0006355|GO:0003677
Dr00431	Ran binding domain|Pleckstrin homology-like domain	GO:0004519|GO:0003964|GO:0003677|GO:0006278|GO:0003723|GO:0009536|GO:0006281	EC:2.7.7.49	1 domain-containing protein	IPR000156|IPR011993	GO:0046907
Dr00432	WD40 repeat|Zinc finger, CCCH-type|G-protein beta WD-40 repeat|WD40-repeat-containing domain|WD40/YVTN repeat-like-containing domain|WD40 repeat, conserved site	GO:0003677|GO:0008270|GO:0016740		zinc finger ccch domain-containing protein 63	IPR001680|IPR000571|IPR017986|IPR015943|IPR020472|IPR019775	GO:0005515|GO:0046872
Dr00433	Pentatricopeptide repeat|Tetratricopeptide-like helical				IPR002885|IPR011990	GO:0005515
Dr00434	SPX, N-terminal|Major facilitator superfamily|Major facilitator superfamily domain, general substrate transporter	GO:0005774|GO:0016021|GO:0000325|GO:0055085		spx (syg1 pho81 xpr1) domain-containing	IPR004331|IPR011701|IPR016196	GO:0016021|GO:0055085
Dr00435	Glucose-methanol-choline oxidoreductase, N-terminal|Glucose-methanol-choline oxidoreductase, C-terminal|Glucose-methanol-choline oxidoreductase	GO:0006066|GO:0050660|GO:0016023|GO:0016829|GO:0008812|GO:0055114|GO:0006544|GO:0006563|GO:0006566	EC:1.1.99.1	protein hothead-like	IPR000172|IPR007867|IPR012132	GO:0016614|GO:0050660|GO:0055114|GO:0006066|GO:0008812	EC:1.1.99.1	KEGG: 00260+1.1.99.1|UniPathway: UPA00529
Dr00436	Ataxin-10 domain|Armadillo-type fold|Armadillo-like helical				IPR019156|IPR016024|IPR011989	GO:0005488
Dr00437	Glycoside hydrolase, family 1|Glycoside hydrolase, superfamily|Glycoside hydrolase, catalytic domain|Glycoside hydrolase, family 1, active site	GO:0004553|GO:0016023|GO:0005975	EC:3.2.1.0	bgl18_orysj ame: full=beta-glucosidase 18 short=os4bglu18 flags: precursor	IPR001360|IPR017853|IPR013781|IPR018120	GO:0004553|GO:0005975|GO:0003824
Dr00438	Glycoside hydrolase, family 1|Oxoglutarate/iron-dependent dioxygenase|Glycoside hydrolase, superfamily|Glycoside hydrolase, catalytic domain|Prolyl 4-hydroxylase, alpha subunit|Glycoside hydrolase, family 1, active site	GO:0031418|GO:0005506|GO:0016706|GO:0055114	EC:1.14.11.0	iron ion binding oxidoreductase	IPR001360|IPR005123|IPR017853|IPR013781|IPR006620|IPR018120	GO:0004553|GO:0005975|GO:0016491|GO:0016706|GO:0055114|GO:0003824|GO:0005506|GO:0016705|GO:0031418
Dr00439	Ataxin-10 domain	GO:0009793		maternal effect embryo arrest 50 protein	IPR019156
Dr00440	Glycoside hydrolase, family 1|Glycoside hydrolase, superfamily|Glycoside hydrolase, catalytic domain	GO:0043231|GO:0044444|GO:0003824		beta-glucosidase 47	IPR001360|IPR017853|IPR013781	GO:0004553|GO:0005975|GO:0003824
Dr00441
Dr00442	Glycoside hydrolase, family 1|Transposase, MuDR, plant|Glycoside hydrolase, superfamily|Glycoside hydrolase, catalytic domain	GO:1901363|GO:0097159		transposon mutator sub-class	IPR001360|IPR004332|IPR017853|IPR013781	GO:0004553|GO:0005975|GO:0003824
Dr00443	Glycoside hydrolase, family 1|Reverse transcriptase zinc-binding domain|Glycoside hydrolase, superfamily|Glycoside hydrolase, catalytic domain|Glycoside hydrolase, family 1, active site	GO:0004553|GO:0016023|GO:0005975	EC:3.2.1.0	bgl18_orysj ame: full=beta-glucosidase 18 short=os4bglu18 flags: precursor	IPR001360|IPR026960|IPR017853|IPR013781|IPR018120	GO:0004553|GO:0005975|GO:0003824
Dr00444	Alcohol dehydrogenase superfamily, zinc-type|Alcohol dehydrogenase GroES-like|GroES (chaperonin 10)-like|NAD(P)-binding domain|Polyketide synthase, enoylreductase	GO:0005488|GO:0016491|GO:0009536		quinone oxidoreductase-like protein	IPR002085|IPR013154|IPR011032|IPR016040|IPR020843	GO:0008270|GO:0016491|GO:0055114|GO:0016747
Dr00445	Glutathione S-transferase, N-terminal|Glutathione S-transferase, C-terminal-like|Thioredoxin-like fold	GO:0050896|GO:0016740		glutathione s-transferase	IPR004045|IPR010987|IPR012336	GO:0005515
Dr00446	Exostosin-like	GO:0003676|GO:0016740|GO:0009536|GO:0005739		xyloglucan galactosyltransferase	IPR004263
Dr00447	Iron sulphur-containing domain, CDGSH-type|Iron sulphur-containing domain, CDGSH-type, subfamily	GO:0009507		protein	IPR018967|IPR006622	GO:0043231|GO:0051537
Dr00448	FAS1 domain	GO:0016023|GO:0005886		fasciclin-like arabinogalactan protein 8-like	IPR000782
Dr00449	Ankyrin repeat|Aminotransferase, class I/classII|Voltage-dependent anion channel|Ankyrin repeat-containing domain|Pyridoxal phosphate-dependent transferase|Pyridoxal phosphate-dependent transferase, major region, subdomain 1|Pyridoxal phosphate-dependent transferase, major region, subdomain 2|Zinc finger, C2H2|Aminotransferases, class-I, pyridoxal-phosphate-binding site	GO:0008793|GO:0010035|GO:0044763|GO:0004069|GO:0008509|GO:0048878|GO:0006820|GO:0019899|GO:1901700|GO:0016847|GO:0030170|GO:0016020|GO:0010033|GO:0000162|GO:0006571|GO:0009094|GO:0009821|GO:0006107|GO:0006522|GO:0006525|GO:0006531|GO:0006534|GO:0006536|GO:0006560|GO:0015976|GO:0006519	EC:2.6.1.57|EC:2.6.1.1|EC:4.4.1.14	1-aminocyclopropane-1-carboxylate synthase	IPR002110|IPR004839|IPR004695|IPR020683|IPR015424|IPR015421|IPR015422|IPR007087|IPR004838	GO:0005515|GO:0009058|GO:0030170|GO:0016021|GO:0055085|GO:0003824|GO:0046872		Reactome: REACT_13
Dr00450	Aspartate/glutamate/uridylate kinase|ACT domain|Aspartate kinase domain|Aspartate kinase, conserved site	GO:0009089|GO:0004072|GO:0016310|GO:0016597|GO:0005739|GO:0006544|GO:0006563|GO:0006566	EC:2.7.2.4	precursor monofunctional aspartokinase	IPR001048|IPR002912|IPR001341|IPR018042	GO:0008152|GO:0016597|GO:0004072|GO:0008652	EC:2.7.2.4	Reactome: REACT_13|KEGG: 00260+2.7.2.4|KEGG: 00270+2.7.2.4|KEGG: 00300+2.7.2.4|MetaCyc: PWY-2941|MetaCyc: PWY-2942|MetaCyc: PWY-5097|MetaCyc: PWY-6559|MetaCyc: PWY-6562|MetaCyc: PWY-7153|UniPathway: UPA00034|UniPathway: UPA00050|UniPathway: UPA00051
Dr00451
Dr00452
Dr00453
Dr00454
Dr00455	U box domain|Armadillo-type fold|Armadillo-like helical|Zinc finger, RING/FYVE/PHD-type				IPR003613|IPR016024|IPR011989|IPR013083	GO:0000151|GO:0004842|GO:0016567|GO:0005488
Dr00456	Callose synthase|Glycosyl transferase, family 48	GO:0055047|GO:0009846|GO:0009556|GO:0006075|GO:0080092|GO:0000148|GO:0003843|GO:0052543|GO:0005739|GO:0005982|GO:0005985	EC:2.4.1.34	callose synthase	IPR026953|IPR003440	GO:0003843|GO:0000148|GO:0006075|GO:0016020	EC:2.4.1.34	KEGG: 00500+2.4.1.34|MetaCyc: PWY-6773
Dr00457	DnaJ domain				IPR001623
Dr00458	Plastid lipid-associated protein/fibrillin conserved domain	GO:0016020|GO:0009507		probable plastid-lipid-associated protein chloroplastic-like	IPR006843	GO:0005198|GO:0009507
Dr00459	Quinolinate phosphoribosyl transferase, C-terminal|Quinolinate phosphoribosyl transferase, N-terminal|Aldolase-type TIM barrel|Nicotinate-nucleotide pyrophosphorylase	GO:0004514|GO:0009507|GO:0009435|GO:0046497	EC:2.4.2.19	quinolinate phoshoribosyltransferase	IPR002638|IPR022412|IPR013785|IPR004393	GO:0004514|GO:0009435|GO:0016763|GO:0003824|GO:0019363	EC:6.3.4.21|EC:2.4.2.19	KEGG: 00760+6.3.4.21|MetaCyc: PWY-5381|Reactome: REACT_11193|UniPathway: UPA00253|KEGG: 00760+2.4.2.19|MetaCyc: PWY-5316|MetaCyc: PWY-5653|UniPathway: UPA00253
Dr00460	SANT/Myb domain|Pentatricopeptide repeat|Homeodomain-like|Myb domain, plants|Myb domain	GO:0044464|GO:0016020		pentatricopeptide repeat-containing protein	IPR001005|IPR002885|IPR009057|IPR006447|IPR017930	GO:0003682|GO:0003677
Dr00461	Regulator of chromosome condensation, RCC1|FYVE zinc finger|Brevis radix (BRX) domain|Transcription factor BREVIS RADIX, N-terminal domain|Regulator of chromosome condensation 1/beta-lactamase-inhibitor protein II|Zinc finger, FYVE/PHD-type|Pleckstrin homology-like domain|Zinc finger, RING/FYVE/PHD-type|Zinc finger, FYVE-related				IPR000408|IPR000306|IPR013591|IPR027988|IPR009091|IPR011011|IPR011993|IPR013083|IPR017455	GO:0046872
Dr00462
Dr00463	DNA polymerase delta/II small subunit family|DNA polymerase alpha/epsilon, subunit B	GO:0003887|GO:0006260|GO:0003677|GO:0005634|GO:0042575	EC:2.7.7.7	dna polymerase delta small subunit	IPR024826|IPR007185	GO:0003677|GO:0003887|GO:0006260	EC:2.7.7.7	KEGG: 00230+2.7.7.7|KEGG: 00240+2.7.7.7|Reactome: REACT_152|Reactome: REACT_22172|Reactome: REACT_383
Dr00464	Protein kinase domain|EF-hand domain pair|Protein kinase-like domain|EF-hand domain|Serine/threonine- / dual specificity protein kinase, catalytic domain|EF-Hand 1, calcium-binding site|Protein kinase, ATP binding site|Serine/threonine-protein kinase, active site	GO:0005829|GO:0006468|GO:0005509|GO:0010359|GO:0010119|GO:0004713|GO:0005524|GO:0009738|GO:0004683|GO:0005886|GO:0009069	EC:2.7.10.0|EC:2.7.11.17	calcium-dependent protein kinase	IPR000719|IPR011992|IPR011009|IPR002048|IPR002290|IPR018247|IPR017441|IPR008271	GO:0004672|GO:0005524|GO:0006468|GO:0005509|GO:0016772|GO:0004674
Dr00465	Peptidase C1A, papain|Peptidase C1A, papain C-terminal|Proteinase inhibitor I29, cathepsin propeptide|Cysteine peptidase, histidine active site|Cysteine peptidase, asparagine active site	GO:0008233|GO:0050896|GO:0016491|GO:0008152		cysteine proteinase	IPR013128|IPR000668|IPR013201|IPR025660|IPR025661	GO:0008234|GO:0006508
Dr00466	Domain of unknown function DUF239				IPR004314
Dr00467	Geminivirus AL3 coat protein	GO:0016032		replication enhancer protein	IPR000657	GO:0016032
Dr00468	Peptidase C1A, papain|Peptidase C1A, papain C-terminal|Proteinase inhibitor I29, cathepsin propeptide|Cysteine peptidase, cysteine active site|Cysteine peptidase, histidine active site|Cysteine peptidase, asparagine active site	GO:0008233|GO:0050896|GO:0016491|GO:0008152		cysteine proteinase	IPR013128|IPR000668|IPR013201|IPR000169|IPR025660|IPR025661	GO:0008234|GO:0006508
Dr00469	Peptidase C1A, papain|Peptidase C1A, papain C-terminal|Proteinase inhibitor I29, cathepsin propeptide|Cysteine peptidase, cysteine active site|Cysteine peptidase, histidine active site|Cysteine peptidase, asparagine active site	GO:0008233|GO:0050896|GO:0016491|GO:0016023|GO:0008152		cysteine proteinase	IPR013128|IPR000668|IPR013201|IPR000169|IPR025660|IPR025661	GO:0008234|GO:0006508
Dr00470	Tyrosinase|Polyphenol oxidase, central domain|Polyphenol oxidase, C-terminal|Zinc finger, RING-type|Uncharacterised domain, di-copper centre|Zinc finger, RING/FYVE/PHD-type|Hemocyanin/hexamerin	GO:0016491|GO:0044424		polyphenol oxidase	IPR002227|IPR022739|IPR022740|IPR001841|IPR008922|IPR013083|IPR013788	GO:0008152|GO:0016491|GO:0004097|GO:0055114|GO:0005515|GO:0008270	EC:1.10.3.1	KEGG: 00350+1.10.3.1|KEGG: 00950+1.10.3.1|MetaCyc: PWY-5349|MetaCyc: PWY-6752
Dr00471
Dr00472	Integrator complex subunit 9|Beta-Casp domain				IPR027074|IPR022712	GO:0016180|GO:0032039
Dr00473	NUDIX hydrolase domain|NUDIX hydrolase domain-like	GO:0009611|GO:0000210|GO:0009536|GO:0006769|GO:0046497	EC:3.6.1.22	mutt domain	IPR000086|IPR015797	GO:0016787
Dr00474	Zinc finger, DHHC-type, palmitoyltransferase	GO:0016023|GO:0016020		probable s-acyltransferase at4g15080-like isoform 1	IPR001594	GO:0008270
Dr00475	Auxin efflux carrier	GO:0016020		auxin efflux carrier-like protein	IPR004776	GO:0016021|GO:0055085
Dr00476		GO:0044763|GO:0016567|GO:0005488		histone ubiquitination proteins group
Dr00477
Dr00478	NADH:ubiquinone oxidoreductase, B18 subunit	GO:0008137|GO:0005747|GO:0009536|GO:0006120|GO:0006744|GO:0006814|GO:0015992	EC:1.6.5.3	nadh dehydrogenase	IPR008698	GO:0003954|GO:0005739|GO:0008137
Dr00479
Dr00480	Argonaute/Dicer protein, PAZ domain|Stem cell self-renewal protein Piwi|Domain of unknown function DUF1785|Argonaut, glycine-rich domain|Ribonuclease H-like domain	GO:0003743|GO:0005829|GO:0009850|GO:0048830|GO:0035198|GO:0009616|GO:0009965|GO:0004521|GO:0009733|GO:0035197|GO:0010218|GO:0005634|GO:0009793|GO:0035195|GO:0016246|GO:0005840|GO:0006446|GO:0051252		protein argonaute 1-like	IPR003100|IPR003165|IPR014811|IPR024357|IPR012337	GO:0005515|GO:0003676		Reactome: REACT_12472
Dr00481	Pentatricopeptide repeat				IPR002885
Dr00482	Zinc finger, C2H2|Zinc finger C2H2-type/integrase DNA-binding domain|Zinc finger, C2H2-like	GO:0005488		indeterminate-related protein 1	IPR007087|IPR013087|IPR015880	GO:0046872|GO:0003676
Dr00483	SNF2-related|Helicase, C-terminal|P-loop containing nucleoside triphosphate hydrolase|Helicase, superfamily 1/2, ATP-binding domain	GO:0016020|GO:0005524|GO:0004386|GO:0003677|GO:0016740		snf2 family dna-dependent atpase	IPR000330|IPR001650|IPR027417|IPR014001	GO:0003677|GO:0005524|GO:0003676|GO:0004386
Dr00484
Dr00485	AMP-dependent synthetase/ligase|AMP-binding enzyme C-terminal domain|AMP-binding, conserved site	GO:0018858|GO:0019761|GO:0018874	EC:6.2.1.25	acyl:coa ligase acetate-coa synthetase-like protein	IPR000873|IPR025110|IPR020845	GO:0003824|GO:0008152
Dr00486	AMP-dependent synthetase/ligase	GO:0018858|GO:0019761|GO:0018874	EC:6.2.1.25	acyl:coa ligase acetate-coa synthetase-like protein	IPR000873	GO:0003824|GO:0008152
Dr00487	Myc-type, basic helix-loop-helix (bHLH) domain	GO:0046983|GO:0005634|GO:0009536		bhlh transcription factor-like protein	IPR011598	GO:0046983
Dr00488
Dr00489	Small GTPase superfamily|P-loop containing nucleoside triphosphate hydrolase|Small GTPase superfamily, Ras type|Small GTPase superfamily, Rho type|Small GTPase superfamily, Rab type|Ran GTPase|Small GTP-binding protein domain	GO:0005768|GO:0005525|GO:0005886|GO:0007264|GO:0015031		gtp binding protein	IPR001806|IPR027417|IPR020849|IPR003578|IPR003579|IPR002041|IPR005225	GO:0005525|GO:0007264|GO:0003924|GO:0006184|GO:0007165|GO:0016020|GO:0005622|GO:0015031|GO:0006886|GO:0006913		Reactome: REACT_11044
Dr00490	Beta-catenin-like protein 1, N-terminal|Armadillo-type fold|Armadillo-like helical				IPR013180|IPR016024|IPR011989	GO:0005488
Dr00491	Nucleoporin protein Ndc1-Nup	GO:0016020		uncharacterized protein	IPR019049
Dr00492	Probable transposase, Ptta/En/Spm, plant				IPR004252
Dr00493	Alcohol dehydrogenase superfamily, zinc-type|Alcohol dehydrogenase, C-terminal|GroES (chaperonin 10)-like|NAD(P)-binding domain	GO:0000166|GO:0055114|GO:0048037|GO:0016616|GO:0008270	EC:1.1.1.0	probable cinnamyl alcohol dehydrogenase 1-like	IPR002085|IPR013149|IPR011032|IPR016040	GO:0008270|GO:0016491|GO:0055114
Dr00494	Alcohol dehydrogenase superfamily, zinc-type|Alcohol dehydrogenase, C-terminal|Alcohol dehydrogenase GroES-like|GroES (chaperonin 10)-like|NAD(P)-binding domain|Polyketide synthase, enoylreductase|Alcohol dehydrogenase, zinc-type, conserved site|D-isomer specific 2-hydroxyacid dehydrogenase, NAD-binding	GO:0009699|GO:0046872|GO:0016616	EC:1.1.1.0	cinnamyl alcohol dehydrogenase	IPR002085|IPR013149|IPR013154|IPR011032|IPR016040|IPR020843|IPR002328|IPR006140	GO:0008270|GO:0016491|GO:0055114|GO:0016747|GO:0016616|GO:0048037
Dr00495
Dr00496	Alcohol dehydrogenase superfamily, zinc-type|Alcohol dehydrogenase, C-terminal|NAD(P)-binding domain|D-isomer specific 2-hydroxyacid dehydrogenase, NAD-binding	GO:0000166|GO:0055114|GO:0048037|GO:0008270|GO:0016616	EC:1.1.1.0	probable cinnamyl alcohol dehydrogenase 1-like	IPR002085|IPR013149|IPR016040|IPR006140	GO:0008270|GO:0016491|GO:0055114|GO:0016616|GO:0048037
Dr00497	Alcohol dehydrogenase superfamily, zinc-type|Alcohol dehydrogenase GroES-like|GroES (chaperonin 10)-like|Alcohol dehydrogenase, zinc-type, conserved site	GO:0009699|GO:0016616|GO:0048037|GO:0008270|GO:0000166|GO:0055114	EC:1.1.1.0	cinnamyl alcohol dehydrogenase	IPR002085|IPR013154|IPR011032|IPR002328	GO:0008270|GO:0016491|GO:0055114
Dr00498	Aminotransferase-like, plant mobile domain				IPR019557
Dr00499	Endonuclease/exonuclease/phosphatase|EF-hand domain pair	GO:0004527|GO:0004519|GO:0009409|GO:0005509|GO:0006096|GO:0004365|GO:0005634|GO:0006094	EC:1.2.1.12	uncharacterized calcium-binding protein at1g02270-like	IPR005135|IPR011992	GO:0005509
Dr00500	Heavy metal-associated domain, HMA	GO:0030001|GO:0046872		heavy metal transport detoxification domain-containing protein	IPR006121	GO:0030001|GO:0046872
Dr00501	Heavy metal-associated domain, HMA	GO:0030001|GO:0046872		copper transport protein atox1-like protein	IPR006121	GO:0030001|GO:0046872
Dr00502
Dr00503	Haem peroxidase, plant/fungal/bacterial|Plant peroxidase|Haem peroxidase|Peroxidases heam-ligand binding site|Peroxidase, active site	GO:0005488|GO:0006979|GO:0016491|GO:0016023|GO:0008152|GO:0005739		peroxidase 5-like isoform 1	IPR002016|IPR010255|IPR000823|IPR019793|IPR019794	GO:0004601|GO:0006979|GO:0020037|GO:0055114	EC:1.11.1.7	KEGG: 00360+1.11.1.7|KEGG: 00940+1.11.1.7|MetaCyc: PWY-5461|MetaCyc: PWY-7214
Dr00504	Haem peroxidase, plant/fungal/bacterial|Haem peroxidase				IPR002016|IPR010255	GO:0004601|GO:0006979|GO:0020037|GO:0055114
Dr00505	Haem peroxidase, plant/fungal/bacterial|Plant peroxidase|Haem peroxidase|Peroxidase, active site	GO:0005488|GO:0006979|GO:0016491|GO:0016023|GO:0008152		peroxidase	IPR002016|IPR010255|IPR000823|IPR019794	GO:0004601|GO:0006979|GO:0020037|GO:0055114	EC:1.11.1.7	KEGG: 00360+1.11.1.7|KEGG: 00940+1.11.1.7|MetaCyc: PWY-5461|MetaCyc: PWY-7214
Dr00506
Dr00507	Probable transposase, Ptta/En/Spm, plant				IPR004252
Dr00508	Nascent polypeptide-associated complex subunit alpha|Ubiquitin-associated domain/translation elongation factor EF-Ts, N-terminal|Nascent polypeptide-associated complex NAC domain				IPR016641|IPR000449|IPR002715	GO:0005515
Dr00509	Protein kinase domain|Protein kinase-like domain|Protein kinase, ATP binding site	GO:0016301		protein	IPR000719|IPR011009|IPR017441	GO:0004672|GO:0005524|GO:0006468|GO:0016772
Dr00510	Oxoglutarate/iron-dependent dioxygenase|Non-haem dioxygenase N-terminal domain|Isopenicillin N synthase-like	GO:0045486|GO:0005506|GO:0055114|GO:0009813	EC:1.14.11.9	protein	IPR005123|IPR026992|IPR027443	GO:0016491|GO:0016706|GO:0055114
Dr00511	Oxoglutarate/iron-dependent dioxygenase|Non-haem dioxygenase N-terminal domain|Isopenicillin N synthase-like	GO:0045486|GO:0005506|GO:0055114|GO:0009813	EC:1.14.11.9	protein	IPR005123|IPR026992|IPR027443	GO:0016491|GO:0016706|GO:0055114
Dr00512
Dr00513	Oxoglutarate/iron-dependent dioxygenase|Isopenicillin N synthase-like	GO:0045486|GO:0005506|GO:0055114|GO:0009813	EC:1.14.11.9	protein	IPR005123|IPR027443	GO:0016491|GO:0016706|GO:0055114
Dr00514	Peptidase M1, alanine aminopeptidase/leukotriene A4 hydrolase	GO:0070011		puromycin-sensitive aminopeptidase	IPR001930	GO:0006508
Dr00515	Oxoglutarate/iron-dependent dioxygenase|Non-haem dioxygenase N-terminal domain|Isopenicillin N synthase-like	GO:0051707|GO:0016706	EC:1.14.11.0	-oxoglutarate 3-dioxygenase-like	IPR005123|IPR026992|IPR027443	GO:0016491|GO:0016706|GO:0055114
Dr00516	Peptidase C48, SUMO/Sentrin/Ubl1				IPR003653	GO:0006508|GO:0008234
Dr00517
Dr00518
Dr00519	Zinc finger, RING-type|Zinc finger, RING/FYVE/PHD-type				IPR001841|IPR013083	GO:0005515|GO:0008270
Dr00520	Zinc finger, RING-type|Zinc finger, RING/FYVE/PHD-type	GO:0016023|GO:0046872		ring-h2 finger protein atl2l	IPR001841|IPR013083	GO:0005515|GO:0008270
Dr00521	Transcription factor, MADS-box|Transcription factor, K-box	GO:0006351|GO:0005488		mads-box protein	IPR002100|IPR002487	GO:0003677|GO:0046983|GO:0003700|GO:0005634|GO:0006355		Reactome: REACT_21303
Dr00522	Transcription factor, MADS-box|Transcription factor, K-box	GO:0048731|GO:0006355|GO:0050793|GO:0003677|GO:0003700|GO:0005667|GO:0045449		soc1-like protein	IPR002100|IPR002487	GO:0003677|GO:0046983|GO:0003700|GO:0005634|GO:0006355		Reactome: REACT_21303
Dr00523	Protein of unknown function DUF1191				IPR010605
Dr00524
Dr00525	RNA recognition motif domain|Nucleotide-binding, alpha-beta plait	GO:0003676|GO:0000166		protein	IPR000504|IPR012677	GO:0003676|GO:0000166
Dr00526	WD40 repeat|WD40-repeat-containing domain|WD40/YVTN repeat-like-containing domain|WD40 repeat, conserved site	GO:0032877|GO:0016049|GO:0010091|GO:0005737|GO:0005634		cell cycle switch protein ccs52a	IPR001680|IPR017986|IPR015943|IPR019775	GO:0005515
Dr00527
Dr00528	Peptidase C48, SUMO/Sentrin/Ubl1				IPR003653	GO:0006508|GO:0008234
Dr00529
Dr00530	Ribosome biogenesis protein BMS1/TSR1, C-terminal	GO:0006184|GO:0042254|GO:0003924|GO:0005634|GO:0005525		ribosome biogenesis protein bms1 homolog	IPR007034
Dr00531	ELK|KNOX1|KNOX2|Homeobox KN domain|Homeodomain-like|Homeobox domain	GO:0003700|GO:0043565|GO:0010089|GO:0006355|GO:0005667|GO:0045449		homeobox protein knotted-1-like protein	IPR005539|IPR005540|IPR005541|IPR008422|IPR009057|IPR001356	GO:0003677|GO:0005634|GO:0006355|GO:0003700|GO:0043565
Dr00532	Expansin|Expansin, cellulose-binding-like domain|RlpA-like double-psi beta-barrel domain|Expansin/Lol pI|Barwin-like endoglucanase|Expansin/pollen allergen, DPBB domain	GO:0005576|GO:0016020|GO:0009664|GO:0016023|GO:0005618		alpha-expansin 7	IPR002963|IPR007117|IPR009009|IPR014733|IPR007118|IPR007112	GO:0009664|GO:0005576
Dr00533	NAD-dependent epimerase/dehydratase|NAD(P)-binding domain	GO:0048040|GO:0042732|GO:0016023|GO:0005886|GO:0050662|GO:0000166|GO:0005982|GO:0005985|GO:0009117	EC:4.1.1.35	udp-glucuronic acid decarboxylase	IPR001509|IPR016040	GO:0003824|GO:0044237|GO:0050662
Dr00534
Dr00535
Dr00536	Uncharacterised protein family Cys-rich	GO:0005886		plac8-like protein	IPR006461
Dr00537	BTB/POZ fold|BTB/POZ-like	GO:0009536		protein	IPR011333|IPR000210	GO:0005515
Dr00538	Thioredoxin-like fold|Glutaredoxin	GO:0048451|GO:0051537|GO:0009867|GO:0046872|GO:0045454|GO:0009055|GO:0009863|GO:0048653|GO:0048448|GO:0005737|GO:0005634|GO:0015035|GO:0006118		grx_c8 - glutaredoxin subgroup iii	IPR012336|IPR002109	GO:0009055|GO:0015035|GO:0045454
Dr00539	Protein kinase domain|Protein kinase-like domain|Serine/threonine- / dual specificity protein kinase, catalytic domain|Serine/threonine-protein kinase, active site	GO:0044260|GO:0016310|GO:0004672|GO:0005739		protein	IPR000719|IPR011009|IPR002290|IPR008271	GO:0004672|GO:0005524|GO:0006468|GO:0016772|GO:0004674
Dr00540
Dr00541	Protein of unknown function DUF604				IPR006740
Dr00542	Mechanosensitive ion channel MscS|Like-Sm (LSM) domain|Mechanosensitive ion channel MscS, transmembrane-2	GO:0005739|GO:0009507		mechanosensitive ion channel domain-containing protein	IPR006685|IPR010920|IPR011014	GO:0016020|GO:0055085
Dr00543	Ferric reductase transmembrane component-like domain|FAD-binding 8|Ferric reductase, NAD binding|Riboflavin synthase-like beta-barrel|Ferredoxin reductase-type FAD-binding domain	GO:0044699|GO:0016491|GO:0016020		ferric-chelate reductase	IPR013130|IPR013112|IPR013121|IPR017938|IPR017927	GO:0016491|GO:0055114
Dr00544	Ferric reductase transmembrane component-like domain|FAD-binding 8|Ferric reductase, NAD binding|Cytochrome b245, heavy chain|Riboflavin synthase-like beta-barrel|Ferredoxin reductase-type FAD-binding domain	GO:0044765|GO:0016491|GO:0055072|GO:0044464|GO:0016020		ferric reduction oxidase 2	IPR013130|IPR013112|IPR013121|IPR017938|IPR000778|IPR017927	GO:0016491|GO:0055114|GO:0016020
Dr00545	Terpene synthase, N-terminal domain|Terpene synthase, metal-binding domain|Terpenoid cyclases/protein prenyltransferase alpha-alpha toroid|Terpenoid synthase|Ribonuclease H-like domain	GO:0016838	EC:4.2.3.0	a chain structure of a three-domain sesquiterpene synthase: a prospective target for advanced biofuels production	IPR001906|IPR005630|IPR008930|IPR008949|IPR012337	GO:0008152|GO:0010333|GO:0016829|GO:0000287|GO:0003676
Dr00546	Serine-threonine/tyrosine-protein kinase catalytic domain|Malectin|Protein kinase-like domain|Concanavalin A-like lectin/glucanase, subgroup|Serine/threonine- / dual specificity protein kinase, catalytic domain|Protein kinase domain|Protein kinase, ATP binding site|Serine/threonine-protein kinase, active site	GO:0009987|GO:0016772|GO:0043231|GO:0044699|GO:0044444		kinase-like protein	IPR001245|IPR021720|IPR011009|IPR013320|IPR002290|IPR000719|IPR017441|IPR008271	GO:0004672|GO:0006468|GO:0016772|GO:0005524|GO:0004674
Dr00547	Serine-threonine/tyrosine-protein kinase catalytic domain|Malectin-like carbohydrate-binding domain|Protein kinase-like domain|Concanavalin A-like lectin/glucanase, subgroup|Serine/threonine- / dual specificity protein kinase, catalytic domain|Protein kinase domain|Protein kinase, ATP binding site|Serine/threonine-protein kinase, active site	GO:0009987|GO:0004672|GO:0044699|GO:0016023		protein	IPR001245|IPR024788|IPR011009|IPR013320|IPR002290|IPR000719|IPR017441|IPR008271	GO:0004672|GO:0006468|GO:0016772|GO:0005524|GO:0004674
Dr00548	Protein kinase domain|Serine-threonine/tyrosine-protein kinase catalytic domain|Protein kinase-like domain|Concanavalin A-like lectin/glucanase, subgroup|Serine/threonine- / dual specificity protein kinase, catalytic domain|Protein kinase, ATP binding site|Serine/threonine-protein kinase, active site	GO:0006468|GO:0004674|GO:0009741|GO:0005524|GO:0050794|GO:0009826|GO:0009069	EC:2.7.11.0	kinase-like protein	IPR000719|IPR001245|IPR011009|IPR013320|IPR002290|IPR017441|IPR008271	GO:0004672|GO:0005524|GO:0006468|GO:0016772|GO:0004674
Dr00549
Dr00550	Malectin|Protein kinase-like domain|Protein kinase, ATP binding site	GO:0009987|GO:0016772		receptor-like protein kinase	IPR021720|IPR011009|IPR017441	GO:0016772|GO:0005524
Dr00551		GO:0009536		nuclear transport factor 2 family protein
Dr00552	Glycoside hydrolase, family 28|Pectin lyase fold/virulence factor|Pectin lyase fold	GO:0005576|GO:0016021|GO:0004650|GO:0005618|GO:0005982|GO:0005985	EC:3.2.1.15	probable polygalacturonase-like	IPR000743|IPR011050|IPR012334	GO:0004650|GO:0005975
Dr00553	Protein of unknown function DUF2358	GO:0009536		nuclear transport factor 2 family protein	IPR018790
Dr00554	Pentatricopeptide repeat|Tetratricopeptide-like helical				IPR002885|IPR011990	GO:0005515
Dr00555
Dr00556	Myb/SANT-like domain	GO:0009536		uncharacterized protein loc100831507	IPR024752
Dr00557	CAAX prenyl protease 1|Peptidase M48	GO:0005789|GO:0046872|GO:0005773|GO:0004222|GO:0016023|GO:0071586|GO:0016021|GO:0006508	EC:3.4.24.0	caax prenyl protease	IPR027057|IPR001915	GO:0008233|GO:0071586|GO:0004222|GO:0006508|GO:0016020	EC:3.4.24.84	KEGG: 00900+3.4.24.84
Dr00558	Nucleolar complex protein 2				IPR005343
Dr00559	DNA-directed RNA polymerase, subunit 2|DNA-directed RNA polymerase, subunit 2, domain 6|RNA polymerase Rpb2, domain 7|RNA polymerase Rpb2, domain 2|RNA polymerase, beta subunit, protrusion|RNA polymerase Rpb2, domain 3|RNA polymerase I, Rpa2 specific|RNA polymerase Rpb2, OB-fold|RNA polymerase, beta subunit, conserved site	GO:0003899|GO:0006351|GO:0003677|GO:0032549|GO:0005730|GO:0006144|GO:0006206	EC:2.7.7.6	dna-directed rna polymerase i subunit rpa2	IPR015712|IPR007120|IPR007641|IPR007642|IPR007644|IPR007645|IPR009674|IPR014724|IPR007121	GO:0003899|GO:0006351|GO:0032549|GO:0003677|GO:0005634	EC:2.7.7.6	KEGG: 00230+2.7.7.6|KEGG: 00240+2.7.7.6|Reactome: REACT_1788|KEGG: 00230+2.7.7.6|KEGG: 00240+2.7.7.6
Dr00560	Cytokinin riboside 5'-monophosphate phosphoribohydrolase LOG	GO:0005634|GO:0005829		cytokinin riboside 5 -monophosphate phosphoribohydrolase log3-like	IPR005269
Dr00561	Short-chain dehydrogenase/reductase SDR|Glucose/ribitol dehydrogenase|NAD(P)-binding domain|Light-dependent protochlorophyllide reductase	GO:0055114|GO:0003959|GO:0015995|GO:0009941|GO:0016630|GO:0052690|GO:0018548|GO:0009535|GO:0000166|GO:0009723|GO:0006118|GO:0019685	EC:1.6.99.1|EC:1.3.1.33	nadph:protochlorophyllide oxidoreductase a	IPR002198|IPR016040|IPR002347|IPR005979	GO:0008152|GO:0016491|GO:0016630|GO:0055114	EC:1.3.1.33	KEGG: 00860+1.3.1.33|UniPathway: UPA00668
Dr00562	WD40 repeat|G-protein beta WD-40 repeat|WD40-repeat-containing domain|WD40/YVTN repeat-like-containing domain				IPR001680|IPR017986|IPR015943|IPR020472	GO:0005515
Dr00563	Double-stranded RNA-binding domain|NLI interacting factor|HAD-like domain				IPR014720|IPR004274|IPR023214	GO:0005515
Dr00564
Dr00565	BolA protein|Fe-S metabolism associated domain, SufE-like	GO:0009536		protein	IPR002634|IPR003808			UniPathway: UPA00266
Dr00566	Cytokinin riboside 5'-monophosphate phosphoribohydrolase LOG	GO:0044424		protein	IPR005269
Dr00567	Ubiquitin domain|SWAP/Surp|Pre-mRNA splicing factor PRP21-like protein|Ubiquitin supergroup				IPR000626|IPR000061|IPR022030|IPR019955	GO:0005515|GO:0003723|GO:0006396
Dr00568
Dr00569	Ubiquitin carboxyl-terminal hydrolases family 2|Alpha/beta hydrolase fold-1|Epoxide hydrolase-like|P-loop containing nucleoside triphosphate hydrolase	GO:0016740		epoxide hydrolase 2-like	IPR001394|IPR027417|IPR000073|IPR000639	GO:0004221|GO:0006511|GO:0003824
Dr00570	Domain of unknown function DUF4283				IPR025558
Dr00571	Pre-mRNA-processing factor 6/Prp1|PRP1 splicing factor, N-terminal|Tetratricopeptide-like helical|Tetratricopeptide repeat|RNA-processing protein, HAT helix|Tetratricopeptide repeat-containing domain	GO:0009568|GO:0009409|GO:0000398|GO:0019252|GO:0005634		pre-mrna splicing factor	IPR027108|IPR010491|IPR011990|IPR019734|IPR003107|IPR013026	GO:0000398|GO:0005634|GO:0005515|GO:0005622|GO:0006396
Dr00572	Domain of unknown function DUF382|PSP, proline-rich	GO:0005634|GO:0009536		splicing factor 3b subunit 2	IPR007180|IPR006568	GO:0005634
Dr00573	Serine-threonine/tyrosine-protein kinase catalytic domain|Protein kinase-like domain|Concanavalin A-like lectin/glucanase, subgroup|Serine/threonine- / dual specificity protein kinase, catalytic domain|Protein kinase domain|Protein kinase, ATP binding site|Serine/threonine-protein kinase, active site	GO:0006468|GO:0005524|GO:0004674|GO:0009069	EC:2.7.11.0	probable lrr receptor-like serine threonine-protein kinase at1g56140-like	IPR001245|IPR011009|IPR013320|IPR002290|IPR000719|IPR017441|IPR008271	GO:0004672|GO:0006468|GO:0016772|GO:0005524|GO:0004674
Dr00574		GO:0006970|GO:0032922|GO:0048586|GO:0009631|GO:0005634|GO:0009536		sensitive to freezing 6 protein
Dr00575	Expansin, cellulose-binding-like domain|RlpA-like double-psi beta-barrel domain|Major pollen allergen Lol pI|Expansin/Lol pI|Barwin-like endoglucanase|Expansin/pollen allergen, DPBB domain	GO:0005576|GO:0016020|GO:0016023|GO:0019953|GO:0006949|GO:0005618		beta-expansin 3 precursor	IPR007117|IPR009009|IPR014733|IPR005795|IPR007118|IPR007112	GO:0005576|GO:0019953
Dr00576	Zinc finger, C3HC4 RING-type|Zinc finger, RING/FYVE/PHD-type|Zinc finger, RING-type|Zinc finger, RING-type, conserved site	GO:0008270		rna-binding protein	IPR018957|IPR013083|IPR001841|IPR017907	GO:0046872|GO:0005515|GO:0008270
Dr00577		GO:0016020		tetraspanin family protein
Dr00578	Zinc finger, SWIM-type|Zinc finger, PMZ-type	GO:0009536		protein far1-related sequence 6-like	IPR007527|IPR006564	GO:0008270
Dr00579	Drug/metabolite transporter	GO:0016020		auxin-induced protein 5ng4	IPR000620	GO:0016020
Dr00580	Metal-dependent hydrolase, composite domain|Allantoinase	GO:0000256|GO:0004038|GO:0050897|GO:0016023|GO:0010136|GO:0008270|GO:0005783|GO:0006995|GO:0006144	EC:3.5.2.5	probable allantoinase 1-like	IPR011059|IPR017593	GO:0016810|GO:0000256|GO:0004038|GO:0008270|GO:0050897	EC:3.5.2.5	KEGG: 00230+3.5.2.5|MetaCyc: PWY-5697|MetaCyc: PWY-5698|UniPathway: UPA00395
Dr00581	Ribosomal protein S18	GO:0005840|GO:0003735|GO:0006412|GO:0005739|GO:0042254		structural constituent of	IPR001648	GO:0003735|GO:0005622|GO:0005840|GO:0006412
Dr00582	Pentatricopeptide repeat				IPR002885
Dr00583	CAAX amino terminal protease				IPR003675	GO:0016020
Dr00584
Dr00585	DNA/RNA helicase, DEAD/DEAH box type, N-terminal|Helicase, C-terminal|P-loop containing nucleoside triphosphate hydrolase|Helicase, superfamily 1/2, ATP-binding domain|RNA helicase, DEAD-box type, Q motif|RNA helicase, ATP-dependent, DEAD-box, conserved site	GO:0005737|GO:0008380|GO:0008026|GO:0003723|GO:0006397|GO:0005524|GO:0005634		dead-box atp-dependent rna helicase	IPR011545|IPR001650|IPR027417|IPR014001|IPR014014|IPR000629	GO:0003676|GO:0005524|GO:0008026|GO:0004386
Dr00586	Protein of unknown function DUF724|Agenet-like domain|Tudor-like, plant				IPR007930|IPR008395|IPR014002
Dr00587
Dr00588
Dr00589	Pentatricopeptide repeat|Tetratricopeptide-like helical	GO:0005739		pentatricopeptide repeat-containing	IPR002885|IPR011990	GO:0005515
Dr00590	Pentatricopeptide repeat|Tetratricopeptide-like helical	GO:0005739		pentatricopeptide repeat-containing	IPR002885|IPR011990	GO:0005515
Dr00591	Oligopeptide transporter, OPT superfamily	GO:0016021|GO:0005886|GO:0055085		yellow stripe-like transporter 12	IPR004813	GO:0055085
Dr00592	Ribosomal protein S17|Nucleic acid-binding, OB-fold|Ribosomal protein S17, bacterial-type	GO:0005840|GO:0003735|GO:0006412|GO:0042254		30s ribosomal protein s17	IPR000266|IPR012340|IPR019984	GO:0003735|GO:0005622|GO:0005840|GO:0006412
Dr00593
Dr00594
Dr00595
Dr00596	Protein of unknown function DUF247, plant				IPR004158
Dr00597	NB-ARC|P-loop containing nucleoside triphosphate hydrolase				IPR002182|IPR027417	GO:0043531
Dr00598	B-block binding subunit of TFIIIC|Winged helix-turn-helix DNA-binding domain				IPR007309|IPR011991
Dr00599	Pentatricopeptide repeat|Tetratricopeptide-like helical	GO:0005739		pentatricopeptide repeat-containing protein	IPR002885|IPR011990	GO:0005515
Dr00600
Dr00601	UDP-glucuronosyl/UDP-glucosyltransferase	GO:0016757		udp-glycosyltransferase 83a1	IPR002213	GO:0008152|GO:0016758
Dr00602	P-loop containing nucleoside triphosphate hydrolase				IPR027417
Dr00603
Dr00604	Adenosylhomocysteinase	GO:0005507|GO:0004013|GO:0006730|GO:0016441|GO:0000166|GO:0006346|GO:0005773|GO:0005886|GO:0006555	EC:3.3.1.1	s-adenosyl-l-homocysteine hydrolase	IPR000043	GO:0004013|GO:0006730	EC:3.3.1.1	KEGG: 00270+3.3.1.1|MetaCyc: PWY-5041|UniPathway: UPA00314
Dr00605	OB-fold nucleic acid binding domain, AA-tRNA synthetase-type|Replication protein A, C-terminal|Nucleic acid-binding, OB-fold|Winged helix-turn-helix DNA-binding domain|Replication protein A, subunit RPA32	GO:0005515|GO:0009536		replication protein a2	IPR004365|IPR014892|IPR012340|IPR011991|IPR014646	GO:0003676		Reactome: REACT_152|Reactome: REACT_383
Dr00606	Pentatricopeptide repeat				IPR002885
Dr00607	K Homology domain, type 1	GO:0097159|GO:1901363		protein binding	IPR004088	GO:0003723
Dr00608
Dr00609	KIP1-like				IPR011684
Dr00610
Dr00611		GO:0016798		alpha-amylase isozyme 3d
Dr00612	UDP-glucuronosyl/UDP-glucosyltransferase	GO:0016740		udp-glycosyltransferase 83a1	IPR002213	GO:0008152|GO:0016758
Dr00613
Dr00614	NB-ARC|Leucine rich repeat 4|Disease resistance protein|P-loop containing nucleoside triphosphate hydrolase|Leucine-rich repeat, typical subtype	GO:0000166		nb-arc domain containing protein	IPR002182|IPR025875|IPR027417|IPR000767|IPR003591	GO:0043531|GO:0006952
Dr00615	Pleckstrin homology domain|Arf GTPase activating protein|Ankyrin repeat-containing domain|Arfaptin homology (AH) domain/BAR domain|Pleckstrin homology-like domain|Ankyrin repeat	GO:0071704|GO:0005543|GO:0006796|GO:0043167|GO:0005737|GO:0044238		adp-ribosylation factor gtpase-activating protein agd2-like	IPR001849|IPR001164|IPR020683|IPR027267|IPR011993|IPR002110	GO:0005515|GO:0005543|GO:0008060|GO:0008270|GO:0032312
Dr00616
Dr00617	Rhodanese-like domain	GO:0009536		rhodanese homology domain-containing protein	IPR001763
Dr00618	Signal transduction response regulator, receiver domain|CheY-like superfamily	GO:0000160|GO:0000156|GO:0009735|GO:0006355|GO:0044424|GO:0045449		response regulator	IPR001789|IPR011006	GO:0000156|GO:0000160|GO:0006355		Reactome: REACT_14797
Dr00619	Protein of unknown function DUF3755				IPR022228
Dr00620	Ribosomal protein L25/L23|Ribosomal protein L23/L25, N-terminal|Ribosomal protein L23/L15e core domain|Nucleotide-binding, alpha-beta plait|Ribosomal protein L23|Ribosomal protein L23/L25, conserved site	GO:0006412|GO:0006979|GO:0005618|GO:0005730|GO:0009409|GO:0019843|GO:0003735|GO:0000166|GO:0009644|GO:0022626|GO:0016020|GO:0042254		60s ribosomal protein l23a-like	IPR013025|IPR005633|IPR012678|IPR012677|IPR019985|IPR001014	GO:0003735|GO:0005840|GO:0006412|GO:0005622|GO:0000166
Dr00621	Transferase|Chloramphenicol acetyltransferase-like domain	GO:0016746		hydroxycinnamoyl-coenzyme a shikimate quinate hydroxycinnamoyltransferase	IPR003480|IPR023213	GO:0016747
Dr00622		GO:0046686|GO:0005886|GO:0005618|GO:0005524|GO:0032440|GO:0009408|GO:0055114	EC:1.3.1.74	97 kda heat shock protein
Dr00623
Dr00624
Dr00625	Gnk2-homologous domain|Serine-threonine/tyrosine-protein kinase catalytic domain|Protein kinase-like domain|Concanavalin A-like lectin/glucanase, subgroup|Serine/threonine- / dual specificity protein kinase, catalytic domain|Protein kinase domain|Protein kinase, ATP binding site|Serine/threonine-protein kinase, active site	GO:0006468|GO:0004674|GO:0016023|GO:0000166|GO:0009069	EC:2.7.11.0	cysteine-rich receptor-like protein kinase 2-like	IPR002902|IPR001245|IPR011009|IPR013320|IPR002290|IPR000719|IPR017441|IPR008271	GO:0004672|GO:0006468|GO:0016772|GO:0005524|GO:0004674
Dr00626		GO:0016799|GO:0016829|GO:0005634|GO:0005829|GO:0009691	EC:3.2.2.0	cytokinin riboside 5 -monophosphate phosphoribohydrolase log3
Dr00627
Dr00628	Cytochrome P450|Cytochrome P450, E-class, group I|Cytochrome P450, conserved site	GO:0046872|GO:0016705|GO:0004497		isoflavone 2 -hydroxylase-like	IPR001128|IPR002401|IPR017972	GO:0005506|GO:0016705|GO:0020037|GO:0055114		Reactome: REACT_13433
Dr00629	Cytochrome P450|Cytochrome P450, E-class, group I|Cytochrome P450, conserved site	GO:0009987|GO:0006952|GO:0005488|GO:0044710|GO:0016491		cytochrome p450	IPR001128|IPR002401|IPR017972	GO:0005506|GO:0016705|GO:0020037|GO:0055114		Reactome: REACT_13433
Dr00630	Cytochrome b5-like heme/steroid binding domain				IPR001199	GO:0020037
Dr00631	Protein phosphatase 2C|Protein phosphatase 2C (PP2C)-like domain|Protein phosphatase 2C, manganese/magnesium aspartate binding site	GO:0004722|GO:0006470|GO:0008270|GO:0005739|GO:0008287		probable protein phosphatase 2c 63-like	IPR015655|IPR001932|IPR000222	GO:0003824|GO:0004722|GO:0006470
Dr00632	Zinc finger, RING-type|Zinc finger, RING/FYVE/PHD-type				IPR001841|IPR013083	GO:0005515|GO:0008270
Dr00633	Uncharacterised protein family Ycf36				IPR009631
Dr00634		GO:0031418|GO:0016023|GO:0005506|GO:0004656|GO:0016702|GO:0055114|GO:0006525|GO:0006560|GO:0018401	EC:1.14.11.2|EC:1.13.11.0	prolyl 4-hydroxylase subunit alpha-1
Dr00635	Transcription initiation factor TFIID component TAF4|RST domain of plant C-terminal|Histone-fold				IPR007900|IPR022003|IPR009072	GO:0005669|GO:0006352|GO:0046982		Reactome: REACT_1788|Reactome: REACT_6185|Reactome: REACT_71
Dr00636	Mpv17/PMP22	GO:0016021		peroxisomal membrane 22 kda (mpv17 pmp22) family protein	IPR007248	GO:0016021
Dr00637
Dr00638	BTB/POZ|NPH3 domain|BTB/POZ fold|BTB/POZ-like				IPR013069|IPR027356|IPR011333|IPR000210	GO:0005515		UniPathway: UPA00143
Dr00639
Dr00640	Histone deacetylase superfamily|Zinc finger, UBP-type|Zinc finger, RING/FYVE/PHD-type	GO:0008270		histone deacetylase	IPR000286|IPR001607|IPR013083	GO:0008270
Dr00641
Dr00642	Protein of unknown function DUF566				IPR007573
Dr00643	Lateral organ boundaries, LOB				IPR004883
Dr00644	Protein kinase domain|Protein kinase-like domain|Serine/threonine- / dual specificity protein kinase, catalytic domain|Protein kinase, ATP binding site|Serine/threonine-protein kinase, active site	GO:0004674|GO:0044260|GO:0009536|GO:0000166|GO:0016310|GO:0009069	EC:2.7.11.0	casein kinase ii alpha subunit	IPR000719|IPR011009|IPR002290|IPR017441|IPR008271	GO:0004672|GO:0005524|GO:0006468|GO:0016772|GO:0004674
Dr00645	GNAT domain|Acyl-CoA N-acyltransferase	GO:0044699|GO:0050896		probable n-acetyltransferase hookless 1	IPR000182|IPR016181	GO:0008080
Dr00646	Fructose-1,6-bisphosphatase class 1/Sedoheputulose-1,7-bisphosphatase|Fructose-1,6-bisphosphatase	GO:0042132|GO:0009507|GO:0006000|GO:0006013|GO:0006094|GO:0006096|GO:0006098|GO:0015976	EC:3.1.3.11	fructose- - chloroplastic-like	IPR000146|IPR028343	GO:0005975|GO:0042132|GO:0042578	EC:3.1.3.11	KEGG: 00010+3.1.3.11|KEGG: 00030+3.1.3.11|KEGG: 00051+3.1.3.11|KEGG: 00680+3.1.3.11|KEGG: 00710+3.1.3.11|MetaCyc: PWY-5484|Reactome: REACT_474|UniPathway: UPA00138|KEGG: 00010+3.1.3.11|KEGG: 00030+3.1.3.11|KEGG: 00051+3.1.3.11|KEGG: 00680+3.1.3.11|KEGG: 00710+3.1.3.11|MetaCyc: PWY-5484|UniPathway: UPA00138
Dr00647	Vacuolar protein sorting 55	GO:0016020|GO:0016023|GO:0005773		vacuolar protein sorting-associated protein 55-like protein	IPR007262
Dr00648	Uncharacterised protein family UPF0503				IPR008004
Dr00649	Expansin, cellulose-binding-like domain|RlpA-like double-psi beta-barrel domain|Expansin/Lol pI|Barwin-like endoglucanase|Expansin/pollen allergen, DPBB domain	GO:0005576|GO:0016023		major pollen allergen ory s 1	IPR007117|IPR009009|IPR014733|IPR007118|IPR007112	GO:0005576
Dr00650	PIG-P	GO:0009536|GO:0016757		phosphatidylinositol n-acetylglucosaminyltransferase subunit p-like	IPR013717		EC:2.4.1.198	KEGG: 00563+2.4.1.198|UniPathway: UPA00196
Dr00651	Ribosomal RNA small subunit methyltransferase H|S-adenosyl-L-methionine-dependent methyltransferase, MraW, recognition domain	GO:0005739|GO:0016740		ribosomal rna small subunit methyltransferase h-like	IPR002903|IPR023397	GO:0008168
Dr00652	Pectinesterase, catalytic|Pectin lyase fold/virulence factor|Pectin lyase fold|Pectinesterase, active site	GO:0042545|GO:0005618|GO:0030599|GO:0045488|GO:0045330|GO:0005739|GO:0005982|GO:0005985	EC:3.1.1.11	pectinesterase	IPR000070|IPR011050|IPR012334|IPR018040	GO:0005618|GO:0030599|GO:0042545	EC:3.1.1.11	KEGG: 00040+3.1.1.11|KEGG: 00500+3.1.1.11|MetaCyc: PWY-1081|MetaCyc: PWY-7243|MetaCyc: PWY-7246|MetaCyc: PWY-7248|UniPathway: UPA00545
Dr00653	GDP-fucose protein O-fucosyltransferase|O-fucosyltransferase, plant	GO:0005739		duf246 domain-containing protein at1g04910-like	IPR019378|IPR024709		EC:2.4.1.221	KEGG: 00514+2.4.1.221|UniPathway: UPA00378
Dr00654	Cleavage/polyadenylation specificity factor, A subunit, C-terminal|Quinonprotein alcohol dehydrogenase-like superfamily|WD40/YVTN repeat-like-containing domain	GO:0003676|GO:0005634|GO:0009507		protein	IPR004871|IPR011047|IPR015943	GO:0003676|GO:0005634|GO:0005515
Dr00655	CS domain|HSP20-like chaperone	GO:0006457|GO:0009880|GO:0005737|GO:0009408		nuclear migration protein nudc	IPR007052|IPR008978
Dr00656	Mitochondrial substrate/solute carrier|Mitochondrial carrier protein|Mitochondrial carrier domain	GO:0006810|GO:0016020		mitochondrial uncoupling protein	IPR018108|IPR023395|IPR002067	GO:0055085
Dr00657
Dr00658	NAC domain				IPR003441	GO:0003677|GO:0006355
Dr00659		GO:0016021|GO:0006812|GO:0055085|GO:0015299|GO:0006885		cation proton exchanger
Dr00660		GO:0016020|GO:0006810		cation proton exchanger
Dr00661	Cation/H+ exchanger	GO:0044765|GO:0016020		cation proton exchanger	IPR006153	GO:0006812|GO:0015299|GO:0016021|GO:0055085
Dr00662	Translation elongation factor EFTs/EF1B|Ribosomal protein S1, RNA-binding domain|Ubiquitin-associated domain/translation elongation factor EF-Ts, N-terminal|Translation elongation factor EFTs/EF1B, dimerisation|UBA-like|Nucleic acid-binding, OB-fold|RNA-binding domain, S1|Translation elongation factor Ts, conserved site	GO:0003746|GO:0044434|GO:0005840|GO:0006448		protein	IPR001816|IPR003029|IPR000449|IPR014039|IPR009060|IPR012340|IPR022967|IPR018101	GO:0003746|GO:0005622|GO:0006414|GO:0003723|GO:0005515
Dr00663	Zinc finger, RanBP2-type|Nucleotide-binding, alpha-beta plait	GO:0003676|GO:0000166		rrm-containing rna-binding	IPR001876|IPR012677	GO:0008270|GO:0000166
Dr00664	RNA recognition motif domain|Nucleotide-binding, alpha-beta plait	GO:0043484|GO:0003676|GO:0006417|GO:0000932|GO:0000166|GO:0009846|GO:0005634		polypyrimidine tract-binding	IPR000504|IPR012677	GO:0003676|GO:0000166
Dr00665	GDP-fucose protein O-fucosyltransferase|O-fucosyltransferase, plant	GO:0006511		duf246 domain-containing protein at1g04910-like	IPR019378|IPR024709		EC:2.4.1.221	KEGG: 00514+2.4.1.221|UniPathway: UPA00378
Dr00666	Mitochodrial transcription termination factor-related	GO:0044699		mterf domain containing identical	IPR003690
Dr00667
Dr00668	Protein of unknown function DUF947	GO:0042254		uncharacterized protein	IPR009292
Dr00669	SANT/Myb domain|MYB-CC type transcription factor, LHEQLE-containing domain|Homeodomain-like|Myb domain, plants|Myb domain	GO:0005739|GO:0005488		myb-related protein 1	IPR001005|IPR025756|IPR009057|IPR006447|IPR017930	GO:0003682|GO:0003677
Dr00670		GO:0016020|GO:0005794|GO:0016757		glucomannan 4-beta-mannosyltransferase 9-like
Dr00671
Dr00672	Lipase, GDSL|SGNH hydrolase-type esterase domain	GO:0016788|GO:0016023|GO:0006629		gdsl esterase lipase at1g74460-like	IPR001087|IPR013831	GO:0006629|GO:0016788|GO:0016787
Dr00673	Pyridine nucleotide-disulphide oxidoreductase, FAD/NAD(P)-binding domain|Aromatic-ring hydroxylase-like|NAD(P)-binding domain|Geranylgeranyl reductase, plant/prokaryotic|Geranylgeranyl reductase, plant/cyanobacteria|Geranylgeranyl reductase family	GO:0055114|GO:0033385|GO:0033521|GO:0016628|GO:0010189|GO:0015995|GO:0009941|GO:0009535|GO:0000166|GO:0015979|GO:0045550	EC:1.3.1.0	geranylgeranyl reductase	IPR023753|IPR016040|IPR003042|IPR010253|IPR011774|IPR011777	GO:0016491|GO:0055114|GO:0008152|GO:0015979|GO:0015995|GO:0045550|GO:0051188|GO:0016628	EC:1.3.1.83	KEGG: 00900+1.3.1.83|UniPathway: UPA00668|UniPathway: UPA00940
Dr00674	ATPase, AAA-type, core|Peptidase M41|P-loop containing nucleoside triphosphate hydrolase|AAA+ ATPase domain|Peptidase, FtsH|ATPase, AAA-type, conserved site	GO:0031977|GO:0008270|GO:0016021|GO:0009941|GO:0010304|GO:0051301|GO:0010027|GO:0004222|GO:0006508|GO:0005524|GO:0008568|GO:0042981|GO:0009535|GO:0010205	EC:3.4.24.0|EC:3.6.4.3	cell division protein	IPR003959|IPR000642|IPR027417|IPR003593|IPR005936|IPR003960	GO:0005524|GO:0004222|GO:0006508|GO:0000166|GO:0017111|GO:0016020
Dr00675	Protein of unknown function DUF3675|Zinc finger, RING-CH-type|Zinc finger, RING/FYVE/PHD-type				IPR022143|IPR011016|IPR013083	GO:0008270	EC:6.3.2.-	KEGG: 00300+6.3.2.-|KEGG: 00380+6.3.2.-|UniPathway: UPA00143
Dr00676
Dr00677	CAAX amino terminal protease	GO:0016020|GO:0006508|GO:0009536|GO:0008233		prenyl-dependent caax	IPR003675	GO:0016020
Dr00678	NAC domain	GO:0006355|GO:0003677		protein fez-like	IPR003441	GO:0003677|GO:0006355
Dr00679	Ribosomal protein L34Ae|Protein of unknown function DUF1666	GO:0005622		60s ribosomal protein	IPR008195|IPR012870	GO:0003735|GO:0005622|GO:0005840|GO:0006412
Dr00680
Dr00681	Gibberellin regulated protein	GO:0009739|GO:0045454		gibberellin induced protein	IPR003854
Dr00682	ZF-HD homeobox protein, Cys/His-rich dimerisation domain|Homeodomain-like|Homeodomain, ZF-HD class				IPR006456|IPR009057|IPR006455	GO:0003677
Dr00683	Pentatricopeptide repeat				IPR002885
Dr00684	PDZ domain|Peptidase S1C|Trypsin-like cysteine/serine peptidase domain	GO:0010206|GO:0004252|GO:0009543|GO:0032440|GO:0006508|GO:0055114	EC:3.4.21.0|EC:1.3.1.74	protease do-like 8	IPR001478|IPR009003|IPR001940	GO:0005515|GO:0003824|GO:0004252|GO:0006508
Dr00685	Putative S-adenosyl-L-methionine-dependent methyltransferase	GO:0016301|GO:0016020|GO:0005794|GO:0016310|GO:0032259|GO:0008168	EC:2.1.1.0	probable methyltransferase pmt2-like	IPR004159	GO:0008168	EC:2.1.1.-	KEGG: 00130+2.1.1.-|KEGG: 00253+2.1.1.-|KEGG: 00270+2.1.1.-|KEGG: 00340+2.1.1.-|KEGG: 00350+2.1.1.-|KEGG: 00360+2.1.1.-|KEGG: 00380+2.1.1.-|KEGG: 00450+2.1.1.-|KEGG: 00522+2.1.1.-|KEGG: 00624+2.1.1.-|KEGG: 00627+2.1.1.-|KEGG: 00860+2.1.1.-|KEGG: 00940+2.1.1.-|KEGG: 00941+2.1.1.-|KEGG: 00942+2.1.1.-|KEGG: 00945+2.1.1.-|KEGG: 00950+2.1.1.-|KEGG: 00981+2.1.1.-
Dr00686	Fatty acid hydroxylase	GO:0044249|GO:0008610|GO:0016491|GO:0016023|GO:0006665|GO:0016020		protein sur2	IPR006694	GO:0005506|GO:0006633|GO:0016491|GO:0055114
Dr00687	Endonuclease/exonuclease/phosphatase				IPR005135
Dr00688	3-Oxoacyl-[acyl-carrier-protein (ACP)] synthase III C-terminal|3-Oxoacyl-[acyl-carrier-protein (ACP)] synthase III|Thiolase-like|Thiolase-like, subgroup|3-oxoacyl-[acyl-carrier-protein] synthase 3	GO:0004315|GO:0006633|GO:0005835|GO:0042967	EC:2.3.1.41	3-oxoacyl-synthase iii	IPR013747|IPR013751|IPR016039|IPR016038|IPR004655	GO:0008610|GO:0016747|GO:0004315|GO:0006633|GO:0003824|GO:0008152	EC:2.3.1.180	KEGG: 00061+2.3.1.180|MetaCyc: PWY-4381|MetaCyc: PWY-6519|UniPathway: UPA00094
Dr00689	Domain of unknown function DUF2428, death-receptor-like	GO:0005739		thyroid adenoma-associated protein homolog	IPR019442
Dr00690	Protein of unknown function DUF616				IPR006852
Dr00691	AP2/ERF domain|DNA-binding domain	GO:0005739|GO:0006355|GO:0003677|GO:0003700|GO:0005667|GO:0045449		ovule development protein aintegumenta -like	IPR001471|IPR016177	GO:0003700|GO:0006355|GO:0003677
Dr00692	ABC transporter-like|ABC transporter, transmembrane domain|P-loop containing nucleoside triphosphate hydrolase|ABC transporter type 1, transmembrane domain|AAA+ ATPase domain|ABC transporter, conserved site	GO:0010218|GO:0010541|GO:0016023|GO:0043190|GO:0009958|GO:0009624|GO:0016021|GO:0043481|GO:0010329|GO:0009640|GO:0010540|GO:0008361|GO:0048527|GO:0009637|GO:0010315|GO:0008559|GO:0006200|GO:0005886|GO:0005524|GO:0048443|GO:0006855	EC:3.6.3.44	abc transporter b family member 19-like	IPR003439|IPR001140|IPR027417|IPR011527|IPR003593|IPR017871	GO:0005524|GO:0016887|GO:0006810|GO:0016021|GO:0042626|GO:0055085|GO:0000166|GO:0017111
Dr00693	DNA-directed RNA polymerase, subunit 2|DNA-directed RNA polymerase, subunit 2, domain 6|RNA polymerase Rpb2, domain 7|RNA polymerase Rpb2, domain 2|RNA polymerase, beta subunit, protrusion|RNA polymerase Rpb2, domain 3|RNA polymerase Rpb2, domain 4|RNA polymerase Rpb2, domain 5|RNA polymerase Rpb2, OB-fold|RNA polymerase, beta subunit, conserved site	GO:0003899|GO:0000418|GO:0003677|GO:0005720|GO:0032549|GO:0030422|GO:0006351|GO:0006306|GO:0016020|GO:0005730|GO:0006144|GO:0006206	EC:2.7.7.6	dna-directed rna polymerase d subunit 2a-like	IPR015712|IPR007120|IPR007641|IPR007642|IPR007644|IPR007645|IPR007646|IPR007647|IPR014724|IPR007121	GO:0003899|GO:0006351|GO:0032549|GO:0003677	EC:2.7.7.6	KEGG: 00230+2.7.7.6|KEGG: 00240+2.7.7.6|Reactome: REACT_1788
Dr00694	ABC transporter-like|P-loop containing nucleoside triphosphate hydrolase|AAA+ ATPase domain|ABC transporter, conserved site	GO:0009536|GO:0006200|GO:0005524|GO:0016887|GO:0009624	EC:3.6.1.3	abc transporter family protein	IPR003439|IPR027417|IPR003593|IPR017871	GO:0005524|GO:0016887|GO:0000166|GO:0017111
Dr00695	UbiB domain|Protein kinase-like domain|Protein kinase domain	GO:0010287|GO:0004672|GO:0006468|GO:0005524		uncharacterized aarf domain-containing protein kinase chloroplastic-like	IPR004147|IPR011009|IPR000719	GO:0016772|GO:0004672|GO:0005524|GO:0006468
Dr00696	Multicopper oxidase, type 1|Multicopper oxidase, type 2|Cupredoxin|Multicopper oxidase, copper-binding site				IPR001117|IPR011706|IPR008972|IPR002355	GO:0016491|GO:0055114|GO:0005507
Dr00697	Exocyst complex component Sec6	GO:0009846|GO:0005886|GO:0006887|GO:0000145|GO:0005829|GO:0009860		protein sec6	IPR010326	GO:0000145|GO:0006887
Dr00698	Protein kinase domain|Leucine-rich repeat|Leucine-rich repeat-containing N-terminal, type 2|Protein kinase-like domain|Concanavalin A-like lectin/glucanase, subgroup|Serine/threonine- / dual specificity protein kinase, catalytic domain|Protein kinase, ATP binding site|Serine/threonine-protein kinase, active site	GO:0016023|GO:0006468|GO:0005524|GO:0016021|GO:0004674|GO:0005739|GO:0009069	EC:2.7.11.0	somatic embryogenesis receptor kinase	IPR000719|IPR001611|IPR013210|IPR011009|IPR013320|IPR002290|IPR017441|IPR008271	GO:0004672|GO:0005524|GO:0006468|GO:0005515|GO:0016772|GO:0004674
Dr00699	UbiB domain|Protein kinase-like domain	GO:0016772|GO:0009941		uncharacterized protein sll1770-like	IPR004147|IPR011009	GO:0016772
Dr00700	Leucine-rich repeat|Serine-threonine/tyrosine-protein kinase catalytic domain|Leucine-rich repeat-containing N-terminal, type 2|Leucine rich repeat 4|Protein kinase-like domain|Serine/threonine- / dual specificity protein kinase, catalytic domain|Protein kinase domain|Serine/threonine-protein kinase, active site	GO:0016301|GO:0016023|GO:0016310|GO:0016020|GO:0000166		inactive receptor kinase	IPR001611|IPR001245|IPR013210|IPR025875|IPR011009|IPR002290|IPR000719|IPR008271	GO:0005515|GO:0004672|GO:0006468|GO:0016772|GO:0005524|GO:0004674
Dr00701	Domain of unknown function DUF292, eukaryotic				IPR005061
Dr00702	Zinc finger, RING-CH-type|Zinc finger, RING/FYVE/PHD-type	GO:0008270|GO:0016020		ring fyve phd zinc finger-containing protein	IPR011016|IPR013083	GO:0008270	EC:6.3.2.-	KEGG: 00300+6.3.2.-|KEGG: 00380+6.3.2.-|UniPathway: UPA00143
Dr00703	Basic-leucine zipper domain|Transcription factor TGA like domain	GO:0009862|GO:0042742|GO:0006355|GO:0043565|GO:0003700|GO:0005667|GO:0045449		transcription factor tga1	IPR004827|IPR025422	GO:0003700|GO:0006355|GO:0043565|GO:0006351
Dr00704	DNA/pantothenate metabolism flavoprotein, C-terminal	GO:0016874		phosphopantothenate-cysteine ligase	IPR007085		EC:6.3.2.5	KEGG: 00770+6.3.2.5|UniPathway: UPA00241
Dr00705	DNA-directed DNA polymerase, family A, palm domain|3'-5' exonuclease domain|DNA polymerase A|Ribonuclease H-like domain	GO:0003887|GO:0006260|GO:0003677|GO:0008408|GO:0009295|GO:0009507|GO:0005739|GO:0042575	EC:2.7.7.7	dna polymerase	IPR001098|IPR002562|IPR012337|IPR002298	GO:0003677|GO:0003887|GO:0006260|GO:0003676|GO:0006139|GO:0008408	EC:2.7.7.7	KEGG: 00230+2.7.7.7|KEGG: 00240+2.7.7.7
Dr00706	Glutaredoxin|DEP domain|Domain of unknown function DUF547|Thioredoxin-like fold|Winged helix-turn-helix DNA-binding domain	GO:0035556		vacuolar membrane-associated protein iml1	IPR002109|IPR000591|IPR006869|IPR012336|IPR011991	GO:0009055|GO:0015035|GO:0045454|GO:0035556
Dr00707	Transcription factor, MADS-box	GO:0055114|GO:0006355|GO:0003677|GO:0009555|GO:0046983|GO:0003700|GO:0032440|GO:0005667|GO:0045449	EC:1.3.1.74	mads-box protein agl66	IPR002100	GO:0003677|GO:0046983		Reactome: REACT_21303
Dr00708	Short-chain dehydrogenase/reductase SDR|Glucose/ribitol dehydrogenase|NAD(P)-binding domain|Short-chain dehydrogenase/reductase, conserved site	GO:0016491|GO:0055114|GO:0000166		short-chain dehydrogenase reductase family protein	IPR002198|IPR016040|IPR002347|IPR020904	GO:0008152|GO:0016491
Dr00709	RNA polymerase II-binding domain|ENTH/VHS|CID domain				IPR006903|IPR008942|IPR006569
Dr00710	SAP domain|Nucleotide-binding, alpha-beta plait	GO:0044444		apoptotic chromatin condensation inducer in the nucleus	IPR003034|IPR012677	GO:0003676|GO:0000166
Dr00711	Ribosome biogenesis protein|Domain of unknown function DUF367	GO:0006364|GO:0009536		rnase l inhibitor protein	IPR022968|IPR007177
Dr00712	C2 domain|Armadillo|Mitochondrial inner membrane protein Mitofilin|Armadillo-type fold|Armadillo-like helical	GO:0016021|GO:0009522|GO:0015979|GO:0005886|GO:0016874		protein	IPR000008|IPR000225|IPR019133|IPR016024|IPR011989	GO:0005515|GO:0005488
Dr00713	Heavy metal-associated domain, HMA	GO:0030001|GO:0046872		metal ion binding protein	IPR006121	GO:0030001|GO:0046872
Dr00714	GTP binding domain|GTP-binding protein TrmE, N-terminal|tRNA modification GTPase MnmE C-terminal domain|P-loop containing nucleoside triphosphate hydrolase|tRNA modification GTPase MnmE domain 2|GTP-binding protein TrmE/Glycine cleavage system T protein, domain 1|Small GTP-binding protein domain|tRNA modification GTPase MnmE	GO:0005739|GO:0007264|GO:0006184|GO:0003924|GO:0006400|GO:0005525		trna modification gtpase	IPR006073|IPR018948|IPR025867|IPR027417|IPR027368|IPR027266|IPR005225|IPR004520	GO:0005525|GO:0005515|GO:0003924|GO:0005622|GO:0006184|GO:0006400
Dr00715	Cyclin C/H/T/L|Protein kinase domain|Cyclin, N-terminal|Cyclin-like|Protein kinase-like domain|Protein kinase, ATP binding site	GO:0048731|GO:0080090|GO:0007049|GO:0031323|GO:0044260|GO:0051704|GO:0060255|GO:0044767		cyclin family protein	IPR015429|IPR000719|IPR006671|IPR013763|IPR011009|IPR017441	GO:0000079|GO:0006355|GO:0019901|GO:0004672|GO:0005524|GO:0006468|GO:0016772
Dr00716	Annexin, plant|Annexin repeat|Annexin				IPR009118|IPR018502|IPR001464	GO:0005509|GO:0005544
Dr00717	PHP, C-terminal|Polymerase/histidinol phosphatase-like|Polymerase/histidinol phosphatase, N-terminal	GO:0003887|GO:0003677|GO:0006260|GO:0042575	EC:2.7.7.7	protein trph-like	IPR004013|IPR016195|IPR003141	GO:0003824|GO:0003677|GO:0003887|GO:0006260
Dr00718	WD40 repeat|WD40-repeat-containing domain|WD40/YVTN repeat-like-containing domain|WD40 repeat, conserved site				IPR001680|IPR017986|IPR015943|IPR019775	GO:0005515
Dr00719	AP2/ERF domain|DNA-binding domain				IPR001471|IPR016177	GO:0003700|GO:0006355|GO:0003677
Dr00720	Trehalose-phosphatase|HAD-like domain	GO:0003824		trehalose-phosphate phosphatase-like	IPR003337|IPR023214	GO:0003824|GO:0005992
Dr00721
Dr00722
Dr00723	VQ				IPR008889
Dr00724	Armadillo-type fold|Armadillo-like helical|Tetratricopeptide-like helical	GO:0005886|GO:0006950		heat shock protein 70 -interacting	IPR016024|IPR011989|IPR011990	GO:0005488|GO:0005515
Dr00725	Domain of unknown function DUF4057				IPR025131
Dr00726	Pumilio RNA-binding repeat|Armadillo-type fold|Armadillo-like helical				IPR001313|IPR016024|IPR011989	GO:0003723|GO:0005488
Dr00727
Dr00728	TLDc				IPR006571
Dr00729
Dr00730	P-type ATPase, A domain|Heavy metal-associated domain, HMA|HAD-like domain|Cation-transporting P-type ATPase|P-type ATPase, cytoplasmic domain N|Cation-transporting P-type ATPase, subfamily IB|P-type ATPase, phosphorylation site|Heavy-metal-associated, conserved site	GO:0004008|GO:0009767|GO:0016021|GO:0046872|GO:0009941|GO:0005524|GO:0060003|GO:0009570	EC:3.6.3.4	metal-transporting p-type atpase	IPR008250|IPR006121|IPR023214|IPR023299|IPR001757|IPR027256|IPR018303|IPR017969	GO:0000166|GO:0046872|GO:0030001|GO:0006812|GO:0016021|GO:0019829
Dr00731	General substrate transporter|Sugar/inositol transporter|Major facilitator superfamily domain, general substrate transporter|Major facilitator superfamily domain|Sugar transporter, conserved site	GO:0016491|GO:0005351|GO:0008643|GO:0016020		sugar transport protein 5-like	IPR005828|IPR016196|IPR003663|IPR020846|IPR005829	GO:0016021|GO:0022857|GO:0055085|GO:0016020|GO:0022891|GO:0005215|GO:0006810		Reactome: REACT_15518
Dr00732		GO:0043231		zyp1 protein
Dr00733	Ubiquitin carboxyl-terminal hydrolases family 2|Peptidase C19, ubiquitin carboxyl-terminal hydrolase 2, conserved site	GO:0006511|GO:0004221|GO:0005634|GO:0008234|GO:0016579	EC:3.1.2.15	ubiquitin carboxyl-terminal hydrolase 3	IPR001394|IPR018200	GO:0004221|GO:0006511
Dr00734	Major intrinsic protein|Aquaporin-like|Major intrinsic protein, conserved site	GO:0006820|GO:0005215|GO:0044464|GO:0016020		aquaporin nip1-2	IPR000425|IPR023271|IPR022357	GO:0005215|GO:0006810|GO:0016020
Dr00735	Microsomal signal peptidase 12kDa subunit	GO:0016020		uncharacterized protein loc100278684	IPR009542	GO:0005787|GO:0006465|GO:0008233|GO:0016021	EC:3.4.-.-	KEGG: 00310+3.4.-.-|KEGG: 00550+3.4.-.-|KEGG: 00780+3.4.-.-
Dr00736	Domain of unknown function DUF1084	GO:0005886|GO:0005774|GO:0016021|GO:0046786		virion binding	IPR009457
Dr00737	Amidase|Tetratricopeptide TPR2|Amidase signature domain|Tetratricopeptide-like helical|Tetratricopeptide repeat|Tetratricopeptide repeat-containing domain	GO:0043231|GO:0044444|GO:0016787		amidase family protein	IPR000120|IPR013105|IPR023631|IPR011990|IPR019734|IPR013026	GO:0016884|GO:0005515	EC:6.3.5.-	KEGG: 00253+6.3.5.-
Dr00738	Protein kinase domain|Protein kinase-like domain|Serine/threonine- / dual specificity protein kinase, catalytic domain|Serine/threonine-protein kinase, active site	GO:0005886|GO:0006468|GO:0005524|GO:0016021|GO:0004674|GO:0005739|GO:0009069	EC:2.7.11.0	brassinosteroid insensitive 1-associated receptor kinase 1 expressed	IPR000719|IPR011009|IPR002290|IPR008271	GO:0004672|GO:0005524|GO:0006468|GO:0016772|GO:0004674
Dr00739	Protein kinase domain|Leucine-rich repeat|Leucine-rich repeat-containing N-terminal, type 2|Leucine rich repeat 4|Protein kinase-like domain|Concanavalin A-like lectin/glucanase, subgroup|Serine/threonine- / dual specificity protein kinase, catalytic domain|Protein kinase, ATP binding site|Serine/threonine-protein kinase, active site	GO:0005886|GO:0006468|GO:0005524|GO:0016021|GO:0004674|GO:0005739|GO:0009069	EC:2.7.11.0	brassinosteroid insensitive 1-associated receptor kinase 1 expressed	IPR000719|IPR001611|IPR013210|IPR025875|IPR011009|IPR013320|IPR002290|IPR017441|IPR008271	GO:0004672|GO:0005524|GO:0006468|GO:0005515|GO:0016772|GO:0004674
Dr00740	UDP-glucuronosyl/UDP-glucosyltransferase	GO:0035251		udp-glucosyl transferase 85a2	IPR002213	GO:0008152|GO:0016758
Dr00741	Amine oxidase|SWIRM domain|Flavin amine oxidase|Homeodomain-like|Winged helix-turn-helix DNA-binding domain|NAD(P)-binding domain	GO:0048731|GO:0097159|GO:0016491|GO:0016570|GO:1901363		lysine-specific histone demethylase 1 homolog 1-like	IPR002937|IPR007526|IPR009057|IPR011991|IPR016040|IPR001613	GO:0016491|GO:0055114|GO:0005515|GO:0003677
Dr00742	Putative S-adenosyl-L-methionine-dependent methyltransferase	GO:0048364|GO:0009735|GO:0048367|GO:0032259|GO:0010289|GO:0008168|GO:0005794|GO:0005886	EC:2.1.1.0	pectin methyltransferase qua2	IPR004159	GO:0008168	EC:2.1.1.-	KEGG: 00130+2.1.1.-|KEGG: 00253+2.1.1.-|KEGG: 00270+2.1.1.-|KEGG: 00340+2.1.1.-|KEGG: 00350+2.1.1.-|KEGG: 00360+2.1.1.-|KEGG: 00380+2.1.1.-|KEGG: 00450+2.1.1.-|KEGG: 00522+2.1.1.-|KEGG: 00624+2.1.1.-|KEGG: 00627+2.1.1.-|KEGG: 00860+2.1.1.-|KEGG: 00940+2.1.1.-|KEGG: 00941+2.1.1.-|KEGG: 00942+2.1.1.-|KEGG: 00945+2.1.1.-|KEGG: 00950+2.1.1.-|KEGG: 00981+2.1.1.-
Dr00743	Thioredoxin domain|Thioredoxin-like fold	GO:0016023		disulfide isomerase-like protein	IPR013766|IPR012336	GO:0045454
Dr00744		GO:0035251|GO:0008152		protein
Dr00745	UDP-glucuronosyl/UDP-glucosyltransferase	GO:0035251		protein	IPR002213	GO:0008152|GO:0016758
Dr00746	UDP-glucuronosyl/UDP-glucosyltransferase	GO:0035251		protein	IPR002213	GO:0008152|GO:0016758
Dr00747	UDP-glucuronosyl/UDP-glucosyltransferase	GO:0016758	EC:2.4.1.0	udp-glycosyltransferase 85a2-like	IPR002213	GO:0008152|GO:0016758
Dr00748	UDP-glucuronosyl/UDP-glucosyltransferase	GO:0016758	EC:2.4.1.0	protein	IPR002213	GO:0008152|GO:0016758
Dr00749	UDP-glucuronosyl/UDP-glucosyltransferase	GO:0035251		udp-glycosyltransferase 85a2 isoform 1	IPR002213	GO:0008152|GO:0016758
Dr00750	UDP-glucuronosyl/UDP-glucosyltransferase	GO:0035251		protein	IPR002213	GO:0008152|GO:0016758
Dr00751	UDP-glucuronosyl/UDP-glucosyltransferase	GO:0035251		protein	IPR002213	GO:0008152|GO:0016758
Dr00752	Probable transposase, Ptta/En/Spm, plant|Ubiquitin-related modifier 1|Molybdopterin synthase/thiamin biosynthesis sulphur carrier, beta-grasp|Beta-grasp domain				IPR004252|IPR015221|IPR016155|IPR012675	GO:0005737|GO:0034227		UniPathway: UPA00988
Dr00753	UDP-glucuronosyl/UDP-glucosyltransferase	GO:0035251		udp-glycosyltransferase 85a2	IPR002213	GO:0008152|GO:0016758
Dr00754	Phosphotyrosyl phosphatase activator, PTPA	GO:0019211|GO:0009536		phosphotyrosyl phosphatase activator protein	IPR004327	GO:0019211
Dr00755
Dr00756		GO:0006457|GO:0009658|GO:0005509|GO:0003756|GO:0009535	EC:5.3.4.1	protein
Dr00757	DNA/RNA helicase, DEAD/DEAH box type, N-terminal|Helicase, C-terminal|P-loop containing nucleoside triphosphate hydrolase|Helicase, superfamily 1/2, ATP-binding domain|RNA helicase, DEAD-box type, Q motif|RNA helicase, ATP-dependent, DEAD-box, conserved site	GO:0003723|GO:0004004|GO:0006364|GO:0006200|GO:0005524|GO:0000184|GO:0005634		dead-box atp-dependent rna helicase 14	IPR011545|IPR001650|IPR027417|IPR014001|IPR014014|IPR000629	GO:0003676|GO:0005524|GO:0008026|GO:0004386
Dr00758	EF-hand domain pair|EF-hand domain|EF-Hand 1, calcium-binding site				IPR011992|IPR002048|IPR018247	GO:0005509
Dr00759	EF-hand domain|EF-hand domain pair|EF-Hand 1, calcium-binding site	GO:0005509		ef hand family protein	IPR002048|IPR011992|IPR018247	GO:0005509
Dr00760	EF-hand domain|EF-hand domain pair|EF-Hand 1, calcium-binding site				IPR002048|IPR011992|IPR018247	GO:0005509
Dr00761	EF-hand domain pair|EF-hand domain|EF-Hand 1, calcium-binding site				IPR011992|IPR002048|IPR018247	GO:0005509
Dr00762	EF-hand domain|EF-hand domain pair|EF-Hand 1, calcium-binding site				IPR002048|IPR011992|IPR018247	GO:0005509
Dr00763	EF-hand domain pair|EF-hand domain|EF-Hand 1, calcium-binding site				IPR011992|IPR002048|IPR018247	GO:0005509
Dr00764		GO:0006310|GO:0006281|GO:0007076|GO:0005524|GO:0007062|GO:0000796|GO:0005634		condensin complex components subunit
Dr00765	EF-hand domain|EF-hand domain pair|EF-Hand 1, calcium-binding site				IPR002048|IPR011992|IPR018247	GO:0005509
Dr00766	EF-hand domain|EF-hand domain pair|EF-Hand 1, calcium-binding site	GO:0005509		ef hand family protein	IPR002048|IPR011992|IPR018247	GO:0005509
Dr00767
Dr00768	Protein phosphatase 2C|Protein phosphatase 2C (PP2C)-like domain	GO:0004721|GO:0006470	EC:3.1.3.16	probable protein phosphatase 2c 12-like	IPR015655|IPR001932	GO:0003824
Dr00769	Alcohol dehydrogenase superfamily, zinc-type|Short-chain dehydrogenase/reductase SDR|Alcohol dehydrogenase GroES-like|Glucose/ribitol dehydrogenase|GroES (chaperonin 10)-like|NAD(P)-binding domain|Polyketide synthase, enoylreductase	GO:0003960|GO:0016404|GO:0043231|GO:0044444|GO:0008270|GO:0000166|GO:0055114|GO:0006118	EC:1.6.5.5|EC:1.1.1.141	arp protein	IPR002085|IPR002198|IPR013154|IPR011032|IPR016040|IPR002347|IPR020843	GO:0008270|GO:0016491|GO:0055114|GO:0008152|GO:0016747
Dr00770	Alcohol dehydrogenase superfamily, zinc-type|Alcohol dehydrogenase, C-terminal|NAD(P)-binding domain	GO:0003960|GO:0016404|GO:0006979|GO:0005777|GO:0008270|GO:0005739|GO:0000166|GO:0055114|GO:0006118	EC:1.6.5.5|EC:1.1.1.141	arp protein	IPR002085|IPR013149|IPR016040	GO:0008270|GO:0016491|GO:0055114
Dr00771	Zinc finger, RING-type|Zinc finger, RING/FYVE/PHD-type	GO:0016020		e3 ubiquitin protein ligase rie1-like	IPR001841|IPR013083	GO:0005515|GO:0008270
Dr00772	Tetratricopeptide-like helical|Tetratricopeptide repeat	GO:0005739		kinesin light chain	IPR011990|IPR019734	GO:0005515
Dr00773	Vacuole morphology and inheritance protein 14|Vacuolar protein 14 C-terminal Fig4-binding domain|Armadillo-type fold|Armadillo-like helical|HEAT, type 2	GO:0019209|GO:0005886|GO:0042327		protein vac14 homolog	IPR026825|IPR021841|IPR016024|IPR011989|IPR021133	GO:0019209|GO:0042327|GO:0005488
Dr00774	Protein kinase domain|Leucine-rich repeat-containing N-terminal, type 2|Protein kinase-like domain|Concanavalin A-like lectin/glucanase, subgroup|Protein kinase, ATP binding site	GO:0016020|GO:0016772|GO:0000166		inactive receptor kinase	IPR000719|IPR013210|IPR011009|IPR013320|IPR017441	GO:0004672|GO:0005524|GO:0006468|GO:0016772
Dr00775	Ubiquitin-conjugating enzyme, E2|DnaJ domain|Chaperone DnaJ, C-terminal|HSP40/DnaJ peptide-binding|Ubiquitin-conjugating enzyme/RWD-like|Heat shock protein DnaJ, cysteine-rich domain|Chaperone DnaJ	GO:0005488		molecular chaperone hsp40 -like protein	IPR000608|IPR001623|IPR002939|IPR008971|IPR016135|IPR001305|IPR012724	GO:0016881|GO:0006457|GO:0051082|GO:0031072|GO:0005524|GO:0009408
Dr00776	Terpene synthase, N-terminal domain|Terpenoid cyclases/protein prenyltransferase alpha-alpha toroid				IPR001906|IPR008930	GO:0008152|GO:0010333|GO:0016829
Dr00777
Dr00778	Terpene synthase, N-terminal domain|Terpene synthase, metal-binding domain|Terpenoid cyclases/protein prenyltransferase alpha-alpha toroid|Terpenoid synthase	GO:0016838	EC:4.2.3.0	(-)-germacrene d synthase	IPR001906|IPR005630|IPR008930|IPR008949	GO:0008152|GO:0010333|GO:0016829|GO:0000287
Dr00779	Terpene synthase, metal-binding domain|Terpenoid synthase	GO:0005737|GO:0016829		sesquiterpene synthase	IPR005630|IPR008949	GO:0000287|GO:0010333|GO:0016829
Dr00780	Lipase, class 3|Mono-/di-acylglycerol lipase, N-terminal	GO:0071704|GO:0044238|GO:0016787		calmodulin-binding heat-shock protein	IPR002921|IPR005592	GO:0004806|GO:0006629|GO:0004091|GO:0016042		Reactome: REACT_14797|Reactome: REACT_604
Dr00781	Pectinesterase inhibitor domain				IPR006501	GO:0004857|GO:0030599	EC:3.1.1.11	KEGG: 00040+3.1.1.11|KEGG: 00500+3.1.1.11|MetaCyc: PWY-1081|MetaCyc: PWY-7243|MetaCyc: PWY-7246|MetaCyc: PWY-7248|UniPathway: UPA00545
Dr00782	Leucine rich repeat 4|Leucine-rich repeat				IPR025875|IPR001611	GO:0005515
Dr00783	Glycoside hydrolase, family 17|X8|Glycoside hydrolase, superfamily|Glycoside hydrolase, catalytic domain	GO:0046658|GO:0016023|GO:0042973|GO:0005982|GO:0005985	EC:3.2.1.39	glucan endo- -beta-glucosidase	IPR000490|IPR012946|IPR017853|IPR013781	GO:0004553|GO:0005975|GO:0003824	EC:3.2.1.39	KEGG: 00500+3.2.1.39
Dr00784	SANT/Myb domain|NAC domain|Homeodomain-like|Myb-like domain|Myb domain				IPR001005|IPR003441|IPR009057|IPR017877|IPR017930	GO:0003682|GO:0003677|GO:0006355
Dr00785	Protein kinase domain|Protein kinase-like domain|Pleckstrin homology-like domain|Serine/threonine- / dual specificity protein kinase, catalytic domain|AGC-kinase, C-terminal|Serine/threonine-protein kinase, active site	GO:0004713|GO:0006468|GO:0005524|GO:0004674|GO:0009069	EC:2.7.10.0|EC:2.7.11.0	protein kinase domain-containing protein	IPR000719|IPR011009|IPR011993|IPR002290|IPR000961|IPR008271	GO:0004672|GO:0005524|GO:0006468|GO:0016772|GO:0004674
Dr00786	Armadillo|U box domain|Armadillo-type fold|Armadillo-like helical|Zinc finger, RING/FYVE/PHD-type	GO:0016874		u-box domain-containing protein 10-like	IPR000225|IPR003613|IPR016024|IPR011989|IPR013083	GO:0005515|GO:0000151|GO:0004842|GO:0016567|GO:0005488
Dr00787	Cytochrome P450|Cytochrome P450, E-class, group I	GO:0005488|GO:0016491|GO:0016023		cytokinin hydroxylase-like	IPR001128|IPR002401	GO:0005506|GO:0016705|GO:0020037|GO:0055114		Reactome: REACT_13433
Dr00788
Dr00789	Zinc finger, B-box|CCT domain				IPR000315|IPR010402	GO:0005622|GO:0008270|GO:0005515
Dr00790		GO:0006891|GO:0030173		protein casp
Dr00791		GO:0009507		uncharacterized protein chloroplastic-like
Dr00792	Glycolipid transfer protein domain	GO:0005737|GO:0046836|GO:0051861|GO:0017089		glycolipid transfer protein	IPR014830	GO:0005737|GO:0017089|GO:0046836|GO:0051861
Dr00793	Protein kinase domain|Protein kinase-like domain|Serine/threonine- / dual specificity protein kinase, catalytic domain|Serine/threonine-protein kinase, active site	GO:0006468|GO:0005524|GO:0004674|GO:0009536|GO:0009069	EC:2.7.11.0	serine threonine-protein kinase prp4	IPR000719|IPR011009|IPR002290|IPR008271	GO:0004672|GO:0005524|GO:0006468|GO:0016772|GO:0004674
Dr00794	Tat binding protein 1-interacting|Winged helix-turn-helix DNA-binding domain				IPR010776|IPR011991
Dr00795	2-oxoacid dehydrogenase acyltransferase, catalytic domain|Biotin/lipoyl attachment|E3 binding|Single hybrid motif|Chloramphenicol acetyltransferase-like domain|2-oxo acid dehydrogenase, lipoyl-binding site	GO:0016746|GO:0044434		dihydrolipoyllysine-residue acetyltransferase component of pyruvate dehydrogenase complex-like	IPR001078|IPR000089|IPR004167|IPR011053|IPR023213|IPR003016	GO:0008152|GO:0016746
Dr00796	Alpha/beta hydrolase fold-3|Lipase, GDXG, active site	GO:0005739|GO:0052689	EC:3.1.1.0	probable carboxylesterase 17-like	IPR013094|IPR002168	GO:0008152|GO:0016787
Dr00797	Transcription factor, MADS-box|Transcription factor, K-box	GO:0050896|GO:0010440|GO:0048731|GO:0055114|GO:0006355|GO:0003677|GO:0046983|GO:0003700|GO:0032440|GO:0008134|GO:0005667|GO:0045449	EC:1.3.1.74	mads-box transcription factor 27-like	IPR002100|IPR002487	GO:0003677|GO:0046983|GO:0003700|GO:0005634|GO:0006355		Reactome: REACT_21303
Dr00798	DENND6|DENN domain				IPR024224|IPR001194
Dr00799	NmrA-like|NAD(P)-binding domain	GO:0055114|GO:0033788|GO:0000166	EC:1.17.1.3	leucoanthocyanidin reductase	IPR008030|IPR016040
Dr00800	Sel1-like|Tetratricopeptide-like helical	GO:0043231|GO:0044444		protein	IPR006597|IPR011990	GO:0005515
Dr00801	Protein kinase domain|Protein kinase-like domain|Serine/threonine- / dual specificity protein kinase, catalytic domain|Serine/threonine-protein kinase, active site	GO:0016310|GO:0004672|GO:0000166		kinase family protein	IPR000719|IPR011009|IPR002290|IPR008271	GO:0004672|GO:0005524|GO:0006468|GO:0016772|GO:0004674
Dr00802	Organic solute transporter Ost-alpha	GO:0005576|GO:0016021|GO:0016491|GO:0000166|GO:0055114|GO:0008270		transmembrane protein 184c	IPR005178
Dr00803
Dr00804	ATP phosphoribosyltransferase HisG|ATP phosphoribosyltransferase, catalytic domain|Histidine biosynthesis HisG, C-terminal|Nitrogen regulatory PII-like, alpha/beta|Nitrogen regulatory protein PII/ATP phosphoribosyltransferase, C-terminal|ATP phosphoribosyltransferase, conserved site	GO:0003879|GO:0000105|GO:0000287|GO:0009507	EC:2.4.2.17	atp phosphoribosyl transferase	IPR001348|IPR013820|IPR013115|IPR011322|IPR015867|IPR018198	GO:0000105|GO:0003879|GO:0005737|GO:0000287	EC:2.4.2.17	KEGG: 00340+2.4.2.17|UniPathway: UPA00031
Dr00805
Dr00806
Dr00807
Dr00808	Ribosomal protein L36	GO:0005840|GO:0003735|GO:0009507|GO:0006412|GO:0042254		50s ribosomal protein l36	IPR000473	GO:0003735|GO:0005622|GO:0005840|GO:0006412
Dr00809	Protein of unknown function DUF4870|Chloroplast protein import component Tic20	GO:0006810|GO:0009528|GO:0009507		protein	IPR019109|IPR005691
Dr00810	Vacuolar protein sorting-associated, VPS28|Vacuolar protein sorting-associated, VPS28, C-terminal|Vacuolar protein sorting-associated, VPS28, N-terminal				IPR007143|IPR017899|IPR017898
Dr00811	B3 DNA binding domain|Zinc finger, CW-type|DNA-binding pseudobarrel domain	GO:0005488|GO:0050789|GO:0009536		protein	IPR003340|IPR011124|IPR015300	GO:0003677|GO:0008270
Dr00812	Myosin head, motor domain|IQ motif, EF-hand binding site|P-loop containing nucleoside triphosphate hydrolase	GO:0005488|GO:0009536		myosin-j heavy chain-like	IPR001609|IPR000048|IPR027417	GO:0003774|GO:0005524|GO:0016459|GO:0005515
Dr00813	Zinc finger, C2H2|Zinc finger C2H2-type/integrase DNA-binding domain|Zinc finger, C2H2-like	GO:0003676|GO:0005634		transcription factor iiia	IPR007087|IPR013087|IPR015880	GO:0046872|GO:0003676
Dr00814	Glycosyl transferase, family 8	GO:0005739|GO:0016757		glycosyl transferase protein a	IPR002495	GO:0016757
Dr00815	DNA/RNA helicase, DEAD/DEAH box type, N-terminal|Helicase, C-terminal|P-loop containing nucleoside triphosphate hydrolase|Helicase, superfamily 1/2, ATP-binding domain|RNA helicase, ATP-dependent, DEAD-box, conserved site	GO:0003676|GO:0006355|GO:0008026|GO:0005524		atp-dependent rna helicase	IPR011545|IPR001650|IPR027417|IPR014001|IPR000629	GO:0003676|GO:0005524|GO:0008026|GO:0004386
Dr00816	P-loop containing nucleoside triphosphate hydrolase|RNA helicase, DEAD-box type, Q motif	GO:0009987|GO:0003676|GO:0008026|GO:0005524		protein	IPR027417|IPR014014
Dr00817
Dr00818	Bromodomain				IPR001487	GO:0005515
Dr00819	Diacylglycerol kinase, accessory domain|Diacylglycerol kinase, catalytic domain|ATP-NAD kinase-like domain	GO:0016740		diacylglycerol kinase 5	IPR000756|IPR001206|IPR016064	GO:0004143|GO:0007205|GO:0003951|GO:0008152	EC:2.7.1.107	KEGG: 00561+2.7.1.107|KEGG: 00564+2.7.1.107|MetaCyc: PWY-7039|Reactome: REACT_14797|Reactome: REACT_604
Dr00820	Photosystem II Psp29, biogenesis	GO:0016021|GO:0045038|GO:0010027|GO:0009535|GO:0009523|GO:0009570|GO:0015979|GO:0007186|GO:0045037|GO:0009707|GO:0010182|GO:0009528|GO:0010319		protein thylakoid chloroplastic-like	IPR017499	GO:0009523|GO:0010027|GO:0015979
Dr00821	Protein of unknown function wound-induced				IPR022251
Dr00822		GO:0005739|GO:0009570		receptor-interacting protein
Dr00823	General substrate transporter|Sugar/inositol transporter|Major facilitator superfamily domain, general substrate transporter|Major facilitator superfamily domain|Sugar transporter, conserved site	GO:0009624|GO:0005773|GO:0015749|GO:0005886|GO:0015145|GO:0055085|GO:0008506|GO:0032440|GO:0016021|GO:0005634|GO:0055114|GO:0006812|GO:0015770	EC:1.3.1.74	protein	IPR005828|IPR016196|IPR003663|IPR020846|IPR005829	GO:0016021|GO:0022857|GO:0055085|GO:0016020|GO:0022891|GO:0005215|GO:0006810		Reactome: REACT_15518
Dr00824	Pentatricopeptide repeat|Tetratricopeptide-like helical	GO:0007205|GO:0004143|GO:0009536|GO:0009395|GO:0046486	EC:2.7.1.107	pentatricopeptide repeat-containing protein at5g66520-like	IPR002885|IPR011990	GO:0005515
Dr00825	Uncharacterised protein family Cys-rich				IPR006461
Dr00826	Diacylglycerol kinase, accessory domain	GO:0004143|GO:0048364|GO:0009536|GO:0007205|GO:0016310|GO:0048366|GO:0005886|GO:0009395|GO:0046486	EC:2.7.1.107	diacylglycerol kinase	IPR000756	GO:0004143|GO:0007205	EC:2.7.1.107	KEGG: 00561+2.7.1.107|KEGG: 00564+2.7.1.107|MetaCyc: PWY-7039|Reactome: REACT_14797|Reactome: REACT_604
Dr00827	Cytochrome P450|Cytochrome P450, E-class, group I|Cytochrome P450, conserved site	GO:0016020|GO:0043231|GO:0043436|GO:0044711|GO:0042435|GO:0006952|GO:0005488|GO:0016709|GO:0044444	EC:1.14.13.0	cytochrome p450	IPR001128|IPR002401|IPR017972	GO:0005506|GO:0016705|GO:0020037|GO:0055114		Reactome: REACT_13433
Dr00828
Dr00829	Cytochrome P450|Cytochrome P450, E-class, group I|Cytochrome P450, conserved site	GO:0016020|GO:0043231|GO:0044272|GO:0043436|GO:0009617|GO:0016491|GO:0042435|GO:0044550|GO:0006952|GO:0005488|GO:0044444		cytochrome p450	IPR001128|IPR002401|IPR017972	GO:0005506|GO:0016705|GO:0020037|GO:0055114		Reactome: REACT_13433
Dr00830
Dr00831	Cytochrome P450|Cytochrome P450, E-class, group I|Cytochrome P450, conserved site	GO:0016020|GO:0043231|GO:0043436|GO:0016491|GO:0044711|GO:0042435|GO:0006952|GO:0005488|GO:0044444		cytochrome p450	IPR001128|IPR002401|IPR017972	GO:0005506|GO:0016705|GO:0020037|GO:0055114		Reactome: REACT_13433
Dr00832	Cytochrome P450|Cytochrome P450, E-class, group I	GO:0043231|GO:0016491|GO:0050896|GO:0044444		cytochrome p450	IPR001128|IPR002401	GO:0005506|GO:0016705|GO:0020037|GO:0055114		Reactome: REACT_13433
Dr00833	Cytochrome P450|Cytochrome P450, E-class, group I|Cytochrome P450, conserved site	GO:0016020|GO:0043231|GO:0043436|GO:0044711|GO:0042435|GO:0006952|GO:0005488|GO:0016709|GO:0044444	EC:1.14.13.0	cytochrome p450	IPR001128|IPR002401|IPR017972	GO:0005506|GO:0016705|GO:0020037|GO:0055114		Reactome: REACT_13433
Dr00834	Cytochrome P450|Cytochrome P450, E-class, group I	GO:0046872|GO:0016491|GO:0016023|GO:0016020		cytochrome p450	IPR001128|IPR002401	GO:0005506|GO:0016705|GO:0020037|GO:0055114		Reactome: REACT_13433
Dr00835	Cytochrome P450|Cytochrome P450, E-class, group I|Cytochrome P450, conserved site	GO:0044699|GO:0043436|GO:0016705|GO:0046872|GO:0004497|GO:0044425|GO:0031090|GO:0044711|GO:0042435|GO:0005783|GO:0006952		cytochrome p450	IPR001128|IPR002401|IPR017972	GO:0005506|GO:0016705|GO:0020037|GO:0055114		Reactome: REACT_13433
Dr00836	Probable transposase, Ptta/En/Spm, plant				IPR004252
Dr00837	Cytochrome P450	GO:0046872|GO:0016491		cytochrome p450	IPR001128	GO:0005506|GO:0016705|GO:0020037|GO:0055114		Reactome: REACT_13433
Dr00838	Cytochrome P450				IPR001128	GO:0005506|GO:0016705|GO:0020037|GO:0055114		Reactome: REACT_13433
Dr00839
Dr00840	Cytochrome P450|Cytochrome P450, E-class, group I|Cytochrome P450, conserved site	GO:0044699|GO:0043436|GO:0016705|GO:0046872|GO:0004497|GO:0044425|GO:0031090|GO:0044711|GO:0042435|GO:0005783|GO:0006952		cytochrome p450	IPR001128|IPR002401|IPR017972	GO:0005506|GO:0016705|GO:0020037|GO:0055114		Reactome: REACT_13433
Dr00841	UspA|Rossmann-like alpha/beta/alpha sandwich fold	GO:0005829|GO:0006950|GO:0005634|GO:0009536|GO:0005886|GO:0002238		adenine nucleotide alpha hydrolases-like protein	IPR006016|IPR014729	GO:0006950
Dr00842
Dr00843	S-locus glycoprotein|Bulb-type lectin domain|Serine-threonine/tyrosine-protein kinase catalytic domain|PAN-2 domain|Protein kinase-like domain|Concanavalin A-like lectin/glucanase, subgroup|Apple-like|Protein kinase domain	GO:0016772		receptor-like serine threonine protein kinase ark3	IPR000858|IPR001480|IPR001245|IPR013227|IPR011009|IPR013320|IPR003609|IPR000719	GO:0048544|GO:0004672|GO:0006468|GO:0016772|GO:0005524
Dr00844	U box domain|Armadillo-type fold|Armadillo-like helical|Zinc finger, RING/FYVE/PHD-type	GO:0016874		u-box domain-containing protein 8-like	IPR003613|IPR016024|IPR011989|IPR013083	GO:0000151|GO:0004842|GO:0016567|GO:0005488
Dr00845
Dr00846	NADPH-dependent FMN reductase-like|Flavoprotein WrbA|Flavodoxin/nitric oxide synthase	GO:0050625|GO:0055114|GO:0016023|GO:0009733|GO:0003960|GO:0045892|GO:0005773|GO:0010181|GO:0005886|GO:0006118	EC:1.6.5.7|EC:1.6.5.5	quinone reductase family protein	IPR005025|IPR010089|IPR008254	GO:0016491|GO:0010181|GO:0045892	EC:1.6.5.2	KEGG: 00130+1.6.5.2|MetaCyc: PWY-6785
Dr00847	Cytochrome P450|Cytochrome P450, E-class, group I|Cytochrome P450, conserved site	GO:0043231|GO:0044444|GO:0003824|GO:0016020		cytochrome p450	IPR001128|IPR002401|IPR017972	GO:0005506|GO:0016705|GO:0020037|GO:0055114		Reactome: REACT_13433
Dr00848	Cytochrome P450|Cytochrome P450, E-class, group I|Cytochrome P450, conserved site	GO:0016020|GO:0043231|GO:0050896|GO:0016705|GO:0004497|GO:0044710|GO:0009987		cytochrome p450	IPR001128|IPR002401|IPR017972	GO:0005506|GO:0016705|GO:0020037|GO:0055114		Reactome: REACT_13433
Dr00849	Probable transposase, Ptta/En/Spm, plant				IPR004252
Dr00850	Cytochrome P450|Cytochrome P450, E-class, group I|Cytochrome P450, conserved site	GO:0016020|GO:0043231|GO:0044272|GO:0043436|GO:0009617|GO:0042435|GO:0044550|GO:0006952|GO:0005488|GO:0016709|GO:0044444	EC:1.14.13.0	cytochrome p450	IPR001128|IPR002401|IPR017972	GO:0005506|GO:0016705|GO:0020037|GO:0055114		Reactome: REACT_13433
Dr00851	Microtubule-associated protein 70	GO:0008017|GO:0010005|GO:0005886|GO:0010051|GO:0009832|GO:0045298		microtubule-associated proteins 70-3	IPR009768	GO:0007010|GO:0008017
Dr00852	Cytochrome P450|Cytochrome P450, E-class, group I|Cytochrome P450, conserved site	GO:0005488|GO:0043231|GO:0016705|GO:0004497|GO:0044444|GO:0016020		cytochrome p450	IPR001128|IPR002401|IPR017972	GO:0005506|GO:0016705|GO:0020037|GO:0055114		Reactome: REACT_13433
Dr00853		GO:0005759|GO:0005525|GO:0005743|GO:0009507|GO:0006184|GO:0043022|GO:0045727|GO:0003924		gtp-binding protein
Dr00854	Cytochrome P450|Cytochrome P450, E-class, group I|Cytochrome P450, conserved site	GO:0016491|GO:0043231|GO:0016020		cytochrome p450	IPR001128|IPR002401|IPR017972	GO:0005506|GO:0016705|GO:0020037|GO:0055114		Reactome: REACT_13433
Dr00855	mRNA (guanine-N(7))-methyltransferase domain|mRNA (guanine-N(7))-methyltransferase	GO:0006370|GO:0004482|GO:0003723|GO:0036265|GO:0005634	EC:2.1.1.56	mrna cap guanine-n7 methyltransferase 1	IPR004971|IPR016899	GO:0004482|GO:0005634|GO:0006370
Dr00856	Cytokinin riboside 5'-monophosphate phosphoribohydrolase LOG				IPR005269
Dr00857
Dr00858	Pentatricopeptide repeat|Tetratricopeptide-like helical				IPR002885|IPR011990	GO:0005515
Dr00859	Glycoside hydrolase, family 1|Glycoside hydrolase, superfamily|Glycoside hydrolase, catalytic domain|Glycoside hydrolase, family 1, active site	GO:0009505|GO:0005975|GO:0016023|GO:0008422	EC:3.2.1.21	beta-glucosidase 25-like	IPR001360|IPR017853|IPR013781|IPR018120	GO:0004553|GO:0005975|GO:0003824
Dr00860	Cytochrome b-c1 complex, subunit 6|Ubiquinol-cytochrome C reductase hinge domain	GO:0005750|GO:0008121|GO:0006122|GO:0045153|GO:0006118|GO:0015992|GO:0045285	EC:1.10.2.2	protein	IPR003422|IPR023184	GO:0006122|GO:0008121
Dr00861	Geminivirus AL1 replication-associated protein, central domain				IPR022692	GO:0016888
Dr00862	Dolichol phosphate-mannose biosynthesis regulatory	GO:0043234|GO:0030176|GO:0016023|GO:0009059|GO:0016757		dolichol phosphate-mannose biosynthesis regulatory protein	IPR009914	GO:0009059|GO:0030176
Dr00863	Zinc finger, SWIM-type				IPR007527	GO:0008270
Dr00864	Ribosomal protein L24|KOW|Translation protein SH3-like domain|Ribosomal protein L2 domain 2|Ribosomal protein L24/L26, conserved site	GO:0005840|GO:0003735|GO:0009570|GO:0006412|GO:0019843|GO:0042254		50s ribosomal protein l24	IPR003256|IPR005824|IPR008991|IPR014722|IPR005825	GO:0003735|GO:0005622|GO:0005840|GO:0006412
Dr00865	NAD-dependent epimerase/dehydratase|NAD(P)-binding domain	GO:0008152|GO:0003824		anthocyanidin reductase	IPR001509|IPR016040	GO:0003824|GO:0044237|GO:0050662
Dr00866	Rmd5|CTLH/CRA C-terminal to LisH motif domain|RING-type zinc-finger, LisH dimerisation motif|Zinc finger, RING/FYVE/PHD-type|CTLH, C-terminal LisH motif|CRA domain|LisH dimerisation motif	GO:0046872		protein	IPR027711|IPR024964|IPR027370|IPR013083|IPR006595|IPR013144|IPR006594	GO:0005515
Dr00867	Poly(ADP-ribose) polymerase, catalytic domain|Zinc finger, C2H2				IPR012317|IPR007087	GO:0003950|GO:0046872
Dr00868	Formin-like family, viridiplantae|Formin, FH2 domain	GO:0016020|GO:0016023|GO:0016043		formin-like protein	IPR027643|IPR015425	GO:0005884|GO:0045010
Dr00869	Pentatricopeptide repeat|Tetratricopeptide-like helical|Zinc finger, PMZ-type|Zinc finger, SWIM-type	GO:0009536		pentatricopeptide repeat-containing protein	IPR002885|IPR011990|IPR006564|IPR007527	GO:0005515|GO:0008270
Dr00870	Ribosomal protein L28/L24|Ribosomal protein L28	GO:0005840|GO:0006457|GO:0003735|GO:0006950|GO:0005524|GO:0051082|GO:0006412|GO:0042254		60s ribosomal protein mitochondrial	IPR026569|IPR001383	GO:0003735|GO:0005622|GO:0005840|GO:0006412
Dr00871	Thioredoxin|Thioredoxin domain|Thioredoxin-like fold				IPR005746|IPR013766|IPR012336	GO:0006662|GO:0015035|GO:0045454
Dr00872	Protein of unknown function DUF604	GO:0016772		uncharacterized protein	IPR006740
Dr00873	Phosphotransferase KptA/Tpt1	GO:0016772|GO:0006388		trna 2 phosphotransferase	IPR002745	GO:0006388|GO:0016772	EC:2.7.1.-	KEGG: 00540+2.7.1.-|KEGG: 00680+2.7.1.-|KEGG: 00900+2.7.1.-
Dr00874	Crotonase superfamily|SET domain|Crontonase, C-terminal	GO:0046872		histone-lysine n-methyltransferase atxr2-like	IPR001753|IPR001214|IPR014748	GO:0003824|GO:0008152|GO:0005515
Dr00875	UHRF1-binding protein 1-like|Vacuolar protein sorting-associated protein 13A N-terminal domain				IPR026728|IPR026854
Dr00876	Zinc finger, CCCH-type	GO:0005488		zinc finger ccch domain-containing protein 13-like	IPR000571	GO:0046872
Dr00877	SWAP/Surp|CID domain				IPR000061|IPR006569	GO:0003723|GO:0006396
Dr00878	Bacterial transferase hexapeptide repeat|Trimeric LpxA-like|Hexapeptide transferase, conserved site	GO:0016747|GO:0005739	EC:2.3.1.0	bacterial transferase hexapeptide repeat-containing protein	IPR001451|IPR011004|IPR018357	GO:0016740		Reactome: REACT_17015
Dr00879	Aminotransferase-like, plant mobile domain				IPR019557
Dr00880	Solute carrier family 35 member SLC35F1/F2/F6	GO:0016020		solute carrier family 35 member f5	IPR009262	GO:0006810|GO:0016021
Dr00881	Haem peroxidase, plant/fungal/bacterial|Plant peroxidase|Haem peroxidase|Peroxidases heam-ligand binding site|Peroxidase, active site	GO:0005737|GO:0042538|GO:0046872|GO:0009505|GO:0009269|GO:0009409|GO:0006979|GO:0020037|GO:0004601|GO:0005634|GO:0055114|GO:0006804	EC:1.11.1.7	peroxidase 3	IPR002016|IPR010255|IPR000823|IPR019793|IPR019794	GO:0004601|GO:0006979|GO:0020037|GO:0055114	EC:1.11.1.7	KEGG: 00360+1.11.1.7|KEGG: 00940+1.11.1.7|MetaCyc: PWY-5461|MetaCyc: PWY-7214
Dr00882	Haem peroxidase, plant/fungal/bacterial|Plant peroxidase|Haem peroxidase|Peroxidases heam-ligand binding site|Peroxidase, active site	GO:0005488|GO:0016491|GO:0016023		peroxidase 27	IPR002016|IPR010255|IPR000823|IPR019793|IPR019794	GO:0004601|GO:0006979|GO:0020037|GO:0055114	EC:1.11.1.7	KEGG: 00360+1.11.1.7|KEGG: 00940+1.11.1.7|MetaCyc: PWY-5461|MetaCyc: PWY-7214
Dr00883	Ubiquitin domain|Ubiquitin supergroup	GO:0005739		ubiquitin family protein	IPR000626|IPR019955	GO:0005515
Dr00884	Glycoside hydrolase, family 17|Glycoside hydrolase, superfamily|Glycoside hydrolase, catalytic domain	GO:0004553|GO:0016023|GO:0005975	EC:3.2.1.0	glucan endo- -beta-glucosidase	IPR000490|IPR017853|IPR013781	GO:0004553|GO:0005975|GO:0003824	EC:3.2.1.39	KEGG: 00500+3.2.1.39
Dr00885	Ubiquitin domain|Ubiquitin supergroup				IPR000626|IPR019955	GO:0005515
Dr00886	Ubiquitin domain|Ubiquitin supergroup				IPR000626|IPR019955	GO:0005515
Dr00887	Ubiquitin domain|Ubiquitin supergroup				IPR000626|IPR019955	GO:0005515
Dr00888	Ubiquitin domain|Ubiquitin supergroup				IPR000626|IPR019955	GO:0005515
Dr00889	Machado-Joseph disease protein MJD				IPR006155	GO:0008242
Dr00890	ATPase, AAA-type, core|BRCT domain|DNA replication factor RFC1, C-terminal|DNA polymerase III, clamp loader complex, gamma/delta/delta subunit, C-terminal|P-loop containing nucleoside triphosphate hydrolase|AAA+ ATPase domain|DNA replication factor C, large subunit	GO:0044763|GO:0080090|GO:0017111|GO:0000166|GO:0090304|GO:0031323|GO:0044424|GO:0050896|GO:0034645|GO:0043234|GO:0003677|GO:0060255	EC:3.6.1.15	replication factor c subunit 1-like	IPR003959|IPR001357|IPR013725|IPR008921|IPR027417|IPR003593|IPR012178	GO:0005524|GO:0003689|GO:0005663|GO:0006260|GO:0003677|GO:0000166|GO:0017111		Reactome: REACT_152|Reactome: REACT_1538|Reactome: REACT_216|Reactome: REACT_22172|Reactome: REACT_383
Dr00891	Cation-transporting P-type ATPase, subfamily IV|P-type ATPase, A domain|Cation-transporting P-type ATPase|HAD-like domain|P-type ATPase, cytoplasmic domain N|P-type ATPase, phosphorylation site	GO:0048731|GO:0016021|GO:0044767|GO:0019829|GO:0005524|GO:0000287|GO:0004012|GO:0044464|GO:0006812|GO:0015917	EC:3.6.3.1	phospholipid-transporting atpase 3-like	IPR006539|IPR008250|IPR023214|IPR023299|IPR001757|IPR018303	GO:0000287|GO:0004012|GO:0005524|GO:0015914|GO:0016021|GO:0000166|GO:0046872|GO:0006812|GO:0019829
Dr00892	Phosphatidic acid phosphatase type 2/haloperoxidase	GO:0016787|GO:0008152|GO:0009737|GO:0016020		phosphatidic acid phosphatase family protein	IPR000326	GO:0003824|GO:0016020
Dr00893	APO domain	GO:0003723|GO:0005739		apo protein mitochondrial-like	IPR023342	GO:0003723
Dr00894	Plastocyanin-like|Cupredoxin	GO:0016023		early nodulin 55-2	IPR003245|IPR008972	GO:0005507|GO:0009055
Dr00895	Homeobox domain|START domain|Homeodomain-like|Homeobox, conserved site	GO:0009913|GO:0003677|GO:0044767|GO:0006351		homeobox-leucine zipper protein hdg2-like	IPR001356|IPR002913|IPR009057|IPR017970	GO:0003700|GO:0006355|GO:0043565|GO:0008289|GO:0003677|GO:0005634
Dr00896	RNA polymerase II-binding domain|ENTH/VHS|CID domain|Zinc finger, C2H2	GO:0005622|GO:0008270		protein	IPR006903|IPR008942|IPR006569|IPR007087	GO:0046872
Dr00897
Dr00898		GO:0009982|GO:0003723|GO:0001522|GO:0009536	EC:5.4.99.12	ribosomal pseudouridine
Dr00899	Pseudouridine synthase, RsuA/RluB/C/D/E/F|Pseudouridine synthase, catalytic domain	GO:0009982|GO:0003723|GO:0001522|GO:0009507	EC:5.4.99.12	ribosomal pseudouridine	IPR006145|IPR020103	GO:0001522|GO:0003723|GO:0009451|GO:0009982
Dr00900	Cytochrome P450|Cytochrome P450, E-class, group I|Cytochrome P450, conserved site	GO:0020037|GO:0016705|GO:0004497|GO:0005506|GO:0009055|GO:0055114|GO:0006118		cytochrome p450	IPR001128|IPR002401|IPR017972	GO:0005506|GO:0016705|GO:0020037|GO:0055114		Reactome: REACT_13433
Dr00901
Dr00902	Protein kinase domain|Protein kinase-like domain|Concanavalin A-like lectin/glucanase, subgroup|Protein kinase, ATP binding site|Serine/threonine-protein kinase, active site	GO:0004715|GO:0006468|GO:0005524|GO:0004674|GO:0009069	EC:2.7.10.2|EC:2.7.11.0	serine threonine-protein kinase pbs1-like	IPR000719|IPR011009|IPR013320|IPR017441|IPR008271	GO:0004672|GO:0005524|GO:0006468|GO:0016772|GO:0004674
Dr00903	CDP-alcohol phosphatidyltransferase	GO:0050896|GO:0071704|GO:0044238|GO:0004672|GO:0016780|GO:0044237|GO:0016020	EC:2.7.8.0	cdp-diacylglycerol--glycerol-3-phosphate 3-	IPR000462	GO:0008654|GO:0016020|GO:0016780
Dr00904	Domain of unknown function DUF1084	GO:0005774|GO:0046786|GO:0005886		tobamovirus multiplication 1 homolog 3	IPR009457
Dr00905		GO:0016023|GO:0005773		uncharacterized protein
Dr00906	Kua-ubiquitin conjugating enzyme hybrid, localisation				IPR019547
Dr00907
Dr00908
Dr00909	CO/COL/TOC1, conserved site				IPR018467
Dr00910	Transferase|Chloramphenicol acetyltransferase-like domain				IPR003480|IPR023213	GO:0016747
Dr00911		GO:0005739		epidermal patterning factor-like protein 4
Dr00912	RNA polymerase II, Rpb4|HRDC-like|RNA polymerase II, Rpb4, core				IPR005574|IPR010997|IPR006590	GO:0003899|GO:0006351|GO:0000166|GO:0003824|GO:0044237
Dr00913	Chlorophyllase	GO:0015996|GO:0043231|GO:0044444|GO:0047746	EC:3.1.1.14	chlorophyllase- chloroplast	IPR010821	GO:0015996|GO:0047746	EC:3.1.1.14	KEGG: 00860+3.1.1.14|MetaCyc: PWY-5098|MetaCyc: PWY-6927|MetaCyc: PWY-7164|UniPathway: UPA00674
Dr00914	Bax inhibitor 1-related	GO:0009826|GO:0016021|GO:0009742|GO:0005739		transmembrane bax inhibitor motif-containing protein	IPR006214
Dr00915	Bax inhibitor 1-related	GO:0016020		transmembrane bax inhibitor motif-containing protein	IPR006214
Dr00916
Dr00917
Dr00918	Myb/SANT-like domain				IPR024752
Dr00919
Dr00920
Dr00921	Sulphate transporter|STAS domain|Sulphate anion transporter, conserved site	GO:0016021|GO:0008271|GO:0008272|GO:0055085		sulfate bicarbonate oxalate exchanger and transporter sat-1	IPR011547|IPR002645|IPR018045	GO:0008272|GO:0015116|GO:0016021|GO:0008271
Dr00922		GO:0005739		uncharacterized protein
Dr00923
Dr00924	Protein kinase domain|Serine-threonine/tyrosine-protein kinase catalytic domain|Protein kinase-like domain|Serine/threonine- / dual specificity protein kinase, catalytic domain|Serine/threonine-protein kinase, active site	GO:0004715|GO:0005886|GO:0006468|GO:0005524|GO:0004674|GO:0009069	EC:2.7.10.2|EC:2.7.11.0	protein kinase	IPR000719|IPR011009|IPR001245|IPR002290|IPR008271	GO:0004672|GO:0005524|GO:0006468|GO:0016772|GO:0004674
Dr00925	Lipase, GDSL|SGNH hydrolase-type esterase domain	GO:0006629|GO:0016788		gdsl esterase lipase cprd49	IPR001087|IPR013831	GO:0006629|GO:0016788|GO:0016787
Dr00926	Endonuclease/exonuclease/phosphatase|Inositol polyphosphate-related phosphatase	GO:0046855|GO:0010305|GO:0052659|GO:0009737|GO:0052658|GO:0046854|GO:0004445|GO:0010588|GO:0010067|GO:0032957	EC:3.1.3.56	type i inositol- -trisphosphate 5-phosphatase cvp2-like	IPR005135|IPR000300	GO:0046856
Dr00927
Dr00928	Endonuclease/exonuclease/phosphatase|Zinc finger, CCHC-type	GO:0005488		retrotransposon line subclass	IPR005135|IPR001878	GO:0003676|GO:0008270
Dr00929	Bifunctional inhibitor/plant lipid transfer protein/seed storage helical domain|Plant lipid transfer protein/Par allergen	GO:0016023		non-specific lipid-transfer protein at2g13820-like	IPR016140|IPR000528	GO:0006869|GO:0008289
Dr00930	Protein of unknown function DUF581				IPR007650
Dr00931	WD40 repeat|WD40-repeat-containing domain|WD40/YVTN repeat-like-containing domain|WD40 repeat, conserved site				IPR001680|IPR017986|IPR015943|IPR019775	GO:0005515
Dr00932	Pentatricopeptide repeat|Tetratricopeptide-like helical				IPR002885|IPR011990	GO:0005515
Dr00933	Protein of unknown function DUF1677, plant				IPR012876
Dr00934
Dr00935
Dr00936	DWNN domain|Zinc finger, CCHC-type|Zinc finger, RING/FYVE/PHD-type				IPR014891|IPR001878|IPR013083	GO:0005634|GO:0008270|GO:0003676
Dr00937	Pentatricopeptide repeat|Tetratricopeptide-like helical	GO:0048364|GO:0005739|GO:0019287|GO:0019288|GO:0016125|GO:0034046|GO:0050790		pentatricopeptide repeat-containing protein	IPR002885|IPR011990	GO:0005515
Dr00938	Ovate protein family, C-terminal				IPR006458
Dr00939	Photosystem II Pbs27	GO:0009543|GO:0010207		low psii accumulation 19 protein	IPR025585
Dr00940	Probable transposase, Ptta/En/Spm, plant				IPR004252
Dr00941	Myosin head, motor domain|IQ motif, EF-hand binding site|Dil domain|Myosin, N-terminal, SH3-like|P-loop containing nucleoside triphosphate hydrolase|Dilute	GO:0016459|GO:0005524|GO:0003774|GO:0003779|GO:0006535|GO:0004124|GO:0009333	EC:2.5.1.47	myosin xi-f	IPR001609|IPR000048|IPR018444|IPR004009|IPR027417|IPR002710	GO:0003774|GO:0005524|GO:0016459|GO:0005515
Dr00942	Protein kinase domain|Protein kinase-like domain|Protein kinase, ATP binding site|Serine/threonine-protein kinase, active site	GO:0005886|GO:0006468|GO:0005524|GO:0004674|GO:0009069	EC:2.7.11.0	probable receptor-like protein kinase at5g56460-like	IPR000719|IPR011009|IPR017441|IPR008271	GO:0004672|GO:0005524|GO:0006468|GO:0016772|GO:0004674
Dr00943	Peptidase S8, subtilisin-related|Peptidase S8/S53 domain|Proteinase inhibitor I9|Peptidase S8, subtilisin, Ser-active site	GO:0005737|GO:0008152|GO:0008236		subtilisin-like serine endopeptidase family protein	IPR015500|IPR000209|IPR010259|IPR023828	GO:0004252|GO:0006508|GO:0042802|GO:0043086
Dr00944
Dr00945
Dr00946	Probable transposase, Ptta/En/Spm, plant				IPR004252
Dr00947	Chalcone isomerase	GO:0016872|GO:0016020|GO:0009536|GO:0005739		chalcone isomerase	IPR016087	GO:0016872
Dr00948
Dr00949
Dr00950	HNH endonuclease|HNH nuclease	GO:0004519|GO:0003676		protein	IPR002711|IPR003615	GO:0003676|GO:0004519
Dr00951		GO:0005730		atp gtp binding protein
Dr00952	Short-chain dehydrogenase/reductase SDR|Glucose/ribitol dehydrogenase|NAD(P)-binding domain|Short-chain dehydrogenase/reductase, conserved site	GO:0008152|GO:0016491		short-chain type	IPR002198|IPR016040|IPR002347|IPR020904	GO:0008152|GO:0016491
Dr00953
Dr00954	Tim44-like domain	GO:0005743		protein	IPR007379
Dr00955	F-box domain|Leucine-rich repeat, cysteine-containing subtype				IPR001810|IPR006553	GO:0005515
Dr00956	Glycosyl transferase, family 43	GO:0010417|GO:0010154|GO:0048367|GO:0010051|GO:0015018|GO:0042285|GO:0016020|GO:0005794|GO:0030206	EC:2.4.1.135	glycosyltransferase	IPR005027	GO:0015018|GO:0016020
Dr00957
Dr00958	DNA-directed RNA polymerase III subunit Rpc5				IPR006886	GO:0003899|GO:0005634|GO:0006351
Dr00959
Dr00960	Kinesin-like protein|Kinesin, motor domain|P-loop containing nucleoside triphosphate hydrolase|Kinesin, motor region, conserved site	GO:0044763|GO:0043234|GO:0044430|GO:0000166|GO:0015630		kinesin-like protein	IPR027640|IPR001752|IPR027417|IPR019821	GO:0003777|GO:0005871|GO:0007018|GO:0005524|GO:0008017
Dr00961	Ovarian tumour, otubain				IPR003323
Dr00962	RNA recognition motif domain|Polyadenylate-binding protein/Hyperplastic disc protein|Nucleotide-binding, alpha-beta plait|RNA recognition motif domain, eukaryote|Polyadenylate binding protein, human types 1, 2, 3, 4	GO:0003676		polyadenylate-binding protein 2-like	IPR000504|IPR002004|IPR012677|IPR003954|IPR006515	GO:0003676|GO:0003723|GO:0000166
Dr00963	Zinc finger, RING-type|Zinc finger, RING/FYVE/PHD-type	GO:0046872		zinc finger family protein	IPR001841|IPR013083	GO:0005515|GO:0008270
Dr00964
Dr00965	Protein of unknown function DUF3511				IPR021899
Dr00966	Aminotransferase-like, plant mobile domain				IPR019557
Dr00967	Nicotinamide N-methyltransferase-like	GO:0016023		methyltransferase-like protein 22-like	IPR019410
Dr00968
Dr00969	Transposase, MuDR, plant				IPR004332
Dr00970
Dr00971	GDP-fucose protein O-fucosyltransferase|O-fucosyltransferase, plant	GO:0009536|GO:0005794		duf246 domain-containing protein at1g04910-like	IPR019378|IPR024709		EC:2.4.1.221	KEGG: 00514+2.4.1.221|UniPathway: UPA00378
Dr00972	Ribosomal protein L10/L12|Ribosomal protein L10/acidic P0	GO:0005507|GO:0005730|GO:0009651|GO:0009409|GO:0003735|GO:0003906|GO:0006414|GO:0042254|GO:0010043|GO:0009507|GO:0046686|GO:0022626|GO:0005886|GO:0006284	EC:4.2.99.18	60s acidic ribosomal protein p0	IPR001813|IPR001790	GO:0003735|GO:0005622|GO:0005840|GO:0006414|GO:0042254
Dr00973	Leucine-rich repeat-containing N-terminal, type 2|Ubiquitin-conjugating enzyme/RWD-like	GO:0016023		leucine-rich repeat family protein	IPR013210|IPR016135
Dr00974
Dr00975
Dr00976	Poly(A) polymerase, central domain	GO:0043631|GO:0003723|GO:0004652|GO:0005634	EC:2.7.7.19	poly polymerase	IPR007012	GO:0004652|GO:0043631
Dr00977
Dr00978	Wall-associated receptor kinase galacturonan-binding domain	GO:0030247|GO:0006468|GO:0005524|GO:0004674|GO:0009069	EC:2.7.11.0	probable receptor-like protein kinase at1g67000-like	IPR025287	GO:0030247
Dr00979	Protein kinase domain|Protein kinase-like domain|Concanavalin A-like lectin/glucanase, subgroup|Serine/threonine- / dual specificity protein kinase, catalytic domain|Protein kinase, ATP binding site|Serine/threonine-protein kinase, active site	GO:0016023|GO:0004713|GO:0006468|GO:0005524|GO:0016020|GO:0004674|GO:0005739|GO:0009069	EC:2.7.10.0|EC:2.7.11.0	rust resistance kinase lr10	IPR000719|IPR011009|IPR013320|IPR002290|IPR017441|IPR008271	GO:0004672|GO:0005524|GO:0006468|GO:0016772|GO:0004674
Dr00980	Harbinger transposase-derived nuclease|Myb/SANT-like domain				IPR026103|IPR024752
Dr00981	Aminotransferase-like, plant mobile domain				IPR019557
Dr00982
Dr00983
Dr00984
Dr00985
Dr00986	NB-ARC|Disease resistance protein|P-loop containing nucleoside triphosphate hydrolase	GO:0000166		disease resistance protein rga4-like	IPR002182|IPR027417|IPR000767	GO:0043531|GO:0006952
Dr00987		GO:0009536		uncharacterized protein loc100831507
Dr00988	Aldehyde dehydrogenase domain|Aldehyde/histidinol dehydrogenase|Aldehyde dehydrogenase, C-terminal|Aldehyde dehydrogenase, N-terminal|Aldehyde dehydrogenase, conserved site	GO:0008152|GO:0016491		aldehyde dehydrogenase family 7 member a1	IPR015590|IPR016161|IPR016163|IPR016162|IPR016160	GO:0008152|GO:0016491|GO:0055114|GO:0016620
Dr00989	Mitochondrial substrate/solute carrier|Mitochondrial carrier domain	GO:0044765|GO:0044763|GO:0016020		probable mitochondrial 2-oxoglutarate malate carrier	IPR018108|IPR023395
Dr00990
Dr00991
Dr00992	Aminotransferase-like, plant mobile domain				IPR019557
Dr00993	Phox homologous domain|Ubiquitin system component Cue|UBA-like				IPR001683|IPR003892|IPR009060	GO:0005515|GO:0007154|GO:0035091
Dr00994	Signal peptidase 22kDa subunit|Geminivirus AL1 replication-associated protein, catalytic domain|Geminivirus AL1 replication-associated protein, CLV type	GO:0008233|GO:0016023|GO:0006465|GO:0005618|GO:0016021|GO:0005787		signal peptidase complex subunit 3b	IPR007653|IPR022690|IPR001301	GO:0005787|GO:0006465|GO:0008233|GO:0016021|GO:0006260|GO:0005198|GO:0019028	EC:3.4.-.-|EC:2.7.7.-	KEGG: 00310+3.4.-.-|KEGG: 00550+3.4.-.-|KEGG: 00780+3.4.-.-|KEGG: 00520+2.7.7.-
Dr00995	Tetratricopeptide-like helical|Tetratricopeptide repeat				IPR011990|IPR019734	GO:0005515
Dr00996	Synaptobrevin|Longin domain|Longin-like domain	GO:0005773|GO:0050896|GO:0006810|GO:0016020		vesicle-associated membrane protein 7c	IPR001388|IPR010908|IPR011012	GO:0016021|GO:0016192|GO:0006810
Dr00997	ACT domain	GO:0043168|GO:0008152		act domain-containing protein 3	IPR002912	GO:0008152|GO:0016597
Dr00998	Armadillo-type fold|Armadillo-like helical	GO:0008565|GO:0006606|GO:0005737|GO:0005634		importin subunit alpha-1	IPR016024|IPR011989	GO:0005488
Dr00999	HAT dimerisation domain, C-terminal|Domain of unknown function DUF4413|Ribonuclease H-like domain|Zinc finger, BED-type predicted				IPR008906|IPR025525|IPR012337|IPR003656	GO:0046983|GO:0003676|GO:0003677
Dr01000	DNA/RNA-binding domain, Est1-type|Telomerase activating protein Est1				IPR018834|IPR019458
Dr01001	DNA glycosylase/AP lyase, catalytic domain|DNA glycosylase/AP lyase, H2TH DNA-binding|Ribosomal protein S13-like, H2TH	GO:0003684|GO:0006289|GO:0008270|GO:0008534|GO:0006285	EC:3.2.2.23	formamidopyrimidine-dna glycosylase	IPR012319|IPR015886|IPR010979	GO:0003684|GO:0003906|GO:0006284|GO:0008270|GO:0016799|GO:0006289|GO:0003676
Dr01002	Glycosyl transferase, family 1|Sucrose-phosphate synthase|Sucrose phosphate synthase, plant	GO:0005986|GO:0005886|GO:0046524|GO:0005982	EC:2.4.1.14	sucrose phosphate synthase	IPR001296|IPR006380|IPR012819	GO:0009058|GO:0005985|GO:0046524	EC:2.4.1.14	KEGG: 00500+2.4.1.14|MetaCyc: PWY-7238|UniPathway: UPA00371
Dr01003	Domain of unknown function DUF2012|Carbohydrate-binding-like fold|Carboxypeptidase, regulatory domain	GO:0016023|GO:0005783|GO:0030246		uncharacterized protein	IPR019008|IPR013784|IPR014766	GO:0030246
Dr01004	C2 domain|Serine-threonine/tyrosine-protein kinase catalytic domain|Protein kinase-like domain|Serine/threonine- / dual specificity protein kinase, catalytic domain|Protein kinase domain|Protein kinase, ATP binding site|Serine/threonine-protein kinase, active site	GO:0012505|GO:0005886		plant synaptotagmin	IPR000008|IPR001245|IPR011009|IPR002290|IPR000719|IPR017441|IPR008271	GO:0005515|GO:0004672|GO:0006468|GO:0016772|GO:0005524|GO:0004674
Dr01005	MEMO1 family				IPR002737
Dr01006	MULE transposase domain				IPR018289
Dr01007	Peptidase C48, SUMO/Sentrin/Ubl1				IPR003653	GO:0006508|GO:0008234
Dr01008
Dr01009	Phosphoribosyltransferase domain	GO:0005739|GO:0009165|GO:0009116|GO:0005524|GO:0000287|GO:0016310|GO:0016301|GO:0004749|GO:0005886|GO:0006098|GO:0006144	EC:2.7.6.1	ribose-phosphate pyrophosphokinase 4	IPR000836	GO:0009116
Dr01010	Amino acid transporter, transmembrane	GO:0016021|GO:0009536		amino acid transporter	IPR013057
Dr01011	EF-hand domain|EF-hand domain pair|EF-Hand 1, calcium-binding site	GO:0005739|GO:0005509|GO:0009536		calcium uptake protein mitochondrial-like	IPR002048|IPR011992|IPR018247	GO:0005509
Dr01012
Dr01013		GO:0016020		uncharacterized protein
Dr01014	Protein of unknown function DUF597	GO:0008152		zinc-binding protein	IPR006734
Dr01015
Dr01016	NAD-dependent epimerase/dehydratase|NAD(P)-binding domain	GO:0047918|GO:0019853|GO:0050662|GO:0000166	EC:5.1.3.18	gdp-d-mannose-3 -epimerase	IPR001509|IPR016040	GO:0003824|GO:0044237|GO:0050662
Dr01017
Dr01018	Guanylate-binding protein, N-terminal|Guanylate-binding protein, C-terminal|P-loop containing nucleoside triphosphate hydrolase	GO:0016023|GO:0006184|GO:0003924|GO:0016020|GO:0005525		guanylate-binding protein 4-like	IPR015894|IPR003191|IPR027417	GO:0003924|GO:0005525
Dr01019	Glycoside hydrolase, family 18, catalytic domain|2S globulin|Glycoside hydrolase, superfamily|Glycoside hydrolase, catalytic domain|Glycoside hydrolase, chitinase active site	GO:0004553|GO:0005975|GO:0009057	EC:3.2.1.0	chitinase 1	IPR001223|IPR017853|IPR013781|IPR000677|IPR001579	GO:0004553|GO:0005975|GO:0003824	EC:3.2.1.14	KEGG: 00520+3.2.1.14|MetaCyc: PWY-6902
Dr01020
Dr01021	Glycoside hydrolase, family 18, catalytic domain|2S globulin|Glycoside hydrolase, superfamily|Glycoside hydrolase, catalytic domain	GO:0004553|GO:0005975	EC:3.2.1.0	chitinase 2-like	IPR001223|IPR017853|IPR013781|IPR000677	GO:0004553|GO:0005975|GO:0003824	EC:3.2.1.14	KEGG: 00520+3.2.1.14|MetaCyc: PWY-6902
Dr01022		GO:0016023		uncharacterized protein
Dr01023	Protein kinase domain|NAF domain|Protein kinase-like domain|Serine/threonine- / dual specificity protein kinase, catalytic domain|NAF/FISL domain|Protein kinase, ATP binding site|Serine/threonine-protein kinase, active site	GO:0009987|GO:0005739|GO:0016301		cbl-interacting serine threonine-protein kinase 7	IPR000719|IPR004041|IPR011009|IPR002290|IPR018451|IPR017441|IPR008271	GO:0004672|GO:0005524|GO:0006468|GO:0007165|GO:0016772|GO:0004674
Dr01024	Basic-leucine zipper domain|Basic leucine-zipper, C-terminal				IPR004827|IPR020983	GO:0003700|GO:0006355|GO:0043565
Dr01025	Tryptophan synthase, alpha chain|Ribulose-phosphate binding barrel|Aldolase-type TIM barrel	GO:0042742|GO:0004834|GO:0052544|GO:0009570|GO:0000162|GO:0006571|GO:0009094	EC:4.2.1.20	tryptophan synthase alpha chain	IPR002028|IPR011060|IPR013785	GO:0004834|GO:0006568|GO:0003824|GO:0008152	EC:4.2.1.20	KEGG: 00260+4.2.1.20|KEGG: 00400+4.2.1.20|UniPathway: UPA00035
Dr01026	Sec-independent protein translocase protein TatA/B/E|Twin-arginine translocation protein TatB-like|Sec-independent protein translocase protein TatA/E	GO:0009977|GO:0009306|GO:0033281|GO:0009941|GO:0045038|GO:0031361|GO:0009535|GO:0043953		sec-independent protein translocase protein	IPR003369|IPR003998|IPR006312	GO:0008565|GO:0015031|GO:0009306|GO:0016020|GO:0005886|GO:0016021
Dr01027	Myc-type, basic helix-loop-helix (bHLH) domain				IPR011598	GO:0046983
Dr01028	NADH-quinone oxidoreductase subunit E like|Thioredoxin-like fold	GO:0006120|GO:0005488|GO:0008137|GO:0005747|GO:0006744|GO:0006814|GO:0015992	EC:1.6.5.3	protein	IPR002023|IPR012336	GO:0016491|GO:0055114
Dr01029
Dr01030	rRNA-processing protein EFG1				IPR019310
Dr01031	Single-strand DNA-binding|Primosome PriB/single-strand DNA-binding|Nucleic acid-binding, OB-fold	GO:0006260|GO:0003697|GO:0005739		single-stranded dna-binding protein	IPR011344|IPR000424|IPR012340	GO:0003697|GO:0006260
Dr01032	Glycoside hydrolase, family 47	GO:0016020|GO:0004812|GO:0004571|GO:0005739|GO:0005509|GO:0006418|GO:0005975	EC:3.2.1.113	probable alpha-mannosidase i mns4-like	IPR001382	GO:0004571|GO:0005509|GO:0016020
Dr01033	Single-strand DNA-binding|Primosome PriB/single-strand DNA-binding|Nucleic acid-binding, OB-fold	GO:0003677|GO:0009536		single-strand binding protein	IPR011344|IPR000424|IPR012340	GO:0003697|GO:0006260
Dr01034	AUX/IAA protein|Aux/IAA-ARF-dimerisation	GO:0006355|GO:0046983|GO:0009734|GO:0005634		indole-3-acetic acid inducible 4	IPR003311|IPR011525	GO:0005634|GO:0006355|GO:0046983
Dr01035	AUX/IAA protein|Aux/IAA-ARF-dimerisation	GO:0010102|GO:0009753|GO:0006417|GO:0009414|GO:0009416|GO:0006355|GO:0009611|GO:0009536|GO:0046983|GO:0009630|GO:0009734|GO:0005634		auxin-responsive protein	IPR003311|IPR011525	GO:0005634|GO:0006355|GO:0046983
Dr01036	Phospholipase/carboxylesterase/thioesterase				IPR003140	GO:0016787
Dr01037	Protein of unknown function DUF247, plant				IPR004158
Dr01038
Dr01039	Protein of unknown function DUF247, plant				IPR004158
Dr01040	Protein of unknown function DUF247, plant				IPR004158
Dr01041	Protein of unknown function DUF247, plant				IPR004158
Dr01042
Dr01043	Arf GTPase activating protein	GO:0007275		probable adp-ribosylation factor gtpase-activating protein agd8-like	IPR001164	GO:0008060|GO:0008270|GO:0032312
Dr01044		GO:0005829		transducin wd40 domain-containing protein
Dr01045
Dr01046		GO:0050896		e3 ubiquitin-protein ligase bah1
Dr01047	Peroxisomal membrane protein 14|Peroxisome membrane anchor protein Pex14p, N-terminal				IPR025655|IPR006785	GO:0005515|GO:0005778|GO:0016560
Dr01048	Peptidase C48, SUMO/Sentrin/Ubl1				IPR003653	GO:0006508|GO:0008234
Dr01049	Zinc finger, CCHC-type				IPR001878	GO:0003676|GO:0008270
Dr01050
Dr01051	Rab-GTPase-TBC domain	GO:0005622		tbc1 domain family member	IPR000195	GO:0005097|GO:0032313
Dr01052
Dr01053
Dr01054	Protein of unknown function DUF639|Zinc finger, CCHC-type				IPR006927|IPR001878	GO:0003676|GO:0008270
Dr01055
Dr01056	Phosphoribulokinase/uridine kinase|P-loop containing nucleoside triphosphate hydrolase	GO:0004849|GO:0016310|GO:0009507|GO:0006222|GO:0048285|GO:0005524|GO:0006206	EC:2.7.1.48	atp binding	IPR006083|IPR027417	GO:0005524|GO:0008152|GO:0016301
Dr01057	Magnesium transporter MRS2/LPE10|Mg2+ transporter protein, CorA-like/Zinc transport protein ZntB	GO:0030001|GO:0016020|GO:0046873		magnesium transporter	IPR026573|IPR002523	GO:0015095|GO:0015693|GO:0016020|GO:0030001|GO:0046873|GO:0055085
Dr01058	Exocyst complex subunit Sec15-like	GO:0044763|GO:0044707|GO:0044444|GO:0009856		probable exocyst complex component 6-like	IPR007225	GO:0000145|GO:0006904
Dr01059	Zinc finger, RING/FYVE/PHD-type|Zinc finger, RING-type|Zinc finger, RING-type, conserved site				IPR013083|IPR001841|IPR017907	GO:0005515|GO:0008270
Dr01060
Dr01061	Linker histone H1/H5, domain H15|Winged helix-turn-helix DNA-binding domain	GO:0000786|GO:0003677|GO:0006334|GO:0005634		histone-like protein	IPR005818|IPR011991	GO:0000786|GO:0003677|GO:0005634|GO:0006334
Dr01062
Dr01063	DNA-binding WRKY|Zn-cluster domain	GO:0003677		wrky transcription factor 39	IPR003657|IPR018872	GO:0003700|GO:0006355|GO:0043565
Dr01064	Dedicator of cytokinesis|Dedicator of cytokinesis C-terminal|DHR-1 domain|Armadillo-type fold|DHR-2 domain	GO:0005085|GO:0019898|GO:0005886|GO:0016192|GO:0070971|GO:0005634|GO:0005829|GO:0007264|GO:0043087		protein	IPR026791|IPR010703|IPR027007|IPR016024|IPR027357	GO:0005085|GO:0007264|GO:0005488
Dr01065	Linker histone H1/H5, domain H15|Histone H5|Winged helix-turn-helix DNA-binding domain	GO:0000786|GO:0003677|GO:0006334|GO:0005634		histone-like protein	IPR005818|IPR011991|IPR005819	GO:0000786|GO:0003677|GO:0005634|GO:0006334
Dr01066
Dr01067	Zeta toxin domain|P-loop containing nucleoside triphosphate hydrolase				IPR010488|IPR027417	GO:0005524|GO:0016301
Dr01068	Ku70|Ku70/Ku80 beta-barrel domain|Ku70/Ku80, N-terminal alpha/beta|SPOC like C-terminal domain|Ku70/Ku80 C-terminal arm|von Willebrand factor, type A	GO:0006281|GO:0000723|GO:0003677|GO:0005515|GO:0004386|GO:0005634		atp-dependent dna helicase 2 subunit ku70	IPR006165|IPR006164|IPR005161|IPR016194|IPR005160|IPR002035	GO:0000723|GO:0003677|GO:0003684|GO:0005634|GO:0006303|GO:0042162|GO:0043564|GO:0004003		Reactome: REACT_216|Reactome: REACT_6185
Dr01069	Ku70/Ku80 C-terminal arm	GO:0006281|GO:0005739|GO:0000723|GO:0003677|GO:0005515|GO:0004386|GO:0005634		atp-dependent dna helicase 2 subunit ku70	IPR005160	GO:0003677|GO:0004003|GO:0006303		Reactome: REACT_216|Reactome: REACT_6185
Dr01070	START domain|START-like domain				IPR002913|IPR023393	GO:0008289
Dr01071	Glutathione S-transferase, N-terminal|Glutathione S-transferase, C-terminal-like|Thioredoxin-like fold	GO:0016772|GO:0005488|GO:0016020		glutathione s-	IPR004045|IPR010987|IPR012336	GO:0005515
Dr01072		GO:0009536		protein
Dr01073	K Homology domain, type 1|K Homology domain				IPR004088|IPR004087	GO:0003723
Dr01074
Dr01075
Dr01076	TPX2, C-terminal domain	GO:0009536		protein	IPR027329
Dr01077
Dr01078
Dr01079
Dr01080	Zein-binding domain				IPR007656
Dr01081	Proteinase inhibitor I13, potato inhibitor I				IPR000864	GO:0004867|GO:0009611
Dr01082	Gamma-tubulin complex component protein				IPR007259	GO:0000226|GO:0000922|GO:0005815		Reactome: REACT_152
Dr01083	SS18 family				IPR007726
Dr01084
Dr01085	Probable transposase, Ptta/En/Spm, plant				IPR004252
Dr01086	MATH|TRAF-like				IPR002083|IPR008974	GO:0005515
Dr01087	FMP27, C-terminal	GO:0016023		golgi-body localisation and rna pol ii promoter fmp27 domain-containing protein	IPR019443
Dr01088	Ubiquitin-conjugating enzyme, E2|Ubiquitin-conjugating enzyme/RWD-like|Ubiquitin-conjugating enzyme, active site	GO:0009965|GO:0016579|GO:0009739|GO:0016567|GO:0009910|GO:0004842	EC:6.3.2.19	ubiquitin-conjugating enzyme e2-18	IPR000608|IPR016135|IPR023313	GO:0016881		UniPathway: UPA00143
Dr01089	Thioredoxin|Thioredoxin domain|Thioredoxin-like fold|Thioredoxin, conserved site	GO:0005737|GO:0016671|GO:0009055|GO:0045454|GO:0006662|GO:0015035|GO:0022900|GO:0006118	EC:1.8.4.0	thioredoxin h	IPR005746|IPR013766|IPR012336|IPR017937	GO:0006662|GO:0015035|GO:0045454
Dr01090	Zinc finger, PHD-finger|Bromo adjacent homology (BAH) domain|Zinc finger, FYVE/PHD-type|Zinc finger, RING/FYVE/PHD-type|Zinc finger, PHD-type|Zinc finger, PHD-type, conserved site	GO:0003677|GO:0009791|GO:0005634|GO:0008270		ebs-bah-phd domain-containing protein	IPR019787|IPR001025|IPR011011|IPR013083|IPR001965|IPR019786	GO:0005515|GO:0003677|GO:0008270
Dr01091	GTP-binding protein Obg/CgtA|GTP1/OBG domain|GTP binding domain|P-loop containing nucleoside triphosphate hydrolase|Small GTP-binding protein domain|GTP1/OBG, conserved site	GO:0006184|GO:0000287|GO:0003924|GO:0005525		gtpase obg-like	IPR014100|IPR006169|IPR006073|IPR027417|IPR005225|IPR006074	GO:0000287|GO:0003924|GO:0005525
Dr01092	Tetratricopeptide-like helical				IPR011990	GO:0005515
Dr01093	WD40 repeat|WD40-repeat-containing domain|WD40/YVTN repeat-like-containing domain|WD40 repeat, conserved site	GO:0009536		wd repeat-containing protein 13-like	IPR001680|IPR017986|IPR015943|IPR019775	GO:0005515
Dr01094	Ankyrin repeat domain-containing protein 13				IPR021832
Dr01095
Dr01096	Ankyrin repeat domain-containing protein 13|Ankyrin repeat-containing domain				IPR021832|IPR020683
Dr01097	Leucine-rich repeat-containing N-terminal, type 2				IPR013210
Dr01098	Phosphoesterase domain|Iron/zinc purple acid phosphatase-like C-terminal domain|Purple acid phosphatase-like, N-terminal|Purple acid phosphatase, N-terminal	GO:0005615|GO:0009505|GO:0003993|GO:0030145|GO:0016023|GO:0016036|GO:0006771|GO:0019497	EC:3.1.3.2	purple acid phosphatase	IPR004843|IPR025733|IPR008963|IPR015914	GO:0016787|GO:0003993|GO:0046872
Dr01099	Protein phosphatase 2A, regulatory B subunit, B56|Armadillo-type fold	GO:0000159|GO:0007165|GO:0008601		serine threonine protein phosphatase 2a 57 kda regulatory subunit b beta isoform-like	IPR002554|IPR016024	GO:0000159|GO:0007165|GO:0008601|GO:0005488		Reactome: REACT_11045|Reactome: REACT_152|Reactome: REACT_383|Reactome: REACT_6900
Dr01100	Mitochodrial transcription termination factor-related				IPR003690
Dr01101
Dr01102	ATPase, AAA-type, core|P-loop containing nucleoside triphosphate hydrolase|AAA+ ATPase domain	GO:0003676|GO:0005524|GO:0017111|GO:0009507|GO:0005739	EC:3.6.1.15	p-loop containing nucleoside triphosphate hydrolase family protein	IPR003959|IPR027417|IPR003593	GO:0005524|GO:0000166|GO:0017111
Dr01103	Cytokinin riboside 5'-monophosphate phosphoribohydrolase LOG				IPR005269
Dr01104
Dr01105	RNA recognition motif domain|Zinc finger, CCHC-type|Nucleotide-binding, alpha-beta plait				IPR000504|IPR001878|IPR012677	GO:0003676|GO:0008270|GO:0000166
Dr01106		GO:0044765|GO:0044763|GO:0005739		sec12-like protein 1-like
Dr01107	WD40 repeat|WD40-repeat-containing domain|WD40/YVTN repeat-like-containing domain	GO:0044699|GO:0005739		sec12-like protein 1-like	IPR001680|IPR017986|IPR015943	GO:0005515
Dr01108	HSP20-like chaperone	GO:0006260|GO:0000166|GO:0044464		calcyclin-binding protein	IPR008978
Dr01109	Aspartic peptidase|Aspartic peptidase domain	GO:0016023|GO:0008233		aspartic proteinase-like protein 2-like	IPR001461|IPR021109	GO:0004190|GO:0006508
Dr01110	RNA recognition motif domain|Polyadenylate-binding protein/Hyperplastic disc protein|Nucleotide-binding, alpha-beta plait|RNA recognition motif domain, eukaryote|Polyadenylate binding protein, human types 1, 2, 3, 4	GO:0016023|GO:0003676		probable polyadenylate-binding protein at2g36660-like	IPR000504|IPR002004|IPR012677|IPR003954|IPR006515	GO:0003676|GO:0003723|GO:0000166
Dr01111	Argonaute/Dicer protein, PAZ domain|Stem cell self-renewal protein Piwi|Domain of unknown function DUF1785|Ribonuclease H-like domain	GO:0033169|GO:0065008|GO:0007143|GO:0035194|GO:0035197|GO:0048513|GO:0055046|GO:0007140|GO:0005731|GO:0044767|GO:0009561|GO:0045087|GO:0005739		protein argonaute	IPR003100|IPR003165|IPR014811|IPR012337	GO:0005515|GO:0003676		Reactome: REACT_12472
Dr01112	Peptidyl-prolyl cis-trans isomerase, FKBP-type|Peptidyl-prolyl cis-trans isomerase, FKBP-type, domain	GO:0000413|GO:0004672|GO:0006457|GO:0003755|GO:0009535|GO:0000166	EC:5.2.1.8	fk506-binding protein	IPR023566|IPR001179	GO:0006457
Dr01113	Zinc finger, GATA-type|Tify|CCT domain|Zinc finger, NHR/GATA-type	GO:0003700|GO:0043565|GO:0008270|GO:0006355|GO:0005667|GO:0045449		gata transcription factor 25	IPR000679|IPR010399|IPR010402|IPR013088	GO:0003700|GO:0006355|GO:0008270|GO:0043565|GO:0005515
Dr01114	Aminotransferase class-III|Pyridoxal phosphate-dependent transferase|Pyridoxal phosphate-dependent transferase, major region, subdomain 2	GO:0006979|GO:0009450|GO:0006540|GO:0008270|GO:0005739|GO:0050897|GO:0009865|GO:0010154|GO:0019484|GO:0034387|GO:0010183|GO:0046686|GO:0030170|GO:0010033|GO:0005886		uncharacterized aminotransferase y4ub-like	IPR005814|IPR015424|IPR015422	GO:0008483|GO:0030170|GO:0003824
Dr01115	PPPDE putative peptidase domain|Pyridoxal phosphate-dependent transferase|Pyridoxal phosphate-dependent transferase, major region, subdomain 1	GO:0030170|GO:0008152|GO:0005739|GO:0008483	EC:2.6.1.0	erebp-4 like protein	IPR008580|IPR015424|IPR015421	GO:0003824|GO:0030170	EC:3.4.-.-	KEGG: 00310+3.4.-.-|KEGG: 00550+3.4.-.-|KEGG: 00780+3.4.-.-
Dr01116	Aminotransferase class-III|Pyridoxal phosphate-dependent transferase|Pyridoxal phosphate-dependent transferase, major region, subdomain 1|Pyridoxal phosphate-dependent transferase, major region, subdomain 2	GO:0006979|GO:0009450|GO:0006540|GO:0008270|GO:0005739|GO:0050897|GO:0009865|GO:0003992|GO:0010154|GO:0019484|GO:0034387|GO:0010183|GO:0046686|GO:0030170|GO:0010033|GO:0005886|GO:0000051	EC:2.6.1.11	uncharacterized aminotransferase y4ub-like	IPR005814|IPR015424|IPR015421|IPR015422	GO:0008483|GO:0030170|GO:0003824
Dr01117
Dr01118	Isopenicillin N synthase-like				IPR027443
Dr01119	Oxoglutarate/iron-dependent dioxygenase|Isopenicillin N synthase-like	GO:0016706	EC:1.14.11.0	2-oxoglutarate-dependent dioxygenase	IPR005123|IPR027443	GO:0016491|GO:0016706|GO:0055114
Dr01120	Non-haem dioxygenase N-terminal domain|Isopenicillin N synthase-like				IPR026992|IPR027443
Dr01121
Dr01122	UDP-glucuronosyl/UDP-glucosyltransferase	GO:0035251		udp-glycosyltransferase 85a2-like	IPR002213	GO:0008152|GO:0016758
Dr01123	ATPase, AAA-type, core|Peptidase M41|P-loop containing nucleoside triphosphate hydrolase|AAA+ ATPase domain	GO:0009793|GO:0008568|GO:0051301|GO:0009507|GO:0004222|GO:0006508|GO:0005524|GO:0005739	EC:3.6.4.3|EC:3.4.24.0	cell division protein	IPR003959|IPR000642|IPR027417|IPR003593	GO:0005524|GO:0004222|GO:0006508|GO:0000166|GO:0017111
Dr01124	Transketolase-like, pyrimidine-binding domain|Transketolase, C-terminal|Transketolase, C-terminal/Pyruvate-ferredoxin oxidoreductase, domain II	GO:0016491|GO:0008152|GO:0009507		pyruvate dehydrogenase e1 beta subunit	IPR005475|IPR005476|IPR009014	GO:0003824|GO:0008152
Dr01125	Protein of unknown function DUF1365	GO:0016023		uncharacterized protein	IPR010775
Dr01126	Ubiquitin carboxyl-terminal hydrolases family 2|Peptidase C19, ubiquitin carboxyl-terminal hydrolase 2, conserved site	GO:0006511|GO:0004221|GO:0008233|GO:0016579	EC:3.1.2.15	ubiquitin carboxyl-terminal hydrolase 25-like	IPR001394|IPR018200	GO:0004221|GO:0006511
Dr01127	Peptidase S1C|Trypsin-like cysteine/serine peptidase domain	GO:0010206|GO:0004252|GO:0009543|GO:0032440|GO:0006508|GO:0055114	EC:3.4.21.0|EC:1.3.1.74	protease do-like 5	IPR009003|IPR001940	GO:0003824|GO:0004252|GO:0006508
Dr01128	Pentatricopeptide repeat|Tetratricopeptide-like helical				IPR002885|IPR011990	GO:0005515
Dr01129	Pentatricopeptide repeat|Ankyrin repeat-containing domain	GO:0005739		pentatricopeptide repeat-containing	IPR002885|IPR020683
Dr01130	Snf7|Early nodulin 93 ENOD93 protein				IPR005024|IPR005050	GO:0015031
Dr01131
Dr01132	BTB/POZ fold				IPR011333
Dr01133
Dr01134	Kinesin-like protein|Kinesin, motor domain|Malectin|P-loop containing nucleoside triphosphate hydrolase|Kinesin, motor region, conserved site	GO:0044430|GO:0000166|GO:0003777|GO:0005874|GO:0007017		atp binding	IPR027640|IPR001752|IPR021720|IPR027417|IPR019821	GO:0003777|GO:0005871|GO:0007018|GO:0005524|GO:0008017
Dr01135	General substrate transporter|Sugar/inositol transporter|Major facilitator superfamily domain, general substrate transporter|Major facilitator superfamily domain|Sugar transporter, conserved site	GO:0015798|GO:0005886|GO:0055085|GO:0016021|GO:0005366|GO:0006812|GO:0008643		probable inositol transporter 2-like	IPR005828|IPR016196|IPR003663|IPR020846|IPR005829	GO:0016021|GO:0022857|GO:0055085|GO:0016020|GO:0022891|GO:0005215|GO:0006810		Reactome: REACT_15518
Dr01136	F-box domain				IPR001810	GO:0005515
Dr01137	Peptidase C48, SUMO/Sentrin/Ubl1				IPR003653	GO:0006508|GO:0008234
Dr01138	Protein kinase domain|Leucine-rich repeat|Leucine-rich repeat-containing N-terminal, type 2|Protein kinase-like domain|Concanavalin A-like lectin/glucanase, subgroup|Serine/threonine- / dual specificity protein kinase, catalytic domain|Leucine-rich repeat, typical subtype|Serine/threonine-protein kinase, active site	GO:0006468|GO:0004674|GO:0016023|GO:0000166|GO:0016020|GO:0009069	EC:2.7.11.0	leucine-rich repeat receptor-like serine threonine-protein kinase at1g17230-like	IPR000719|IPR001611|IPR013210|IPR011009|IPR013320|IPR002290|IPR003591|IPR008271	GO:0004672|GO:0005524|GO:0006468|GO:0005515|GO:0016772|GO:0004674
Dr01139	Glutathione S-transferase, N-terminal|Glutathione S-transferase, C-terminal-like|Thioredoxin-like fold	GO:0003824|GO:0006950		protein	IPR004045|IPR010987|IPR012336	GO:0005515
Dr01140	Glutathione S-transferase, C-terminal|Glutathione S-transferase, N-terminal|Glutathione S-transferase, C-terminal-like|Thioredoxin-like fold	GO:0006979|GO:0016829|GO:0009409|GO:0009635|GO:0006749|GO:0016740|GO:0042631|GO:0009570|GO:0043295|GO:0046686|GO:0080167|GO:0005886|GO:0048046		protein	IPR004046|IPR004045|IPR010987|IPR012336	GO:0005515
Dr01141	Glutathione S-transferase, C-terminal|Glutathione S-transferase, N-terminal|Glutathione S-transferase, C-terminal-like|Thioredoxin-like fold	GO:0006979|GO:0016829|GO:0009409|GO:0009635|GO:0006749|GO:0016740|GO:0042631|GO:0009570|GO:0043295|GO:0046686|GO:0080167|GO:0005886|GO:0048046		protein	IPR004046|IPR004045|IPR010987|IPR012336	GO:0005515
Dr01142
Dr01143	Glutathione S-transferase, C-terminal|Glutathione S-transferase, N-terminal|Glutathione S-transferase, C-terminal-like|Thioredoxin-like fold	GO:0009987|GO:0010035|GO:0016829|GO:0009628|GO:0016740|GO:0009507|GO:0006950		protein	IPR004046|IPR004045|IPR010987|IPR012336	GO:0005515
Dr01144	Domain of unknown function DUF221|Domain of unknown function DUF4463	GO:0016023|GO:0005773|GO:0009941|GO:0005886		uncharacterized membrane	IPR003864|IPR027815	GO:0016020
Dr01145	Lipase, class 3	GO:0004806|GO:0016042|GO:0046486	EC:3.1.1.3	lipase class 3 family protein	IPR002921	GO:0004806|GO:0006629		Reactome: REACT_14797|Reactome: REACT_604
Dr01146		GO:0004386|GO:0003676|GO:0000166		dead-box atp-dependent rna helicase 24
Dr01147	Ribulose-phosphate 3-epimerase-like|Ribulose-phosphate binding barrel|Aldolase-type TIM barrel	GO:0019253|GO:0006098|GO:0046872|GO:0009409|GO:0009941|GO:0009535|GO:0009570|GO:0004750|GO:0009624|GO:0010319|GO:0048046|GO:0015976	EC:5.1.3.1	ribulose-phosphate 3- chloroplastic-like	IPR000056|IPR011060|IPR013785	GO:0005975|GO:0016857|GO:0003824|GO:0008152	EC:5.1.3.1	KEGG: 00030+5.1.3.1|KEGG: 00040+5.1.3.1|KEGG: 00710+5.1.3.1|MetaCyc: PWY-1861|MetaCyc: PWY-5723
Dr01148	Pyridoxal phosphate-dependent decarboxylase|Aromatic-L-amino-acid decarboxylase|Pyridoxal phosphate-dependent transferase|Pyridoxal phosphate-dependent transferase, major region, subdomain 1|Pyridoxal phosphate-dependent transferase, major region, subdomain 2|Pyridoxal-phosphate binding site	GO:0030170|GO:0004837|GO:0004058|GO:0006570|GO:0009821|GO:0006547|GO:0006558|GO:0006568|GO:0042432	EC:4.1.1.25|EC:4.1.1.28	tyrosine dopa decarboxylase	IPR002129|IPR015424|IPR015421|IPR015422|IPR010977|IPR021115	GO:0016831|GO:0019752|GO:0030170|GO:0003824|GO:0006520
Dr01149	Pyridoxal phosphate-dependent decarboxylase|Aromatic-L-amino-acid decarboxylase|Pyridoxal phosphate-dependent transferase|Pyridoxal phosphate-dependent transferase, major region, subdomain 1|Pyridoxal phosphate-dependent transferase, major region, subdomain 2|Pyridoxal-phosphate binding site	GO:0030170|GO:0004837|GO:0004058|GO:0006570|GO:0009821|GO:0006547|GO:0006558|GO:0006568|GO:0042432	EC:4.1.1.25|EC:4.1.1.28	tyrosine dopa decarboxylase	IPR002129|IPR015424|IPR015421|IPR015422|IPR010977|IPR021115	GO:0016831|GO:0019752|GO:0030170|GO:0003824|GO:0006520
Dr01150	Breast cancer type 1 susceptibility protein (BRCA1)|BRCT domain|Zinc finger, RING/FYVE/PHD-type|Zinc finger, RING-type|Zinc finger, RING-type, conserved site	GO:0046872		protein breast cancer susceptibility 1 homolog	IPR011364|IPR001357|IPR013083|IPR001841|IPR017907	GO:0003677|GO:0004842|GO:0005634|GO:0006281|GO:0008270|GO:0005515	EC:6.3.2.-	KEGG: 00300+6.3.2.-|KEGG: 00380+6.3.2.-|UniPathway: UPA00143
Dr01151	Glycosyl transferase, family 31|Galectin, carbohydrate recognition domain|Concanavalin A-like lectin/glucanases superfamily|Concanavalin A-like lectin/glucanase, subgroup	GO:0005794|GO:0030246|GO:0008378|GO:0006486|GO:0016021|GO:0005739		probable beta- -galactosyltransferase 20-like	IPR002659|IPR001079|IPR008985|IPR013320	GO:0006486|GO:0008378|GO:0016020|GO:0030246		UniPathway: UPA00378
Dr01152
Dr01153
Dr01154		GO:0009536		plastid transcriptionally active 12
Dr01155	Probable transposase, Ptta/En/Spm, plant				IPR004252
Dr01156	BTB/POZ|NPH3 domain|Aminotransferase-like, plant mobile domain|BTB/POZ fold|BTB/POZ-like	GO:0000786|GO:0003677|GO:0006334|GO:0003682|GO:0005886|GO:0005634		btb poz domain-containing protein at1g30440-like	IPR013069|IPR027356|IPR019557|IPR011333|IPR000210	GO:0005515		UniPathway: UPA00143
Dr01157
Dr01158	Leucine rich repeat 4|Leucine-rich repeat	GO:0009536		air9 protein	IPR025875|IPR001611	GO:0005515
Dr01159	Ubiquitin-conjugating enzyme, E2|Ubiquitin-conjugating enzyme/RWD-like|Ubiquitin-conjugating enzyme, active site	GO:0016579|GO:0004842|GO:0016567	EC:6.3.2.19	protein	IPR000608|IPR016135|IPR023313	GO:0016881		UniPathway: UPA00143
Dr01160	Translation elongation factor EFTu/EF1A, C-terminal	GO:1901363|GO:0043231|GO:0097159|GO:0044444		elongation factor 1 alpha	IPR004160	GO:0005525
Dr01161		GO:0016740|GO:0044424		thymidylate kinase
Dr01162	AMP-dependent synthetase/ligase	GO:0016874|GO:0008152		acyl-activating enzyme 14	IPR000873	GO:0003824|GO:0008152
Dr01163	ATPase, BadF/BadG/BcrA/BcrD type	GO:0016301|GO:0016310		n-acetyl-d-glucosamine kinase	IPR002731
Dr01164	Thaumatin|Thaumatin, conserved site	GO:0050832|GO:0005576|GO:0031640		thaumatin-like protein	IPR001938|IPR017949
Dr01165	RNA recognition motif domain|Nucleotide-binding, alpha-beta plait				IPR000504|IPR012677	GO:0003676|GO:0000166
Dr01166	Thaumatin|Thaumatin, conserved site	GO:0050832|GO:0005576|GO:0031640		thaumatin-like protein	IPR001938|IPR017949
Dr01167	Short-chain dehydrogenase/reductase SDR|Glucose/ribitol dehydrogenase|NAD(P)-binding domain	GO:0016491|GO:0055114|GO:0000166		uncharacterized oxidoreductase -like	IPR002198|IPR016040|IPR002347	GO:0008152|GO:0016491
Dr01168	GTP binding domain|Domain of unknown function DUF933|P-loop containing nucleoside triphosphate hydrolase|TGS-like|TGS-like domain|Beta-grasp domain|Conserved hypothetical protein CHP00092	GO:0005525|GO:0009570|GO:0005739		gtp-dependent nucleic acid-binding protein engd-like	IPR006073|IPR013029|IPR027417|IPR012676|IPR023192|IPR012675|IPR004396	GO:0005525	EC:6.1.1.3	KEGG: 00970+6.1.1.3
Dr01169	Protein kinase domain|Protein kinase, C-terminal|Protein kinase-like domain|Pleckstrin homology-like domain|AGC-kinase, C-terminal|Serine/threonine- / dual specificity protein kinase, catalytic domain|Protein kinase, ATP binding site|Serine/threonine-protein kinase, active site	GO:0009524|GO:0005886|GO:0006468|GO:0005524|GO:0005634|GO:0005829|GO:0004674|GO:0009069	EC:2.7.11.0	protein	IPR000719|IPR017892|IPR011009|IPR011993|IPR000961|IPR002290|IPR017441|IPR008271	GO:0004672|GO:0005524|GO:0006468|GO:0004674|GO:0016772
Dr01170
Dr01171	Pentatricopeptide repeat|Tetratricopeptide-like helical				IPR002885|IPR011990	GO:0005515
Dr01172
Dr01173	Ubiquitin fusion degradation protein UFD1	GO:0006511		ubiquitin fusion degradation protein	IPR004854	GO:0006511
Dr01174
Dr01175	Ubiquitin carboxyl-terminal hydrolases family 2	GO:0043231|GO:0016787		ubiquitin carboxyl-terminal hydrolase 24	IPR001394	GO:0004221|GO:0006511
Dr01176
Dr01177		GO:0003676		sap-like protein
Dr01178
Dr01179	Methyltransferase-related	GO:0032259|GO:0009536|GO:0008168	EC:2.1.1.0	ribosomal rna-processing protein 8	IPR007823	GO:0008168	EC:2.1.1.-	KEGG: 00130+2.1.1.-|KEGG: 00253+2.1.1.-|KEGG: 00270+2.1.1.-|KEGG: 00340+2.1.1.-|KEGG: 00350+2.1.1.-|KEGG: 00360+2.1.1.-|KEGG: 00380+2.1.1.-|KEGG: 00450+2.1.1.-|KEGG: 00522+2.1.1.-|KEGG: 00624+2.1.1.-|KEGG: 00627+2.1.1.-|KEGG: 00860+2.1.1.-|KEGG: 00940+2.1.1.-|KEGG: 00941+2.1.1.-|KEGG: 00942+2.1.1.-|KEGG: 00945+2.1.1.-|KEGG: 00950+2.1.1.-|KEGG: 00981+2.1.1.-
Dr01180
Dr01181
Dr01182
Dr01183
Dr01184	Ubiquitin carboxyl-terminal hydrolases family 2	GO:0043231|GO:0016787		ubiquitin carboxyl-terminal hydrolase 24	IPR001394	GO:0004221|GO:0006511
Dr01185
Dr01186		GO:0043231|GO:0003746|GO:0005525|GO:0006184|GO:0003924|GO:0005840|GO:0006448		elongation factor 1-alpha
Dr01187
Dr01188	Wall-associated receptor kinase galacturonan-binding domain	GO:0016023		protein	IPR025287	GO:0030247
Dr01189
Dr01190
Dr01191	Cytochrome P450|Cytochrome P450, E-class, group IV	GO:0046872|GO:0016491|GO:0016829		hydroperoxide lyase	IPR001128|IPR002403	GO:0005506|GO:0016705|GO:0020037|GO:0055114|GO:0004497		Reactome: REACT_13433
Dr01192
Dr01193	Transposase, MuDR, plant				IPR004332
Dr01194
Dr01195
Dr01196	Condensin complex subunit 2/barren				IPR022816
Dr01197
Dr01198	Pentatricopeptide repeat				IPR002885
Dr01199	Plant organelle RNA recognition domain	GO:0005739		ubiquitin carboxyl-terminal hydrolase-like protein	IPR021099
Dr01200	Prephenate dehydrogenase|6-phosphogluconate dehydrogenase, C-terminal-like|NAD(P)-binding domain	GO:0006571|GO:0008977|GO:0009507|GO:0004665|GO:0005739|GO:0000166|GO:0055114|GO:0000162|GO:0009094	EC:1.3.1.12|EC:1.3.1.13	arogenate dehydrogenase chloroplastic-like	IPR003099|IPR008927|IPR016040	GO:0004665|GO:0006571|GO:0008977|GO:0055114	EC:1.3.1.12	KEGG: 00400+1.3.1.12|KEGG: 00401+1.3.1.12|UniPathway: UPA00122
Dr01201	Ankyrin repeat|Ankyrin repeat-containing domain	GO:0016874|GO:0016301|GO:0016310|GO:0016567|GO:0008270|GO:0005739		ankyrin repeat-rich protein	IPR002110|IPR020683	GO:0005515
Dr01202	Probable transposase, Ptta/En/Spm, plant				IPR004252
Dr01203	Prephenate dehydrogenase|NAD(P)-binding domain	GO:0006571|GO:0008977|GO:0009507|GO:0004665|GO:0005739|GO:0000166|GO:0055114|GO:0000162|GO:0009094	EC:1.3.1.12|EC:1.3.1.13	arogenate dehydrogenase chloroplastic-like	IPR003099|IPR016040	GO:0004665|GO:0006571|GO:0008977|GO:0055114	EC:1.3.1.12	KEGG: 00400+1.3.1.12|KEGG: 00401+1.3.1.12|UniPathway: UPA00122
Dr01204	Peptidase C48, SUMO/Sentrin/Ubl1				IPR003653	GO:0006508|GO:0008234
Dr01205
Dr01206
Dr01207
Dr01208	Zinc finger, RING/FYVE/PHD-type|Nucleotide-binding, alpha-beta plait|RNA recognition motif domain, eukaryote|Zinc finger, RING-type|RNA recognition motif domain	GO:0005488		rna recognition motif-containing protein	IPR013083|IPR012677|IPR003954|IPR001841|IPR000504	GO:0000166|GO:0003676|GO:0005515|GO:0008270
Dr01209	Myb/SANT-like domain				IPR024752
Dr01210	Herpesvirus UL139, cytomegalovirus				IPR021042
Dr01211	Development/cell death domain				IPR013989
Dr01212	Starch synthase, catalytic domain	GO:0009536		soluble starch synthase i	IPR013534		EC:2.4.1.21	KEGG: 00500+2.4.1.21|MetaCyc: PWY-622|UniPathway: UPA00164
Dr01213
Dr01214	Glycosyl transferase, family 1|Starch synthase, catalytic domain|Glycogen/starch synthase, ADP-glucose type	GO:0009501|GO:0009011|GO:0019252|GO:0009570|GO:0010021|GO:0005985	EC:2.4.1.21	soluble starch synthase i	IPR001296|IPR013534|IPR011835	GO:0009058|GO:0009011|GO:0009250	EC:2.4.1.21	KEGG: 00500+2.4.1.21|MetaCyc: PWY-622|UniPathway: UPA00164
Dr01215	IQ motif, EF-hand binding site|Domain of unknown function DUF4005				IPR000048|IPR025064	GO:0005515
Dr01216	Peptidase S10, serine carboxypeptidase|Peptidase S10, serine carboxypeptidase, active site	GO:0004185|GO:0005618|GO:0006508	EC:3.4.16.0	serine carboxypeptidase-like protein	IPR001563|IPR018202	GO:0004185|GO:0006508
Dr01217	Cobalamin (vitamin B12) biosynthesis CbiX	GO:0046872|GO:0051266|GO:0019354|GO:0006979|GO:0009236|GO:0016852|GO:0009507	EC:4.99.1.4|EC:4.99.1.3	sirohydrochlorin ferrochelatase	IPR002762	GO:0009236|GO:0016829|GO:0046872	EC:4.99.1.3	KEGG: 00860+4.99.1.3|MetaCyc: PWY-5507|UniPathway: UPA00148
Dr01218
Dr01219
Dr01220	Transposase, MuDR, plant	GO:0005488|GO:0043231|GO:0044444		transposon mutator sub-class	IPR004332
Dr01221
Dr01222		GO:0010468|GO:0009987		protein
Dr01223		GO:0006355|GO:0003677|GO:0009535|GO:0003713|GO:0005667|GO:0045941		uncharacterized protein
Dr01224	DNA polymerase III, beta chain, N-terminal|Molybdopterin cofactor biosynthesis C (MoaC) domain|Molybdenum cofactor biosynthesis C|Molybdenum cofactor biosynthesis C, bacterial-type	GO:0006777|GO:0016020|GO:0003824|GO:0009536		molybdopterin biosynthesis protein cnx3	IPR022634|IPR002820|IPR023045|IPR023046	GO:0003677|GO:0003887|GO:0006260|GO:0008408|GO:0009360|GO:0006777	EC:2.7.7.7	KEGG: 00230+2.7.7.7|KEGG: 00240+2.7.7.7|UniPathway: UPA00344
Dr01225	Molybdopterin cofactor biosynthesis C (MoaC) domain|Iron-sulphur binding protein LdpA, C-terminal	GO:0006777|GO:0016020|GO:0003824|GO:0009536		molybdopterin biosynthesis protein cnx3	IPR002820|IPR021039	GO:0006777		UniPathway: UPA00344
Dr01226	Transferase|Chloramphenicol acetyltransferase-like domain				IPR003480|IPR023213	GO:0016747
Dr01227
Dr01228
Dr01229	Pentatricopeptide repeat|Tetratricopeptide-like helical				IPR002885|IPR011990	GO:0005515
Dr01230	Molybdopterin cofactor biosynthesis C (MoaC) domain	GO:0046872|GO:0006777|GO:0051539|GO:0016020|GO:0019008|GO:0003824|GO:0009536		molybdopterin biosynthesis protein cnx3	IPR002820	GO:0006777		UniPathway: UPA00344
Dr01231
Dr01232	Domain of unknown function DUF3883|Histidine kinase-like ATPase, ATP-binding domain				IPR024975|IPR003594	GO:0005524
Dr01233
Dr01234
Dr01235
Dr01236		GO:0046872|GO:0044267		uncharacterized protein
Dr01237	Zinc finger, PHD-finger|Zinc finger, FYVE/PHD-type|Zinc finger, RING/FYVE/PHD-type|Zinc finger, PHD-type|Zinc finger, RING-type	GO:0008270		uncharacterized protein at4g10930-like	IPR019787|IPR011011|IPR013083|IPR001965|IPR001841	GO:0005515|GO:0008270
Dr01238	Protein of unknown function DUF821, CAP10-like|Lipopolysaccharide-modifying protein				IPR008539|IPR006598
Dr01239	Co-chaperone Hsc20|DnaJ domain|Co-chaperone HscB, C-terminal oligomerisation domain	GO:0006457|GO:0051087|GO:0051259|GO:0005739		iron-sulfur cluster co-chaperone protein mitochondrial-like	IPR004640|IPR001623|IPR009073	GO:0006457|GO:0051087|GO:0051259
Dr01240
Dr01241	AP2/ERF domain|Replication factor A, C-terminal|Nucleic acid-binding, OB-fold|DNA-binding domain	GO:0003700|GO:0003677|GO:0006355|GO:0005667|GO:0045449		dna binding	IPR001471|IPR013955|IPR012340|IPR016177	GO:0003700|GO:0006355|GO:0003677
Dr01242
Dr01243
Dr01244
Dr01245	DnaJ domain	GO:0006457|GO:0051259|GO:0051087		iron-sulfur cluster co-chaperone protein mitochondrial-like	IPR001623
Dr01246
Dr01247	Pentatricopeptide repeat|Tetratricopeptide-like helical				IPR002885|IPR011990	GO:0005515
Dr01248	Peptidase S9, prolyl oligopeptidase, catalytic domain|Peptidase S9B, dipeptidylpeptidase IV N-terminal	GO:0008236|GO:0016020|GO:0006508		dipeptidyl peptidase	IPR001375|IPR002469	GO:0006508|GO:0008236|GO:0016020
Dr01249	Lipase, GDSL|SGNH hydrolase-type esterase domain	GO:0016787		gdsl-motif lipase hydrolase family protein	IPR001087|IPR013831	GO:0006629|GO:0016788|GO:0016787
Dr01250
Dr01251	Pectinesterase, catalytic|Pectinesterase inhibitor domain|Pectin lyase fold/virulence factor|Pectin lyase fold	GO:0042545|GO:0005618|GO:0030599|GO:0045330|GO:0004857|GO:0043086|GO:0005982|GO:0005985	EC:3.1.1.11	pectinesterase family protein	IPR000070|IPR006501|IPR011050|IPR012334	GO:0005618|GO:0030599|GO:0042545|GO:0004857	EC:3.1.1.11	KEGG: 00040+3.1.1.11|KEGG: 00500+3.1.1.11|MetaCyc: PWY-1081|MetaCyc: PWY-7243|MetaCyc: PWY-7246|MetaCyc: PWY-7248|UniPathway: UPA00545
Dr01252	Lipase, class 3	GO:0004806|GO:0016042|GO:0046486	EC:3.1.1.3	gdsl esterase lipase at4g10955-like	IPR002921	GO:0004806|GO:0006629		Reactome: REACT_14797|Reactome: REACT_604
Dr01253	Dynamin superfamily|Dynamin, GTPase domain|Dynamin central domain|Dynamin GTPase effector|P-loop containing nucleoside triphosphate hydrolase|GTPase effector domain, GED|Dynamin, GTPase region, conserved site	GO:0009793|GO:0005773|GO:0005525|GO:0009524|GO:0006184|GO:0005874|GO:0010051|GO:0030276|GO:0009504|GO:0003924|GO:0009535|GO:0005886|GO:0009920|GO:0048488|GO:0010091		dynamin-related protein 5a	IPR022812|IPR001401|IPR000375|IPR003130|IPR027417|IPR020850|IPR019762	GO:0003924|GO:0005525
Dr01254	UDP-glucose 4-epimerase GalE|NAD-dependent epimerase/dehydratase|UDP-glucose 4-epimerase C-terminal domain|Nucleotide sugar epimerase|NAD(P)-binding domain	GO:0005829|GO:0006012|GO:0010053|GO:0005795|GO:0046983|GO:0000166|GO:0003978|GO:0050662|GO:0042546|GO:0009969|GO:0006950|GO:0009225	EC:5.1.3.2	udp-glucose 4-epimerase	IPR005886|IPR001509|IPR025308|IPR016040|IPR008089	GO:0003978|GO:0006012|GO:0003824|GO:0044237|GO:0050662|GO:0005975|GO:0016857	EC:5.1.3.2	KEGG: 00052+5.1.3.2|KEGG: 00520+5.1.3.2|MetaCyc: PWY-3821|MetaCyc: PWY-6317|MetaCyc: PWY-6397|MetaCyc: PWY-6527|UniPathway: UPA00214
Dr01255	CCT domain				IPR010402	GO:0005515
Dr01256	Clustered mitochondria protein, N-terminal|GSKIP domain|Tetratricopeptide-like helical|Tetratricopeptide repeat|Tetratricopeptide repeat-containing domain				IPR028275|IPR023231|IPR011990|IPR019734|IPR013026	GO:0005515
Dr01257	Oxoglutarate/iron-dependent dioxygenase|Non-haem dioxygenase N-terminal domain|Isopenicillin N synthase-like	GO:0016706|GO:0044710	EC:1.14.11.0	probable 2-oxoglutarate fe -dependent dioxygenase-like	IPR005123|IPR026992|IPR027443	GO:0016491|GO:0016706|GO:0055114
Dr01258	YTH domain				IPR007275
Dr01259	DNA replication licensing factor Mcm6|Mini-chromosome maintenance, DNA-dependent ATPase|MCM N-terminal domain|Nucleic acid-binding, OB-fold|P-loop containing nucleoside triphosphate hydrolase|Mini-chromosome maintenance, conserved site	GO:0006270|GO:0003677|GO:0032508|GO:0003678|GO:0005524|GO:0042555|GO:0005634|GO:0005657		minichromosome maintenance protein	IPR008049|IPR001208|IPR027925|IPR012340|IPR027417|IPR018525	GO:0003677|GO:0003678|GO:0005524|GO:0005634|GO:0006270|GO:0042555|GO:0006260		Reactome: REACT_152|Reactome: REACT_1538|Reactome: REACT_383
Dr01260	Ribosomal protein L37ae|Zinc-binding ribosomal protein|Ribosomal protein L37ae/L37e	GO:0046872|GO:0003735|GO:0022625|GO:0006412|GO:0005739|GO:0042254		60s ribosomal protein l37a	IPR002674|IPR011332|IPR011331	GO:0003735|GO:0005622|GO:0005840|GO:0006412
Dr01261	Adenosylhomocysteinase	GO:0005488|GO:0016458|GO:0040029|GO:0044464|GO:0016787|GO:0044237|GO:0016020		s-adenosyl-l-homocysteine hydrolase	IPR000043	GO:0004013|GO:0006730	EC:3.3.1.1	KEGG: 00270+3.3.1.1|MetaCyc: PWY-5041|UniPathway: UPA00314
Dr01262	Adenosylhomocysteinase	GO:0005488|GO:0016458|GO:0040029|GO:0044464|GO:0016787|GO:0044237|GO:0016020		s-adenosyl-l-homocysteine hydrolase	IPR000043	GO:0004013|GO:0006730	EC:3.3.1.1	KEGG: 00270+3.3.1.1|MetaCyc: PWY-5041|UniPathway: UPA00314
Dr01263	Pectate lyase/Amb allergen|Pectin lyase fold/virulence factor|Pectin lyase fold	GO:0005488|GO:0016829|GO:0016458|GO:0040029|GO:0044464|GO:0016787|GO:0044237|GO:0016020		s-adenosyl-l-homocysteine hydrolase	IPR002022|IPR011050|IPR012334
Dr01264	Leucine-rich repeat|Leucine-rich repeat, typical subtype				IPR001611|IPR003591	GO:0005515
Dr01265	Leucine-rich repeat|Leucine rich repeat 4				IPR001611|IPR025875	GO:0005515
Dr01266	Ubiquitin-conjugating enzyme, E2|Ubiquitin-conjugating enzyme/RWD-like	GO:0009536		probable ubiquitin-conjugating enzyme e2 25-like	IPR000608|IPR016135	GO:0016881
Dr01267	Protein of unknown function DUF2921				IPR021319
Dr01268
Dr01269		GO:0016021|GO:0030244|GO:0000139|GO:0016760|GO:0044707|GO:0005982|GO:0005985|GO:0006011	EC:2.4.1.12	cellulose synthase-like protein d3-like
Dr01270	Uncharacterised protein family UPF0497, trans-membrane plant|Uncharacterised protein family UPF0497, trans-membrane plant subgroup				IPR006702|IPR006459
Dr01271	Epsin domain, N-terminal|ENTH/VHS|VHS subgroup|VHS				IPR001026|IPR008942|IPR018205|IPR002014	GO:0006886
Dr01272	tRNase Z endonuclease|Beta-lactamase-like|Ribonuclease Z	GO:0016891|GO:0042780|GO:0051252	EC:3.1.26.0	zinc phosphodiesterase elac protein 2-like	IPR027794|IPR001279|IPR013471	GO:0008033|GO:0016787|GO:0016891|GO:0042779
Dr01273
Dr01274	Carotenoid oxygenase	GO:0043167|GO:0004672|GO:1901363|GO:0008152|GO:0097159		carotenoid (9 )-cleavage dioxygenase 1-like	IPR004294
Dr01275	Major intrinsic protein|Aquaporin-like|Major intrinsic protein, conserved site	GO:0015204|GO:0016021|GO:0009941|GO:0051739|GO:0071918|GO:0009705|GO:0009505|GO:0072489|GO:0015200|GO:0006833|GO:0000326|GO:0042807|GO:0005886		mip tip subfamily	IPR000425|IPR023271|IPR022357	GO:0005215|GO:0006810|GO:0016020
Dr01276	Glyoxalase/fosfomycin resistance/dioxygenase domain|Glyoxalase I|Glyoxalase I, conserved site	GO:0046872|GO:0009409|GO:0031977|GO:0010319|GO:0009570|GO:0004462|GO:0005975|GO:0006090	EC:4.4.1.5	probable lactoylglutathione chloroplast-like	IPR004360|IPR004361|IPR018146	GO:0004462|GO:0046872	EC:4.4.1.5	KEGG: 00620+4.4.1.5|MetaCyc: PWY-5386|UniPathway: UPA00619
Dr01277	Domain of unknown function DUF828|Pleckstrin-like, plant|Pleckstrin homology-like domain|Pleckstrin homology domain				IPR008546|IPR013666|IPR011993|IPR001849	GO:0005515|GO:0005543
Dr01278	Retrotransposon gag domain				IPR005162
Dr01279	Heavy metal-associated domain, HMA				IPR006121	GO:0030001|GO:0046872
Dr01280	Geminivirus AL3 coat protein	GO:0019028|GO:0016779|GO:0090305|GO:0046872|GO:0006260|GO:0003677|GO:0005524|GO:0016888|GO:0004386|GO:0019048|GO:0005198|GO:0042025|GO:0006308	EC:2.7.7.0|EC:3.1.21.0	replication protein	IPR000657	GO:0016032
Dr01281
Dr01282	Zinc finger, CCHC-type				IPR001878	GO:0003676|GO:0008270
Dr01283		GO:0003682|GO:0000785		transcription regulation protein
Dr01284	GPI mannosyltransferase	GO:0006506|GO:0031227|GO:0016757		dol-p-man:man c -pp-dol alpha- -mannosyltransferase-like	IPR005599	GO:0016757
Dr01285
Dr01286	Bacterial transferase hexapeptide repeat|Nucleotidyl transferase	GO:0009753|GO:0004475|GO:0010193|GO:0005739|GO:0009651|GO:0030244|GO:0042742|GO:0009408|GO:0008928|GO:0019853|GO:0009298|GO:0060359|GO:0005525|GO:0006000|GO:0006013	EC:2.7.7.13|EC:2.7.7.22	gdp-mannose pyrophosphorylase	IPR001451|IPR005835	GO:0009058|GO:0016779		Reactome: REACT_17015
Dr01287	Serine-threonine/tyrosine-protein kinase catalytic domain|Protein kinase-like domain|Tyrosine-protein kinase, catalytic domain|Protein kinase domain|Protein kinase, ATP binding site	GO:0006468|GO:0005524|GO:0004674|GO:0009069	EC:2.7.11.0	mitogen activated protein kinase kinase kinase-like protein	IPR001245|IPR011009|IPR020635|IPR000719|IPR017441	GO:0004672|GO:0006468|GO:0016772|GO:0004713|GO:0005524
Dr01288		GO:0019538|GO:0016310|GO:0004672		protein
Dr01289	Cysteamine dioxygenase|RmlC-like cupin domain|RmlC-like jelly roll fold	GO:0047800|GO:0006952|GO:0043531|GO:0005739|GO:0055114|GO:0019530	EC:1.13.11.19	2-aminoethanethiol dioxygenase-like	IPR012864|IPR011051|IPR014710	GO:0047800|GO:0055114	EC:1.13.11.19	KEGG: 00430+1.13.11.19
Dr01290
Dr01291
Dr01292
Dr01293	Cro/C1-type helix-turn-helix domain|Multiprotein bridging factor 1, N-terminal|Lambda repressor-like, DNA-binding domain	GO:0043565|GO:0005730|GO:0005737		transcriptional coactivator-like protein	IPR001387|IPR013729|IPR010982	GO:0043565|GO:0003677
Dr01294	F-box domain|Tubby, C-terminal|Tubby C-terminal-like domain|Tubby, C-terminal, conserved site				IPR001810|IPR000007|IPR025659|IPR018066	GO:0005515
Dr01295	Calcium/calmodulin-dependent/calcium-dependent protein kinase|Protein kinase domain|NAF domain|Protein kinase-like domain|Serine/threonine- / dual specificity protein kinase, catalytic domain|NAF/FISL domain|Protein kinase, ATP binding site|Serine/threonine-protein kinase, active site	GO:0009788|GO:0006468|GO:0004674|GO:0005524|GO:0009069	EC:2.7.11.0	serine-threonine kinase	IPR020636|IPR000719|IPR004041|IPR011009|IPR002290|IPR018451|IPR017441|IPR008271	GO:0004672|GO:0005524|GO:0006468|GO:0007165|GO:0016772|GO:0004674
Dr01296	SNF2-related|Helicase, C-terminal|HIP116, Rad5p N-terminal|P-loop containing nucleoside triphosphate hydrolase|Zinc finger, RING/FYVE/PHD-type|Zinc finger, RING-type|Helicase, superfamily 1/2, ATP-binding domain|Zinc finger, RING-type, conserved site	GO:0043167|GO:0097159|GO:1901363		chromatin remodeling complex subunit	IPR000330|IPR001650|IPR014905|IPR027417|IPR013083|IPR001841|IPR014001|IPR017907	GO:0003677|GO:0005524|GO:0003676|GO:0004386|GO:0008270|GO:0016818|GO:0005515
Dr01297	Alcohol dehydrogenase superfamily, zinc-type|Alcohol dehydrogenase, C-terminal|Alcohol dehydrogenase GroES-like|GroES (chaperonin 10)-like|NAD(P)-binding domain|Zinc finger, CCHC-type|Alcohol dehydrogenase, zinc-type, conserved site	GO:0051903|GO:0046686|GO:0005886|GO:0003979|GO:0004022|GO:0001666|GO:0005829|GO:0008270|GO:0009651|GO:0000166|GO:0055114|GO:0005982|GO:0005985|GO:0009117	EC:1.1.1.284|EC:1.1.1.22|EC:1.1.1.1	alcohol dehydrogenase 1	IPR002085|IPR013149|IPR013154|IPR011032|IPR016040|IPR001878|IPR002328	GO:0008270|GO:0016491|GO:0055114|GO:0003676
Dr01298
Dr01299	Alcohol dehydrogenase superfamily, zinc-type|Alcohol dehydrogenase, C-terminal|Alcohol dehydrogenase GroES-like|GroES (chaperonin 10)-like|NAD(P)-binding domain|Alcohol dehydrogenase, zinc-type, conserved site	GO:0051903|GO:0046686|GO:0005886|GO:0003979|GO:0004022|GO:0001666|GO:0005829|GO:0008270|GO:0009651|GO:0000166|GO:0055114|GO:0005982|GO:0005985|GO:0009117	EC:1.1.1.284|EC:1.1.1.22|EC:1.1.1.1	alcohol dehydrogenase 1	IPR002085|IPR013149|IPR013154|IPR011032|IPR016040|IPR002328	GO:0008270|GO:0016491|GO:0055114
Dr01300	Alcohol dehydrogenase superfamily, zinc-type|Alcohol dehydrogenase GroES-like|GroES (chaperonin 10)-like	GO:0005488|GO:0016616	EC:1.1.1.0	alcohol dehydrogenase family-2	IPR002085|IPR013154|IPR011032	GO:0008270|GO:0016491|GO:0055114
Dr01301	Alcohol dehydrogenase superfamily, zinc-type|NAD(P)-binding domain	GO:0046686|GO:0005886|GO:0004022|GO:0001666|GO:0005829|GO:0008270|GO:0009651|GO:0000166|GO:0055114	EC:1.1.1.1	alcohol dehydrogenase	IPR002085|IPR016040	GO:0008270|GO:0016491|GO:0055114
Dr01302	Calcium/calmodulin-dependent/calcium-dependent protein kinase|Protein kinase domain|NAF domain|Protein kinase-like domain|Serine/threonine- / dual specificity protein kinase, catalytic domain|NAF/FISL domain|Protein kinase, ATP binding site|Serine/threonine-protein kinase, active site	GO:0004683|GO:0006468|GO:0005524|GO:0007165|GO:0009069	EC:2.7.11.17	protein kinase	IPR020636|IPR000719|IPR004041|IPR011009|IPR002290|IPR018451|IPR017441|IPR008271	GO:0004672|GO:0005524|GO:0006468|GO:0007165|GO:0016772|GO:0004674
Dr01303	Probable transposase, Ptta/En/Spm, plant				IPR004252
Dr01304
Dr01305	Serine-threonine/tyrosine-protein kinase catalytic domain|Protein kinase-like domain|Concanavalin A-like lectin/glucanase, subgroup|Tyrosine-protein kinase, catalytic domain|Leucine-rich repeat, typical subtype|Protein kinase domain|Leucine-rich repeat	GO:0016023|GO:0000166|GO:0016310|GO:0016301		probable lrr receptor-like serine threonine-protein kinase at2g24230-like	IPR001245|IPR011009|IPR013320|IPR020635|IPR003591|IPR000719|IPR001611	GO:0004672|GO:0006468|GO:0016772|GO:0004713|GO:0005524|GO:0005515
Dr01306	Protein kinase domain|Protein kinase-like domain|Serine/threonine- / dual specificity protein kinase, catalytic domain|Protein kinase, ATP binding site|Serine/threonine-protein kinase, active site	GO:0009825|GO:0009729|GO:0046827|GO:0005829|GO:0042538|GO:0009965|GO:0006468|GO:0004674|GO:0009742|GO:0005886|GO:0005524|GO:0050321|GO:0009733|GO:0009069	EC:2.7.11.0|EC:2.7.11.26	shaggy-related protein kinase iota	IPR000719|IPR011009|IPR002290|IPR017441|IPR008271	GO:0004672|GO:0005524|GO:0006468|GO:0016772|GO:0004674
Dr01307	Protein kinase domain|Leucine-rich repeat-containing N-terminal, type 2|Protein kinase-like domain|Concanavalin A-like lectin/glucanase, subgroup|Serine/threonine- / dual specificity protein kinase, catalytic domain|Protein kinase, ATP binding site|Serine/threonine-protein kinase, active site	GO:0016023|GO:0016310|GO:0004672|GO:0016020|GO:0000166		leucine-rich repeat transmembrane protein	IPR000719|IPR013210|IPR011009|IPR013320|IPR002290|IPR017441|IPR008271	GO:0004672|GO:0005524|GO:0006468|GO:0016772|GO:0004674
Dr01308	Aspartate/other aminotransferase|Aminotransferase, class I/classII|Pyridoxal phosphate-dependent transferase|Pyridoxal phosphate-dependent transferase, major region, subdomain 1|Aminotransferases, class-I, pyridoxal-phosphate-binding site	GO:0030170|GO:0005507|GO:0046686|GO:0004069|GO:0080130|GO:0005739|GO:0000162|GO:0006107|GO:0006522|GO:0006525|GO:0006531|GO:0006534|GO:0006536|GO:0006560|GO:0006571|GO:0009094|GO:0009821|GO:0015976	EC:2.6.1.1	aspartate aminotransferase	IPR000796|IPR004839|IPR015424|IPR015421|IPR004838	GO:0006520|GO:0008483|GO:0009058|GO:0030170|GO:0003824	EC:2.6.1.1	KEGG: 00250+2.6.1.1|KEGG: 00270+2.6.1.1|KEGG: 00330+2.6.1.1|KEGG: 00350+2.6.1.1|KEGG: 00360+2.6.1.1|KEGG: 00400+2.6.1.1|KEGG: 00401+2.6.1.1|KEGG: 00710+2.6.1.1|KEGG: 00950+2.6.1.1|KEGG: 00960+2.6.1.1|MetaCyc: PWY-5913|MetaCyc: PWY-6318|MetaCyc: PWY-6638|MetaCyc: PWY-6642|MetaCyc: PWY-6643|MetaCyc: PWY-7115|MetaCyc: PWY-7117|Reactome: REACT_13
Dr01309	FAD linked oxidase, N-terminal|Berberine/berberine-like|FAD-binding, type 2|CO dehydrogenase flavoprotein-like, FAD-binding, subdomain 2	GO:0050896|GO:0016491		reticuline oxidase-like	IPR006094|IPR012951|IPR016166|IPR016169	GO:0008762|GO:0016491|GO:0050660|GO:0055114|GO:0003824|GO:0016614	EC:1.3.1.98	KEGG: 00520+1.3.1.98|KEGG: 00550+1.3.1.98|MetaCyc: PWY-6386|MetaCyc: PWY-6387|UniPathway: UPA00219
Dr01310	Peptidase C48, SUMO/Sentrin/Ubl1				IPR003653	GO:0006508|GO:0008234
Dr01311	Zinc finger, RING-CH-type|Zinc finger, RING/FYVE/PHD-type				IPR011016|IPR013083	GO:0008270	EC:6.3.2.-	KEGG: 00300+6.3.2.-|KEGG: 00380+6.3.2.-|UniPathway: UPA00143
Dr01312	Crotonase superfamily				IPR001753	GO:0003824|GO:0008152
Dr01313	Rho termination factor, N-terminal|Nucleic acid-binding, OB-fold				IPR011112|IPR012340	GO:0006353
Dr01314
Dr01315	Crotonase superfamily	GO:0009987|GO:0008152|GO:0003824|GO:0044424		carnitinyl- dehydratase-like	IPR001753	GO:0003824|GO:0008152
Dr01316	Crotonase superfamily	GO:0009987|GO:0008152|GO:0003824|GO:0044424		carnitinyl- dehydratase-like	IPR001753	GO:0003824|GO:0008152
Dr01317	Crotonase superfamily	GO:0009987|GO:0008152|GO:0003824|GO:0044424		carnitinyl- dehydratase-like	IPR001753	GO:0003824|GO:0008152
Dr01318	Cellulose synthase|Cellulose synthase, RING-type zinc finger|Zinc finger, RING/FYVE/PHD-type	GO:0016760|GO:0016761|GO:0030244|GO:0016021|GO:0005982|GO:0005985|GO:0006011	EC:2.4.1.12|EC:2.4.1.29	cellulose synthase	IPR005150|IPR027934|IPR013083	GO:0016020|GO:0016760|GO:0030244	EC:2.4.1.12	KEGG: 00500+2.4.1.12|MetaCyc: PWY-1001|UniPathway: UPA00695
Dr01319	Pentatricopeptide repeat|Tetratricopeptide-like helical	GO:0016023		pentatricopeptide repeat-containing protein	IPR002885|IPR011990	GO:0005515
Dr01320	Protein of unknown function DUF1685				IPR012881
Dr01321	DNA-binding WRKY	GO:0003677		wrky transcription factor	IPR003657	GO:0003700|GO:0006355|GO:0043565
Dr01322	Small GTPase superfamily|P-loop containing nucleoside triphosphate hydrolase|Small GTPase superfamily, Ras type|Small GTPase superfamily, Rho type|Small GTPase superfamily, Rab type|Ran GTPase|Small GTP-binding protein domain	GO:0005773|GO:0005525|GO:0003677|GO:0005886|GO:0016787|GO:0005634|GO:0007264|GO:0015031		gtp-binding protein	IPR001806|IPR027417|IPR020849|IPR003578|IPR003579|IPR002041|IPR005225	GO:0005525|GO:0007264|GO:0003924|GO:0006184|GO:0007165|GO:0016020|GO:0005622|GO:0015031|GO:0006886|GO:0006913		Reactome: REACT_11044
Dr01323
Dr01324		GO:0009536		protein
Dr01325
Dr01326
Dr01327
Dr01328	Pentatricopeptide repeat				IPR002885
Dr01329	Bulb-type lectin domain|Apple-like	GO:0009987|GO:0016772		serine-threonine protein plant-	IPR001480|IPR003609
Dr01330	Protein kinase domain|Serine-threonine/tyrosine-protein kinase catalytic domain|Protein kinase-like domain|Concanavalin A-like lectin/glucanase, subgroup|Serine/threonine- / dual specificity protein kinase, catalytic domain|Protein kinase, ATP binding site|Serine/threonine-protein kinase, active site	GO:0009987|GO:0016772		g-type lectin s-receptor-like serine threonine-protein kinase sd2-5-like	IPR000719|IPR001245|IPR011009|IPR013320|IPR002290|IPR017441|IPR008271	GO:0004672|GO:0005524|GO:0006468|GO:0016772|GO:0004674
Dr01331	Protein kinase domain|Bulb-type lectin domain|PAN-2 domain|Protein kinase-like domain|Concanavalin A-like lectin/glucanase, subgroup|Serine/threonine- / dual specificity protein kinase, catalytic domain|Protein kinase, ATP binding site|Serine/threonine-protein kinase, active site	GO:0009987|GO:0016772		g-type lectin s-receptor-like serine threonine-protein kinase sd2-5-like	IPR000719|IPR001480|IPR013227|IPR011009|IPR013320|IPR002290|IPR017441|IPR008271	GO:0004672|GO:0005524|GO:0006468|GO:0016772|GO:0004674
Dr01332	Bulb-type lectin domain|Concanavalin A-like lectin/glucanase, subgroup	GO:0016740		serine-threonine protein plant-	IPR001480|IPR013320
Dr01333	Protein kinase domain|Bulb-type lectin domain|Protein kinase-like domain|Concanavalin A-like lectin/glucanase, subgroup|Serine/threonine- / dual specificity protein kinase, catalytic domain|Serine/threonine-protein kinase, active site	GO:0009987|GO:0016772		serine-threonine protein plant-	IPR000719|IPR001480|IPR011009|IPR013320|IPR002290|IPR008271	GO:0004672|GO:0005524|GO:0006468|GO:0016772|GO:0004674
Dr01334	Protein kinase domain|Bulb-type lectin domain|Protein kinase-like domain|Concanavalin A-like lectin/glucanase, subgroup|Apple-like|Protein kinase, ATP binding site	GO:0009987|GO:0016301		serine-threonine protein plant-	IPR000719|IPR001480|IPR011009|IPR013320|IPR003609|IPR017441	GO:0004672|GO:0005524|GO:0006468|GO:0016772
Dr01335		GO:0004672|GO:0016023|GO:0000166|GO:0016310		receptor serine threonine kinase pr5k
Dr01336	Protein kinase domain|Bulb-type lectin domain|Protein kinase-like domain|Concanavalin A-like lectin/glucanase, subgroup|Serine/threonine- / dual specificity protein kinase, catalytic domain|Apple-like|Protein kinase, ATP binding site|Serine/threonine-protein kinase, active site	GO:0004672|GO:0016023|GO:0016310|GO:0007154|GO:0016020		serine-threonine protein plant-	IPR000719|IPR001480|IPR011009|IPR013320|IPR002290|IPR003609|IPR017441|IPR008271	GO:0004672|GO:0005524|GO:0006468|GO:0016772|GO:0004674
Dr01337	Protein kinase domain|Bulb-type lectin domain|PAN-2 domain|Protein kinase-like domain|Concanavalin A-like lectin/glucanase, subgroup|Serine/threonine- / dual specificity protein kinase, catalytic domain|Apple-like|Protein kinase, ATP binding site|Serine/threonine-protein kinase, active site	GO:0004672|GO:0016023|GO:0016310|GO:0007154|GO:0016020		serine-threonine protein plant-	IPR000719|IPR001480|IPR013227|IPR011009|IPR013320|IPR002290|IPR003609|IPR017441|IPR008271	GO:0004672|GO:0005524|GO:0006468|GO:0016772|GO:0004674
Dr01338	U box domain|Armadillo repeat-containing domain|Armadillo-type fold|Armadillo-like helical|Zinc finger, RING/FYVE/PHD-type|Armadillo	GO:0016567|GO:0004842	EC:6.3.2.19	u-box domain-containing protein 17	IPR003613|IPR006911|IPR016024|IPR011989|IPR013083|IPR000225	GO:0000151|GO:0004842|GO:0016567|GO:0005488|GO:0005515
Dr01339
Dr01340	NHL repeat|Six-bladed beta-propeller, TolB-like				IPR001258|IPR011042	GO:0005515
Dr01341	Domain of unknown function DUF641, plant				IPR006943
Dr01342	RNA recognition motif domain|Domain of unknown function DUF4283|Zinc knuckle CX2CX4HX4C|Nucleotide-binding, alpha-beta plait|Zinc finger, CCHC-type	GO:0046872|GO:0000398|GO:1901363|GO:0097159		splicing arginine serine-rich 7	IPR000504|IPR025558|IPR025836|IPR012677|IPR001878	GO:0003676|GO:0000166|GO:0008270
Dr01343
Dr01344		GO:0004672|GO:0006468|GO:0005524		receptor protein
Dr01345
Dr01346	FYVE zinc finger|NLI interacting factor|Ysc84 actin-binding domain|HAD-like domain|Zinc finger, FYVE/PHD-type|Zinc finger, RING/FYVE/PHD-type|Dullard phosphatase domain, eukaryotic|Zinc finger, FYVE-related	GO:0046872		ring fyve phd zinc finger-containing protein	IPR000306|IPR004274|IPR007461|IPR023214|IPR011011|IPR013083|IPR011948|IPR017455	GO:0046872|GO:0005515|GO:0016791
Dr01347	Transcription elongation factor 1	GO:0003746|GO:0006351|GO:0005840|GO:0006448		transcription elongation factor 1	IPR007808
Dr01348	Ubiquinone biosynthesis O-methyltransferase	GO:0008425|GO:0006744|GO:0032259|GO:0005739		dihydroxypolyprenylbenzoate methyltransferase	IPR010233	GO:0006744|GO:0008425	EC:2.1.1.222+2.1.1.64	KEGG: 00130+2.1.1.222+2.1.1.64|MetaCyc: PWY-5855|MetaCyc: PWY-5856|MetaCyc: PWY-5857|MetaCyc: PWY-5870|MetaCyc: PWY-5871|MetaCyc: PWY-5872|MetaCyc: PWY-5873|MetaCyc: PWY-6708|MetaCyc: PWY-7230|MetaCyc: PWY-7233|UniPathway: UPA00232
Dr01349	Proton-dependent oligopeptide transporter family|Major facilitator superfamily domain, general substrate transporter	GO:0016020		probable peptide nitrate transporter at1g59740-like	IPR000109|IPR016196	GO:0005215|GO:0006810|GO:0016020		Reactome: REACT_15518|Reactome: REACT_19419
Dr01350	Probable transposase, Ptta/En/Spm, plant	GO:0006468|GO:0005524|GO:0004674|GO:0009069	EC:2.7.11.0	casein kinase	IPR004252
Dr01351	Phosphatidylethanolamine-binding protein PEBP|Phosphatidylethanolamine-binding, conserved site	GO:0005737|GO:0048573|GO:0009911|GO:0005634		flowering locus t	IPR008914|IPR001858
Dr01352	Serine/threonine protein phosphatase 5|Phosphoesterase domain|PPP domain|Serine/threonine-specific protein phosphatase/bis(5-nucleosyl)-tetraphosphatase	GO:0006470|GO:0030176|GO:0031965|GO:0046872|GO:0016607|GO:0004721|GO:0010017	EC:3.1.3.16	serine threonine-protein phosphatase 5	IPR011236|IPR004843|IPR013235|IPR006186	GO:0004721|GO:0005634|GO:0005737|GO:0006470|GO:0016787
Dr01353	Tetratricopeptide TPR1|Tetratricopeptide-like helical|Tetratricopeptide repeat|Tetratricopeptide repeat-containing domain	GO:0006470|GO:0030176|GO:0031965|GO:0046872|GO:0016607|GO:0004721|GO:0010017	EC:3.1.3.16	serine threonine-protein phosphatase 5	IPR001440|IPR011990|IPR019734|IPR013026	GO:0005515
Dr01354
Dr01355	Cytokinin riboside 5'-monophosphate phosphoribohydrolase LOG	GO:0043231|GO:0044444		protein	IPR005269
Dr01356	Zinc finger, RING-type|Zinc finger, RING/FYVE/PHD-type	GO:0008270		protein	IPR001841|IPR013083	GO:0005515|GO:0008270
Dr01357
Dr01358	Inorganic polyphosphate/ATP-NAD kinase, predicted|ATP-NAD kinase-like domain|ATP-NAD kinase, PpnK-type, all-beta|Inorganic polyphosphate/ATP-NAD kinase, domain 1	GO:0005829|GO:0032550|GO:0042736|GO:0043168|GO:0006741|GO:0003951|GO:0019674|GO:0016310|GO:0032559|GO:0006769|GO:0046497	EC:2.7.1.86|EC:2.7.1.23	nadh kinase	IPR002504|IPR016064|IPR017437|IPR017438	GO:0003951|GO:0006741|GO:0008152|GO:0019674	EC:2.7.1.23	KEGG: 00760+2.7.1.23|MetaCyc: PWY-5083|MetaCyc: PWY-7268|MetaCyc: PWY-7269
Dr01359	Aminotransferase-like, plant mobile domain				IPR019557
Dr01360	Cytokinin riboside 5'-monophosphate phosphoribohydrolase LOG				IPR005269
Dr01361	Uncharacterised domain KxDL				IPR019371
Dr01362	Plastocyanin-like|Cupredoxin				IPR003245|IPR008972	GO:0005507|GO:0009055
Dr01363	Heat shock protein DnaJ, cysteine-rich domain				IPR001305	GO:0031072|GO:0051082
Dr01364	Stigma-specific protein Stig1				IPR006969
Dr01365	Myc-type, basic helix-loop-helix (bHLH) domain				IPR011598	GO:0046983
Dr01366	Myc-type, basic helix-loop-helix (bHLH) domain				IPR011598	GO:0046983
Dr01367
Dr01368	RNA polymerase II, Rpb4|EF-hand domain pair|HRDC-like|Cation efflux protein cytoplasmic domain|EF-hand domain|EF-Hand 1, calcium-binding site	GO:0055085|GO:0016021|GO:0005774|GO:0008324|GO:0016740|GO:0006812|GO:0005886		metal tolerance protein	IPR005574|IPR011992|IPR010997|IPR027470|IPR002048|IPR018247	GO:0003899|GO:0006351|GO:0005509|GO:0000166|GO:0003824|GO:0044237
Dr01369	Oxidoreductase FAD/NAD(P)-binding|Flavodoxin/nitric oxide synthase|FAD-binding, type 1|Flavodoxin|Flavoprotein pyridine nucleotide cytochrome reductase|Riboflavin synthase-like beta-barrel|NADPH-cytochrome p450 reductase, FAD-binding, alpha-helical domain-3|Ferredoxin reductase-type FAD-binding domain	GO:0016491|GO:0043167		nadph-dependent diflavin oxidoreductase 1-like isoform 1	IPR001433|IPR008254|IPR003097|IPR017938|IPR023173|IPR001094|IPR001709|IPR017927	GO:0016491|GO:0055114|GO:0010181|GO:0005506
Dr01370	Amino acid transporter, transmembrane	GO:0016021		amino acid permease 1	IPR013057
Dr01371	Translation elongation factor EFG/EF2, domain IV|Elongation factor G, III-V domain|Ribosomal protein S5 domain 2-type fold|Ribosomal protein S5 domain 2-type fold, subgroup	GO:0071704|GO:1901363|GO:0044237|GO:0005737|GO:0044238|GO:0097159		protein	IPR005517|IPR009022|IPR020568|IPR014721	GO:0005525
Dr01372	Elongation factor, GTP-binding domain|Translation elongation factor EFTu/EF1A, domain 2|Translation protein, beta-barrel domain|P-loop containing nucleoside triphosphate hydrolase	GO:1901363|GO:0044424|GO:0097159		elongation factor ef-2	IPR000795|IPR004161|IPR009000|IPR027417	GO:0003924|GO:0005525
Dr01373	RNA-binding protein Lupus La|RNA-binding motif|Lupus La protein|Winged helix-turn-helix DNA-binding domain|Nucleotide-binding, alpha-beta plait|RNA recognition motif domain	GO:1901363|GO:0097159|GO:0044424		rna recognition motif -containing protein	IPR006630|IPR014886|IPR011991|IPR012677|IPR002344|IPR000504	GO:0000166|GO:0003723|GO:0005634|GO:0006396|GO:0030529|GO:0003676
Dr01374	AUX/IAA protein|Aux/IAA-ARF-dimerisation	GO:0006417|GO:0009733|GO:0046983|GO:0006351|GO:0005634		phytochrome-associated protein 1	IPR003311|IPR011525	GO:0005634|GO:0006355|GO:0046983
Dr01375	Taurine catabolism dioxygenase TauD/TfdA	GO:0016491|GO:0005634|GO:0055114		clavaminate synthase-like protein	IPR003819	GO:0016491|GO:0055114		Reactome: REACT_13
Dr01376
Dr01377	Initiator tRNA phosphoribosyl transferase	GO:0009536|GO:0016740		trna a64-2 -o-ribosylphosphate transferase	IPR007306	GO:0016763
Dr01378	Ribosomal protein S24e|Ribosomal protein L23/L15e core domain|Nucleotide-binding, alpha-beta plait|Ribosomal S24e conserved site	GO:0005730|GO:0003735|GO:0005886|GO:0005618|GO:0022627|GO:0009507|GO:0006412|GO:0000166|GO:0042254		40s ribosomal protein s24	IPR001976|IPR012678|IPR012677|IPR018098	GO:0003735|GO:0005622|GO:0005840|GO:0006412|GO:0000166
Dr01379	Malic enzyme, N-terminal|Malic enzyme, NAD-binding|Malic oxidoreductase|NAD(P)-binding domain|Malic enzyme, conserved site	GO:0005829|GO:0051287|GO:0005618|GO:0008270|GO:0050897|GO:0006108|GO:0004473|GO:0051289|GO:0042803|GO:0009507|GO:0046686|GO:0016619|GO:0005886|GO:0048046|GO:0006090|GO:0006099|GO:0015976	EC:1.1.1.40|EC:1.1.1.38	nadp-dependent malic enzyme	IPR012301|IPR012302|IPR016040|IPR001891|IPR015884	GO:0016616|GO:0016619|GO:0055114|GO:0051287|GO:0004470|GO:0006108|GO:0016491|GO:0046872
Dr01380	B3 DNA binding domain|DNA-binding pseudobarrel domain				IPR003340|IPR015300	GO:0003677
Dr01381	B3 DNA binding domain|DNA-binding pseudobarrel domain	GO:0005739		dna binding	IPR003340|IPR015300	GO:0003677
Dr01382	SANT/Myb domain|Homeodomain-like|Myb domain, plants|Zinc finger, CCHC-type|Myb domain	GO:0005488|GO:0010033		myb transcription factor myb52	IPR001005|IPR009057|IPR006447|IPR001878|IPR017930	GO:0003682|GO:0003677|GO:0003676|GO:0008270
Dr01383	Signal transduction histidine kinase, phosphotransfer (Hpt) domain	GO:0009927|GO:0000160|GO:0080036|GO:0016023|GO:0005634|GO:0005739		histidine-containing phosphotransfer protein 4-like	IPR008207	GO:0000160|GO:0004871
Dr01384	ABC transporter-like|ABC-2 type transporter|Plant PDR ABC transporter associated|P-loop containing nucleoside triphosphate hydrolase|AAA+ ATPase domain	GO:0071366|GO:0031348|GO:0009941|GO:0070574|GO:0042344|GO:0015086|GO:0052544|GO:0016021|GO:0042742|GO:0009817|GO:0015416|GO:0009737|GO:0006200|GO:0005886|GO:0005524|GO:0005739|GO:0009627|GO:0015716|GO:0015748	EC:3.6.3.28	atp-binding cassette	IPR003439|IPR013525|IPR013581|IPR027417|IPR003593	GO:0005524|GO:0016887|GO:0016020|GO:0000166|GO:0017111
Dr01385	P-loop containing nucleoside triphosphate hydrolase	GO:0071366|GO:0031348|GO:0009941|GO:0070574|GO:0042344|GO:0015086|GO:0052544|GO:0016021|GO:0042742|GO:0009817|GO:0015416|GO:0009737|GO:0006200|GO:0005886|GO:0005524|GO:0005739|GO:0009627|GO:0015716|GO:0015748	EC:3.6.3.28	abc transporter family pleiotropic drug resistance protein	IPR027417
Dr01386	Kinesin-like protein|Kinesin, motor domain|Calponin homology domain|P-loop containing nucleoside triphosphate hydrolase|Kinesin, motor region, conserved site	GO:0044464		kinesin calponin homology and calcium binding and coiled-coil domain-containing protein	IPR027640|IPR001752|IPR001715|IPR027417|IPR019821	GO:0003777|GO:0005871|GO:0007018|GO:0005524|GO:0008017|GO:0005515
Dr01387
Dr01388	Protein of unknown function DUF1677, plant				IPR012876
Dr01389	Homeobox domain|START domain|MEKHLA|Homeodomain-like|START-like domain	GO:0045597|GO:0006355|GO:0010075|GO:0009965|GO:0008284|GO:0080060|GO:0043565|GO:0048263|GO:0003700|GO:0009733|GO:0010067|GO:0010072|GO:0010089|GO:0005667|GO:0045449		homeobox-leucine zipper protein athb-15-like	IPR001356|IPR002913|IPR013978|IPR009057|IPR023393	GO:0003700|GO:0006355|GO:0043565|GO:0008289|GO:0003677
Dr01390	Aminotransferase-like, plant mobile domain				IPR019557
Dr01391
Dr01392	RNA-recognition motif (RRM) Nup35-type domain|Nucleoporin, NUP53				IPR007846|IPR017389	GO:0031965|GO:0055085
Dr01393	Plastocyanin-like|Cupredoxin	GO:0005488|GO:0016023		early nodulin-like protein 7	IPR003245|IPR008972	GO:0005507|GO:0009055
Dr01394		GO:0046872		metallothionein-like protein
Dr01395	Glycoside hydrolase, family 5|Glycoside hydrolase, superfamily|Glycoside hydrolase, catalytic domain	GO:0004553|GO:0016023|GO:0005975	EC:3.2.1.0	mannan endo- -beta-mannosidase 2-like	IPR001547|IPR017853|IPR013781	GO:0004553|GO:0005975|GO:0003824
Dr01396	Protein kinase domain|Protein kinase-like domain|Serine/threonine- / dual specificity protein kinase, catalytic domain|Protein kinase, ATP binding site|Serine/threonine-protein kinase, active site	GO:0005886|GO:0006468|GO:0005524|GO:0004674|GO:0009069	EC:2.7.11.0	probable serine threonine-protein kinase at1g54610-like	IPR000719|IPR011009|IPR002290|IPR017441|IPR008271	GO:0004672|GO:0005524|GO:0006468|GO:0016772|GO:0004674
Dr01397	Protein kinase domain|WD40 repeat|G-protein beta WD-40 repeat|WD40-repeat-containing domain|Protein kinase-like domain|WD40/YVTN repeat-like-containing domain|WD40 repeat, conserved site	GO:0008152|GO:0016772		protein spa1-related 3-like	IPR000719|IPR001680|IPR017986|IPR011009|IPR015943|IPR020472|IPR019775	GO:0004672|GO:0005524|GO:0006468|GO:0005515|GO:0016772
Dr01398	Serine-threonine/tyrosine-protein kinase catalytic domain|Protein kinase-like domain|Serine/threonine- / dual specificity protein kinase, catalytic domain|Protein kinase domain|Serine/threonine-protein kinase, active site	GO:0005829|GO:0005739|GO:0004713|GO:0005524|GO:0000186|GO:0004709|GO:0005886|GO:0007178|GO:0009069	EC:2.7.10.0|EC:2.7.11.25	protein kinase	IPR001245|IPR011009|IPR002290|IPR000719|IPR008271	GO:0004672|GO:0006468|GO:0016772|GO:0005524|GO:0004674
Dr01399	Protein kinase domain|Leucine-rich repeat|Leucine rich repeat 4|Protein kinase-like domain|Serine/threonine- / dual specificity protein kinase, catalytic domain|Protein kinase, ATP binding site|Serine/threonine-protein kinase, active site	GO:0004672|GO:0016023|GO:0016310|GO:0016020		receptor-like protein kinase hsl1-like	IPR000719|IPR001611|IPR025875|IPR011009|IPR002290|IPR017441|IPR008271	GO:0004672|GO:0005524|GO:0006468|GO:0005515|GO:0016772|GO:0004674
Dr01400	Protein kinase domain|Protein kinase-like domain|Serine/threonine- / dual specificity protein kinase, catalytic domain|Serine/threonine-protein kinase, active site	GO:0006468|GO:0004674|GO:0016491|GO:0016023|GO:0000166|GO:0016020|GO:0000165|GO:0009069	EC:2.7.11.0	protein	IPR000719|IPR011009|IPR002290|IPR008271	GO:0004672|GO:0005524|GO:0006468|GO:0016772|GO:0004674
Dr01401	Protein kinase domain|Leucine-rich repeat|Leucine-rich repeat-containing N-terminal, type 2|Leucine rich repeat 4|Protein kinase-like domain|Serine/threonine- / dual specificity protein kinase, catalytic domain|Leucine-rich repeat, typical subtype|Serine/threonine-protein kinase, active site	GO:0004672|GO:0016023|GO:0016310|GO:0016020		receptor-like protein kinase hsl1-like	IPR000719|IPR001611|IPR013210|IPR025875|IPR011009|IPR002290|IPR003591|IPR008271	GO:0004672|GO:0005524|GO:0006468|GO:0005515|GO:0016772|GO:0004674
Dr01402		GO:0009536		uncharacterized protein loc100853124
Dr01403	IQ motif, EF-hand binding site|Domain of unknown function DUF4005				IPR000048|IPR025064	GO:0005515
Dr01404	Profilin|Profilin conserved site	GO:0030036|GO:0005856|GO:0005737|GO:0003779		profilin	IPR005455|IPR027310	GO:0003779|GO:0030036
Dr01405	Profilin|Profilin conserved site	GO:0030036|GO:0005856|GO:0003779|GO:0009524|GO:0005634		profilin-like protein	IPR005455|IPR027310	GO:0003779|GO:0030036
Dr01406	Early nodulin 93 ENOD93 protein	GO:0005739		enod93 protein	IPR005050
Dr01407
Dr01408
Dr01409	Acid phosphatase (Class B)|HAD-like domain|Acid phosphatase, plant|Vegetative storage protein/acid phosphatase	GO:0016023|GO:0005773|GO:0003993|GO:0005886|GO:0006771|GO:0019497	EC:3.1.3.2	acid phosphatase 1	IPR005519|IPR023214|IPR010028|IPR014403	GO:0003993
Dr01410	Acid phosphatase (Class B)|HAD-like domain|Acid phosphatase, plant|Vegetative storage protein/acid phosphatase	GO:0016023|GO:0005773|GO:0003993|GO:0005886|GO:0006771|GO:0019497	EC:3.1.3.2	acid phosphatase 1	IPR005519|IPR023214|IPR010028|IPR014403	GO:0003993
Dr01411	Acid phosphatase (Class B)	GO:0016023|GO:0016787		acid phosphatase	IPR005519	GO:0003993
Dr01412	FAE1/Type III polyketide synthase-like protein|3-Oxoacyl-[acyl-carrier-protein (ACP)] synthase III C-terminal|Thiolase-like|Thiolase-like, subgroup|Very-long-chain 3-ketoacyl-CoA synthase	GO:0016740|GO:0008152		3-ketoacyl- synthase	IPR013601|IPR013747|IPR016039|IPR016038|IPR012392	GO:0006633|GO:0016020|GO:0016747|GO:0008610|GO:0003824|GO:0008152	EC:2.3.1.199|EC:2.3.1.180	KEGG: 00062+2.3.1.199|MetaCyc: PWY-5080|MetaCyc: PWY-6433|MetaCyc: PWY-7036|UniPathway: UPA00094|KEGG: 00061+2.3.1.180|MetaCyc: PWY-4381|MetaCyc: PWY-6519|UniPathway: UPA00094
Dr01413	NAC domain	GO:0003677|GO:0016023|GO:0006355		nac domain ipr003441	IPR003441	GO:0003677|GO:0006355
Dr01414	Peptidase M16, N-terminal|Peptidase M16, C-terminal domain|Metalloenzyme, LuxS/M16 peptidase-like|Peptidase M16 domain|Peptidase M16, zinc-binding site	GO:0022900|GO:0008121|GO:0009651|GO:0046872|GO:0005750|GO:0005741|GO:0004222|GO:0006508|GO:0005758|GO:0005524|GO:0005759|GO:0009507|GO:0005886|GO:0006118|GO:0006119|GO:0015992|GO:0045285	EC:1.10.2.2|EC:3.4.24.0	mitochondrial-processing peptidase subunit alpha	IPR011765|IPR007863|IPR011249|IPR011237|IPR001431	GO:0003824|GO:0046872|GO:0004222|GO:0006508
Dr01415	PPPDE putative peptidase domain				IPR008580		EC:3.4.-.-	KEGG: 00310+3.4.-.-|KEGG: 00550+3.4.-.-|KEGG: 00780+3.4.-.-
Dr01416	NUDIX hydrolase domain|Nudix hydrolase 6-like|NUDIX hydrolase domain-like|NUDIX hydrolase, conserved site	GO:0016787		mutt domain	IPR000086|IPR015797|IPR003293|IPR020084	GO:0016787	EC:3.6.1.-	KEGG: 00230+3.6.1.-|KEGG: 00790+3.6.1.-
Dr01417	Phosphofructokinase domain|Phosphofructokinase|Pyrophosphate-dependent phosphofructokinase TP0108	GO:0006002|GO:0005886|GO:0016310|GO:0003872|GO:0005945|GO:0047334|GO:0005524|GO:0006096|GO:0006000|GO:0006012|GO:0006013|GO:0006094|GO:0006098	EC:2.7.1.11|EC:2.7.1.90	6-phosphofructokinase 3-like	IPR000023|IPR022953|IPR012004	GO:0003872|GO:0005945|GO:0006096|GO:0006002|GO:0005524	EC:2.7.1.11	KEGG: 00010+2.7.1.11|KEGG: 00030+2.7.1.11|KEGG: 00051+2.7.1.11|KEGG: 00052+2.7.1.11|KEGG: 00680+2.7.1.11|MetaCyc: PWY-1042|MetaCyc: PWY-1861|MetaCyc: PWY-5484|Reactome: REACT_474|UniPathway: UPA00109|KEGG: 00010+2.7.1.11|KEGG: 00030+2.7.1.11|KEGG: 00051+2.7.1.11|KEGG: 00052+2.7.1.11|KEGG: 00680+2.7.1.11|MetaCyc: PWY-1042|MetaCyc: PWY-1861|MetaCyc: PWY-5484|UniPathway: UPA00109
Dr01418	Protein kinase domain|Protein kinase-like domain|Serine/threonine- / dual specificity protein kinase, catalytic domain|Protein kinase, ATP binding site|Serine/threonine-protein kinase, active site	GO:0005730|GO:0043987|GO:0005524|GO:0005819|GO:0035175|GO:0009069		serine threonine-protein kinase aurora-1	IPR000719|IPR011009|IPR002290|IPR017441|IPR008271	GO:0004672|GO:0005524|GO:0006468|GO:0016772|GO:0004674
Dr01419		GO:0016788		alpha beta fold family expressed
Dr01420	DNA/RNA helicase, DEAD/DEAH box type, N-terminal|Helicase, C-terminal|P-loop containing nucleoside triphosphate hydrolase|Helicase, superfamily 1/2, ATP-binding domain|RNA helicase, DEAD-box type, Q motif|RNA helicase, ATP-dependent, DEAD-box, conserved site	GO:0003676|GO:0000166|GO:0004386		protein	IPR011545|IPR001650|IPR027417|IPR014001|IPR014014|IPR000629	GO:0003676|GO:0005524|GO:0008026|GO:0004386
Dr01421	Ribosomal protein L37, mitochondrial	GO:0005739		mitochondrial ribosomal protein l37	IPR013870
Dr01422	Lipase, GDSL|SGNH hydrolase-type esterase domain	GO:0016023		gdsl esterase lipase	IPR001087|IPR013831	GO:0006629|GO:0016788|GO:0016787
Dr01423
Dr01424	Epsin domain, N-terminal|ENTH/VHS|Epsin-like, N-terminal				IPR001026|IPR008942|IPR013809
Dr01425	Target SNARE coiled-coil domain|Syntaxin/epimorphin, conserved site	GO:0005484|GO:0005886|GO:0005783|GO:0006612		syntaxin-71	IPR000727|IPR006012	GO:0005515|GO:0005484|GO:0006886|GO:0016020		Reactome: REACT_11184
Dr01426	Cation/H+ exchanger	GO:0015299|GO:0055085|GO:0006812|GO:0016021|GO:0005739|GO:0006885		potassium efflux antiporter	IPR006153	GO:0006812|GO:0015299|GO:0016021|GO:0055085
Dr01427	Hyaluronan/mRNA-binding protein|Stm1, N-terminal	GO:0044424		transcription factor	IPR006861|IPR019084
Dr01428	Protein kinase domain|Serine-threonine/tyrosine-protein kinase catalytic domain|Protein kinase-like domain|Concanavalin A-like lectin/glucanase, subgroup|Rossmann-like alpha/beta/alpha sandwich fold	GO:0016310|GO:0004672|GO:0005739		somatic embryogenesis receptor kinase	IPR000719|IPR001245|IPR011009|IPR013320|IPR014729	GO:0004672|GO:0005524|GO:0006468|GO:0016772
Dr01429	ABC transporter-like|ABC transporter, transmembrane domain|P-loop containing nucleoside triphosphate hydrolase|ABC transporter type 1, transmembrane domain|AAA+ ATPase domain|ABC transporter, conserved site	GO:0009987|GO:0006810|GO:0044710|GO:0016887|GO:0000166|GO:0005773|GO:0016020	EC:3.6.1.3	abc transporter c family member 8-like	IPR003439|IPR001140|IPR027417|IPR011527|IPR003593|IPR017871	GO:0005524|GO:0016887|GO:0006810|GO:0016021|GO:0042626|GO:0055085|GO:0000166|GO:0017111
Dr01430	Pentatricopeptide repeat	GO:0005739		pentatricopeptide repeat-containing protein at2g15690-like	IPR002885
Dr01431	Homeobox KN domain|POX domain|Homeodomain-like|Homeobox domain	GO:0003677		homeobox protein ath1	IPR008422|IPR006563|IPR009057|IPR001356	GO:0003677|GO:0006355|GO:0003700|GO:0043565
Dr01432	Mitochondrial substrate/solute carrier|Mitochondrial carrier protein|Mitochondrial carrier domain	GO:0005743|GO:0055085|GO:0016021|GO:0009536		mitochondrial substrate carrier family protein	IPR018108|IPR023395|IPR002067	GO:0055085
Dr01433	Petal formation-expressed				IPR027949
Dr01434	Ndr|Pollen specific protein SF21	GO:0060918		pollen-specific protein sf21-like	IPR004142|IPR015511
Dr01435	Zinc finger, Dof-type|Domain of unknown function DUF4283|Zinc finger, CCHC-type	GO:0003677|GO:0008270|GO:0006355		dof zinc finger	IPR003851|IPR025558|IPR001878	GO:0003677|GO:0006355|GO:0003676|GO:0008270
Dr01436	K Homology domain, type 1|K Homology domain	GO:0003723		far upstream element-binding protein	IPR004088|IPR004087	GO:0003723
Dr01437	Protein phosphatase 2A, regulatory subunit PR55|WD40-repeat-containing domain|WD40/YVTN repeat-like-containing domain|WD40 repeat|WD40 repeat, conserved site|Protein phosphatase 2A, regulatory subunit PR55, conserved site	GO:0000159|GO:0007165|GO:0008601		serine threonine protein phosphatase 2a 55 kda regulatory subunit b beta isoform-like	IPR000009|IPR017986|IPR015943|IPR001680|IPR019775|IPR018067	GO:0000159|GO:0007165|GO:0008601|GO:0005515
Dr01438	Cytokinin riboside 5'-monophosphate phosphoribohydrolase LOG	GO:0009536|GO:0005739		protein	IPR005269
Dr01439	Peptidase M24, structural domain|Aminopeptidase P N-terminal domain	GO:0009987|GO:0016805|GO:0030145|GO:0009536|GO:0004177	EC:3.4.13.0|EC:3.4.11.0	xaa-pro dipeptidase	IPR000994|IPR007865	GO:0009987|GO:0004177|GO:0030145
Dr01440	Domain of unknown function DUF3456|F-box domain				IPR021852|IPR001810	GO:0005515
Dr01441	Peptidase C13, legumain	GO:0016023|GO:0005739|GO:0006508|GO:0000323|GO:0004197	EC:3.4.22.0	vacuolar-processing enzyme	IPR001096	GO:0004197|GO:0006508
Dr01442	Domain of unknown function DUF239|Domain of unknown function DUF4409				IPR004314|IPR025521
Dr01443	EEIG1/EHBP1 N-terminal domain	GO:0005739		uncharacterized protein loc100834893	IPR019448
Dr01444	Protein kinase domain|Protein kinase-like domain|Serine/threonine- / dual specificity protein kinase, catalytic domain|Protein kinase, ATP binding site	GO:0016310|GO:0004672|GO:0000166|GO:0044424		casein kinase i isoform delta-like protein	IPR000719|IPR011009|IPR002290|IPR017441	GO:0004672|GO:0005524|GO:0006468|GO:0016772
Dr01445		GO:0044763		calmodulin binding
Dr01446	BTB/POZ|NPR1/NIM1-like, C-terminal|Ankyrin repeat-containing domain|BTB/POZ fold|BTB/POZ-like|Ankyrin repeat	GO:0006952|GO:0051707|GO:0044424		regulatory protein npr1	IPR013069|IPR021094|IPR020683|IPR011333|IPR000210|IPR002110	GO:0005515		UniPathway: UPA00143
Dr01447	SMAD/FHA domain				IPR008984	GO:0005515
Dr01448	Cation-transporting P-type ATPase, subfamily IV|P-type ATPase, A domain|Cation-transporting P-type ATPase|HAD-like domain|P-type ATPase, cytoplasmic domain N|P-type ATPase, phosphorylation site	GO:0008270|GO:0005739|GO:0016021|GO:0019829|GO:0005524|GO:0000287|GO:0004012|GO:0006812|GO:0015917	EC:3.6.3.1	aminophospholipid atpase	IPR006539|IPR008250|IPR023214|IPR023299|IPR001757|IPR018303	GO:0000287|GO:0004012|GO:0005524|GO:0015914|GO:0016021|GO:0000166|GO:0046872|GO:0006812|GO:0019829
Dr01449	GTP binding domain|TGS|P-loop containing nucleoside triphosphate hydrolase|TGS-like|Small GTP-binding protein domain|GTP1/OBG, conserved site	GO:0005525|GO:0016023|GO:0019003		p-loop containing nucleoside triphosphate hydrolase-like protein	IPR006073|IPR004095|IPR027417|IPR012676|IPR005225|IPR006074	GO:0005525	EC:6.1.1.3	KEGG: 00970+6.1.1.3
Dr01450	RNA recognition motif domain|Nucleotide-binding, alpha-beta plait	GO:0003676|GO:0030529|GO:0000166		heterogeneous nuclearribonucleoprotein a2	IPR000504|IPR012677	GO:0003676|GO:0000166
Dr01451	Glucose-methanol-choline oxidoreductase, C-terminal	GO:0016023|GO:0044710|GO:0003824		protein hothead precursor	IPR007867	GO:0016614|GO:0055114
Dr01452	Glucose-methanol-choline oxidoreductase, N-terminal|Glucose-methanol-choline oxidoreductase, C-terminal|Glucose-methanol-choline oxidoreductase	GO:0016023|GO:0044710|GO:0003824		protein hothead precursor	IPR000172|IPR007867|IPR012132	GO:0016614|GO:0050660|GO:0055114|GO:0006066|GO:0008812	EC:1.1.99.1	KEGG: 00260+1.1.99.1|UniPathway: UPA00529
Dr01453	Ectonucleotide pyrophosphatase/phosphodiesterase family|Type I phosphodiesterase/nucleotide pyrophosphatase/phosphate transferase|Alkaline-phosphatase-like, core domain	GO:0005773|GO:0008152|GO:0004528	EC:3.1.4.1	nucleotide pyrophosphatase-like protein	IPR024873|IPR002591|IPR017850	GO:0003824|GO:0008152
Dr01454	Glucose-methanol-choline oxidoreductase, N-terminal|Glucose-methanol-choline oxidoreductase, C-terminal|Glucose-methanol-choline oxidoreductase	GO:0071704|GO:0044699|GO:0016023|GO:0044281|GO:0009987|GO:0016614|GO:0055114		protein hothead-like	IPR000172|IPR007867|IPR012132	GO:0016614|GO:0050660|GO:0055114|GO:0006066|GO:0008812	EC:1.1.99.1	KEGG: 00260+1.1.99.1|UniPathway: UPA00529
Dr01455	Glycosyl transferase, family 31	GO:0008378|GO:0016020		galactosyltransferase family protein	IPR002659	GO:0006486|GO:0008378|GO:0016020		UniPathway: UPA00378
Dr01456
Dr01457	Nonaspanin (TM9SF)|Major facilitator superfamily domain, general substrate transporter	GO:0006882|GO:0006878|GO:0005794|GO:0005886|GO:0016021|GO:0005634|GO:0005739		protein	IPR004240|IPR016196	GO:0016021
Dr01458	Cytochrome P450|Zinc finger, GATA-type|Cytochrome P450, E-class, group I|Zinc finger, NHR/GATA-type|Cytochrome P450, conserved site	GO:0016132|GO:0005488|GO:0004497|GO:0048366		cytochrome p450	IPR001128|IPR000679|IPR013088|IPR002401|IPR017972	GO:0005506|GO:0016705|GO:0020037|GO:0055114|GO:0003700|GO:0006355|GO:0008270|GO:0043565		Reactome: REACT_13433
Dr01459	Ribonuclease III domain	GO:0003723|GO:0004525|GO:0009536|GO:0006396|GO:0051252	EC:3.1.26.3	protein	IPR000999	GO:0003723|GO:0004525|GO:0006396
Dr01460
Dr01461	Nucleosome assembly protein (NAP)	GO:0006259|GO:0044763|GO:0050896|GO:0044424		nucleosome assembly protein 1	IPR002164	GO:0005634|GO:0006334
Dr01462	Glycoside hydrolase, family 35|D-galactoside/L-rhamnose binding SUEL lectin domain|Galactose-binding domain-like|Glycoside hydrolase, superfamily|Glycoside hydrolase, catalytic domain|Glycoside hydrolase, family 35, conserved site	GO:0009505|GO:0016023|GO:0030246|GO:0004565|GO:0048046|GO:0006012|GO:0006027|GO:0006687|GO:0009341|GO:0046486	EC:3.2.1.23	bgal_aspof ame: full=beta-galactosidase short=lactase flags: precursor	IPR001944|IPR000922|IPR008979|IPR017853|IPR013781|IPR019801	GO:0004553|GO:0005975|GO:0030246|GO:0003824	EC:3.2.1.23	KEGG: 00052+3.2.1.23|KEGG: 00511+3.2.1.23|KEGG: 00531+3.2.1.23|KEGG: 00600+3.2.1.23|KEGG: 00604+3.2.1.23|MetaCyc: PWY-6791|MetaCyc: PWY-6807
Dr01463	ATPase, V1 complex, subunit C	GO:0043255|GO:0000221|GO:0000325|GO:0046961|GO:0009809|GO:0009826|GO:0015991|GO:0009507|GO:0005886|GO:0006119		v-type proton atpase subunit c	IPR004907	GO:0015078|GO:0015991|GO:0033180
Dr01464	Fanconi Anaemia group E protein, C-terminal				IPR021025
Dr01465	Oxoglutarate/iron-dependent dioxygenase|Isopenicillin N synthase-like	GO:0009815|GO:0055114|GO:0016706	EC:1.14.17.4|EC:1.14.11.0	1-aminocyclopropane-1-carboxylate oxidase	IPR005123|IPR027443	GO:0016491|GO:0016706|GO:0055114
Dr01466	Mycolic acid cyclopropane synthase	GO:0008610|GO:0032259|GO:0005739|GO:0005886|GO:0008168	EC:2.1.1.0	coclaurine n-methyltransferase	IPR003333	GO:0008610
Dr01467	Protein kinase domain|Protein kinase-like domain|Concanavalin A-like lectin/glucanase, subgroup|Rossmann-like alpha/beta/alpha sandwich fold|AGC-kinase, C-terminal|Serine/threonine- / dual specificity protein kinase, catalytic domain|Serine/threonine-protein kinase, active site	GO:0004672		u-box domain-containing protein 35-like	IPR000719|IPR011009|IPR013320|IPR014729|IPR000961|IPR002290|IPR008271	GO:0004672|GO:0005524|GO:0006468|GO:0016772|GO:0004674
Dr01468	RNA polymerase II-associated protein 1, C-terminal|RNA polymerase II-associated protein 1, N-terminal|Armadillo-type fold|Armadillo-like helical				IPR013929|IPR013930|IPR016024|IPR011989	GO:0005488
Dr01469		GO:0005840|GO:0003735|GO:0006412|GO:0042254		uncharacterized protein
Dr01470	Zinc finger, FYVE/PHD-type|Zinc finger, RING/FYVE/PHD-type|Zinc finger, PHD-type|Zinc finger, PHD-finger|Zinc finger, PHD-type, conserved site	GO:0008270		protein	IPR011011|IPR013083|IPR001965|IPR019787|IPR019786	GO:0005515|GO:0008270
Dr01471	Phosphoesterase domain|Serine/threonine-specific protein phosphatase/bis(5-nucleosyl)-tetraphosphatase	GO:0005737|GO:0046872|GO:0004721|GO:0005886|GO:2000012|GO:0005634|GO:0006470	EC:3.1.3.16	protein	IPR004843|IPR006186	GO:0016787
Dr01472	DNA-binding WRKY|PAS domain|PAC motif	GO:0050794		protein twin lov 1	IPR003657|IPR000014|IPR001610	GO:0003700|GO:0006355|GO:0043565|GO:0004871|GO:0007165
Dr01473	Proton-dependent oligopeptide transporter family|Major facilitator superfamily domain, general substrate transporter	GO:0009624|GO:0006810|GO:0005886|GO:0005215		nitrate transporter -like	IPR000109|IPR016196	GO:0005215|GO:0006810|GO:0016020		Reactome: REACT_15518|Reactome: REACT_19419
Dr01474	Small GTPase superfamily, Ras type|Small GTPase superfamily|P-loop containing nucleoside triphosphate hydrolase|Small GTPase superfamily, Rho type|Small GTPase superfamily, Rab type|Ran GTPase|Small GTP-binding protein domain	GO:0005525|GO:0005886|GO:0016787|GO:0007264|GO:0005739|GO:0015031		ras-related protein rab7	IPR020849|IPR001806|IPR027417|IPR003578|IPR003579|IPR002041|IPR005225	GO:0003924|GO:0005525|GO:0006184|GO:0007165|GO:0016020|GO:0007264|GO:0005622|GO:0015031|GO:0006886|GO:0006913		Reactome: REACT_11044
Dr01475	Protein of unknown function DUF1475	GO:0016020|GO:0016023		uncharacterized protein loc100784044	IPR009943
Dr01476	FeS cluster biogenesis|FeS cluster insertion protein|FeS cluster insertion, C-terminal, conserved site	GO:0016226|GO:0005198|GO:0051536|GO:0009570		iron-sulfur assembly protein	IPR000361|IPR016092|IPR017870	GO:0005198|GO:0016226|GO:0051536
Dr01477	Protein kinase domain|Leucine-rich repeat|Leucine-rich repeat-containing N-terminal, type 2|Protein kinase-like domain|Serine/threonine- / dual specificity protein kinase, catalytic domain|Leucine-rich repeat, typical subtype|Protein kinase, ATP binding site|Serine/threonine-protein kinase, active site	GO:0043231|GO:0044444|GO:0016772		protein kinase xa21	IPR000719|IPR001611|IPR013210|IPR011009|IPR002290|IPR003591|IPR017441|IPR008271	GO:0004672|GO:0005524|GO:0006468|GO:0005515|GO:0016772|GO:0004674
Dr01478	DNA-binding WRKY				IPR003657	GO:0003700|GO:0006355|GO:0043565
Dr01479	Protein kinase domain|Leucine-rich repeat|Leucine-rich repeat-containing N-terminal, type 2|Leucine rich repeat 4|Protein kinase-like domain|Serine/threonine- / dual specificity protein kinase, catalytic domain|Leucine-rich repeat, typical subtype|Protein kinase, ATP binding site|Serine/threonine-protein kinase, active site	GO:0044763|GO:0016772|GO:0043231|GO:0050896|GO:0044444|GO:0008152		protein	IPR000719|IPR001611|IPR013210|IPR025875|IPR011009|IPR002290|IPR003591|IPR017441|IPR008271	GO:0004672|GO:0005524|GO:0006468|GO:0005515|GO:0016772|GO:0004674
Dr01480
Dr01481
Dr01482	Glutamyl/glutaminyl-tRNA synthetase|Glutamyl/glutaminyl-tRNA synthetase, class Ib, catalytic domain|Glutamyl/glutaminyl-tRNA synthetase, class Ib, anti-codon binding domain|Glutaminyl-tRNA synthetase, class Ib, non-specific RNA-binding domain 2|Glutaminyl-tRNA synthetase, class Ib, non-specific RNA-binding domain, N-terminal|Ribosomal protein L25/Gln-tRNA synthetase, anti-codon-binding domain|Glu…	GO:0004819|GO:0048481|GO:0005524|GO:0005737|GO:0006425	EC:6.1.1.18	trna-glutamine synthetase	IPR000924|IPR020058|IPR020059|IPR007638|IPR007639|IPR011035|IPR020061|IPR020056|IPR014729|IPR004514|IPR001412	GO:0000166|GO:0005524|GO:0005737|GO:0016876|GO:0043039|GO:0004812|GO:0006418|GO:0004819|GO:0006425|GO:0006412	EC:6.1.1.18|EC:6.1.1.17	Reactome: REACT_71|KEGG: 00970+6.1.1.18|KEGG: 00860+6.1.1.17|KEGG: 00970+6.1.1.17|MetaCyc: PWY-5188|Reactome: REACT_71
Dr01483	Beta-lactamase-like	GO:0042780|GO:0042781|GO:0051252		nuclear ribonuclease z	IPR001279	GO:0016787
Dr01484
Dr01485	Protein kinase domain|Leucine-rich repeat|Leucine-rich repeat-containing N-terminal, type 2|Leucine rich repeat 4|Protein kinase-like domain|Serine/threonine- / dual specificity protein kinase, catalytic domain|Leucine-rich repeat, typical subtype|Protein kinase, ATP binding site|Serine/threonine-protein kinase, active site	GO:0016023		protein kinase xa21	IPR000719|IPR001611|IPR013210|IPR025875|IPR011009|IPR002290|IPR003591|IPR017441|IPR008271	GO:0004672|GO:0005524|GO:0006468|GO:0005515|GO:0016772|GO:0004674
Dr01486	Leucine-rich repeat|Serine-threonine/tyrosine-protein kinase catalytic domain|Leucine rich repeat 4|Protein kinase-like domain|Serine/threonine- / dual specificity protein kinase, catalytic domain|Leucine-rich repeat, typical subtype|Protein kinase domain|Protein kinase, ATP binding site|Serine/threonine-protein kinase, active site	GO:0043231|GO:0044444		protein kinase xa21	IPR001611|IPR001245|IPR025875|IPR011009|IPR002290|IPR003591|IPR000719|IPR017441|IPR008271	GO:0005515|GO:0004672|GO:0006468|GO:0016772|GO:0005524|GO:0004674
Dr01487	Protein kinase domain|Leucine-rich repeat|Leucine-rich repeat-containing N-terminal, type 2|Protein kinase-like domain|Concanavalin A-like lectin/glucanase, subgroup|Serine/threonine- / dual specificity protein kinase, catalytic domain|Leucine-rich repeat, typical subtype|Protein kinase, ATP binding site|Serine/threonine-protein kinase, active site	GO:0044763|GO:0016772|GO:0044464|GO:0050896|GO:0008152		protein	IPR000719|IPR001611|IPR013210|IPR011009|IPR013320|IPR002290|IPR003591|IPR017441|IPR008271	GO:0004672|GO:0005524|GO:0006468|GO:0005515|GO:0016772|GO:0004674
Dr01488	Pectate lyase/Amb allergen|AmbAllergen|Pectin lyase fold/virulence factor|Pectin lyase fold				IPR002022|IPR011050|IPR012334|IPR018082
Dr01489	YLP motif-containing protein 1|P-loop containing nucleoside triphosphate hydrolase				IPR026314|IPR027417	GO:0005634
Dr01490	Eukaryotic porin/Tom40|Porin domain	GO:0055085|GO:0044070|GO:0005618|GO:0015288|GO:0005730|GO:0042742|GO:0009941|GO:0005741|GO:0008308|GO:0046930|GO:0005773|GO:0005886		voltage-dependent anion channel	IPR027246|IPR023614	GO:0005741|GO:0055085
Dr01491	Domain of unknown function DUF1338	GO:0005739		uncharacterized protein	IPR009770
Dr01492	Homeobox domain|Leucine zipper, homeobox-associated|Helix-turn-helix motif|Homeodomain-like|Homeobox, conserved site				IPR001356|IPR003106|IPR009057|IPR000047|IPR017970	GO:0003700|GO:0006355|GO:0043565|GO:0003677|GO:0005634|GO:0000976
Dr01493	ABC transporter A, ABCA|ABC transporter-like|P-loop containing nucleoside triphosphate hydrolase|AAA+ ATPase domain|ABC transporter, conserved site	GO:0016787|GO:0016020		abc transporter a family member 7	IPR026082|IPR003439|IPR027417|IPR003593|IPR017871	GO:0005524|GO:0016887|GO:0000166|GO:0017111
Dr01494	ABC transporter A, ABCA|ABC transporter-like|P-loop containing nucleoside triphosphate hydrolase|AAA+ ATPase domain|ABC transporter, conserved site	GO:0016887|GO:0000166|GO:0016020	EC:3.6.1.3	abc transporter a family member 7-like	IPR026082|IPR003439|IPR027417|IPR003593|IPR017871	GO:0005524|GO:0016887|GO:0000166|GO:0017111
Dr01495	Leucine-rich repeat|Serine-threonine/tyrosine-protein kinase catalytic domain|Protein kinase-like domain|Leucine-rich repeat, typical subtype|Protein kinase domain	GO:0016772		probable lrr receptor-like serine threonine-protein kinase at1g14390-like	IPR001611|IPR001245|IPR011009|IPR003591|IPR000719	GO:0005515|GO:0004672|GO:0006468|GO:0016772|GO:0005524
Dr01496	Ubiquitin-conjugating enzyme, E2|Ubiquitin-conjugating enzyme/RWD-like|Ubiquitin-conjugating enzyme, active site	GO:0009910|GO:0033523|GO:0009650|GO:0009965|GO:0010228|GO:0004842	EC:6.3.2.19	ubiquitin-conjugating enzyme	IPR000608|IPR016135|IPR023313	GO:0016881		UniPathway: UPA00143
Dr01497	RNA recognition motif domain|Polyadenylate-binding protein/Hyperplastic disc protein|Nucleotide-binding, alpha-beta plait|RNA recognition motif domain, eukaryote|Polyadenylate binding protein, human types 1, 2, 3, 4	GO:0044238|GO:0003676|GO:0044260|GO:0010467		poly -binding protein	IPR000504|IPR002004|IPR012677|IPR003954|IPR006515	GO:0003676|GO:0003723|GO:0000166
Dr01498	DNA/RNA helicase, DEAD/DEAH box type, N-terminal|Helicase, C-terminal|P-loop containing nucleoside triphosphate hydrolase|Helicase, superfamily 1/2, ATP-binding domain|RNA helicase, DEAD-box type, Q motif	GO:0003723|GO:0005739|GO:0008026|GO:0005524		dead-box atp-dependent rna helicase 39	IPR011545|IPR001650|IPR027417|IPR014001|IPR014014	GO:0003676|GO:0005524|GO:0008026|GO:0004386
Dr01499
Dr01500	Cytochrome P450|Cytochrome P450, E-class, group I|Cytochrome P450, conserved site	GO:0005488|GO:0016023|GO:0004497|GO:0016705|GO:0022900		cytochrome p450	IPR001128|IPR002401|IPR017972	GO:0005506|GO:0016705|GO:0020037|GO:0055114		Reactome: REACT_13433
Dr01501	Endonuclease/exonuclease/phosphatase|Inositol polyphosphate-related phosphatase	GO:0006796|GO:0019637|GO:0044710|GO:0009536		type i inositol- -trisphosphate 5-phosphatase 1-like	IPR005135|IPR000300	GO:0046856
Dr01502	UDP-glucuronosyl/UDP-glucosyltransferase	GO:0005739|GO:0016740		sterol glucosyltransferase-like protein	IPR002213	GO:0008152|GO:0016758
Dr01503	Glucose/ribitol dehydrogenase|NAD(P)-binding domain	GO:0016491|GO:0055114|GO:0000166		dehydrogenase reductase sdr family member 12	IPR016040|IPR002347
Dr01504	Syntaxin, N-terminal domain|Target SNARE coiled-coil domain|t-SNARE|Syntaxin/epimorphin, conserved site				IPR006011|IPR000727|IPR010989|IPR006012	GO:0016020|GO:0005515|GO:0016192|GO:0005484|GO:0006886		Reactome: REACT_11184
Dr01505	Mitochondrial substrate/solute carrier|Mitochondrial carrier protein|Mitochondrial carrier domain	GO:0006810|GO:0043231|GO:0044699|GO:0044444|GO:0016020		s-adenosylmethionine carrier 1	IPR018108|IPR023395|IPR002067	GO:0055085
Dr01506	Peptidase M14, carboxypeptidase A	GO:0004181|GO:0010082|GO:0006508|GO:0008270	EC:3.4.17.0	carboxypeptidase d	IPR000834	GO:0004181|GO:0006508|GO:0008270
Dr01507	NADH:ubiquinone oxidoreductase, 51kDa subunit|Soluble ligand binding domain|NADH ubiquinone oxidoreductase, F subunit, iron sulphur binding|NADH ubiquinone oxidoreductase, F subunit|NADH:ubiquinone oxidoreductase, 51kDa subunit, conserved site	GO:0051287|GO:0008137|GO:0010181|GO:0005747|GO:0051539|GO:0006120|GO:0006744|GO:0006814|GO:0015992	EC:1.6.5.3	nadh dehydrogenase	IPR011538|IPR019554|IPR019575|IPR011537|IPR001949	GO:0016651|GO:0051539|GO:0055114|GO:0010181|GO:0051287|GO:0008137
Dr01508	DNA-binding WRKY	GO:0003677|GO:0009536		wrky transcription factor	IPR003657	GO:0003700|GO:0006355|GO:0043565
Dr01509	GIGANTEA	GO:2000028|GO:0042752|GO:0009266|GO:0006950|GO:0005634		gigantea	IPR026211	GO:2000028
Dr01510
Dr01511	Chlorophyll a/b binding protein domain	GO:0009535|GO:0009642		one helix protein 2	IPR023329
Dr01512	NAC domain				IPR003441	GO:0003677|GO:0006355
Dr01513	Aldehyde dehydrogenase domain|Aldehyde/histidinol dehydrogenase|Aldehyde dehydrogenase, C-terminal	GO:0001758|GO:0050269|GO:0009699|GO:0055114|GO:0042572	EC:1.2.1.36|EC:1.2.1.68	aldehyde dehydrogenase family 2 member c4-like	IPR015590|IPR016161|IPR016163	GO:0008152|GO:0016491|GO:0055114|GO:0016620
Dr01514		GO:0044707|GO:0044464|GO:0009856		exocyst complex
Dr01515	Aldehyde dehydrogenase domain|Aldehyde/histidinol dehydrogenase|Aldehyde dehydrogenase, N-terminal	GO:0001758|GO:0050269|GO:0009699|GO:0055114|GO:0042572	EC:1.2.1.36|EC:1.2.1.68	aldehyde dehydrogenase	IPR015590|IPR016161|IPR016162	GO:0008152|GO:0016491|GO:0055114
Dr01516	NAC domain				IPR003441	GO:0003677|GO:0006355
Dr01517	Ovate protein family, C-terminal				IPR006458
Dr01518
Dr01519	Ovate protein family, C-terminal				IPR006458
Dr01520
Dr01521	Heat shock protein 70 family	GO:0046686|GO:0005886|GO:0005618|GO:0005524|GO:0032440|GO:0009408|GO:0055114	EC:1.3.1.74	97 kda heat shock	IPR013126
Dr01522	Heat shock protein 70 family	GO:0016491|GO:0006950|GO:0000166|GO:0071944		97 kda heat shock	IPR013126
Dr01523	Heat shock protein 70 family	GO:0046686|GO:0005886|GO:0005618|GO:0005524|GO:0032440|GO:0009408|GO:0055114	EC:1.3.1.74	97 kda heat shock	IPR013126
Dr01524	DNA mismatch repair protein MutS-homologue MSH6|DNA mismatch repair protein MutS-like, N-terminal|DNA mismatch repair protein MutS, N-terminal	GO:0006310|GO:0030983|GO:0005524|GO:0006298|GO:0007127|GO:0044428		dna mismatch repair protein msh6-2	IPR015536|IPR007695|IPR016151	GO:0006298|GO:0005524|GO:0030983
Dr01525	Ribosomal protein L25, short-form|Ribosomal protein L25/Gln-tRNA synthetase, anti-codon-binding domain|Ribosomal protein L25, beta domain|Ribosomal protein L25/Gln-tRNA synthetase, beta-barrel domain	GO:0005840|GO:0050897|GO:0008097|GO:0003735|GO:0008270|GO:0006412|GO:0005739|GO:0042254		ribosomal l25 tl5 ctc n-terminal 5s rrna binding domain-containing protein	IPR020055|IPR011035|IPR020057|IPR020056	GO:0003735|GO:0005622|GO:0005840|GO:0006412|GO:0008097		Reactome: REACT_71
Dr01526		GO:0005515|GO:0043231		mar-binding filament-like protein 1-1-like
Dr01527	WD40 repeat|Coatomer, WD associated region|G-protein beta WD-40 repeat|WD40-repeat-containing domain|Tetratricopeptide-like helical|WD40/YVTN repeat-like-containing domain|Coatomer beta' subunit (COPB2)	GO:0030663|GO:0016905|GO:0030117|GO:0016192|GO:0006886|GO:0005198|GO:0009069|GO:0016310|GO:0016459	EC:2.7.11.7	coatomer subunit beta -2-like	IPR001680|IPR006692|IPR017986|IPR011990|IPR015943|IPR020472|IPR016453	GO:0005515|GO:0005198|GO:0006886|GO:0016192|GO:0030117		Reactome: REACT_11123
Dr01528	Leucine-rich repeat|Leucine-rich repeat, typical subtype	GO:0009505|GO:0008152|GO:0016491		extensin-like protein	IPR001611|IPR003591	GO:0005515
Dr01529	Ran binding domain|Nuclear pore complex, NUP2/50/61|Pleckstrin homology-like domain	GO:0005643|GO:0046907|GO:0005829		nucleoporin 50 protein	IPR000156|IPR015007|IPR011993	GO:0046907|GO:0005643
Dr01530	TMS membrane protein/tumour differentially expressed protein	GO:0016020		probable serine incorporator-like	IPR005016	GO:0016020
Dr01531	Arf GTPase activating protein	GO:0009987		arf-gap domain and fg repeats-containing protein	IPR001164	GO:0008060|GO:0008270|GO:0032312
Dr01532	Glycosyl transferase, family 1				IPR001296	GO:0009058
Dr01533	UDP-glucuronosyl/UDP-glucosyltransferase|EF-hand domain	GO:0035251|GO:0005739		anthocyanin 5-o-glucosyltransferase	IPR002213|IPR002048	GO:0008152|GO:0016758|GO:0005509
Dr01534	UDP-glucuronosyl/UDP-glucosyltransferase|EF-hand domain pair|EF-hand domain	GO:0044444|GO:0043231|GO:0016740		anthocyanin 5-o-glucosyltransferase	IPR002213|IPR011992|IPR002048	GO:0008152|GO:0016758|GO:0005509
Dr01535	UDP-glucuronosyl/UDP-glucosyltransferase	GO:0016740		udp-glycosyltransferase 75d1-like	IPR002213	GO:0008152|GO:0016758
Dr01536	UDP-glucuronosyl/UDP-glucosyltransferase	GO:0035251		protein	IPR002213	GO:0008152|GO:0016758
Dr01537	UDP-glucuronosyl/UDP-glucosyltransferase	GO:0035251|GO:0043231|GO:0044444		anthocyanin 5-o-glucosyltransferase	IPR002213	GO:0008152|GO:0016758
Dr01538	UDP-glucuronosyl/UDP-glucosyltransferase	GO:0044444|GO:0043231		anthocyanin 5-o-glucosyltransferase	IPR002213	GO:0008152|GO:0016758
Dr01539	UDP-glucuronosyl/UDP-glucosyltransferase	GO:0044444|GO:0043231|GO:0016740		anthocyanin 5-o-glucosyltransferase	IPR002213	GO:0008152|GO:0016758
Dr01540		GO:0008233		mitochondrial metalloendopeptidase oma1
Dr01541	UDP-glucuronosyl/UDP-glucosyltransferase	GO:0016758	EC:2.4.1.0	anthocyanin 5-o-glucosyltransferase	IPR002213	GO:0008152|GO:0016758
Dr01542	UDP-glucuronosyl/UDP-glucosyltransferase	GO:0044444|GO:0043231		anthocyanin 5-o-glucosyltransferase	IPR002213	GO:0008152|GO:0016758
Dr01543	UDP-glucuronosyl/UDP-glucosyltransferase	GO:0044444|GO:0043231		anthocyanin 5-o-glucosyltransferase	IPR002213	GO:0008152|GO:0016758
Dr01544	Enhancer of polycomb-like, N-terminal|Tudor domain				IPR019542|IPR002999
Dr01545
Dr01546	Crotonase superfamily	GO:0003824		3-hydroxyisobutyryl- hydrolase-like protein	IPR001753	GO:0003824|GO:0008152
Dr01547	Syntaxin, N-terminal domain|Target SNARE coiled-coil domain|t-SNARE|Syntaxin/epimorphin, conserved site	GO:0006810		syntaxin 32	IPR006011|IPR000727|IPR010989|IPR006012	GO:0016020|GO:0005515|GO:0016192|GO:0005484|GO:0006886		Reactome: REACT_11184
Dr01548	DDT domain|Homeodomain-like|DDT domain, subgroup|Homeobox domain|DDT domain superfamily				IPR004022|IPR009057|IPR018500|IPR001356|IPR018501	GO:0003677|GO:0003700|GO:0006355|GO:0043565
Dr01549	Bifunctional inhibitor/plant lipid transfer protein/seed storage helical domain				IPR016140
Dr01550	Zinc finger, RING-type|Zinc finger, RING/FYVE/PHD-type	GO:0016020		e3 ubiquitin-protein ligase at4g11680-like	IPR001841|IPR013083	GO:0005515|GO:0008270
Dr01551	Acyl-ACP thioesterase|Acyl-ACP-thioesterase, N-terminal	GO:0006633|GO:0016296|GO:0004320|GO:0016295|GO:0009536|GO:0005835|GO:0042967	EC:3.1.2.14	acyl-acp thioesterase	IPR002864|IPR021113	GO:0006633|GO:0016790	EC:3.1.2.-	KEGG: 00061+3.1.2.-|KEGG: 00360+3.1.2.-|KEGG: 00362+3.1.2.-|KEGG: 00592+3.1.2.-|KEGG: 00903+3.1.2.-
Dr01552	Pre-mRNA-splicing factor 38|Pre-mRNA-splicing factor 38, C-terminal	GO:0009651		pre-mrna-splicing factor 38b	IPR005037|IPR024767
Dr01553	Protein phosphatase 2A, regulatory B subunit, B56|Armadillo-type fold				IPR002554|IPR016024	GO:0000159|GO:0007165|GO:0008601|GO:0005488		Reactome: REACT_11045|Reactome: REACT_152|Reactome: REACT_383|Reactome: REACT_6900
Dr01554	Protein of unknown function DUF92, TMEM19	GO:0016020		uncharacterized protein	IPR002794	GO:0016021
Dr01555	FAR1 DNA binding domain|Zinc finger, SWIM-type|Zinc finger, PMZ-type				IPR004330|IPR007527|IPR006564	GO:0008270
Dr01556	Cyclin, N-terminal|Cyclin, C-terminal domain|Cyclin-like|Cyclin A/B/D/E	GO:0044238|GO:0007049|GO:0044260		cyclin a2	IPR006671|IPR004367|IPR013763|IPR014400	GO:0005634|GO:0000079|GO:0019901|GO:0051726		Reactome: REACT_152
Dr01557
Dr01558	Aminotransferase, class I/classII|Pyridoxal phosphate-dependent transferase|Pyridoxal phosphate-dependent transferase, major region, subdomain 1|Pyridoxal phosphate-dependent transferase, major region, subdomain 2|Aminotransferases, class-I, pyridoxal-phosphate-binding site	GO:0080130|GO:0030170|GO:0004069|GO:0000162|GO:0006107|GO:0006522|GO:0006525|GO:0006531|GO:0006534|GO:0006536|GO:0006560|GO:0006571|GO:0009094|GO:0009821|GO:0015976	EC:2.6.1.1	transaminase transferring nitrogenous groups	IPR004839|IPR015424|IPR015421|IPR015422|IPR004838	GO:0009058|GO:0030170|GO:0003824		Reactome: REACT_13
Dr01559	Oxoglutarate/iron-dependent dioxygenase|Non-haem dioxygenase N-terminal domain|Isopenicillin N synthase-like	GO:0050896|GO:0016706|GO:0044710	EC:1.14.11.0	gibberellin 3-oxidase	IPR005123|IPR026992|IPR027443	GO:0016491|GO:0016706|GO:0055114
Dr01560	WD40 repeat|LisH dimerisation motif, subgroup|WD40-repeat-containing domain|WD40/YVTN repeat-like-containing domain|LisH dimerisation motif|WD40 repeat, conserved site				IPR001680|IPR013720|IPR017986|IPR015943|IPR006594|IPR019775	GO:0005515
Dr01561		GO:0006811|GO:0009507|GO:0016020|GO:0015293		uncharacterized sodium-dependent transporter yocs-like
Dr01562	ABC transporter-like|ABC-2 type transporter|Plant PDR ABC transporter associated|P-loop containing nucleoside triphosphate hydrolase|AAA+ ATPase domain	GO:0015417|GO:0016021|GO:0006811|GO:0015416|GO:0006200|GO:0005886|GO:0006952|GO:0005524|GO:0046865|GO:0015846|GO:0015716|GO:0015748	EC:3.6.3.31|EC:3.6.3.28	atp-binding cassette	IPR003439|IPR013525|IPR013581|IPR027417|IPR003593	GO:0005524|GO:0016887|GO:0016020|GO:0000166|GO:0017111
Dr01563	ABC transporter-like|ABC-2 type transporter|Plant PDR ABC transporter associated|P-loop containing nucleoside triphosphate hydrolase|AAA+ ATPase domain	GO:0042626|GO:0022891|GO:0006200|GO:0005524|GO:0016020|GO:0006810		atp-binding cassette	IPR003439|IPR013525|IPR013581|IPR027417|IPR003593	GO:0005524|GO:0016887|GO:0016020|GO:0000166|GO:0017111
Dr01564	RNA recognition motif domain|Nucleotide-binding, alpha-beta plait	GO:0097159|GO:1901363		glycine-rich rna-binding	IPR000504|IPR012677	GO:0003676|GO:0000166
Dr01565	RuvA domain 2-like				IPR010994			Reactome: REACT_216
Dr01566	ADP/ATP carrier protein	GO:0009941|GO:0006810|GO:0005471|GO:0005524|GO:0016021		plastidic atp adp transporter	IPR004667	GO:0005471|GO:0005524|GO:0006810|GO:0016021
Dr01567	Monooxygenase, FAD-binding|Aromatic-ring hydroxylase-like	GO:0016023|GO:0008152|GO:0016491		3-hydroxybenzoate 6-hydroxylase	IPR002938|IPR003042	GO:0008152|GO:0016491
Dr01568	Alpha/beta hydrolase fold-1	GO:0010038|GO:0006979		monoglyceride lipase-like	IPR000073
Dr01569	Leucine-rich repeat|Leucine-rich repeat-containing N-terminal, type 2|Leucine-rich repeat, typical subtype	GO:0009987|GO:0004672|GO:0044464		protein kinase xa21 receptor type	IPR001611|IPR013210|IPR003591	GO:0005515
Dr01570	Leucine-rich repeat|Leucine rich repeat 4|Protein kinase-like domain|Concanavalin A-like lectin/glucanase, subgroup|Leucine-rich repeat, typical subtype	GO:0044763|GO:0016772|GO:0050896		protein	IPR001611|IPR025875|IPR011009|IPR013320|IPR003591	GO:0005515|GO:0016772
Dr01571	Protein kinase domain|Leucine-rich repeat|Leucine-rich repeat-containing N-terminal, type 2|Leucine rich repeat 4|Protein kinase-like domain|Serine/threonine- / dual specificity protein kinase, catalytic domain|Leucine-rich repeat, typical subtype|Protein kinase, ATP binding site|Serine/threonine-protein kinase, active site	GO:0044763|GO:0016772|GO:0043231|GO:0050896|GO:0044444|GO:0008152		probable lrr receptor-like serine threonine-protein kinase at3g47570-like	IPR000719|IPR001611|IPR013210|IPR025875|IPR011009|IPR002290|IPR003591|IPR017441|IPR008271	GO:0004672|GO:0005524|GO:0006468|GO:0005515|GO:0016772|GO:0004674
Dr01572
Dr01573
Dr01574	Glycoside hydrolase family 20, catalytic core|Glycoside hydrolase, superfamily|Glycoside hydrolase, catalytic domain	GO:0005618|GO:0015929|GO:0005975		beta-hexosaminidase subunit b2-like	IPR015883|IPR017853|IPR013781	GO:0004553|GO:0005975|GO:0003824	EC:3.2.1.52	KEGG: 00511+3.2.1.52|KEGG: 00513+3.2.1.52|KEGG: 00520+3.2.1.52|KEGG: 00531+3.2.1.52|KEGG: 00603+3.2.1.52|KEGG: 00604+3.2.1.52|MetaCyc: PWY-6573|MetaCyc: PWY-6576|MetaCyc: PWY-6902
Dr01575
Dr01576	Proteasome, subunit alpha/beta|Proteasome A-type subunit	GO:0004175|GO:0005839|GO:0051603		multicatalytic endopeptidase complex	IPR001353|IPR023332	GO:0004298|GO:0005839|GO:0051603		Reactome: REACT_11045|Reactome: REACT_13|Reactome: REACT_13635|Reactome: REACT_152|Reactome: REACT_1538|Reactome: REACT_383|Reactome: REACT_578|Reactome: REACT_6185|Reactome: REACT_6850
Dr01577	DNA/RNA helicase, DEAD/DEAH box type, N-terminal|Helicase, C-terminal|P-loop containing nucleoside triphosphate hydrolase|Helicase, superfamily 1/2, ATP-binding domain|RNA helicase, DEAD-box type, Q motif|RNA helicase, ATP-dependent, DEAD-box, conserved site	GO:0003723|GO:0006364|GO:0008026|GO:0005524|GO:0000184|GO:0005634		dead-box atp-dependent rna helicase	IPR011545|IPR001650|IPR027417|IPR014001|IPR014014|IPR000629	GO:0003676|GO:0005524|GO:0008026|GO:0004386
Dr01578	Zinc finger, GATA-type|Zinc finger, NHR/GATA-type				IPR000679|IPR013088	GO:0003700|GO:0006355|GO:0008270|GO:0043565
Dr01579	Histone deacetylase superfamily|Histone deacetylase domain	GO:0016787|GO:0009536		histone deacetylase 2	IPR000286|IPR023801
Dr01580	ATPase, F1/V1/A1 complex, alpha/beta subunit, nucleotide-binding domain|ATPase, F1/V1/A1 complex, alpha/beta subunit, C-terminal|ATPase, F1 complex alpha/beta subunit, N-terminal domain|P-loop containing nucleoside triphosphate hydrolase|ATPase, V1 complex, subunit B|ATPase, alpha/beta subunit, nucleotide-binding domain, active site|V-type ATP synthase regulatory subunit B/beta	GO:0009941|GO:0006754|GO:0005524|GO:0016820|GO:0015991|GO:0005773|GO:0033180|GO:0005886	EC:3.6.3.0	v-type proton atpase subunit b2	IPR000194|IPR000793|IPR004100|IPR027417|IPR005723|IPR020003|IPR022879	GO:0005524|GO:0015991|GO:0016820|GO:0033178|GO:0015992|GO:0046034|GO:0033180	EC:3.6.3.14	KEGG: 00190+3.6.3.14|KEGG: 00195+3.6.3.14|MetaCyc: PWY-7219
Dr01581	Nonaspanin (TM9SF)|Major facilitator superfamily domain, general substrate transporter	GO:0006882|GO:0006878|GO:0005794|GO:0005886|GO:0016021|GO:0005634|GO:0005739		endosomal p24a protein	IPR004240|IPR016196	GO:0016021
Dr01582	SWR1-complex protein 4/DNA methyltransferase 1-associated protein 1|DNA methyltransferase 1-associated 1|Homeodomain-like|SANT/Myb domain	GO:0043967|GO:0006281|GO:0043968|GO:0003677|GO:0035267|GO:0016740|GO:0045892|GO:0003682|GO:0006338|GO:0000785		dna methyltransferase 1-associated protein 1	IPR027109|IPR008468|IPR009057|IPR001005	GO:0006281|GO:0006338|GO:0035267|GO:0043967|GO:0043968|GO:0005634|GO:0045892|GO:0003677|GO:0003682
Dr01583	Amine oxidase				IPR002937	GO:0016491|GO:0055114
Dr01584	Amine oxidase	GO:0055114|GO:0016491		probable polyamine oxidase 5-like	IPR002937	GO:0016491|GO:0055114
Dr01585
Dr01586	Late embryogenesis abundant protein, LEA-14				IPR004864
Dr01587	ATPase, AAA-type, core|Peptidase M41|P-loop containing nucleoside triphosphate hydrolase|AAA+ ATPase domain|Peptidase, FtsH|ATPase, AAA-type, conserved site	GO:0046872|GO:0004222|GO:0030163|GO:0005524|GO:0008568|GO:0006508|GO:0016020|GO:0009536|GO:0005739	EC:3.4.24.0|EC:3.6.4.3	atp-dependent zinc metalloprotease ftsh mitochondrial-like	IPR003959|IPR000642|IPR027417|IPR003593|IPR005936|IPR003960	GO:0005524|GO:0004222|GO:0006508|GO:0000166|GO:0017111|GO:0016020
Dr01588	WD40 repeat|Histone-binding protein RBBP4, N-terminal|WD40-repeat-containing domain|WD40/YVTN repeat-like-containing domain	GO:0000902|GO:0016746|GO:0048513|GO:0005634		nucleosome chromatin assembly factor group	IPR001680|IPR022052|IPR017986|IPR015943	GO:0005515
Dr01589	Mitochondrial substrate/solute carrier|Mitochondrial carrier protein|Mitochondrial carrier domain				IPR018108|IPR023395|IPR002067	GO:0055085
Dr01590	Zinc/iron permease|Zinc finger, CCHC-type|Zinc/iron permease, fungal/plant	GO:0022890|GO:0034220|GO:0046915|GO:0016020|GO:0000041		zip family metal transporter	IPR003689|IPR001878|IPR004698	GO:0016020|GO:0030001|GO:0046873|GO:0055085|GO:0003676|GO:0008270|GO:0005385|GO:0016021|GO:0071577
Dr01591	Serine-threonine/tyrosine-protein kinase catalytic domain|Protein kinase-like domain|Concanavalin A-like lectin/glucanase, subgroup|Protein kinase domain|Protein kinase, ATP binding site|Serine/threonine-protein kinase, active site	GO:0016301|GO:0009536|GO:0005739		receptor-like serine threonine-protein kinase ale2-like	IPR001245|IPR011009|IPR013320|IPR000719|IPR017441|IPR008271	GO:0004672|GO:0006468|GO:0016772|GO:0005524|GO:0004674
Dr01592	Zinc finger, double-stranded RNA binding|Zinc finger C2H2-type/integrase DNA-binding domain|Zinc finger, C2H2-like|Zinc finger, C2H2	GO:2000026|GO:0044763|GO:0003676|GO:0005622|GO:0009888|GO:0050794|GO:0048513|GO:0008270|GO:0044767		zinc finger protein	IPR022755|IPR013087|IPR015880|IPR007087	GO:0003676|GO:0046872
Dr01593	Heat shock transcription factor family|Heat shock transcription factor, plant|Heat shock factor (HSF)-type, DNA-binding|Winged helix-turn-helix DNA-binding domain	GO:0044238|GO:0044260|GO:0009628|GO:0042221|GO:0006950		heat shock transcription factor a2	IPR027725|IPR027709|IPR000232|IPR011991	GO:0003700|GO:0005634|GO:0009408|GO:0006355|GO:0043565
Dr01594	IQ motif, EF-hand binding site				IPR000048	GO:0005515
Dr01595	Tryptophan synthase beta subunit-like PLP-dependent enzymes superfamily	GO:0004124|GO:0006535|GO:0009333	EC:2.5.1.47	cysteine synthase	IPR001926
Dr01596	Protein kinase domain|Protein kinase-like domain|Serine/threonine- / dual specificity protein kinase, catalytic domain|Protein kinase, ATP binding site|Serine/threonine-protein kinase, active site	GO:0005737|GO:0009506|GO:0005886|GO:0006468|GO:0005524|GO:0005634|GO:0004674|GO:0009069	EC:2.7.11.0	casein kinase i isoform delta-like	IPR000719|IPR011009|IPR002290|IPR017441|IPR008271	GO:0004672|GO:0005524|GO:0006468|GO:0016772|GO:0004674
Dr01597	Sterol O-acyltransferase, ACAT/DAG/ARE types|Membrane bound O-acyl transferase, MBOAT	GO:0050896|GO:0043231|GO:2000026|GO:0016746|GO:0044444|GO:0008152|GO:0016020		diacylglycerol acyltransferase	IPR014371|IPR004299	GO:0008374
Dr01598	Domain of unknown function DUF239|Domain of unknown function DUF4409				IPR004314|IPR025521
Dr01599	Protein phosphatase 2A, regulatory subunit PR55|WD40-repeat-containing domain|WD40/YVTN repeat-like-containing domain|WD40 repeat|WD40 repeat, conserved site|Protein phosphatase 2A, regulatory subunit PR55, conserved site	GO:0000159|GO:0007165|GO:0008601		serine threonine protein phosphatase 2a 55 kda regulatory subunit b beta isoform-like	IPR000009|IPR017986|IPR015943|IPR001680|IPR019775|IPR018067	GO:0000159|GO:0007165|GO:0008601|GO:0005515
Dr01600	Mpv17/PMP22	GO:0016021|GO:0005778		peroxisomal membrane protein pmp22	IPR007248	GO:0016021
Dr01601	Hyaluronan/mRNA-binding protein	GO:0005739		plasminogen activator inhibitor 1 rna-binding protein	IPR006861
Dr01602	SANT/Myb domain|Homeodomain-like|Myb domain, plants|Zinc finger, CCHC-type|Myb domain	GO:0003682|GO:0003677|GO:0000785		mcb2 protein	IPR001005|IPR009057|IPR006447|IPR001878|IPR017930	GO:0003682|GO:0003677|GO:0003676|GO:0008270
Dr01603	Cation/H+ exchanger	GO:0015299|GO:0055085|GO:0006812|GO:0016021|GO:0005739|GO:0006885		potassium efflux antiporter	IPR006153	GO:0006812|GO:0015299|GO:0016021|GO:0055085
Dr01604	Inositol oxygenase	GO:0055114|GO:0050113|GO:0019310|GO:0019853|GO:0006949|GO:0005737|GO:0005506	EC:1.13.99.1	myo-inositol oxygenase	IPR007828	GO:0005506|GO:0005737|GO:0019310|GO:0050113|GO:0055114	EC:1.13.99.1	KEGG: 00053+1.13.99.1|KEGG: 00562+1.13.99.1|MetaCyc: PWY-4841|UniPathway: UPA00111
Dr01605	Zinc finger, CCCH-type	GO:0003676|GO:0044464		ccch-type zinc finger protein	IPR000571	GO:0046872
Dr01606	Target SNARE coiled-coil domain	GO:0044464|GO:0006886|GO:0016020		syntaxin-71	IPR000727	GO:0005515
Dr01607	SANT/Myb domain|Homeodomain-like|Myb domain	GO:0003677|GO:0003682|GO:0000785		protein	IPR001005|IPR009057|IPR017930	GO:0003682|GO:0003677
Dr01608
Dr01609	DNA repair protein RadA|P-loop containing nucleoside triphosphate hydrolase|Ribosomal protein S5 domain 2-type fold|Ribosomal protein S5 domain 2-type fold, subgroup|AAA+ ATPase domain	GO:0005524|GO:0003684|GO:0009536|GO:0006281		dna repair protein homolog	IPR027417|IPR020568|IPR014721|IPR004504|IPR003593	GO:0003684|GO:0005524|GO:0006281|GO:0000166|GO:0017111
Dr01610	Phosphofructokinase domain|Phosphofructokinase|Pyrophosphate-dependent phosphofructokinase TP0108	GO:0006002|GO:0005886|GO:0016310|GO:0003872|GO:0005945|GO:0047334|GO:0005524|GO:0006096|GO:0006000|GO:0006012|GO:0006013|GO:0006094|GO:0006098	EC:2.7.1.11|EC:2.7.1.90	6-phosphofructokinase 3-like	IPR000023|IPR022953|IPR012004	GO:0003872|GO:0005945|GO:0006096|GO:0006002|GO:0005524	EC:2.7.1.11	KEGG: 00010+2.7.1.11|KEGG: 00030+2.7.1.11|KEGG: 00051+2.7.1.11|KEGG: 00052+2.7.1.11|KEGG: 00680+2.7.1.11|MetaCyc: PWY-1042|MetaCyc: PWY-1861|MetaCyc: PWY-5484|Reactome: REACT_474|UniPathway: UPA00109|KEGG: 00010+2.7.1.11|KEGG: 00030+2.7.1.11|KEGG: 00051+2.7.1.11|KEGG: 00052+2.7.1.11|KEGG: 00680+2.7.1.11|MetaCyc: PWY-1042|MetaCyc: PWY-1861|MetaCyc: PWY-5484|UniPathway: UPA00109
Dr01611	Peptidase M16, N-terminal|Metalloenzyme, LuxS/M16 peptidase-like|Peptidase M16 domain	GO:0044429|GO:0016020		mitochondrial processing peptidase alpha subunit	IPR011765|IPR011249|IPR011237	GO:0003824|GO:0046872
Dr01612	Kae1/YgjD family|Gcp-like domain	GO:0008233|GO:0006508		glycoprotease m22 family protein	IPR017861|IPR000905		EC:2.3.1.-	KEGG: 00061+2.3.1.-|KEGG: 00253+2.3.1.-|KEGG: 00310+2.3.1.-|KEGG: 00330+2.3.1.-|KEGG: 00340+2.3.1.-|KEGG: 00350+2.3.1.-|KEGG: 00360+2.3.1.-|KEGG: 00362+2.3.1.-|KEGG: 00540+2.3.1.-|KEGG: 00564+2.3.1.-|KEGG: 00565+2.3.1.-|KEGG: 00604+2.3.1.-|KEGG: 00623+2.3.1.-|KEGG: 00626+2.3.1.-|KEGG: 00627+2.3.1.-|KEGG: 00642+2.3.1.-|KEGG: 00650+2.3.1.-|KEGG: 00680+2.3.1.-|KEGG: 00903+2.3.1.-|KEGG: 00904+2.3.1.-…
Dr01613	NAC domain	GO:0016023		nac domain ipr003441	IPR003441	GO:0003677|GO:0006355
Dr01614	Acid phosphatase (Class B)|HAD-like domain|Acid phosphatase, plant|Vegetative storage protein/acid phosphatase	GO:0016023|GO:0016787		stem 28 kda glycoprotein precursor	IPR005519|IPR023214|IPR010028|IPR014403	GO:0003993
Dr01615	Acid phosphatase (Class B)|HAD-like domain|Acid phosphatase, plant|Vegetative storage protein/acid phosphatase	GO:0016023|GO:0016787		stem 28 kda glycoprotein precursor	IPR005519|IPR023214|IPR010028|IPR014403	GO:0003993
Dr01616	Leucine-rich repeat|Leucine-rich repeat-containing N-terminal, type 2	GO:0016491|GO:0016023|GO:0008152		leucine-rich repeat receptor protein kinase exs	IPR001611|IPR013210	GO:0005515
Dr01617	Protein of unknown function DUF668|Protein of unknown function DUF3475	GO:0044464		protein	IPR007700|IPR021864
Dr01618	Amidase|Amidase signature domain	GO:0016023|GO:0003824		protein	IPR000120|IPR023631	GO:0016884	EC:6.3.5.-	KEGG: 00253+6.3.5.-
Dr01619	Ribosomal RNA large subunit methyltransferase F-like|S-adenosyl-L-methionine dependent methyltransferase, Mett10D, predicted	GO:0009648|GO:0016740|GO:0005739		ribosomal rna large subunit methyltransferase f	IPR010286|IPR017182	GO:0008168	EC:2.1.1.-	KEGG: 00130+2.1.1.-|KEGG: 00253+2.1.1.-|KEGG: 00270+2.1.1.-|KEGG: 00340+2.1.1.-|KEGG: 00350+2.1.1.-|KEGG: 00360+2.1.1.-|KEGG: 00380+2.1.1.-|KEGG: 00450+2.1.1.-|KEGG: 00522+2.1.1.-|KEGG: 00624+2.1.1.-|KEGG: 00627+2.1.1.-|KEGG: 00860+2.1.1.-|KEGG: 00940+2.1.1.-|KEGG: 00941+2.1.1.-|KEGG: 00942+2.1.1.-|KEGG: 00945+2.1.1.-|KEGG: 00950+2.1.1.-|KEGG: 00981+2.1.1.-
Dr01620
Dr01621	AP endonuclease 1|Endonuclease/exonuclease/phosphatase|Zinc finger, GRF-type	GO:0005488|GO:0004518|GO:0090304		dna-(apurinic or apyrimidinic site) lyase 2-like	IPR004808|IPR005135|IPR010666	GO:0004518|GO:0006281|GO:0008270
Dr01622
Dr01623	Sec7 domain|Domain of unknown function DUF1981, Sec7 associated|Armadillo-type fold|Sec7 domain, alpha orthogonal bundle|Armadillo-like helical	GO:0005086|GO:0032012|GO:0043087		brefeldin a-inhibited guanine nucleotide-exchange protein 1-like	IPR000904|IPR015403|IPR016024|IPR023394|IPR011989	GO:0005086|GO:0032012|GO:0005488
Dr01624	DnaJ domain				IPR001623
Dr01625	Armadillo-type fold|Armadillo-like helical|Armadillo	GO:0044763|GO:0016043|GO:0044424		protein	IPR016024|IPR011989|IPR000225	GO:0005488|GO:0005515
Dr01626	Cold-shock protein, DNA-binding|Nucleic acid-binding, OB-fold|Cold shock protein|Cold-shock conserved site	GO:0051603|GO:0008236|GO:0032508|GO:0008270|GO:0010363|GO:0005773|GO:0006465|GO:0006355|GO:0009651|GO:0004298|GO:0005839|GO:0016021|GO:0003697|GO:0005730|GO:0010043|GO:0010228|GO:0009409|GO:0003690|GO:0009534|GO:0005886|GO:0048316|GO:0048443|GO:0003729	EC:3.4.25.0	glycine-rich protein 2	IPR002059|IPR012340|IPR011129|IPR019844	GO:0003677|GO:0006355|GO:0003676
Dr01627	Thaumatin				IPR001938
Dr01628
Dr01629	Heat shock protein Hsp90 family|Heat shock protein Hsp90, N-terminal|Histidine kinase-like ATPase, ATP-binding domain|Heat shock protein Hsp90, conserved site	GO:0042742|GO:0006457|GO:0005886|GO:0005618|GO:0046685|GO:0005524|GO:0051082|GO:0005829|GO:0009408		heat shock	IPR001404|IPR003594|IPR020575|IPR019805	GO:0005524|GO:0006457|GO:0006950|GO:0051082
Dr01630
Dr01631	Thaumatin	GO:0016023|GO:0009682|GO:0009723		thaumatin-like protein	IPR001938
Dr01632	Nicotinamide N-methyltransferase-like	GO:0009536		s-adenosyl-l-methionine-dependent methyltransferase domain-containing protein	IPR019410
Dr01633	Acyl-CoA-binding protein, ACBP|FERM/acyl-CoA-binding protein, 3-helical bundle	GO:0016023		acyl binding expressed	IPR000582|IPR014352	GO:0000062
Dr01634	Nodulin-like|Major facilitator superfamily domain, general substrate transporter				IPR010658|IPR016196
Dr01635	Major facilitator superfamily domain, general substrate transporter	GO:0080167|GO:0016020|GO:0005739		protein	IPR016196
Dr01636	Nodulin-like|Major facilitator superfamily domain, general substrate transporter	GO:0016020|GO:0005739		protein	IPR010658|IPR016196
Dr01637
Dr01638	Zinc finger, SWIM-type|MULE transposase domain|Zinc finger, PMZ-type				IPR007527|IPR018289|IPR006564	GO:0008270
Dr01639
Dr01640	Ferredoxin--NADP reductase|Oxidoreductase FAD/NAD(P)-binding|Riboflavin synthase-like beta-barrel|Ferredoxin reductase-type FAD-binding domain	GO:0005488|GO:0016491|GO:0044237|GO:0009536|GO:0055114		ferredoxin--nadp+ reductase	IPR015701|IPR001433|IPR017938|IPR017927	GO:0016491|GO:0055114	EC:1.18.1.2	KEGG: 00195+1.18.1.2|MetaCyc: PWY-101|MetaCyc: PWY-7230
Dr01641	HAT dimerisation domain, C-terminal|Ribonuclease H-like domain	GO:0005488		hat family dimerisation domain containing protein	IPR008906|IPR012337	GO:0046983|GO:0003676
Dr01642	Ferredoxin--NADP reductase|Oxidoreductase FAD/NAD(P)-binding|Riboflavin synthase-like beta-barrel|Ferredoxin reductase-type FAD-binding domain	GO:0005488|GO:0016491|GO:0044237|GO:0009536|GO:0055114		ferredoxin--nadp+ reductase	IPR015701|IPR001433|IPR017938|IPR017927	GO:0016491|GO:0055114	EC:1.18.1.2	KEGG: 00195+1.18.1.2|MetaCyc: PWY-101|MetaCyc: PWY-7230
Dr01643	Protein of unknown function DUF284, transmembrane eukaryotic|Probable transposase, Ptta/En/Spm, plant	GO:0016020|GO:0003723|GO:0006396|GO:0051301		cell division control	IPR005045|IPR004252	GO:0016020
Dr01644	Aminotransferase-like, plant mobile domain				IPR019557
Dr01645	Tetrahydrofolate dehydrogenase/cyclohydrolase, catalytic domain|Tetrahydrofolate dehydrogenase/cyclohydrolase, NAD(P)-binding domain|Tetrahydrofolate dehydrogenase/cyclohydrolase|NAD(P)-binding domain|Tetrahydrofolate dehydrogenase/cyclohydrolase, conserved site	GO:0055114|GO:0004488|GO:0009396|GO:0004477|GO:0000166|GO:0009507|GO:0046487	EC:1.5.1.5|EC:3.5.4.9	amino acid dehydrogenase family protein	IPR020630|IPR020631|IPR016040|IPR000672|IPR020867	GO:0003824|GO:0004488|GO:0009396|GO:0055114	EC:1.5.1.5+3.5.4.9	KEGG: 00670+1.5.1.5+3.5.4.9|KEGG: 00720+1.5.1.5+3.5.4.9|MetaCyc: PWY-1722|MetaCyc: PWY-2201|MetaCyc: PWY-3841|MetaCyc: PWY-5030|MetaCyc: PWY-5497|MetaCyc: PWY-6613|UniPathway: UPA00193
Dr01646	Peptidase S26B, eukaryotic signal peptidase|Peptidase S24/S26A/S26B|Peptidase S24/S26A/S26B/S26C|Peptidase S24/S26, beta-ribbon domain	GO:0008233|GO:0005886|GO:0006465|GO:0016021|GO:0006508|GO:0005787		signal endoplasmic reticulum-type	IPR001733|IPR019759|IPR015927|IPR028360	GO:0006465|GO:0008233|GO:0016020
Dr01647
Dr01648
Dr01649
Dr01650	Myb/SANT-like domain				IPR024752
Dr01651	Cytochrome P450|Cytochrome P450, E-class, group I|Cytochrome P450, conserved site	GO:0005488|GO:0016491|GO:0016023		cytochrome p450 94a1-like	IPR001128|IPR002401|IPR017972	GO:0005506|GO:0016705|GO:0020037|GO:0055114		Reactome: REACT_13433
Dr01652	Protein kinase domain|Leucine-rich repeat-containing N-terminal, type 2|Protein kinase-like domain|Serine/threonine- / dual specificity protein kinase, catalytic domain|Leucine-rich repeat, typical subtype|Leucine-rich repeat|Serine/threonine-protein kinase, active site	GO:0016020|GO:0048833|GO:0004713|GO:0006468|GO:0004674|GO:0007165|GO:0048437|GO:0005524|GO:0010080|GO:0009069	EC:2.7.10.0|EC:2.7.11.0	receptor protein kinase clavata1	IPR000719|IPR013210|IPR011009|IPR002290|IPR003591|IPR001611|IPR008271	GO:0004672|GO:0005524|GO:0006468|GO:0016772|GO:0005515|GO:0004674
Dr01653	Transferase|Chloramphenicol acetyltransferase-like domain	GO:0016747	EC:2.3.1.0	bahd family clade v	IPR003480|IPR023213	GO:0016747
Dr01654
Dr01655	Senescence/spartin-associated	GO:0006950|GO:0009628		erd7 protein	IPR009686
Dr01656	Signal transduction response regulator, receiver domain|Signal transduction histidine kinase EnvZ-like, dimerisation/phosphoacceptor domain|Histidine kinase-like ATPase, ATP-binding domain|Cache domain|Signal transduction histidine kinase-related protein, C-terminal|Signal transduction histidine kinase, homodimeric domain|CheY-like superfamily|Signal transduction histidine kinase, core	GO:0004673|GO:0009628|GO:0097159|GO:0043167|GO:0016310|GO:0007165|GO:1901363|GO:0038023|GO:0006950|GO:0009365	EC:2.7.13.3	histidine kinase osmosensor protein	IPR001789|IPR003661|IPR003594|IPR004010|IPR009082|IPR011006|IPR004358|IPR005467	GO:0000156|GO:0000160|GO:0006355|GO:0000155|GO:0007165|GO:0016020|GO:0005524|GO:0004871|GO:0016310|GO:0016772		Reactome: REACT_14797|Reactome: REACT_1046
Dr01657	Proteasome, alpha-subunit, N-terminal domain|Proteasome A-type subunit	GO:0009524|GO:0022626|GO:0005773|GO:0019773|GO:0005886|GO:0006511|GO:0005819|GO:0009507|GO:0005634|GO:0004298	EC:3.4.25.0	proteasome subunit alpha type 7	IPR000426|IPR023332	GO:0004175|GO:0006511|GO:0019773|GO:0004298		Reactome: REACT_11045|Reactome: REACT_13|Reactome: REACT_13635|Reactome: REACT_152|Reactome: REACT_1538|Reactome: REACT_383|Reactome: REACT_578|Reactome: REACT_6185|Reactome: REACT_6850
Dr01658	Proteasome, subunit alpha/beta|Proteasome A-type subunit	GO:0009524|GO:0022626|GO:0005773|GO:0019773|GO:0005886|GO:0006511|GO:0005819|GO:0009507|GO:0005634|GO:0004298	EC:3.4.25.0	proteasome subunit alpha type 7	IPR001353|IPR023332	GO:0004298|GO:0005839|GO:0051603		Reactome: REACT_11045|Reactome: REACT_13|Reactome: REACT_13635|Reactome: REACT_152|Reactome: REACT_1538|Reactome: REACT_383|Reactome: REACT_578|Reactome: REACT_6185|Reactome: REACT_6850
Dr01659	SANT/Myb domain|Homeodomain-like|Myb domain	GO:0050896|GO:0005488		myb transcription factor	IPR001005|IPR009057|IPR017930	GO:0003682|GO:0003677
Dr01660	Domain of unknown function DUF632|Domain of unknown function DUF630				IPR006867|IPR006868
Dr01661	C2 domain	GO:0001778|GO:0005768|GO:0005773|GO:0009409|GO:0016023|GO:0005886|GO:0046740|GO:0032456|GO:0009615|GO:0006897		calcium lipid binding	IPR000008	GO:0005515
Dr01662	Small GTPase superfamily|P-loop containing nucleoside triphosphate hydrolase|Small GTPase superfamily, Ras type|Small GTPase superfamily, Rho type|Small GTPase superfamily, Rab type|Small GTP-binding protein domain	GO:0030834|GO:0030427|GO:0000226|GO:0017157|GO:0010119|GO:0051650|GO:0032794|GO:0009734|GO:0005525|GO:0009524|GO:0006184|GO:0004767|GO:0030833|GO:0005730|GO:0005819|GO:0007264|GO:0009416|GO:0045177|GO:0003924|GO:0005886|GO:0009860|GO:0006687	EC:3.1.4.12	rac-like gtp-binding protein 6	IPR001806|IPR027417|IPR020849|IPR003578|IPR003579|IPR005225	GO:0005525|GO:0007264|GO:0003924|GO:0006184|GO:0007165|GO:0016020|GO:0005622|GO:0015031		Reactome: REACT_11044
Dr01663	Basic-leucine zipper domain				IPR004827	GO:0003700|GO:0006355|GO:0043565
Dr01664	WD40 repeat|G-protein beta WD-40 repeat|WD40-repeat-containing domain|WD40/YVTN repeat-like-containing domain|WD40 repeat, conserved site				IPR001680|IPR017986|IPR015943|IPR020472|IPR019775	GO:0005515
Dr01665
Dr01666	Peptidase S8, subtilisin-related|Peptidase S8/S53 domain|Protease-associated domain, PA|Proteinase inhibitor I9|Peptidase S8, subtilisin, Ser-active site	GO:0008233|GO:0016023|GO:0008152		subtilisin-like protease-like	IPR015500|IPR000209|IPR003137|IPR010259|IPR023828	GO:0004252|GO:0006508|GO:0042802|GO:0043086
Dr01667
Dr01668	Peptidase S8, subtilisin-related|Peptidase S8/S53 domain|Proteinase inhibitor I9|Peptidase S8, subtilisin, Ser-active site	GO:0008233|GO:0016023		subtilisin-like protease-like	IPR015500|IPR000209|IPR010259|IPR023828	GO:0004252|GO:0006508|GO:0042802|GO:0043086
Dr01669	Peptidase S8, subtilisin-related|Peptidase S8/S53 domain|Protease-associated domain, PA|Proteinase inhibitor I9|Peptidase S8, subtilisin, Ser-active site	GO:0008233|GO:0016023		subtilisin-like protease-like	IPR015500|IPR000209|IPR003137|IPR010259|IPR023828	GO:0004252|GO:0006508|GO:0042802|GO:0043086
Dr01670	Probable transposase, Ptta/En/Spm, plant				IPR004252
Dr01671	SKP1 component|SKP1 component, dimerisation|SKP1 component, POZ domain|BTB/POZ fold|E3 ubiquitin ligase, SCF complex, Skp subunit	GO:0044424		s-phase kinase-associated protein 1	IPR001232|IPR016072|IPR016073|IPR011333|IPR016897	GO:0006511		Reactome: REACT_6185|UniPathway: UPA00143|UniPathway: UPA00143
Dr01672
Dr01673
Dr01674	UDP-glucuronosyl/UDP-glucosyltransferase	GO:0016757		protein	IPR002213	GO:0008152|GO:0016758
Dr01675	SKP1 component|SKP1 component, POZ domain|BTB/POZ fold				IPR001232|IPR016073|IPR011333	GO:0006511		Reactome: REACT_6185|UniPathway: UPA00143
Dr01676	CobW/HypB/UreG domain				IPR003495
Dr01677	SKP1 component|SKP1 component, dimerisation|SKP1 component, POZ domain|BTB/POZ fold|E3 ubiquitin ligase, SCF complex, Skp subunit				IPR001232|IPR016072|IPR016073|IPR011333|IPR016897	GO:0006511		Reactome: REACT_6185|UniPathway: UPA00143|UniPathway: UPA00143
Dr01678
Dr01679	SKP1 component|SKP1 component, dimerisation|SKP1 component, POZ domain|BTB/POZ fold|E3 ubiquitin ligase, SCF complex, Skp subunit				IPR001232|IPR016072|IPR016073|IPR011333|IPR016897	GO:0006511		Reactome: REACT_6185|UniPathway: UPA00143|UniPathway: UPA00143
Dr01680	Probable transposase, Ptta/En/Spm, plant				IPR004252
Dr01681
Dr01682	Replication factor A, C-terminal|Nucleic acid-binding, OB-fold				IPR013955|IPR012340
Dr01683	Cytokinin riboside 5'-monophosphate phosphoribohydrolase LOG	GO:0005829|GO:0016799|GO:0010074|GO:0009691|GO:0005634	EC:3.2.2.0	protein	IPR005269
Dr01684	Uncharacterised protein family Cys-rich	GO:0005887|GO:0070509|GO:0007638|GO:0048528		plac8 domain-containing protein	IPR006461
Dr01685	F-box domain				IPR001810	GO:0005515
Dr01686	Mediator complex, subunit Med4				IPR019258	GO:0001104|GO:0006357|GO:0016592
Dr01687
Dr01688	WD40 repeat|Histone-binding protein RBBP4, N-terminal|G-protein beta WD-40 repeat|WD40-repeat-containing domain|WD40/YVTN repeat-like-containing domain|WD40 repeat, conserved site	GO:0010467|GO:0016740|GO:0006259|GO:0050789|GO:0016568|GO:0048316		nucleosome chromatin assembly factor group	IPR001680|IPR022052|IPR017986|IPR015943|IPR020472|IPR019775	GO:0005515
Dr01689
Dr01690
Dr01691	Myc-type, basic helix-loop-helix (bHLH) domain				IPR011598	GO:0046983
Dr01692	Sedlin|Longin-like domain	GO:0006888|GO:0009536		trafficking protein particle complex subunit 2-like protein	IPR006722|IPR011012	GO:0005622|GO:0006888|GO:0006810
Dr01693
Dr01694	Haem peroxidase, plant/fungal/bacterial|Plant peroxidase|Haem peroxidase|Peroxidases heam-ligand binding site	GO:0020037|GO:0046872|GO:0009505|GO:0004601|GO:0055114|GO:0006979|GO:0006804	EC:1.11.1.7	peroxidase	IPR002016|IPR010255|IPR000823|IPR019793	GO:0004601|GO:0006979|GO:0020037|GO:0055114	EC:1.11.1.7	KEGG: 00360+1.11.1.7|KEGG: 00940+1.11.1.7|MetaCyc: PWY-5461|MetaCyc: PWY-7214
Dr01695	Protein of unknown function DUF677	GO:0016020		protein	IPR007749
Dr01696	Expansin|Expansin, cellulose-binding-like domain|RlpA-like double-psi beta-barrel domain|Expansin/Lol pI|Barwin-like endoglucanase|Expansin/pollen allergen, DPBB domain	GO:0005576|GO:0016020|GO:0009664|GO:0016023|GO:0005618		alpha-expansin 11	IPR002963|IPR007117|IPR009009|IPR014733|IPR007118|IPR007112	GO:0009664|GO:0005576
Dr01697	Proteasome component (PCI) domain|26S proteasome regulatory subunit, C-terminal|Winged helix-turn-helix DNA-binding domain|PCI/PINT associated module	GO:0042176|GO:0005886|GO:0030234|GO:0000502|GO:0050790|GO:0005634|GO:0009536		26s proteasome non-atpase regulatory subunit 3	IPR000717|IPR013586|IPR011991|IPR013143	GO:0005515|GO:0000502|GO:0030234|GO:0042176
Dr01698	Multi antimicrobial extrusion protein				IPR002528	GO:0006855|GO:0015238|GO:0015297|GO:0016020|GO:0055085		Reactome: REACT_15518|Reactome: REACT_20633
Dr01699
Dr01700
Dr01701
Dr01702	Hydrophobic seed protein|Bifunctional inhibitor/plant lipid transfer protein/seed storage helical domain				IPR027923|IPR016140
Dr01703	Oxysterol-binding protein|Pleckstrin homology-like domain|Pleckstrin homology domain				IPR000648|IPR011993|IPR001849	GO:0005515|GO:0005543
Dr01704	Heat shock protein Hsp90 family|Histidine kinase-like ATPase, ATP-binding domain|Heat shock protein Hsp90, N-terminal|Heat shock protein Hsp90, conserved site	GO:0042742|GO:0006457|GO:0005886|GO:0005618|GO:0046685|GO:0005524|GO:0051082|GO:0005829|GO:0009408		heat shock protein 81-1	IPR001404|IPR003594|IPR020575|IPR019805	GO:0005524|GO:0006457|GO:0006950|GO:0051082
Dr01705	Protein of unknown function DUF639				IPR006927
Dr01706	Mitochondrial substrate/solute carrier|Mitochondrial carrier domain	GO:0006810		mitochondrial substrate carrier family protein	IPR018108|IPR023395
Dr01707		GO:0016020|GO:0009536		protein
Dr01708	BRO1 domain				IPR004328
Dr01709	Protein of unknown function DUF1308				IPR010733
Dr01710		GO:0005488		hypothetical protein OsI_00415 [Oryza sativa Indica Group]
Dr01711	Carbon-nitrogen hydrolase|Nitrilase/cyanide hydratase, conserved site	GO:0047427|GO:0080109|GO:0047558|GO:0009617|GO:0046686|GO:0005886|GO:0009970|GO:0051410|GO:0019499|GO:0009507|GO:0048046|GO:0080061|GO:0050898	EC:3.5.5.4|EC:4.2.1.65	nitrilase 4a	IPR003010|IPR000132	GO:0006807|GO:0016810
Dr01712
Dr01713	Carbon-nitrogen hydrolase	GO:0047427|GO:0080109|GO:0047558|GO:0009617|GO:0046686|GO:0005886|GO:0009970|GO:0051410|GO:0019499|GO:0009507|GO:0048046|GO:0080061|GO:0050898	EC:3.5.5.4|EC:4.2.1.65	nitrilase 1	IPR003010	GO:0006807|GO:0016810
Dr01714		GO:0072594|GO:0016482|GO:0043231|GO:0044444|GO:0006605|GO:0006996		coiled-coil-helix-coiled-coil-helix domain-containing protein 4
Dr01715	Leucine-rich repeat, cysteine-containing subtype	GO:0003676|GO:0008026|GO:0009536|GO:0016023|GO:0005524		glucose regulated repressor	IPR006553
Dr01716	Myosin head, motor domain|IQ motif, EF-hand binding site|P-loop containing nucleoside triphosphate hydrolase	GO:0009524|GO:0009504|GO:0005886|GO:0016459|GO:0005524|GO:0003774|GO:0005739		myosin-j heavy chain-like	IPR001609|IPR000048|IPR027417	GO:0003774|GO:0005524|GO:0016459|GO:0005515
Dr01717	Cyclin, N-terminal|Cyclin-like|Tubulin/FtsZ, 2-layer sandwich domain	GO:0044763		ccsds_arath ame: full=cyclin-sds ame: full=protein solo dancers	IPR006671|IPR013763|IPR018316	GO:0003924|GO:0005525|GO:0006184|GO:0043234|GO:0051258
Dr01718	Prefoldin alpha-like|Prefoldin|Prefoldin alpha subunit	GO:0006457|GO:0016272|GO:0051082		prefoldin subunit	IPR004127|IPR009053|IPR011599	GO:0006457|GO:0016272|GO:0051082
Dr01719	E2F-associated phosphoprotein				IPR019370
Dr01720	General substrate transporter|Sugar/inositol transporter|Major facilitator superfamily domain, general substrate transporter|Major facilitator superfamily domain|Sugar transporter, conserved site	GO:0016491|GO:0043231|GO:0005351|GO:0008643|GO:0016020		protein	IPR005828|IPR016196|IPR003663|IPR020846|IPR005829	GO:0016021|GO:0022857|GO:0055085|GO:0016020|GO:0022891|GO:0005215|GO:0006810		Reactome: REACT_15518
Dr01721	Major facilitator superfamily|Major facilitator superfamily domain, general substrate transporter|Major facilitator superfamily domain	GO:0016021|GO:0005886|GO:0055085		protein spinster homolog 1-like	IPR011701|IPR016196|IPR020846	GO:0016021|GO:0055085
Dr01722	tRNAHis guanylyltransferase Thg1|Thg1 C-terminal domain	GO:0006400|GO:0000287|GO:0008193		trnahis guanylyltransferase	IPR007537|IPR025845	GO:0000287|GO:0006400|GO:0008193
Dr01723	tRNAHis guanylyltransferase Thg1|tRNAHis guanylyltransferase catalytic domain	GO:0006400|GO:0000287|GO:0008193		trna guanylyltransferase	IPR007537|IPR024956	GO:0000287|GO:0006400|GO:0008193
Dr01724	Carbon-nitrogen hydrolase|Nitrilase/cyanide hydratase, conserved site	GO:0047427|GO:0080109|GO:0047558|GO:0009617|GO:0046686|GO:0005886|GO:0009970|GO:0051410|GO:0019499|GO:0009507|GO:0048046|GO:0080061|GO:0050898	EC:3.5.5.4|EC:4.2.1.65	nitrilase 2	IPR003010|IPR000132	GO:0006807|GO:0016810
Dr01725	Actin-related protein	GO:0005730|GO:0048574|GO:0048235		actin-related protein 4-like	IPR004000
Dr01726	mRNA splicing factor, thioredoxin-like U5 snRNP|Thioredoxin-like fold	GO:0003676|GO:0005681|GO:0007067|GO:0009536		thioredoxin-like 4a	IPR004123|IPR012336	GO:0005681|GO:0007067
Dr01727	Peptidase S10, serine carboxypeptidase|Peptidase S10, serine carboxypeptidase, active site	GO:0016020|GO:0016023|GO:0004180		serine carboxypeptidase-like 35-like	IPR001563|IPR018202	GO:0004185|GO:0006508
Dr01728	Cytochrome P450|Cytochrome P450, E-class, group I|Cytochrome P450, conserved site	GO:0010345|GO:0009055|GO:0005506|GO:0020037|GO:0042761|GO:0005783|GO:0070330|GO:0055114|GO:0006118	EC:1.14.14.1	cytochrome p450	IPR001128|IPR002401|IPR017972	GO:0005506|GO:0016705|GO:0020037|GO:0055114		Reactome: REACT_13433
Dr01729	HD domain|HD/PDEase domain	GO:0016787		metal-dependent phosphohydrolase	IPR006674|IPR003607	GO:0008081|GO:0046872|GO:0003824
Dr01730
Dr01731	Ribosomal protein L19|Translation protein SH3-like domain	GO:0005840|GO:0003735|GO:0006412|GO:0005739|GO:0042254		ribosomal protein l19 family protein	IPR001857|IPR008991	GO:0003735|GO:0005622|GO:0005840|GO:0006412
Dr01732
Dr01733	Cytokinin riboside 5'-monophosphate phosphoribohydrolase LOG				IPR005269
Dr01734	Protein of unknown function DUF3506	GO:0044424		protein executer chloroplastic-like	IPR021894
Dr01735	Glycoside hydrolase, family 9|Carbohydrate binding domain CBM49|Six-hairpin glycosidase-like|Six-hairpin glycosidase	GO:0004553|GO:0016023|GO:0000272	EC:3.2.1.0	endoglucanase 5-like	IPR001701|IPR019028|IPR008928|IPR012341	GO:0004553|GO:0005975|GO:0030246|GO:0003824	EC:3.2.1.4	KEGG: 00500+3.2.1.4|MetaCyc: PWY-6788|MetaCyc: PWY-6805
Dr01736	Zinc finger, RING/FYVE/PHD-type|Zinc finger, RING-type|Zinc finger, RING-type, conserved site				IPR013083|IPR001841|IPR017907	GO:0005515|GO:0008270
Dr01737	Expansin|Expansin, cellulose-binding-like domain				IPR002963|IPR007117	GO:0009664
Dr01738	Coiled-coil domain containing protein 109, C-terminal				IPR006769
Dr01739	Glycoside hydrolase family 3|Glycoside hydrolase, family 3, N-terminal|Glycoside hydrolase family 3 C-terminal domain|Glycoside hydrolase, superfamily	GO:0004553|GO:0044444|GO:0043231|GO:0071944|GO:0005975	EC:3.2.1.0	probable beta-d-xylosidase 6-like	IPR026892|IPR001764|IPR002772|IPR017853	GO:0004553|GO:0005975
Dr01740	WD40 repeat|WD40-repeat-containing domain|WD40/YVTN repeat-like-containing domain	GO:0016846		cirhin-like isoform 1	IPR001680|IPR017986|IPR015943	GO:0005515
Dr01741	ATPase, F0 complex, subunit D, mitochondrial	GO:0008270|GO:0022626|GO:0009651|GO:0015078|GO:0016787|GO:0005730|GO:0015986|GO:0009535|GO:0000276|GO:0005886|GO:0005507		atp synthase d mitochondrial	IPR008689	GO:0000276|GO:0015078|GO:0015986
Dr01742	Pentapeptide repeat	GO:0009535|GO:0009543|GO:0009570		thylakoid lumenal protein	IPR001646
Dr01743	Chromosome transmission fidelity protein 8				IPR018607
Dr01744	Ribosomal protein L13e|Ribosomal protein L13e, conserved site	GO:0005730|GO:0003735|GO:0005886|GO:0005618|GO:0022625|GO:0006412|GO:0042254		60s ribosomal protein l13-2	IPR001380|IPR018256	GO:0003735|GO:0005622|GO:0005840|GO:0006412
Dr01745	Stress responsive alpha-beta barrel|Dimeric alpha-beta barrel	GO:0009536		stress responsive alpha-beta barrel domain protein	IPR013097|IPR011008
Dr01746	Short-chain dehydrogenase/reductase SDR|Glucose/ribitol dehydrogenase|F-box domain|NAD(P)-binding domain	GO:0008152|GO:0050896|GO:0016616|GO:0071944	EC:1.1.1.0	(+)-neomenthol dehydrogenase-like	IPR002198|IPR001810|IPR016040|IPR002347	GO:0008152|GO:0016491|GO:0005515
Dr01747	Short-chain dehydrogenase/reductase SDR|Glucose/ribitol dehydrogenase|NAD(P)-binding domain	GO:0008152|GO:0050896|GO:0016616|GO:0071944	EC:1.1.1.0	(+)-neomenthol dehydrogenase	IPR002198|IPR016040|IPR002347	GO:0008152|GO:0016491
Dr01748	Short-chain dehydrogenase/reductase SDR|Glucose/ribitol dehydrogenase|NAD(P)-binding domain	GO:0008152|GO:0050896|GO:0016616|GO:0071944	EC:1.1.1.0	(+)-neomenthol dehydrogenase	IPR002198|IPR016040|IPR002347	GO:0008152|GO:0016491
Dr01749	Short-chain dehydrogenase/reductase SDR|NAD(P)-binding domain	GO:0016616	EC:1.1.1.0	(+)-neomenthol dehydrogenase	IPR002198|IPR016040	GO:0008152|GO:0016491
Dr01750	Short-chain dehydrogenase/reductase SDR|Glucose/ribitol dehydrogenase|NAD(P)-binding domain	GO:0050896|GO:0004672|GO:0016616|GO:0016023|GO:0071944|GO:0000166|GO:0008152|GO:0016020	EC:1.1.1.0	(+)-neomenthol dehydrogenase	IPR002198|IPR016040|IPR002347	GO:0008152|GO:0016491
Dr01751	Mlo-related protein	GO:0006952|GO:0009607		mlo-like protein 6-like	IPR004326	GO:0006952|GO:0016021
Dr01752	Cleavage/polyadenylation specificity factor subunit 5|NUDIX hydrolase domain-like	GO:0055085|GO:0003729|GO:0016021|GO:0030983|GO:0006813|GO:0006378|GO:0009536|GO:0005524|GO:0006298|GO:0005849|GO:0015299|GO:0016787|GO:0006885		cleavage and polyadenylation specificity factor 5	IPR016706|IPR015797	GO:0003729|GO:0005849|GO:0006378|GO:0016787
Dr01753	Zinc finger, LIM-type	GO:0051015|GO:0051017|GO:0008270		lim domain protein 2b	IPR001781	GO:0008270
Dr01754	SANT/Myb domain|Homeodomain-like|Myb domain	GO:0003677|GO:0003682|GO:0000785		transcription factor laf1-like	IPR001005|IPR009057|IPR017930	GO:0003682|GO:0003677
Dr01755	Peptidase S10, serine carboxypeptidase|Peptidase S10, serine carboxypeptidase, active site	GO:0004185|GO:0005789|GO:0005773|GO:0005777|GO:0016023|GO:0005576|GO:0006508	EC:3.4.16.0	serine carboxypeptidase iii precursor	IPR001563|IPR018202	GO:0004185|GO:0006508
Dr01756	Permease, cytosine/purines, uracil, thiamine, allantoin	GO:0016020		uracil transporter-like protein	IPR001248	GO:0015205|GO:0015851|GO:0016020
Dr01757	Protein of unknown function DUF2451, C-terminal|Vacuolar protein sorting-associated protein 54	GO:0016023		uncharacterized protein	IPR019514|IPR019515
Dr01758	ACT domain	GO:0008152|GO:0016597		protein	IPR002912	GO:0008152|GO:0016597
Dr01759	Rhodanese-like domain	GO:0004725|GO:0006468|GO:0046685|GO:0008794|GO:0009507|GO:0035335|GO:0005739|GO:0006570|GO:0006118	EC:3.1.3.48|EC:1.20.4.1	dual specificity phosphatase cdc25	IPR001763
Dr01760
Dr01761
Dr01762	Late embryogenesis abundant protein, LEA-14				IPR004864
Dr01763	Protein kinase domain|Protein kinase-like domain|Serine/threonine- / dual specificity protein kinase, catalytic domain|Protein kinase, ATP binding site	GO:0009987|GO:0044699|GO:0016301		map3k alpha 1 protein kinase	IPR000719|IPR011009|IPR002290|IPR017441	GO:0004672|GO:0005524|GO:0006468|GO:0016772
Dr01764	Short-chain dehydrogenase/reductase SDR|Glucose/ribitol dehydrogenase|NAD(P)-binding domain	GO:0016491|GO:0006810|GO:0009528|GO:0009507|GO:0055114|GO:0000166		ww domain-containing oxidoreductase-like isoform 1	IPR002198|IPR016040|IPR002347	GO:0008152|GO:0016491
Dr01765	Glucose/ribitol dehydrogenase|NAD(P)-binding domain	GO:0016630|GO:0009706|GO:0005739|GO:0005516|GO:0055114|GO:0000166|GO:0015031|GO:0015995|GO:0019685	EC:1.3.1.33	short-chain dehydrogenase tic32	IPR016040|IPR002347
Dr01766	Major intrinsic protein|Aquaporin-like|Major intrinsic protein, conserved site	GO:0009414|GO:0009941|GO:0005773|GO:0046658|GO:0006833|GO:0016021|GO:0009651|GO:0005739|GO:0005215		aquaporin	IPR000425|IPR023271|IPR022357	GO:0005215|GO:0006810|GO:0016020
Dr01767
Dr01768	Mur ligase, N-terminal|Mur ligase, C-terminal|Mur ligase, central|UDP-N-acetylmuramoylalanyl-D-glutamate-2,6-diaminopimelate ligase|Folylpolyglutamate synthetase, conserved site	GO:0009273|GO:0009058|GO:0009536|GO:0016881|GO:0009658|GO:0000166	EC:6.3.2.0	udp-n-acetylmuramoyl-l-alanyl-d-glutamate-- -diaminopimelate ligase-like	IPR000713|IPR004101|IPR013221|IPR005761|IPR018109	GO:0005524|GO:0009058|GO:0016874|GO:0005737|GO:0008360|GO:0016881|GO:0051301|GO:0004326|GO:0009396		UniPathway: UPA00219
Dr01769	Protein of unknown function DUF3741|Domain of unknown function DUF4378				IPR022212|IPR025486
Dr01770	Protein of unknown function DUF3245				IPR021641
Dr01771	Mediator complex, subunit Med12	GO:0050789		mediator of rna polymerase ii transcription subunit	IPR019035	GO:0001104|GO:0006357|GO:0016592
Dr01772	Acyl-CoA thioesterase|Cyclic nucleotide-binding domain|Acyl-CoA thioesterase II domain|Cyclic nucleotide-binding-like|RmlC-like jelly roll fold|Cyclic nucleotide-binding, conserved site				IPR003703|IPR000595|IPR025652|IPR018490|IPR014710|IPR018488	GO:0006637|GO:0047617
Dr01773		GO:0009507		uncharacterized protein
Dr01774	Protein of unknown function DUF2365				IPR019314
Dr01775	Myc-type, basic helix-loop-helix (bHLH) domain|Transcription factor MYC/MYB N-terminal				IPR011598|IPR025610	GO:0046983
Dr01776	Bromo adjacent homology (BAH) domain|Transcription elongation factor S-II, central domain|Transcription elongation factor S-IIM	GO:0006351		bah and coiled-coil domain-containing protein	IPR001025|IPR003618|IPR017890	GO:0003677|GO:0006351|GO:0005634|GO:0008270
Dr01777	Peptidase S8, subtilisin-related|Peptidase S8/S53 domain|Peptidase S8A, tripeptidyl peptidase II|Peptidase S8, subtilisin, His-active site|Peptidase S8, subtilisin, Ser-active site	GO:0022626|GO:0005773|GO:0008240|GO:0004252|GO:0005886|GO:0009507|GO:0006508|GO:0005739	EC:3.4.21.0	tripeptidyl peptidase ii	IPR015500|IPR000209|IPR022229|IPR022398|IPR023828	GO:0004252|GO:0006508
Dr01778	Bestrophin/UPF0187|Uncharacterised conserved protein, UCP016988				IPR021134|IPR024701
Dr01779	Protein of unknown function DUF3527				IPR021916
Dr01780	PAR1				IPR009489
Dr01781	UDP-glucuronosyl/UDP-glucosyltransferase	GO:0016740		zeatin o-glucosyltransferase-like	IPR002213	GO:0008152|GO:0016758
Dr01782	UDP-glucuronosyl/UDP-glucosyltransferase	GO:0016758	EC:2.4.1.0	zeatin o-glucosyltransferase-like	IPR002213	GO:0008152|GO:0016758
Dr01783	UDP-glucuronosyl/UDP-glucosyltransferase	GO:0016757		zeatin o-glucosyltransferase-like	IPR002213	GO:0008152|GO:0016758
Dr01784
Dr01785	Retrotransposon gag domain|Zinc finger, CCHC-type	GO:0005488|GO:0043170|GO:0044238		pol polyprotein	IPR005162|IPR001878	GO:0003676|GO:0008270
Dr01786	Zinc finger, CCHC-type|Zinc knuckle CX2CX4HX4C	GO:0005488		actin depolymerizing factor	IPR001878|IPR025836	GO:0003676|GO:0008270
Dr01787	Leucine-rich repeat|Leucine-rich repeat-containing N-terminal, type 2|Leucine rich repeat 4|Leucine-rich repeat, typical subtype				IPR001611|IPR013210|IPR025875|IPR003591	GO:0005515
Dr01788	ADF/Cofilin/Destrin|Actin-binding, cofilin/tropomyosin type	GO:0030042|GO:0008270|GO:0003676|GO:0006355|GO:0010089|GO:0003779|GO:0015629|GO:0003700|GO:0005667|GO:0045449		actin depolymerizing	IPR017904|IPR002108	GO:0015629|GO:0030042|GO:0003779|GO:0005622
Dr01789	Leucine-rich repeat|Leucine-rich repeat-containing N-terminal, type 2|Leucine-rich repeat, typical subtype				IPR001611|IPR013210|IPR003591	GO:0005515
Dr01790	Leucine-rich repeat|Leucine-rich repeat-containing N-terminal, type 2|Leucine-rich repeat, typical subtype				IPR001611|IPR013210|IPR003591	GO:0005515
Dr01791		GO:0016772		disease resistance protein
Dr01792	Glutamine synthetase, catalytic domain|Amidohydrolase 2|Glutamine synthetase, beta-Grasp|Glutamine synthetase/guanido kinase, catalytic domain	GO:0004356|GO:0005524|GO:0009737|GO:0006542|GO:0009252	EC:6.3.1.2	protein	IPR008146|IPR006992|IPR008147|IPR014746	GO:0004356|GO:0006807|GO:0003824|GO:0008152|GO:0006542	EC:6.3.1.2	KEGG: 00250+6.3.1.2|KEGG: 00330+6.3.1.2|KEGG: 00630+6.3.1.2|KEGG: 00910+6.3.1.2|MetaCyc: PWY-381|MetaCyc: PWY-5675|MetaCyc: PWY-6549|MetaCyc: PWY-6963|MetaCyc: PWY-6964|Reactome: REACT_13
Dr01793	Small GTPase superfamily|P-loop containing nucleoside triphosphate hydrolase|Small GTPase superfamily, Ras type|Small GTPase superfamily, Rho type|Small GTPase superfamily, Rab type|Ran GTPase|Small GTP-binding protein domain	GO:0080115|GO:0005525|GO:0030742|GO:0005777|GO:0016023|GO:0016787|GO:0007264|GO:0015031		ras-related protein rab-18	IPR001806|IPR027417|IPR020849|IPR003578|IPR003579|IPR002041|IPR005225	GO:0005525|GO:0007264|GO:0003924|GO:0006184|GO:0007165|GO:0016020|GO:0005622|GO:0015031|GO:0006886|GO:0006913		Reactome: REACT_11044
Dr01794	Major intrinsic protein|Aquaporin-like|Major intrinsic protein, conserved site	GO:0015204|GO:0016021|GO:0042742|GO:0009941|GO:0071918|GO:0009705|GO:0080170|GO:0006833|GO:0000326|GO:0042807|GO:0043674|GO:0030104|GO:0005783|GO:0005886		tonoplast intrinsic protein	IPR000425|IPR023271|IPR022357	GO:0005215|GO:0006810|GO:0016020
Dr01795	Protein of unknown function DUF966				IPR010369
Dr01796	Drug/metabolite transporter	GO:0009834|GO:0090358|GO:0009705|GO:0009826|GO:0090355|GO:0005886		auxin-induced protein 5ng4-like	IPR000620	GO:0016020
Dr01797	Pectate lyase/Amb allergen|AmbAllergen|Pectin lyase fold/virulence factor|Pectin lyase fold	GO:0030570|GO:0016023|GO:0042547|GO:0009814|GO:0016020	EC:4.2.2.2	probable pectate lyase 12-like	IPR002022|IPR011050|IPR012334|IPR018082
Dr01798	Shugoshin, C-terminal	GO:0044763		uncharacterized protein loc100823493	IPR011515	GO:0000775|GO:0005634|GO:0045132
Dr01799	Pectate lyase/Amb allergen|AmbAllergen|Pectin lyase fold/virulence factor|Pectin lyase fold	GO:0016020|GO:0016023|GO:0016829		pectate lyase	IPR002022|IPR011050|IPR012334|IPR018082
Dr01800	AUX/IAA protein|Aux/IAA-ARF-dimerisation	GO:0009987|GO:0044699		aux iaa protein	IPR003311|IPR011525	GO:0005634|GO:0006355|GO:0046983
Dr01801
Dr01802	DNA/RNA helicase, DEAD/DEAH box type, N-terminal|Helicase, C-terminal|P-loop containing nucleoside triphosphate hydrolase|Helicase, superfamily 1/2, ATP-binding domain|RNA helicase, DEAD-box type, Q motif|RNA helicase, ATP-dependent, DEAD-box, conserved site	GO:0003723|GO:0006417|GO:0000932|GO:0008026|GO:0005524|GO:0019048|GO:0006397|GO:0051028		dead-box atp-dependent rna helicase 8-like	IPR011545|IPR001650|IPR027417|IPR014001|IPR014014|IPR000629	GO:0003676|GO:0005524|GO:0008026|GO:0004386
Dr01803	Remorin, C-terminal|Remorin, N-terminal	GO:0048032|GO:0005886|GO:0007267		remorin-like protein	IPR005516|IPR005518
Dr01804	EEIG1/EHBP1 N-terminal domain				IPR019448
Dr01805
Dr01806	SET domain				IPR001214	GO:0005515
Dr01807
Dr01808	Tetratricopeptide TPR2|Tetratricopeptide-like helical|Tetratricopeptide repeat|Tetratricopeptide repeat-containing domain				IPR013105|IPR011990|IPR019734|IPR013026	GO:0005515
Dr01809
Dr01810	Leucine-rich repeat|Leucine-rich repeat-containing N-terminal, type 2|Leucine-rich repeat, typical subtype				IPR001611|IPR013210|IPR003591	GO:0005515
Dr01811	Leucine-rich repeat|Leucine-rich repeat-containing N-terminal, type 2|Leucine rich repeat 4|Leucine-rich repeat, typical subtype				IPR001611|IPR013210|IPR025875|IPR003591	GO:0005515
Dr01812	Leucine-rich repeat|Leucine-rich repeat-containing N-terminal, type 2|Leucine-rich repeat, typical subtype				IPR001611|IPR013210|IPR003591	GO:0005515
Dr01813	Leucine-rich repeat|Leucine-rich repeat-containing N-terminal, type 2|Leucine-rich repeat, typical subtype				IPR001611|IPR013210|IPR003591	GO:0005515
Dr01814	Signal recognition particle, SRP54 subunit, GTPase domain|Signal recognition particle, SRP54 subunit, helical bundle|P-loop containing nucleoside triphosphate hydrolase|AAA+ ATPase domain	GO:0005047|GO:0016706|GO:0005525|GO:0006184|GO:0005785|GO:0055114|GO:0006614|GO:0003924|GO:0005786	EC:1.14.11.0	signal recognition particle receptor subunit alpha	IPR000897|IPR013822|IPR027417|IPR003593	GO:0005525|GO:0006614|GO:0000166|GO:0017111		Reactome: REACT_15380
Dr01815	Leucine-rich repeat|Leucine-rich repeat-containing N-terminal, type 2|Leucine-rich repeat, typical subtype				IPR001611|IPR013210|IPR003591	GO:0005515
Dr01816	Leucine-rich repeat|Leucine-rich repeat-containing N-terminal, type 2|Leucine rich repeat 4|Leucine-rich repeat, typical subtype				IPR001611|IPR013210|IPR025875|IPR003591	GO:0005515
Dr01817	Thaumatin|Thaumatin, conserved site	GO:0006952		thaumatin-like protein	IPR001938|IPR017949
Dr01818	WD40 repeat|Small-subunit processome, Utp12|G-protein beta WD-40 repeat|WD40-repeat-containing domain|WD40/YVTN repeat-like-containing domain|WD40 repeat, conserved site				IPR001680|IPR007148|IPR017986|IPR015943|IPR020472|IPR019775	GO:0005515
Dr01819	Cyclin-dependent kinase, regulatory subunit	GO:0005737|GO:0000278|GO:0042023|GO:0003676|GO:0016301|GO:0016538|GO:0051726|GO:0005634|GO:0015074|GO:0051301|GO:0000074|GO:0045859		cyclin-dependent kinases regulatory subunit	IPR000789	GO:0007049|GO:0016538
Dr01820		GO:0016023		uncharacterized protein
Dr01821	Rieske [2Fe-2S] iron-sulphur domain|Pheophorbide a oxygenase	GO:0022900|GO:0051537|GO:0005739|GO:0008219|GO:0046872|GO:0010277|GO:0010154|GO:0009908|GO:0016630|GO:0015996|GO:0032441|GO:0009507|GO:0009816|GO:0015995|GO:0019685	EC:1.13.12.14|EC:1.3.1.33	lethal leaf spot 1-like protein	IPR017941|IPR013626	GO:0016491|GO:0051537|GO:0055114|GO:0010277
Dr01822
Dr01823	Protein of unknown function DUF1997	GO:0009507		(rap annotation release2) galactose-binding like domain containing protein	IPR018971
Dr01824	Peptidase S26A, signal peptidase I|Peptidase S24/S26A/S26B|Peptidase S24/S26A/S26B/S26C|Peptidase S24/S26, beta-ribbon domain|Peptidase S26A, signal peptidase I, lysine active site	GO:0005739|GO:0016021|GO:0008236|GO:0006508		mitochondrial inner membrane protease subunit 2	IPR000223|IPR019759|IPR015927|IPR028360|IPR019757	GO:0006508|GO:0008236|GO:0016020|GO:0016021
Dr01825	Peptidase M1, alanine aminopeptidase/leukotriene A4 hydrolase|Peptidase M1, alanyl aminopeptidase|Peptidase M1, membrane alanine aminopeptidase, N-terminal|Peptidase M1, alanyl aminopeptidase, C-terminal	GO:0008270|GO:0015238|GO:0005739|GO:0006855|GO:0009941|GO:0004177|GO:0006508|GO:0008237|GO:0016023|GO:0009570|GO:0005773|GO:0046686|GO:0015297|GO:0005886|GO:0048046	EC:3.4.11.0	peptidase m1 family protein	IPR001930|IPR012779|IPR014782|IPR024601	GO:0006508|GO:0008270|GO:0008237
Dr01826	Tryptophan synthase beta subunit-like PLP-dependent enzymes superfamily|Cysteine synthase K/M|Cysteine synthase A|Cysteine synthase/cystathionine beta-synthase P-phosphate-binding site	GO:0005507|GO:0004124|GO:0006535|GO:0016740|GO:0009507|GO:0019499|GO:0050017|GO:0005739|GO:0009333	EC:2.5.1.47|EC:4.4.1.9	cysteine synthase	IPR001926|IPR005856|IPR005859|IPR001216	GO:0004124|GO:0006535	EC:2.5.1.47	KEGG: 00270+2.5.1.47|KEGG: 00920+2.5.1.47|MetaCyc: PWY-6936|UniPathway: UPA00136
Dr01827	Zinc finger, RING-type|Zinc finger, RING/FYVE/PHD-type				IPR001841|IPR013083	GO:0005515|GO:0008270
Dr01828	Serine-threonine/tyrosine-protein kinase catalytic domain|Protein kinase-like domain|Concanavalin A-like lectin/glucanase, subgroup|Serine/threonine- / dual specificity protein kinase, catalytic domain|Protein kinase domain|Protein kinase, ATP binding site|Serine/threonine-protein kinase, active site	GO:0009555|GO:0006468|GO:0005524|GO:0004674|GO:0009069	EC:2.7.11.0	probable leucine-rich repeat receptor-like protein kinase at4g00330-like	IPR001245|IPR011009|IPR013320|IPR002290|IPR000719|IPR017441|IPR008271	GO:0004672|GO:0006468|GO:0016772|GO:0005524|GO:0004674
Dr01829	Protein of unknown function DUF3522	GO:0016020		transmembrane protein	IPR021910
Dr01830	Protein phosphatase 2C|Protein phosphatase 2C (PP2C)-like domain	GO:1901700|GO:0004721|GO:0006470	EC:3.1.3.16	protein phosphatase 2c	IPR015655|IPR001932	GO:0003824
Dr01831	Methyltransferase-like				IPR026113		EC:2.1.1.-	KEGG: 00130+2.1.1.-|KEGG: 00253+2.1.1.-|KEGG: 00270+2.1.1.-|KEGG: 00340+2.1.1.-|KEGG: 00350+2.1.1.-|KEGG: 00360+2.1.1.-|KEGG: 00380+2.1.1.-|KEGG: 00450+2.1.1.-|KEGG: 00522+2.1.1.-|KEGG: 00624+2.1.1.-|KEGG: 00627+2.1.1.-|KEGG: 00860+2.1.1.-|KEGG: 00940+2.1.1.-|KEGG: 00941+2.1.1.-|KEGG: 00942+2.1.1.-|KEGG: 00945+2.1.1.-|KEGG: 00950+2.1.1.-|KEGG: 00981+2.1.1.-
Dr01832	SNF2-related|Helicase, C-terminal|Lateral organ boundaries, LOB|HIP116, Rad5p N-terminal|P-loop containing nucleoside triphosphate hydrolase|Zinc finger, RING/FYVE/PHD-type|Zinc finger, RING-type|Helicase, superfamily 1/2, ATP-binding domain|Zinc finger, RING-type, conserved site	GO:0003676|GO:0046872|GO:0016818	EC:3.6.1.0	swi snf-related matrix-associated actin-dependent regulator of chromatin subfamily a member 3-like 3-like	IPR000330|IPR001650|IPR004883|IPR014905|IPR027417|IPR013083|IPR001841|IPR014001|IPR017907	GO:0003677|GO:0005524|GO:0003676|GO:0004386|GO:0008270|GO:0016818|GO:0005515
Dr01833	Cyclophilin-like peptidyl-prolyl cis-trans isomerase domain|Cyclophilin-type peptidyl-prolyl cis-trans isomerase|Cyclophilin-type peptidyl-prolyl cis-trans isomerase, conserved site	GO:0006457|GO:0016853		cyclophilin	IPR002130|IPR024936|IPR020892	GO:0003755|GO:0006457
Dr01834	Actin-related protein|Actin-related protein 8/Plant actin-related protein 9				IPR004000|IPR027668	GO:0006338|GO:0031011
Dr01835	Actin-related protein|Actin-related protein 8/Plant actin-related protein 9				IPR004000|IPR027668	GO:0006338|GO:0031011
Dr01836	Nucleic acid-binding, OB-fold				IPR012340
Dr01837	Eukaryotic porin/Tom40|Porin domain	GO:0055085|GO:0044070|GO:0015288|GO:0009617|GO:0005741|GO:0008308|GO:0046930|GO:0005886		outer mitochondrial membrane protein porin	IPR027246|IPR023614	GO:0005741|GO:0055085
Dr01838	Amine oxidase|SWIRM domain|Homeodomain-like|Winged helix-turn-helix DNA-binding domain	GO:0055114|GO:0008270|GO:0006355|GO:0009536|GO:0016575|GO:0009911|GO:0051568|GO:0010228|GO:0016491|GO:0043565|GO:0003700|GO:0000166|GO:0005667|GO:0045449		flowering locus d	IPR002937|IPR007526|IPR009057|IPR011991	GO:0016491|GO:0055114|GO:0005515|GO:0003677
Dr01839	Fatty acid hydroxylase	GO:0006633|GO:0005506|GO:0016021|GO:0000254|GO:0008270|GO:0016126|GO:0055114	EC:1.14.13.72	c-4 sterol methyl oxidase	IPR006694	GO:0005506|GO:0006633|GO:0016491|GO:0055114
Dr01840	Fatty acid hydroxylase	GO:0046914|GO:0044283|GO:0016491|GO:0008610|GO:0016020		protein	IPR006694	GO:0005506|GO:0006633|GO:0016491|GO:0055114
Dr01841	Fatty acid hydroxylase	GO:0016020		methylsterol monooxygenase ddb_g0269788-like	IPR006694	GO:0005506|GO:0006633|GO:0016491|GO:0055114
Dr01842	Transcription factor DP|Transcription factor E2F/dimerisation partner (TDP)|Transcription factor DP, C-terminal|Winged helix-turn-helix DNA-binding domain	GO:0006355|GO:0005667|GO:0003677|GO:0003700|GO:0046982|GO:0042023|GO:0005737|GO:0045449		transcription factor e2 dimerization partner protein	IPR015648|IPR003316|IPR014889|IPR011991	GO:0005667|GO:0007049|GO:0003700|GO:0006355
Dr01843	Vps54-like|Vacuolar protein sorting-associated protein 54	GO:0009536		vacuolar protein sorting-associated protein 54-like	IPR012501|IPR019515	GO:0042147
Dr01844	Signal transduction response regulator, receiver domain|SANT/Myb domain|Homeodomain-like|CheY-like superfamily|Myb domain, plants	GO:0048576|GO:0003677|GO:0050794		type b response regulator	IPR001789|IPR001005|IPR009057|IPR011006|IPR006447	GO:0000156|GO:0000160|GO:0006355|GO:0003682|GO:0003677		Reactome: REACT_14797
Dr01845	ABC transporter-like|P-loop containing nucleoside triphosphate hydrolase|AAA+ ATPase domain	GO:0015423|GO:0006200|GO:0005524|GO:0016020|GO:0015768	EC:3.6.3.19	white-brown-complex abc transporter family	IPR003439|IPR027417|IPR003593	GO:0005524|GO:0016887|GO:0000166|GO:0017111
Dr01846	DVL				IPR012552
Dr01847	RNA polymerase sigma-70 region 3|RNA polymerase sigma-70 region 2|RNA polymerase sigma-70 region 4|RNA polymerase sigma-70|RNA polymerase sigma factor, region 3/4|RNA polymerase sigma factor, region 2|Winged helix-turn-helix DNA-binding domain|RNA polymerase sigma-70 like domain	GO:0003899|GO:0006355|GO:0009536|GO:0003677|GO:0003700|GO:0016987|GO:0006352|GO:0005730|GO:0006144|GO:0006206|GO:0005667|GO:0045449	EC:2.7.7.6	rna polymerase sigma factor rpod	IPR007624|IPR007627|IPR007630|IPR013324|IPR013325|IPR011991|IPR000943|IPR014284	GO:0003677|GO:0003700|GO:0006352|GO:0006355|GO:0016987
Dr01848	MaoC-like domain	GO:0071704|GO:0016491|GO:0016740|GO:0044238|GO:0005739|GO:0055114		domain protein dehydratase	IPR002539	GO:0008152|GO:0016491
Dr01849	Chaperonin Cpn60/TCP-1|Chaperone tailless complex polypeptide 1 (TCP-1)|GroEL-like apical domain|GroEL-like equatorial domain|Chaperonin Cpn60|Chaperonin Cpn60, conserved site	GO:0042026|GO:0005739|GO:0009941|GO:0009658|GO:0009579|GO:0005524|GO:0009570|GO:0022626|GO:0016020|GO:0009790|GO:0048046		rubisco subunit binding-protein alpha subunit	IPR002423|IPR027409|IPR027413|IPR017998|IPR001844|IPR018370	GO:0005524|GO:0044267|GO:0005737|GO:0042026|GO:0006457
Dr01850	Ovarian tumour, otubain				IPR003323
Dr01851	Translin|Translin, N-terminal|Translin, C-terminal	GO:0043565|GO:0009507		translin-like protein	IPR002848|IPR016068|IPR016069	GO:0043565
Dr01852	Homeodomain-like				IPR009057	GO:0003677
Dr01853	Leucine-rich repeat|Leucine-rich repeat-containing N-terminal, type 2|Leucine-rich repeat, typical subtype				IPR001611|IPR013210|IPR003591	GO:0005515
Dr01854	Carbonic anhydrase, alpha-class|Alpha carbonic anhydrase|Carbonic anhydrase, alpha-class, conserved site	GO:0016023|GO:0010037|GO:0006730|GO:0004089|GO:0008270|GO:0006807	EC:4.2.1.1	bifunctional monodehydroascorbate reductase and carbonic anhydrase nectarin-3-like	IPR023561|IPR001148|IPR018338	GO:0004089|GO:0006730|GO:0008270	EC:4.2.1.1	KEGG: 00910+4.2.1.1|MetaCyc: PWY-6142
Dr01855	Carbonic anhydrase, alpha-class|Alpha carbonic anhydrase				IPR023561|IPR001148
Dr01856	Carbonic anhydrase, alpha-class|Alpha carbonic anhydrase				IPR023561|IPR001148
Dr01857	Carbonic anhydrase, alpha-class|Alpha carbonic anhydrase				IPR023561|IPR001148
Dr01858	Carbonic anhydrase, alpha-class|Alpha carbonic anhydrase				IPR023561|IPR001148
Dr01859	Carbonic anhydrase, alpha-class|Alpha carbonic anhydrase|Carbonic anhydrase, alpha-class, conserved site	GO:0046872|GO:0016023|GO:0016829		bifunctional monodehydroascorbate reductase and carbonic anhydrase nectarin-3-like	IPR023561|IPR001148|IPR018338	GO:0004089|GO:0006730|GO:0008270	EC:4.2.1.1	KEGG: 00910+4.2.1.1|MetaCyc: PWY-6142
Dr01860	Carbonic anhydrase, alpha-class|Alpha carbonic anhydrase|Carbonic anhydrase, alpha-class, conserved site	GO:0016023		dioscorin precursor	IPR023561|IPR001148|IPR018338	GO:0004089|GO:0006730|GO:0008270	EC:4.2.1.1	KEGG: 00910+4.2.1.1|MetaCyc: PWY-6142
Dr01861	Carbonic anhydrase, alpha-class|Alpha carbonic anhydrase|Carbonic anhydrase, alpha-class, conserved site	GO:0016023		carbonic anhydrase family protein	IPR023561|IPR001148|IPR018338	GO:0004089|GO:0006730|GO:0008270	EC:4.2.1.1	KEGG: 00910+4.2.1.1|MetaCyc: PWY-6142
Dr01862	Bystin				IPR007955
Dr01863	Pentatricopeptide repeat|Tetratricopeptide-like helical				IPR002885|IPR011990	GO:0005515
Dr01864	FAD-dependent pyridine nucleotide-disulphide oxidoreductase|Pyridine nucleotide-disulphide oxidoreductase, class-II	GO:0009851|GO:0050660|GO:0050661|GO:0004499|GO:0009742|GO:0055114	EC:1.14.13.8	flavin-containing monooxygenase yucca8-like	IPR013027|IPR000103	GO:0055114|GO:0016491
Dr01865
Dr01866	Coactivator CBP, KIX domain				IPR003101	GO:0003712|GO:0006355
Dr01867		GO:0005488|GO:0034645|GO:0090304		protein
Dr01868	Protein kinase domain|Leucine-rich repeat|Leucine-rich repeat-containing N-terminal, type 2|Protein kinase-like domain|Serine/threonine- / dual specificity protein kinase, catalytic domain|Leucine-rich repeat, typical subtype|Protein kinase, ATP binding site|Serine/threonine-protein kinase, active site	GO:0004674|GO:0016491|GO:0016023|GO:0000166|GO:0016310|GO:0016020|GO:0009069	EC:2.7.11.0	leucine-rich repeat receptor-like protein kinase pxl2-like	IPR000719|IPR001611|IPR013210|IPR011009|IPR002290|IPR003591|IPR017441|IPR008271	GO:0004672|GO:0005524|GO:0006468|GO:0005515|GO:0016772|GO:0004674
Dr01869	Exostosin-like	GO:0030173|GO:0010256|GO:0016023|GO:0009863|GO:0009826|GO:0009969|GO:0016757|GO:0042353		xyloglucan galactosyltransferase katamari1-like	IPR004263
Dr01870	TMS membrane protein/tumour differentially expressed protein	GO:0016020|GO:0005739		serine incorporator 3-like	IPR005016	GO:0016020
Dr01871	Tetraspanin/Peripherin				IPR018499	GO:0016021
Dr01872	Protein of unknown function DUF3741|Domain of unknown function DUF4378				IPR022212|IPR025486
Dr01873	DNA mismatch repair protein MutS, type 1|DNA mismatch repair protein MutS, C-terminal|GIY-YIG nuclease superfamily|DNA mismatch repair protein MutS-like, N-terminal|P-loop containing nucleoside triphosphate hydrolase|DNA mismatch repair protein MutS, N-terminal	GO:0009411|GO:0003684|GO:0032138|GO:0000228|GO:0032301|GO:0032137|GO:0000002|GO:0044444|GO:0007131|GO:0045910|GO:0008094|GO:0000400|GO:0043570|GO:0000710		dna mismatch repair protein	IPR005748|IPR000432|IPR000305|IPR007695|IPR027417|IPR016151	GO:0005524|GO:0006298|GO:0030983
Dr01874	Glutaredoxin|Glutaredoxin subgroup|Thioredoxin-like fold|Glutaredoxin, eukaryotic/virial	GO:0046872|GO:0009055|GO:0045454|GO:0009570|GO:0051537|GO:0015035|GO:0006118		grx_s12 - glutaredoxin subgroup i	IPR002109|IPR012336|IPR014025|IPR011899	GO:0009055|GO:0015035|GO:0045454
Dr01875	Protein of unknown function DUF3493	GO:0009507		uncharacterized protein	IPR021883
Dr01876	Zinc finger, PHD-finger|Inhibitor of growth protein, N-terminal|Zinc finger, FYVE/PHD-type|Zinc finger, RING/FYVE/PHD-type|Zinc finger, PHD-type|Zinc finger, PHD-type, conserved site	GO:0046872		phd-finger protein	IPR019787|IPR024610|IPR011011|IPR013083|IPR001965|IPR019786	GO:0005515|GO:0008270
Dr01877	Lipase, GDSL|SGNH hydrolase-type esterase domain	GO:0006629|GO:0016788		gdsl esterase lipase at5g33370-like	IPR001087|IPR013831	GO:0006629|GO:0016788|GO:0016787
Dr01878	Methyltransferase-like|Methyltransferase type 12|Nicotinamide N-methyltransferase-like				IPR026113|IPR013217|IPR019410		EC:2.1.1.-	KEGG: 00130+2.1.1.-|KEGG: 00253+2.1.1.-|KEGG: 00270+2.1.1.-|KEGG: 00340+2.1.1.-|KEGG: 00350+2.1.1.-|KEGG: 00360+2.1.1.-|KEGG: 00380+2.1.1.-|KEGG: 00450+2.1.1.-|KEGG: 00522+2.1.1.-|KEGG: 00624+2.1.1.-|KEGG: 00627+2.1.1.-|KEGG: 00860+2.1.1.-|KEGG: 00940+2.1.1.-|KEGG: 00941+2.1.1.-|KEGG: 00942+2.1.1.-|KEGG: 00945+2.1.1.-|KEGG: 00950+2.1.1.-|KEGG: 00981+2.1.1.-
Dr01879	Vacuolar protein sorting-associated protein 62				IPR009291
Dr01880	WD40 repeat|G-protein beta WD-40 repeat|WD40-repeat-containing domain|WD40/YVTN repeat-like-containing domain|WD40 repeat, conserved site				IPR001680|IPR017986|IPR015943|IPR020472|IPR019775	GO:0005515
Dr01881	SANT/Myb domain|AWPM-19-like|Homeodomain-like|Myb domain	GO:0016020|GO:0016023		plasma membrane associated protein	IPR001005|IPR008390|IPR009057|IPR017930	GO:0003682|GO:0003677
Dr01882	Glycoside hydrolase, family 14|Glycoside hydrolase, family 14B, plant|Glycoside hydrolase, superfamily|Glycoside hydrolase, catalytic domain|Glycoside hydrolase, family 14, conserved site	GO:0009414|GO:0016161|GO:0005983|GO:0005634|GO:0005829|GO:0005985	EC:3.2.1.2	beta-amylase chloroplastic-like	IPR001554|IPR017853|IPR013781|IPR001371|IPR018238	GO:0000272|GO:0016161|GO:0003824|GO:0005975	EC:3.2.1.2	KEGG: 00500+3.2.1.2|MetaCyc: PWY-6724|MetaCyc: PWY-842
Dr01883	Serine-threonine/tyrosine-protein kinase catalytic domain|Protein kinase-like domain|Concanavalin A-like lectin/glucanase, subgroup|Protein kinase domain|Protein kinase, ATP binding site|Serine/threonine-protein kinase, active site	GO:0048731|GO:0004672|GO:0044767		receptor-like serine threonine-protein kinase ale2-like	IPR001245|IPR011009|IPR013320|IPR000719|IPR017441|IPR008271	GO:0004672|GO:0006468|GO:0016772|GO:0005524|GO:0004674
Dr01884	Ribosomal protein L21e|Translation protein SH3-like domain|Ribosomal protein L21e, conserved site	GO:0005730|GO:0003735|GO:0022625|GO:0009507|GO:0006412|GO:0005739|GO:0042254		60s ribosomal protein l21	IPR001147|IPR008991|IPR018259	GO:0003735|GO:0005622|GO:0005840|GO:0006412
Dr01885	Pentatricopeptide repeat|Tetratricopeptide-like helical				IPR002885|IPR011990	GO:0005515
Dr01886	CrcB homologue	GO:0005886|GO:0009536		#NAME?	IPR003691	GO:0016020
Dr01887	Tetratricopeptide-like helical|Tetratricopeptide repeat-containing domain	GO:0005622|GO:0006396		tpr domain protein	IPR011990|IPR013026	GO:0005515
Dr01888	Gnk2-homologous domain				IPR002902
Dr01889	CCT domain				IPR010402	GO:0005515
Dr01890	Protein of unknown function DUF3527				IPR021916
Dr01891	Proton-dependent oligopeptide transporter family|Major facilitator superfamily domain, general substrate transporter	GO:0042538|GO:0080052|GO:0042742|GO:0009624|GO:0042939|GO:0009753|GO:0042936|GO:0043201|GO:0009611|GO:0009751|GO:0009737|GO:0042937|GO:0016020|GO:0042938|GO:0080053		peptide transporter ptr3-a	IPR000109|IPR016196	GO:0005215|GO:0006810|GO:0016020		Reactome: REACT_15518|Reactome: REACT_19419
Dr01892	Protein of unknown function DUF810|Munc13 homology 1|Mammalian uncoordinated homology 13, domain 2				IPR008528|IPR014770|IPR014772
Dr01893
Dr01894	ARP2/3 complex, 34kDa subunit (p34-Arc)				IPR007188	GO:0005856|GO:0030833
Dr01895	Cyanate lyase, C-terminal|Cyanate hydratase|Lambda repressor-like, DNA-binding domain	GO:0003677|GO:0016829		cyanate hydratase	IPR003712|IPR010982|IPR008076	GO:0009439|GO:0003677|GO:0008824	EC:4.2.1.104	KEGG: 00910+4.2.1.104
Dr01896	RNA recognition motif domain|Nucleotide-binding, alpha-beta plait				IPR000504|IPR012677	GO:0003676|GO:0000166
Dr01897	Tetratricopeptide-like helical|Tetratricopeptide repeat|Tetratricopeptide repeat-containing domain	GO:0005739		tetratricopeptide repeat protein 7b	IPR011990|IPR019734|IPR013026	GO:0005515
Dr01898	Cyclin-dependent kinase inhibitor	GO:0007050|GO:0004861|GO:0005634|GO:0045859		cyclin dependent kinase inhibitor	IPR003175	GO:0004861|GO:0005634|GO:0007050
Dr01899	RING-type zinc-finger, LisH dimerisation motif|Zinc finger, RING/FYVE/PHD-type|Zinc finger, RING-type|Zinc finger, RING-type, conserved site				IPR027370|IPR013083|IPR001841|IPR017907	GO:0005515|GO:0008270
Dr01900	WD40 repeat|LisH dimerisation motif, subgroup|G-protein beta WD-40 repeat|WD40-repeat-containing domain|WD40/YVTN repeat-like-containing domain|LisH dimerisation motif|WD40 repeat, conserved site	GO:0048856|GO:0016023|GO:0007275|GO:0016740		transcriptional corepressor leunig	IPR001680|IPR013720|IPR017986|IPR015943|IPR020472|IPR006594|IPR019775	GO:0005515
Dr01901	Glucosylceramidase|Beta-glucosidase, GBA2 type, N-terminal|Six-hairpin glycosidase-like|Six-hairpin glycosidase|Beta-glucosidase, GBA2 type	GO:0006680|GO:0005886|GO:0004348|GO:0016021|GO:0005975	EC:3.2.1.45	non-lysosomal glucosylceramidase-like	IPR006775|IPR024462|IPR008928|IPR012341|IPR014551	GO:0004348|GO:0006665|GO:0016021|GO:0003824|GO:0006680|GO:0016020	EC:3.2.1.45	KEGG: 00511+3.2.1.45|KEGG: 00600+3.2.1.45
Dr01902
Dr01903	UDP-glucose:Glycoprotein Glucosyltransferase|Glycosyl transferase, family 8	GO:0097359|GO:0003980|GO:0045087|GO:0006486|GO:0051716		udp-glucose:glycoprotein glucosyltransferase	IPR009448|IPR002495	GO:0003980|GO:0006486|GO:0016757	EC:2.4.1.-	KEGG: 00051+2.4.1.-|KEGG: 00512+2.4.1.-|KEGG: 00513+2.4.1.-|KEGG: 00514+2.4.1.-|KEGG: 00522+2.4.1.-|KEGG: 00533+2.4.1.-|KEGG: 00540+2.4.1.-|KEGG: 00550+2.4.1.-|KEGG: 00561+2.4.1.-|KEGG: 00563+2.4.1.-|KEGG: 00600+2.4.1.-|KEGG: 00601+2.4.1.-|KEGG: 00603+2.4.1.-|KEGG: 00604+2.4.1.-|KEGG: 00906+2.4.1.-|KEGG: 00908+2.4.1.-|KEGG: 00941+2.4.1.-|KEGG: 00942+2.4.1.-|KEGG: 00944+2.4.1.-|KEGG: 00945+2.4.1.-…
Dr01904	Glycoside hydrolase, family 1|Glycoside hydrolase, superfamily|Glycoside hydrolase, catalytic domain|Glycoside hydrolase, family 1, active site	GO:0005975|GO:0016023|GO:0009809|GO:0008422	EC:3.2.1.21	bgl18_orysj ame: full=beta-glucosidase 18 short=os4bglu18 flags: precursor	IPR001360|IPR017853|IPR013781|IPR018120	GO:0004553|GO:0005975|GO:0003824
Dr01905	Succinyl-CoA synthetase, beta subunit|ATP-citrate lyase/succinyl-CoA ligase|ATP-grasp fold, succinyl-CoA synthetase-type|Succinyl-CoA synthetase-like|ATP-grasp fold, subdomain 1|ATP-grasp fold, subdomain 2|ATP-grasp fold|Succinyl-CoA synthetase, beta subunit, conserved site	GO:0005507|GO:0006105|GO:0005739|GO:0006104|GO:0004775|GO:0005524|GO:0046686|GO:0004776|GO:0019643|GO:0042709	EC:6.2.1.5|EC:6.2.1.4	succinyl- ligase	IPR005809|IPR005811|IPR013650|IPR016102|IPR013815|IPR013816|IPR011761|IPR017866	GO:0003824|GO:0008152|GO:0005524|GO:0046872	EC:6.2.1.5	KEGG: 00020+6.2.1.5|KEGG: 00640+6.2.1.5|KEGG: 00660+6.2.1.5|KEGG: 00720+6.2.1.5|MetaCyc: PWY-5392|MetaCyc: PWY-5537|MetaCyc: PWY-5538|MetaCyc: PWY-5690|MetaCyc: PWY-5913|MetaCyc: PWY-6728|MetaCyc: PWY-6969|Reactome: REACT_1046|UniPathway: UPA00223|KEGG: 00020+6.2.1.5|KEGG: 00640+6.2.1.5|KEGG: 00660+6.2.1.5|KEGG: 00720+6.2.1.5|MetaCyc: PWY-5392|MetaCyc: PWY-5537|MetaCyc: PWY-5538|MetaCyc: PWY-5690…
Dr01906	Glucose-methanol-choline oxidoreductase, N-terminal|Glucose-methanol-choline oxidoreductase, C-terminal|Alcohol dehydrogenase, long-chain fatty	GO:0006066|GO:0009409|GO:0046577|GO:0005739|GO:0055114	EC:1.1.3.20	long-chain-alcohol oxidase fao1-like	IPR000172|IPR007867|IPR012400	GO:0016614|GO:0050660|GO:0055114|GO:0046577
Dr01907	AP complex, mu/sigma subunit|Longin-like domain	GO:0000139|GO:0005886|GO:0006810|GO:0031410		nonclathrin coat protein zeta2-cop	IPR022775|IPR011012	GO:0006810
Dr01908	Pentatricopeptide repeat|Tetratricopeptide-like helical				IPR002885|IPR011990	GO:0005515
Dr01909	Short-chain dehydrogenase/reductase SDR|Glucose/ribitol dehydrogenase|NAD(P)-binding domain|Short-chain dehydrogenase/reductase, conserved site	GO:0008152		momilactone a synthase-like	IPR016040|IPR002198|IPR002347|IPR020904	GO:0008152|GO:0016491
Dr01910	Protein kinase domain|Protein kinase-like domain|Serine/threonine- / dual specificity protein kinase, catalytic domain|Protein kinase, ATP binding site|Serine/threonine-protein kinase, active site	GO:0006468|GO:0004674|GO:0048364|GO:0009850|GO:0004712|GO:0009741|GO:0005524|GO:0009826|GO:0005737|GO:0005634|GO:0009069	EC:2.7.11.0|EC:2.7.112.1	casein kinase i isoform delta-like	IPR000719|IPR011009|IPR002290|IPR017441|IPR008271	GO:0004672|GO:0005524|GO:0006468|GO:0016772|GO:0004674
Dr01911	Snf7				IPR005024	GO:0015031
Dr01912	EF-hand domain pair|EF-hand domain|EF-Hand 1, calcium-binding site	GO:0005739|GO:0005634|GO:0005509		serine threonine-protein phosphatase 2a regulatory subunit b subunit alpha-like	IPR011992|IPR002048|IPR018247	GO:0005509
Dr01913	RNA recognition motif domain|Nucleotide-binding, alpha-beta plait				IPR000504|IPR012677	GO:0003676|GO:0000166
Dr01914	Ribosomal protein L14|Translation protein SH3-like domain|Ribosomal protein L2 domain 2	GO:0005840|GO:0043231		60s ribosomal protein	IPR002784|IPR008991|IPR014722	GO:0003735|GO:0005622|GO:0005840|GO:0006412
Dr01915	Dolichyl-diphosphooligosaccharide--protein glycosyltransferase subunit Swp1	GO:0016023|GO:0016740|GO:0044425|GO:0005783		dolichyl-diphosphooligosaccharide--protein glycosyltransferase subunit 2-like	IPR008814	GO:0006487|GO:0008250|GO:0016021	EC:2.4.99.18	KEGG: 00510+2.4.99.18|KEGG: 00513+2.4.99.18|UniPathway: UPA00378
Dr01916	Pentatricopeptide repeat|Tetratricopeptide-like helical				IPR002885|IPR011990	GO:0005515
Dr01917	Exportin-1/Importin-beta-like|Armadillo-type fold|Armadillo-like helical|Importin-beta, N-terminal domain				IPR013598|IPR016024|IPR011989|IPR001494	GO:0005488|GO:0006886|GO:0008536
Dr01918
Dr01919	Domain of unknown function DUF640				IPR006936
Dr01920	Ankyrin repeat-containing domain|Zinc finger, RING/FYVE/PHD-type|Zinc finger, RING-type|Ankyrin repeat				IPR020683|IPR013083|IPR001841|IPR002110	GO:0005515|GO:0008270
Dr01921	Sec23/Sec24, trunk domain|Sec23/Sec24, helical domain|Sec23/Sec24 beta-sandwich|von Willebrand factor, type A	GO:0080119|GO:0030127|GO:0006886|GO:0006888|GO:0008270		protein transport protein sec24-like at3g07100-like	IPR006896|IPR006900|IPR012990|IPR002035	GO:0006886|GO:0006888|GO:0030127		Reactome: REACT_11123
Dr01922	Zinc finger, Sec23/Sec24-type|Sec23/Sec24, trunk domain|von Willebrand factor, type A	GO:0080119|GO:0030127|GO:0006886|GO:0006888|GO:0008270		protein transport protein sec24-like at3g07100-like	IPR006895|IPR006896|IPR002035	GO:0006886|GO:0006888|GO:0008270|GO:0030127		Reactome: REACT_11123
Dr01923	SANT/Myb domain|Homeodomain-like|Myb domain				IPR001005|IPR009057|IPR017930	GO:0003682|GO:0003677
Dr01924	Peptidase S8, subtilisin-related|Peptidase S8/S53 domain|Peptidase S8, subtilisin, His-active site	GO:0016787		xylem serine proteinase 1	IPR015500|IPR000209|IPR022398	GO:0004252|GO:0006508
Dr01925	Peptidase S8, subtilisin-related|Peptidase S8/S53 domain|Protease-associated domain, PA|Peptidase S8, subtilisin, Asp-active site|Peptidase S8, subtilisin, His-active site|Peptidase S8, subtilisin, Ser-active site	GO:0016787		xylem serine proteinase 1	IPR015500|IPR000209|IPR003137|IPR023827|IPR022398|IPR023828	GO:0004252|GO:0006508
Dr01926	Peptidase S8, subtilisin-related|Peptidase S8/S53 domain|Protease-associated domain, PA|Peptidase S8, subtilisin, Asp-active site|Peptidase S8, subtilisin, His-active site	GO:0044464|GO:0008152|GO:0008236		subtilisin-like protease sdd1-like	IPR015500|IPR000209|IPR003137|IPR023827|IPR022398	GO:0004252|GO:0006508
Dr01927	Peptidase S8, subtilisin-related	GO:0008152|GO:0016491|GO:0008236		xylem serine proteinase 1	IPR015500
Dr01928	Peptidase S8, subtilisin-related|Peptidase S8/S53 domain|Protease-associated domain, PA|Proteinase inhibitor I9|Peptidase S8, subtilisin, Asp-active site|Peptidase S8, subtilisin, His-active site|Peptidase S8, subtilisin, Ser-active site	GO:0016787		xylem serine proteinase 1	IPR015500|IPR000209|IPR003137|IPR010259|IPR023827|IPR022398|IPR023828	GO:0004252|GO:0006508|GO:0042802|GO:0043086
Dr01929	Peptidase S8, subtilisin-related|Peptidase S8/S53 domain|Protease-associated domain, PA|Peptidase S8, subtilisin, Asp-active site|Peptidase S8, subtilisin, His-active site|Peptidase S8, subtilisin, Ser-active site	GO:0016787		xylem serine proteinase 1	IPR015500|IPR000209|IPR003137|IPR023827|IPR022398|IPR023828	GO:0004252|GO:0006508
Dr01930	Aminotransferase-like, plant mobile domain				IPR019557
Dr01931
Dr01932
Dr01933
Dr01934	Adenosine kinase|Carbohydrate kinase PfkB|Carbohydrate/puine kinase, PfkB, conserved site	GO:0004001|GO:0006166|GO:0005507|GO:0016773|GO:0030036|GO:0080094|GO:0003779|GO:0006167|GO:0016310|GO:0008290|GO:0009507|GO:0046686|GO:0005886|GO:0048046|GO:0006144	EC:2.7.1.20|EC:2.7.1.0	adenosine kinase 2	IPR001805|IPR011611|IPR002173	GO:0004001|GO:0006166|GO:0016773	EC:2.7.1.20	KEGG: 00230+2.7.1.20|MetaCyc: PWY-6619|UniPathway: UPA00588
Dr01935	Aromatic amino acid lyase|L-Aspartase-like|Fumarase/histidase, N-terminal|Phenylalanine ammonia-lyase	GO:0006979|GO:0010224|GO:0045548|GO:0009800|GO:0006559|GO:0009555|GO:0046274|GO:0009819|GO:0046244|GO:0005737|GO:0080167|GO:0006570|GO:0009821	EC:4.3.1.5	phenylalanine ammonia-lyase	IPR001106|IPR008948|IPR024083|IPR005922	GO:0009058|GO:0016841|GO:0003824|GO:0005737|GO:0006559	EC:4.3.1.24	KEGG: 00360+4.3.1.24|KEGG: 00940+4.3.1.24|MetaCyc: PWY-1121|MetaCyc: PWY-5883|MetaCyc: PWY-6444|MetaCyc: PWY-6457|UniPathway: UPA00713
Dr01936	Aromatic amino acid lyase|L-Aspartase-like|Phenylalanine ammonia-lyase, shielding domain|Fumarase/histidase, N-terminal|Phenylalanine ammonia-lyase|Phenylalanine/histidine ammonia-lyases, active site	GO:0006979|GO:0010224|GO:0045548|GO:0009800|GO:0006559|GO:0009555|GO:0046274|GO:0009819|GO:0046244|GO:0005737|GO:0080167|GO:0006570|GO:0009821	EC:4.3.1.5	phenylalanine ammonia-lyase	IPR001106|IPR008948|IPR023144|IPR024083|IPR005922|IPR022313	GO:0009058|GO:0016841|GO:0003824|GO:0005737|GO:0006559	EC:4.3.1.24	KEGG: 00360+4.3.1.24|KEGG: 00940+4.3.1.24|MetaCyc: PWY-1121|MetaCyc: PWY-5883|MetaCyc: PWY-6444|MetaCyc: PWY-6457|UniPathway: UPA00713
Dr01937	Small subunit of serine palmitoyltransferase-like				IPR024512			UniPathway: UPA00222
Dr01938	C2 domain	GO:0044763|GO:0051704|GO:0006950|GO:0016192|GO:0016020|GO:0005739		plant synaptotagmin	IPR000008	GO:0005515
Dr01939	Zinc finger, RING-type|Zinc finger, RING/FYVE/PHD-type|von Willebrand factor, type A	GO:0043167		protein binding	IPR001841|IPR013083|IPR002035	GO:0005515|GO:0008270
Dr01940	TFIIH subunit Ssl1/p44|Ssl1-like|TFIIH C1-like domain|von Willebrand factor, type A|Zinc finger, C2H2	GO:0006289|GO:0008270|GO:0005675|GO:0006351|GO:0000439		general transcription factor iih subunit 2-like	IPR012170|IPR007198|IPR004595|IPR002035|IPR007087	GO:0000439|GO:0006289|GO:0006351|GO:0006281|GO:0008270|GO:0046872
Dr01941	Cyclic nucleotide-binding domain|Ion transport domain|Potassium channel, voltage-dependent, EAG/ELK/ERG|Cyclic nucleotide-binding-like|RmlC-like jelly roll fold|IQ motif, EF-hand binding site	GO:0005249|GO:0055085|GO:0006813|GO:0008076		cyclic nucleotide-gated ion channel 15-like	IPR000595|IPR005821|IPR018490|IPR014710|IPR003938|IPR000048	GO:0005216|GO:0006811|GO:0016020|GO:0055085|GO:0005249|GO:0006813|GO:0005515
Dr01942	Cytokinin riboside 5'-monophosphate phosphoribohydrolase LOG	GO:0005634|GO:0005829|GO:0016829		protein	IPR005269
Dr01943	Mitochondrial import inner membrane translocase subunit Tim16	GO:0030150|GO:0005744|GO:0005634|GO:0005829		mitochondrial import inner membrane translocase subunit tim16-like	IPR005341	GO:0005744|GO:0030150
Dr01944	Epsin domain, N-terminal|ENTH/VHS|Epsin-like, N-terminal				IPR001026|IPR008942|IPR013809
Dr01945	START domain|Domain of unknown function DUF1336|START-like domain				IPR002913|IPR009769|IPR023393	GO:0008289
Dr01946	AUX/IAA protein|B3 DNA binding domain|Auxin response factor|DNA-binding pseudobarrel domain|Aux/IAA-ARF-dimerisation	GO:0006351|GO:0080090|GO:0048438|GO:0009755|GO:1901700|GO:0048437|GO:0005488|GO:0009733|GO:0031326		auxin response factor 18-like	IPR003311|IPR003340|IPR010525|IPR015300|IPR011525	GO:0005634|GO:0006355|GO:0003677|GO:0009725|GO:0046983
Dr01947	Peptidase M28	GO:0016020		protein	IPR007484	GO:0006508|GO:0008233
Dr01948	Homeodomain-like|SANT/Myb domain|Myb-like domain|Myb domain				IPR009057|IPR001005|IPR017877|IPR017930	GO:0003677|GO:0003682
Dr01949	Peptidase M28	GO:0008233|GO:0016020|GO:0006508		protein	IPR007484	GO:0006508|GO:0008233
Dr01950	Double-stranded RNA-binding domain	GO:0003725		double-stranded rna-binding protein 2-like	IPR014720
Dr01951	Major intrinsic protein|Aquaporin-like	GO:0005773|GO:0009269|GO:0006833|GO:0005886|GO:0006970|GO:0080170|GO:0009737|GO:0016021|GO:0009507|GO:0005215		plasma membrane intrinsic protein	IPR000425|IPR023271	GO:0005215|GO:0006810|GO:0016020
Dr01952	Serine-threonine/tyrosine-protein kinase catalytic domain|Protein kinase-like domain|Concanavalin A-like lectin/glucanase, subgroup|Protein kinase domain|Protein kinase, ATP binding site	GO:0016301		protein kinase family protein	IPR001245|IPR011009|IPR013320|IPR000719|IPR017441	GO:0004672|GO:0006468|GO:0016772|GO:0005524
Dr01953	Zinc finger, CCCH-type|(Uracil-5)-methyltransferase|Methyltransferase domain|Nucleotide-binding, alpha-beta plait	GO:0016740|GO:1901363|GO:0008152|GO:0097159		zinc finger ccch domain-containing protein 24-like	IPR000571|IPR010280|IPR025714|IPR012677	GO:0046872|GO:0006396|GO:0008173|GO:0000166
Dr01954	Patatin/Phospholipase A2-related|Acyl transferase/acyl hydrolase/lysophospholipase	GO:0008152		protein	IPR002641|IPR016035	GO:0006629|GO:0008152
Dr01955	Chorismate synthase|Chorismate synthase, conserved site	GO:0033587|GO:0009423|GO:0004107|GO:0009536|GO:0000162|GO:0006571|GO:0009094	EC:4.2.3.5	chorismate synthase	IPR000453|IPR020541	GO:0004107|GO:0009073	EC:4.2.3.5	KEGG: 00400+4.2.3.5|MetaCyc: PWY-6163|UniPathway: UPA00053
Dr01956	Zinc finger, RING/FYVE/PHD-type|Zinc finger, RING-type	GO:0008270|GO:0005886		e3 ubiquitin-protein ligase mgrn1-like	IPR013083|IPR001841	GO:0005515|GO:0008270
Dr01957
Dr01958	Protein of unknown function DUF1751, integral membrane, eukaryotic|Peptidase S54, rhomboid domain	GO:0016021		transmembrane protein 115-like	IPR013861|IPR022764	GO:0004252|GO:0016021
Dr01959	Phosphoenolpyruvate carboxykinase, ATP-utilising|Phosphoenolpyruvate carboxykinase, N-terminal|Phosphoenolpyruvate carboxykinase, C-terminal	GO:0005829|GO:0005730|GO:0004612|GO:0005524|GO:0016310|GO:0016301|GO:0009817|GO:0006094|GO:0046686|GO:0016036|GO:0016020|GO:0006099|GO:0015976	EC:4.1.1.49	phosphoenolpyruvate carboxykinase	IPR001272|IPR008210|IPR013035	GO:0004612|GO:0005524|GO:0006094|GO:0004611|GO:0017076	EC:4.1.1.49	KEGG: 00010+4.1.1.49|KEGG: 00020+4.1.1.49|KEGG: 00620+4.1.1.49|KEGG: 00710+4.1.1.49|MetaCyc: PWY-561|MetaCyc: PWY-7117|UniPathway: UPA00138|Reactome: REACT_474|UniPathway: UPA00138
Dr01960		GO:0005829|GO:0005730|GO:0004612|GO:0005524|GO:0009817|GO:0006094|GO:0046686|GO:0016036|GO:0016020|GO:0006099|GO:0015976	EC:4.1.1.49	phosphoenolpyruvate carboxykinase
Dr01961	Glycosyl transferase, family 43	GO:0015018|GO:0042285|GO:0005794|GO:0010417|GO:0009834|GO:0016020|GO:0030206	EC:2.4.1.135	beta- -	IPR005027	GO:0015018|GO:0016020
Dr01962	Amidase|Amidase signature domain|Amidase, conserved site	GO:0016811|GO:0043231|GO:0044444|GO:0006807	EC:3.5.1.0	n-acylethanolamine amidohydrolase	IPR000120|IPR023631|IPR020556	GO:0016884	EC:6.3.5.-	KEGG: 00253+6.3.5.-
Dr01963	Histidine phosphatase superfamily, clade-1				IPR013078
Dr01964	Histidine phosphatase superfamily, clade-1				IPR013078
Dr01965	Transposase, MuDR, plant				IPR004332
Dr01966		GO:0003676|GO:0005524|GO:0008026		pre-mrna-splicing factor atp-dependent rna helicase prp16-like
Dr01967
Dr01968	Aminotransferase-like, plant mobile domain				IPR019557
Dr01969
Dr01970	Zinc finger, SWIM-type				IPR007527	GO:0008270
Dr01971	ATP-grasp fold, succinyl-CoA synthetase-type|Succinyl-CoA synthetase-like|ATP-grasp fold, subdomain 2	GO:0006629|GO:0003878|GO:0005524|GO:0004775|GO:0016829|GO:0005829|GO:0019643|GO:0042709	EC:2.3.3.8|EC:6.2.1.5	atp-citrate lyase a-3	IPR013650|IPR016102|IPR013816	GO:0005524	EC:6.2.1.5	KEGG: 00020+6.2.1.5|KEGG: 00640+6.2.1.5|KEGG: 00660+6.2.1.5|KEGG: 00720+6.2.1.5|MetaCyc: PWY-5392|MetaCyc: PWY-5537|MetaCyc: PWY-5538|MetaCyc: PWY-5690|MetaCyc: PWY-5913|MetaCyc: PWY-6728|MetaCyc: PWY-6969|UniPathway: UPA00223
Dr01972	Methyltransferase type 11				IPR013216	GO:0008152|GO:0008168
Dr01973	IQ motif, EF-hand binding site|CG-1 DNA-binding domain|Ankyrin repeat-containing domain|P-loop containing nucleoside triphosphate hydrolase|Immunoglobulin E-set|Immunoglobulin-like fold|Ankyrin repeat				IPR000048|IPR005559|IPR020683|IPR027417|IPR014756|IPR013783|IPR002110	GO:0005515|GO:0003677|GO:0005634
Dr01974	BAT2, N-terminal				IPR009738
Dr01975	Ribosomal protein S27a|Zinc-binding ribosomal protein	GO:0003735|GO:0022627|GO:0006412|GO:0042254		ubiquitin extension protein	IPR002906|IPR011332	GO:0003735|GO:0005622|GO:0005840|GO:0006412
Dr01976	RmlC-like jelly roll fold				IPR014710
Dr01977	Cupin 1|Germin|RmlC-like cupin domain|RmlC-like jelly roll fold|Germin, manganese binding site	GO:0005576|GO:0046872|GO:0016491		germin-like protein	IPR006045|IPR011051|IPR014710|IPR001929|IPR019780	GO:0045735|GO:0030145
Dr01978	Cupin 1|Germin|RmlC-like cupin domain|RmlC-like jelly roll fold|Germin, manganese binding site				IPR006045|IPR011051|IPR014710|IPR001929|IPR019780	GO:0045735|GO:0030145
Dr01979	Cupin 1|Germin|RmlC-like cupin domain|RmlC-like jelly roll fold|Germin, manganese binding site	GO:0005576|GO:0046872|GO:0016491		germin-like protein 9-3	IPR006045|IPR011051|IPR014710|IPR001929|IPR019780	GO:0045735|GO:0030145
Dr01980	Short-chain dehydrogenase/reductase SDR|Glucose/ribitol dehydrogenase|NAD(P)-binding domain|Short-chain dehydrogenase/reductase, conserved site	GO:0008152|GO:0016491|GO:0005488		momilactone a synthase-like	IPR016040|IPR002198|IPR002347|IPR020904	GO:0008152|GO:0016491
Dr01981	Short-chain dehydrogenase/reductase SDR|Glucose/ribitol dehydrogenase|NAD(P)-binding domain|Short-chain dehydrogenase/reductase, conserved site	GO:0008152|GO:0016491|GO:0005488		momilactone a synthase-like	IPR016040|IPR002198|IPR002347|IPR020904	GO:0008152|GO:0016491
Dr01982	Short-chain dehydrogenase/reductase SDR|Glucose/ribitol dehydrogenase|NAD(P)-binding domain	GO:0008152|GO:0016491|GO:0005488		3-beta hydroxysteroid dehydrogenase	IPR002198|IPR016040|IPR002347	GO:0008152|GO:0016491
Dr01983	YTH domain				IPR007275
Dr01984
Dr01985	Complex 1 LYR protein				IPR008011
Dr01986	Peptidase C15, pyroglutamyl peptidase I-like|Peptidase C15, pyroglutamyl peptidase I	GO:0016787|GO:0006508		pyrrolidone-carboxylate peptidase family expressed	IPR016125|IPR000816	GO:0006508
Dr01987	Protein kinase domain|Protein kinase-like domain|Serine/threonine- / dual specificity protein kinase, catalytic domain|Protein kinase, ATP binding site|Serine/threonine-protein kinase, active site	GO:0050321|GO:0006468|GO:0005524|GO:0009933|GO:0005829|GO:0004674|GO:0009069	EC:2.7.11.26|EC:2.7.11.0	protein	IPR000719|IPR011009|IPR002290|IPR017441|IPR008271	GO:0004672|GO:0005524|GO:0006468|GO:0016772|GO:0004674
Dr01988	Tetratricopeptide TPR2|Tetratricopeptide-like helical|Tetratricopeptide repeat|Tetratricopeptide repeat-containing domain				IPR013105|IPR011990|IPR019734|IPR013026	GO:0005515
Dr01989	Chaperonin Cpn60/TCP-1|Chaperone tailless complex polypeptide 1 (TCP-1)|GroEL-like apical domain|GroEL-like equatorial domain|TCP-1-like chaperonin intermediate domain|T-complex protein 1, beta subunit|Chaperonin TCP-1, conserved site	GO:0005737|GO:0006457|GO:0046658|GO:0005618|GO:0005524|GO:0051082		t-complex protein 1 subunit beta	IPR002423|IPR027409|IPR027413|IPR027410|IPR017998|IPR012716|IPR002194	GO:0005524|GO:0044267|GO:0006457|GO:0051082		Reactome: REACT_17015
Dr01990	Glycosyl hydrolase family 100|Six-hairpin glycosidase-like	GO:0004575|GO:0005739|GO:0033926|GO:0005982|GO:0005985|GO:0017177	EC:3.2.1.26|EC:3.2.1.48|EC:3.2.1.97	neutral invertase	IPR024746|IPR008928	GO:0033926|GO:0003824	EC:3.2.1.26	KEGG: 00052+3.2.1.26|KEGG: 00500+3.2.1.26|MetaCyc: PWY-621
Dr01991	Peptidase S10, serine carboxypeptidase|Peptidase S10, serine carboxypeptidase, active site	GO:0004180		grain size 5	IPR001563|IPR018202	GO:0004185|GO:0006508
Dr01992	Protein of unknown function DUF490	GO:0009536		embryo defective 2410 protein	IPR007452
Dr01993	DnaJ domain|DnaJ domain, conserved site	GO:0016020		chaperone protein dnaj	IPR001623|IPR018253
Dr01994	Rhodanese-like domain|Serine hydrolase FSH				IPR001763|IPR005645
Dr01995	Helicase, C-terminal|Helicase-associated domain|Domain of unknown function DUF1605|P-loop containing nucleoside triphosphate hydrolase|Helicase, superfamily 1/2, ATP-binding domain	GO:0005730|GO:0009941|GO:0008026|GO:0003676|GO:0005524|GO:0016020		pre-mrna-splicing factor atp-dependent rna helicase	IPR001650|IPR007502|IPR011709|IPR027417|IPR014001	GO:0003676|GO:0004386|GO:0005524
Dr01996	Uncharacterised protein family, ATP binding|P-loop containing nucleoside triphosphate hydrolase	GO:0044763|GO:0032555|GO:0035639|GO:0032550		xpa-binding protein 1	IPR004130|IPR027417	GO:0000166
Dr01997
Dr01998	Serine/threonine-protein kinase CTR1/EDR1|Serine-threonine/tyrosine-protein kinase catalytic domain|PAS domain|Protein kinase-like domain|Serine/threonine- / dual specificity protein kinase, catalytic domain|Protein kinase domain|Serine/threonine-protein kinase, active site	GO:0044238|GO:0004672|GO:0044260|GO:0016310|GO:0007165		pas domain-containing protein tyrosine kinase	IPR028324|IPR001245|IPR000014|IPR011009|IPR002290|IPR000719|IPR008271	GO:0004672|GO:0006468|GO:0004871|GO:0007165|GO:0016772|GO:0005524|GO:0004674
[truncated: 24,200 more rows]
