# Supplementary material for: Genome sequencing of the staple food crop white Guinea yam enables the development of a molecular marker for sex determination
Source: BMC Biol. 2017 Sep 19;15:86. doi: 10.1186/s12915-017-0419-x (PMC5604175; doi:10.1186/s12915-017-0419-x)
Supplement: Supplementary file 5 — Functional annotation of D. rotundata genes conserved between D. rotundata and at least one other angiosperm (A. thaliana, B. distachyon, and O. sativa). (XLSX 639 kb) [file 12915_2017_419_MOESM5_ESM.xlsx]

## Sheet:  Supplemental dataset S3
Additional file 5: Supplemental dataset S3. Functional annotation of D. rotundata genes conserved between D. rotundata and at least one other angiosperm (A. thaliana, B. distachyon and O. sativa).
Gene_ID	Blast2GO_GO_term	Blast2GO_EC_Number	Blast2GO_GO_Description	Interproscan_IPR	Interproscan_IPR_Description	Interproscan_GO_term	Interproscan_EC_Number	Interproscan_Pathways
Dr14390	NULL	NULL	NULL	IPR000008	C2 domain	GO:0005515	NULL	NULL
Dr14427	GO:0015439|GO:0009536|GO:0006200|GO:0005524|GO:0005886|GO:0015886	EC:3.6.3.41	atp-binding cassette transporter	IPR003439|IPR027417|IPR003593|IPR017871	ABC transporter-like|P-loop containing nucleoside triphosphate hydrolase|AAA+ ATPase domain|ABC transporter, conserved site	GO:0005524|GO:0016887|GO:0000166|GO:0017111	NULL	NULL
Dr14340	GO:0009987|GO:0050896|GO:0009536|GO:0008152|GO:0003824	NULL	saur family protein	IPR003676	Auxin-induced protein, ARG7	NULL	NULL	NULL
Dr14361	GO:0016772	NULL	meiotically up-regulated gene 71	IPR006175|IPR002761|IPR013813|IPR014729	YjgF/Yer057p/UK114 family|DUF71 domain|Endoribonuclease L-PSP/chorismate mutase-like|Rossmann-like alpha/beta/alpha sandwich fold	NULL	NULL	MetaCyc: PWY-6482|UniPathway: UPA00559
Dr14395	GO:0044249|GO:0044238|GO:0044260|GO:0044424	NULL	protein	IPR002728|IPR016435	Diphthamide synthesis, DPH1/DPH2|Diphthamide synthesis, eukaryotic DPH1/archaeal DPH2	GO:0005737|GO:0017183	NULL	UniPathway: UPA00559
Dr14492	GO:0010208|GO:0006075|GO:0000148|GO:0009556|GO:0080092|GO:0003843|GO:0009846|GO:0030170|GO:0005982|GO:0005985	EC:2.4.1.34	callose synthase 5-like	IPR026953|IPR003440|IPR026899|IPR023175	Callose synthase|Glycosyl transferase, family 48|1,3-beta-glucan synthase subunit FKS1-like, domain-1|Vacuolar protein sorting-associate protein Vta1/Callose synthase, N-terminal domain	GO:0003843|GO:0000148|GO:0006075|GO:0016020	EC:2.4.1.34	KEGG: 00500+2.4.1.34|MetaCyc: PWY-6773
Dr14518	GO:0004672|GO:0016023|GO:0000166|GO:0016310|GO:0016787	NULL	receptor-like protein kinase	IPR001611|IPR001245|IPR011009|IPR013320|IPR003591|IPR000719	Leucine-rich repeat|Serine-threonine/tyrosine-protein kinase catalytic domain|Protein kinase-like domain|Concanavalin A-like lectin/glucanase, subgroup|Leucine-rich repeat, typical subtype|Protein kinase domain	GO:0005515|GO:0004672|GO:0006468|GO:0016772|GO:0005524	NULL	NULL
Dr14532	NULL	NULL	NULL	IPR002885|IPR011990	Pentatricopeptide repeat|Tetratricopeptide-like helical	GO:0005515	NULL	NULL
Dr14541	GO:0046509|GO:0010027|GO:0019375|GO:0009706|GO:0030246|GO:0030259|GO:0009790|GO:0046486	EC:2.4.1.46	mgdg synthase type a	IPR009695	Diacylglycerol glucosyltransferase, N-terminal	GO:0009247|GO:0016758	NULL	NULL
Dr14507	NULL	NULL	NULL	IPR006735|IPR027799	Protein of unknown function DUF602|Replication termination factor 2, RING-finger	NULL	NULL	NULL
Dr14526	GO:0005739	NULL	uncharacterized protein	NULL	NULL	NULL	NULL	NULL
Dr14555	NULL	NULL	NULL	IPR001841|IPR013083	Zinc finger, RING-type|Zinc finger, RING/FYVE/PHD-type	GO:0005515|GO:0008270	NULL	NULL
Dr14569	GO:0016020	NULL	vacuolar amino acid transporter 1-like	IPR013057	Amino acid transporter, transmembrane	NULL	NULL	NULL
Dr14570	NULL	NULL	NULL	IPR027417	P-loop containing nucleoside triphosphate hydrolase	NULL	NULL	NULL
Dr14589	GO:0009570	NULL	uncharacterized protein	IPR011990	Tetratricopeptide-like helical	GO:0005515	NULL	NULL
Dr14611	GO:0008152|GO:0005739|GO:0008409|GO:0003677	NULL	5 -3 exonuclease-like protein	IPR020045|IPR020046|IPR008918|IPR002421	5'-3' exonuclease, C-terminal domain|5'-3' exonuclease, alpha-helical arch, N-terminal|Helix-hairpin-helix motif, class 2|5'-3' exonuclease, N-terminal	GO:0003677|GO:0003824|GO:0008409	NULL	NULL
Dr14590	GO:0044464	NULL	serine-threonine protein plant-	IPR001611|IPR013210|IPR003591	Leucine-rich repeat|Leucine-rich repeat-containing N-terminal, type 2|Leucine-rich repeat, typical subtype	GO:0005515	NULL	NULL
Dr14604	GO:0016020|GO:0005739	NULL	uncharacterized protein	IPR008470	Uncharacterised protein family Ycf33	NULL	NULL	NULL
Dr14606	NULL	NULL	NULL	NULL	NULL	NULL	NULL	NULL
Dr14628	GO:0044260|GO:0090304|GO:1901363|GO:0097159	NULL	dna mismatch repair protein	IPR002099|IPR014790|IPR003594	DNA mismatch repair protein|MutL, C-terminal, dimerisation|Histidine kinase-like ATPase, ATP-binding domain	GO:0005524|GO:0006298|GO:0030983	NULL	NULL
Dr14646	NULL	NULL	NULL	IPR002528	Multi antimicrobial extrusion protein	GO:0006855|GO:0015238|GO:0015297|GO:0016020|GO:0055085	NULL	Reactome: REACT_15518|Reactome: REACT_20633
Dr14658	GO:0043167|GO:0005739	NULL	gtp-binding protein	IPR016496|IPR006073|IPR027417	GTPase HflX|GTP binding domain|P-loop containing nucleoside triphosphate hydrolase	GO:0005525	NULL	NULL
Dr14660	GO:0051920|GO:0004601|GO:0055114|GO:0009570|GO:0006804|GO:0006979	EC:1.11.1.15|EC:1.11.1.7	upf0308 protein chloroplastic-like	IPR012336	Thioredoxin-like fold	NULL	NULL	NULL
Dr14684	GO:0016772|GO:0043231|GO:0044444	NULL	brassinosteroid insensitive 1-associated receptor kinase 1	IPR001245|IPR011009|IPR013320|IPR000719|IPR008266	Serine-threonine/tyrosine-protein kinase catalytic domain|Protein kinase-like domain|Concanavalin A-like lectin/glucanase, subgroup|Protein kinase domain|Tyrosine-protein kinase, active site	GO:0004672|GO:0006468|GO:0016772|GO:0005524|GO:0004713	NULL	NULL
Dr14700	GO:0003723|GO:0009409|GO:0008026|GO:0009408|GO:0008186|GO:0005524|GO:0009737|GO:0005635|GO:0005737|GO:0016973|GO:0005886	NULL	dead-box atp-dependent rna helicase 38-like	IPR011545|IPR001650|IPR027417|IPR014001|IPR014014	DNA/RNA helicase, DEAD/DEAH box type, N-terminal|Helicase, C-terminal|P-loop containing nucleoside triphosphate hydrolase|Helicase, superfamily 1/2, ATP-binding domain|RNA helicase, DEAD-box type, Q motif	GO:0003676|GO:0005524|GO:0008026|GO:0004386	NULL	NULL
Dr14756	NULL	NULL	NULL	IPR016159	Cullin repeat-like-containing domain	NULL	NULL	NULL
Dr14758	NULL	NULL	NULL	IPR011687	P60-like	NULL	NULL	NULL
Dr14748	NULL	NULL	NULL	IPR006476	Conserved hypothetical protein CHP01589, plant	NULL	NULL	NULL
Dr14767	GO:0009826|GO:0006813|GO:0016020	NULL	probable potassium transporter 13-like	IPR003855	K+ potassium transporter	GO:0015079|GO:0016020|GO:0071805	NULL	NULL
Dr14847	NULL	NULL	NULL	IPR002885|IPR011990	Pentatricopeptide repeat|Tetratricopeptide-like helical	GO:0005515	NULL	NULL
Dr14873	GO:0019200|GO:0016773|GO:0008152|GO:0005739|GO:0000166	EC:2.7.1.0	arabinose kinase	IPR006204|IPR019539|IPR020568|IPR014721|IPR006206	GHMP kinase N-terminal domain|Galactokinase galactose-binding domain|Mevalonate/galactokinase|Ribosomal protein S5 domain 2-type fold|Ribosomal protein S5 domain 2-type fold, subgroup	GO:0005524|GO:0005737|GO:0008152|GO:0016301|GO:0016773	EC:2.7.1.6	KEGG: 00052+2.7.1.6|KEGG: 00520+2.7.1.6|MetaCyc: PWY-3821|MetaCyc: PWY-6317|MetaCyc: PWY-6527|UniPathway: UPA00214
Dr14901	NULL	NULL	NULL	IPR007872	Zinc finger, DPH-type	NULL	NULL	UniPathway: UPA00559
Dr14904	GO:0005739|GO:0009536	NULL	fiber protein fb15	IPR019344	Mitochondrial F1-F0 ATP synthase subunit F, predicted	NULL	NULL	NULL
Dr14922	NULL	NULL	NULL	IPR010301	Nucleolar, Nop52	GO:0006364|GO:0030688	NULL	NULL
Dr02989	GO:1901700|GO:0050794|GO:0008152|GO:0006950	NULL	transcription factor myc2-like	IPR011598|IPR025610	Myc-type, basic helix-loop-helix (bHLH) domain|Transcription factor MYC/MYB N-terminal	GO:0046983	NULL	NULL
Dr03000	GO:0008270|GO:0005622	NULL	palmate-like pentafoliata 1 transcription factor	IPR013087|IPR015880|IPR007087	Zinc finger C2H2-type/integrase DNA-binding domain|Zinc finger, C2H2-like|Zinc finger, C2H2	GO:0003676|GO:0046872	NULL	NULL
Dr02907	GO:0043231|GO:0044444	NULL	tsl-kinase interacting protein 1	IPR009057|IPR001005|IPR017884	Homeodomain-like|SANT/Myb domain|SANT domain	GO:0003677|GO:0003682	NULL	NULL
Dr02930	NULL	NULL	NULL	IPR001461|IPR021109|IPR001969	Aspartic peptidase|Aspartic peptidase domain|Aspartic peptidase, active site	GO:0004190|GO:0006508	NULL	NULL
Dr02939	GO:0005525|GO:0009737|GO:0051020|GO:0016020|GO:0010228|GO:0010427	NULL	gpcr-type g protein 1	IPR015672|IPR025969|IPR022535	GPCR 89-related|Abscisic acid G-protein coupled receptor-like domain|Golgi pH regulator, conserved domain	NULL	NULL	NULL
Dr02960	GO:0016020|GO:0016023|GO:0009941	NULL	membrane protein	IPR007300	CidB/LrgB family	NULL	NULL	NULL
Dr02964	GO:0005777|GO:0009414|GO:0009651|GO:0006098|GO:0009409|GO:0009737|GO:0019521|GO:0004616|GO:0050661	EC:1.1.1.44	6-phosphogluconate dehydrogenase	IPR006114|IPR006115|IPR008927|IPR013328|IPR012284|IPR016040|IPR006113	6-phosphogluconate dehydrogenase, C-terminal|6-phosphogluconate dehydrogenase, NADP-binding|6-phosphogluconate dehydrogenase, C-terminal-like|Dehydrogenase, multihelical|Fibritin/6-phosphogluconate dehydrogenase, C-terminal extension|NAD(P)-binding domain|6-phosphogluconate dehydrogenase, decarboxylating	GO:0004616|GO:0006098|GO:0050661|GO:0055114|GO:0016491|GO:0016616|GO:0050662	EC:1.1.1.44	KEGG: 00030+1.1.1.44|KEGG: 00480+1.1.1.44|UniPathway: UPA00115
Dr02966	NULL	NULL	NULL	IPR024593|IPR001623	Domain of unknown function DUF3444|DnaJ domain	NULL	NULL	NULL
Dr03023	GO:0016020|GO:0016023|GO:0016740	NULL	udp-n-acetylglucosamine transferase subunit alg14 homolog	IPR013969	Oligosaccharide biosynthesis protein Alg14-like	NULL	NULL	NULL
Dr03029	GO:0016020	NULL	gpi transamidase subunit pig-u	IPR009600	GPI transamidase subunit PIG-U	GO:0005789|GO:0006506|GO:0016021	NULL	UniPathway: UPA00196
Dr03013	GO:0009156|GO:0009165|GO:0009116|GO:0005524|GO:0000287|GO:0016310|GO:0016301|GO:0004749|GO:0009507|GO:0006098|GO:0006144	EC:2.7.6.1	ribose-phosphate pyrophosphokinase chloroplastic-like	IPR005946	Ribose-phosphate diphosphokinase	GO:0000287|GO:0004749|GO:0009165	EC:2.7.6.1	KEGG: 00030+2.7.6.1|KEGG: 00230+2.7.6.1|UniPathway: UPA00087
Dr03051	GO:1901137|GO:0034645|GO:0006464|GO:0016757|GO:0016020	NULL	alpha- -mannosyltransferase	IPR005599	GPI mannosyltransferase	GO:0016757	NULL	NULL
Dr03071	GO:0044260|GO:0090304|GO:0016740|GO:0010467	NULL	dna-directed rna polymerase ii subunit rpb4	IPR005574|IPR010997	RNA polymerase II, Rpb4|HRDC-like	GO:0003899|GO:0006351|GO:0000166|GO:0003824|GO:0044237	NULL	NULL
Dr03102	GO:0009941|GO:0000166|GO:0015078|GO:0042742|GO:0016021|GO:0015986|GO:0045263|GO:0009535	NULL	protein	IPR002146	ATPase, F0 complex, subunit B/B', bacterial/chloroplast	GO:0015078|GO:0015986|GO:0045263	NULL	NULL
Dr03103	GO:0030246|GO:0005975|GO:0016853	NULL	embryo defective 2016 protein	IPR026736|IPR000644|IPR001347|IPR004800	Protein virilizer|CBS domain|Sugar isomerase (SIS)|Phosphosugar isomerase, KdsD/KpsF-type	GO:0030554|GO:0005975|GO:0030246|GO:0016853	NULL	Reactome: REACT_17015
Dr03105	GO:0016023	NULL	uncharacterized protein at4g06744 precursor	IPR001611	Leucine-rich repeat	GO:0005515	NULL	NULL
Dr03133	NULL	NULL	NULL	IPR009097	RNA ligase/cyclic nucleotide phosphodiesterase	GO:0003824	NULL	NULL
Dr03138	NULL	NULL	NULL	NULL	NULL	NULL	NULL	NULL
Dr03160	GO:0008610|GO:0044255|GO:0004672|GO:0043167|GO:0050896|GO:0044249	NULL	malonyl- decarboxylase	IPR007956|IPR013137	Malonyl-CoA decarboxylase|Zinc finger, TFIIB-type	GO:0006633|GO:0050080	EC:4.1.1.9	KEGG: 00410+4.1.1.9|KEGG: 00640+4.1.1.9|MetaCyc: PWY-5810|UniPathway: UPA00340|Reactome: REACT_1788
Dr03178	NULL	NULL	NULL	IPR006904	Protein of unknown function DUF716, TMEM45	NULL	NULL	NULL
Dr03182	GO:0005773|GO:0016491|GO:0055114|GO:0010181	NULL	protein creg1	IPR012349	FMN-binding split barrel	GO:0010181|GO:0016491|GO:0055114	NULL	NULL
Dr03210	GO:0009536	NULL	pentatricopeptide repeat-containing protein	IPR002885|IPR011990	Pentatricopeptide repeat|Tetratricopeptide-like helical	GO:0005515	NULL	NULL
Dr03179	GO:0005739	NULL	uncharacterized protein	NULL	NULL	NULL	NULL	NULL
Dr03186	GO:0016023	NULL	uncharacterized protein	NULL	NULL	NULL	NULL	NULL
Dr03222	GO:0005488|GO:0005739|GO:0009536	NULL	pathogenesis-related homeodomain protein	IPR009057|IPR001356	Homeodomain-like|Homeobox domain	GO:0003677|GO:0003700|GO:0006355|GO:0043565	NULL	NULL
Dr03243	GO:0005739	NULL	protein	IPR004140|IPR016159	Exocyst complex protein Exo70|Cullin repeat-like-containing domain	GO:0000145|GO:0006887	NULL	NULL
Dr03246	NULL	NULL	NULL	IPR009769	Domain of unknown function DUF1336	NULL	NULL	NULL
Dr03257	NULL	NULL	NULL	IPR024738	Transcriptional coactivator Hfi1/Transcriptional adapter 1	GO:0070461	NULL	NULL
Dr03262	NULL	NULL	NULL	IPR002885|IPR011990	Pentatricopeptide repeat|Tetratricopeptide-like helical	GO:0005515	NULL	NULL
Dr03344	GO:0009536	NULL	pentatricopeptide repeat-containing protein	IPR002885|IPR011990	Pentatricopeptide repeat|Tetratricopeptide-like helical	GO:0005515	NULL	NULL
Dr03305	NULL	NULL	NULL	IPR001841|IPR013083	Zinc finger, RING-type|Zinc finger, RING/FYVE/PHD-type	GO:0005515|GO:0008270	NULL	NULL
Dr03369	GO:0050896|GO:0016310|GO:0004674|GO:0000166|GO:0009069	EC:2.7.11.0	cbl-interacting protein kinase	IPR020636|IPR000719|IPR004041|IPR011009|IPR002290|IPR018451|IPR017441|IPR008271	Calcium/calmodulin-dependent/calcium-dependent protein kinase|Protein kinase domain|NAF domain|Protein kinase-like domain|Serine/threonine- / dual specificity protein kinase, catalytic domain|NAF/FISL domain|Protein kinase, ATP binding site|Serine/threonine-protein kinase, active site	GO:0004672|GO:0005524|GO:0006468|GO:0007165|GO:0016772|GO:0004674	NULL	NULL
Dr03371	NULL	NULL	NULL	IPR011598	Myc-type, basic helix-loop-helix (bHLH) domain	GO:0046983	NULL	NULL
Dr03376	GO:0003676|GO:0005634|GO:0004535|GO:0051252	EC:3.1.13.4	protein	IPR006941|IPR012337	Ribonuclease CAF1|Ribonuclease H-like domain	GO:0005634|GO:0003676	NULL	NULL
Dr03382	GO:0008233|GO:0017111|GO:0010498|GO:0008540|GO:0009553|GO:0005524|GO:0010255|GO:0009555|GO:0005737|GO:0005634|GO:0005886	EC:3.6.1.15	26s protease regulatory subunit 6a-like protein	IPR003959|IPR027417|IPR003593|IPR005937|IPR003960	ATPase, AAA-type, core|P-loop containing nucleoside triphosphate hydrolase|AAA+ ATPase domain|26S proteasome subunit P45|ATPase, AAA-type, conserved site	GO:0005524|GO:0000166|GO:0017111|GO:0005737|GO:0016787|GO:0030163	NULL	Reactome: REACT_11045|Reactome: REACT_13|Reactome: REACT_13635|Reactome: REACT_152|Reactome: REACT_1538|Reactome: REACT_383|Reactome: REACT_578|Reactome: REACT_6185|Reactome: REACT_6850
Dr03320	GO:0005975|GO:0050379|GO:0050378|GO:0050662|GO:0000166|GO:0009117	EC:5.1.3.12|EC:5.1.3.6	protein	IPR001509|IPR016040|IPR008089	NAD-dependent epimerase/dehydratase|Nucleotide sugar epimerase|NAD(P)-binding domain	GO:0003824|GO:0044237|GO:0050662|GO:0005975|GO:0016857	NULL	NULL
Dr03395	NULL	NULL	NULL	IPR000626|IPR019956|IPR019955	Ubiquitin domain|Ubiquitin|Ubiquitin supergroup	GO:0005515	NULL	NULL
Dr03424	GO:0005739	NULL	escrt-ii complex subunit vps22	IPR007286|IPR011991	EAP30|Winged helix-turn-helix DNA-binding domain	NULL	NULL	NULL
Dr03441	GO:0005739|GO:0009536	NULL	armadillo beta-catenin-like repeat-containing protein	IPR016024|IPR011989	Armadillo-type fold|Armadillo-like helical	GO:0005488	NULL	NULL
Dr03448	GO:0055085|GO:0043231|GO:0044444|GO:0016020	NULL	ca2+ antiporter cation exchanger	IPR004837	Sodium/calcium exchanger membrane region	GO:0016021|GO:0055085	NULL	Reactome: REACT_15518
Dr03386	GO:0004069|GO:0006103|GO:0009409|GO:0009941|GO:0080130|GO:0006536|GO:0009570|GO:0005759|GO:0046686|GO:0030170|GO:0006531|GO:0010319|GO:0048046|GO:0000162|GO:0006107|GO:0006522|GO:0006525|GO:0006534|GO:0006560|GO:0006571|GO:0009094|GO:0009821|GO:0015976	EC:2.6.1.1	aspartate aminotransferase	IPR000796|IPR004839|IPR015424|IPR015421|IPR015422|IPR004838	Aspartate/other aminotransferase|Aminotransferase, class I/classII|Pyridoxal phosphate-dependent transferase|Pyridoxal phosphate-dependent transferase, major region, subdomain 1|Pyridoxal phosphate-dependent transferase, major region, subdomain 2|Aminotransferases, class-I, pyridoxal-phosphate-binding site	GO:0006520|GO:0008483|GO:0009058|GO:0030170|GO:0003824	EC:2.6.1.1	KEGG: 00250+2.6.1.1|KEGG: 00270+2.6.1.1|KEGG: 00330+2.6.1.1|KEGG: 00350+2.6.1.1|KEGG: 00360+2.6.1.1|KEGG: 00400+2.6.1.1|KEGG: 00401+2.6.1.1|KEGG: 00710+2.6.1.1|KEGG: 00950+2.6.1.1|KEGG: 00960+2.6.1.1|MetaCyc: PWY-5913|MetaCyc: PWY-6318|MetaCyc: PWY-6638|MetaCyc: PWY-6642|MetaCyc: PWY-6643|MetaCyc: PWY-7115|MetaCyc: PWY-7117|Reactome: REACT_13
Dr03388	GO:0005618|GO:0005739|GO:0006435|GO:0004829|GO:0005524|GO:0009507|GO:0005886|GO:0006544|GO:0006563|GO:0006566	EC:6.1.1.3	threonyl-trna synthetase	IPR002314|IPR004095|IPR004154|IPR012947|IPR018163|IPR012676|IPR012675|IPR002320|IPR006195	Aminoacyl-tRNA synthetase, class II (G/ H/ P/ S), conserved domain|TGS|Anticodon-binding|Threonyl/alanyl tRNA synthetase, SAD|Threonine-tRNA ligase, class IIa|Threonyl/alanyl tRNA synthetase, class II-like, putative editing domain|TGS-like|Beta-grasp domain|Aminoacyl-tRNA synthetase, class II	GO:0000166|GO:0004812|GO:0005524|GO:0006418|GO:0016876|GO:0043039|GO:0004829|GO:0005737|GO:0006435	EC:6.1.1.3	Reactome: REACT_71|KEGG: 00970+6.1.1.3
Dr03492	GO:0044765|GO:0016020|GO:0009536	NULL	k+ efflux antiporter 3	IPR006153|IPR003148|IPR016040	Cation/H+ exchanger|Regulator of K+ conductance, N-terminal|NAD(P)-binding domain	GO:0006812|GO:0015299|GO:0016021|GO:0055085|GO:0006813	NULL	NULL
Dr03483	GO:0008270	NULL	protein	IPR001841|IPR013083	Zinc finger, RING-type|Zinc finger, RING/FYVE/PHD-type	GO:0005515|GO:0008270	NULL	NULL
Dr03544	NULL	NULL	NULL	NULL	NULL	NULL	NULL	NULL
Dr03694	NULL	NULL	NULL	IPR002885|IPR011990	Pentatricopeptide repeat|Tetratricopeptide-like helical	GO:0005515	NULL	NULL
Dr03723	GO:0016874	NULL	u-box domain-containing protein	IPR003613|IPR016024|IPR011989|IPR013083	U box domain|Armadillo-type fold|Armadillo-like helical|Zinc finger, RING/FYVE/PHD-type	GO:0000151|GO:0004842|GO:0016567|GO:0005488	NULL	NULL
Dr03728	NULL	NULL	NULL	NULL	NULL	NULL	NULL	NULL
Dr03564	GO:0046873|GO:0009507|GO:0016020|GO:0030001	NULL	magnesium transporter mrs2- chloroplastic-like	IPR026573	Magnesium transporter MRS2/LPE10	GO:0015095|GO:0015693	NULL	NULL
Dr03654	NULL	NULL	NULL	IPR011598	Myc-type, basic helix-loop-helix (bHLH) domain	GO:0046983	NULL	NULL
Dr03570	GO:0009536	NULL	protein	IPR018962	Domain of unknown function DUF1995	NULL	NULL	NULL
Dr03689	NULL	NULL	NULL	IPR016024|IPR011989|IPR000225	Armadillo-type fold|Armadillo-like helical|Armadillo	GO:0005488|GO:0005515	NULL	NULL
Dr03703	NULL	NULL	NULL	NULL	NULL	NULL	NULL	NULL
Dr03717	GO:0016023	NULL	cell wall	NULL	NULL	NULL	NULL	NULL
Dr03567	GO:0016020	NULL	organic cation transporter	IPR005828|IPR016196|IPR020846	General substrate transporter|Major facilitator superfamily domain, general substrate transporter|Major facilitator superfamily domain	GO:0016021|GO:0022857|GO:0055085	NULL	NULL
Dr14969	GO:0016020	NULL	nitrate and chloride transporter	IPR010658|IPR011701|IPR016196	Nodulin-like|Major facilitator superfamily|Major facilitator superfamily domain, general substrate transporter	GO:0016021|GO:0055085	NULL	NULL
Dr14954	GO:0032259|GO:0005739|GO:0008168	EC:2.1.1.0	s-adenosylmethionine-dependent methyltransferase domain-containing protein	IPR013216	Methyltransferase type 11	GO:0008152|GO:0008168	NULL	NULL
Dr14948	GO:0006468|GO:0005524|GO:0004674|GO:0009069	EC:2.7.11.0	protein kinase	IPR001245|IPR011009|IPR000719	Serine-threonine/tyrosine-protein kinase catalytic domain|Protein kinase-like domain|Protein kinase domain	GO:0004672|GO:0006468|GO:0016772|GO:0005524	NULL	NULL
Dr15001	GO:0044464	NULL	uncharacterized protein loc100249621	IPR009060|IPR015940	UBA-like|Ubiquitin-associated/translation elongation factor EF1B, N-terminal, eukaryote	GO:0005515	NULL	NULL
Dr15037	GO:0009536	NULL	pentatricopeptide repeat-containing protein	IPR002885|IPR011990|IPR002625	Pentatricopeptide repeat|Tetratricopeptide-like helical|Smr protein/MutS2 C-terminal	GO:0005515	NULL	NULL
Dr15040	NULL	NULL	NULL	NULL	NULL	NULL	NULL	NULL
Dr15054	NULL	NULL	NULL	NULL	NULL	NULL	NULL	NULL
Dr15086	GO:0043231	NULL	origin recognition complex subunit	IPR020795	Origin recognition complex, subunit 3	GO:0003677|GO:0005664|GO:0006260	NULL	NULL
Dr15093	GO:0004828|GO:0005739|GO:0006434|GO:0048481|GO:0005524|GO:0009507|GO:0006544|GO:0006563|GO:0006566	EC:6.1.1.11	seryl-trna synthetase	IPR002317|IPR002314|IPR015866|IPR010978|IPR006195	Serine-tRNA ligase, type1|Aminoacyl-tRNA synthetase, class II (G/ H/ P/ S), conserved domain|Serine-tRNA synthetase, type1, N-terminal|tRNA-binding arm|Aminoacyl-tRNA synthetase, class II	GO:0000166|GO:0004828|GO:0005524|GO:0005737|GO:0006434|GO:0004812|GO:0006418	EC:6.1.1.11	KEGG: 00970+6.1.1.11|MetaCyc: PWY-6281|Reactome: REACT_71|UniPathway: UPA00906|Reactome: REACT_71|KEGG: 00970+6.1.1.11|MetaCyc: PWY-6281|UniPathway: UPA00906
Dr15127	GO:0043231	NULL	gras family transcription factor	IPR005202	Transcription factor GRAS	NULL	NULL	NULL
Dr15190	GO:0006281|GO:0003676|GO:0007049|GO:0043167|GO:0000166|GO:0016787	NULL	rad54-like protein	IPR000330|IPR001650|IPR027417|IPR014001	SNF2-related|Helicase, C-terminal|P-loop containing nucleoside triphosphate hydrolase|Helicase, superfamily 1/2, ATP-binding domain	GO:0003677|GO:0005524|GO:0003676|GO:0004386	NULL	NULL
Dr15192	NULL	NULL	NULL	NULL	NULL	NULL	NULL	NULL
Dr15231	NULL	NULL	NULL	NULL	NULL	NULL	NULL	NULL
Dr15267	GO:0016023|GO:0016020	NULL	fiber protein fb34	IPR009606	Protein of unknown function DUF1218	NULL	NULL	NULL
Dr15345	NULL	NULL	NULL	NULL	NULL	NULL	NULL	NULL
Dr15313	NULL	NULL	NULL	NULL	NULL	NULL	NULL	NULL
Dr24883	NULL	NULL	NULL	IPR008889	VQ	NULL	NULL	NULL
Dr15374	NULL	NULL	NULL	IPR011598	Myc-type, basic helix-loop-helix (bHLH) domain	GO:0046983	NULL	NULL
Dr15409	NULL	NULL	NULL	IPR002885|IPR011990	Pentatricopeptide repeat|Tetratricopeptide-like helical	GO:0005515	NULL	NULL
Dr15431	GO:0005739	NULL	pentatricopeptide repeat-containing protein	IPR002885|IPR011990	Pentatricopeptide repeat|Tetratricopeptide-like helical	GO:0005515	NULL	NULL
Dr15447	GO:0010268|GO:0005488|GO:0016131|GO:0004497	NULL	cytochrome p450	IPR001128|IPR002403|IPR017972	Cytochrome P450|Cytochrome P450, E-class, group IV|Cytochrome P450, conserved site	GO:0005506|GO:0016705|GO:0020037|GO:0055114|GO:0004497	NULL	Reactome: REACT_13433
Dr15456	GO:0009658|GO:0040007|GO:0009507|GO:0009416|GO:0009451	NULL	pentatricopeptide repeat-containing protein	IPR002885|IPR011990	Pentatricopeptide repeat|Tetratricopeptide-like helical	GO:0005515	NULL	NULL
Dr15482	NULL	NULL	NULL	IPR009057|IPR017877	Homeodomain-like|Myb-like domain	GO:0003677	NULL	NULL
Dr15484	GO:0043231|GO:0003676|GO:0008026|GO:0006139|GO:0000166	NULL	regulator of telomere elongation helicase 1	IPR010614|IPR006555|IPR027417|IPR014001|IPR006554|IPR014013	DEAD2|ATP-dependent helicase, C-terminal|P-loop containing nucleoside triphosphate hydrolase|Helicase, superfamily 1/2, ATP-binding domain|Helicase-like, DEXD box c2 type|Helicase, superfamily 1/2, ATP-binding domain, DinG/Rad3-type	GO:0003677|GO:0004003|GO:0005524|GO:0003676|GO:0006139|GO:0008026|GO:0016818|GO:0016817	NULL	NULL
Dr15492	GO:0003676|GO:0009536	NULL	pentatricopeptide repeat-containing protein	IPR002885|IPR011990	Pentatricopeptide repeat|Tetratricopeptide-like helical	GO:0005515	NULL	NULL
Dr15499	NULL	NULL	NULL	IPR005043|IPR001494|IPR013598|IPR013713|IPR016024|IPR011989	CAS/CSE, C-terminal|Importin-beta, N-terminal domain|Exportin-1/Importin-beta-like|Exportin/Importin, Cse1-like|Armadillo-type fold|Armadillo-like helical	GO:0005515|GO:0006886|GO:0008536|GO:0005488	NULL	NULL
Dr15543	GO:0003824	NULL	cytidine deaminase	IPR002125|IPR013171|IPR016193|IPR006263	CMP/dCMP deaminase, zinc-binding|Cytidine/deoxycytidylate deaminase, zinc-binding domain|Cytidine deaminase-like|Cytidine deaminase, homodimeric	GO:0008270|GO:0016787|GO:0004126|GO:0009972|GO:0003824	EC:3.5.4.5	KEGG: 00240+3.5.4.5|KEGG: 00983+3.5.4.5|MetaCyc: PWY-6556|MetaCyc: PWY-7181|MetaCyc: PWY-7193|MetaCyc: PWY-7199
Dr15570	GO:0005739|GO:0016363	NULL	protein	IPR007109|IPR004154	Brix domain|Anticodon-binding	NULL	NULL	NULL
Dr03806	GO:0016020	NULL	lmbr1 domain-containing protein 2 homolog a-like	IPR006876	LMBR1-like membrane protein	NULL	NULL	NULL
Dr03807	GO:0017111|GO:0006260|GO:0003677|GO:0005524|GO:0006974	EC:3.6.1.15	dna replication licensing factor mcm9-like	IPR001208|IPR012340|IPR027417|IPR003593	Mini-chromosome maintenance, DNA-dependent ATPase|Nucleic acid-binding, OB-fold|P-loop containing nucleoside triphosphate hydrolase|AAA+ ATPase domain	GO:0003677|GO:0005524|GO:0006260|GO:0000166|GO:0017111	NULL	NULL
Dr03805	GO:0005739	NULL	duf246 domain-containing protein at1g04910-like	IPR019378|IPR024709	GDP-fucose protein O-fucosyltransferase|O-fucosyltransferase, plant	NULL	EC:2.4.1.221	KEGG: 00514+2.4.1.221|UniPathway: UPA00378
Dr03876	NULL	NULL	NULL	IPR003323	Ovarian tumour, otubain	NULL	NULL	NULL
Dr03877	GO:0004672|GO:0006468|GO:0005524	NULL	protein kinase chloroplast	IPR000719|IPR011009|IPR013320|IPR017441	Protein kinase domain|Protein kinase-like domain|Concanavalin A-like lectin/glucanase, subgroup|Protein kinase, ATP binding site	GO:0004672|GO:0005524|GO:0006468|GO:0016772	NULL	NULL
Dr15606	GO:0019253|GO:0046872|GO:0042132|GO:0004331|GO:0009409|GO:0009773|GO:0010319|GO:0009570|GO:0032440|GO:0048046|GO:0006000|GO:0006013|GO:0006094|GO:0006096|GO:0006098|GO:0015976	EC:3.1.3.11|EC:3.1.3.46|EC:1.3.1.74	fructose- -bisphosphatase	IPR000146|IPR028343|IPR020548	Fructose-1,6-bisphosphatase class 1/Sedoheputulose-1,7-bisphosphatase|Fructose-1,6-bisphosphatase|Fructose-1,6-bisphosphatase, active site	GO:0005975|GO:0042132|GO:0042578	EC:3.1.3.11	KEGG: 00010+3.1.3.11|KEGG: 00030+3.1.3.11|KEGG: 00051+3.1.3.11|KEGG: 00680+3.1.3.11|KEGG: 00710+3.1.3.11|MetaCyc: PWY-5484|Reactome: REACT_474|UniPathway: UPA00138|KEGG: 00010+3.1.3.11|KEGG: 00030+3.1.3.11|KEGG: 00051+3.1.3.11|KEGG: 00680+3.1.3.11|KEGG: 00710+3.1.3.11|MetaCyc: PWY-5484|UniPathway: UPA00138|KEGG: 00010+3.1.3.11|KEGG: 00030+3.1.3.11|KEGG: 00051+3.1.3.11|KEGG: 00680+3.1.3.11|KEGG: 0…
Dr15627	GO:0009535|GO:0005506	NULL	protein	IPR024935|IPR004039|IPR024934|IPR018527	Rubredoxin domain|Rubredoxin-type fold|Rubredoxin-like domain|Rubredoxin, iron-binding site	GO:0005506|GO:0046872	NULL	NULL
Dr15652	GO:0005886|GO:0006468|GO:0005524|GO:0004674|GO:0005739|GO:0009069	EC:2.7.11.0	receptor-like serine threonine-protein kinase ale2-like	IPR000719|IPR011009|IPR013320|IPR017441|IPR008271	Protein kinase domain|Protein kinase-like domain|Concanavalin A-like lectin/glucanase, subgroup|Protein kinase, ATP binding site|Serine/threonine-protein kinase, active site	GO:0004672|GO:0005524|GO:0006468|GO:0016772|GO:0004674	NULL	NULL
Dr15695	GO:0044765|GO:0044763|GO:0016020	NULL	protein	IPR026957|IPR003864	Transmembrane protein 63|Domain of unknown function DUF221	GO:0016020	NULL	NULL
Dr15748	NULL	NULL	NULL	IPR002562|IPR002782|IPR012337	3'-5' exonuclease domain|Mut7-C RNAse domain|Ribonuclease H-like domain	GO:0003676|GO:0006139|GO:0008408	NULL	NULL
Dr15756	GO:0003677|GO:0003682|GO:0000785	NULL	40s ribosomal protein s10-like protein	IPR001005|IPR009057|IPR017930	SANT/Myb domain|Homeodomain-like|Myb domain	GO:0003682|GO:0003677	NULL	NULL
Dr15760	GO:0005739	NULL	upf0551 protein c8orf38 mitochondrial-like	IPR002060|IPR008949	Squalene/phytoene synthase|Terpenoid synthase	GO:0009058|GO:0016740	NULL	NULL
Dr15761	GO:0005739|GO:0009536	NULL	pentatricopeptide repeat-containing protein	IPR002885|IPR011990	Pentatricopeptide repeat|Tetratricopeptide-like helical	GO:0005515	NULL	NULL
Dr15832	GO:0005739	NULL	pentatricopeptide repeat-containing protein	IPR002885	Pentatricopeptide repeat	NULL	NULL	NULL
Dr15835	GO:0016023	NULL	f-box kelch-repeat protein skip30-like	IPR001810|IPR006652|IPR015916	F-box domain|Kelch repeat type 1|Galactose oxidase, beta-propeller	GO:0005515	NULL	NULL
Dr15881	GO:0044249|GO:1901137|GO:0044763|GO:0044710|GO:0005975|GO:0006807|GO:0008375	NULL	udp-n-acetylglucosamine--n-acetylmuramyl- pyrophosphoryl-undecaprenol n-acetylglucosamine transferase	IPR006009|IPR004276|IPR007235	N-acetylglucosaminyltransferase, MurG|Glycosyl transferase, family 28|Glycosyl transferase, family 28, C-terminal	GO:0019277|GO:0050511|GO:0005975|GO:0016758|GO:0030259|GO:0030246	EC:2.4.1.227	KEGG: 00550+2.4.1.227|MetaCyc: PWY-5265|MetaCyc: PWY-6385|MetaCyc: PWY-6470|MetaCyc: PWY-6471|UniPathway: UPA00219
Dr15883	NULL	NULL	NULL	IPR008545	WEB family	NULL	NULL	NULL
Dr15908	NULL	NULL	NULL	IPR002885|IPR011990	Pentatricopeptide repeat|Tetratricopeptide-like helical	GO:0005515	NULL	NULL
Dr15931	GO:0005524|GO:0017111|GO:0005739	EC:3.6.1.15	atp binding	IPR019591|IPR025669|IPR027417	ATPase-like, ParA/MinD|AAA domain|P-loop containing nucleoside triphosphate hydrolase	NULL	NULL	NULL
Dr15893	GO:0015706|GO:0016020|GO:0048316|GO:0005215	NULL	nitrate	IPR000109|IPR016196	Proton-dependent oligopeptide transporter family|Major facilitator superfamily domain, general substrate transporter	GO:0005215|GO:0006810|GO:0016020	NULL	Reactome: REACT_15518|Reactome: REACT_19419
Dr15899	NULL	NULL	NULL	IPR002885|IPR011990	Pentatricopeptide repeat|Tetratricopeptide-like helical	GO:0005515	NULL	NULL
Dr15962	GO:0016070|GO:0005739	NULL	trna pseudouridine synthase-like	IPR001406|IPR020097|IPR020103|IPR020094|IPR020095	Pseudouridine synthase I, TruA|Pseudouridine synthase I, TruA, alpha/beta domain|Pseudouridine synthase, catalytic domain|Pseudouridine synthase I, TruA, N-terminal|Pseudouridine synthase I, TruA, C-terminal	GO:0001522|GO:0003723|GO:0009451|GO:0009982	NULL	NULL
Dr15983	GO:0046872|GO:0004222|GO:0006508	EC:3.4.24.0	insulin-degrading enzyme-like	IPR011765|IPR007863|IPR011249|IPR011237|IPR001431	Peptidase M16, N-terminal|Peptidase M16, C-terminal domain|Metalloenzyme, LuxS/M16 peptidase-like|Peptidase M16 domain|Peptidase M16, zinc-binding site	GO:0003824|GO:0046872|GO:0004222|GO:0006508	NULL	NULL
Dr16064	GO:0031011	NULL	protein	IPR024867|IPR012942	Nuclear factor related to kappa-B-binding protein|Sensitivity To Red Light Reduced-like, SRR1	GO:0031011	NULL	NULL
Dr16012	NULL	NULL	NULL	IPR021102	Peptide-N4-(N-acetyl-beta-glucosaminyl)asparagine amidase A	NULL	NULL	NULL
Dr16023	GO:0016023|GO:0006468|GO:0005524|GO:0016020|GO:0004674|GO:0009069	EC:2.7.11.0	serine threonine-protein kinase-like protein ccr3-like	IPR000719|IPR009091|IPR011009|IPR013320|IPR002290|IPR017441|IPR008271	Protein kinase domain|Regulator of chromosome condensation 1/beta-lactamase-inhibitor protein II|Protein kinase-like domain|Concanavalin A-like lectin/glucanase, subgroup|Serine/threonine- / dual specificity protein kinase, catalytic domain|Protein kinase, ATP binding site|Serine/threonine-protein kinase, active site	GO:0004672|GO:0005524|GO:0006468|GO:0016772|GO:0004674	NULL	NULL
Dr16038	GO:0016021|GO:0009536|GO:0055085	NULL	mitochondrial substrate carrier family protein	IPR018108|IPR023395	Mitochondrial substrate/solute carrier|Mitochondrial carrier domain	NULL	NULL	NULL
Dr16175	NULL	NULL	NULL	IPR017986|IPR015943|IPR003888	WD40-repeat-containing domain|WD40/YVTN repeat-like-containing domain|FY-rich, N-terminal	GO:0005515|GO:0005634	NULL	NULL
Dr16182	GO:0003827|GO:0008455|GO:0005795|GO:0009312|GO:0016021|GO:0005739	EC:2.4.1.101|EC:2.4.1.143	beta- -n-acetylglucosaminyltransferase ii	IPR007754	N-acetylglucosaminyltransferase II	GO:0005795|GO:0008455|GO:0009312|GO:0016021	EC:2.4.1.143	KEGG: 00510+2.4.1.143|KEGG: 00513+2.4.1.143|UniPathway: UPA00378
Dr25028	GO:0006457|GO:0000413|GO:0003755	EC:5.2.1.8	peptidyl-prolyl cis-trans isomerase-like 3	IPR002130|IPR020892	Cyclophilin-like peptidyl-prolyl cis-trans isomerase domain|Cyclophilin-type peptidyl-prolyl cis-trans isomerase, conserved site	GO:0003755|GO:0006457	NULL	NULL
Dr16228	GO:0009536	NULL	pentatricopeptide repeat-containing protein	IPR002885|IPR011990	Pentatricopeptide repeat|Tetratricopeptide-like helical	GO:0005515	NULL	NULL
Dr16240	GO:0007275	NULL	f-box protein ore9	IPR001810|IPR006553	F-box domain|Leucine-rich repeat, cysteine-containing subtype	GO:0005515	NULL	NULL
Dr16312	NULL	NULL	NULL	IPR019734|IPR011990|IPR013026	Tetratricopeptide repeat|Tetratricopeptide-like helical|Tetratricopeptide repeat-containing domain	GO:0005515	NULL	NULL
Dr16324	GO:0004746|GO:0009231|GO:0016491|GO:0009507|GO:0055114|GO:0009349	EC:2.5.1.9	riboflavin synthase alpha chain	IPR001783|IPR026017|IPR017938|IPR023366	Lumazine-binding protein|Lumazine-binding domain|Riboflavin synthase-like beta-barrel|ATP synthase subunit alpha-like domain	GO:0004746|GO:0009231|GO:0016491|GO:0055114	EC:2.5.1.9|EC:3.6.3.14	KEGG: 00740+2.5.1.9|MetaCyc: PWY-6167|MetaCyc: PWY-6168|UniPathway: UPA00275|KEGG: 00190+3.6.3.14|KEGG: 00195+3.6.3.14|MetaCyc: PWY-7219
Dr16211	NULL	NULL	NULL	IPR002885|IPR011990	Pentatricopeptide repeat|Tetratricopeptide-like helical	GO:0005515	NULL	NULL
Dr16225	NULL	NULL	NULL	IPR005333|IPR017887	Transcription factor, TCP|Transcription factor TCP subgroup	NULL	NULL	NULL
Dr16262	GO:0009987|GO:0046872|GO:0044699|GO:0044444	NULL	peroxisome assembly protein	IPR006845|IPR013083|IPR001841|IPR017907	Pex, N-terminal|Zinc finger, RING/FYVE/PHD-type|Zinc finger, RING-type|Zinc finger, RING-type, conserved site	GO:0005515|GO:0008270	NULL	NULL
Dr03903	GO:0005840|GO:0003735|GO:0006412|GO:0005739|GO:0042254	NULL	50s ribosomal protein l18	IPR005484	Ribosomal protein L18/L5	GO:0003735|GO:0005622|GO:0005840|GO:0006412	NULL	NULL
Dr03921	GO:0050616|GO:0016023|GO:0009055|GO:0004497|GO:0005506|GO:0020037|GO:0016705|GO:0055114|GO:0042432|GO:0006118	EC:1.3.3.9	cytokinin hydroxylase-like	IPR001128|IPR002401	Cytochrome P450|Cytochrome P450, E-class, group I	GO:0005506|GO:0016705|GO:0020037|GO:0055114	NULL	Reactome: REACT_13433
Dr16355	NULL	NULL	NULL	NULL	NULL	NULL	NULL	NULL
Dr16412	GO:0005739	NULL	pentatricopeptide repeat-containing protein	IPR002885|IPR011990	Pentatricopeptide repeat|Tetratricopeptide-like helical	GO:0005515	NULL	NULL
Dr16399	GO:0050896|GO:0009987	NULL	phytochelatin synthase	IPR007264|IPR007719|IPR015407	H/ACA ribonucleoprotein complex, subunit Nop10|Phytochelatin synthase|Phytochelatin synthase, C-terminal	GO:0001522|GO:0030515|GO:0042254|GO:0072588|GO:0010038|GO:0016756|GO:0046872|GO:0046938	NULL	MetaCyc: PWY-6745
Dr16339	GO:0003700|GO:0003677|GO:0006355|GO:0005667|GO:0045449	NULL	dreb-like protein 1	IPR001471|IPR016177	AP2/ERF domain|DNA-binding domain	GO:0003700|GO:0006355|GO:0003677	NULL	NULL
Dr16348	GO:0005739|GO:0070681|GO:0032543|GO:0050567|GO:0005524|GO:0016740|GO:0009570|GO:0030956|GO:0006536	EC:6.3.5.7	aspartyl-trna glutamyl-trna amidotransferase subunit b	IPR017959|IPR018027|IPR006075|IPR003789|IPR004413|IPR017958	Aspartyl/glutamyl-tRNA(Asn/Gln) amidotransferase, subunit B /E|Asn/Gln amidotransferase|Aspartyl/Glutamyl-tRNA(Gln) amidotransferase, subunit B/E, catalytic|Aspartyl/glutamyl-tRNA amidotransferase subunit B-related|Aspartyl/glutamyl-tRNA(Asn/Gln) amidotransferase, B subunit|Glutamyl-tRNA(Gln) amidotransferase, subunit B, conserved site	GO:0016884|GO:0016874	EC:6.3.5.-	KEGG: 00253+6.3.5.-
Dr16430	NULL	NULL	NULL	IPR002885|IPR011990	Pentatricopeptide repeat|Tetratricopeptide-like helical	GO:0005515	NULL	NULL
Dr16441	GO:0016023|GO:0005524	NULL	disease resistance protein rga3-like	NULL	NULL	NULL	NULL	NULL
Dr16452	GO:0090305|GO:0004518|GO:0009507|GO:0006281	NULL	dna-(apurinic or apyrimidinic site) lyase	IPR004808|IPR005135	AP endonuclease 1|Endonuclease/exonuclease/phosphatase	GO:0004518|GO:0006281	NULL	NULL
Dr16456	GO:0006457|GO:0005528|GO:0031977|GO:0009507|GO:0000413|GO:0016020|GO:0003755	EC:5.2.1.8	protein	IPR023566|IPR001179	Peptidyl-prolyl cis-trans isomerase, FKBP-type|Peptidyl-prolyl cis-trans isomerase, FKBP-type, domain	GO:0006457	NULL	NULL
Dr16470	GO:0005737|GO:0046872|GO:0019509|GO:0010309|GO:0005634|GO:0055114	EC:1.13.11.54	-dihydroxy-3-keto-5-methylthiopentene dioxygenase 4	IPR004313|IPR011051|IPR014710|IPR027496	Acireductone dioxygenase ARD family|RmlC-like cupin domain|RmlC-like jelly roll fold|1,2-dihydroxy-3-keto-5-methylthiopentene dioxygenase, eukaryotes	GO:0010309|GO:0055114|GO:0016491|GO:0019509	EC:1.13.11.54	KEGG: 00270+1.13.11.54|MetaCyc: PWY-6755|MetaCyc: PWY-7270|UniPathway: UPA00904
Dr16511	GO:0016020|GO:0005739|GO:0006810	NULL	mitochondrial substrate carrier family protein e	IPR018108|IPR023395	Mitochondrial substrate/solute carrier|Mitochondrial carrier domain	NULL	NULL	NULL
Dr16501	GO:0009941|GO:0090143|GO:0010020|GO:0042651	NULL	yggt family protein	IPR003425	Uncharacterised protein family Ycf19	GO:0016020	NULL	NULL
Dr16507	GO:0005622	NULL	50s ribosomal protein l7	IPR015608|IPR013823|IPR008932|IPR014719|IPR000206	Putative ribosomal protein L7/L12, plants|Ribosomal protein L7/L12, C-terminal|Ribosomal protein L7/L12, oligomerisation|Ribosomal protein L7/L12, C-terminal/adaptor protein ClpS-like|Ribosomal protein L7/L12	GO:0003735|GO:0005622|GO:0005840|GO:0006412	NULL	NULL
Dr16534	GO:0005840|GO:0003735|GO:0006412|GO:0005739|GO:0042254	NULL	ribosomal protein l7 l12 domain-containing protein	IPR015608|IPR013823|IPR014719	Putative ribosomal protein L7/L12, plants|Ribosomal protein L7/L12, C-terminal|Ribosomal protein L7/L12, C-terminal/adaptor protein ClpS-like	GO:0003735|GO:0005622|GO:0005840|GO:0006412	NULL	NULL
Dr16601	GO:0005779|GO:0016559	NULL	protein	IPR008733	Peroxisomal biogenesis factor 11	GO:0005779|GO:0016559	NULL	NULL
Dr16572	NULL	NULL	NULL	IPR006943	Domain of unknown function DUF641, plant	NULL	NULL	NULL
Dr16638	GO:0009536	NULL	fat-free-like protein	NULL	NULL	NULL	NULL	NULL
Dr16660	GO:0005737|GO:0042787|GO:0004842|GO:0005634	EC:6.3.2.19	e3 ubiquitin-protein ligase upl6	IPR000569|IPR000048	HECT|IQ motif, EF-hand binding site	GO:0004842|GO:0005515	EC:6.3.2.-	KEGG: 00300+6.3.2.-|KEGG: 00380+6.3.2.-|UniPathway: UPA00143
Dr16675	NULL	NULL	NULL	NULL	NULL	NULL	NULL	NULL
Dr16690	GO:0005739	NULL	uncharacterized protein	NULL	NULL	NULL	NULL	NULL
Dr16698	GO:0008026|GO:0003723|GO:0005524|GO:0009570|GO:0016020|GO:0005634|GO:0008270	NULL	dead-box atp-dependent rna helicase 3	IPR001878|IPR011545|IPR001650|IPR012562|IPR027417|IPR014001|IPR014014	Zinc finger, CCHC-type|DNA/RNA helicase, DEAD/DEAH box type, N-terminal|Helicase, C-terminal|GUCT|P-loop containing nucleoside triphosphate hydrolase|Helicase, superfamily 1/2, ATP-binding domain|RNA helicase, DEAD-box type, Q motif	GO:0003676|GO:0008270|GO:0005524|GO:0008026|GO:0004386|GO:0003723|GO:0005634	NULL	NULL
Dr16681	GO:0045439|GO:0030170|GO:0042318	EC:5.1.1.17	protein	IPR000192|IPR015424|IPR015421	Aminotransferase, class V/Cysteine desulfurase|Pyridoxal phosphate-dependent transferase|Pyridoxal phosphate-dependent transferase, major region, subdomain 1	GO:0008152|GO:0003824|GO:0030170	NULL	NULL
Dr16729	NULL	NULL	NULL	NULL	NULL	NULL	NULL	NULL
Dr16773	NULL	NULL	NULL	IPR007174	Las1-like	NULL	NULL	NULL
Dr03972	NULL	NULL	NULL	IPR008480	Protein of unknown function DUF761, plant	NULL	NULL	NULL
Dr04009	GO:0006200|GO:0005524|GO:0016887|GO:0016020	EC:3.6.1.3	abc transporter g family member 23	IPR003439|IPR013525|IPR027417|IPR003593|IPR017871	ABC transporter-like|ABC-2 type transporter|P-loop containing nucleoside triphosphate hydrolase|AAA+ ATPase domain|ABC transporter, conserved site	GO:0005524|GO:0016887|GO:0016020|GO:0000166|GO:0017111	NULL	NULL
Dr16806	GO:0003824	NULL	protein	IPR011257	DNA glycosylase	GO:0003824|GO:0006281	NULL	Reactome: REACT_216
Dr25179	GO:0005778|GO:0016021|GO:0007031	NULL	peroxisomal membrane protein 11a	IPR008733	Peroxisomal biogenesis factor 11	GO:0005779|GO:0016559	NULL	NULL
Dr16888	GO:0005886|GO:0008295|GO:0004766|GO:0032259|GO:0030750|GO:0006525|GO:0006560|GO:0019482|GO:0009821	EC:2.5.1.16|EC:2.1.1.53	spermidine synthase	IPR001045	Spermidine/spermine synthases family	GO:0003824	EC:2.5.1.16	KEGG: 00270+2.5.1.16|KEGG: 00330+2.5.1.16|KEGG: 00410+2.5.1.16|KEGG: 00480+2.5.1.16|UniPathway: UPA00248
Dr16913	GO:0005739	NULL	pentatricopeptide repeat-containing protein	IPR002885|IPR011990	Pentatricopeptide repeat|Tetratricopeptide-like helical	GO:0005515	NULL	NULL
Dr16944	NULL	NULL	NULL	NULL	NULL	NULL	NULL	NULL
Dr16958	GO:0004334|GO:0006570|GO:0042207	EC:3.7.1.2	fumarylacetoacetase	IPR005959|IPR002529|IPR015377|IPR011234|IPR011990|IPR019734	Fumarylacetoacetase|Fumarylacetoacetase, C-terminal|Fumarylacetoacetase, N-terminal|Fumarylacetoacetase, C-terminal-related|Tetratricopeptide-like helical|Tetratricopeptide repeat	GO:0004334|GO:0009072|GO:0003824|GO:0008152|GO:0005515	EC:3.7.1.2	KEGG: 00350+3.7.1.2|KEGG: 00643+3.7.1.2|UniPathway: UPA00139
Dr16963	NULL	NULL	NULL	IPR001680|IPR017986|IPR015943	WD40 repeat|WD40-repeat-containing domain|WD40/YVTN repeat-like-containing domain	GO:0005515	NULL	NULL
Dr16969	GO:0005886	NULL	fasciclin-like arabinogalactan protein 7	IPR000782	FAS1 domain	NULL	NULL	NULL
Dr16976	GO:0046872|GO:0020037|GO:0010311|GO:0005829	NULL	reduced lateral root formation protein	IPR001199|IPR018506	Cytochrome b5-like heme/steroid binding domain|Cytochrome b5, heme-binding site	GO:0020037	NULL	NULL
Dr16986	GO:0005783|GO:0005618|GO:0016757	NULL	anthranilate phosphoribosyltransferase-like protein	IPR000008|IPR013583	C2 domain|Phosphoribosyltransferase C-terminal	GO:0005515	NULL	NULL
Dr16904	GO:0016020	NULL	membrane protein	IPR018710	Protein of unknown function DUF2232, membrane	NULL	NULL	NULL
Dr16916	NULL	NULL	NULL	IPR002885|IPR011990	Pentatricopeptide repeat|Tetratricopeptide-like helical	GO:0005515	NULL	NULL
Dr16918	GO:0016874|GO:0009536	NULL	f-box kelch-repeat protein	IPR001810|IPR015916	F-box domain|Galactose oxidase, beta-propeller	GO:0005515	NULL	NULL
Dr16937	GO:0016772|GO:0009507	NULL	protein kinase domain-containing protein	IPR004147|IPR011009	UbiB domain|Protein kinase-like domain	GO:0016772	NULL	NULL
Dr16853	GO:0009536	NULL	octicosapeptide phox bem1p domain-containing protein	IPR000270|IPR011990	Phox/Bem1p|Tetratricopeptide-like helical	GO:0005515	NULL	NULL
Dr16981	NULL	NULL	NULL	IPR000467|IPR000061	G-patch domain|SWAP/Surp	GO:0003676|GO:0003723|GO:0006396	NULL	NULL
Dr16989	NULL	NULL	NULL	IPR008480	Protein of unknown function DUF761, plant	NULL	NULL	NULL
Dr17051	GO:0016021|GO:0016853|GO:0004579|GO:0008250|GO:0018279	EC:2.4.1.119	dolichyl-diphosphooligosaccharide-protein glycosyltransferase subunit	IPR007676	Ribophorin I	GO:0004579|GO:0005783|GO:0006486|GO:0016021	EC:2.4.99.18	KEGG: 00510+2.4.99.18|KEGG: 00513+2.4.99.18|UniPathway: UPA00378
Dr17052	NULL	NULL	NULL	IPR004326	Mlo-related protein	GO:0006952|GO:0016021	NULL	NULL
Dr17037	NULL	NULL	NULL	NULL	NULL	NULL	NULL	NULL
Dr17044	NULL	NULL	NULL	NULL	NULL	NULL	NULL	NULL
Dr17009	GO:0051536	NULL	glutaredoxin s17	IPR004480|IPR002109|IPR012336	Monothiol glutaredoxin-related|Glutaredoxin|Thioredoxin-like fold	GO:0009055|GO:0015035|GO:0045454	NULL	NULL
Dr17012	GO:0016020	NULL	mlo-like protein 14	IPR004326	Mlo-related protein	GO:0006952|GO:0016021	NULL	NULL
Dr17105	GO:0046872|GO:0016874	NULL	e3 ubiquitin-protein ligase xbat33-like	IPR020683|IPR013083|IPR001841|IPR002110|IPR017907	Ankyrin repeat-containing domain|Zinc finger, RING/FYVE/PHD-type|Zinc finger, RING-type|Ankyrin repeat|Zinc finger, RING-type, conserved site	GO:0005515|GO:0008270	NULL	NULL
Dr17113	GO:0031167|GO:0009409|GO:0097159|GO:0009536|GO:0000179|GO:1901363	NULL	dimethyladenosine transferase	IPR001737|IPR023165|IPR020598	Ribosomal RNA adenine methylase transferase|rRNA adenine dimethylase-like|Ribosomal RNA adenine methylase transferase, N-terminal	GO:0000154|GO:0000179|GO:0008649	NULL	NULL
Dr17129	NULL	NULL	NULL	NULL	NULL	NULL	NULL	NULL
Dr17190	NULL	NULL	NULL	NULL	NULL	NULL	NULL	NULL
Dr17170	GO:0016491|GO:0005739|GO:0005509	NULL	probable calcium-binding protein cml15-like	IPR011992|IPR002048|IPR018247	EF-hand domain pair|EF-hand domain|EF-Hand 1, calcium-binding site	GO:0005509	NULL	NULL
Dr17198	GO:0016023|GO:0003824	NULL	protein too many mouths-like	IPR001611|IPR003591	Leucine-rich repeat|Leucine-rich repeat, typical subtype	GO:0005515	NULL	NULL
Dr17199	GO:0006629|GO:0005488|GO:0016705	NULL	fatty acid	IPR001199|IPR005804|IPR012171	Cytochrome b5-like heme/steroid binding domain|Fatty acid desaturase, type 1|Fatty acid/sphingolipid desaturase	GO:0020037|GO:0006629|GO:0005506|GO:0006633|GO:0016717|GO:0055114	NULL	NULL
Dr17219	NULL	NULL	NULL	IPR021629	Mediator complex, subunit Med23	NULL	NULL	NULL
Dr17226	NULL	NULL	NULL	IPR021148|IPR006514	Putative polysaccharide biosynthesis protein|Xylan biosynthesis protein IRX15/IRX15L	NULL	NULL	NULL
Dr17233	NULL	NULL	NULL	NULL	NULL	NULL	NULL	NULL
Dr17276	GO:0008270	NULL	swim zinc finger-like protein	IPR007527	Zinc finger, SWIM-type	GO:0008270	NULL	NULL
Dr17300	NULL	NULL	NULL	IPR002885|IPR011990	Pentatricopeptide repeat|Tetratricopeptide-like helical	GO:0005515	NULL	NULL
Dr17321	NULL	NULL	NULL	IPR001810|IPR015916|IPR006652	F-box domain|Galactose oxidase, beta-propeller|Kelch repeat type 1	GO:0005515	NULL	NULL
Dr17338	GO:0009941|GO:0016491|GO:0009570|GO:0048046	NULL	protein	NULL	NULL	NULL	NULL	NULL
Dr17262	GO:0005488|GO:0050896|GO:0009987	NULL	auxin-induced protein 6b	IPR003676	Auxin-induced protein, ARG7	NULL	NULL	NULL
Dr17293	GO:0003964|GO:0006278|GO:0003723	EC:2.7.7.49	protein trichome birefringence-like 5	IPR026057	PC-Esterase	NULL	NULL	NULL
Dr17304	GO:0016021|GO:0010176|GO:0010189|GO:0009266|GO:0009915|GO:0046408|GO:0006636|GO:0009535|GO:0031347	EC:2.5.1.62	homogentisate phytyltransferase vte2-1	IPR000537	UbiA prenyltransferase family	GO:0004659|GO:0016021	EC:2.5.1.-	KEGG: 00130+2.5.1.-|KEGG: 00270+2.5.1.-|KEGG: 00361+2.5.1.-|KEGG: 00380+2.5.1.-|KEGG: 00860+2.5.1.-|KEGG: 00920+2.5.1.-
Dr17305	NULL	NULL	NULL	IPR002885|IPR011990	Pentatricopeptide repeat|Tetratricopeptide-like helical	GO:0005515	NULL	NULL
Dr17367	GO:0022891|GO:0016491|GO:0055085|GO:0016021|GO:0071702	NULL	probable inositol transporter 2-like	IPR005828|IPR016196|IPR003663|IPR020846|IPR005829	General substrate transporter|Sugar/inositol transporter|Major facilitator superfamily domain, general substrate transporter|Major facilitator superfamily domain|Sugar transporter, conserved site	GO:0016021|GO:0022857|GO:0055085|GO:0016020|GO:0022891|GO:0005215|GO:0006810	NULL	Reactome: REACT_15518
Dr04061	NULL	NULL	NULL	IPR001440|IPR001214|IPR011990|IPR019734|IPR013026	Tetratricopeptide TPR1|SET domain|Tetratricopeptide-like helical|Tetratricopeptide repeat|Tetratricopeptide repeat-containing domain	GO:0005515	NULL	NULL
Dr04034	GO:0044765|GO:0016482|GO:0043231|GO:0044444	NULL	f-box kelch-repeat protein skip11-like	IPR006652|IPR015916	Kelch repeat type 1|Galactose oxidase, beta-propeller	GO:0005515	NULL	NULL
Dr04053	NULL	NULL	NULL	IPR002885|IPR011990	Pentatricopeptide repeat|Tetratricopeptide-like helical	GO:0005515	NULL	NULL
Dr04082	GO:0050789|GO:0004674|GO:0016023|GO:0000166|GO:0016310|GO:0009069	EC:2.7.11.0	leucine-rich repeat receptor-like serine threonine tyrosine-protein kinase sobir1-like	IPR000719|IPR025875|IPR011009|IPR002290|IPR008271	Protein kinase domain|Leucine rich repeat 4|Protein kinase-like domain|Serine/threonine- / dual specificity protein kinase, catalytic domain|Serine/threonine-protein kinase, active site	GO:0004672|GO:0005524|GO:0006468|GO:0016772|GO:0004674	NULL	NULL
Dr04084	GO:0020037|GO:0016705|GO:0004497|GO:0005506|GO:0009055|GO:0055114|GO:0009536|GO:0006118	NULL	cytochrome p450	IPR001128|IPR002401|IPR017972	Cytochrome P450|Cytochrome P450, E-class, group I|Cytochrome P450, conserved site	GO:0005506|GO:0016705|GO:0020037|GO:0055114	NULL	Reactome: REACT_13433
Dr04113	GO:0009536	NULL	pentatricopeptide repeat-containing protein	IPR002885|IPR011990	Pentatricopeptide repeat|Tetratricopeptide-like helical	GO:0005515	NULL	NULL
Dr04136	GO:0051536|GO:0009294|GO:0046872|GO:0006355|GO:0035265|GO:0016573|GO:0004402|GO:0008283|GO:0000123|GO:0042967	EC:2.3.1.48	histone acetyltransferase	IPR007197|IPR023404|IPR006638|IPR005910	Radical SAM|Radical SAM, alpha/beta horseshoe|Elongator protein 3/MiaB/NifB|Histone acetyltransferase ELP3	GO:0003824|GO:0051536	EC:2.-.-.-	KEGG: 00231+2.-.-.-
Dr04106	GO:0044424	NULL	at1g67740 f12a21_13	IPR009388	Photosystem II PsbY	GO:0009523|GO:0015979|GO:0016021|GO:0030145	NULL	NULL
Dr04165	GO:0006468|GO:0004712|GO:0005524|GO:0004674|GO:0009536|GO:0009069	EC:2.7.112.1|EC:2.7.11.0	serine threonine-protein kinase afc3	IPR000719|IPR011009|IPR002290|IPR008271	Protein kinase domain|Protein kinase-like domain|Serine/threonine- / dual specificity protein kinase, catalytic domain|Serine/threonine-protein kinase, active site	GO:0004672|GO:0005524|GO:0006468|GO:0016772|GO:0004674	NULL	NULL
Dr04199	GO:0016671|GO:0009055|GO:0045454|GO:0006662|GO:0031969|GO:0009570|GO:0015035|GO:0022900|GO:0006118	EC:1.8.4.0	thioredoxin-like chloroplastic-like	IPR005746|IPR013766|IPR012336|IPR017937	Thioredoxin|Thioredoxin domain|Thioredoxin-like fold|Thioredoxin, conserved site	GO:0006662|GO:0015035|GO:0045454	NULL	NULL
Dr04190	GO:0005730|GO:0003723|GO:0006364|GO:0030529	NULL	ribosomal rna assembly protein mis3-like	IPR024166	Ribosomal RNA assembly KRR1	NULL	NULL	NULL
Dr04236	GO:0006412|GO:0005618|GO:0005730|GO:0003735|GO:0022627|GO:0000166|GO:0009507|GO:0005886|GO:0042254	NULL	mms19 nucleotide excision repair protein	IPR001976|IPR024687|IPR016024|IPR012678|IPR011989|IPR012677	Ribosomal protein S24e|RNAPII transcription regulator C-terminal|Armadillo-type fold|Ribosomal protein L23/L15e core domain|Armadillo-like helical|Nucleotide-binding, alpha-beta plait	GO:0003735|GO:0005622|GO:0005840|GO:0006412|GO:0005488|GO:0000166	NULL	NULL
Dr04207	GO:0010053|GO:0016021|GO:0009932|GO:0016817|GO:0030036|GO:0006888|GO:0009832|GO:0005789|GO:0005525|GO:0005886	NULL	protein root hair defective 3 homolog 1-like	IPR008803|IPR027417	RHD3/Sey1|P-loop containing nucleoside triphosphate hydrolase	NULL	NULL	NULL
Dr04226	GO:0006520|GO:0000166|GO:0055114|GO:0004354|GO:0006118	EC:1.4.1.4	nadp-specific glutamate dehydrogenase-like	IPR006096|IPR006097|IPR016040|IPR006095	Glutamate/phenylalanine/leucine/valine dehydrogenase, C-terminal|Glutamate/phenylalanine/leucine/valine dehydrogenase, dimerisation domain|Glutamate/phenylalanine/leucine/valine dehydrogenase|NAD(P)-binding domain	GO:0006520|GO:0016491|GO:0055114	NULL	NULL
Dr04253	NULL	NULL	NULL	NULL	NULL	NULL	NULL	NULL
Dr04249	NULL	NULL	NULL	NULL	NULL	NULL	NULL	NULL
Dr04296	NULL	NULL	NULL	IPR011598	Myc-type, basic helix-loop-helix (bHLH) domain	GO:0046983	NULL	NULL
Dr04310	GO:0006351	NULL	scarecrow-like protein 4-like	IPR005202	Transcription factor GRAS	NULL	NULL	NULL
Dr04325	GO:0009735|GO:0008152|GO:0016597	NULL	act domain-containing protein	IPR002912	ACT domain	GO:0008152|GO:0016597	NULL	NULL
Dr25244	GO:0044763|GO:0005739|GO:0009856|GO:0071944|GO:0016020|GO:0044707	NULL	protein	IPR007225	Exocyst complex subunit Sec15-like	GO:0000145|GO:0006904	NULL	NULL
Dr17393	GO:0051501|GO:0004311|GO:0009536|GO:0006694|GO:0016114	EC:2.5.1.29	geranylgeranyl pyrophosphate synthase 4	IPR017446|IPR000092|IPR008949	Polyprenyl synthetase-related|Polyprenyl synthetase|Terpenoid synthase	GO:0008299	NULL	NULL
Dr17481	GO:0009536	NULL	uncharacterized protein	IPR025638	Protein of unknown function DUF4336	NULL	NULL	NULL
Dr17448	NULL	NULL	NULL	NULL	NULL	NULL	NULL	NULL
Dr17579	GO:0006355|GO:0044699	NULL	gras family transcription factor	IPR005202	Transcription factor GRAS	NULL	NULL	NULL
Dr17584	NULL	NULL	NULL	NULL	NULL	NULL	NULL	NULL
Dr17544	GO:0003861|GO:0051539|GO:0009570|GO:0046686|GO:0019761|GO:0050486|GO:0009097|GO:0009098|GO:0009099|GO:0009316	EC:4.2.1.33|EC:5.4.4.0	3-isopropylmalate dehydratase	IPR015937|IPR015930|IPR001030|IPR015931|IPR015932|IPR006251	Aconitase/isopropylmalate dehydratase|Aconitase B, iron-sulphur-binding, bacterial|Aconitase/3-isopropylmalate dehydratase large subunit, alpha/beta/alpha|Aconitase/3-isopropylmalate dehydratase large subunit, alpha/beta/alpha, subdomain 1/3|Aconitase/3-isopropylmalate dehydratase large subunit, alpha/beta/alpha, subdomain 2|Homoaconitase/3-isopropylmalate dehydratase, large subunit	GO:0008152|GO:0003994|GO:0006099|GO:0051539|GO:0008652|GO:0016836	EC:4.2.1.33	KEGG: 00290+4.2.1.33|UniPathway: UPA00048
Dr17586	GO:0009536	NULL	far-red impaired response protein	IPR004330|IPR007527|IPR006564	FAR1 DNA binding domain|Zinc finger, SWIM-type|Zinc finger, PMZ-type	GO:0008270	NULL	NULL
Dr17666	GO:0071446|GO:0004004|GO:0003676|GO:0071369|GO:0006968|GO:0071395|GO:0005524|GO:0009817|GO:0009507	NULL	dead-box atp-dependent rna helicase 50-like	IPR001041|IPR011545|IPR001650|IPR027417|IPR012675|IPR014001|IPR014014	2Fe-2S ferredoxin-type domain|DNA/RNA helicase, DEAD/DEAH box type, N-terminal|Helicase, C-terminal|P-loop containing nucleoside triphosphate hydrolase|Beta-grasp domain|Helicase, superfamily 1/2, ATP-binding domain|RNA helicase, DEAD-box type, Q motif	GO:0009055|GO:0051536|GO:0003676|GO:0005524|GO:0008026|GO:0004386	NULL	NULL
Dr17673	GO:0009536	NULL	50s ribosomal protein l3	IPR019927|IPR000597|IPR009000	Ribosomal protein L3, bacterial/organelle-type|Ribosomal protein L3|Translation protein, beta-barrel domain	GO:0003735|GO:0005622|GO:0005840|GO:0006412	NULL	NULL
Dr17626	GO:0046872|GO:0016023|GO:0008237	NULL	metalloendoproteinase 1	IPR001818|IPR002477|IPR024079|IPR021190|IPR006026	Peptidase M10, metallopeptidase|Peptidoglycan binding-like|Peptidase M10A|Metallopeptidase, catalytic domain|Peptidase, metallopeptidase	GO:0004222|GO:0006508|GO:0008270|GO:0031012|GO:0008237	NULL	NULL
Dr17692	GO:0016023|GO:0016614|GO:0005576|GO:0022900|GO:0019139	EC:1.5.99.12	cytokinin oxidase	IPR006094|IPR015345|IPR016164|IPR016166|IPR016167|IPR016169|IPR016170|IPR006093	FAD linked oxidase, N-terminal|Cytokinin dehydrogenase 1, FAD/cytokinin binding domain|FAD-linked oxidase-like, C-terminal|FAD-binding, type 2|FAD-binding, type 2, subdomain 1|CO dehydrogenase flavoprotein-like, FAD-binding, subdomain 2|Vanillyl-alcohol oxidase/Cytokinin dehydrogenase C-terminal domain|Oxygen oxidoreductase covalent FAD-binding site	GO:0008762|GO:0016491|GO:0050660|GO:0055114|GO:0009690|GO:0019139|GO:0003824|GO:0016614	EC:1.3.1.98|EC:1.5.99.12	KEGG: 00520+1.3.1.98|KEGG: 00550+1.3.1.98|MetaCyc: PWY-6386|MetaCyc: PWY-6387|UniPathway: UPA00219|KEGG: 00908+1.5.99.12
Dr17693	NULL	NULL	NULL	IPR024964|IPR006595|IPR013144|IPR006594	CTLH/CRA C-terminal to LisH motif domain|CTLH, C-terminal LisH motif|CRA domain|LisH dimerisation motif	GO:0005515	NULL	NULL
Dr04351	GO:0017004|GO:0030288|GO:0015439|GO:0006200|GO:0005524|GO:0015886	EC:3.6.3.41	abc transporter family protein	IPR003439|IPR027417|IPR003593|IPR005895	ABC transporter-like|P-loop containing nucleoside triphosphate hydrolase|AAA+ ATPase domain|ABC transporter, haem export, CcmA	GO:0005524|GO:0016887|GO:0000166|GO:0017111|GO:0005215|GO:0017004|GO:0030288	NULL	NULL
Dr04360	GO:0003700|GO:0005739|GO:0006355|GO:0005667|GO:0045449	NULL	membrane-associated salt-inducible protein	IPR002885|IPR011990	Pentatricopeptide repeat|Tetratricopeptide-like helical	GO:0005515	NULL	NULL
Dr04375	GO:0042545|GO:0004091|GO:0016023|GO:0005618|GO:0030599|GO:0045330|GO:0004857|GO:0043086|GO:0045490|GO:0005982|GO:0005985	EC:3.1.1.1|EC:3.1.1.11	pectinesterase family protein	IPR000070|IPR006501|IPR011050|IPR012334|IPR018040	Pectinesterase, catalytic|Pectinesterase inhibitor domain|Pectin lyase fold/virulence factor|Pectin lyase fold|Pectinesterase, active site	GO:0005618|GO:0030599|GO:0042545|GO:0004857	EC:3.1.1.11	KEGG: 00040+3.1.1.11|KEGG: 00500+3.1.1.11|MetaCyc: PWY-1081|MetaCyc: PWY-7243|MetaCyc: PWY-7246|MetaCyc: PWY-7248|UniPathway: UPA00545
Dr04379	GO:0004386|GO:0000166	NULL	pre-mrna-splicing factor atp-dependent rna helicase prp16	IPR001650|IPR007502|IPR011709|IPR027417|IPR014001|IPR002464	Helicase, C-terminal|Helicase-associated domain|Domain of unknown function DUF1605|P-loop containing nucleoside triphosphate hydrolase|Helicase, superfamily 1/2, ATP-binding domain|DNA/RNA helicase, ATP-dependent, DEAH-box type, conserved site	GO:0003676|GO:0004386|GO:0005524|GO:0008026	NULL	NULL
Dr04385	GO:0006810|GO:0044763|GO:0048856|GO:0005509|GO:0006457|GO:0009856|GO:0048610|GO:0071944|GO:0005788|GO:0051082|GO:0007275|GO:0003006	NULL	probable exocyst complex component 4-like	IPR001580|IPR007191|IPR008985|IPR009033|IPR013320|IPR018124	Calreticulin/calnexin|Sec8 exocyst complex component specific domain|Concanavalin A-like lectin/glucanases superfamily|Calreticulin/calnexin, P domain|Concanavalin A-like lectin/glucanase, subgroup|Calreticulin/calnexin, conserved site	GO:0005509|GO:0005783|GO:0006457|GO:0051082|GO:0000145|GO:0006904|GO:0015031|GO:0005515	NULL	NULL
Dr04388	NULL	NULL	NULL	IPR025322	Protein of unknown function DUF4228, plant	NULL	NULL	NULL
Dr04423	GO:0008026|GO:0003676|GO:0005524|GO:0005739	NULL	dead-box atp-dependent rna helicase 24	IPR011545|IPR001650|IPR027417|IPR014001|IPR014014|IPR000629	DNA/RNA helicase, DEAD/DEAH box type, N-terminal|Helicase, C-terminal|P-loop containing nucleoside triphosphate hydrolase|Helicase, superfamily 1/2, ATP-binding domain|RNA helicase, DEAD-box type, Q motif|RNA helicase, ATP-dependent, DEAD-box, conserved site	GO:0003676|GO:0005524|GO:0008026|GO:0004386	NULL	NULL
Dr04428	GO:0016023|GO:0071944	NULL	nodal modulator 1-like	IPR013784|IPR008969|IPR008970|IPR013783|IPR014766	Carbohydrate-binding-like fold|Carboxypeptidase-like, regulatory domain|Collagen-binding surface protein Cna, B-type domain|Immunoglobulin-like fold|Carboxypeptidase, regulatory domain	GO:0030246	NULL	NULL
Dr04440	GO:0005773|GO:0005524|GO:0017111	EC:3.6.1.15	vesicle-fusing atpase-like	IPR003959|IPR004201|IPR009010|IPR027417|IPR003593|IPR003960	ATPase, AAA-type, core|CDC48, domain 2|Aspartate decarboxylase-like domain|P-loop containing nucleoside triphosphate hydrolase|AAA+ ATPase domain|ATPase, AAA-type, conserved site	GO:0005524|GO:0000166|GO:0017111	NULL	NULL
Dr04378	GO:0010072	NULL	topless-related protein 3-like	IPR027728|IPR001680|IPR017986|IPR015943|IPR006594|IPR006595|IPR019775	Topless family|WD40 repeat|WD40-repeat-containing domain|WD40/YVTN repeat-like-containing domain|LisH dimerisation motif|CTLH, C-terminal LisH motif|WD40 repeat, conserved site	GO:0006355|GO:0005515	NULL	NULL
Dr04441	GO:0005739	NULL	pentatricopeptide repeat-containing protein	IPR002885|IPR011990	Pentatricopeptide repeat|Tetratricopeptide-like helical	GO:0005515	NULL	NULL
Dr04443	NULL	NULL	NULL	IPR002885|IPR011990	Pentatricopeptide repeat|Tetratricopeptide-like helical	GO:0005515	NULL	NULL
Dr04478	GO:0046872|GO:0004722|GO:0050688|GO:0006470|GO:0008287	NULL	protein phosphatase 2c	IPR015655|IPR001932|IPR000222	Protein phosphatase 2C|Protein phosphatase 2C (PP2C)-like domain|Protein phosphatase 2C, manganese/magnesium aspartate binding site	GO:0003824|GO:0004722|GO:0006470	NULL	NULL
Dr17723	GO:0005739	NULL	oleosin 16 kda-like	IPR000136	Oleosin	GO:0012511|GO:0016021	NULL	NULL
Dr17736	GO:0032259|GO:0008168	EC:2.1.1.0	protein arginine n-methyltransferase	IPR025799|IPR014644|IPR025802	Protein arginine N-methyltransferase|Protein arginine N-methyltransferase PRMT7|Protein arginine N-methyltransferase PRMT7, plants	GO:0006479|GO:0008168	EC:2.1.1.-	KEGG: 00130+2.1.1.-|KEGG: 00253+2.1.1.-|KEGG: 00270+2.1.1.-|KEGG: 00340+2.1.1.-|KEGG: 00350+2.1.1.-|KEGG: 00360+2.1.1.-|KEGG: 00380+2.1.1.-|KEGG: 00450+2.1.1.-|KEGG: 00522+2.1.1.-|KEGG: 00624+2.1.1.-|KEGG: 00627+2.1.1.-|KEGG: 00860+2.1.1.-|KEGG: 00940+2.1.1.-|KEGG: 00941+2.1.1.-|KEGG: 00942+2.1.1.-|KEGG: 00945+2.1.1.-|KEGG: 00950+2.1.1.-|KEGG: 00981+2.1.1.-
Dr17744	GO:0044444|GO:0043231|GO:0008236	NULL	acylamino-acid-releasing enzyme	IPR001375|IPR011042|IPR002471	Peptidase S9, prolyl oligopeptidase, catalytic domain|Six-bladed beta-propeller, TolB-like|Peptidase S9, serine active site	GO:0006508|GO:0008236|GO:0004252	NULL	NULL
Dr04561	GO:0009536	NULL	pentatricopeptide repeat-containing protein	IPR002885|IPR011990	Pentatricopeptide repeat|Tetratricopeptide-like helical	GO:0005515	NULL	NULL
Dr04597	NULL	NULL	NULL	NULL	NULL	NULL	NULL	NULL
Dr04593	GO:0044699|GO:0009987|GO:1901363|GO:0005634|GO:0097159	NULL	rna recognition motif-containing protein	IPR000504|IPR012677	RNA recognition motif domain|Nucleotide-binding, alpha-beta plait	GO:0003676|GO:0000166	NULL	NULL
Dr04588	GO:0044699|GO:0050794|GO:0032502	NULL	flowering locus t	IPR008914|IPR003441|IPR001858	Phosphatidylethanolamine-binding protein PEBP|NAC domain|Phosphatidylethanolamine-binding, conserved site	GO:0003677|GO:0006355	NULL	NULL
Dr25415	GO:0016747|GO:0003677|GO:0008270|GO:0006355	EC:2.3.1.0	dof zinc finger protein	IPR003851	Zinc finger, Dof-type	GO:0003677|GO:0006355	NULL	NULL
Dr18105	GO:0002161|GO:0004823|GO:0006450|GO:0005524|GO:0006429|GO:0009507|GO:0009097|GO:0009098|GO:0009099	EC:6.1.1.4	leucyl-trna cytoplasmic-like	IPR002300|IPR013155|IPR009080|IPR009008|IPR014729|IPR004493|IPR001412	Aminoacyl-tRNA synthetase, class Ia|Valyl/Leucyl/Isoleucyl-tRNA synthetase, class I, anticodon-binding|Aminoacyl-tRNA synthetase, class 1a, anticodon-binding|Valyl/Leucyl/Isoleucyl-tRNA synthetase, editing domain|Rossmann-like alpha/beta/alpha sandwich fold|Leucyl-tRNA synthetase, class Ia, archaeal/eukaryotic cytosolic|Aminoacyl-tRNA synthetase, class I, conserved site	GO:0000166|GO:0004812|GO:0005524|GO:0006418|GO:0002161|GO:0004823|GO:0005737|GO:0006429	EC:6.1.1.4	Reactome: REACT_71|KEGG: 00970+6.1.1.4
Dr18155	GO:0009414|GO:0005975|GO:0008184|GO:0030170|GO:0046686|GO:0009507	NULL	alpha-glucan h isozyme-like	IPR000811|IPR011833	Glycosyl transferase, family 35|Glycogen/starch/alpha-glucan phosphorylase	GO:0005975|GO:0008184|GO:0004645|GO:0030170	EC:2.4.1.1	KEGG: 00500+2.4.1.1|MetaCyc: PWY-5941|MetaCyc: PWY-622|MetaCyc: PWY-6731|MetaCyc: PWY-6737|MetaCyc: PWY-7238|Reactome: REACT_474
Dr18190	GO:0009534|GO:0031977	NULL	protein	IPR001646	Pentapeptide repeat	NULL	NULL	NULL
Dr18244	NULL	NULL	NULL	IPR004365|IPR012340	OB-fold nucleic acid binding domain, AA-tRNA synthetase-type|Nucleic acid-binding, OB-fold	GO:0003676	NULL	NULL
Dr18251	NULL	NULL	NULL	IPR001680|IPR017986|IPR015943|IPR019775	WD40 repeat|WD40-repeat-containing domain|WD40/YVTN repeat-like-containing domain|WD40 repeat, conserved site	GO:0005515	NULL	NULL
Dr18285	GO:0006629|GO:0016740|GO:0009536	NULL	#NAME?	IPR004095|IPR007685|IPR012676|IPR012675|IPR003607	TGS|RelA/SpoT|TGS-like|Beta-grasp domain|HD/PDEase domain	GO:0015969|GO:0003824	EC:6.1.1.3	KEGG: 00970+6.1.1.3
Dr18297	GO:0032991|GO:0044424	NULL	u3 small nucleolar rna-associated protein	IPR006709	Small-subunit processome, Utp14	GO:0006364|GO:0032040	NULL	NULL
Dr18265	GO:0046872	NULL	programmed cell death protein 2-like	IPR002893|IPR007320	Zinc finger, MYND-type|Programmed cell death protein 2, C-terminal	GO:0005737	NULL	NULL
Dr18296	GO:0016023|GO:0007275	NULL	auxin-independent growth promoter protein	IPR019378	GDP-fucose protein O-fucosyltransferase	NULL	EC:2.4.1.221	KEGG: 00514+2.4.1.221|UniPathway: UPA00378
Dr18303	GO:0009987|GO:0005739|GO:0016772|GO:0000166	NULL	ubiquitin carboxyl-terminal hydrolase-like protein	IPR021099	Plant organelle RNA recognition domain	NULL	NULL	NULL
Dr04703	GO:0008233|GO:0009451|GO:0016798|GO:0016462|GO:0016853	NULL	rna pseudourine synthase 1-like	IPR006145|IPR020103|IPR006224	Pseudouridine synthase, RsuA/RluB/C/D/E/F|Pseudouridine synthase, catalytic domain|Pseudouridine synthase, RluC/RluD, conserved site	GO:0001522|GO:0003723|GO:0009451|GO:0009982	NULL	NULL
Dr04732	GO:0044444	NULL	zinc ion binding protein	IPR003690|IPR012935	Mitochodrial transcription termination factor-related|Zinc finger, C3HC-like	GO:0005634|GO:0008270	NULL	NULL
Dr04711	GO:0006468|GO:0004674|GO:0016023|GO:0005524|GO:0004713|GO:0009069	EC:2.7.11.0|EC:2.7.10.0	probable receptor-like protein kinase at1g30570-like	IPR001245|IPR024788|IPR011009|IPR013320|IPR002290|IPR000719|IPR017441|IPR008271	Serine-threonine/tyrosine-protein kinase catalytic domain|Malectin-like carbohydrate-binding domain|Protein kinase-like domain|Concanavalin A-like lectin/glucanase, subgroup|Serine/threonine- / dual specificity protein kinase, catalytic domain|Protein kinase domain|Protein kinase, ATP binding site|Serine/threonine-protein kinase, active site	GO:0004672|GO:0006468|GO:0016772|GO:0005524|GO:0004674	NULL	NULL
Dr04726	GO:0010231|GO:0010023|GO:0015238|GO:0006855|GO:0009705|GO:0015299|GO:0006812|GO:0006885	NULL	transparent testa 12	IPR002528	Multi antimicrobial extrusion protein	GO:0006855|GO:0015238|GO:0015297|GO:0016020|GO:0055085	NULL	Reactome: REACT_15518|Reactome: REACT_20633
Dr04736	GO:0009941|GO:0005773|GO:0016023|GO:0005886	NULL	pentatricopeptide repeat-containing protein	IPR002885	Pentatricopeptide repeat	NULL	NULL	NULL
Dr18323	GO:0009536	NULL	pentatricopeptide repeat-containing protein	IPR002885|IPR011990	Pentatricopeptide repeat|Tetratricopeptide-like helical	GO:0005515	NULL	NULL
Dr18426	NULL	NULL	NULL	IPR006460	Protein of unknown function DUF617, plant	NULL	NULL	NULL
Dr04800	GO:0016627|GO:0004129|GO:0005751|GO:0006784|GO:0009060|GO:0006123|GO:0015992	EC:1.9.3.1	cytochrome c oxidase assembly protein cox15-like	IPR003780	Heme A synthase	GO:0006784|GO:0016020|GO:0016627|GO:0055114	EC:1.3.-.-	KEGG: 00351+1.3.-.-|KEGG: 00363+1.3.-.-|KEGG: 00624+1.3.-.-|UniPathway: UPA00269
Dr04794	GO:0006508|GO:0004190	EC:3.4.23.0	dna damage-inducible protein 1	IPR000626|IPR000449|IPR019103|IPR009060|IPR021109|IPR015940|IPR019955	Ubiquitin domain|Ubiquitin-associated domain/translation elongation factor EF-Ts, N-terminal|Aspartic peptidase, DDI1-type|UBA-like|Aspartic peptidase domain|Ubiquitin-associated/translation elongation factor EF1B, N-terminal, eukaryote|Ubiquitin supergroup	GO:0005515|GO:0004190|GO:0006508	NULL	NULL
Dr04821	GO:0016023|GO:0016021|GO:0005773|GO:0005794|GO:0005886	NULL	transmembrane 9 superfamily member 4-like	IPR004240	Nonaspanin (TM9SF)	GO:0016021	NULL	NULL
Dr04829	NULL	NULL	NULL	IPR024867	Nuclear factor related to kappa-B-binding protein	GO:0031011	NULL	NULL
Dr04853	NULL	NULL	NULL	IPR012458	Protein of unknown function DUF1664	NULL	NULL	NULL
Dr04852	GO:0016023	NULL	bpi lbp family protein at3g20270-like	IPR017942|IPR001124|IPR017943|IPR001279	Lipid-binding serum glycoprotein, N-terminal|Lipid-binding serum glycoprotein, C-terminal|Bactericidal permeability-increasing protein, alpha/beta domain|Beta-lactamase-like	GO:0008289|GO:0016787	NULL	NULL
Dr04910	NULL	NULL	NULL	IPR026532|IPR007109|IPR004154	Ribosome biogenesis protein BRX1|Brix domain|Anticodon-binding	NULL	NULL	NULL
Dr04960	GO:0008233|GO:0016491|GO:0016023|GO:0008152	NULL	protein	IPR013128|IPR000668|IPR000118|IPR013201|IPR000169|IPR025660|IPR025661	Peptidase C1A, papain|Peptidase C1A, papain C-terminal|Granulin|Proteinase inhibitor I29, cathepsin propeptide|Cysteine peptidase, cysteine active site|Cysteine peptidase, histidine active site|Cysteine peptidase, asparagine active site	GO:0008234|GO:0006508	NULL	NULL
Dr04919	NULL	NULL	NULL	IPR003690	Mitochodrial transcription termination factor-related	NULL	NULL	NULL
Dr18618	GO:0005730|GO:0003743|GO:0009615|GO:0005840|GO:0006446	NULL	eukaryotic translation initiation factor 4e	IPR001040|IPR023398|IPR019770	Translation Initiation factor eIF- 4e|Translation Initiation factor eIF- 4e-like domain|Eukaryotic translation initiation factor 4E (eIF-4E), conserved site	GO:0003723|GO:0003743|GO:0005737|GO:0006413	NULL	NULL
Dr18685	NULL	NULL	NULL	IPR019787|IPR011011|IPR013083|IPR001965|IPR019786	Zinc finger, PHD-finger|Zinc finger, FYVE/PHD-type|Zinc finger, RING/FYVE/PHD-type|Zinc finger, PHD-type|Zinc finger, PHD-type, conserved site	GO:0005515|GO:0008270	NULL	NULL
Dr18687	GO:0016020	NULL	transmembrane anterior posterior transformation protein	IPR008010	Membrane protein,Tapt1/CMV receptor	NULL	NULL	NULL
Dr18656	GO:0004672|GO:0010051|GO:0016491|GO:0016023|GO:0009755|GO:0000166|GO:0016310|GO:0016020	NULL	serine threonine-protein kinase bri1-like 2	IPR000719|IPR001611|IPR013210|IPR025875|IPR011009|IPR013320|IPR002290|IPR003591|IPR017441|IPR008271	Protein kinase domain|Leucine-rich repeat|Leucine-rich repeat-containing N-terminal, type 2|Leucine rich repeat 4|Protein kinase-like domain|Concanavalin A-like lectin/glucanase, subgroup|Serine/threonine- / dual specificity protein kinase, catalytic domain|Leucine-rich repeat, typical subtype|Protein kinase, ATP binding site|Serine/threonine-protein kinase, active site	GO:0004672|GO:0005524|GO:0006468|GO:0005515|GO:0016772|GO:0004674	NULL	NULL
Dr18651	NULL	NULL	NULL	IPR002885|IPR011990	Pentatricopeptide repeat|Tetratricopeptide-like helical	GO:0005515	NULL	NULL
Dr18717	NULL	NULL	NULL	IPR000008	C2 domain	GO:0005515	NULL	NULL
Dr18773	NULL	NULL	NULL	IPR015419	EKC/KEOPS complex, subunit Pcc1	NULL	NULL	NULL
Dr18767	GO:0009941|GO:0016671|GO:0009055|GO:0045454|GO:0006662|GO:0009570|GO:0015035|GO:0022900|GO:0006118	EC:1.8.4.0	thioredoxin-like protein cdsp32	IPR005746|IPR013766|IPR012336	Thioredoxin|Thioredoxin domain|Thioredoxin-like fold	GO:0006662|GO:0015035|GO:0045454	NULL	NULL
Dr18772	GO:0003964|GO:0006278|GO:0003723|GO:0005739	EC:2.7.7.49	ddb1- and cul4-associated factor 8-like	IPR001680|IPR017986|IPR015943	WD40 repeat|WD40-repeat-containing domain|WD40/YVTN repeat-like-containing domain	GO:0005515	NULL	NULL
Dr04992	GO:0006810|GO:0042626|GO:0043190|GO:0005524	NULL	abc transporter g family member 7	IPR003439|IPR013525|IPR027417|IPR003593	ABC transporter-like|ABC-2 type transporter|P-loop containing nucleoside triphosphate hydrolase|AAA+ ATPase domain	GO:0005524|GO:0016887|GO:0016020|GO:0000166|GO:0017111	NULL	NULL
Dr05012	NULL	NULL	NULL	NULL	NULL	NULL	NULL	NULL
Dr04974	GO:0009536|GO:0043190|GO:0006265|GO:0015416|GO:0006200|GO:0005524|GO:0003918|GO:0005739|GO:0015716|GO:0015748	EC:3.6.3.28|EC:5.99.1.3	abc transporter	IPR003439|IPR027417|IPR003593|IPR017871	ABC transporter-like|P-loop containing nucleoside triphosphate hydrolase|AAA+ ATPase domain|ABC transporter, conserved site	GO:0005524|GO:0016887|GO:0000166|GO:0017111	NULL	NULL
Dr05027	GO:0005622	NULL	protein	NULL	NULL	NULL	NULL	NULL
Dr05038	GO:0006633|GO:0055114|GO:0016021|GO:0000248|GO:0005789|GO:0050046|GO:0005506|GO:0016126	EC:1.14.21.6	delta-7-sterol-c5	NULL	NULL	NULL	NULL	NULL
Dr05083	GO:0016740	NULL	pentatricopeptide repeat-containing protein	NULL	NULL	NULL	NULL	NULL
Dr05087	NULL	NULL	NULL	NULL	NULL	NULL	NULL	NULL
Dr05079	GO:0032301|GO:0030983|GO:0032302|GO:0005524|GO:0006298|GO:0045128|GO:0005886	NULL	dna mismatch repair protein msh2	NULL	NULL	NULL	NULL	NULL
Dr05132	GO:0005773|GO:0006508|GO:0009536|GO:0004177	EC:3.4.11.0	peptidase family protein	NULL	NULL	NULL	NULL	NULL
Dr05136	GO:0005739	NULL	protein dgcr14	NULL	NULL	NULL	NULL	NULL
Dr00019	NULL	NULL	NULL	IPR001810|IPR015915	F-box domain|Kelch-type beta propeller	GO:0005515	NULL	NULL
Dr00032	GO:0005739	NULL	protein	NULL	NULL	NULL	NULL	NULL
Dr00038	GO:0016023	NULL	uncharacterized membrane protein at1g75140-like	IPR017986	WD40-repeat-containing domain	GO:0005515	NULL	NULL
Dr00095	GO:0016020	NULL	uncharacterized protein	IPR002133|IPR022630|IPR022636	S-adenosylmethionine synthetase|S-adenosylmethionine synthetase, C-terminal|S-adenosylmethionine synthetase superfamily	GO:0004478|GO:0005524|GO:0006556	EC:2.5.1.6	KEGG: 00270+2.5.1.6|MetaCyc: PWY-5041|MetaCyc: PWY-5912|MetaCyc: PWY-7270|Reactome: REACT_13433|UniPathway: UPA00315
Dr00120	GO:0016787	NULL	histone deacetylase	IPR000286|IPR023801|IPR007053	Histone deacetylase superfamily|Histone deacetylase domain|LRAT-like domain	NULL	NULL	NULL
Dr00114	NULL	NULL	NULL	IPR002885|IPR011990	Pentatricopeptide repeat|Tetratricopeptide-like helical	GO:0005515	NULL	NULL
Dr00177	GO:0046488|GO:0044763|GO:0009856|GO:0016307|GO:0044767|GO:0016310|GO:0009653|GO:0016043|GO:0044707|GO:0005886	NULL	phosphatidylinositol-4-phosphate 5-kinase	IPR023610|IPR002498|IPR003409|IPR027484|IPR027483|IPR016034|IPR017163	Phosphatidylinositol-4-phosphate 5-kinase|Phosphatidylinositol-4-phosphate 5-kinase, core|MORN motif|Phosphatidylinositol-4-phosphate 5-kinase, N-terminal domain|Phosphatidylinositol-4-phosphate 5-kinase, C-terminal|Phosphatidylinositol-4-phosphate 5-kinase, core, subgroup|Phosphatidylinositol-4-phosphate 5-kinase, plant	GO:0016307|GO:0046488|GO:0005524|GO:0016308	EC:2.7.1.68	KEGG: 00562+2.7.1.68|MetaCyc: PWY-6351|MetaCyc: PWY-6352
Dr00180	GO:0016301|GO:0000166	NULL	serine threonine-protein kinase-like protein at3g51990-like	IPR001245|IPR011009|IPR002290|IPR000719|IPR017441|IPR008271	Serine-threonine/tyrosine-protein kinase catalytic domain|Protein kinase-like domain|Serine/threonine- / dual specificity protein kinase, catalytic domain|Protein kinase domain|Protein kinase, ATP binding site|Serine/threonine-protein kinase, active site	GO:0004672|GO:0006468|GO:0016772|GO:0005524|GO:0004674	NULL	NULL
Dr00183	NULL	NULL	NULL	IPR000008	C2 domain	GO:0005515	NULL	NULL
Dr18947	NULL	NULL	NULL	NULL	NULL	NULL	NULL	NULL
Dr18952	NULL	NULL	NULL	IPR006904	Protein of unknown function DUF716, TMEM45	NULL	NULL	NULL
Dr18953	GO:0016020	NULL	protein	IPR006904	Protein of unknown function DUF716, TMEM45	NULL	NULL	NULL
Dr18956	NULL	NULL	NULL	NULL	NULL	NULL	NULL	NULL
Dr18909	GO:0009734|GO:0005739|GO:0005516	NULL	saur33 - auxin-responsive saur family member	IPR003676	Auxin-induced protein, ARG7	NULL	NULL	NULL
Dr18915	NULL	NULL	NULL	NULL	NULL	NULL	NULL	NULL
Dr18900	GO:0046872	NULL	protein	IPR002867|IPR013083|IPR001841|IPR017907	Zinc finger, C6HC-type|Zinc finger, RING/FYVE/PHD-type|Zinc finger, RING-type|Zinc finger, RING-type, conserved site	GO:0008270|GO:0005515	NULL	NULL
Dr18917	GO:0016301|GO:0016310|GO:0046474	NULL	probable ethanolamine kinase a-like	IPR011009	Protein kinase-like domain	GO:0016772	NULL	NULL
Dr19012	GO:0009725|GO:0008295|GO:0006527|GO:0008792|GO:1901700|GO:0006970|GO:0006560	EC:4.1.1.19	arginine decarboxylase	IPR022643|IPR022644|IPR009006|IPR000183|IPR002985|IPR022653	Orn/DAP/Arg decarboxylase 2, C-terminal|Orn/DAP/Arg decarboxylase 2, N-terminal|Ornithine/DAP/Arg decarboxylase|Arginine decarboxylase|Alanine racemase/group IV decarboxylase, C-terminal|Orn/DAP/Arg decarboxylase 2, pyridoxal-phosphate binding site	GO:0003824|GO:0006527|GO:0008295|GO:0008792	EC:4.1.1.19	Reactome: REACT_13|KEGG: 00330+4.1.1.19|MetaCyc: PWY-40|MetaCyc: PWY-43|MetaCyc: PWY-6305|MetaCyc: PWY-6834
Dr19014	NULL	NULL	NULL	IPR001680|IPR017986|IPR015943|IPR020472|IPR019775	WD40 repeat|G-protein beta WD-40 repeat|WD40-repeat-containing domain|WD40/YVTN repeat-like-containing domain|WD40 repeat, conserved site	GO:0005515	NULL	NULL
Dr19028	GO:0080042|GO:0005739|GO:0080041|GO:0009507	NULL	nudix hydrolase chloroplastic-like	IPR015797	NUDIX hydrolase domain-like	GO:0016787	NULL	NULL
Dr19044	GO:0044260|GO:0032259|GO:0008168|GO:0044238	EC:2.1.1.0	pentatricopeptide repeat-containing protein	IPR002885|IPR011990	Pentatricopeptide repeat|Tetratricopeptide-like helical	GO:0005515	NULL	NULL
Dr19098	GO:0009536|GO:0016740	NULL	gcn5-related n-acetyltransferase family-like protein	IPR000182|IPR016181	GNAT domain|Acyl-CoA N-acyltransferase	GO:0008080	NULL	NULL
Dr19116	GO:0046983|GO:0009536	NULL	transcription factor hec3	IPR011598	Myc-type, basic helix-loop-helix (bHLH) domain	GO:0046983	NULL	NULL
Dr19094	GO:0044260|GO:0090304|GO:0003677|GO:0006974	NULL	chain structure of the plant transcriptional regulator pbf-2	IPR013742|IPR009044	Plant transcription factor|ssDNA-binding transcriptional regulator	GO:0003677|GO:0006355	NULL	NULL
Dr19096	GO:0007275|GO:0071944	NULL	protein	IPR013932|IPR016024|IPR011989	TATA-binding protein interacting (TIP20)|Armadillo-type fold|Armadillo-like helical	GO:0005488	NULL	NULL
Dr19103	GO:0005840|GO:0003735|GO:0006412|GO:0005739|GO:0042254	NULL	ribosomal protein l12 atp-dependent clp protease adaptor protein	IPR015608|IPR013823|IPR014719	Putative ribosomal protein L7/L12, plants|Ribosomal protein L7/L12, C-terminal|Ribosomal protein L7/L12, C-terminal/adaptor protein ClpS-like	GO:0003735|GO:0005622|GO:0005840|GO:0006412	NULL	NULL
Dr05205	GO:0005739	NULL	pentatricopeptide repeat-containing protein	NULL	NULL	NULL	NULL	NULL
Dr05274	GO:0044765|GO:0016020	NULL	sucrose transporter	NULL	NULL	NULL	NULL	NULL
Dr05291	GO:0004252|GO:0009840|GO:0050897|GO:0005759|GO:0006508|GO:0008270|GO:0009535	EC:3.4.21.0	atp-dependent clp protease proteolytic subunit	NULL	NULL	NULL	NULL	NULL
Dr05385	GO:0003700|GO:0043565|GO:0006355|GO:0005667|GO:0045449	NULL	wuschel-related homeobox 13-like	NULL	NULL	NULL	NULL	NULL
Dr19163	GO:0005829|GO:0034480|GO:0009395|GO:0009628|GO:0009247|GO:0005773|GO:0016036|GO:0005886	EC:3.1.4.3	phospholipase c 3	IPR007312	Phosphoesterase	GO:0016788	NULL	NULL
Dr19197	GO:0009409|GO:0000024|GO:0016161|GO:0009570|GO:0000272|GO:0005982|GO:0005985	EC:3.2.1.2	beta-amylase	IPR001554|IPR017853|IPR013781|IPR018238	Glycoside hydrolase, family 14|Glycoside hydrolase, superfamily|Glycoside hydrolase, catalytic domain|Glycoside hydrolase, family 14, conserved site	GO:0000272|GO:0016161|GO:0003824|GO:0005975	EC:3.2.1.2	KEGG: 00500+3.2.1.2|MetaCyc: PWY-6724|MetaCyc: PWY-842
Dr19200	GO:0016020|GO:0016023	NULL	uncharacterized protein	NULL	NULL	NULL	NULL	NULL
Dr19309	GO:0016020	NULL	uncharacterized protein	NULL	NULL	NULL	NULL	NULL
Dr19376	GO:0044763|GO:0097159|GO:0043170|GO:0004386|GO:1901363|GO:0009507	NULL	dead-box atp-dependent rna helicase chloroplastic-like	IPR011545|IPR001650|IPR027417|IPR014001	DNA/RNA helicase, DEAD/DEAH box type, N-terminal|Helicase, C-terminal|P-loop containing nucleoside triphosphate hydrolase|Helicase, superfamily 1/2, ATP-binding domain	GO:0003676|GO:0005524|GO:0008026|GO:0004386	NULL	NULL
Dr19383	GO:0003676|GO:0008270|GO:0009536	NULL	protein	IPR021139	NYN domain, limkain-b1-type	NULL	NULL	NULL
Dr05412	GO:0044464	NULL	aspartic proteinase nepenthesin-2-like	NULL	NULL	NULL	NULL	NULL
Dr05414	GO:0005739	NULL	transcription termination factor domain-containing protein	NULL	NULL	NULL	NULL	NULL
Dr05482	GO:0009536	NULL	nucleotide binding	NULL	NULL	NULL	NULL	NULL
Dr05500	NULL	NULL	NULL	NULL	NULL	NULL	NULL	NULL
Dr19397	GO:0047617	EC:3.1.2.20	acyl-coenzyme a thioesterase 8-like	IPR003703|IPR000595|IPR018490|IPR014710|IPR018488	Acyl-CoA thioesterase|Cyclic nucleotide-binding domain|Cyclic nucleotide-binding-like|RmlC-like jelly roll fold|Cyclic nucleotide-binding, conserved site	GO:0006637|GO:0047617	NULL	NULL
Dr19428	GO:0010017|GO:0005773|GO:0005886|GO:0042644|GO:0005634	NULL	heme-binding-like protein	IPR006917|IPR011256	SOUL haem-binding protein|Regulatory factor, effector binding domain	NULL	NULL	NULL
Dr19439	GO:0055085|GO:0005315|GO:0031969|GO:0016021|GO:0006817	NULL	probable anion transporter chloroplastic-like	IPR011701|IPR016196|IPR020846	Major facilitator superfamily|Major facilitator superfamily domain, general substrate transporter|Major facilitator superfamily domain	GO:0016021|GO:0055085	NULL	NULL
Dr19446	GO:0009536	NULL	protein	IPR000008	C2 domain	GO:0005515	NULL	NULL
Dr19429	NULL	NULL	NULL	IPR019378	GDP-fucose protein O-fucosyltransferase	NULL	EC:2.4.1.221	KEGG: 00514+2.4.1.221|UniPathway: UPA00378
Dr19442	GO:0004553|GO:0005975|GO:0005773	EC:3.2.1.0	beta-d-glucan exohydrolase-like protein	IPR026892|IPR001764|IPR002772|IPR017853	Glycoside hydrolase family 3|Glycoside hydrolase, family 3, N-terminal|Glycoside hydrolase family 3 C-terminal domain|Glycoside hydrolase, superfamily	GO:0004553|GO:0005975	NULL	NULL
Dr19501	NULL	NULL	NULL	NULL	NULL	NULL	NULL	NULL
Dr19498	NULL	NULL	NULL	IPR000270	Phox/Bem1p	GO:0005515	NULL	NULL
Dr19510	NULL	NULL	NULL	IPR022251	Protein of unknown function wound-induced	NULL	NULL	NULL
Dr05537	NULL	NULL	NULL	NULL	NULL	NULL	NULL	NULL
Dr05525	NULL	NULL	NULL	NULL	NULL	NULL	NULL	NULL
Dr05565	GO:0004252|GO:0016023|GO:0005618|GO:0006508	EC:3.4.21.0	subtilisin-like protease	NULL	NULL	NULL	NULL	NULL
Dr05550	NULL	NULL	NULL	NULL	NULL	NULL	NULL	NULL
Dr05654	GO:0009409|GO:0000038|GO:0042335|GO:0030497|GO:0009922|GO:0009416|GO:0009923|GO:0042967	NULL	3-ketoacyl- synthase 4-like	NULL	NULL	NULL	NULL	NULL
Dr05684	NULL	NULL	NULL	NULL	NULL	NULL	NULL	NULL
Dr05548	GO:1901363|GO:0097159|GO:0005739|GO:0016772	NULL	pentatricopeptide repeat-containing protein at3g15130-like	NULL	NULL	NULL	NULL	NULL
Dr19701	NULL	NULL	NULL	NULL	NULL	NULL	NULL	NULL
Dr19714	NULL	NULL	NULL	IPR006285|IPR000594|IPR009036|IPR016040	Ubiquitin-like modifier-activating enzyme Atg7|UBA/THIF-type NAD/FAD binding fold|Molybdenum cofactor biosynthesis, MoeB|NAD(P)-binding domain	GO:0005737|GO:0006914|GO:0003824	NULL	NULL
Dr19730	GO:0005739|GO:0006200|GO:0005524|GO:0016887|GO:0046686	EC:3.6.1.3	abc transporter family protein	IPR003439|IPR027417|IPR003593|IPR017871	ABC transporter-like|P-loop containing nucleoside triphosphate hydrolase|AAA+ ATPase domain|ABC transporter, conserved site	GO:0005524|GO:0016887|GO:0000166|GO:0017111	NULL	NULL
Dr19734	GO:0003677|GO:0004518|GO:0006281	NULL	flap endonuclease gen-like 2	IPR006084|IPR006086|IPR020045	XPG/Rad2 endonuclease|XPG-I domain|5'-3' exonuclease, C-terminal domain	GO:0004518|GO:0006281|GO:0003677|GO:0003824	NULL	NULL
Dr19746	GO:0044763|GO:0008324|GO:0044446|GO:0000166|GO:0009507|GO:0006812|GO:0016020	NULL	k(+) efflux antiporter chloroplastic-like	IPR006153|IPR003148|IPR004326|IPR016040	Cation/H+ exchanger|Regulator of K+ conductance, N-terminal|Mlo-related protein|NAD(P)-binding domain	GO:0006812|GO:0015299|GO:0016021|GO:0055085|GO:0006813|GO:0006952	NULL	NULL
Dr19802	NULL	NULL	NULL	IPR001440|IPR011990|IPR019734|IPR013026	Tetratricopeptide TPR1|Tetratricopeptide-like helical|Tetratricopeptide repeat|Tetratricopeptide repeat-containing domain	GO:0005515	NULL	NULL
Dr19827	NULL	NULL	NULL	IPR013069|IPR011333|IPR000210	BTB/POZ|BTB/POZ fold|BTB/POZ-like	GO:0005515	NULL	NULL
Dr19832	NULL	NULL	NULL	IPR002885|IPR011990	Pentatricopeptide repeat|Tetratricopeptide-like helical	GO:0005515	NULL	NULL
Dr19837	GO:0043234|GO:0015630|GO:0044763|GO:0000166|GO:0044430	NULL	kinesin family member 2 24	IPR027640|IPR001752|IPR027417|IPR019821	Kinesin-like protein|Kinesin, motor domain|P-loop containing nucleoside triphosphate hydrolase|Kinesin, motor region, conserved site	GO:0003777|GO:0005871|GO:0007018|GO:0005524|GO:0008017	NULL	NULL
Dr05724	GO:0005509|GO:0006184|GO:0003924|GO:0005525	NULL	eps15 homology domain 1 protein	NULL	NULL	NULL	NULL	NULL
Dr05734	GO:0006357|GO:0001104|GO:0016592	NULL	uncharacterized protein	NULL	NULL	NULL	NULL	NULL
Dr05710	NULL	NULL	NULL	NULL	NULL	NULL	NULL	NULL
Dr05732	GO:0005739	NULL	uncharacterized protein	NULL	NULL	NULL	NULL	NULL
Dr05761	GO:0030942|GO:0006614|GO:0005786|GO:0005047|GO:0008312	NULL	signal recognition particle 68 kda	NULL	NULL	NULL	NULL	NULL
Dr05817	GO:0009536	NULL	zinc finger protein chloroplastic-like	NULL	NULL	NULL	NULL	NULL
Dr19953	GO:0003676|GO:0005622|GO:0010200|GO:0008270	NULL	protein sensitive to proton rhizotoxicity 1-like	IPR007087|IPR013087|IPR015880	Zinc finger, C2H2|Zinc finger C2H2-type/integrase DNA-binding domain|Zinc finger, C2H2-like	GO:0046872|GO:0003676	NULL	NULL
Dr19982	GO:0016070|GO:0071840|GO:0009536|GO:0010467	NULL	suppressor of variegation1 causing pseudouridine synthase-like protein	IPR002942|IPR020103	RNA-binding S4 domain|Pseudouridine synthase, catalytic domain	GO:0003723|GO:0001522|GO:0009451|GO:0009982	NULL	NULL
Dr20053	GO:0005618|GO:0051536|GO:0009113|GO:0046872|GO:0009532|GO:0009965|GO:0009116|GO:0009507|GO:0004044|GO:0006189|GO:0006536|GO:0006541	EC:2.4.2.14	amidophosphoribosyltransferase	IPR000836|IPR000583|IPR005854|IPR017932	Phosphoribosyltransferase domain|Class II glutamine amidotransferase domain|Amidophosphoribosyl transferase|Glutamine amidotransferase type 2 domain	GO:0009116|GO:0008152|GO:0004044|GO:0009113	EC:2.4.2.14	KEGG: 00230+2.4.2.14|KEGG: 00250+2.4.2.14|MetaCyc: PWY-6121|MetaCyc: PWY-6122|MetaCyc: PWY-6277|UniPathway: UPA00074
Dr20063	GO:0050896|GO:0046872|GO:0005634	NULL	c2-h2 zinc finger protein	IPR013087|IPR015880|IPR007087	Zinc finger C2H2-type/integrase DNA-binding domain|Zinc finger, C2H2-like|Zinc finger, C2H2	GO:0003676|GO:0046872	NULL	NULL
Dr05884	NULL	NULL	NULL	NULL	NULL	NULL	NULL	NULL
Dr05914	NULL	NULL	NULL	NULL	NULL	NULL	NULL	NULL
Dr05880	GO:0008233	NULL	aspartic proteinase nepenthesin-2	NULL	NULL	NULL	NULL	NULL
Dr05883	GO:0008026|GO:0003676|GO:0005524|GO:0009536	NULL	nuclear deih-boxhelicase	NULL	NULL	NULL	NULL	NULL
Dr05959	GO:0008270	NULL	ring-h2 finger protein atl65-like	NULL	NULL	NULL	NULL	NULL
Dr06081	GO:0009536|GO:0006184|GO:0042254|GO:0003924|GO:0005525	NULL	ribosome biogenesis gtp-binding protein	IPR006073|IPR004265|IPR027417|IPR023179|IPR019991	GTP binding domain|Plant disease resistance response protein|P-loop containing nucleoside triphosphate hydrolase|GTP-binding protein, orthogonal bundle domain|GTP-binding protein, ribosome biogenesis, YlqF	GO:0005525	NULL	NULL
Dr06101	GO:0019898|GO:0005509|GO:0009507|GO:0015979|GO:0009654	NULL	domain-containing protein	IPR002683|IPR016123	Photosystem II PsbP, oxygen evolving complex|Mog1/PsbP, alpha/beta/alpha sandwich	GO:0005509|GO:0009523|GO:0009654|GO:0015979|GO:0019898	NULL	NULL
Dr06055	NULL	NULL	NULL	IPR002885|IPR005227|IPR012337|IPR011990|IPR006641	Pentatricopeptide repeat|Resolvase, holliday junction-type, YqgF-like|Ribonuclease H-like domain|Tetratricopeptide-like helical|YqgF/RNase H-like domain	GO:0005737|GO:0006281|GO:0006310|GO:0006974|GO:0016788|GO:0003676|GO:0005515|GO:0006139	NULL	NULL
Dr06067	GO:0005886|GO:0006468|GO:0005524|GO:0004674|GO:0009069	EC:2.7.11.0	protein	IPR000719|IPR000858|IPR001480|IPR011009|IPR013320|IPR002290|IPR024171|IPR017441|IPR008271	Protein kinase domain|S-locus glycoprotein|Bulb-type lectin domain|Protein kinase-like domain|Concanavalin A-like lectin/glucanase, subgroup|Serine/threonine- / dual specificity protein kinase, catalytic domain|S-receptor-like serine/threonine-protein kinase|Protein kinase, ATP binding site|Serine/threonine-protein kinase, active site	GO:0004672|GO:0005524|GO:0006468|GO:0048544|GO:0016772|GO:0004674	NULL	NULL
Dr06093	GO:0006476|GO:0008270|GO:0031348|GO:0042742|GO:0070403|GO:0006471|GO:0005759|GO:0034979|GO:0005634	NULL	sirtuin 2	IPR003000|IPR026591|IPR026590|IPR026587	Sirtuin family|Sirtuin family, catalytic core small domain|Sirtuin family, catalytic core domain|Sirtuin family, class II	GO:0070403	EC:3.5.1.-	KEGG: 00240+3.5.1.-|KEGG: 00260+3.5.1.-|KEGG: 00364+3.5.1.-|KEGG: 00480+3.5.1.-|KEGG: 00520+3.5.1.-|KEGG: 00600+3.5.1.-|KEGG: 00760+3.5.1.-|KEGG: 00930+3.5.1.-
Dr06102	NULL	NULL	NULL	IPR004046|IPR004045|IPR010987|IPR012336	Glutathione S-transferase, C-terminal|Glutathione S-transferase, N-terminal|Glutathione S-transferase, C-terminal-like|Thioredoxin-like fold	GO:0005515	NULL	NULL
Dr06106	NULL	NULL	NULL	NULL	NULL	NULL	NULL	NULL
Dr05966	GO:0009978|GO:0031407|GO:0009753|GO:0006633|GO:0055114|GO:0009620|GO:0005739|GO:0009611|GO:0009941|GO:0016705|GO:0009055|GO:0004497|GO:0009535|GO:0047987|GO:0010287|GO:0020037|GO:0005506|GO:0006118	EC:4.2.1.92	allene oxide synthase	NULL	NULL	NULL	NULL	NULL
Dr05999	GO:0009536|GO:0016020	NULL	uncharacterized protein	NULL	NULL	NULL	NULL	NULL
Dr20128	NULL	NULL	NULL	IPR002885	Pentatricopeptide repeat	NULL	NULL	NULL
Dr20082	GO:0009536	NULL	pentatricopeptide repeat-containing protein	IPR002885|IPR011990	Pentatricopeptide repeat|Tetratricopeptide-like helical	GO:0005515	NULL	NULL
Dr20107	GO:0005739|GO:0009396|GO:0016874	NULL	folylpolyglutamate synthase	IPR001645|IPR013221|IPR004101|IPR023600|IPR018109	Folylpolyglutamate synthetase|Mur ligase, central|Mur ligase, C-terminal|Folylpolyglutamate synthase, eukaryota|Folylpolyglutamate synthetase, conserved site	GO:0004326|GO:0005524|GO:0009396|GO:0009058|GO:0016874	EC:6.3.2.17	KEGG: 00790+6.3.2.17|MetaCyc: PWY-2161|UniPathway: UPA00850|UniPathway: UPA00219
Dr20129	GO:0005488	NULL	protein phytoclock 1	IPR001005|IPR009057|IPR006447|IPR017930	SANT/Myb domain|Homeodomain-like|Myb domain, plants|Myb domain	GO:0003682|GO:0003677	NULL	NULL
Dr20137	NULL	NULL	NULL	IPR012552	DVL	NULL	NULL	NULL
Dr20085	GO:0055085|GO:0006468|GO:0004674|GO:0016021|GO:0005315|GO:0005524|GO:0031969|GO:0009069|GO:0006817	EC:2.7.11.0	anion transporter 4	IPR011701|IPR016196|IPR020846	Major facilitator superfamily|Major facilitator superfamily domain, general substrate transporter|Major facilitator superfamily domain	GO:0016021|GO:0055085	NULL	NULL
Dr20179	GO:0003723|GO:0006278|GO:0005739|GO:0003964|GO:0005524|GO:0006437|GO:0004831|GO:0009507|GO:0009793|GO:0000162|GO:0006571|GO:0009094	EC:2.7.7.49|EC:6.1.1.1	tyrosyl-trna synthetase-like	IPR024088|IPR002305|IPR002942|IPR014729|IPR002307|IPR001412|IPR024107	Tyrosine-tRNA ligase, bacterial-type|Aminoacyl-tRNA synthetase, class Ic|RNA-binding S4 domain|Tyrosine-tRNA ligase|Rossmann-like alpha/beta/alpha sandwich fold|Aminoacyl-tRNA synthetase, class I, conserved site|Tyrosine-tRNA ligase, bacterial-type, type 1	GO:0004831|GO:0000166|GO:0004812|GO:0005524|GO:0006418|GO:0003723|GO:0005737|GO:0006437	EC:6.1.1.1	KEGG: 00970+6.1.1.1|Reactome: REACT_71|KEGG: 00970+6.1.1.1|Reactome: REACT_71
Dr20189	NULL	NULL	NULL	IPR007274	Ctr copper transporter	GO:0005375|GO:0016021|GO:0035434	NULL	NULL
Dr20156	GO:0004252|GO:0016023|GO:0005618|GO:0008152	EC:3.4.21.0	subtilisin-like protease-like	IPR015500|IPR000209|IPR003137|IPR010259|IPR023828	Peptidase S8, subtilisin-related|Peptidase S8/S53 domain|Protease-associated domain, PA|Proteinase inhibitor I9|Peptidase S8, subtilisin, Ser-active site	GO:0004252|GO:0006508|GO:0042802|GO:0043086	NULL	NULL
Dr20168	GO:0003676	NULL	kh domain-containing protein	IPR004088|IPR004087	K Homology domain, type 1|K Homology domain	GO:0003723	NULL	NULL
Dr20178	NULL	NULL	NULL	IPR021099	Plant organelle RNA recognition domain	NULL	NULL	NULL
Dr20187	GO:0016020|GO:0016023|GO:0005488	NULL	tmem87a protein	IPR009637|IPR001564	Transmembrane receptor, eukaryota|Nucleoside diphosphate kinase	GO:0016021|GO:0004550|GO:0005524|GO:0006165|GO:0006183|GO:0006228|GO:0006241	EC:2.7.4.6	KEGG: 00230+2.7.4.6|KEGG: 00240+2.7.4.6|MetaCyc: PWY-6545|MetaCyc: PWY-7176|MetaCyc: PWY-7184|MetaCyc: PWY-7187|MetaCyc: PWY-7197|MetaCyc: PWY-7198|MetaCyc: PWY-7205|MetaCyc: PWY-7210|MetaCyc: PWY-7220|MetaCyc: PWY-7221|MetaCyc: PWY-7222|MetaCyc: PWY-7224|MetaCyc: PWY-7226|MetaCyc: PWY-7227
Dr20163	GO:0009408	NULL	kda class iii heat shock	IPR002068|IPR008978	Alpha crystallin/Hsp20 domain|HSP20-like chaperone	NULL	NULL	NULL
Dr20196	GO:0016023|GO:0009536	NULL	pentatricopeptide repeat-containing protein	IPR002885|IPR011990	Pentatricopeptide repeat|Tetratricopeptide-like helical	GO:0005515	NULL	NULL
Dr20318	GO:0006461|GO:0016023|GO:0016020	NULL	uncharacterized protein partial	IPR002541|IPR005018|IPR019545|IPR006593	Cytochrome c assembly protein|DOMON domain|DM13 domain|Cytochrome b561/ferric reductase transmembrane	GO:0006461|GO:0008535|GO:0016020	NULL	NULL
Dr20390	NULL	NULL	NULL	IPR000225|IPR016024|IPR011989	Armadillo|Armadillo-type fold|Armadillo-like helical	GO:0005515|GO:0005488	NULL	NULL
Dr06115	GO:0016023|GO:0016301|GO:0008152	NULL	phytosulfokine receptor precursor	IPR000719|IPR001611|IPR013210|IPR011009|IPR013320|IPR002290|IPR003591|IPR017441|IPR008271	Protein kinase domain|Leucine-rich repeat|Leucine-rich repeat-containing N-terminal, type 2|Protein kinase-like domain|Concanavalin A-like lectin/glucanase, subgroup|Serine/threonine- / dual specificity protein kinase, catalytic domain|Leucine-rich repeat, typical subtype|Protein kinase, ATP binding site|Serine/threonine-protein kinase, active site	GO:0004672|GO:0005524|GO:0006468|GO:0005515|GO:0016772|GO:0004674	NULL	NULL
Dr06140	GO:0005576|GO:0016020|GO:0043086|GO:0006508|GO:0042802|GO:0004252	EC:3.4.21.0	protein	IPR015500|IPR000209|IPR003137|IPR010259|IPR009020|IPR023828	Peptidase S8, subtilisin-related|Peptidase S8/S53 domain|Protease-associated domain, PA|Proteinase inhibitor I9|Proteinase inhibitor, propeptide|Peptidase S8, subtilisin, Ser-active site	GO:0004252|GO:0006508|GO:0042802|GO:0043086	NULL	NULL
Dr20429	GO:0016192|GO:0030133|GO:0005484|GO:0009860|GO:0006886|GO:0005886	NULL	syntaxin-124	IPR006011|IPR000727|IPR010989|IPR006012	Syntaxin, N-terminal domain|Target SNARE coiled-coil domain|t-SNARE|Syntaxin/epimorphin, conserved site	GO:0016020|GO:0005515|GO:0016192|GO:0005484|GO:0006886	NULL	Reactome: REACT_11184
Dr20404	GO:0009507	NULL	protein	IPR018962	Domain of unknown function DUF1995	NULL	NULL	NULL
Dr20420	GO:0005759|GO:0005525|GO:0005743|GO:0006184|GO:0043022|GO:0045727|GO:0003924	NULL	gtp-binding protein	IPR000795|IPR000640|IPR013842|IPR009000|IPR027417|IPR009022|IPR005225|IPR006297	Elongation factor, GTP-binding domain|Translation elongation factor EFG, V domain|GTP-binding protein LepA, C-terminal|Translation protein, beta-barrel domain|P-loop containing nucleoside triphosphate hydrolase|Elongation factor G, III-V domain|Small GTP-binding protein domain|Elongation factor 4	GO:0003924|GO:0005525	NULL	NULL
Dr20550	GO:1901363|GO:0097159	NULL	f-box family protein	IPR001810|IPR002182|IPR027417|IPR000767|IPR019955	F-box domain|NB-ARC|Disease resistance protein|P-loop containing nucleoside triphosphate hydrolase|Ubiquitin supergroup	GO:0005515|GO:0043531|GO:0006952	NULL	NULL
Dr20562	NULL	NULL	NULL	IPR002885|IPR011990	Pentatricopeptide repeat|Tetratricopeptide-like helical	GO:0005515	NULL	NULL
Dr20574	GO:0005739|GO:0005794	NULL	o-fucosyltransferase family protein	NULL	NULL	NULL	NULL	NULL
Dr20586	GO:0009987|GO:0009856|GO:0016757|GO:0016020|GO:0044707	NULL	phosphatidylinositol n-acetylglucosaminyltransferase subunit c	IPR009450	Phosphatidylinositol N-acetylglucosaminyltransferase subunit C	GO:0006506|GO:0016021|GO:0017176	EC:2.4.1.198	KEGG: 00563+2.4.1.198|UniPathway: UPA00196
Dr20589	GO:0005739	NULL	ubiquinol-cytochrome c chaperone family protein	IPR007129|IPR021150	Ubiquinol-cytochrome c chaperone, CBP3|Ubiquinol-cytochrome c chaperone/UPF0174	NULL	NULL	NULL
Dr06159	GO:0005975|GO:0004553	EC:3.2.1.0	hydrolyzing o-glycosyl	IPR001547|IPR000772|IPR017853|IPR013781	Glycoside hydrolase, family 5|Ricin B lectin domain|Glycoside hydrolase, superfamily|Glycoside hydrolase, catalytic domain	GO:0004553|GO:0005975|GO:0003824	NULL	NULL
Dr06164	NULL	NULL	NULL	IPR011989	Armadillo-like helical	NULL	NULL	NULL
Dr06202	GO:0005739|GO:0016020	NULL	uncharacterized protein	NULL	NULL	NULL	NULL	NULL
Dr06221	GO:0043234|GO:0044430|GO:0000166|GO:0015630	NULL	kinesin-like protein kif2a-like	IPR027640|IPR001752|IPR027417|IPR019821	Kinesin-like protein|Kinesin, motor domain|P-loop containing nucleoside triphosphate hydrolase|Kinesin, motor region, conserved site	GO:0003777|GO:0005871|GO:0007018|GO:0005524|GO:0008017	NULL	NULL
Dr06172	NULL	NULL	NULL	IPR011598	Myc-type, basic helix-loop-helix (bHLH) domain	GO:0046983	NULL	NULL
Dr06177	GO:0016740|GO:0046686	NULL	intracellular chloride channel-like protein	IPR016639|IPR004046|IPR004045|IPR010987|IPR012336	Glutathione S-transferase (GST)|Glutathione S-transferase, C-terminal|Glutathione S-transferase, N-terminal|Glutathione S-transferase, C-terminal-like|Thioredoxin-like fold	GO:0005515	EC:2.5.1.18	KEGG: 00480+2.5.1.18|KEGG: 00980+2.5.1.18|KEGG: 00982+2.5.1.18|MetaCyc: PWY-4061|MetaCyc: PWY-6842|MetaCyc: PWY-7112
Dr06312	NULL	NULL	NULL	IPR007493	Protein of unknown function DUF538	NULL	NULL	NULL
Dr06322	GO:0015171|GO:0044464|GO:0006865|GO:0016020	NULL	uncharacterized amino acid permease -like	IPR002293	Amino acid/polyamine transporter I	GO:0003333|GO:0015171|GO:0016020	NULL	NULL
Dr06329	NULL	NULL	NULL	IPR016696|IPR007194|IPR024096	TRAPP I complex, subunit 5|Transport protein particle (TRAPP) component|NO signalling/Golgi transport ligand-binding domain	NULL	NULL	NULL
Dr06307	GO:0004386|GO:0000166	NULL	atp-dependent rna	IPR001650|IPR007502|IPR011709|IPR027417|IPR014001|IPR002464	Helicase, C-terminal|Helicase-associated domain|Domain of unknown function DUF1605|P-loop containing nucleoside triphosphate hydrolase|Helicase, superfamily 1/2, ATP-binding domain|DNA/RNA helicase, ATP-dependent, DEAH-box type, conserved site	GO:0003676|GO:0004386|GO:0005524|GO:0008026	NULL	NULL
Dr06228	NULL	NULL	NULL	NULL	NULL	NULL	NULL	NULL
Dr06229	NULL	NULL	NULL	IPR001841|IPR013083	Zinc finger, RING-type|Zinc finger, RING/FYVE/PHD-type	GO:0005515|GO:0008270	NULL	NULL
Dr06235	NULL	NULL	NULL	IPR006984|IPR002716	rRNA-processing protein Fcf1/Utp23|PIN domain	GO:0032040	NULL	NULL
Dr06253	NULL	NULL	NULL	IPR004864	Late embryogenesis abundant protein, LEA-14	NULL	NULL	NULL
Dr06290	NULL	NULL	NULL	NULL	NULL	NULL	NULL	NULL
Dr06340	GO:0046872|GO:0006572|GO:0004411|GO:0006559|GO:0055114|GO:0042207	EC:1.13.11.5	homogentisate -dioxygenase	IPR005708|IPR011051|IPR014710	Homogentisate 1,2-dioxygenase|RmlC-like cupin domain|RmlC-like jelly roll fold	GO:0004411|GO:0006559|GO:0006570|GO:0055114	EC:1.13.11.5	KEGG: 00350+1.13.11.5|KEGG: 00643+1.13.11.5|UniPathway: UPA00139
Dr06397	NULL	NULL	NULL	IPR019038	DNA polymerase subunit Cdc27	GO:0005634|GO:0006260	NULL	NULL
Dr06348	NULL	NULL	NULL	IPR006969	Stigma-specific protein Stig1	NULL	NULL	NULL
Dr06349	GO:0008233|GO:0019538|GO:0016023	NULL	aspartic proteinase nepenthesin-2-like	IPR001461|IPR021109|IPR001969	Aspartic peptidase|Aspartic peptidase domain|Aspartic peptidase, active site	GO:0004190|GO:0006508	NULL	NULL
Dr06413	GO:0009536|GO:0006184|GO:0003924|GO:0005525	NULL	dynamin-like protein c-like	IPR022812|IPR001401|IPR001245|IPR027417|IPR011009|IPR002290|IPR000719|IPR008271	Dynamin superfamily|Dynamin, GTPase domain|Serine-threonine/tyrosine-protein kinase catalytic domain|P-loop containing nucleoside triphosphate hydrolase|Protein kinase-like domain|Serine/threonine- / dual specificity protein kinase, catalytic domain|Protein kinase domain|Serine/threonine-protein kinase, active site	GO:0003924|GO:0005525|GO:0004672|GO:0006468|GO:0016772|GO:0005524|GO:0004674	NULL	NULL
Dr06419	NULL	NULL	NULL	NULL	NULL	NULL	NULL	NULL
Dr06408	GO:0048554|GO:0016151|GO:0016023|GO:0031072|GO:0006807|GO:0051082	NULL	urease accessory protein	IPR002639	Urease accessory protein UreF	GO:0006807|GO:0016151	NULL	NULL
Dr06464	GO:0048564|GO:0009535|GO:0005739	NULL	tetratricopeptide repeat-containing protein	IPR011990|IPR019734|IPR013026	Tetratricopeptide-like helical|Tetratricopeptide repeat|Tetratricopeptide repeat-containing domain	GO:0005515	NULL	NULL
Dr06501	GO:0071366|GO:0048364|GO:0016021|GO:0009926|GO:0015416|GO:0006200|GO:0005886|GO:0005524|GO:0015716|GO:0015748	EC:3.6.3.28	pleiotropic drug resistance protein 3-like	IPR003439|IPR013525|IPR013581|IPR027417|IPR003593	ABC transporter-like|ABC-2 type transporter|Plant PDR ABC transporter associated|P-loop containing nucleoside triphosphate hydrolase|AAA+ ATPase domain	GO:0005524|GO:0016887|GO:0016020|GO:0000166|GO:0017111	NULL	NULL
Dr06466	NULL	NULL	NULL	IPR004159	Putative S-adenosyl-L-methionine-dependent methyltransferase	GO:0008168	EC:2.1.1.-	KEGG: 00130+2.1.1.-|KEGG: 00253+2.1.1.-|KEGG: 00270+2.1.1.-|KEGG: 00340+2.1.1.-|KEGG: 00350+2.1.1.-|KEGG: 00360+2.1.1.-|KEGG: 00380+2.1.1.-|KEGG: 00450+2.1.1.-|KEGG: 00522+2.1.1.-|KEGG: 00624+2.1.1.-|KEGG: 00627+2.1.1.-|KEGG: 00860+2.1.1.-|KEGG: 00940+2.1.1.-|KEGG: 00941+2.1.1.-|KEGG: 00942+2.1.1.-|KEGG: 00945+2.1.1.-|KEGG: 00950+2.1.1.-|KEGG: 00981+2.1.1.-
Dr06470	NULL	NULL	NULL	IPR019716|IPR012336	Ribosomal protein L53, mitochondrial|Thioredoxin-like fold	NULL	NULL	NULL
Dr25889	NULL	NULL	NULL	NULL	NULL	NULL	NULL	NULL
Dr20717	GO:0009611|GO:0009631|GO:0004708|GO:0042542|GO:0009414|GO:0009651|GO:0042742|GO:0005737|GO:0004674|GO:0009814|GO:0002237|GO:0005886|GO:0005524|GO:0000187|GO:0009069	EC:2.7.11.0	map kinase kinase	IPR000719|IPR011009|IPR002290|IPR017441|IPR008271	Protein kinase domain|Protein kinase-like domain|Serine/threonine- / dual specificity protein kinase, catalytic domain|Protein kinase, ATP binding site|Serine/threonine-protein kinase, active site	GO:0004672|GO:0005524|GO:0006468|GO:0016772|GO:0004674	NULL	NULL
Dr20788	GO:0008233|GO:0008168|GO:0032259|GO:0006508	EC:2.1.1.0	s-adenosyl-l-methionine-dependent methyltransferase-like protein	IPR025714	Methyltransferase domain	NULL	NULL	NULL
Dr20798	GO:0031957|GO:0004467|GO:0010025|GO:0010143|GO:0001676|GO:0050832|GO:0010311	EC:6.2.1.3	long chain acyl- synthetase 2-like	IPR000873|IPR020845	AMP-dependent synthetase/ligase|AMP-binding, conserved site	GO:0003824|GO:0008152	NULL	NULL
Dr20771	GO:0042218|GO:0006417|GO:0008483|GO:0009735|GO:0016847|GO:0009733|GO:0005737|GO:0030170|GO:0006519	EC:2.6.1.0|EC:4.4.1.14	1-aminocyclopropane-1-carboxylate synthase	IPR004839|IPR015424|IPR015421|IPR015422|IPR004838	Aminotransferase, class I/classII|Pyridoxal phosphate-dependent transferase|Pyridoxal phosphate-dependent transferase, major region, subdomain 1|Pyridoxal phosphate-dependent transferase, major region, subdomain 2|Aminotransferases, class-I, pyridoxal-phosphate-binding site	GO:0009058|GO:0030170|GO:0003824	NULL	Reactome: REACT_13
Dr06527	GO:0009535|GO:0031977|GO:0006979	NULL	chloroplast lipocalin	IPR000566|IPR011038|IPR012674|IPR022272	Lipocalin/cytosolic fatty-acid binding domain|Calycin-like|Calycin|Lipocalin conserved site	NULL	NULL	NULL
Dr06567	GO:0009536	NULL	pentatricopeptide repeat-containing protein	IPR002885|IPR011990	Pentatricopeptide repeat|Tetratricopeptide-like helical	GO:0005515	NULL	NULL
Dr20908	GO:0009579|GO:0009507	NULL	thylakoid lumenal protein	IPR001646	Pentapeptide repeat	NULL	NULL	NULL
Dr06620	GO:0016301	NULL	g-type lectin s-receptor-like serine threonine-protein kinase at5g35370-like	IPR000719|IPR001480|IPR013227|IPR011009|IPR013320|IPR002290|IPR003609|IPR017441|IPR008271	Protein kinase domain|Bulb-type lectin domain|PAN-2 domain|Protein kinase-like domain|Concanavalin A-like lectin/glucanase, subgroup|Serine/threonine- / dual specificity protein kinase, catalytic domain|Apple-like|Protein kinase, ATP binding site|Serine/threonine-protein kinase, active site	GO:0004672|GO:0005524|GO:0006468|GO:0016772|GO:0004674	NULL	NULL
Dr06696	NULL	NULL	NULL	IPR002902	Gnk2-homologous domain	NULL	NULL	NULL
Dr06715	GO:0016023|GO:0005886	NULL	ankyrin repeat-containing protein at2g01680-like	IPR027001|IPR027002|IPR002110|IPR020683|IPR026961	Caskin/Ankyrin repeat-containing protein|Ankyrin repeat-containing protein At2g01680|Ankyrin repeat|Ankyrin repeat-containing domain|PGG domain	GO:0005515	NULL	NULL
Dr06719	GO:0005739	NULL	pentatricopeptide repeat-containing protein	IPR002885	Pentatricopeptide repeat	NULL	NULL	NULL
Dr06775	NULL	NULL	NULL	NULL	NULL	NULL	NULL	NULL
Dr21012	GO:0050896|GO:0006468|GO:0044763|GO:0004674|GO:0005739|GO:0009536|GO:0004713|GO:0005524|GO:0009069	EC:2.7.11.0|EC:2.7.10.0	enhanced disease resistance 1	IPR028324|IPR001245|IPR011009|IPR002290|IPR000719|IPR017441|IPR008271	Serine/threonine-protein kinase CTR1/EDR1|Serine-threonine/tyrosine-protein kinase catalytic domain|Protein kinase-like domain|Serine/threonine- / dual specificity protein kinase, catalytic domain|Protein kinase domain|Protein kinase, ATP binding site|Serine/threonine-protein kinase, active site	GO:0004672|GO:0006468|GO:0016772|GO:0005524|GO:0004674	NULL	NULL
Dr21075	NULL	NULL	NULL	NULL	NULL	NULL	NULL	NULL
Dr21046	NULL	NULL	NULL	IPR011047|IPR011333|IPR027295	Quinonprotein alcohol dehydrogenase-like superfamily|BTB/POZ fold|Quinonprotein alcohol dehydrogenase-like domain	NULL	NULL	NULL
Dr21052	GO:0016568|GO:0004386|GO:0003677|GO:0005524|GO:0016740|GO:0005634|GO:0005739	NULL	chromatin remodelling complex atpase chain isw-	IPR000330|IPR001650|IPR027417|IPR014001|IPR010003	SNF2-related|Helicase, C-terminal|P-loop containing nucleoside triphosphate hydrolase|Helicase, superfamily 1/2, ATP-binding domain|HARP domain	GO:0003677|GO:0005524|GO:0003676|GO:0004386|GO:0005634|GO:0016568	NULL	NULL
Dr21058	GO:0000228|GO:0050794|GO:0006351|GO:0006338	NULL	chromatin structure-remodeling complex protein bsh	IPR006939	SNF5/SMARCB1/INI1	GO:0000228|GO:0006338	NULL	NULL
Dr21059	GO:0009941|GO:0004729|GO:0006782|GO:0015995|GO:0055114	EC:1.3.3.4	protoporphyrinogen oxidase	IPR002937|IPR003311|IPR027418|IPR004572|IPR011525	Amine oxidase|AUX/IAA protein|Protoporphyrinogen oxidase, C-terminal domain|Protoporphyrinogen oxidase|Aux/IAA-ARF-dimerisation	GO:0016491|GO:0055114|GO:0005634|GO:0006355|GO:0004729|GO:0006779|GO:0046983	EC:1.3.3.4	KEGG: 00860+1.3.3.4|MetaCyc: PWY-5531|MetaCyc: PWY-7159|UniPathway: UPA00251
Dr21093	GO:0005488|GO:0034968|GO:0018024|GO:0005634|GO:0006554	EC:2.1.1.43	histone h3 methyltransferase subunit set1	IPR001214|IPR003169	SET domain|GYF	GO:0005515	NULL	NULL
Dr21141	GO:0005739	NULL	thiol-disulfide oxudoreductase dcc	IPR007263	Putative thiol-disulphide oxidoreductase DCC	NULL	NULL	NULL
Dr06786	GO:0010027|GO:0010228|GO:0031969|GO:0005525	NULL	fzo-like protein	IPR001401|IPR027417	Dynamin, GTPase domain|P-loop containing nucleoside triphosphate hydrolase	GO:0003924|GO:0005525	NULL	NULL
Dr06812	GO:0009536	NULL	soss complex subunit b1	IPR012340	Nucleic acid-binding, OB-fold	NULL	NULL	NULL
Dr06804	NULL	NULL	NULL	NULL	NULL	NULL	NULL	NULL
Dr06802	GO:0004553|GO:0009536|GO:0005975	EC:3.2.1.0	isoamylase 2	IPR015902|IPR006047|IPR004193|IPR017853|IPR014756|IPR013783|IPR013780|IPR013781|IPR006589	Glycoside hydrolase, family 13|Glycosyl hydrolase, family 13, catalytic domain|Glycoside hydrolase, family 13, N-terminal|Glycoside hydrolase, superfamily|Immunoglobulin E-set|Immunoglobulin-like fold|Glycosyl hydrolase, family 13, all-beta|Glycoside hydrolase, catalytic domain|Glycosyl hydrolase, family 13, subfamily, catalytic domain	GO:0003824|GO:0005975|GO:0043169|GO:0004553	NULL	NULL
Dr00190	NULL	NULL	NULL	IPR005607	BSD	NULL	NULL	NULL
Dr00220	GO:0004402|GO:0016573|GO:0000123|GO:0042967	EC:2.3.1.48	u5 small nuclear ribonucleoprotein 40 kda	IPR001680|IPR017986|IPR015943|IPR020472|IPR019775	WD40 repeat|G-protein beta WD-40 repeat|WD40-repeat-containing domain|WD40/YVTN repeat-like-containing domain|WD40 repeat, conserved site	GO:0005515	NULL	NULL
Dr00222	NULL	NULL	NULL	NULL	NULL	NULL	NULL	NULL
Dr00260	GO:0005739	NULL	pentatricopeptide repeat-containing protein	IPR002885|IPR011990	Pentatricopeptide repeat|Tetratricopeptide-like helical	GO:0005515	NULL	NULL
Dr21249	GO:0005654|GO:0009414|GO:0015629|GO:0009507|GO:0005576|GO:0000786|GO:0005730|GO:0046982|GO:0003779|GO:0030036|GO:0006096|GO:0045653|GO:0048015|GO:0003677|GO:0034080|GO:0004619|GO:0000723|GO:0009579|GO:0005886|GO:0006094	EC:5.4.2.1	histone h4	IPR007125|IPR009072|IPR001951|IPR019809	Histone core|Histone H4|Histone-fold|Histone H4, conserved site	GO:0003677|GO:0046982|GO:0000786|GO:0005634|GO:0006334	NULL	NULL
Dr21319	GO:0003677|GO:0016023|GO:0003723|GO:0016070	NULL	nucleolar mif4g domain-containing protein 1-like	IPR003891|IPR003890|IPR016024|IPR016021	Initiation factor eIF-4 gamma, MA3|MIF4G-like, type 3|Armadillo-type fold|MIF4-like, type 1/2/3	GO:0003723|GO:0005515|GO:0005488	NULL	NULL
Dr21312	GO:0044424	NULL	small nuclear ribonucleoprotein associated protein b	IPR001163|IPR010920|IPR006649|IPR017131	Ribonucleoprotein LSM domain|Like-Sm (LSM) domain|Ribonucleoprotein LSM domain, eukaryotic/archaea-type|Small ribonucleoprotein associated, SmB/SmN	NULL	NULL	NULL
Dr06923	GO:0010199|GO:0009536	NULL	protein lateral organ boundaries-like	IPR004883	Lateral organ boundaries, LOB	NULL	NULL	NULL
Dr06998	GO:0003723|GO:0042255|GO:0005634	NULL	protein	IPR005155|IPR015947|IPR002478|IPR016686	Ribosome biogenesis factor NIP7-like|PUA-like domain|Pseudouridine synthase/archaeosine transglycosylase|Ribosome biogenesis factor, NIP7	GO:0003723|GO:0005634|GO:0042255	NULL	NULL
Dr07001	NULL	NULL	NULL	IPR000008	C2 domain	GO:0005515	NULL	NULL
Dr06906	GO:0004715|GO:0016023|GO:0005886|GO:0006468|GO:0005524|GO:0016021|GO:0004674|GO:0009069	EC:2.7.10.2|EC:2.7.11.0	nsp-interacting kinase 3	IPR000719|IPR013210|IPR011009|IPR013320|IPR002290|IPR001611|IPR017441|IPR008271	Protein kinase domain|Leucine-rich repeat-containing N-terminal, type 2|Protein kinase-like domain|Concanavalin A-like lectin/glucanase, subgroup|Serine/threonine- / dual specificity protein kinase, catalytic domain|Leucine-rich repeat|Protein kinase, ATP binding site|Serine/threonine-protein kinase, active site	GO:0004672|GO:0005524|GO:0006468|GO:0016772|GO:0005515|GO:0004674	NULL	NULL
Dr06914	GO:0016020|GO:0008375|GO:0005739	NULL	bc10 protein	IPR003406	Glycosyl transferase, family 14	GO:0008375|GO:0016020	NULL	NULL
Dr06921	GO:0008168|GO:0032259	EC:2.1.1.0	set1 complex component swd2	IPR001680|IPR017986|IPR015943|IPR020472|IPR019775	WD40 repeat|G-protein beta WD-40 repeat|WD40-repeat-containing domain|WD40/YVTN repeat-like-containing domain|WD40 repeat, conserved site	GO:0005515	NULL	NULL
Dr06933	NULL	NULL	NULL	IPR001680|IPR017986|IPR015943|IPR020472|IPR019775	WD40 repeat|G-protein beta WD-40 repeat|WD40-repeat-containing domain|WD40/YVTN repeat-like-containing domain|WD40 repeat, conserved site	GO:0005515	NULL	NULL
Dr07015	GO:0006098|GO:0046872|GO:0042732|GO:0009045|GO:0016023|GO:0005773|GO:0005783|GO:0005886|GO:0006000|GO:0006013	EC:5.3.1.5	xylose isomerase	IPR013022|IPR001998|IPR013452	Xylose isomerase-like, TIM barrel domain|Xylose isomerase|Xylose isomerase, bacterial-type	GO:0005975|GO:0009045	EC:5.3.1.5	KEGG: 00040+5.3.1.5|KEGG: 00051+5.3.1.5
Dr07046	GO:0005739	NULL	pentatricopeptide repeat-containing protein	IPR002885|IPR011990	Pentatricopeptide repeat|Tetratricopeptide-like helical	GO:0005515	NULL	NULL
Dr07073	GO:0005829|GO:0050242|GO:0008610|GO:0006090|GO:0009416|GO:0046872|GO:0005524|GO:0019252|GO:0016310|GO:0016301|GO:0009570|GO:0015979|GO:0005634|GO:0015976	EC:2.7.9.1	phosphate dikinase 1	IPR010121|IPR008279|IPR002192|IPR000121|IPR015813|IPR013815|IPR013816|IPR018274|IPR023151	Pyruvate, phosphate dikinase|PEP-utilising enzyme, mobile domain|Pyruvate phosphate dikinase, PEP/pyruvate-binding|PEP-utilising enzyme, C-terminal|Pyruvate/Phosphoenolpyruvate kinase-like domain|ATP-grasp fold, subdomain 1|ATP-grasp fold, subdomain 2|PEP-utilising enzyme, active site|PEP-utilising enzyme, conserved site	GO:0006090|GO:0050242|GO:0016310|GO:0016772|GO:0005524|GO:0016301|GO:0003824	EC:2.7.9.1	KEGG: 00620+2.7.9.1|KEGG: 00710+2.7.9.1|MetaCyc: PWY-241|MetaCyc: PWY-6549|MetaCyc: PWY-7115|MetaCyc: PWY-7117
Dr21346	NULL	NULL	NULL	NULL	NULL	NULL	NULL	NULL
Dr21506	GO:0005739	NULL	pentatricopeptide repeat-containing protein	IPR002885|IPR011990	Pentatricopeptide repeat|Tetratricopeptide-like helical	GO:0005515	NULL	NULL
Dr21507	GO:0043231|GO:0044444	NULL	galactosyltransferase family protein	IPR002659	Glycosyl transferase, family 31	GO:0006486|GO:0008378|GO:0016020	NULL	UniPathway: UPA00378
Dr21508	GO:0000166	NULL	probable mitochondrial chaperone bcs1-b-like	IPR003959|IPR025753|IPR027417|IPR003593	ATPase, AAA-type, core|AAA-type ATPase, N-terminal domain|P-loop containing nucleoside triphosphate hydrolase|AAA+ ATPase domain	GO:0005524|GO:0000166|GO:0017111	NULL	NULL
Dr21509	NULL	NULL	NULL	IPR008480	Protein of unknown function DUF761, plant	NULL	NULL	NULL
Dr07095	GO:0016787	NULL	isoaspartyl peptidase l-asparaginase 4 subunit beta	IPR000246|IPR025558|IPR025836	Peptidase T2, asparaginase 2|Domain of unknown function DUF4283|Zinc knuckle CX2CX4HX4C	GO:0016787	NULL	NULL
Dr26019	GO:0050896	NULL	saur family protein	IPR003676	Auxin-induced protein, ARG7	NULL	NULL	NULL
Dr21651	GO:0016020	NULL	protein	IPR006634	TRAM/LAG1/CLN8 homology domain	GO:0016021	NULL	NULL
Dr21682	GO:0004527|GO:1901363|GO:0008152|GO:0097159|GO:0009536	NULL	small rna degrading nuclease 5-like	IPR020946|IPR013520|IPR020905|IPR012337|IPR017850|IPR017849|IPR013027|IPR000103|IPR006055	Flavin monooxygenase-like|Exonuclease, RNase T/DNA polymerase III|NAD(P)H-quinone oxidoreductase subunit O|FAD-dependent pyridine nucleotide-disulphide oxidoreductase|Pyridine nucleotide-disulphide oxidoreductase, class-II|Ribonuclease H-like domain|Alkaline-phosphatase-like, core domain|Alkaline phosphatase-like, alpha/beta/alpha|Exonuclease	GO:0004499|GO:0050660|GO:0050661|GO:0055114|GO:0005886|GO:0016655|GO:0003676|GO:0003824|GO:0008152|GO:0016491|GO:0004527	EC:1.6.5.-	KEGG: 00624+1.6.5.-
Dr21691	NULL	NULL	NULL	IPR002014|IPR004152|IPR008942|IPR018205	VHS|GAT|ENTH/VHS|VHS subgroup	GO:0006886|GO:0005622	NULL	NULL
Dr21693	GO:0009536	NULL	pentatricopeptide repeat-containing protein	IPR002885|IPR011990	Pentatricopeptide repeat|Tetratricopeptide-like helical	GO:0005515	NULL	NULL
Dr21644	GO:0009536	NULL	rubisco methyltransferase family protein	IPR015353	Rubisco LS methyltransferase, substrate-binding domain	NULL	NULL	NULL
Dr07185	GO:0016787	NULL	pectin methylesterase	IPR000070|IPR006501|IPR011050|IPR012334|IPR018040	Pectinesterase, catalytic|Pectinesterase inhibitor domain|Pectin lyase fold/virulence factor|Pectin lyase fold|Pectinesterase, active site	GO:0005618|GO:0030599|GO:0042545|GO:0004857	EC:3.1.1.11	KEGG: 00040+3.1.1.11|KEGG: 00500+3.1.1.11|MetaCyc: PWY-1081|MetaCyc: PWY-7243|MetaCyc: PWY-7246|MetaCyc: PWY-7248|UniPathway: UPA00545
Dr07198	GO:0003964|GO:0006278|GO:0003723|GO:0009536|GO:0005739	EC:2.7.7.49	pentatricopeptide repeat-containing protein	IPR002885|IPR011990	Pentatricopeptide repeat|Tetratricopeptide-like helical	GO:0005515	NULL	NULL
Dr07246	GO:0005739|GO:0006950	NULL	chaperone protein dnaj 10-like	IPR001623|IPR026894|IPR018253	DnaJ domain|DNAJ-containing protein, X-domain|DnaJ domain, conserved site	NULL	NULL	NULL
Dr21721	GO:0005739	NULL	thioredoxin-related protein	IPR001841|IPR013083	Zinc finger, RING-type|Zinc finger, RING/FYVE/PHD-type	GO:0005515|GO:0008270	NULL	NULL
Dr21719	NULL	NULL	NULL	NULL	NULL	NULL	NULL	NULL
Dr07288	GO:0005739|GO:0003887|GO:0006261|GO:0003677|GO:0008622	EC:2.7.7.7	dna polymerase epsilon subunit 2-like	IPR007185|IPR024639|IPR016266	DNA polymerase alpha/epsilon, subunit B|DNA polymerase epsilon subunit B, N-terminal|DNA polymerase epsilon, subunit B	GO:0003677|GO:0003887|GO:0006260|GO:0005634|GO:0006261	EC:2.7.7.7	Reactome: REACT_152|Reactome: REACT_22172|Reactome: REACT_383|KEGG: 00230+2.7.7.7|KEGG: 00240+2.7.7.7
Dr07322	GO:0009536	NULL	pentatricopeptide repeat-containing protein	IPR002885|IPR011990	Pentatricopeptide repeat|Tetratricopeptide-like helical	GO:0005515	NULL	NULL
Dr07349	GO:0016020	NULL	aluminum-activated malate transporter 9-like	IPR020966	Aluminum-activated malate transporter	GO:0015743	NULL	NULL
Dr07279	NULL	NULL	NULL	IPR007541	Uncharacterised protein family, basic secretory protein	NULL	NULL	NULL
Dr07339	NULL	NULL	NULL	IPR000408|IPR009091	Regulator of chromosome condensation, RCC1|Regulator of chromosome condensation 1/beta-lactamase-inhibitor protein II	NULL	NULL	NULL
Dr07350	NULL	NULL	NULL	IPR001461|IPR021109|IPR001969	Aspartic peptidase|Aspartic peptidase domain|Aspartic peptidase, active site	GO:0004190|GO:0006508	NULL	NULL
Dr21898	NULL	NULL	NULL	NULL	NULL	NULL	NULL	NULL
Dr26060	GO:1901137|GO:0034645|GO:0070085|GO:0008417|GO:0016023|GO:0016020|GO:0005794	NULL	alpha-( )-fucosyltransferase	IPR001503	Glycosyl transferase, family 10	GO:0006486|GO:0008417|GO:0016020	NULL	UniPathway: UPA00378
Dr21963	GO:0009536	NULL	pentatricopeptide repeat-containing protein	IPR002885|IPR011990	Pentatricopeptide repeat|Tetratricopeptide-like helical	GO:0005515	NULL	NULL
Dr21955	GO:0016311|GO:0016791|GO:0005739	EC:3.1.3.0	5 deoxy cytosolic type c protein domain containing protein	IPR010708|IPR023214	5'(3')-deoxyribonucleotidase|HAD-like domain	GO:0016791	EC:3.1.3.-	KEGG: 00051+3.1.3.-|KEGG: 00053+3.1.3.-|KEGG: 00565+3.1.3.-|KEGG: 00600+3.1.3.-|KEGG: 00730+3.1.3.-|KEGG: 00740+3.1.3.-|KEGG: 00760+3.1.3.-|Reactome: REACT_1698
Dr21995	GO:0009987|GO:0009536	NULL	protein	IPR007434|IPR016181|IPR016040	Protein of unknown function DUF482|Acyl-CoA N-acyltransferase|NAD(P)-binding domain	NULL	NULL	NULL
Dr07415	GO:0016023|GO:0016310|GO:0004672|GO:0016020|GO:0000166	NULL	serine threonine-protein kinase bri1-like 1	IPR000719|IPR001611|IPR013210|IPR025875|IPR011009|IPR013320|IPR002290|IPR003591|IPR017441|IPR008271	Protein kinase domain|Leucine-rich repeat|Leucine-rich repeat-containing N-terminal, type 2|Leucine rich repeat 4|Protein kinase-like domain|Concanavalin A-like lectin/glucanase, subgroup|Serine/threonine- / dual specificity protein kinase, catalytic domain|Leucine-rich repeat, typical subtype|Protein kinase, ATP binding site|Serine/threonine-protein kinase, active site	GO:0004672|GO:0005524|GO:0006468|GO:0005515|GO:0016772|GO:0004674	NULL	NULL
Dr07453	GO:0044434	NULL	uncharacterized protein chloroplastic-like	NULL	NULL	NULL	NULL	NULL
Dr07430	GO:0010267	NULL	tho complex subunit 3-like	IPR001680|IPR017986|IPR015943|IPR020472|IPR019775	WD40 repeat|G-protein beta WD-40 repeat|WD40-repeat-containing domain|WD40/YVTN repeat-like-containing domain|WD40 repeat, conserved site	GO:0005515	NULL	NULL
Dr07487	GO:0007178|GO:0016023|GO:0010227|GO:0009793|GO:0004675|GO:0016021|GO:0010152|GO:0007030|GO:0006468|GO:0009556|GO:0043234|GO:0009742|GO:0005886|GO:0005524|GO:0009069	NULL	somatic embryogenesis receptor kinase	IPR000719|IPR001611|IPR013210|IPR011009|IPR013320|IPR002290|IPR003591|IPR017441|IPR008271	Protein kinase domain|Leucine-rich repeat|Leucine-rich repeat-containing N-terminal, type 2|Protein kinase-like domain|Concanavalin A-like lectin/glucanase, subgroup|Serine/threonine- / dual specificity protein kinase, catalytic domain|Leucine-rich repeat, typical subtype|Protein kinase, ATP binding site|Serine/threonine-protein kinase, active site	GO:0004672|GO:0005524|GO:0006468|GO:0005515|GO:0016772|GO:0004674	NULL	NULL
Dr07497	NULL	NULL	NULL	IPR005333|IPR017887	Transcription factor, TCP|Transcription factor TCP subgroup	NULL	NULL	NULL
Dr07566	NULL	NULL	NULL	IPR005202	Transcription factor GRAS	NULL	NULL	NULL
Dr07545	GO:0006944|GO:0009505|GO:0005484|GO:0005794|GO:0016023|GO:0005886|GO:0016021|GO:0006810	NULL	phagocytic receptor 1b-like	IPR004240|IPR016196	Nonaspanin (TM9SF)|Major facilitator superfamily domain, general substrate transporter	GO:0016021	NULL	NULL
Dr07564	NULL	NULL	NULL	NULL	NULL	NULL	NULL	NULL
Dr07569	GO:0050896|GO:0044763|GO:0016020	NULL	g protein-coupled receptor	IPR022340|IPR022343	G protein-coupled receptor GCR1 putative|GCR1-cAMP receptor	NULL	NULL	NULL
Dr07595	NULL	NULL	NULL	IPR001810|IPR011043	F-box domain|Galactose oxidase/kelch, beta-propeller	GO:0005515	NULL	NULL
Dr07515	NULL	NULL	NULL	IPR002885|IPR011990	Pentatricopeptide repeat|Tetratricopeptide-like helical	GO:0005515	NULL	NULL
Dr07524	GO:0016020|GO:0044699	NULL	quinolone resistance protein nora	IPR011701|IPR016196|IPR020846	Major facilitator superfamily|Major facilitator superfamily domain, general substrate transporter|Major facilitator superfamily domain	GO:0016021|GO:0055085	NULL	NULL
Dr22049	NULL	NULL	NULL	IPR021129|IPR013761|IPR001660	Sterile alpha motif, type 1|Sterile alpha motif/pointed domain|Sterile alpha motif domain	GO:0005515	NULL	NULL
Dr22037	NULL	NULL	NULL	IPR019380	Casein kinase substrate, phosphoprotein PP28	NULL	NULL	NULL
Dr22045	GO:0009055|GO:0045454|GO:0006662|GO:0047134|GO:0009295|GO:0009657|GO:0009507|GO:0009579|GO:0015035|GO:0022900|GO:0006118	EC:1.8.1.8	thioredoxin-like protein chloroplastic-like	IPR013766|IPR012336	Thioredoxin domain|Thioredoxin-like fold	GO:0045454	NULL	NULL
Dr22048	GO:0003677|GO:0009536	NULL	hmg protein	IPR009071	High mobility group box domain	NULL	NULL	NULL
Dr07626	GO:0046983|GO:0005739	NULL	transcription factor	NULL	NULL	NULL	NULL	NULL
Dr07631	GO:0003743|GO:0016070|GO:0016020|GO:0005739|GO:0005840|GO:0006446	NULL	basic leucine zipper and w2 domain-containing protein 2-like	IPR003307|IPR016024|IPR016021	W2 domain|Armadillo-type fold|MIF4-like, type 1/2/3	GO:0005515|GO:0005488	NULL	NULL
Dr07676	NULL	NULL	NULL	IPR002885|IPR011990	Pentatricopeptide repeat|Tetratricopeptide-like helical	GO:0005515	NULL	NULL
Dr22108	GO:0006810|GO:0044763|GO:0044444|GO:0016020	NULL	syntaxin-related protein knolle	IPR006011|IPR000727|IPR010989|IPR006012	Syntaxin, N-terminal domain|Target SNARE coiled-coil domain|t-SNARE|Syntaxin/epimorphin, conserved site	GO:0016020|GO:0005515|GO:0016192|GO:0005484|GO:0006886	NULL	Reactome: REACT_11184
Dr22097	GO:0009507	NULL	protein	IPR021659	Protein of unknown function DUF3252	NULL	NULL	NULL
Dr07765	GO:0016023|GO:0016020	NULL	thaumatin-like protein	IPR001938	Thaumatin	NULL	NULL	NULL
Dr07760	GO:0009536|GO:0008233	NULL	aspartic proteinase nepenthesin-1-like	IPR001461|IPR021109|IPR001969	Aspartic peptidase|Aspartic peptidase domain|Aspartic peptidase, active site	GO:0004190|GO:0006508	NULL	NULL
Dr07763	GO:0005737|GO:0008380|GO:0008026|GO:0003723|GO:0006397|GO:0005524|GO:0005634	NULL	dead-box atp-dependent rna helicase	IPR011545|IPR001650|IPR027417|IPR014001|IPR014014|IPR000629	DNA/RNA helicase, DEAD/DEAH box type, N-terminal|Helicase, C-terminal|P-loop containing nucleoside triphosphate hydrolase|Helicase, superfamily 1/2, ATP-binding domain|RNA helicase, DEAD-box type, Q motif|RNA helicase, ATP-dependent, DEAD-box, conserved site	GO:0003676|GO:0005524|GO:0008026|GO:0004386	NULL	NULL
Dr07783	GO:0009536	NULL	uncharacterized protein	IPR021825	Protein of unknown function DUF3411, plant	NULL	NULL	NULL
Dr07856	GO:0004856|GO:0005829|GO:0005997|GO:0016310	EC:2.7.1.17	xylulose kinase	IPR018484	Carbohydrate kinase, FGGY, N-terminal	GO:0005975|GO:0016773	NULL	NULL
Dr07862	GO:0006534|GO:0030170|GO:0016226|GO:0031071|GO:0005524|GO:0008270|GO:0005739	EC:2.8.1.7	cysteine desulfurase	IPR000192|IPR015424|IPR015421|IPR015422|IPR016454	Aminotransferase, class V/Cysteine desulfurase|Pyridoxal phosphate-dependent transferase|Pyridoxal phosphate-dependent transferase, major region, subdomain 1|Pyridoxal phosphate-dependent transferase, major region, subdomain 2|Cysteine desulfurase, NifS	GO:0008152|GO:0003824|GO:0030170	EC:2.8.1.7	KEGG: 00730+2.8.1.7|MetaCyc: PWY-6823|MetaCyc: PWY-6891|MetaCyc: PWY-6892|MetaCyc: PWY-7250
Dr07879	GO:0005739	NULL	thymocyte nuclear protein 1-like	IPR002740|IPR015947	EVE domain|PUA-like domain	NULL	NULL	NULL
Dr07884	GO:0005737|GO:0044262|GO:0005886|GO:0004459|GO:0009737|GO:0006096|GO:0009651|GO:0055114|GO:0000166|GO:0006094|GO:0006534	EC:1.1.1.27	l-lactate dehydrogenase	IPR001557|IPR001236|IPR022383|IPR015955|IPR016040|IPR011304|IPR018177	L-lactate/malate dehydrogenase|Lactate/malate dehydrogenase, N-terminal|Lactate/malate dehydrogenase, C-terminal|Lactate dehydrogenase/glycoside hydrolase, family 4, C-terminal|NAD(P)-binding domain|L-lactate dehydrogenase|L-lactate dehydrogenase, active site	GO:0016616|GO:0044262|GO:0055114|GO:0016491|GO:0003824|GO:0005975|GO:0004459|GO:0005737|GO:0006096	EC:1.1.1.27	KEGG: 00010+1.1.1.27|KEGG: 00270+1.1.1.27|KEGG: 00620+1.1.1.27|KEGG: 00640+1.1.1.27|MetaCyc: PWY-5481|MetaCyc: PWY-6901|UniPathway: UPA00554
Dr07900	NULL	NULL	NULL	NULL	NULL	NULL	NULL	NULL
Dr07887	GO:0016020	NULL	mate efflux family protein	IPR002528	Multi antimicrobial extrusion protein	GO:0006855|GO:0015238|GO:0015297|GO:0016020|GO:0055085	NULL	Reactome: REACT_15518|Reactome: REACT_20633
Dr07896	GO:0005739	NULL	lyr family of fe s cluster biogenesis protein	IPR008011	Complex 1 LYR protein	NULL	NULL	NULL
Dr22342	NULL	NULL	NULL	NULL	NULL	NULL	NULL	NULL
Dr22341	GO:0016023	NULL	pan domain-containing protein	IPR000858|IPR001480|IPR013227|IPR003609	S-locus glycoprotein|Bulb-type lectin domain|PAN-2 domain|Apple-like	GO:0048544	NULL	NULL
Dr08014	GO:0005739	NULL	pentatricopeptide repeat-containing protein	IPR002885	Pentatricopeptide repeat	NULL	NULL	NULL
Dr07988	GO:0009507	NULL	pentatricopeptide repeat-containing protein	IPR002885|IPR011990|IPR002625	Pentatricopeptide repeat|Tetratricopeptide-like helical|Smr protein/MutS2 C-terminal	GO:0005515	NULL	NULL
Dr07998	GO:0009536	NULL	pentatricopeptide repeat-containing protein mitochondrial-like	IPR002885|IPR011990	Pentatricopeptide repeat|Tetratricopeptide-like helical	GO:0005515	NULL	NULL
Dr08008	NULL	NULL	NULL	IPR004140|IPR016159	Exocyst complex protein Exo70|Cullin repeat-like-containing domain	GO:0000145|GO:0006887	NULL	NULL
Dr07915	GO:0016787	NULL	feruloyl esterase a	IPR002921	Lipase, class 3	GO:0004806|GO:0006629	NULL	Reactome: REACT_14797|Reactome: REACT_604
Dr07911	GO:0016787|GO:0044464	NULL	aspartyl protease	IPR001461|IPR021109	Aspartic peptidase|Aspartic peptidase domain	GO:0004190|GO:0006508	NULL	NULL
Dr22430	GO:0003676|GO:0000166	NULL	pre-mrna branch site p14-like protein	IPR000504|IPR012677	RNA recognition motif domain|Nucleotide-binding, alpha-beta plait	GO:0003676|GO:0000166	NULL	NULL
Dr08039	GO:0009505|GO:0004557|GO:0046477|GO:0009311|GO:0005739|GO:0016139|GO:0001575|GO:0006012|GO:0046486	EC:3.2.1.22	alpha-galactosidase alpha-n-	IPR017853|IPR013785	Glycoside hydrolase, superfamily|Aldolase-type TIM barrel	GO:0003824	NULL	NULL
Dr08070	NULL	NULL	NULL	IPR001623|IPR015399|IPR018253	DnaJ domain|Domain of unknown function DUF1977, DnaJ-like|DnaJ domain, conserved site	NULL	NULL	NULL
Dr00352	NULL	NULL	NULL	NULL	NULL	NULL	NULL	NULL
Dr00354	GO:0005886|GO:0055085|GO:0008643|GO:0032440|GO:0016021|GO:0005358|GO:0055114|GO:0006812	EC:1.3.1.74	hexose transporter	IPR005828|IPR016196|IPR003663|IPR020846|IPR005829	General substrate transporter|Sugar/inositol transporter|Major facilitator superfamily domain, general substrate transporter|Major facilitator superfamily domain|Sugar transporter, conserved site	GO:0016021|GO:0022857|GO:0055085|GO:0016020|GO:0022891|GO:0005215|GO:0006810	NULL	Reactome: REACT_15518
Dr00384	NULL	NULL	NULL	IPR001214	SET domain	GO:0005515	NULL	NULL
Dr00386	NULL	NULL	NULL	NULL	NULL	NULL	NULL	NULL
Dr00377	GO:0005739|GO:0005886	NULL	protein	NULL	NULL	NULL	NULL	NULL
Dr00409	GO:0005739|GO:0006426|GO:0005524|GO:0046686|GO:0004820|GO:0006544|GO:0006563|GO:0006566|GO:0009345	EC:6.1.1.14	glycyl-trna synthetase	IPR027031|IPR017941|IPR002314|IPR004192|IPR004154|IPR009068|IPR002315|IPR006317|IPR006195|IPR000738	Glycyl-tRNA synthetase/DNA polymerase subunit gamma-2|Rieske [2Fe-2S] iron-sulphur domain|Aminoacyl-tRNA synthetase, class II (G/ H/ P/ S), conserved domain|Ubiquinol cytochrome reductase, transmembrane domain|Anticodon-binding|Glycyl-tRNA synthetase, alpha2 dimer|S15/NS1, RNA-binding|Ubiquinol-cytochrome c reductase, iron-sulphur subunit|Aminoacyl-tRNA synthetase, class II|WHEP-TRS	GO:0016491|GO:0051537|GO:0055114|GO:0000166|GO:0004812|GO:0005524|GO:0006418|GO:0008121|GO:0004820|GO:0005737|GO:0006426	EC:6.1.1.14|EC:1.10.2.2	KEGG: 00970+6.1.1.14|Reactome: REACT_71|KEGG: 00190+1.10.2.2|MetaCyc: PWY-3781|MetaCyc: PWY-6692|MetaCyc: PWY-7082|MetaCyc: PWY-7279
Dr00308	NULL	NULL	NULL	IPR002885|IPR011990	Pentatricopeptide repeat|Tetratricopeptide-like helical	GO:0005515	NULL	NULL
Dr00458	GO:0016020|GO:0009507	NULL	probable plastid-lipid-associated protein chloroplastic-like	IPR006843	Plastid lipid-associated protein/fibrillin conserved domain	GO:0005198|GO:0009507	NULL	NULL
Dr00463	GO:0003887|GO:0006260|GO:0003677|GO:0005634|GO:0042575	EC:2.7.7.7	dna polymerase delta small subunit	IPR024826|IPR007185	DNA polymerase delta/II small subunit family|DNA polymerase alpha/epsilon, subunit B	GO:0003677|GO:0003887|GO:0006260	EC:2.7.7.7	KEGG: 00230+2.7.7.7|KEGG: 00240+2.7.7.7|Reactome: REACT_152|Reactome: REACT_22172|Reactome: REACT_383
Dr00472	NULL	NULL	NULL	IPR027074|IPR022712	Integrator complex subunit 9|Beta-Casp domain	GO:0016180|GO:0032039	NULL	NULL
Dr00478	GO:0008137|GO:0005747|GO:0009536|GO:0006120|GO:0006744|GO:0006814|GO:0015992	EC:1.6.5.3	nadh dehydrogenase	IPR008698	NADH:ubiquinone oxidoreductase, B18 subunit	GO:0003954|GO:0005739|GO:0008137	NULL	NULL
Dr00481	NULL	NULL	NULL	IPR002885	Pentatricopeptide repeat	NULL	NULL	NULL
Dr00483	GO:0016020|GO:0005524|GO:0004386|GO:0003677|GO:0016740	NULL	snf2 family dna-dependent atpase	IPR000330|IPR001650|IPR027417|IPR014001	SNF2-related|Helicase, C-terminal|P-loop containing nucleoside triphosphate hydrolase|Helicase, superfamily 1/2, ATP-binding domain	GO:0003677|GO:0005524|GO:0003676|GO:0004386	NULL	NULL
Dr00490	NULL	NULL	NULL	IPR013180|IPR016024|IPR011989	Beta-catenin-like protein 1, N-terminal|Armadillo-type fold|Armadillo-like helical	GO:0005488	NULL	NULL
Dr00491	GO:0016020	NULL	uncharacterized protein	IPR019049	Nucleoporin protein Ndc1-Nup	NULL	NULL	NULL
Dr00509	GO:0016301	NULL	protein	IPR000719|IPR011009|IPR017441	Protein kinase domain|Protein kinase-like domain|Protein kinase, ATP binding site	GO:0004672|GO:0005524|GO:0006468|GO:0016772	NULL	NULL
Dr00523	NULL	NULL	NULL	IPR010605	Protein of unknown function DUF1191	NULL	NULL	NULL
Dr00531	GO:0003700|GO:0043565|GO:0010089|GO:0006355|GO:0005667|GO:0045449	NULL	homeobox protein knotted-1-like protein	IPR005539|IPR005540|IPR005541|IPR008422|IPR009057|IPR001356	ELK|KNOX1|KNOX2|Homeobox KN domain|Homeodomain-like|Homeobox domain	GO:0003677|GO:0005634|GO:0006355|GO:0003700|GO:0043565	NULL	NULL
Dr00565	GO:0009536	NULL	protein	IPR002634|IPR003808	BolA protein|Fe-S metabolism associated domain, SufE-like	NULL	NULL	UniPathway: UPA00266
Dr08098	GO:0004190|GO:0006508	EC:3.4.23.0	aspartyl protease family protein	IPR001461|IPR021109|IPR001969	Aspartic peptidase|Aspartic peptidase domain|Aspartic peptidase, active site	GO:0004190|GO:0006508	NULL	NULL
Dr08106	GO:0071704|GO:0009628|GO:0006950|GO:0044238|GO:0044424	NULL	dna-damage-repair toleration protein drt102	IPR003500|IPR013096|IPR011051|IPR014710|IPR012100	Sugar-phosphate isomerase, RpiB/LacA/LacB family|Cupin 2, conserved barrel|RmlC-like cupin domain|RmlC-like jelly roll fold|DNA-damage-repair/toleration protein, DRT102	GO:0005975|GO:0016853	EC:5.3.1.26	KEGG: 00052+5.3.1.26|UniPathway: UPA00702
Dr08176	NULL	NULL	NULL	IPR004873	BURP domain	NULL	NULL	NULL
Dr08181	GO:0005739|GO:0018342|GO:0044699|GO:0009737|GO:0050794|GO:0004659	NULL	farnesyltransferase beta subunit	IPR026872|IPR001330|IPR008930	Protein farnesyltransferase subunit beta|Prenyltransferase/squalene oxidase|Terpenoid cyclases/protein prenyltransferase alpha-alpha toroid	GO:0005965|GO:0018343|GO:0042127|GO:0003824	EC:2.5.1.58	KEGG: 00900+2.5.1.58
Dr08116	GO:0003779|GO:0030036	NULL	profilin family protein	IPR005455	Profilin	GO:0003779|GO:0030036	NULL	NULL
Dr08138	GO:0003899|GO:0006351|GO:0003677|GO:0032549|GO:0008270|GO:0005730|GO:0006144|GO:0006206	EC:2.7.7.6	dna-directed rna polymerase iii subunit rpc1-like	IPR015700|IPR007066|IPR007081|IPR007083	DNA-directed RNA polymerase III largest subunit|RNA polymerase Rpb1, domain 3|RNA polymerase Rpb1, domain 5|RNA polymerase Rpb1, domain 4	GO:0003899|GO:0005634|GO:0006351|GO:0008270|GO:0032549|GO:0003677	EC:2.7.7.6	KEGG: 00230+2.7.7.6|KEGG: 00240+2.7.7.6|KEGG: 00230+2.7.7.6|KEGG: 00240+2.7.7.6|Reactome: REACT_1788
Dr08152	NULL	NULL	NULL	IPR003822|IPR013194	Paired amphipathic helix|Histone deacetylase interacting	GO:0005634|GO:0006355	NULL	Reactome: REACT_22258
Dr22659	GO:0016020|GO:0006886|GO:0005801	NULL	sec34-like protein	IPR007265|IPR016159	Conserved oligomeric Golgi complex, subunit 3|Cullin repeat-like-containing domain	GO:0005801|GO:0006886|GO:0016020	NULL	NULL
Dr22654	NULL	NULL	NULL	IPR001841|IPR013083	Zinc finger, RING-type|Zinc finger, RING/FYVE/PHD-type	GO:0005515|GO:0008270	NULL	NULL
Dr08218	GO:0009825|GO:0005885|GO:0010090|GO:0034314|GO:0005524|GO:0003779|GO:0005737	NULL	actin related protein 2	IPR004000|IPR027306	Actin-related protein|Actin-related protein 2 (Arp2)	GO:0005524|GO:0005856|GO:0005885|GO:0030833|GO:0034314	NULL	NULL
Dr08258	NULL	NULL	NULL	IPR011510|IPR013761|IPR001660	Sterile alpha motif, type 2|Sterile alpha motif/pointed domain|Sterile alpha motif domain	GO:0005515	NULL	NULL
Dr08291	NULL	NULL	NULL	NULL	NULL	NULL	NULL	NULL
Dr08299	NULL	NULL	NULL	IPR008480	Protein of unknown function DUF761, plant	NULL	NULL	NULL
Dr08303	GO:0051766|GO:0009856|GO:0006796|GO:0044464|GO:0044707	NULL	inositol polyphosphate multikinase alpha	IPR005522	Inositol polyphosphate kinase	GO:0008440	NULL	NULL
Dr08304	GO:0046872|GO:0016023|GO:0016787|GO:0005576|GO:0008152	NULL	germin-like protein	IPR006045|IPR011051|IPR014710|IPR001929|IPR019780	Cupin 1|Germin|RmlC-like cupin domain|RmlC-like jelly roll fold|Germin, manganese binding site	GO:0045735|GO:0030145	NULL	NULL
Dr08305	NULL	NULL	NULL	NULL	NULL	NULL	NULL	NULL
Dr08267	GO:0008398|GO:0005886|GO:0009055|GO:0005506|GO:0020037|GO:0032259|GO:0016021|GO:0008168|GO:0005783|GO:0016126|GO:0022900|GO:0006118	EC:1.14.13.70|EC:2.1.1.0	obtusifoliol 14alpha-demethylase	IPR001128|IPR002403|IPR017972	Cytochrome P450|Cytochrome P450, E-class, group IV|Cytochrome P450, conserved site	GO:0005506|GO:0016705|GO:0020037|GO:0055114|GO:0004497	NULL	Reactome: REACT_13433
Dr08269	GO:0016020|GO:0005739	NULL	pentatricopeptide repeat-containing protein mitochondrial-like	IPR002885|IPR011990	Pentatricopeptide repeat|Tetratricopeptide-like helical	GO:0005515	NULL	NULL
Dr08271	NULL	NULL	NULL	IPR026570	Coiled-coil domain-containing protein 86	NULL	NULL	NULL
Dr08447	NULL	NULL	NULL	NULL	NULL	NULL	NULL	NULL
Dr08460	NULL	NULL	NULL	IPR016140	Bifunctional inhibitor/plant lipid transfer protein/seed storage helical domain	NULL	NULL	NULL
Dr08450	NULL	NULL	NULL	IPR000182|IPR016181	GNAT domain|Acyl-CoA N-acyltransferase	GO:0008080	NULL	NULL
Dr08437	GO:0050897|GO:0006552|GO:0005524|GO:0004075|GO:0005759|GO:0004485|GO:0022626|GO:0006633|GO:0009343|GO:0006550|GO:0006574	EC:6.3.4.14|EC:6.4.1.4	methylcrotonoyl- carboxylase subunit alpha	IPR005481|IPR000089|IPR005482|IPR005479|IPR011053|IPR011054|IPR016185|IPR013815|IPR013816|IPR011761|IPR011764|IPR001882	Carbamoyl-phosphate synthase, large subunit, N-terminal|Biotin/lipoyl attachment|Biotin carboxylase, C-terminal|Carbamoyl-phosphate synthetase large subunit-like, ATP-binding domain|Single hybrid motif|Rudiment single hybrid motif|Pre-ATP-grasp domain|ATP-grasp fold, subdomain 1|ATP-grasp fold, subdomain 2|ATP-grasp fold|Biotin carboxylation domain|Biotin-binding site	GO:0003824|GO:0008152|GO:0016874|GO:0005524|GO:0046872|GO:0004075	NULL	NULL
Dr08506	GO:0016020	NULL	glycosylphosphatidylinositol transamidase	IPR007246|IPR017063	Gaa1-like, GPI transamidase component|Glycosylphosphatidylinositol:protein transamidase complex, GAA1 component	GO:0016021|GO:0042765	NULL	UniPathway: UPA00196
Dr08504	NULL	NULL	NULL	IPR001005|IPR009057|IPR006447|IPR017930	SANT/Myb domain|Homeodomain-like|Myb domain, plants|Myb domain	GO:0003682|GO:0003677	NULL	NULL
Dr08583	NULL	NULL	NULL	IPR001680|IPR007319|IPR011047|IPR015943|IPR017986|IPR019775	WD40 repeat|Small-subunit processome, Utp21|Quinonprotein alcohol dehydrogenase-like superfamily|WD40/YVTN repeat-like-containing domain|WD40-repeat-containing domain|WD40 repeat, conserved site	GO:0005515|GO:0006364|GO:0032040	NULL	NULL
Dr08588	GO:0016020	NULL	protein	IPR002528	Multi antimicrobial extrusion protein	GO:0006855|GO:0015238|GO:0015297|GO:0016020|GO:0055085	NULL	Reactome: REACT_15518|Reactome: REACT_20633
Dr08602	GO:0006289|GO:0006310|GO:0005739|GO:0003910|GO:0009536|GO:0003677|GO:0005524|GO:0051103|GO:0005694|GO:0006273|GO:0005634	EC:6.5.1.1	dna ligase	IPR012310|IPR012308|IPR012309|IPR012340|IPR016059	DNA ligase, ATP-dependent, central|DNA ligase, ATP-dependent, N-terminal|DNA ligase, ATP-dependent, C-terminal|Nucleic acid-binding, OB-fold|DNA ligase, ATP-dependent, conserved site	GO:0003910|GO:0005524|GO:0006281|GO:0006310|GO:0003677|GO:0003909|GO:0051103	NULL	Reactome: REACT_216
Dr08626	GO:0016023|GO:0016301|GO:0008152|GO:0016020	NULL	probable lrr receptor-like serine threonine-protein kinase at4g36180-like	IPR000719|IPR001611|IPR013210|IPR025875|IPR011009|IPR013320|IPR002290|IPR003591|IPR008271	Protein kinase domain|Leucine-rich repeat|Leucine-rich repeat-containing N-terminal, type 2|Leucine rich repeat 4|Protein kinase-like domain|Concanavalin A-like lectin/glucanase, subgroup|Serine/threonine- / dual specificity protein kinase, catalytic domain|Leucine-rich repeat, typical subtype|Serine/threonine-protein kinase, active site	GO:0004672|GO:0005524|GO:0006468|GO:0005515|GO:0016772|GO:0004674	NULL	NULL
Dr08628	NULL	NULL	NULL	IPR000580|IPR008984|IPR000253	TSC-22 / Dip / Bun|SMAD/FHA domain|Forkhead-associated (FHA) domain	GO:0003700|GO:0006355|GO:0005515	NULL	NULL
Dr08642	NULL	NULL	NULL	IPR005333|IPR017887	Transcription factor, TCP|Transcription factor TCP subgroup	NULL	NULL	NULL
Dr08669	NULL	NULL	NULL	IPR012459	Protein of unknown function DUF1665	NULL	NULL	NULL
Dr08677	GO:0043232|GO:0006974|GO:0031981	NULL	hus1 protein	IPR007150	Checkpoint protein Hus1/Mec3	GO:0000077|GO:0006281|GO:0030896	NULL	NULL
Dr08680	GO:0005739	NULL	wapl (wings apart-like protein regulation of heterochromatin) protein	IPR022771|IPR016024	Wings apart-like protein|Armadillo-type fold	GO:0005488	NULL	NULL
Dr08651	GO:0016874	NULL	vacuolar protein 8-like	IPR021325|IPR016024|IPR011989|IPR000225	Protein of unknown function DUF2930|Armadillo-type fold|Armadillo-like helical|Armadillo	GO:0005488|GO:0005515	NULL	NULL
Dr23047	GO:0006457|GO:0006950|GO:0005524|GO:0051082|GO:0005739	NULL	heat-shock protein	IPR001404|IPR020568|IPR003594|IPR020575|IPR019805	Heat shock protein Hsp90 family|Heat shock protein Hsp90, N-terminal|Ribosomal protein S5 domain 2-type fold|Histidine kinase-like ATPase, ATP-binding domain|Heat shock protein Hsp90, conserved site	GO:0005524|GO:0006457|GO:0006950|GO:0051082	NULL	NULL
Dr08713	NULL	NULL	NULL	IPR002885|IPR011990	Pentatricopeptide repeat|Tetratricopeptide-like helical	GO:0005515	NULL	NULL
Dr08748	GO:0016830|GO:0009536	NULL	2-keto-3-deoxy-l-rhamnonate aldolase-like	IPR005000|IPR015813	Aldehyde-lyase domain|Pyruvate/Phosphoenolpyruvate kinase-like domain	GO:0006725|GO:0016830|GO:0003824	NULL	NULL
Dr08813	GO:0005886|GO:0009504	NULL	novel plant snare 11	IPR000727	Target SNARE coiled-coil domain	GO:0005515	NULL	NULL
Dr08809	GO:0090305|GO:0003676|GO:0004518	NULL	protein dom3z-like protein	IPR001806|IPR013961|IPR027417|IPR003578	Small GTPase superfamily|RAI1-like|P-loop containing nucleoside triphosphate hydrolase|Small GTPase superfamily, Rho type	GO:0005525|GO:0007264|GO:0005622	EC:3.6.1.-	KEGG: 00230+3.6.1.-|KEGG: 00790+3.6.1.-|Reactome: REACT_11044
Dr08829	GO:0005488	NULL	homolog subfamily c member	IPR009057|IPR001005|IPR017877|IPR017884	Homeodomain-like|SANT/Myb domain|Myb-like domain|SANT domain	GO:0003677|GO:0003682	NULL	NULL
Dr08890	GO:0016020|GO:0009507|GO:0016757	NULL	c2 domain-containing protein	IPR000008|IPR013583	C2 domain|Phosphoribosyltransferase C-terminal	GO:0005515	NULL	NULL
Dr08896	NULL	NULL	NULL	IPR001680|IPR017986|IPR015943	WD40 repeat|WD40-repeat-containing domain|WD40/YVTN repeat-like-containing domain	GO:0005515	NULL	NULL
Dr08897	GO:0009536	NULL	protein	IPR000008|IPR000225|IPR016024|IPR021109|IPR011989|IPR001969	C2 domain|Armadillo|Armadillo-type fold|Aspartic peptidase domain|Armadillo-like helical|Aspartic peptidase, active site	GO:0005515|GO:0005488|GO:0004190|GO:0006508	NULL	NULL
Dr08927	GO:0048509|GO:0005886|GO:0009908	NULL	leucine rich repeat receptor like protein clavata2	IPR001611|IPR025875|IPR003591	Leucine-rich repeat|Leucine rich repeat 4|Leucine-rich repeat, typical subtype	GO:0005515	NULL	NULL
Dr08871	NULL	NULL	NULL	IPR011990|IPR019734|IPR013026	Tetratricopeptide-like helical|Tetratricopeptide repeat|Tetratricopeptide repeat-containing domain	GO:0005515	NULL	NULL
Dr08875	NULL	NULL	NULL	IPR005333|IPR017887	Transcription factor, TCP|Transcription factor TCP subgroup	NULL	NULL	NULL
Dr08901	GO:0003887|GO:0006260|GO:0003677|GO:0000166|GO:0042575	EC:2.7.7.7	dna polymerase delta catalytic subunit	IPR006134|IPR006133|IPR012337|IPR023211|IPR006172|IPR004578|IPR017964	DNA-directed DNA polymerase, family B, multifunctional domain|DNA-directed DNA polymerase, family B, exonuclease domain|DNA-directed DNA polymerase, family B|Ribonuclease H-like domain|DNA polymerase, palm domain|DNA-directed DNA polymerase, family B, pol2|DNA-directed DNA polymerase, family B, conserved site	GO:0000166|GO:0003677|GO:0003887|GO:0006260|GO:0003676|GO:0006139	EC:2.7.7.7	KEGG: 00230+2.7.7.7|KEGG: 00240+2.7.7.7
Dr08881	GO:0003676|GO:0000166	NULL	mrna splicing	IPR000504|IPR026896|IPR025742|IPR012677	RNA recognition motif domain|Transcription termination and cleavage factor C-terminal domain|Cleavage stimulation factor subunit 2, hinge domain|Nucleotide-binding, alpha-beta plait	GO:0003676|GO:0000166	NULL	NULL
Dr08976	NULL	NULL	NULL	IPR004843	Phosphoesterase domain	GO:0016787	NULL	NULL
Dr08979	GO:0032313	NULL	rab gtpase activator protein	IPR000195	Rab-GTPase-TBC domain	GO:0005097|GO:0032313	NULL	NULL
Dr08999	GO:0048731|GO:0006468|GO:0004674|GO:0004872|GO:0044767|GO:0016023|GO:0005524|GO:0042803|GO:0016020|GO:0009069|GO:0007165	EC:2.7.11.0	protein	IPR001245|IPR009091|IPR011009|IPR013320|IPR002290|IPR000719|IPR000408|IPR001368|IPR017441|IPR008271	Serine-threonine/tyrosine-protein kinase catalytic domain|Regulator of chromosome condensation 1/beta-lactamase-inhibitor protein II|Protein kinase-like domain|Concanavalin A-like lectin/glucanase, subgroup|Serine/threonine- / dual specificity protein kinase, catalytic domain|Protein kinase domain|Regulator of chromosome condensation, RCC1|TNFR/NGFR cysteine-rich region|Protein kinase, ATP bindin…	GO:0004672|GO:0006468|GO:0016772|GO:0005524|GO:0005515|GO:0004674	NULL	NULL
Dr09003	GO:0010019|GO:0009507|GO:0046906|GO:0019899	NULL	tetrapyrrole-binding chloroplastic-like	IPR008629	GUN4-like	NULL	NULL	NULL
Dr09071	GO:0006351	NULL	gras family transcription factor	IPR005202	Transcription factor GRAS	NULL	NULL	NULL
Dr09108	NULL	NULL	NULL	IPR000403	Phosphatidylinositol 3-/4-kinase, catalytic domain	GO:0016773	NULL	NULL
Dr09119	GO:0009536	NULL	pentatricopeptide repeat-containing protein	IPR002885|IPR011990	Pentatricopeptide repeat|Tetratricopeptide-like helical	GO:0005515	NULL	NULL
Dr09107	NULL	NULL	NULL	IPR002885|IPR011990	Pentatricopeptide repeat|Tetratricopeptide-like helical	GO:0005515	NULL	NULL
Dr09113	NULL	NULL	NULL	IPR002885	Pentatricopeptide repeat	NULL	NULL	NULL
Dr09163	NULL	NULL	NULL	IPR008590	Protein of unknown function DUF872, transmembrane	NULL	NULL	NULL
Dr09219	GO:0016020|GO:0006863|GO:0005345|GO:0009536|GO:0055085	NULL	adenine guanine permease azg1-like	IPR006043	Xanthine/uracil/vitamin C permease	GO:0005215|GO:0006810|GO:0016020|GO:0055085	NULL	NULL
Dr09230	GO:0005618|GO:0046872|GO:0009252|GO:0005524|GO:0009507|GO:0008716|GO:0046436	EC:6.3.2.4	d-alanine--d-alanine ligase family protein	IPR005905|IPR011127|IPR011095|IPR016185|IPR013816|IPR011761|IPR000291	D-alanine--D-alanine ligase|D-alanine--D-alanine ligase, N-terminal domain|D-alanine--D-alanine ligase, C-terminal|Pre-ATP-grasp domain|ATP-grasp fold, subdomain 2|ATP-grasp fold|D-alanine--D-alanine ligase/VANA/B/C, conserved site	GO:0005737|GO:0008716|GO:0009252|GO:0005524|GO:0046872	EC:6.3.2.4	KEGG: 00473+6.3.2.4|KEGG: 00550+6.3.2.4|MetaCyc: PWY-6386|MetaCyc: PWY-6387|UniPathway: UPA00219
Dr09231	GO:0008270	NULL	e3 ubiquitin-protein ligase listerin-like	IPR001841|IPR016024|IPR011989|IPR013083|IPR011016	Zinc finger, RING-type|Armadillo-type fold|Armadillo-like helical|Zinc finger, RING/FYVE/PHD-type|Zinc finger, RING-CH-type	GO:0005515|GO:0008270|GO:0005488	EC:6.3.2.-	KEGG: 00300+6.3.2.-|KEGG: 00380+6.3.2.-|UniPathway: UPA00143
Dr09284	NULL	NULL	NULL	NULL	NULL	NULL	NULL	NULL
Dr09251	GO:0008152|GO:0005886|GO:0003824	NULL	long chain acyl- synthetase 4-like	IPR000873|IPR020845	AMP-dependent synthetase/ligase|AMP-binding, conserved site	GO:0003824|GO:0008152	NULL	NULL
Dr09302	GO:0044425|GO:0031966	NULL	protein	IPR005678|IPR003397	Mitochondrial inner membrane translocase complex, subunit Tim17|Mitochondrial inner membrane translocase subunit Tim17/Tim22/Tim23/peroxisomal protein PMP24	GO:0005744|GO:0006886|GO:0015450	NULL	NULL
Dr09239	GO:0006810|GO:0042626|GO:0009536|GO:0043190|GO:0005524	NULL	white-brown-complex abc transporter family	IPR003439|IPR013525|IPR027417|IPR003593|IPR017871	ABC transporter-like|ABC-2 type transporter|P-loop containing nucleoside triphosphate hydrolase|AAA+ ATPase domain|ABC transporter, conserved site	GO:0005524|GO:0016887|GO:0016020|GO:0000166|GO:0017111	NULL	NULL
Dr09270	GO:0047220|GO:0005794|GO:0006486|GO:0016021|GO:0005739|GO:0030206	EC:2.4.1.134	probable beta- -galactosyltransferase 11-like	IPR002659|IPR025298	Glycosyl transferase, family 31|Domain of unknown function DUF4094	GO:0006486|GO:0008378|GO:0016020	EC:2.4.1.-	UniPathway: UPA00378|KEGG: 00051+2.4.1.-|KEGG: 00512+2.4.1.-|KEGG: 00513+2.4.1.-|KEGG: 00514+2.4.1.-|KEGG: 00522+2.4.1.-|KEGG: 00533+2.4.1.-|KEGG: 00540+2.4.1.-|KEGG: 00550+2.4.1.-|KEGG: 00561+2.4.1.-|KEGG: 00563+2.4.1.-|KEGG: 00600+2.4.1.-|KEGG: 00601+2.4.1.-|KEGG: 00603+2.4.1.-|KEGG: 00604+2.4.1.-|KEGG: 00906+2.4.1.-|KEGG: 00908+2.4.1.-|KEGG: 00941+2.4.1.-|KEGG: 00942+2.4.1.-|KEGG: 00944+2.4.1.…
Dr09279	NULL	NULL	NULL	IPR006906|IPR007725	Timeless protein|Timeless C-terminal	NULL	NULL	NULL
Dr09258	NULL	NULL	NULL	IPR002885|IPR011990	Pentatricopeptide repeat|Tetratricopeptide-like helical	GO:0005515	NULL	NULL
Dr09271	GO:0009536	NULL	proline-rich cell wall	IPR009060	UBA-like	GO:0005515	NULL	NULL
Dr09318	NULL	NULL	NULL	IPR001611|IPR003591	Leucine-rich repeat|Leucine-rich repeat, typical subtype	GO:0005515	NULL	NULL
Dr09355	GO:0003825|GO:0004805|GO:0051301|GO:0005992|GO:0009832|GO:0005737|GO:0010182|GO:0009793|GO:0005982|GO:0005985	EC:2.4.1.15|EC:3.1.3.12	#NAME?	IPR001830|IPR003337|IPR023214|IPR012766	Glycosyl transferase, family 20|Trehalose-phosphatase|HAD-like domain|Alpha,alpha-trehalose-phosphate synthase	GO:0003824|GO:0005992|GO:0003825	EC:2.4.1.15	KEGG: 00500+2.4.1.15
Dr09361	NULL	NULL	NULL	IPR006041|IPR003882	Pollen Ole e 1 allergen/extensin|Pistil-specific extensin-like protein	GO:0005199	NULL	NULL
Dr09364	GO:0005739	NULL	pentatricopeptide repeat-containing protein mitochondrial-like	IPR002885	Pentatricopeptide repeat	NULL	NULL	NULL
Dr09371	GO:0010223|GO:0055114|GO:0016121|GO:0009926|GO:0009965|GO:0009733|GO:0003834|GO:0009570|GO:0016124|GO:0042572	EC:1.14.99.36	dioxygenase ramosus1	IPR004294	Carotenoid oxygenase	NULL	NULL	NULL
Dr09502	NULL	NULL	NULL	IPR001810	F-box domain	GO:0005515	NULL	NULL
Dr09506	GO:0048046|GO:0016491|GO:0045735|GO:0030145	NULL	germin-like protein	IPR006045|IPR011051|IPR014710|IPR001929	Cupin 1|Germin|RmlC-like cupin domain|RmlC-like jelly roll fold	GO:0045735|GO:0030145	NULL	NULL
Dr09509	GO:0016757|GO:0016491|GO:0003676|GO:0008152	NULL	poly	IPR001357|IPR012317|IPR004102|IPR008893|IPR012982	BRCT domain|Poly(ADP-ribose) polymerase, catalytic domain|Poly(ADP-ribose) polymerase, regulatory domain|WGR domain|PADR1	GO:0003950|GO:0006471|GO:0005634	NULL	NULL
Dr09535	GO:0004743|GO:0046686|GO:0005886|GO:0016310|GO:0030955|GO:0000287|GO:0006096|GO:0006094|GO:0006144|GO:0015976	EC:2.7.1.40	pyruvate cytosolic isozyme-like	IPR001697|IPR015793|IPR015795|IPR011037|IPR015813|IPR015806|IPR015794	Pyruvate kinase|Pyruvate kinase, barrel|Pyruvate kinase, C-terminal|Pyruvate kinase-like, insert domain|Pyruvate/Phosphoenolpyruvate kinase-like domain|Pyruvate kinase, beta-barrel insert domain|Pyruvate kinase, alpha/beta	GO:0000287|GO:0004743|GO:0006096|GO:0030955|GO:0003824	EC:2.7.1.40	KEGG: 00010+2.7.1.40|KEGG: 00230+2.7.1.40|KEGG: 00620+2.7.1.40|MetaCyc: PWY-1042|MetaCyc: PWY-2221|MetaCyc: PWY-5484|MetaCyc: PWY-5723|MetaCyc: PWY-6142|MetaCyc: PWY-6886|MetaCyc: PWY-6901|MetaCyc: PWY-7003|MetaCyc: PWY-7218|Reactome: REACT_474|UniPathway: UPA00109
Dr09429	GO:0016020	NULL	multidrug and toxin extrusion protein 1-like	IPR002528	Multi antimicrobial extrusion protein	GO:0006855|GO:0015238|GO:0015297|GO:0016020|GO:0055085	NULL	Reactome: REACT_15518|Reactome: REACT_20633
Dr09374	NULL	NULL	NULL	IPR000408|IPR009091	Regulator of chromosome condensation, RCC1|Regulator of chromosome condensation 1/beta-lactamase-inhibitor protein II	NULL	NULL	NULL
Dr09444	GO:0016023|GO:0004185|GO:0006508	EC:3.4.16.0	serine carboxypeptidase-like 50-like	IPR001563|IPR018202	Peptidase S10, serine carboxypeptidase|Peptidase S10, serine carboxypeptidase, active site	GO:0004185|GO:0006508	NULL	NULL
Dr09382	NULL	NULL	NULL	NULL	NULL	NULL	NULL	NULL
Dr09393	GO:0050660|GO:0016020|GO:0005509|GO:0008812|GO:0055114|GO:0006066|GO:0006544|GO:0006563|GO:0006566	EC:1.1.99.1	calcium-binding ef hand family protein	IPR007867|IPR011992|IPR002048|IPR018247	Glucose-methanol-choline oxidoreductase, C-terminal|EF-hand domain pair|EF-hand domain|EF-Hand 1, calcium-binding site	GO:0016614|GO:0055114|GO:0005509	NULL	NULL
Dr09399	NULL	NULL	NULL	IPR021899	Protein of unknown function DUF3511	NULL	NULL	NULL
Dr09451	NULL	NULL	NULL	IPR002885|IPR011990	Pentatricopeptide repeat|Tetratricopeptide-like helical	GO:0005515	NULL	NULL
Dr00692	GO:0010218|GO:0010541|GO:0016023|GO:0043190|GO:0009958|GO:0009624|GO:0016021|GO:0043481|GO:0010329|GO:0009640|GO:0010540|GO:0008361|GO:0048527|GO:0009637|GO:0010315|GO:0008559|GO:0006200|GO:0005886|GO:0005524|GO:0048443|GO:0006855	EC:3.6.3.44	abc transporter b family member 19-like	IPR003439|IPR001140|IPR027417|IPR011527|IPR003593|IPR017871	ABC transporter-like|ABC transporter, transmembrane domain|P-loop containing nucleoside triphosphate hydrolase|ABC transporter type 1, transmembrane domain|AAA+ ATPase domain|ABC transporter, conserved site	GO:0005524|GO:0016887|GO:0006810|GO:0016021|GO:0042626|GO:0055085|GO:0000166|GO:0017111	NULL	NULL
Dr00697	GO:0009846|GO:0005886|GO:0006887|GO:0000145|GO:0005829|GO:0009860	NULL	protein sec6	IPR010326	Exocyst complex component Sec6	GO:0000145|GO:0006887	NULL	NULL
Dr00722	NULL	NULL	NULL	NULL	NULL	NULL	NULL	NULL
Dr00741	GO:0048731|GO:0097159|GO:0016491|GO:0016570|GO:1901363	NULL	lysine-specific histone demethylase 1 homolog 1-like	IPR002937|IPR007526|IPR009057|IPR011991|IPR016040|IPR001613	Amine oxidase|SWIRM domain|Flavin amine oxidase|Homeodomain-like|Winged helix-turn-helix DNA-binding domain|NAD(P)-binding domain	GO:0016491|GO:0055114|GO:0005515|GO:0003677	NULL	NULL
Dr00754	GO:0019211|GO:0009536	NULL	phosphotyrosyl phosphatase activator protein	IPR004327	Phosphotyrosyl phosphatase activator, PTPA	GO:0019211	NULL	NULL
Dr00711	GO:0006364|GO:0009536	NULL	rnase l inhibitor protein	IPR022968|IPR007177	Ribosome biogenesis protein|Domain of unknown function DUF367	NULL	NULL	NULL
Dr00796	GO:0005739|GO:0052689	EC:3.1.1.0	probable carboxylesterase 17-like	IPR013094|IPR002168	Alpha/beta hydrolase fold-3|Lipase, GDXG, active site	GO:0008152|GO:0016787	NULL	NULL
Dr00812	GO:0005488|GO:0009536	NULL	myosin-j heavy chain-like	IPR001609|IPR000048|IPR027417	Myosin head, motor domain|IQ motif, EF-hand binding site|P-loop containing nucleoside triphosphate hydrolase	GO:0003774|GO:0005524|GO:0016459|GO:0005515	NULL	NULL
Dr00811	GO:0005488|GO:0050789|GO:0009536	NULL	protein	IPR003340|IPR011124|IPR015300	B3 DNA binding domain|Zinc finger, CW-type|DNA-binding pseudobarrel domain	GO:0003677|GO:0008270	NULL	NULL
Dr00866	GO:0046872	NULL	protein	IPR027711|IPR024964|IPR027370|IPR013083|IPR006595|IPR013144|IPR006594	Rmd5|CTLH/CRA C-terminal to LisH motif domain|RING-type zinc-finger, LisH dimerisation motif|Zinc finger, RING/FYVE/PHD-type|CTLH, C-terminal LisH motif|CRA domain|LisH dimerisation motif	GO:0005515	NULL	NULL
Dr00844	GO:0016874	NULL	u-box domain-containing protein 8-like	IPR003613|IPR016024|IPR011989|IPR013083	U box domain|Armadillo-type fold|Armadillo-like helical|Zinc finger, RING/FYVE/PHD-type	GO:0000151|GO:0004842|GO:0016567|GO:0005488	NULL	NULL
Dr00809	GO:0006810|GO:0009528|GO:0009507	NULL	protein	IPR019109|IPR005691	Protein of unknown function DUF4870|Chloroplast protein import component Tic20	NULL	NULL	NULL
Dr00900	GO:0020037|GO:0016705|GO:0004497|GO:0005506|GO:0009055|GO:0055114|GO:0006118	NULL	cytochrome p450	IPR001128|IPR002401|IPR017972	Cytochrome P450|Cytochrome P450, E-class, group I|Cytochrome P450, conserved site	GO:0005506|GO:0016705|GO:0020037|GO:0055114	NULL	Reactome: REACT_13433
Dr00906	NULL	NULL	NULL	IPR019547	Kua-ubiquitin conjugating enzyme hybrid, localisation	NULL	NULL	NULL
Dr01010	GO:0016021|GO:0009536	NULL	amino acid transporter	IPR013057	Amino acid transporter, transmembrane	NULL	NULL	NULL
Dr00938	NULL	NULL	NULL	IPR006458	Ovate protein family, C-terminal	NULL	NULL	NULL
Dr01002	GO:0005986|GO:0005886|GO:0046524|GO:0005982	EC:2.4.1.14	sucrose phosphate synthase	IPR001296|IPR006380|IPR012819	Glycosyl transferase, family 1|Sucrose-phosphate synthase|Sucrose phosphate synthase, plant	GO:0009058|GO:0005985|GO:0046524	EC:2.4.1.14	KEGG: 00500+2.4.1.14|MetaCyc: PWY-7238|UniPathway: UPA00371
Dr00955	NULL	NULL	NULL	IPR001810|IPR006553	F-box domain|Leucine-rich repeat, cysteine-containing subtype	GO:0005515	NULL	NULL
Dr09543	GO:0009536	NULL	ring-h2 finger protein atl3j	IPR001841|IPR013083	Zinc finger, RING-type|Zinc finger, RING/FYVE/PHD-type	GO:0005515|GO:0008270	NULL	NULL
Dr09556	GO:0016021|GO:0009624	NULL	organic anion	IPR004853	Triose-phosphate transporter domain	NULL	NULL	NULL
Dr23387	NULL	NULL	NULL	IPR002885|IPR011990	Pentatricopeptide repeat|Tetratricopeptide-like helical	GO:0005515	NULL	NULL
Dr09616	GO:0016310|GO:0004672|GO:0009536|GO:0000166	NULL	protein	NULL	NULL	NULL	NULL	NULL
Dr09606	NULL	NULL	NULL	IPR018908	Uncharacterised protein family UPF0546	NULL	NULL	NULL
Dr09625	GO:0016049|GO:1901700|GO:0016043|GO:0044464|GO:0010033	NULL	sdl-1 protein	NULL	NULL	NULL	NULL	NULL
Dr09583	GO:0046872|GO:0022900|GO:0009055|GO:0051537|GO:0009507|GO:0006118	NULL	ferredoxin- chloroplastic-like	IPR001041|IPR012675|IPR010241	2Fe-2S ferredoxin-type domain|Beta-grasp domain|Ferredoxin [2Fe-2S], plant	GO:0009055|GO:0051536|GO:0022900|GO:0051537	NULL	NULL
Dr09587	NULL	NULL	NULL	IPR025422	Transcription factor TGA like domain	GO:0006351|GO:0043565	NULL	NULL
Dr09642	NULL	NULL	NULL	NULL	NULL	NULL	NULL	NULL
Dr09644	GO:0050794	NULL	abscisic acid receptor pyr1	IPR019587|IPR023393	Polyketide cyclase/dehydrase|START-like domain	NULL	NULL	NULL
Dr09735	GO:0008453|GO:0030170|GO:0046686|GO:0005886|GO:0008270|GO:0005739|GO:0006522|GO:0006531|GO:0006544|GO:0006563|GO:0006566	EC:2.6.1.44	alanine--glyoxylate aminotransferase 2 homolog mitochondrial-like	IPR005814|IPR015424|IPR015421|IPR015422	Aminotransferase class-III|Pyridoxal phosphate-dependent transferase|Pyridoxal phosphate-dependent transferase, major region, subdomain 1|Pyridoxal phosphate-dependent transferase, major region, subdomain 2	GO:0008483|GO:0030170|GO:0003824	NULL	NULL
Dr09719	NULL	NULL	NULL	NULL	NULL	NULL	NULL	NULL
Dr09742	GO:0004553|GO:0005618|GO:0005975	EC:3.2.1.0	xylan 1 4-beta-xylosidase	IPR026892|IPR001764|IPR002772|IPR017853|IPR013785|IPR006638|IPR003698	Glycoside hydrolase family 3|Glycoside hydrolase, family 3, N-terminal|Glycoside hydrolase family 3 C-terminal domain|Glycoside hydrolase, superfamily|Aldolase-type TIM barrel|Elongator protein 3/MiaB/NifB|Lipoyl synthase	GO:0004553|GO:0005975|GO:0003824|GO:0051536|GO:0009107|GO:0016992|GO:0051539	EC:2.8.1.8	KEGG: 00785+2.8.1.8|MetaCyc: PWY-6987|UniPathway: UPA00538
Dr09767	GO:0005739	NULL	zinc finger (ran-binding) domain-containing protein	IPR000086|IPR001876|IPR015797|IPR020084	NUDIX hydrolase domain|Zinc finger, RanBP2-type|NUDIX hydrolase domain-like|NUDIX hydrolase, conserved site	GO:0016787|GO:0008270	NULL	NULL
Dr09780	GO:0000166	NULL	interferon-induced gtp-binding protein	IPR022812|IPR001401|IPR000375|IPR003130|IPR027417|IPR020850	Dynamin superfamily|Dynamin, GTPase domain|Dynamin central domain|Dynamin GTPase effector|P-loop containing nucleoside triphosphate hydrolase|GTPase effector domain, GED	GO:0003924|GO:0005525	NULL	NULL
Dr09793	NULL	NULL	NULL	NULL	NULL	NULL	NULL	NULL
Dr09799	GO:0005739	NULL	ubiquitin carboxyl-terminal hydrolase-like protein	IPR021099	Plant organelle RNA recognition domain	NULL	NULL	NULL
Dr09718	GO:0005739	NULL	pentatricopeptide repeat-containing protein	IPR002885|IPR011990	Pentatricopeptide repeat|Tetratricopeptide-like helical	GO:0005515	NULL	NULL
Dr09867	NULL	NULL	NULL	NULL	NULL	NULL	NULL	NULL
Dr09802	NULL	NULL	NULL	IPR013598|IPR016024	Exportin-1/Importin-beta-like|Armadillo-type fold	GO:0005488	NULL	NULL
Dr09820	GO:0018208|GO:0044436|GO:0016853|GO:0009507|GO:0016020	NULL	protein	IPR023566|IPR001179	Peptidyl-prolyl cis-trans isomerase, FKBP-type|Peptidyl-prolyl cis-trans isomerase, FKBP-type, domain	GO:0006457	NULL	NULL
Dr09863	GO:0005789|GO:0030170|GO:0008117|GO:0016831|GO:0030149|GO:0016021|GO:0019752|GO:0006915|GO:0006687	EC:4.1.2.27|EC:4.1.1.0	sphingosine-1-phosphate lyase	IPR002129|IPR015424|IPR015421	Pyridoxal phosphate-dependent decarboxylase|Pyridoxal phosphate-dependent transferase|Pyridoxal phosphate-dependent transferase, major region, subdomain 1	GO:0016831|GO:0019752|GO:0030170|GO:0003824	NULL	NULL
Dr09876	GO:0008270|GO:0000166|GO:0003723	NULL	splicing factor 1	IPR004088|IPR000504|IPR001878|IPR012677|IPR004087	K Homology domain, type 1|RNA recognition motif domain|Zinc finger, CCHC-type|Nucleotide-binding, alpha-beta plait|K Homology domain	GO:0003723|GO:0003676|GO:0008270|GO:0000166	NULL	NULL
Dr09953	GO:0016023	NULL	pvr3-like protein	IPR016140	Bifunctional inhibitor/plant lipid transfer protein/seed storage helical domain	NULL	NULL	NULL
Dr09985	GO:0005739|GO:0009507	NULL	sec14 cytosolic factor-like	IPR001251|IPR011074	CRAL-TRIO domain|CRAL/TRIO, N-terminal domain	NULL	NULL	NULL
Dr09987	NULL	NULL	NULL	IPR002885|IPR011990	Pentatricopeptide repeat|Tetratricopeptide-like helical	GO:0005515	NULL	NULL
Dr09997	GO:0009504|GO:0005886|GO:0000910|GO:0005635|GO:0032153|GO:0009507|GO:0005783|GO:0009651	NULL	protein	IPR025265|IPR003590	WPP domain|Leucine-rich repeat, ribonuclease inhibitor subtype	NULL	NULL	NULL
Dr10045	GO:0005488	NULL	exonuclease-like protein	IPR012337|IPR006055|IPR007087	Ribonuclease H-like domain|Exonuclease|Zinc finger, C2H2	GO:0003676|GO:0004527|GO:0046872	NULL	NULL
Dr10047	GO:0005488|GO:0016787|GO:0016070	NULL	metal-dependent phosphohydrolase hd domain-containing protein	IPR006674|IPR003607	HD domain|HD/PDEase domain	GO:0008081|GO:0046872|GO:0003824	NULL	NULL
Dr09917	GO:0003746|GO:0006184|GO:0003924|GO:0005525|GO:0005840|GO:0006448	NULL	elongation factor ef-2	IPR000795|IPR000640|IPR004161|IPR009022|IPR009000|IPR027417|IPR020568|IPR014721	Elongation factor, GTP-binding domain|Translation elongation factor EFG, V domain|Translation elongation factor EFTu/EF1A, domain 2|Elongation factor G, III-V domain|Translation protein, beta-barrel domain|P-loop containing nucleoside triphosphate hydrolase|Ribosomal protein S5 domain 2-type fold|Ribosomal protein S5 domain 2-type fold, subgroup	GO:0003924|GO:0005525	NULL	NULL
Dr09926	GO:0016192|GO:0006886|GO:0030117	NULL	ap-4 complex subunit epsilon-like	IPR017109|IPR000719|IPR002553|IPR016024|IPR011009|IPR011989|IPR002290|IPR008271	Adaptor protein complex AP-4, epsilon subunit|Protein kinase domain|Clathrin/coatomer adaptor, adaptin-like, N-terminal|Armadillo-type fold|Protein kinase-like domain|Armadillo-like helical|Serine/threonine- / dual specificity protein kinase, catalytic domain|Serine/threonine-protein kinase, active site	GO:0004672|GO:0005524|GO:0006468|GO:0006886|GO:0016192|GO:0030117|GO:0005488|GO:0016772|GO:0004674	NULL	NULL
Dr09965	GO:0004185|GO:0006508	EC:3.4.16.0	serine carboxypeptidase-like protein	IPR001563|IPR018202	Peptidase S10, serine carboxypeptidase|Peptidase S10, serine carboxypeptidase, active site	GO:0004185|GO:0006508	NULL	NULL
Dr10107	GO:0009536	NULL	uncharacterized protein	IPR007572	Uncharacterised protein family Ycf20	NULL	NULL	NULL
Dr10075	NULL	NULL	NULL	NULL	NULL	NULL	NULL	NULL
Dr10082	NULL	NULL	NULL	NULL	NULL	NULL	NULL	NULL
Dr10106	GO:0005886	NULL	uncharacterized protein	IPR006943	Domain of unknown function DUF641, plant	NULL	NULL	NULL
Dr10123	NULL	NULL	NULL	IPR015797	NUDIX hydrolase domain-like	GO:0016787	NULL	NULL
Dr10077	NULL	NULL	NULL	IPR007700|IPR021864	Protein of unknown function DUF668|Protein of unknown function DUF3475	NULL	NULL	NULL
Dr10205	GO:0006468|GO:0010555|GO:0009651|GO:0009409|GO:0009611|GO:0043266|GO:0005524|GO:0051365|GO:0007165|GO:0004683|GO:0009069	EC:2.7.11.17	cbl-interacting serine threonine-protein kinase 9	IPR000719|IPR004041|IPR011009|IPR002290|IPR018451|IPR017441|IPR008271	Protein kinase domain|NAF domain|Protein kinase-like domain|Serine/threonine- / dual specificity protein kinase, catalytic domain|NAF/FISL domain|Protein kinase, ATP binding site|Serine/threonine-protein kinase, active site	GO:0004672|GO:0005524|GO:0006468|GO:0007165|GO:0016772|GO:0004674	NULL	NULL
Dr10237	GO:0006306|GO:0003677|GO:0008168	EC:2.1.1.0	dna methyltransferase-2	IPR001525	C-5 cytosine methyltransferase	GO:0003677|GO:0006306|GO:0008168	EC:2.1.1.37	KEGG: 00270+2.1.1.37
Dr10202	NULL	NULL	NULL	NULL	NULL	NULL	NULL	NULL
Dr10236	GO:0016023|GO:0004672|GO:0006468|GO:0000166	NULL	probable receptor-like protein kinase at5g20050-like	IPR000719|IPR003140|IPR011009|IPR013320|IPR002290|IPR017441|IPR008271	Protein kinase domain|Phospholipase/carboxylesterase/thioesterase|Protein kinase-like domain|Concanavalin A-like lectin/glucanase, subgroup|Serine/threonine- / dual specificity protein kinase, catalytic domain|Protein kinase, ATP binding site|Serine/threonine-protein kinase, active site	GO:0004672|GO:0005524|GO:0006468|GO:0016787|GO:0016772|GO:0004674	NULL	NULL
Dr10241	GO:0016020|GO:0003824	NULL	alpha beta fold family protein	IPR001025|IPR000639	Bromo adjacent homology (BAH) domain|Epoxide hydrolase-like	GO:0003677|GO:0003824	NULL	NULL
Dr10161	GO:0006351	NULL	gras family transcription factor	IPR005202	Transcription factor GRAS	NULL	NULL	NULL
Dr10261	GO:0005739	NULL	pentatricopeptide repeat-containing protein mitochondrial-like	IPR002885|IPR011990	Pentatricopeptide repeat|Tetratricopeptide-like helical	GO:0005515	NULL	NULL
Dr10264	NULL	NULL	NULL	NULL	NULL	NULL	NULL	NULL
Dr10349	NULL	NULL	NULL	IPR025322	Protein of unknown function DUF4228, plant	NULL	NULL	NULL
Dr10354	GO:0010540|GO:0006468|GO:0004674|GO:0009414|GO:0042538|GO:0005524|GO:0007165|GO:0007275|GO:0009069	EC:2.7.11.0	cbl-interacting protein kinase	IPR020636|IPR000719|IPR004041|IPR011009|IPR002290|IPR018451|IPR017441|IPR008271	Calcium/calmodulin-dependent/calcium-dependent protein kinase|Protein kinase domain|NAF domain|Protein kinase-like domain|Serine/threonine- / dual specificity protein kinase, catalytic domain|NAF/FISL domain|Protein kinase, ATP binding site|Serine/threonine-protein kinase, active site	GO:0004672|GO:0005524|GO:0006468|GO:0007165|GO:0016772|GO:0004674	NULL	NULL
Dr10489	GO:0015385|GO:0055085|GO:0044464|GO:0006885|GO:0016021|GO:0006814|GO:0015992	NULL	na+ h+ antiporter	IPR018422|IPR006153|IPR004709	Cation/H+ exchanger, CPA1 family|Cation/H+ exchanger|Na+/H+ exchanger	GO:0006812|GO:0015299|GO:0016021|GO:0055085|GO:0006814|GO:0006885|GO:0015385	NULL	Reactome: REACT_15518
Dr01058	GO:0044763|GO:0044707|GO:0044444|GO:0009856	NULL	probable exocyst complex component 6-like	IPR007225	Exocyst complex subunit Sec15-like	GO:0000145|GO:0006904	NULL	NULL
Dr01319	GO:0016023	NULL	pentatricopeptide repeat-containing protein	IPR002885|IPR011990	Pentatricopeptide repeat|Tetratricopeptide-like helical	GO:0005515	NULL	NULL
Dr01328	NULL	NULL	NULL	IPR002885	Pentatricopeptide repeat	NULL	NULL	NULL
Dr01347	GO:0003746|GO:0006351|GO:0005840|GO:0006448	NULL	transcription elongation factor 1	IPR007808	Transcription elongation factor 1	NULL	NULL	NULL
Dr01388	NULL	NULL	NULL	IPR012876	Protein of unknown function DUF1677, plant	NULL	NULL	NULL
Dr01396	GO:0005886|GO:0006468|GO:0005524|GO:0004674|GO:0009069	EC:2.7.11.0	probable serine threonine-protein kinase at1g54610-like	IPR000719|IPR011009|IPR002290|IPR017441|IPR008271	Protein kinase domain|Protein kinase-like domain|Serine/threonine- / dual specificity protein kinase, catalytic domain|Protein kinase, ATP binding site|Serine/threonine-protein kinase, active site	GO:0004672|GO:0005524|GO:0006468|GO:0016772|GO:0004674	NULL	NULL
Dr01421	GO:0005739	NULL	mitochondrial ribosomal protein l37	IPR013870	Ribosomal protein L37, mitochondrial	NULL	NULL	NULL
Dr01389	GO:0045597|GO:0006355|GO:0010075|GO:0009965|GO:0008284|GO:0080060|GO:0043565|GO:0048263|GO:0003700|GO:0009733|GO:0010067|GO:0010072|GO:0010089|GO:0005667|GO:0045449	NULL	homeobox-leucine zipper protein athb-15-like	IPR001356|IPR002913|IPR013978|IPR009057|IPR023393	Homeobox domain|START domain|MEKHLA|Homeodomain-like|START-like domain	GO:0003700|GO:0006355|GO:0043565|GO:0008289|GO:0003677	NULL	NULL
Dr01430	GO:0005739	NULL	pentatricopeptide repeat-containing protein at2g15690-like	IPR002885	Pentatricopeptide repeat	NULL	NULL	NULL
Dr01358	GO:0005829|GO:0032550|GO:0042736|GO:0043168|GO:0006741|GO:0003951|GO:0019674|GO:0016310|GO:0032559|GO:0006769|GO:0046497	EC:2.7.1.86|EC:2.7.1.23	nadh kinase	IPR002504|IPR016064|IPR017437|IPR017438	Inorganic polyphosphate/ATP-NAD kinase, predicted|ATP-NAD kinase-like domain|ATP-NAD kinase, PpnK-type, all-beta|Inorganic polyphosphate/ATP-NAD kinase, domain 1	GO:0003951|GO:0006741|GO:0008152|GO:0019674	EC:2.7.1.23	KEGG: 00760+2.7.1.23|MetaCyc: PWY-5083|MetaCyc: PWY-7268|MetaCyc: PWY-7269
Dr01526	GO:0005515|GO:0043231	NULL	mar-binding filament-like protein 1-1-like	NULL	NULL	NULL	NULL	NULL
Dr01546	GO:0003824	NULL	3-hydroxyisobutyryl- hydrolase-like protein	IPR001753	Crotonase superfamily	GO:0003824|GO:0008152	NULL	NULL
Dr01464	NULL	NULL	NULL	IPR021025	Fanconi Anaemia group E protein, C-terminal	NULL	NULL	NULL
Dr01472	GO:0050794	NULL	protein twin lov 1	IPR003657|IPR000014|IPR001610	DNA-binding WRKY|PAS domain|PAC motif	GO:0003700|GO:0006355|GO:0043565|GO:0004871|GO:0007165	NULL	NULL
Dr01499	NULL	NULL	NULL	NULL	NULL	NULL	NULL	NULL
Dr01107	GO:0044699|GO:0005739	NULL	sec12-like protein 1-like	IPR001680|IPR017986|IPR015943	WD40 repeat|WD40-repeat-containing domain|WD40/YVTN repeat-like-containing domain	GO:0005515	NULL	NULL
Dr01173	GO:0006511	NULL	ubiquitin fusion degradation protein	IPR004854	Ubiquitin fusion degradation protein UFD1	GO:0006511	NULL	NULL
Dr01129	GO:0005739	NULL	pentatricopeptide repeat-containing	IPR002885|IPR020683	Pentatricopeptide repeat|Ankyrin repeat-containing domain	NULL	NULL	NULL
Dr01166	GO:0050832|GO:0005576|GO:0031640	NULL	thaumatin-like protein	IPR001938|IPR017949	Thaumatin|Thaumatin, conserved site	NULL	NULL	NULL
Dr01191	GO:0046872|GO:0016491|GO:0016829	NULL	hydroperoxide lyase	IPR001128|IPR002403	Cytochrome P450|Cytochrome P450, E-class, group IV	GO:0005506|GO:0016705|GO:0020037|GO:0055114|GO:0004497	NULL	Reactome: REACT_13433
Dr01199	GO:0005739	NULL	ubiquitin carboxyl-terminal hydrolase-like protein	IPR021099	Plant organelle RNA recognition domain	NULL	NULL	NULL
Dr01247	NULL	NULL	NULL	IPR002885|IPR011990	Pentatricopeptide repeat|Tetratricopeptide-like helical	GO:0005515	NULL	NULL
Dr01295	GO:0009788|GO:0006468|GO:0004674|GO:0005524|GO:0009069	EC:2.7.11.0	serine-threonine kinase	IPR020636|IPR000719|IPR004041|IPR011009|IPR002290|IPR018451|IPR017441|IPR008271	Calcium/calmodulin-dependent/calcium-dependent protein kinase|Protein kinase domain|NAF domain|Protein kinase-like domain|Serine/threonine- / dual specificity protein kinase, catalytic domain|NAF/FISL domain|Protein kinase, ATP binding site|Serine/threonine-protein kinase, active site	GO:0004672|GO:0005524|GO:0006468|GO:0007165|GO:0016772|GO:0004674	NULL	NULL
Dr01279	NULL	NULL	NULL	IPR006121	Heavy metal-associated domain, HMA	GO:0030001|GO:0046872	NULL	NULL
Dr10556	GO:0000502|GO:0005618	NULL	26s proteasome non-atpase regulatory subunit 10	IPR002110|IPR007493|IPR020683	Ankyrin repeat|Protein of unknown function DUF538|Ankyrin repeat-containing domain	GO:0005515	NULL	NULL
Dr10589	NULL	NULL	NULL	IPR002885|IPR011990	Pentatricopeptide repeat|Tetratricopeptide-like helical	GO:0005515	NULL	NULL
Dr10599	NULL	NULL	NULL	IPR002885|IPR011990	Pentatricopeptide repeat|Tetratricopeptide-like helical	GO:0005515	NULL	NULL
Dr10609	GO:0006355	NULL	gras family transcription factor	IPR005202	Transcription factor GRAS	NULL	NULL	NULL
Dr10562	GO:0016023|GO:0016020	NULL	uncharacterized protein	NULL	NULL	NULL	NULL	NULL
Dr10592	GO:0055085|GO:0044070|GO:0005618|GO:0015288|GO:0009941|GO:0009617|GO:0005741|GO:0008308|GO:0046930|GO:0005886	NULL	porin-like protein	IPR027246|IPR023614	Eukaryotic porin/Tom40|Porin domain	GO:0005741|GO:0055085	NULL	NULL
Dr10618	NULL	NULL	NULL	IPR012442	Protein of unknown function DUF1645, plant	NULL	NULL	NULL
Dr10662	GO:0051501|GO:0046872|GO:0004337|GO:0033384|GO:0009513|GO:0016117|GO:0004311|GO:0004161|GO:0033386|GO:0009507|GO:0016020|GO:0005783|GO:0005739|GO:0045337|GO:0006694	EC:2.5.1.10|EC:2.5.1.29|EC:2.5.1.1	geranylgeranyl pyrophosphate synthase	IPR017446|IPR000092|IPR008949	Polyprenyl synthetase-related|Polyprenyl synthetase|Terpenoid synthase	GO:0008299	NULL	NULL
Dr10646	GO:0005739|GO:0016757	NULL	galactomannan galactosyltransferase	IPR008630	Galactosyl transferase	GO:0016021|GO:0016758	NULL	NULL
Dr10654	GO:0005840|GO:0003735|GO:0006412|GO:0005739|GO:0042254	NULL	ribosomal protein s21 family protein	IPR001911	Ribosomal protein S21	GO:0003735|GO:0005622|GO:0005840|GO:0006412	NULL	NULL
Dr10696	GO:0009536	NULL	pentatricopeptide repeat-containing protein	IPR002885|IPR011990	Pentatricopeptide repeat|Tetratricopeptide-like helical	GO:0005515	NULL	NULL
Dr10717	NULL	NULL	NULL	IPR002885|IPR011990	Pentatricopeptide repeat|Tetratricopeptide-like helical	GO:0005515	NULL	NULL
Dr10731	GO:0044444|GO:0043231	NULL	uncharacterized protein	IPR009688	Domain of unknown function DUF1279	NULL	NULL	NULL
Dr10790	GO:0009941|GO:0009658|GO:0045037|GO:0009528	NULL	chloroplast inner envelope protein	NULL	NULL	NULL	NULL	NULL
Dr10798	GO:0009910|GO:0045893|GO:0016020|GO:0016571	NULL	rna polymerase-associated protein ctr9 homolog	IPR001440|IPR013105|IPR011990|IPR019734|IPR013026	Tetratricopeptide TPR1|Tetratricopeptide TPR2|Tetratricopeptide-like helical|Tetratricopeptide repeat|Tetratricopeptide repeat-containing domain	GO:0005515	NULL	NULL
Dr10806	GO:0010287|GO:0016702	EC:1.13.11.0	probable carotenoid cleavage dioxygenase chloroplastic-like	IPR004294	Carotenoid oxygenase	NULL	NULL	NULL
Dr10796	NULL	NULL	NULL	NULL	NULL	NULL	NULL	NULL
Dr10812	NULL	NULL	NULL	IPR003388|IPR005069	Reticulon|Nucleotide-diphospho-sugar transferase	NULL	NULL	NULL
Dr10861	NULL	NULL	NULL	NULL	NULL	NULL	NULL	NULL
Dr10882	GO:0048040|GO:0042732|GO:0005794|GO:0050662|GO:0005739|GO:0000166|GO:0005982|GO:0005985|GO:0009117	EC:4.1.1.35	udp-glucuronic acid decarboxylase 1	IPR001509|IPR016040	NAD-dependent epimerase/dehydratase|NAD(P)-binding domain	GO:0003824|GO:0044237|GO:0050662	NULL	NULL
Dr10902	GO:0005622|GO:0008270	NULL	dna rna-binding protein kin17	IPR019447	DNA/RNA-binding protein Kin17, conserved domain	NULL	NULL	NULL
Dr10862	GO:0050664|GO:0016021|GO:0022900|GO:0005509	EC:1.6.3.0	respiratory burst oxidase homolog protein h-like	IPR013130|IPR013112|IPR013121|IPR013623|IPR002048|IPR017938|IPR011992|IPR000778|IPR017927|IPR018247	Ferric reductase transmembrane component-like domain|FAD-binding 8|Ferric reductase, NAD binding|NADPH oxidase Respiratory burst|EF-hand domain|Cytochrome b245, heavy chain|Riboflavin synthase-like beta-barrel|EF-hand domain pair|Ferredoxin reductase-type FAD-binding domain|EF-Hand 1, calcium-binding site	GO:0016491|GO:0055114|GO:0004601|GO:0050664|GO:0005509|GO:0016020	EC:1.11.1.-	KEGG: 00480+1.11.1.-
Dr10896	GO:0016023|GO:0009505	NULL	osmotin-like protein	IPR001938	Thaumatin	NULL	NULL	NULL
Dr10931	GO:0016021|GO:0051258|GO:0072488|GO:0009737|GO:0080167|GO:0015843|GO:0015398|GO:0009624|GO:0005634|GO:0005886	NULL	ammonium transporter	IPR001905|IPR024041|IPR018047	Ammonium transporter|Ammonium transporter AmtB-like domain|Ammonium transporter, conserved site	GO:0008519|GO:0016020|GO:0072488|GO:0015696	NULL	NULL
Dr10982	NULL	NULL	NULL	IPR016024	Armadillo-type fold	GO:0005488	NULL	NULL
Dr10999	GO:0016020	NULL	uncharacterized protein	IPR006702	Uncharacterised protein family UPF0497, trans-membrane plant	NULL	NULL	NULL
Dr10946	GO:0042538|GO:0080052|GO:0042742|GO:0009624|GO:0042939|GO:0009753|GO:0042936|GO:0043201|GO:0009611|GO:0009751|GO:0009737|GO:0042937|GO:0016020|GO:0042938|GO:0080053	NULL	peptide transporter ptr3-a-like	IPR000109|IPR016196	Proton-dependent oligopeptide transporter family|Major facilitator superfamily domain, general substrate transporter	GO:0005215|GO:0006810|GO:0016020	NULL	Reactome: REACT_15518|Reactome: REACT_19419
Dr10966	NULL	NULL	NULL	IPR002885|IPR011990	Pentatricopeptide repeat|Tetratricopeptide-like helical	GO:0005515	NULL	NULL
Dr10968	NULL	NULL	NULL	IPR011047|IPR015943	Quinonprotein alcohol dehydrogenase-like superfamily|WD40/YVTN repeat-like-containing domain	GO:0005515	NULL	NULL
Dr10987	GO:0009941|GO:0010224|GO:0009926|GO:0005739	NULL	upf0420 protein c16orf58 homolog	IPR006968	Vitamin B6 photo-protection and homoeostasis	NULL	NULL	NULL
Dr11000	NULL	NULL	NULL	IPR007608	Senescence regulator S40	NULL	NULL	NULL
Dr11004	GO:0006979|GO:0008883|GO:0055114|GO:0009416|GO:0015995|GO:0006782|GO:0050661|GO:0009507	EC:1.2.1.70	glutamyl-trna reductase	IPR015896|IPR006151|IPR015895|IPR016040|IPR000343|IPR018214	Tetrapyrrole biosynthesis, glutamyl-tRNA reductase, dimerisation domain|Quinate/shikimate 5-dehydrogenase/glutamyl-tRNA reductase|Tetrapyrrole biosynthesis, glutamyl-tRNA reductase, N-terminal|NAD(P)-binding domain|Tetrapyrrole biosynthesis, glutamyl-tRNA reductase|Tetrapyrrole biosynthesis, glutamyl-tRNA reductase, conserved site	GO:0008883|GO:0033014|GO:0050661|GO:0055114	EC:1.2.1.70	KEGG: 00860+1.2.1.70|MetaCyc: PWY-5188|UniPathway: UPA00251
Dr11111	GO:0018279|GO:0005730|GO:0016021|GO:0009505|GO:0016023|GO:0009826|GO:0009664|GO:0005773|GO:0004579|GO:0005886|GO:0008250	EC:2.4.1.119	dolichyl-diphosphooligosaccharide--protein glycosyltransferase 48 kda subunit	IPR005013	Dolichyl-diphosphooligosaccharide--protein glycosyltransferase subunit WBP1	GO:0004579|GO:0005789|GO:0018279	EC:2.4.99.18	KEGG: 00510+2.4.99.18|KEGG: 00513+2.4.99.18|UniPathway: UPA00378
Dr11148	NULL	NULL	NULL	IPR002885|IPR008889|IPR011990	Pentatricopeptide repeat|VQ|Tetratricopeptide-like helical	GO:0005515	NULL	NULL
Dr11196	GO:0016740	NULL	c2 domain-containing protein	IPR000008|IPR013583	C2 domain|Phosphoribosyltransferase C-terminal	GO:0005515	NULL	NULL
Dr11209	GO:0009536	NULL	pentatricopeptide repeat-containing protein at5g03800-like	IPR002885|IPR011990	Pentatricopeptide repeat|Tetratricopeptide-like helical	GO:0005515	NULL	NULL
Dr11244	GO:0016772|GO:0016023|GO:0006796|GO:2000026|GO:0010073|GO:0005488	NULL	receptor-like kinase coryne	IPR000719|IPR011009	Protein kinase domain|Protein kinase-like domain	GO:0004672|GO:0005524|GO:0006468|GO:0016772	NULL	NULL
Dr11227	GO:0016779|GO:0005618|GO:0003746|GO:0008270|GO:0005739|GO:0050897|GO:0005524|GO:0006184|GO:0003924|GO:0046686|GO:0005525|GO:0005840|GO:0006448	EC:2.7.7.0	mitochondrial elongation factor tu	IPR000795|IPR004160|IPR004161|IPR009000|IPR009001|IPR027417|IPR005225|IPR004541	Elongation factor, GTP-binding domain|Translation elongation factor EFTu/EF1A, C-terminal|Translation elongation factor EFTu/EF1A, domain 2|Translation protein, beta-barrel domain|Translation elongation factor EF1A/initiation factor IF2gamma, C-terminal|P-loop containing nucleoside triphosphate hydrolase|Small GTP-binding protein domain|Translation elongation factor EFTu/EF1A, bacterial/organelle	GO:0003924|GO:0005525|GO:0003746|GO:0005622|GO:0006414	NULL	NULL
Dr11269	GO:0016023	NULL	uncharacterized protein	IPR021775	Protein of unknown function DUF3339	NULL	NULL	NULL
Dr11315	GO:0009536|GO:0016020	NULL	pentatricopeptide repeat-containing protein	IPR002885|IPR011990	Pentatricopeptide repeat|Tetratricopeptide-like helical	GO:0005515	NULL	NULL
Dr11349	GO:0003723|GO:0006364|GO:0008026|GO:0005524|GO:0000184|GO:0005634	NULL	dead-box atp-dependent rna helicase 30-like	IPR011545|IPR001650|IPR006813|IPR027417|IPR014001|IPR014014|IPR000629	DNA/RNA helicase, DEAD/DEAH box type, N-terminal|Helicase, C-terminal|Glycosyl transferase, family 17|P-loop containing nucleoside triphosphate hydrolase|Helicase, superfamily 1/2, ATP-binding domain|RNA helicase, DEAD-box type, Q motif|RNA helicase, ATP-dependent, DEAD-box, conserved site	GO:0003676|GO:0005524|GO:0008026|GO:0004386|GO:0003830|GO:0006487|GO:0016020	EC:2.4.1.144	KEGG: 00510+2.4.1.144|UniPathway: UPA00378
Dr11365	GO:0019204|GO:0005524|GO:0016740|GO:0017111	EC:3.6.1.15	uncharacterized protein loc100260782	IPR004948|IPR025486|IPR027417|IPR003593	Nucleoside-triphosphatase, THEP1 type|Domain of unknown function DUF4378|P-loop containing nucleoside triphosphate hydrolase|AAA+ ATPase domain	GO:0005524|GO:0016740|GO:0019204|GO:0000166|GO:0017111	EC:3.6.1.15	KEGG: 00230+3.6.1.15|KEGG: 00730+3.6.1.15|MetaCyc: PWY-6545|MetaCyc: PWY-7184|MetaCyc: PWY-7185|MetaCyc: PWY-7198|MetaCyc: PWY-7210
Dr11367	NULL	NULL	NULL	IPR008511	Protein BYPASS-related	NULL	NULL	NULL
Dr11363	GO:0003676|GO:0000166	NULL	heterogeneous nuclear	IPR012677|IPR000504	Nucleotide-binding, alpha-beta plait|RNA recognition motif domain	GO:0000166|GO:0003676	NULL	NULL
Dr11410	GO:0032509|GO:0000578|GO:0009793|GO:0040007|GO:0015031	NULL	charged multivesicular body protein 1b	IPR005024	Snf7	GO:0015031	NULL	NULL
Dr11575	GO:0030127|GO:0006886|GO:0006888|GO:0008270	NULL	protein transport protein sec23	IPR007123|IPR006895|IPR006896|IPR006900|IPR013094|IPR012990|IPR002035	Gelsolin domain|Zinc finger, Sec23/Sec24-type|Sec23/Sec24, trunk domain|Sec23/Sec24, helical domain|Alpha/beta hydrolase fold-3|Sec23/Sec24 beta-sandwich|von Willebrand factor, type A	GO:0006886|GO:0006888|GO:0008270|GO:0030127|GO:0008152|GO:0016787	NULL	Reactome: REACT_11123
Dr11594	GO:0044267	NULL	peptidyl-prolyl isomerase fkbp12	IPR023566|IPR001179	Peptidyl-prolyl cis-trans isomerase, FKBP-type|Peptidyl-prolyl cis-trans isomerase, FKBP-type, domain	GO:0006457	NULL	NULL
Dr11595	GO:0005310|GO:0006835|GO:0055085|GO:0006839|GO:0016021|GO:0031966	NULL	protein	IPR018108|IPR023395|IPR002067	Mitochondrial substrate/solute carrier|Mitochondrial carrier protein|Mitochondrial carrier domain	GO:0055085	NULL	NULL
Dr11568	GO:0052689	EC:3.1.1.0	gibberellin receptor	IPR013094|IPR002168	Alpha/beta hydrolase fold-3|Lipase, GDXG, active site	GO:0008152|GO:0016787	NULL	NULL
Dr11583	GO:0005488	NULL	uncharacterized protein	IPR006460	Protein of unknown function DUF617, plant	NULL	NULL	NULL
Dr11601	NULL	NULL	NULL	IPR002885|IPR011990	Pentatricopeptide repeat|Tetratricopeptide-like helical	GO:0005515	NULL	NULL
Dr11659	NULL	NULL	NULL	IPR006578	MADF domain	NULL	NULL	NULL
Dr11685	NULL	NULL	NULL	IPR019163	THO complex, subunit 5	NULL	NULL	NULL
Dr11620	GO:0005739	NULL	pentatricopeptide repeat-containing protein at5g27460-like	IPR002885|IPR011990	Pentatricopeptide repeat|Tetratricopeptide-like helical	GO:0005515	NULL	NULL
Dr11684	GO:0005643|GO:0046907|GO:0006950|GO:0009536	NULL	protein	IPR009269	Protein of unknown function DUF926	NULL	NULL	NULL
Dr11640	GO:0043169|GO:0019156|GO:0005983|GO:0009570|GO:0009569	EC:3.2.1.68	isoamylase chloroplastic-like	IPR015902|IPR006047|IPR004193|IPR017853|IPR014756|IPR013783|IPR013780|IPR013781|IPR006589|IPR011837	Glycoside hydrolase, family 13|Glycosyl hydrolase, family 13, catalytic domain|Glycoside hydrolase, family 13, N-terminal|Glycoside hydrolase, superfamily|Immunoglobulin E-set|Immunoglobulin-like fold|Glycosyl hydrolase, family 13, all-beta|Glycoside hydrolase, catalytic domain|Glycosyl hydrolase, family 13, subfamily, catalytic domain|Glycogen debranching enzyme, GlgX type	GO:0003824|GO:0005975|GO:0043169|GO:0004553|GO:0004133|GO:0005980	EC:3.2.1.-	KEGG: 00053+3.2.1.-|KEGG: 00130+3.2.1.-|KEGG: 00531+3.2.1.-|UniPathway: UPA00165
Dr01609	GO:0005524|GO:0003684|GO:0009536|GO:0006281	NULL	dna repair protein homolog	IPR027417|IPR020568|IPR014721|IPR004504|IPR003593	DNA repair protein RadA|P-loop containing nucleoside triphosphate hydrolase|Ribosomal protein S5 domain 2-type fold|Ribosomal protein S5 domain 2-type fold, subgroup|AAA+ ATPase domain	GO:0003684|GO:0005524|GO:0006281|GO:0000166|GO:0017111	NULL	NULL
Dr01616	GO:0016491|GO:0016023|GO:0008152	NULL	leucine-rich repeat receptor protein kinase exs	IPR001611|IPR013210	Leucine-rich repeat|Leucine-rich repeat-containing N-terminal, type 2	GO:0005515	NULL	NULL
Dr01625	GO:0044763|GO:0016043|GO:0044424	NULL	protein	IPR016024|IPR011989|IPR000225	Armadillo-type fold|Armadillo-like helical|Armadillo	GO:0005488|GO:0005515	NULL	NULL
Dr01686	NULL	NULL	NULL	IPR019258	Mediator complex, subunit Med4	GO:0001104|GO:0006357|GO:0016592	NULL	NULL
Dr01665	NULL	NULL	NULL	NULL	NULL	NULL	NULL	NULL
Dr01735	GO:0004553|GO:0016023|GO:0000272	EC:3.2.1.0	endoglucanase 5-like	IPR001701|IPR019028|IPR008928|IPR012341	Glycoside hydrolase, family 9|Carbohydrate binding domain CBM49|Six-hairpin glycosidase-like|Six-hairpin glycosidase	GO:0004553|GO:0005975|GO:0030246|GO:0003824	EC:3.2.1.4	KEGG: 00500+3.2.1.4|MetaCyc: PWY-6788|MetaCyc: PWY-6805
Dr01757	GO:0016023	NULL	uncharacterized protein	IPR019514|IPR019515	Protein of unknown function DUF2451, C-terminal|Vacuolar protein sorting-associated protein 54	NULL	NULL	NULL
Dr01786	GO:0005488	NULL	actin depolymerizing factor	IPR001878|IPR025836	Zinc finger, CCHC-type|Zinc knuckle CX2CX4HX4C	GO:0003676|GO:0008270	NULL	NULL
Dr01819	GO:0005737|GO:0000278|GO:0042023|GO:0003676|GO:0016301|GO:0016538|GO:0051726|GO:0005634|GO:0015074|GO:0051301|GO:0000074|GO:0045859	NULL	cyclin-dependent kinases regulatory subunit	IPR000789	Cyclin-dependent kinase, regulatory subunit	GO:0007049|GO:0016538	NULL	NULL
Dr01756	GO:0016020	NULL	uracil transporter-like protein	IPR001248	Permease, cytosine/purines, uracil, thiamine, allantoin	GO:0015205|GO:0015851|GO:0016020	NULL	NULL
Dr01843	GO:0009536	NULL	vacuolar protein sorting-associated protein 54-like	IPR012501|IPR019515	Vps54-like|Vacuolar protein sorting-associated protein 54	GO:0042147	NULL	NULL
Dr01916	NULL	NULL	NULL	IPR002885|IPR011990	Pentatricopeptide repeat|Tetratricopeptide-like helical	GO:0005515	NULL	NULL
Dr01885	NULL	NULL	NULL	IPR002885|IPR011990	Pentatricopeptide repeat|Tetratricopeptide-like helical	GO:0005515	NULL	NULL
Dr01908	NULL	NULL	NULL	IPR002885|IPR011990	Pentatricopeptide repeat|Tetratricopeptide-like helical	GO:0005515	NULL	NULL
Dr01915	GO:0016023|GO:0016740|GO:0044425|GO:0005783	NULL	dolichyl-diphosphooligosaccharide--protein glycosyltransferase subunit 2-like	IPR008814	Dolichyl-diphosphooligosaccharide--protein glycosyltransferase subunit Swp1	GO:0006487|GO:0008250|GO:0016021	EC:2.4.99.18	KEGG: 00510+2.4.99.18|KEGG: 00513+2.4.99.18|UniPathway: UPA00378
Dr11735	GO:0009306|GO:0009414|GO:0005739|GO:0006457|GO:0009651|GO:0010075|GO:0009409|GO:0016023|GO:0005524|GO:0005788|GO:0009934|GO:0051082|GO:0009507|GO:0005773|GO:0046686|GO:0005634|GO:0005886	NULL	endoplasmin-like protein	IPR001404|IPR015566|IPR020568|IPR003594|IPR020575	Heat shock protein Hsp90 family|Endoplasmin|Heat shock protein Hsp90, N-terminal|Ribosomal protein S5 domain 2-type fold|Histidine kinase-like ATPase, ATP-binding domain	GO:0005524|GO:0006457|GO:0006950|GO:0051082	NULL	NULL
Dr11755	GO:0016023	NULL	serine protease kazal-type family protein	IPR002350	Kazal domain	GO:0005515	NULL	NULL
Dr11704	NULL	NULL	NULL	IPR002885|IPR011990	Pentatricopeptide repeat|Tetratricopeptide-like helical	GO:0005515	NULL	NULL
Dr11765	GO:0016740	NULL	pentatricopeptide repeat-containing protein	IPR002885|IPR011990	Pentatricopeptide repeat|Tetratricopeptide-like helical	GO:0005515	NULL	NULL
Dr11772	GO:0032259|GO:0008168	EC:2.1.1.0	protein	IPR004159	Putative S-adenosyl-L-methionine-dependent methyltransferase	GO:0008168	EC:2.1.1.-	KEGG: 00130+2.1.1.-|KEGG: 00253+2.1.1.-|KEGG: 00270+2.1.1.-|KEGG: 00340+2.1.1.-|KEGG: 00350+2.1.1.-|KEGG: 00360+2.1.1.-|KEGG: 00380+2.1.1.-|KEGG: 00450+2.1.1.-|KEGG: 00522+2.1.1.-|KEGG: 00624+2.1.1.-|KEGG: 00627+2.1.1.-|KEGG: 00860+2.1.1.-|KEGG: 00940+2.1.1.-|KEGG: 00941+2.1.1.-|KEGG: 00942+2.1.1.-|KEGG: 00945+2.1.1.-|KEGG: 00950+2.1.1.-|KEGG: 00981+2.1.1.-
Dr11786	GO:0009941|GO:0044237|GO:0010020|GO:0050662|GO:0003824|GO:0005739|GO:0051301|GO:0000166	NULL	rossmann-fold nad -binding domain-containing protein	IPR010099|IPR013549|IPR016040	Sugar nucleotide epimerase YfcH,-like putative|Domain of unknown function DUF1731, C-terminal|NAD(P)-binding domain	NULL	NULL	NULL
Dr11825	GO:0019031|GO:0005525|GO:0006184|GO:0006886|GO:0009707|GO:0015450|GO:0042803|GO:0003924	NULL	translocase of chloroplast 34	IPR006703|IPR027417|IPR005688	AIG1|P-loop containing nucleoside triphosphate hydrolase|Chloroplast protein import component Toc34	GO:0005525|GO:0006886|GO:0009707|GO:0015450	NULL	NULL
Dr11865	NULL	NULL	NULL	IPR005513	Late embryogenesis abundant protein, LEA-25/LEA-D113	GO:0009790	NULL	NULL
Dr11873	NULL	NULL	NULL	IPR022709	Protein of unknown function DUF3550/UPF0682	NULL	NULL	NULL
Dr11876	GO:0052726|GO:0047325|GO:0016310|GO:0005524|GO:0000287|GO:0052725|GO:0032957|GO:0005739	EC:2.7.1.134	inositol phosphate kinase	IPR008656|IPR017427|IPR011761	Inositol-tetrakisphosphate 1-kinase|Inositol-tetrakisphosphate 1-kinase, plant|ATP-grasp fold	GO:0000287|GO:0005524|GO:0005622|GO:0032957|GO:0047325|GO:0052725|GO:0052726|GO:0046872	EC:2.7.1.134+2.7.1.159	KEGG: 00562+2.7.1.134+2.7.1.159|MetaCyc: PWY-4661|MetaCyc: PWY-6362|MetaCyc: PWY-6365|MetaCyc: PWY-6366|MetaCyc: PWY-6554
Dr11910	NULL	NULL	NULL	IPR005134	Uncharacterised protein family UPF0114	NULL	NULL	NULL
Dr11812	GO:0005739	NULL	pentatricopeptide repeat-containing protein	IPR002885|IPR011990	Pentatricopeptide repeat|Tetratricopeptide-like helical	GO:0005515	NULL	NULL
Dr11843	NULL	NULL	NULL	IPR013105|IPR019734|IPR011990|IPR013026	Tetratricopeptide TPR2|Tetratricopeptide repeat|Tetratricopeptide-like helical|Tetratricopeptide repeat-containing domain	GO:0005515	NULL	NULL
Dr11884	GO:0003824	NULL	acetyl-coenzyme a synthetase	IPR000873|IPR025110|IPR009081|IPR011047|IPR027295|IPR018391|IPR006162|IPR020845	AMP-dependent synthetase/ligase|AMP-binding enzyme C-terminal domain|Acyl carrier protein-like|Quinonprotein alcohol dehydrogenase-like superfamily|Quinonprotein alcohol dehydrogenase-like domain|Pyrrolo-quinoline quinone beta-propeller repeat|Phosphopantetheine attachment site|AMP-binding, conserved site	GO:0003824|GO:0008152	NULL	UniPathway: UPA00094
Dr11935	GO:0005739	NULL	copper ion binding protein	NULL	NULL	NULL	NULL	NULL
Dr11943	GO:0009579|GO:0044425|GO:0009536	NULL	photosystem i p700 chlorophyll a apoprotein	IPR001763|IPR020936	Rhodanese-like domain|Uncharacterised protein family UPF0176	NULL	NULL	NULL
Dr11951	GO:0006468|GO:0004674|GO:0051704|GO:0016023|GO:0071944|GO:0005524|GO:0032501|GO:0016020|GO:0009069	EC:2.7.11.0	feronia receptor-like kinase	IPR001245|IPR024788|IPR011009|IPR013320|IPR002290|IPR000719|IPR017441|IPR008271	Serine-threonine/tyrosine-protein kinase catalytic domain|Malectin-like carbohydrate-binding domain|Protein kinase-like domain|Concanavalin A-like lectin/glucanase, subgroup|Serine/threonine- / dual specificity protein kinase, catalytic domain|Protein kinase domain|Protein kinase, ATP binding site|Serine/threonine-protein kinase, active site	GO:0004672|GO:0006468|GO:0016772|GO:0005524|GO:0004674	NULL	NULL
Dr11982	NULL	NULL	NULL	IPR002885|IPR011990	Pentatricopeptide repeat|Tetratricopeptide-like helical	GO:0005515	NULL	NULL
Dr12012	GO:0016020|GO:0016023	NULL	presenilin-like protein at1g08700-like	IPR001108|IPR006639	Peptidase A22A, presenilin|Presenilin/signal peptide peptidase	GO:0004190|GO:0016021	NULL	Reactome: REACT_11061|Reactome: REACT_299
Dr12035	GO:0005488|GO:0007049|GO:0050794|GO:0044424	NULL	la-related protein	IPR006671|IPR004367|IPR006630|IPR013763|IPR011991|IPR006607	Cyclin, N-terminal|Cyclin, C-terminal domain|RNA-binding protein Lupus La|Cyclin-like|Winged helix-turn-helix DNA-binding domain|Protein of unknown function DM15	GO:0005634	NULL	NULL
Dr11932	GO:0046688|GO:0005507|GO:0016023|GO:0052716|GO:0048046|GO:0046274|GO:0055114	NULL	phagocyte signaling-impaired	IPR001117|IPR011706|IPR011707|IPR019183|IPR008972|IPR011990|IPR017761|IPR002355	Multicopper oxidase, type 1|Multicopper oxidase, type 2|Multicopper oxidase, type 3|N-acetyltransferase B complex, non-catalytic subunit|Cupredoxin|Tetratricopeptide-like helical|Laccase|Multicopper oxidase, copper-binding site	GO:0016491|GO:0055114|GO:0005507|GO:0005515|GO:0046274|GO:0048046|GO:0052716	NULL	NULL
Dr11961	GO:0016020	NULL	auxin efflux carrier family protein	IPR004776	Auxin efflux carrier	GO:0016021|GO:0055085	NULL	NULL
Dr12038	GO:0005739	NULL	uncharacterized protein	NULL	NULL	NULL	NULL	NULL
Dr12061	GO:0016706|GO:0043167	EC:1.14.11.0	uncharacterized pkhd-type hydroxylase at1g22950-like	IPR006620	Prolyl 4-hydroxylase, alpha subunit	GO:0005506|GO:0016705|GO:0031418|GO:0055114	NULL	NULL
Dr12072	GO:0006810	NULL	ap-3 complex subunit delta	IPR002553|IPR016024|IPR011989	Clathrin/coatomer adaptor, adaptin-like, N-terminal|Armadillo-type fold|Armadillo-like helical	GO:0006886|GO:0016192|GO:0030117|GO:0005488	NULL	NULL
Dr12109	NULL	NULL	NULL	IPR002885	Pentatricopeptide repeat	NULL	NULL	NULL
Dr12183	NULL	NULL	NULL	IPR001251|IPR011074	CRAL-TRIO domain|CRAL/TRIO, N-terminal domain	NULL	NULL	NULL
Dr12185	GO:0003677|GO:0008270|GO:0006355	NULL	dof zinc finger protein	IPR003851	Zinc finger, Dof-type	GO:0003677|GO:0006355	NULL	NULL
Dr12207	GO:0005730	NULL	protein sec13 homolog	IPR001680|IPR017986|IPR015943|IPR020472	WD40 repeat|G-protein beta WD-40 repeat|WD40-repeat-containing domain|WD40/YVTN repeat-like-containing domain	GO:0005515	NULL	NULL
Dr12179	GO:0009644|GO:0005524|GO:0042542|GO:0032440|GO:0009408|GO:0055114	EC:1.3.1.74	heat shock 70 kda protein	IPR013126	Heat shock protein 70 family	NULL	NULL	NULL
Dr12234	GO:0006355|GO:0046983|GO:0003830|GO:0009734|GO:0016020|GO:0005634|GO:0006487	EC:2.4.1.144	beta- -n-acetylglucosaminyltransferase-like protein	IPR006813	Glycosyl transferase, family 17	GO:0003830|GO:0006487|GO:0016020	EC:2.4.1.144	KEGG: 00510+2.4.1.144|UniPathway: UPA00378
Dr12247	NULL	NULL	NULL	IPR015424|IPR015421	Pyridoxal phosphate-dependent transferase|Pyridoxal phosphate-dependent transferase, major region, subdomain 1	GO:0003824|GO:0030170	NULL	NULL
Dr12257	GO:0006468|GO:0005524|GO:0004674|GO:0009069	EC:2.7.11.0	calcium-dependent protein	IPR000719|IPR011009|IPR002290|IPR017441|IPR008271	Protein kinase domain|Protein kinase-like domain|Serine/threonine- / dual specificity protein kinase, catalytic domain|Protein kinase, ATP binding site|Serine/threonine-protein kinase, active site	GO:0004672|GO:0005524|GO:0006468|GO:0016772|GO:0004674	NULL	NULL
Dr12343	GO:0019898|GO:0005509|GO:0009507|GO:0015979|GO:0009654	NULL	protein	IPR016123	Mog1/PsbP, alpha/beta/alpha sandwich	NULL	NULL	NULL
Dr12317	GO:0016020|GO:0009941|GO:0000166|GO:0051744	NULL	pale-green and chlorophyll b reduced 2	IPR016040	NAD(P)-binding domain	NULL	NULL	NULL
Dr12276	GO:0000461|GO:0003735|GO:0006414|GO:0022627|GO:0016023|GO:0000447	NULL	40s ribosomal protein	IPR001931|IPR018279	Ribosomal protein S21e|Ribosomal protein S21e, conserved site	GO:0003735|GO:0005622|GO:0005840|GO:0006412	NULL	NULL
Dr12292	GO:0043565|GO:0005634|GO:0046982|GO:0006355	NULL	nuclear transcription factor y subunit b-5-like	IPR003958|IPR009072|IPR003957	Transcription factor CBF/NF-Y/archaeal histone|Transcription factor, NFYB/HAP3 subunit|Histone-fold	GO:0005622|GO:0043565|GO:0046982|GO:0003677	NULL	NULL
Dr12315	GO:0008168|GO:0032259	EC:2.1.1.0	s-adenosylmethionine-dependent methyltransferase domain-containing protein	NULL	NULL	NULL	NULL	NULL
Dr12377	GO:0003743|GO:0006367|GO:0005673|GO:0005840|GO:0006446	NULL	general transcription factor iie subunit	IPR016656	Transcription initiation factor TFIIE, beta subunit	GO:0005673|GO:0006367	NULL	NULL
Dr12406	GO:0005829|GO:0009343|GO:0003989|GO:0006633|GO:0046872|GO:2001295|GO:0005524|GO:0004075|GO:0006090	EC:6.4.1.2|EC:6.3.4.14	acetyl- carboxylase	IPR005481|IPR000089|IPR000022|IPR005482|IPR005479|IPR013537|IPR011053|IPR011054|IPR016185|IPR013815|IPR013816|IPR011761|IPR011764|IPR011762|IPR011763	Carbamoyl-phosphate synthase, large subunit, N-terminal|Biotin/lipoyl attachment|Carboxyl transferase|Biotin carboxylase, C-terminal|Carbamoyl-phosphate synthetase large subunit-like, ATP-binding domain|Acetyl-CoA carboxylase, central domain|Single hybrid motif|Rudiment single hybrid motif|Pre-ATP-grasp domain|ATP-grasp fold, subdomain 1|ATP-grasp fold, subdomain 2|ATP-grasp fold|Biotin carboxyla…	GO:0003824|GO:0008152|GO:0016874|GO:0005524|GO:0003989|GO:0006633|GO:0046872|GO:0004075	EC:6.4.1.2|EC:6.4.1.2+6.3.4.14	KEGG: 00061+6.4.1.2|KEGG: 00253+6.4.1.2|KEGG: 00620+6.4.1.2|KEGG: 00640+6.4.1.2|KEGG: 00720+6.4.1.2|MetaCyc: PWY-4381|MetaCyc: PWY-5743|MetaCyc: PWY-5744|MetaCyc: PWY-5789|MetaCyc: PWY-6679|UniPathway: UPA00655|KEGG: 00061+6.4.1.2+6.3.4.14|KEGG: 00253+6.4.1.2|KEGG: 00620+6.4.1.2|KEGG: 00640+6.4.1.2|KEGG: 00720+6.4.1.2|MetaCyc: PWY-4381|MetaCyc: PWY-5743|MetaCyc: PWY-5744|MetaCyc: PWY-5789|MetaCyc…
Dr12436	GO:0005739	NULL	pentatricopeptide repeat-containing protein	IPR002885|IPR011990	Pentatricopeptide repeat|Tetratricopeptide-like helical	GO:0005515	NULL	NULL
Dr12437	GO:0031425|GO:0009507	NULL	pentatricopeptide repeat-containing protein	IPR002885|IPR011990	Pentatricopeptide repeat|Tetratricopeptide-like helical	GO:0005515	NULL	NULL
Dr12374	GO:0009536|GO:0016020	NULL	pentatricopeptide repeat-containing protein at1g09900-like	IPR002885|IPR011990	Pentatricopeptide repeat|Tetratricopeptide-like helical	GO:0005515	NULL	NULL
Dr12413	GO:0005840|GO:0003735|GO:0006412|GO:0042254	NULL	50s ribosomal protein l7	IPR015608|IPR013823|IPR014719|IPR000206	Putative ribosomal protein L7/L12, plants|Ribosomal protein L7/L12, C-terminal|Ribosomal protein L7/L12, C-terminal/adaptor protein ClpS-like|Ribosomal protein L7/L12	GO:0003735|GO:0005622|GO:0005840|GO:0006412	NULL	NULL
Dr12421	GO:0044710|GO:0005739|GO:0009507|GO:0003824	NULL	fad nad -binding oxidoreductase domain-containing protein	IPR002937	Amine oxidase	GO:0016491|GO:0055114	NULL	NULL
Dr12462	GO:0097159|GO:1901363	NULL	nucleolysin tiar-like	IPR000504|IPR012677	RNA recognition motif domain|Nucleotide-binding, alpha-beta plait	GO:0003676|GO:0000166	NULL	NULL
Dr12482	GO:0004008|GO:0016021|GO:0046872|GO:0005524|GO:0009535|GO:0060003	EC:3.6.3.4	p-type atpase	IPR008250|IPR006121|IPR023214|IPR023299|IPR001757|IPR027256|IPR018303	P-type ATPase, A domain|Heavy metal-associated domain, HMA|HAD-like domain|Cation-transporting P-type ATPase|P-type ATPase, cytoplasmic domain N|Cation-transporting P-type ATPase, subfamily IB|P-type ATPase, phosphorylation site	GO:0000166|GO:0046872|GO:0030001|GO:0006812|GO:0016021|GO:0019829	NULL	NULL
Dr12507	NULL	NULL	NULL	IPR002885	Pentatricopeptide repeat	NULL	NULL	NULL
Dr12556	GO:0016787	NULL	aspartic proteinase nepenthesin-1-like	IPR001461|IPR021109|IPR001969	Aspartic peptidase|Aspartic peptidase domain|Aspartic peptidase, active site	GO:0004190|GO:0006508	NULL	NULL
Dr12591	GO:0016787|GO:0009536|GO:0046685	NULL	metallo-beta-lactamase family protein	IPR001279	Beta-lactamase-like	GO:0016787	NULL	NULL
Dr12603	NULL	NULL	NULL	IPR002885|IPR011990	Pentatricopeptide repeat|Tetratricopeptide-like helical	GO:0005515	NULL	NULL
Dr12529	GO:0000439|GO:0016023|GO:0004003|GO:0006289|GO:0005657	NULL	transcription initiation factor tfiih subunit h4	IPR004598	Transcription factor TFIIH subunit p52/Tfb2	GO:0000439|GO:0004003|GO:0005634|GO:0006289	NULL	NULL
Dr12667	GO:0005856|GO:0006909	NULL	elmo domain-containing protein a-like	IPR006816	Engulfment/cell motility, ELMO	GO:0005856|GO:0006909	NULL	NULL
Dr12672	NULL	NULL	NULL	IPR002885|IPR011990	Pentatricopeptide repeat|Tetratricopeptide-like helical	GO:0005515	NULL	NULL
Dr02008	GO:0050896|GO:0005739	NULL	pentatricopeptide repeat-containing protein	IPR002885|IPR011990	Pentatricopeptide repeat|Tetratricopeptide-like helical	GO:0005515	NULL	NULL
Dr02043	GO:0016020|GO:0006810	NULL	vesicle-associated membrane protein 724	IPR001388|IPR010908|IPR011012	Synaptobrevin|Longin domain|Longin-like domain	GO:0016021|GO:0016192|GO:0006810	NULL	NULL
Dr02052	GO:0005739	NULL	pentatricopeptide repeat-containing protein mitochondrial-like	IPR002885|IPR011990	Pentatricopeptide repeat|Tetratricopeptide-like helical	GO:0005515	NULL	NULL
Dr01996	GO:0044763|GO:0032555|GO:0035639|GO:0032550	NULL	xpa-binding protein 1	IPR004130|IPR027417	Uncharacterised protein family, ATP binding|P-loop containing nucleoside triphosphate hydrolase	GO:0000166	NULL	NULL
Dr02075	GO:0046872|GO:0044267	NULL	f-box protein skip5	IPR011050|IPR001810|IPR012334	Pectin lyase fold/virulence factor|F-box domain|Pectin lyase fold	GO:0005515	NULL	NULL
Dr02093	GO:0016020|GO:0009536	NULL	nuclear control of atpase protein	IPR013946	Nuclear control of ATP synthase 2	NULL	NULL	NULL
Dr02078	GO:0006424|GO:0005739|GO:0048481|GO:0005524|GO:0000049|GO:0009507|GO:0004818|GO:0009332|GO:0015994	EC:6.1.1.17	glutamyl-trna synthetase	IPR000924|IPR020058|IPR008925|IPR020751|IPR020061|IPR014729|IPR004527|IPR001412	Glutamyl/glutaminyl-tRNA synthetase|Glutamyl/glutaminyl-tRNA synthetase, class Ib, catalytic domain|Aminoacyl-tRNA synthetase, class I, anticodon-binding|Aminoacyl-tRNA synthetase, class I, anticodon-binding domain, subdomain 2|Glutamyl/glutaminyl-tRNA synthetase, class Ib, alpha-bundle domain|Rossmann-like alpha/beta/alpha sandwich fold|Glutamate-tRNA ligase, bacterial/mitochondrial|Aminoacyl-tR…	GO:0000166|GO:0005524|GO:0005737|GO:0016876|GO:0043039|GO:0000049|GO:0004812|GO:0006418|GO:0004818|GO:0006424	EC:6.1.1.17	Reactome: REACT_71|KEGG: 00860+6.1.1.17|KEGG: 00970+6.1.1.17|MetaCyc: PWY-5188|KEGG: 00860+6.1.1.17|KEGG: 00970+6.1.1.17|MetaCyc: PWY-5188|Reactome: REACT_71
Dr02126	NULL	NULL	NULL	IPR007146|IPR018972	Sas10/Utp3/C1D|Sas10 C-terminal domain	NULL	NULL	NULL
Dr02168	GO:0046872	NULL	calcium-binding ef hand family protein	IPR013105|IPR011992|IPR011990|IPR019734|IPR002048|IPR013026	Tetratricopeptide TPR2|EF-hand domain pair|Tetratricopeptide-like helical|Tetratricopeptide repeat|EF-hand domain|Tetratricopeptide repeat-containing domain	GO:0005509|GO:0005515	NULL	NULL
Dr02211	NULL	NULL	NULL	IPR001810|IPR015916	F-box domain|Galactose oxidase, beta-propeller	GO:0005515	NULL	NULL
Dr02234	GO:0005739|GO:0016020	NULL	pentatricopeptide repeat-containing protein	IPR002885	Pentatricopeptide repeat	NULL	NULL	NULL
Dr02258	GO:0005488	NULL	pentatricopeptide repeat-containing protein	IPR002885|IPR011990	Pentatricopeptide repeat|Tetratricopeptide-like helical	GO:0005515	NULL	NULL
Dr02277	GO:0006468|GO:0005524|GO:0004674|GO:0009069	EC:2.7.11.0	probable lrr receptor-like serine threonine-protein kinase rkf3-like	IPR000719|IPR011009|IPR013320|IPR002290|IPR017441|IPR008271	Protein kinase domain|Protein kinase-like domain|Concanavalin A-like lectin/glucanase, subgroup|Serine/threonine- / dual specificity protein kinase, catalytic domain|Protein kinase, ATP binding site|Serine/threonine-protein kinase, active site	GO:0004672|GO:0005524|GO:0006468|GO:0016772|GO:0004674	NULL	NULL
Dr02311	GO:0046872	NULL	e3 ubiquitin-protein ligase ring1-like	IPR001841|IPR013083	Zinc finger, RING-type|Zinc finger, RING/FYVE/PHD-type	GO:0005515|GO:0008270	NULL	NULL
Dr02317	GO:0009536	NULL	u3 small nucleolar rna-associated protein	IPR001680|IPR018983|IPR017986|IPR015943|IPR020472	WD40 repeat|U3 small nucleolar RNA-associated protein 15, C-terminal|G-protein beta WD-40 repeat|WD40-repeat-containing domain|WD40/YVTN repeat-like-containing domain	GO:0005515|GO:0005730|GO:0006364	NULL	NULL
Dr02340	GO:0048364|GO:0009941|GO:0006777|GO:0006879|GO:0005743|GO:0016021|GO:0008559|GO:0050790|GO:0009555|GO:0009658|GO:0046686|GO:0010288|GO:0006200|GO:0040014|GO:0005524|GO:0010380|GO:0006855	EC:3.6.3.44	abc transporter b family member mitochondrial-like	IPR003439|IPR001140|IPR004776|IPR027417|IPR011527|IPR003593|IPR017871	ABC transporter-like|ABC transporter, transmembrane domain|Auxin efflux carrier|P-loop containing nucleoside triphosphate hydrolase|ABC transporter type 1, transmembrane domain|AAA+ ATPase domain|ABC transporter, conserved site	GO:0005524|GO:0016887|GO:0006810|GO:0016021|GO:0042626|GO:0055085|GO:0000166|GO:0017111	NULL	NULL
Dr02370	GO:0043234|GO:0015630|GO:0044763|GO:0009536|GO:0000166|GO:0044430	NULL	kinesin-like protein kif22-like	IPR027640|IPR001752|IPR010994|IPR027417	Kinesin-like protein|Kinesin, motor domain|RuvA domain 2-like|P-loop containing nucleoside triphosphate hydrolase	GO:0003777|GO:0005871|GO:0007018|GO:0005524|GO:0008017	NULL	Reactome: REACT_216
Dr02372	GO:0016023|GO:0009536|GO:0016757	NULL	dolichyl-phosphate beta-glucosyltransferase	IPR001173	Glycosyl transferase, family 2	NULL	NULL	NULL
Dr02394	GO:0009089|GO:0008837|GO:0009507	EC:5.1.1.7	diaminopimelate epimerase	IPR001653|IPR018510	Diaminopimelate epimerase, DapF|Diaminopimelate epimerase, active site	GO:0008837|GO:0009089|GO:0005737	EC:5.1.1.7	KEGG: 00300+5.1.1.7|MetaCyc: PWY-2941|MetaCyc: PWY-5097|UniPathway: UPA00034
Dr02458	GO:0016020	NULL	plac8 family protein	IPR006461|IPR021369	Uncharacterised protein family Cys-rich|Protein of unknown function DUF2985	NULL	NULL	NULL
Dr02389	GO:0009536	NULL	pentatricopeptide repeat-containing protein	IPR002885|IPR011990	Pentatricopeptide repeat|Tetratricopeptide-like helical	GO:0005515	NULL	NULL
Dr02384	NULL	NULL	NULL	IPR001251	CRAL-TRIO domain	NULL	NULL	NULL
Dr02385	GO:0017168|GO:0006751	EC:3.5.2.9	oxoprolinase family protein	IPR002821|IPR003692|IPR008040	Hydantoinase/oxoprolinase|Hydantoinase B/oxoprolinase|Hydantoinaseoxoprolinase, N-terminal	GO:0016787|GO:0003824	NULL	NULL
Dr12800	GO:0032313|GO:0044444	NULL	run and tbc1 domain containing	IPR000195	Rab-GTPase-TBC domain	GO:0005097|GO:0032313	NULL	NULL
Dr12823	GO:0016023|GO:0005773|GO:0004185|GO:0006508	EC:3.4.16.0	serine carboxypeptidase-like protein	IPR001563|IPR018202	Peptidase S10, serine carboxypeptidase|Peptidase S10, serine carboxypeptidase, active site	GO:0004185|GO:0006508	NULL	NULL
Dr12824	GO:0009536|GO:0016020	NULL	protein yipf5	IPR006977	Yip1 domain	GO:0016020	NULL	NULL
Dr12833	GO:0005488	NULL	zinc finger ccch domain-containing protein 66-like isoform 1	IPR000571|IPR020683|IPR002110	Zinc finger, CCCH-type|Ankyrin repeat-containing domain|Ankyrin repeat	GO:0046872|GO:0005515	NULL	NULL
Dr12836	GO:0046873|GO:0009705|GO:0005886|GO:0010312|GO:0006829|GO:0055085|GO:0010299|GO:0032440|GO:0016021|GO:0055114	EC:1.3.1.74	metal tolerance protein 1-like	IPR002524|IPR027469	Cation efflux protein|Cation efflux protein transmembrane domain	GO:0006812|GO:0008324|GO:0016021|GO:0055085	NULL	NULL
Dr12688	GO:0005773|GO:0010345|GO:0009055|GO:0005506|GO:0020037|GO:0006631|GO:0018685|GO:0070330|GO:0055114|GO:0006118	EC:1.14.15.3|EC:1.14.14.1	cytochrome p450	IPR001128|IPR002401|IPR017972	Cytochrome P450|Cytochrome P450, E-class, group I|Cytochrome P450, conserved site	GO:0005506|GO:0016705|GO:0020037|GO:0055114	NULL	Reactome: REACT_13433
Dr12689	GO:0016746	NULL	protein	IPR003480|IPR023213	Transferase|Chloramphenicol acetyltransferase-like domain	GO:0016747	NULL	NULL
Dr12690	GO:0005840|GO:0009532|GO:0044434|GO:0009579|GO:0016020	NULL	50s ribosomal protein l4	IPR013005|IPR002136|IPR023574	Ribosomal protein L4/L1e, bacterial-type|Ribosomal protein L4/L1e|Ribosomal protein L4 domain	GO:0003735|GO:0005840|GO:0006412	NULL	NULL
Dr12782	GO:0044763|GO:0004672|GO:0005739|GO:0016023|GO:0000166|GO:0016310|GO:0032502	NULL	receptor-like protein kinase herk 1-like	IPR001245|IPR024788|IPR011009|IPR013320|IPR002290|IPR000719|IPR017441|IPR008271	Serine-threonine/tyrosine-protein kinase catalytic domain|Malectin-like carbohydrate-binding domain|Protein kinase-like domain|Concanavalin A-like lectin/glucanase, subgroup|Serine/threonine- / dual specificity protein kinase, catalytic domain|Protein kinase domain|Protein kinase, ATP binding site|Serine/threonine-protein kinase, active site	GO:0004672|GO:0006468|GO:0016772|GO:0005524|GO:0004674	NULL	NULL
Dr12909	NULL	NULL	NULL	NULL	NULL	NULL	NULL	NULL
Dr12962	GO:0005739	NULL	pentatricopeptide repeat-containing protein	IPR002885	Pentatricopeptide repeat	NULL	NULL	NULL
Dr12925	GO:0016301|GO:0008152	NULL	probably inactive leucine-rich repeat receptor-like protein kinase	IPR000719|IPR001611|IPR013210|IPR011009|IPR003591|IPR017441	Protein kinase domain|Leucine-rich repeat|Leucine-rich repeat-containing N-terminal, type 2|Protein kinase-like domain|Leucine-rich repeat, typical subtype|Protein kinase, ATP binding site	GO:0004672|GO:0005524|GO:0006468|GO:0005515|GO:0016772	NULL	NULL
Dr12929	NULL	NULL	NULL	NULL	NULL	NULL	NULL	NULL
Dr12971	GO:0016168|GO:0016021|GO:0009773|GO:0009941|GO:0050821|GO:0042550|GO:0030093|GO:0009780	NULL	photosystem i reaction center subunit v	IPR000549|IPR023618|IPR017494|IPR016370	Photosystem I PsaG/PsaK protein|Photosystem I PsaG/PsaK domain|Photosystem I PsaG, plant|Photosystem I PsaG/PsaK, plant	GO:0009522|GO:0015979|GO:0016020|GO:0016168	NULL	NULL
Dr13004	NULL	NULL	NULL	IPR013951|IPR004043	Histone deacetylation protein Rxt3|LCCL domain	NULL	NULL	NULL
Dr13019	NULL	NULL	NULL	IPR004864	Late embryogenesis abundant protein, LEA-14	NULL	NULL	NULL
Dr13031	GO:0016772	NULL	receptor-like serine threonine-protein kinase at2g45590-like	IPR000719|IPR011009|IPR013320|IPR002290|IPR008271	Protein kinase domain|Protein kinase-like domain|Concanavalin A-like lectin/glucanase, subgroup|Serine/threonine- / dual specificity protein kinase, catalytic domain|Serine/threonine-protein kinase, active site	GO:0004672|GO:0005524|GO:0006468|GO:0016772|GO:0004674	NULL	NULL
Dr13039	GO:0015450|GO:0016021|GO:0009941|GO:0042538|GO:0045038|GO:0010027|GO:0090342|GO:0009535|GO:0051205	NULL	inner membrane protein	IPR001708	Membrane insertase OXA1/ALB3/YidC	GO:0016021|GO:0051205	NULL	NULL
Dr13041	NULL	NULL	NULL	IPR002068	Alpha crystallin/Hsp20 domain	NULL	NULL	NULL
Dr13067	NULL	NULL	NULL	IPR017923	Transcription factor IIS, N-terminal	GO:0003677|GO:0005634|GO:0006351	NULL	NULL
Dr13100	NULL	NULL	NULL	IPR002836	PDCD5-related protein	GO:0003677	NULL	NULL
Dr13115	GO:0016740	NULL	pap-associated domain-containing protein 5-like	IPR002058	PAP/25A-associated	NULL	NULL	NULL
Dr13141	GO:0006412|GO:0005739|GO:0042586|GO:0008463|GO:0003677|GO:0005524|GO:0004386|GO:0009570|GO:0005506|GO:0006555|GO:0046487	EC:3.5.1.88|EC:3.5.1.31	peptide deformylase 1b	IPR000181|IPR023635	Formylmethionine deformylase|Peptide deformylase	GO:0005506|GO:0042586	NULL	NULL
Dr13159	GO:0016788|GO:0005739	NULL	hydroxyacylglutathione hydrolase mitochondrial-like	IPR001279	Beta-lactamase-like	GO:0016787	NULL	NULL
Dr13160	GO:0016787|GO:0004300|GO:0080167|GO:0006550|GO:0006552|GO:0006554|GO:0006568|GO:0006574|GO:0006633|GO:0018874|GO:0019482|GO:0046251	EC:4.2.1.17	protein	NULL	NULL	NULL	NULL	NULL
Dr13194	GO:0055085|GO:0016021	NULL	auxin efflux carrier family protein	IPR004776	Auxin efflux carrier	GO:0016021|GO:0055085	NULL	NULL
Dr13209	GO:0003333|GO:0015189|GO:0015808|GO:0015181|GO:0015180|GO:0016021|GO:0015819|GO:0015813|GO:0005313|GO:0015809	NULL	uncharacterized amino-acid permease -like	IPR002293|IPR022617|IPR004840	Amino acid/polyamine transporter I|Rad60/SUMO-like domain|Amino acid permease, conserved site	GO:0003333|GO:0015171|GO:0016020|GO:0006865|GO:0016021|GO:0055085	NULL	NULL
Dr13218	NULL	NULL	NULL	NULL	NULL	NULL	NULL	NULL
Dr13353	GO:0016023|GO:0071944	NULL	protein tolb	IPR011659|IPR015943	WD40-like Beta Propeller|WD40/YVTN repeat-like-containing domain	GO:0005515	NULL	NULL
Dr13265	GO:0009799|GO:0005654|GO:0005515|GO:0009944|GO:0048441|GO:0009954|GO:0009536	NULL	lob domain-containing protein 6	IPR004883	Lateral organ boundaries, LOB	NULL	NULL	NULL
Dr13270	GO:0009507	NULL	uncharacterized protein	NULL	NULL	NULL	NULL	NULL
Dr13293	NULL	NULL	NULL	IPR002885|IPR011990	Pentatricopeptide repeat|Tetratricopeptide-like helical	GO:0005515	NULL	NULL
Dr13349	GO:0016301|GO:0016023	NULL	probable receptor-like protein kinase at1g11050-like	IPR000719|IPR011009|IPR013320|IPR002290|IPR017441|IPR008271	Protein kinase domain|Protein kinase-like domain|Concanavalin A-like lectin/glucanase, subgroup|Serine/threonine- / dual specificity protein kinase, catalytic domain|Protein kinase, ATP binding site|Serine/threonine-protein kinase, active site	GO:0004672|GO:0005524|GO:0006468|GO:0016772|GO:0004674	NULL	NULL
Dr13357	NULL	NULL	NULL	IPR001810	F-box domain	GO:0005515	NULL	NULL
Dr13367	GO:0004553|GO:0044699|GO:0009987|GO:0005975	EC:3.2.1.0	protein	IPR001944|IPR000922|IPR008979|IPR017853|IPR013781|IPR019801	Glycoside hydrolase, family 35|D-galactoside/L-rhamnose binding SUEL lectin domain|Galactose-binding domain-like|Glycoside hydrolase, superfamily|Glycoside hydrolase, catalytic domain|Glycoside hydrolase, family 35, conserved site	GO:0004553|GO:0005975|GO:0030246|GO:0003824	EC:3.2.1.23	KEGG: 00052+3.2.1.23|KEGG: 00511+3.2.1.23|KEGG: 00531+3.2.1.23|KEGG: 00600+3.2.1.23|KEGG: 00604+3.2.1.23|MetaCyc: PWY-6791|MetaCyc: PWY-6807
Dr13285	GO:0009536	NULL	uncharacterized protein	IPR010298	Protein of unknown function DUF901	NULL	NULL	NULL
Dr13344	NULL	NULL	NULL	IPR002885|IPR011990	Pentatricopeptide repeat|Tetratricopeptide-like helical	GO:0005515	NULL	NULL
Dr13412	GO:0044763|GO:0003676|GO:0006259	NULL	dna repair protein xrcc3-like protein	IPR013632|IPR027417|IPR004504|IPR020588	DNA recombination and repair protein Rad51, C-terminal|DNA repair protein RadA|P-loop containing nucleoside triphosphate hydrolase|DNA recombination/repair protein RecA/RadB, ATP-binding domain	GO:0003684|GO:0005524|GO:0006281|GO:0003677|GO:0006259|GO:0008094	NULL	NULL
Dr13430	GO:0005488	NULL	g-box-binding factor 1	IPR004827	Basic-leucine zipper domain	GO:0003700|GO:0006355|GO:0043565	NULL	NULL
Dr13441	GO:0003916|GO:0009536|GO:0006265	NULL	adaptor protein kanadaptin	IPR000253|IPR013497|IPR006171|IPR008984|IPR023405|IPR013824|IPR013825|IPR000380|IPR003601|IPR003602|IPR023406	Forkhead-associated (FHA) domain|DNA topoisomerase, type IA, central|Toprim domain|DNA topoisomerase, type IA|SMAD/FHA domain|DNA topoisomerase, type IA, core domain|DNA topoisomerase, type IA, central region, subdomain 1|DNA topoisomerase, type IA, central region, subdomain 2|DNA topoisomerase, type IA, domain 2|DNA topoisomerase, type IA, DNA-binding|DNA topoisomerase, type IA, active site	GO:0005515|GO:0003677|GO:0003916|GO:0006265|GO:0003917	NULL	NULL
Dr13411	NULL	NULL	NULL	IPR004158	Protein of unknown function DUF247, plant	NULL	NULL	NULL
Dr13447	NULL	NULL	NULL	NULL	NULL	NULL	NULL	NULL
Dr13497	GO:0004519|GO:0003676	NULL	protein	IPR002711	HNH endonuclease	GO:0003676|GO:0004519	NULL	NULL
Dr13506	GO:0046872	NULL	ring zinc finger expressed	IPR027370|IPR013083|IPR001841|IPR017907	RING-type zinc-finger, LisH dimerisation motif|Zinc finger, RING/FYVE/PHD-type|Zinc finger, RING-type|Zinc finger, RING-type, conserved site	GO:0005515|GO:0008270	NULL	NULL
Dr13513	NULL	NULL	NULL	IPR024768|IPR021139|IPR025605	Meiosis arrest female protein 1|NYN domain, limkain-b1-type|OST-HTH/LOTUS domain	GO:0005777|GO:0010468|GO:0048477	NULL	NULL
Dr13515	NULL	NULL	NULL	IPR001810	F-box domain	GO:0005515	NULL	NULL
Dr13549	GO:0010686|GO:0019745|GO:0016020|GO:0016871|GO:0005739|GO:0006694	EC:5.4.99.8	cycloartenol synthase	IPR008930|IPR018333|IPR002365	Terpenoid cyclases/protein prenyltransferase alpha-alpha toroid|Squalene cyclase|Terpene synthase, conserved site	GO:0016866	NULL	NULL
Dr13523	GO:0009944|GO:0016891|GO:0048608|GO:0003723|GO:0010492|GO:0010267|GO:0051252	EC:3.1.26.0	dicer-like protein 4	IPR001650|IPR000999|IPR003100|IPR005034|IPR027417|IPR014720|IPR014001	Helicase, C-terminal|Ribonuclease III domain|Argonaute/Dicer protein, PAZ domain|Dicer dimerisation domain|P-loop containing nucleoside triphosphate hydrolase|Double-stranded RNA-binding domain|Helicase, superfamily 1/2, ATP-binding domain	GO:0003676|GO:0004386|GO:0005524|GO:0003723|GO:0004525|GO:0006396|GO:0005515|GO:0016891	NULL	NULL
Dr13556	NULL	NULL	NULL	IPR021899	Protein of unknown function DUF3511	NULL	NULL	NULL
Dr02492	GO:0009987|GO:0016023	NULL	molybdopterin biosynthesis protein cnx1-like	IPR001453|IPR005110|IPR005111|IPR020817|IPR008284	Molybdopterin binding domain|MoeA, N-terminal and linker domain|MoeA, C-terminal, domain IV|Molybdenum cofactor synthesis|Molybdenum cofactor biosynthesis, conserved site	GO:0006777|GO:0032324	NULL	MetaCyc: PWY-6823|UniPathway: UPA00344|UniPathway: UPA00344
Dr02546	NULL	NULL	NULL	IPR007656	Zein-binding domain	NULL	NULL	NULL
Dr13673	GO:0009536	NULL	pentatricopeptide repeat-containing protein	IPR013069|IPR002885|IPR011333|IPR011990|IPR000210	BTB/POZ|Pentatricopeptide repeat|BTB/POZ fold|Tetratricopeptide-like helical|BTB/POZ-like	GO:0005515	NULL	NULL
Dr13712	GO:0050789|GO:0009628|GO:0046872|GO:0044699|GO:0042221|GO:0006950	NULL	calmodulin-related protein	IPR011992|IPR002048|IPR018247	EF-hand domain pair|EF-hand domain|EF-Hand 1, calcium-binding site	GO:0005509	NULL	NULL
Dr13714	GO:0003676|GO:0009628|GO:0006950	NULL	chromatin remodeling complex subunit	IPR000330|IPR001650|IPR011992|IPR027417|IPR002048|IPR014001|IPR018247	SNF2-related|Helicase, C-terminal|EF-hand domain pair|P-loop containing nucleoside triphosphate hydrolase|EF-hand domain|Helicase, superfamily 1/2, ATP-binding domain|EF-Hand 1, calcium-binding site	GO:0003677|GO:0005524|GO:0003676|GO:0004386|GO:0005509	NULL	NULL
Dr13760	GO:0005576|GO:0004650|GO:0032440|GO:0004024|GO:0055114|GO:0000166|GO:0008270|GO:0005982|GO:0005985	EC:3.2.1.15|EC:1.3.1.74	nadp-dependent alkenal double bond reductase p2	IPR002085|IPR013149|IPR011032|IPR016040|IPR020843	Alcohol dehydrogenase superfamily, zinc-type|Alcohol dehydrogenase, C-terminal|GroES (chaperonin 10)-like|NAD(P)-binding domain|Polyketide synthase, enoylreductase	GO:0008270|GO:0016491|GO:0055114|GO:0016747	NULL	NULL
Dr13771	NULL	NULL	NULL	IPR001810|IPR006553	F-box domain|Leucine-rich repeat, cysteine-containing subtype	GO:0005515	NULL	NULL
Dr13756	GO:0009941|GO:0018708|GO:0005886|GO:0032259	EC:2.1.1.9	methyl chloride transferase	IPR008854	TPMT family	GO:0008757	EC:2.1.1.67	KEGG: 00983+2.1.1.67
Dr13793	GO:0003676|GO:0016023|GO:0016787|GO:0016020	NULL	metallophosphoesterase at3g03305-like	NULL	NULL	NULL	NULL	NULL
Dr13804	GO:0008152|GO:0016829|GO:0009507	NULL	#NAME?	IPR015813	Pyruvate/Phosphoenolpyruvate kinase-like domain	GO:0003824	NULL	NULL
Dr13870	NULL	NULL	NULL	IPR011040	Sialidases	NULL	NULL	NULL
Dr13877	NULL	NULL	NULL	IPR003788	Putative S-adenosyl-L-methionine-dependent methyltransferase MidA	NULL	NULL	NULL
Dr13910	GO:0005975|GO:0050379|GO:0005739|GO:0000166|GO:0050662|GO:0009117	EC:5.1.3.12	udp-d-glucuronic acid 4-epimerase	IPR001509|IPR016040|IPR008089	NAD-dependent epimerase/dehydratase|Nucleotide sugar epimerase|NAD(P)-binding domain	GO:0003824|GO:0044237|GO:0050662|GO:0005975|GO:0016857	NULL	NULL
Dr13868	GO:0016023	NULL	pentatricopeptide repeat-containing protein	IPR002885|IPR011990	Pentatricopeptide repeat|Tetratricopeptide-like helical	GO:0005515	NULL	NULL
Dr13869	GO:0016023	NULL	cysteine proteinase inhibitor	IPR027214|IPR000010|IPR018073	Cystatin|Proteinase inhibitor I25, cystatin|Proteinase inhibitor I25, cystatin, conserved site	GO:0004869	NULL	NULL
Dr13871	GO:0003917|GO:0005694|GO:0006265|GO:0009536	EC:5.99.1.2	dna topoisomerase iii	IPR000380|IPR013497|IPR006171|IPR023405|IPR013824|IPR013825|IPR003601|IPR003602	DNA topoisomerase, type IA|DNA topoisomerase, type IA, central|Toprim domain|DNA topoisomerase, type IA, core domain|DNA topoisomerase, type IA, central region, subdomain 1|DNA topoisomerase, type IA, central region, subdomain 2|DNA topoisomerase, type IA, domain 2|DNA topoisomerase, type IA, DNA-binding	GO:0003677|GO:0003917|GO:0006265|GO:0003916	NULL	NULL
Dr13882	GO:0052691|GO:0005794|GO:0005515|GO:0030244|GO:0008466|GO:0009651	EC:5.4.99.30|EC:2.4.1.186	alpha- -glucan-protein synthase	IPR004901	Reversibly glycosylated polypeptide family	GO:0016866|GO:0030244	NULL	NULL
Dr13883	NULL	NULL	NULL	IPR002885	Pentatricopeptide repeat	NULL	NULL	NULL
Dr13940	NULL	NULL	NULL	IPR016024	Armadillo-type fold	GO:0005488	NULL	NULL
Dr13958	GO:0006457|GO:0016491|GO:0005528|GO:0031977|GO:0009507|GO:0000413|GO:0016020|GO:0003755|GO:0055114	EC:5.2.1.8	probable fkbp-type peptidyl-prolyl cis-trans isomerase chloroplastic-like	IPR023566|IPR001179	Peptidyl-prolyl cis-trans isomerase, FKBP-type|Peptidyl-prolyl cis-trans isomerase, FKBP-type, domain	GO:0006457	NULL	NULL
Dr13960	GO:0004252|GO:0016021	EC:3.4.21.0	rhomboid protein 2-like	IPR022764	Peptidase S54, rhomboid domain	GO:0004252|GO:0016021	NULL	NULL
Dr13969	GO:0009825|GO:0016021|GO:0032259|GO:0010051|GO:0032876|GO:0016023|GO:0030797|GO:0016126	EC:2.1.1.143	24-methylenesterol c-methyltransferase 2	IPR013216|IPR013705|IPR025769	Methyltransferase type 11|Sterol methyltransferase C-terminal|ERGosterol biosynthesis methyltransferase, plant	GO:0008152|GO:0008168|GO:0006694|GO:0008757	NULL	NULL
Dr13990	GO:0009536	NULL	trna pseudouridine synthase pus10-like	IPR020103	Pseudouridine synthase, catalytic domain	GO:0001522|GO:0003723|GO:0009451|GO:0009982	NULL	NULL
Dr13995	NULL	NULL	NULL	IPR000626|IPR019956|IPR019955|IPR019954	Ubiquitin domain|Ubiquitin|Ubiquitin supergroup|Ubiquitin conserved site	GO:0005515	NULL	NULL
Dr14142	NULL	NULL	NULL	IPR007493	Protein of unknown function DUF538	NULL	NULL	NULL
Dr14058	GO:0004553|GO:0016023|GO:0005975	EC:3.2.1.0	glucan endo- -beta-glucosidase	IPR000490|IPR012946|IPR017853|IPR013781	Glycoside hydrolase, family 17|X8|Glycoside hydrolase, superfamily|Glycoside hydrolase, catalytic domain	GO:0004553|GO:0005975|GO:0003824	EC:3.2.1.39	KEGG: 00500+3.2.1.39
Dr14060	NULL	NULL	NULL	IPR002885|IPR011990	Pentatricopeptide repeat|Tetratricopeptide-like helical	GO:0005515	NULL	NULL
Dr14066	GO:0044238|GO:0044260	NULL	rna polymerase-associated protein rtf1 homolog	IPR004343|IPR018144	Plus-3|Plus-3 domain, subgroup	GO:0003677|GO:0005634|GO:0006352|GO:0016570	NULL	NULL
Dr14056	NULL	NULL	NULL	IPR002885|IPR011990	Pentatricopeptide repeat|Tetratricopeptide-like helical	GO:0005515	NULL	NULL
Dr14067	GO:0003824	NULL	glyoxysomal processing glyoxysomal-like	IPR009003	Trypsin-like cysteine/serine peptidase domain	GO:0003824	NULL	NULL
Dr14069	GO:0044446	NULL	targeting protein for xklp2	IPR002885|IPR027329|IPR027330|IPR011990	Pentatricopeptide repeat|TPX2, C-terminal domain|TPX2 central domain|Tetratricopeptide-like helical	GO:0005515	NULL	NULL
Dr14073	GO:0009536|GO:0003677|GO:0016023|GO:0005524|GO:0004386|GO:0016020	NULL	snf2 super family	IPR000330|IPR001650|IPR027417|IPR014001	SNF2-related|Helicase, C-terminal|P-loop containing nucleoside triphosphate hydrolase|Helicase, superfamily 1/2, ATP-binding domain	GO:0003677|GO:0005524|GO:0003676|GO:0004386	NULL	NULL
Dr14089	GO:0009536	NULL	pentatricopeptide repeat-containing protein chloroplastic-like	IPR002885|IPR011990	Pentatricopeptide repeat|Tetratricopeptide-like helical	GO:0005515	NULL	NULL
Dr14008	NULL	NULL	NULL	IPR005636	DTW	NULL	NULL	NULL
Dr14102	NULL	NULL	NULL	IPR000408|IPR009091	Regulator of chromosome condensation, RCC1|Regulator of chromosome condensation 1/beta-lactamase-inhibitor protein II	NULL	NULL	NULL
Dr14167	GO:0003824	NULL	esterase lipase thioesterase family protein	IPR022742	Putative lysophospholipase	NULL	NULL	NULL
Dr14189	GO:0016787	NULL	btb poz domain-containing protein fbl11-like	IPR011333|IPR000210|IPR006553	BTB/POZ fold|BTB/POZ-like|Leucine-rich repeat, cysteine-containing subtype	GO:0005515	NULL	NULL
Dr14204	GO:0016020	NULL	iron-sulfur assembly-like protein	NULL	NULL	NULL	NULL	NULL
Dr14169	GO:0016740	NULL	phospholipid glycerol acyltransferase family protein	IPR000872|IPR002123	Tafazzin|Phospholipid/glycerol acyltransferase	GO:0008152|GO:0016746	NULL	NULL
Dr14213	GO:0016123|GO:0009536|GO:0016491|GO:0034020|GO:0009688	EC:5.3.99.9	lycopene beta-cyclase	IPR008671|IPR010108	Lycopene cyclase-type, FAD-binding|Lycopene cyclase, beta/epsilon	GO:0016117|GO:0016705	NULL	NULL
Dr14170	GO:0044763|GO:0005856|GO:0000166|GO:0003824|GO:0044707	NULL	kinesin-like calmodulin-binding protein homolog	IPR027640|IPR001752|IPR019748|IPR000857|IPR018979|IPR027417|IPR011254|IPR014352|IPR011993|IPR019749|IPR000299|IPR019821	Kinesin-like protein|Kinesin, motor domain|FERM central domain|MyTH4 domain|FERM, N-terminal|P-loop containing nucleoside triphosphate hydrolase|Prismane-like|FERM/acyl-CoA-binding protein, 3-helical bundle|Pleckstrin homology-like domain|Band 4.1 domain|FERM domain|Kinesin, motor region, conserved site	GO:0003777|GO:0005871|GO:0007018|GO:0005524|GO:0008017|GO:0005856|GO:0003824|GO:0016491|GO:0055114	NULL	NULL
Dr14303	NULL	NULL	NULL	IPR001623|IPR018253	DnaJ domain|DnaJ domain, conserved site	NULL	NULL	NULL
Dr02607	GO:0005488|GO:0044763|GO:0048364|GO:0005856|GO:0009536	NULL	morphogenesis of root hair 2	IPR027640|IPR001752|IPR000225|IPR016024|IPR027417|IPR011989|IPR019821	Kinesin-like protein|Kinesin, motor domain|Armadillo|Armadillo-type fold|P-loop containing nucleoside triphosphate hydrolase|Armadillo-like helical|Kinesin, motor region, conserved site	GO:0003777|GO:0005871|GO:0007018|GO:0005524|GO:0008017|GO:0005515|GO:0005488	NULL	NULL
Dr02615	GO:0009536	NULL	uncharacterized protein	IPR007700|IPR021864	Protein of unknown function DUF668|Protein of unknown function DUF3475	NULL	NULL	NULL
Dr02646	GO:0044464	NULL	tir-nbs resistance protein	IPR002182|IPR000157|IPR027417	NB-ARC|Toll/interleukin-1 receptor homology (TIR) domain|P-loop containing nucleoside triphosphate hydrolase	GO:0043531|GO:0005515|GO:0007165	NULL	NULL
Dr02673	GO:0016023|GO:0016829	NULL	pectate lyase	IPR002022|IPR011050|IPR012334|IPR018082	Pectate lyase/Amb allergen|AmbAllergen|Pectin lyase fold/virulence factor|Pectin lyase fold	NULL	NULL	NULL
Dr02853	NULL	NULL	NULL	IPR001810	F-box domain	GO:0005515	NULL	NULL
Dr02892	GO:0003908|GO:0009570|GO:0015979|GO:0009535|GO:0009654|GO:0006281	EC:2.1.1.63	photosystem ii reaction center psb28 protein	IPR005610	Photosystem II Psb28, class 1	GO:0009523|GO:0009654|GO:0015979|GO:0016020	NULL	NULL
Dr02870	GO:0032580|GO:0030173|GO:0010256|GO:0016023|GO:0006486|GO:0009863|GO:0009826|GO:0009969|GO:0016757|GO:0042353	NULL	xyloglucan galactosyltransferase katamari1-like	IPR004263	Exostosin-like	NULL	NULL	NULL
Dr02880	GO:0016772	NULL	receptor protein kinase-like protein	IPR000719|IPR001611|IPR013210|IPR025875|IPR011009|IPR013320|IPR003591|IPR017441|IPR008266	Protein kinase domain|Leucine-rich repeat|Leucine-rich repeat-containing N-terminal, type 2|Leucine rich repeat 4|Protein kinase-like domain|Concanavalin A-like lectin/glucanase, subgroup|Leucine-rich repeat, typical subtype|Protein kinase, ATP binding site|Tyrosine-protein kinase, active site	GO:0004672|GO:0005524|GO:0006468|GO:0005515|GO:0016772|GO:0004713	NULL	NULL
Dr02891	NULL	NULL	NULL	IPR006016|IPR014729	UspA|Rossmann-like alpha/beta/alpha sandwich fold	GO:0006950	NULL	NULL
Dr02893	GO:0009897|GO:0010103|GO:0006508|GO:0016491|GO:0016023|GO:0042127|GO:0004252	EC:3.4.21.0	subtilisin-like protease sdd1-like	IPR015500|IPR000209|IPR003137|IPR010259|IPR023828	Peptidase S8, subtilisin-related|Peptidase S8/S53 domain|Protease-associated domain, PA|Proteinase inhibitor I9|Peptidase S8, subtilisin, Ser-active site	GO:0004252|GO:0006508|GO:0042802|GO:0043086	NULL	NULL
Dr02900	GO:0005737|GO:0030170|GO:0009611|GO:0004837|GO:0004058|GO:0006570|GO:0009821|GO:0006547|GO:0006558|GO:0006568|GO:0042432	EC:4.1.1.25|EC:4.1.1.28	tyrosine decarboxylase	IPR002129|IPR015424|IPR015421|IPR015422|IPR010977|IPR021115	Pyridoxal phosphate-dependent decarboxylase|Aromatic-L-amino-acid decarboxylase|Pyridoxal phosphate-dependent transferase|Pyridoxal phosphate-dependent transferase, major region, subdomain 1|Pyridoxal phosphate-dependent transferase, major region, subdomain 2|Pyridoxal-phosphate binding site	GO:0016831|GO:0019752|GO:0030170|GO:0003824|GO:0006520	NULL	NULL
Dr02341	GO:0003824|GO:0009536	NULL	alpha beta fold family expressed	NULL	NULL	NULL	NULL	NULL
Dr14358	GO:0005622|GO:0032313	NULL	tbc domain-containing protein	IPR000195	Rab-GTPase-TBC domain	GO:0005097|GO:0032313	NULL	NULL
Dr14349	GO:0046872	NULL	protein	IPR020683|IPR013083|IPR001841|IPR002110	Ankyrin repeat-containing domain|Zinc finger, RING/FYVE/PHD-type|Zinc finger, RING-type|Ankyrin repeat	GO:0005515|GO:0008270	NULL	NULL
Dr14378	GO:0010150|GO:0016023|GO:0034434|GO:0046027|GO:0080095|GO:0016127|GO:0080096|GO:0042967	EC:2.3.1.158	phospholipid--sterol o-acyltransferase-like	IPR003386	Lecithin:cholesterol/phospholipid:diacylglycerol acyltransferase	GO:0006629|GO:0008374	NULL	NULL
Dr14381	GO:0097159|GO:1901363	NULL	ribonucleoprotein 1	IPR000504|IPR012677	RNA recognition motif domain|Nucleotide-binding, alpha-beta plait	GO:0003676|GO:0000166	NULL	NULL
Dr14389	NULL	NULL	NULL	IPR002075|IPR012677|IPR000504|IPR018222	Nuclear transport factor 2|Nucleotide-binding, alpha-beta plait|RNA recognition motif domain|Nuclear transport factor 2, eukaryote	GO:0005622|GO:0006810|GO:0000166|GO:0003676	NULL	NULL
Dr14394	NULL	NULL	NULL	IPR011990|IPR019734|IPR013026	Tetratricopeptide-like helical|Tetratricopeptide repeat|Tetratricopeptide repeat-containing domain	GO:0005515	NULL	NULL
Dr14402	GO:0005739	NULL	uncharacterized protein	IPR004314|IPR025521	Domain of unknown function DUF239|Domain of unknown function DUF4409	NULL	NULL	NULL
Dr14410	GO:0016491|GO:0009536	NULL	protein	IPR007516|IPR007525	Coenzyme F420 hydrogenase/dehydrogenase beta subunit, N-terminal|Coenzyme F420 hydrogenase/dehydrogenase beta subunit, C-terminal	NULL	NULL	NULL
Dr14420	GO:0005730|GO:0010111|GO:0005773|GO:0005777|GO:0005886|GO:0009507|GO:0005739|GO:0003988|GO:0006550|GO:0006552|GO:0006574|GO:0006633|GO:0006699|GO:0018874|GO:0042967	EC:2.3.1.16	3-ketoacyl- thiolase	IPR002155|IPR020616|IPR020617|IPR016039|IPR016038|IPR020615|IPR020610|IPR020613	Thiolase|Thiolase, N-terminal|Thiolase, C-terminal|Thiolase-like|Thiolase-like, subgroup|Thiolase, acyl-enzyme intermediate active site|Thiolase, active site|Thiolase, conserved site	GO:0008152|GO:0016747|GO:0003824	NULL	Reactome: REACT_22258
Dr14423	GO:0016123|GO:0009055|GO:0005506|GO:0020037|GO:0009507|GO:0010291|GO:0070330|GO:0055114|GO:0006118	EC:1.14.14.1	protein lutein deficient chloroplastic-like	IPR001128|IPR002401|IPR017972	Cytochrome P450|Cytochrome P450, E-class, group I|Cytochrome P450, conserved site	GO:0005506|GO:0016705|GO:0020037|GO:0055114	NULL	Reactome: REACT_13433
Dr14426	GO:0003676|GO:0005739|GO:0006427|GO:0005524|GO:0004386|GO:0004821|GO:0009507|GO:0006547	EC:6.1.1.21	histidyl-trna synthetase	IPR004516|IPR004154|IPR015807|IPR006195	Histidine-tRNA ligase/ATP phosphoribosyltransferase regulatory subunit|Anticodon-binding|Histidine-tRNA ligase|Aminoacyl-tRNA synthetase, class II	GO:0005737|GO:0004821|GO:0005524|GO:0006427|GO:0004812|GO:0006418	EC:6.1.1.21	Reactome: REACT_71|KEGG: 00970+6.1.1.21|Reactome: REACT_71
Dr14370	GO:0044260|GO:1901576|GO:0016779|GO:1901363|GO:0044238|GO:0097159|GO:1901360	EC:2.7.7.0	translation initiation factor eif-2b epsilon subunit	IPR005835|IPR003307|IPR016024|IPR016021	Nucleotidyl transferase|W2 domain|Armadillo-type fold|MIF4-like, type 1/2/3	GO:0009058|GO:0016779|GO:0005515|GO:0005488	NULL	Reactome: REACT_17015
Dr14442	GO:0005829|GO:0005975|GO:0006520|GO:0016308|GO:0005524|GO:0046854|GO:0016020|GO:0005634	EC:2.7.1.68	phosphatidylinositol-4-phosphate 5-kinase 9	IPR023610|IPR002498|IPR003409|IPR027484|IPR027483|IPR016034|IPR017163	Phosphatidylinositol-4-phosphate 5-kinase|Phosphatidylinositol-4-phosphate 5-kinase, core|MORN motif|Phosphatidylinositol-4-phosphate 5-kinase, N-terminal domain|Phosphatidylinositol-4-phosphate 5-kinase, C-terminal|Phosphatidylinositol-4-phosphate 5-kinase, core, subgroup|Phosphatidylinositol-4-phosphate 5-kinase, plant	GO:0016307|GO:0046488|GO:0005524|GO:0016308	EC:2.7.1.68	KEGG: 00562+2.7.1.68|MetaCyc: PWY-6351|MetaCyc: PWY-6352
Dr14443	GO:0015204|GO:0016021|GO:0042742|GO:0009941|GO:0071918|GO:0009705|GO:0080170|GO:0006833|GO:0000326|GO:0042807|GO:0043674|GO:0030104|GO:0005783|GO:0005886	NULL	tonoplast intrinsic protein	IPR000425|IPR023271|IPR022357	Major intrinsic protein|Aquaporin-like|Major intrinsic protein, conserved site	GO:0005215|GO:0006810|GO:0016020	NULL	NULL
Dr14447	NULL	NULL	NULL	IPR009851|IPR027443	Modifier of rudimentary, Modr|Isopenicillin N synthase-like	NULL	NULL	NULL
Dr14373	GO:0050660|GO:0050661|GO:0005777|GO:0045454|GO:0004362|GO:0006749|GO:0022900|GO:0006094|GO:0006118	EC:1.8.1.7	glutathione reductase	IPR001327|IPR004099|IPR023753|IPR016156|IPR013027|IPR006324|IPR012999	Pyridine nucleotide-disulphide oxidoreductase, NAD-binding domain|Pyridine nucleotide-disulphide oxidoreductase, dimerisation domain|Pyridine nucleotide-disulphide oxidoreductase, FAD/NAD(P)-binding domain|FAD-dependent pyridine nucleotide-disulphide oxidoreductase|FAD/NAD-linked reductase, dimerisation domain|Glutathione-disulphide reductase|Pyridine nucleotide-disulphide oxidoreductase, class I…	GO:0016491|GO:0050660|GO:0055114|GO:0045454|GO:0004362|GO:0006749|GO:0050661|GO:0016668	EC:1.8.1.7	KEGG: 00480+1.8.1.7|MetaCyc: PWY-4081
Dr14450	GO:0016310|GO:0006464|GO:0004672|GO:0000166|GO:0044424	NULL	u-box domain-containing protein 33-like	IPR000719|IPR003613|IPR011009|IPR013320|IPR013083|IPR014729|IPR002290|IPR017441|IPR008271	Protein kinase domain|U box domain|Protein kinase-like domain|Concanavalin A-like lectin/glucanase, subgroup|Zinc finger, RING/FYVE/PHD-type|Rossmann-like alpha/beta/alpha sandwich fold|Serine/threonine- / dual specificity protein kinase, catalytic domain|Protein kinase, ATP binding site|Serine/threonine-protein kinase, active site	GO:0004672|GO:0005524|GO:0006468|GO:0000151|GO:0004842|GO:0016567|GO:0016772|GO:0004674	NULL	NULL
Dr14452	GO:0009536	NULL	kinesin-like protein	IPR027640|IPR001752|IPR010994|IPR027417	Kinesin-like protein|Kinesin, motor domain|RuvA domain 2-like|P-loop containing nucleoside triphosphate hydrolase	GO:0003777|GO:0005871|GO:0007018|GO:0005524|GO:0008017	NULL	Reactome: REACT_216
Dr14453	GO:0009555|GO:0005507|GO:0004160|GO:0009570|GO:0009097|GO:0009098|GO:0009099|GO:0015940	EC:4.2.1.9	dihydroxy-acid dehydratase	IPR000581|IPR015928|IPR004404|IPR020558	Dihydroxy-acid/6-phosphogluconate dehydratase|Aconitase/3-isopropylmalate dehydratase, swivel|Dihydroxy-acid dehydratase|Dihydroxy-acid/6-phosphogluconate dehydratase, conserved site	GO:0003824|GO:0008152|GO:0004160|GO:0009082	EC:4.2.1.9	KEGG: 00290+4.2.1.9|KEGG: 00770+4.2.1.9|MetaCyc: PWY-5101|MetaCyc: PWY-5103|MetaCyc: PWY-5104|MetaCyc: PWY-7111|UniPathway: UPA00047|UniPathway: UPA00049
Dr14459	GO:0006468|GO:0004672|GO:0005524|GO:0009742|GO:0005886	NULL	probable serine threonine-protein kinase at5g41260-like	IPR001245|IPR011009|IPR011990|IPR000719	Serine-threonine/tyrosine-protein kinase catalytic domain|Protein kinase-like domain|Tetratricopeptide-like helical|Protein kinase domain	GO:0004672|GO:0006468|GO:0016772|GO:0005515|GO:0005524	NULL	NULL
Dr14329	NULL	NULL	NULL	NULL	NULL	NULL	NULL	NULL
Dr14383	GO:0009628|GO:0009534	NULL	proton gradient regulation 5	NULL	NULL	NULL	NULL	NULL
Dr14386	GO:0009536	NULL	uncharacterized protein yqjg-like	IPR016639|IPR004045|IPR010987|IPR012336	Glutathione S-transferase (GST)|Glutathione S-transferase, N-terminal|Glutathione S-transferase, C-terminal-like|Thioredoxin-like fold	GO:0005515	EC:2.5.1.18	KEGG: 00480+2.5.1.18|KEGG: 00980+2.5.1.18|KEGG: 00982+2.5.1.18|MetaCyc: PWY-4061|MetaCyc: PWY-6842|MetaCyc: PWY-7112
Dr14391	GO:0016301|GO:0016310|GO:0005739	NULL	probable serine threonine-protein kinase abkc-like	IPR004147|IPR011009	UbiB domain|Protein kinase-like domain	GO:0016772	NULL	NULL
Dr14392	GO:0003676|GO:0006886|GO:0005741|GO:0030529|GO:0000166	NULL	protein	IPR000504|IPR012677	RNA recognition motif domain|Nucleotide-binding, alpha-beta plait	GO:0003676|GO:0000166	NULL	NULL
Dr14393	GO:0009535|GO:0005739	NULL	ammonium transporter	NULL	NULL	NULL	NULL	NULL
Dr14331	GO:0008270|GO:0043565|GO:0003700|GO:0045893|GO:0005667|GO:0045449	NULL	gata transcription factor 9-like	IPR000679|IPR013088	Zinc finger, GATA-type|Zinc finger, NHR/GATA-type	GO:0003700|GO:0006355|GO:0008270|GO:0043565	NULL	NULL
Dr14397	GO:0009543|GO:0008236|GO:0006508|GO:0005739	NULL	peptidase s41 family protein	IPR005151|IPR001478|IPR004447	Interphotoreceptor retinol-binding|PDZ domain|C-terminal-processing peptidase S41A	GO:0006508|GO:0008236|GO:0005515	NULL	NULL
Dr14407	GO:0044434|GO:0009579	NULL	metal ion binding	NULL	NULL	NULL	NULL	NULL
Dr14411	GO:0004672|GO:0006468|GO:0005524|GO:0009507	NULL	protein	IPR002575|IPR004147|IPR011009|IPR000719	Aminoglycoside phosphotransferase|UbiB domain|Protein kinase-like domain|Protein kinase domain	GO:0016772|GO:0004672|GO:0005524|GO:0006468	NULL	NULL
Dr14414	GO:0046872|GO:0009055|GO:0045454|GO:0009570|GO:0051537|GO:0015035|GO:0006118	NULL	grx_s12 - glutaredoxin subgroup i	IPR002109|IPR012336|IPR014025|IPR011899	Glutaredoxin|Glutaredoxin subgroup|Thioredoxin-like fold|Glutaredoxin, eukaryotic/virial	GO:0009055|GO:0015035|GO:0045454	NULL	NULL
Dr14332	GO:0016023|GO:0008146	EC:2.8.2.0	protein-tyrosine sulfotransferase	IPR010635|IPR005331|IPR027417	Heparan sulphate 6-sulfotransferase/Protein-tyrosine sulfotransferase|Sulfotransferase|P-loop containing nucleoside triphosphate hydrolase	GO:0008146|GO:0016021	EC:2.8.2.-	KEGG: 00380+2.8.2.-|KEGG: 00513+2.8.2.-|KEGG: 00514+2.8.2.-|KEGG: 00532+2.8.2.-|KEGG: 00533+2.8.2.-|KEGG: 00534+2.8.2.-|KEGG: 00624+2.8.2.-|KEGG: 00966+2.8.2.-
Dr14424	GO:0009536|GO:0010541|GO:0015408|GO:0009958|GO:0009624|GO:0016021|GO:0043481|GO:0010329|GO:0009640|GO:0010540|GO:0008361|GO:0009637|GO:0010315|GO:0008559|GO:0006200|GO:0005886|GO:0005524|GO:0048443|GO:0015682|GO:0006855	EC:3.6.3.30|EC:3.6.3.44	abc transporter b family member 1-like	IPR003439|IPR001140|IPR027417|IPR011527|IPR003593|IPR017871	ABC transporter-like|ABC transporter, transmembrane domain|P-loop containing nucleoside triphosphate hydrolase|ABC transporter type 1, transmembrane domain|AAA+ ATPase domain|ABC transporter, conserved site	GO:0005524|GO:0016887|GO:0006810|GO:0016021|GO:0042626|GO:0055085|GO:0000166|GO:0017111	NULL	NULL
Dr14429	NULL	NULL	NULL	IPR001594	Zinc finger, DHHC-type, palmitoyltransferase	GO:0008270	NULL	NULL
Dr14434	GO:0016020	NULL	autophagy-related protein 9-like	IPR007241	Autophagy-related protein 9	NULL	NULL	NULL
Dr14441	NULL	NULL	NULL	IPR019787|IPR016181|IPR011011|IPR013083|IPR001965|IPR019786	Zinc finger, PHD-finger|Acyl-CoA N-acyltransferase|Zinc finger, FYVE/PHD-type|Zinc finger, RING/FYVE/PHD-type|Zinc finger, PHD-type|Zinc finger, PHD-type, conserved site	GO:0005515|GO:0008270	NULL	NULL
Dr14336	GO:0004672|GO:0016023|GO:0043167|GO:0000166|GO:0016310	NULL	protein kinase	IPR000719|IPR011009|IPR013320|IPR002290|IPR017441|IPR008271	Protein kinase domain|Protein kinase-like domain|Concanavalin A-like lectin/glucanase, subgroup|Serine/threonine- / dual specificity protein kinase, catalytic domain|Protein kinase, ATP binding site|Serine/threonine-protein kinase, active site	GO:0004672|GO:0005524|GO:0006468|GO:0016772|GO:0004674	NULL	NULL
Dr14341	GO:0043231|GO:0006281|GO:0009909|GO:0009637|GO:0003913|GO:0006325	NULL	cryptochrome 2	IPR006050|IPR005101|IPR014729|IPR002081|IPR014134|IPR018394	DNA photolyase, N-terminal|DNA photolyase, FAD-binding/Cryptochrome, C-terminal|Cryptochrome/DNA photolyase, class 1|Rossmann-like alpha/beta/alpha sandwich fold|Cryptochrome, plant|Cryptochrome/DNA photolyase, class 1 conserved site, C-terminal	GO:0003913|GO:0006281	NULL	NULL
Dr14347	GO:0009941|GO:0004032|GO:0009570|GO:0055114|GO:0006000|GO:0006012|GO:0006013|GO:0006090|GO:0046486	EC:1.1.1.21	protein tas-like	IPR001395|IPR023210|IPR020471	Aldo/keto reductase|NADP-dependent oxidoreductase domain|Aldo/keto reductase subgroup	GO:0016491|GO:0055114	NULL	NULL
Dr14345	GO:0009058|GO:0016874|GO:0000166|GO:0005737	NULL	pantoate--beta-alanine ligase	IPR003721|IPR014729|IPR004821	Pantoate-beta-alanine ligase|Rossmann-like alpha/beta/alpha sandwich fold|Cytidyltransferase-like domain	GO:0004592|GO:0015940|GO:0003824|GO:0009058	EC:6.3.2.1	KEGG: 00410+6.3.2.1|KEGG: 00770+6.3.2.1|UniPathway: UPA00028
Dr14353	GO:0003677|GO:0006355	NULL	nac domain ipr003441	IPR003441	NAC domain	GO:0003677|GO:0006355	NULL	NULL
Dr14355	GO:0016023|GO:0005794|GO:0032259|GO:0005634|GO:0008270|GO:0005886|GO:0008168	EC:2.1.1.0	probable methyltransferase pmt8-like	IPR004159	Putative S-adenosyl-L-methionine-dependent methyltransferase	GO:0008168	EC:2.1.1.-	KEGG: 00130+2.1.1.-|KEGG: 00253+2.1.1.-|KEGG: 00270+2.1.1.-|KEGG: 00340+2.1.1.-|KEGG: 00350+2.1.1.-|KEGG: 00360+2.1.1.-|KEGG: 00380+2.1.1.-|KEGG: 00450+2.1.1.-|KEGG: 00522+2.1.1.-|KEGG: 00624+2.1.1.-|KEGG: 00627+2.1.1.-|KEGG: 00860+2.1.1.-|KEGG: 00940+2.1.1.-|KEGG: 00941+2.1.1.-|KEGG: 00942+2.1.1.-|KEGG: 00945+2.1.1.-|KEGG: 00950+2.1.1.-|KEGG: 00981+2.1.1.-
Dr14348	GO:0003676	NULL	rho termination factor	NULL	NULL	NULL	NULL	NULL
Dr14474	NULL	NULL	NULL	IPR007877	Protein of unknown function DUF707	NULL	NULL	NULL
Dr14463	NULL	NULL	NULL	NULL	NULL	NULL	NULL	NULL
Dr14465	GO:0016120|GO:0009507|GO:0016020	NULL	15-cis-zeta-carotene isomerase	IPR009915	NnrU	NULL	NULL	NULL
Dr14478	NULL	NULL	NULL	IPR001471|IPR016177	AP2/ERF domain|DNA-binding domain	GO:0003700|GO:0006355|GO:0003677	NULL	NULL
Dr14482	GO:0005543	NULL	uncharacterized protein	IPR002913|IPR009769|IPR011993|IPR023393|IPR001849	START domain|Domain of unknown function DUF1336|Pleckstrin homology-like domain|START-like domain|Pleckstrin homology domain	GO:0008289|GO:0005515|GO:0005543	NULL	NULL
Dr14487	GO:0005739	NULL	mitochondrial glycoprotein family protein	IPR003428	Mitochondrial glycoprotein	GO:0005759	NULL	NULL
Dr14488	NULL	NULL	NULL	NULL	NULL	NULL	NULL	NULL
Dr14493	NULL	NULL	NULL	NULL	NULL	NULL	NULL	NULL
Dr14498	GO:0042538|GO:0005773|GO:0009409|GO:0005886|GO:0006810|GO:0005783|GO:0009408|GO:0009416|GO:0005739|GO:0005215	NULL	temperature-induced lipocalin	IPR000566|IPR011038|IPR012674|IPR022271	Lipocalin/cytosolic fatty-acid binding domain|Calycin-like|Calycin|Lipocalin, ApoD type	NULL	NULL	NULL
Dr14513	GO:0008886|GO:0005829|GO:0006950|GO:0055114|GO:0006096	EC:1.2.1.9	nadp-dependent glyceraldehyde-3-phosphate dehydrogenase	IPR015590|IPR016161|IPR016163|IPR016162|IPR016160	Aldehyde dehydrogenase domain|Aldehyde/histidinol dehydrogenase|Aldehyde dehydrogenase, C-terminal|Aldehyde dehydrogenase, N-terminal|Aldehyde dehydrogenase, conserved site	GO:0008152|GO:0016491|GO:0055114|GO:0016620	NULL	NULL
Dr14529	GO:0032502|GO:0007126|GO:0009536	NULL	multipolar spindle 1	NULL	NULL	NULL	NULL	NULL
Dr14531	GO:0016023|GO:0005618|GO:0003743|GO:0009507|GO:0005840|GO:0006446	NULL	translation initiation factor if-3	IPR001288|IPR019815|IPR019814	Translation initiation factor 3|Translation initiation factor 3, C-terminal|Translation initiation factor 3, N-terminal	GO:0003743|GO:0006413	NULL	NULL
Dr14538	GO:0016023|GO:0005773|GO:0004185|GO:0006508	EC:3.4.16.0	serine carboxypeptidase ii-2	IPR001563|IPR018202	Peptidase S10, serine carboxypeptidase|Peptidase S10, serine carboxypeptidase, active site	GO:0004185|GO:0006508	NULL	NULL
Dr14542	GO:0009536	NULL	tsi1-interacting protein tsip1	IPR001305	Heat shock protein DnaJ, cysteine-rich domain	GO:0031072|GO:0051082	NULL	NULL
Dr14544	NULL	NULL	NULL	NULL	NULL	NULL	NULL	NULL
Dr14547	GO:0097159|GO:1901363	NULL	zinc finger ccch domain-containing protein 18-like	IPR000467|IPR000571	G-patch domain|Zinc finger, CCCH-type	GO:0003676|GO:0046872	NULL	NULL
Dr14552	GO:0043447|GO:0010025|GO:0042335|GO:0005488|GO:0046184|GO:0016020	NULL	gl1 protein	IPR006694|IPR021940|IPR016040	Fatty acid hydroxylase|Uncharacterised domain Wax2, C-terminal|NAD(P)-binding domain	GO:0005506|GO:0006633|GO:0016491|GO:0055114	NULL	NULL
Dr14562	GO:0016757|GO:0016787|GO:0005992|GO:0009536	NULL	probable -trehalose-phosphate synthase	IPR001830|IPR003337|IPR023214|IPR006379	Glycosyl transferase, family 20|Trehalose-phosphatase|HAD-like domain|HAD-superfamily hydrolase, subfamily IIB	GO:0003824|GO:0005992|GO:0008152	NULL	Reactome: REACT_17015
Dr14571	GO:0005840|GO:0003735|GO:0006412|GO:0005739|GO:0042254	NULL	50s ribosomal protein l4	IPR013005|IPR002136|IPR023574	Ribosomal protein L4/L1e, bacterial-type|Ribosomal protein L4/L1e|Ribosomal protein L4 domain	GO:0003735|GO:0005840|GO:0006412	NULL	NULL
Dr14480	GO:0003678|GO:0032508|GO:0042555|GO:0003677|GO:0005524|GO:0006270|GO:0005737|GO:0005634|GO:0005657	NULL	dna replication licensing factor mcm5-a-like	IPR001208|IPR027925|IPR012340|IPR027417|IPR008048|IPR018525	Mini-chromosome maintenance, DNA-dependent ATPase|MCM N-terminal domain|DNA replication licensing factor Mcm|Nucleic acid-binding, OB-fold|P-loop containing nucleoside triphosphate hydrolase|Mini-chromosome maintenance, conserved site	GO:0003677|GO:0005524|GO:0006260|GO:0003678|GO:0005634|GO:0006270|GO:0042555	NULL	Reactome: REACT_152|Reactome: REACT_1538|Reactome: REACT_383
Dr14512	GO:0042742|GO:0016023|GO:0050832|GO:0005783|GO:0004169|GO:0000136	EC:2.4.1.109	stromal cell-derived factor 2-like protein	IPR027005|IPR016093	Glycosyltransferase 39 like|MIR motif	GO:0016020	NULL	NULL
Dr14515	GO:0045485|GO:0006636|GO:0010205|GO:0031969	NULL	chloroplast omega-6 fatty acid desaturase	IPR005804	Fatty acid desaturase, type 1	GO:0006629	NULL	NULL
Dr14522	GO:0005737|GO:0000773|GO:0080101|GO:0008654|GO:0016627|GO:0032259|GO:0016021|GO:0006544|GO:0006563|GO:0006566	EC:2.1.1.71	phospholipid n-methyltransferase	IPR024960|IPR007318	Phosphatidylethanolamine N-methyltransferase/Methylene-fatty-acyl-phospholipid synthase|Phospholipid methyltransferase	GO:0006644|GO:0008170	EC:2.1.1.17+2.1.1.71|EC:2.1.1.17	KEGG: 00564+2.1.1.17+2.1.1.71|MetaCyc: PWY-6825|UniPathway: UPA00753|KEGG: 00564+2.1.1.17|MetaCyc: PWY-6825|UniPathway: UPA00753
Dr14545	GO:0005773|GO:0016787|GO:0016853	NULL	nudix hydrolase 3-like	IPR015797	NUDIX hydrolase domain-like	GO:0016787	NULL	NULL
Dr14551	GO:0005524|GO:0009507|GO:0005739|GO:0005516	NULL	gamete expressed 2 protein	IPR005654|IPR017868|IPR027417|IPR014756|IPR013783	ATPase, AFG1-like|Filamin/ABP280 repeat-like|P-loop containing nucleoside triphosphate hydrolase|Immunoglobulin E-set|Immunoglobulin-like fold	GO:0005524	NULL	NULL
Dr14556	NULL	NULL	NULL	IPR002125|IPR016193	CMP/dCMP deaminase, zinc-binding|Cytidine deaminase-like	GO:0008270|GO:0016787|GO:0003824	NULL	NULL
Dr14566	GO:0055085|GO:0008643|GO:0016021	NULL	protein	IPR004853	Triose-phosphate transporter domain	NULL	NULL	NULL
Dr14651	GO:0005739|GO:0016020	NULL	sulfite exporter family protein	IPR002781	Transmembrane protein TauE like	GO:0016021	NULL	NULL
Dr14653	GO:0046872|GO:0016874|GO:0016567|GO:0044428|GO:0006974	NULL	zinc ion binding protein	IPR026848|IPR019162|IPR013083	E3 ubiquitin-protein ligase FANCL|Fanconi anemia complex, subunit FancL, WD-repeat containing domain|Zinc finger, RING/FYVE/PHD-type	GO:0004842|GO:0006281|GO:0043240	EC:6.3.2.-	KEGG: 00300+6.3.2.-|KEGG: 00380+6.3.2.-|UniPathway: UPA00143
Dr14659	GO:0003676|GO:0004386|GO:0000166	NULL	dead box atp-dependent rna	IPR011545|IPR001650|IPR027417|IPR014001|IPR014014	DNA/RNA helicase, DEAD/DEAH box type, N-terminal|Helicase, C-terminal|P-loop containing nucleoside triphosphate hydrolase|Helicase, superfamily 1/2, ATP-binding domain|RNA helicase, DEAD-box type, Q motif	GO:0003676|GO:0005524|GO:0008026|GO:0004386	NULL	NULL
Dr14672	GO:0005388|GO:0048364|GO:0016021|GO:0006828|GO:0015410|GO:0046872|GO:0055071|GO:0005524|GO:0006816|GO:0012505|GO:0005794|GO:0016529	EC:3.6.3.8|EC:3.6.3.35	calcium-transporting atpase endoplasmic reticulum-type-like	IPR008250|IPR006068|IPR023214|IPR023299|IPR023298|IPR001757|IPR005782	P-type ATPase, A domain|Cation-transporting P-type ATPase, C-terminal|HAD-like domain|Cation-transporting P-type ATPase|P-type ATPase, cytoplasmic domain N|P-type ATPase, transmembrane domain|Calcium-transporting P-type ATPase, subfamily IIA, SERCA-type	GO:0000166|GO:0046872|GO:0006812|GO:0016021|GO:0019829|GO:0005388|GO:0006816	NULL	NULL
Dr14680	GO:0008270|GO:0006544|GO:0005747|GO:0050897|GO:0032259|GO:0035999|GO:0004372|GO:0006563|GO:0030170|GO:0008168	EC:2.1.2.1|EC:2.1.1.0	mitochondrial serine hydroxymethyltransferase	IPR001085|IPR015424|IPR015421|IPR015422|IPR019798	Serine hydroxymethyltransferase|Pyridoxal phosphate-dependent transferase|Pyridoxal phosphate-dependent transferase, major region, subdomain 1|Pyridoxal phosphate-dependent transferase, major region, subdomain 2|Serine hydroxymethyltransferase, pyridoxal phosphate binding site	GO:0004372|GO:0006544|GO:0006563|GO:0003824|GO:0030170	EC:2.1.2.1	KEGG: 00260+2.1.2.1|KEGG: 00460+2.1.2.1|KEGG: 00630+2.1.2.1|KEGG: 00670+2.1.2.1|KEGG: 00680+2.1.2.1|MetaCyc: PWY-1622|MetaCyc: PWY-181|MetaCyc: PWY-2161|MetaCyc: PWY-2201|MetaCyc: PWY-3661|MetaCyc: PWY-3841|MetaCyc: PWY-5497|UniPathway: UPA00193|UniPathway: UPA00288
Dr14682	GO:0050896|GO:0003725	NULL	c-terminal domain phosphatase-like protein	IPR014720|IPR004274|IPR023214	Double-stranded RNA-binding domain|NLI interacting factor|HAD-like domain	GO:0005515	NULL	NULL
Dr14584	GO:0000166|GO:0055114|GO:0008270|GO:0051903	EC:1.1.1.284	alcohol dehydrogenase	IPR002085|IPR013149|IPR013154|IPR011032|IPR016040	Alcohol dehydrogenase superfamily, zinc-type|Alcohol dehydrogenase, C-terminal|Alcohol dehydrogenase GroES-like|GroES (chaperonin 10)-like|NAD(P)-binding domain	GO:0008270|GO:0016491|GO:0055114	NULL	NULL
Dr14630	NULL	NULL	NULL	IPR017986|IPR015943	WD40-repeat-containing domain|WD40/YVTN repeat-like-containing domain	GO:0005515	NULL	NULL
Dr14633	GO:0016132|GO:0055114|GO:0016705|GO:0009055|GO:0004497|GO:0016023|GO:0048366|GO:0020037|GO:0005506|GO:0016020|GO:0006118	NULL	steroid 22-alpha-hydroxylase	IPR001128|IPR002401|IPR017972	Cytochrome P450|Cytochrome P450, E-class, group I|Cytochrome P450, conserved site	GO:0005506|GO:0016705|GO:0020037|GO:0055114	NULL	Reactome: REACT_13433
Dr14644	NULL	NULL	NULL	IPR005554	Nrap protein	NULL	NULL	NULL
Dr14650	GO:0000139|GO:0048280|GO:0008565|GO:0006886|GO:0005829|GO:0005739	NULL	golgin candidate 6-like	IPR024095|IPR006953|IPR006955|IPR016024|IPR011989	Vesicle tethering protein p115-like|Vesicle tethering protein Uso1/P115-like , head domain|Uso1/p115-like vesicle tethering protein, C-terminal|Armadillo-type fold|Armadillo-like helical	GO:0048193|GO:0000139|GO:0005737|GO:0006886|GO:0048280|GO:0008565|GO:0016020|GO:0005488	NULL	NULL
Dr14655	GO:0052654|GO:0009081|GO:0052656|GO:0052655	EC:2.6.1.42	branched-chain-amino-acid aminotransferase	IPR001544|IPR005786|IPR018300	Aminotransferase, class IV|Branched-chain amino acid aminotransferase II|Aminotransferase, class IV, conserved site	GO:0003824|GO:0008152|GO:0004084|GO:0009081	EC:2.6.1.42	Reactome: REACT_13|KEGG: 00280+2.6.1.42|KEGG: 00290+2.6.1.42|KEGG: 00770+2.6.1.42|KEGG: 00966+2.6.1.42|MetaCyc: PWY-5057|MetaCyc: PWY-5076|MetaCyc: PWY-5078|MetaCyc: PWY-5101|MetaCyc: PWY-5103|MetaCyc: PWY-5104|MetaCyc: PWY-5108|Reactome: REACT_13
Dr14661	NULL	NULL	NULL	IPR014977|IPR014978	WRC|Glutamine-Leucine-Glutamine, QLQ	GO:0005515|GO:0005524|GO:0005634|GO:0006355|GO:0016818	NULL	NULL
Dr14664	GO:0005525|GO:0000917|GO:0005739	NULL	gtp-binding protein	IPR006073|IPR027417|IPR019987	GTP binding domain|P-loop containing nucleoside triphosphate hydrolase|GTP-binding protein, ribosome biogenesis, YsxC	GO:0005525|GO:0000917	NULL	NULL
Dr14677	NULL	NULL	NULL	NULL	NULL	NULL	NULL	NULL
Dr14679	GO:0005488	NULL	disease resistance response protein	IPR004265	Plant disease resistance response protein	NULL	NULL	NULL
Dr14581	NULL	NULL	NULL	NULL	NULL	NULL	NULL	NULL
Dr14583	NULL	NULL	NULL	NULL	NULL	NULL	NULL	NULL
Dr14591	GO:0046872|GO:0003676|GO:0003824	NULL	snf2 domain-containing protein	IPR000330|IPR001650|IPR027417|IPR013083|IPR001841|IPR014001|IPR017907	SNF2-related|Helicase, C-terminal|P-loop containing nucleoside triphosphate hydrolase|Zinc finger, RING/FYVE/PHD-type|Zinc finger, RING-type|Helicase, superfamily 1/2, ATP-binding domain|Zinc finger, RING-type, conserved site	GO:0003677|GO:0005524|GO:0003676|GO:0004386|GO:0005515|GO:0008270	NULL	NULL
Dr14607	GO:0009941|GO:0004252|GO:0009840|GO:0009658|GO:0009534|GO:0006508|GO:0015979	EC:3.4.21.0	atp-dependent clp protease proteolytic subunit	IPR023562|IPR001907	Clp protease proteolytic subunit /Translocation-enhancing protein TepA|ClpP	GO:0004252|GO:0006508	NULL	NULL
Dr14618	GO:0050794	NULL	rna polymerase ii transcription mediator	NULL	NULL	NULL	NULL	NULL
Dr14593	NULL	NULL	NULL	IPR001005|IPR009057|IPR006447|IPR017930	SANT/Myb domain|Homeodomain-like|Myb domain, plants|Myb domain	GO:0003682|GO:0003677	NULL	NULL
Dr14631	GO:0006468|GO:0005524|GO:0004674|GO:0009536|GO:0009069	EC:2.7.11.0	protein kinase family protein	IPR001245|IPR011009|IPR013320|IPR002290|IPR000719|IPR017441|IPR008271	Serine-threonine/tyrosine-protein kinase catalytic domain|Protein kinase-like domain|Concanavalin A-like lectin/glucanase, subgroup|Serine/threonine- / dual specificity protein kinase, catalytic domain|Protein kinase domain|Protein kinase, ATP binding site|Serine/threonine-protein kinase, active site	GO:0004672|GO:0006468|GO:0016772|GO:0005524|GO:0004674	NULL	NULL
Dr14701	GO:0016020|GO:0008375	NULL	protein	IPR003406	Glycosyl transferase, family 14	GO:0008375|GO:0016020	NULL	NULL
Dr14717	GO:0009536	NULL	uncharacterized protein	IPR009769	Domain of unknown function DUF1336	NULL	NULL	NULL
Dr14688	GO:0009536	NULL	protein	IPR011013|IPR014718	Galactose mutarotase-like domain|Glycoside hydrolase-type carbohydrate-binding, subgroup	GO:0003824|GO:0005975|GO:0030246	NULL	NULL
Dr14697	GO:0055085|GO:0008324|GO:0044464|GO:0006812|GO:0016020	NULL	ca2+ antiporter cation exchanger	IPR004837	Sodium/calcium exchanger membrane region	GO:0016021|GO:0055085	NULL	Reactome: REACT_15518
Dr14728	GO:0005739|GO:0097159|GO:1901363	NULL	protein	IPR000504|IPR012677|IPR003954	RNA recognition motif domain|Nucleotide-binding, alpha-beta plait|RNA recognition motif domain, eukaryote	GO:0003676|GO:0000166	NULL	NULL
Dr14734	GO:0043231|GO:0044444	NULL	uncharacterized protein	IPR008258|IPR023346	Lytic transglycosylase-like SLT domain|Lysozyme-like domain	NULL	NULL	NULL
Dr14737	GO:0005777|GO:0016491|GO:0000166|GO:0055114|GO:0005886	NULL	peroxisomal -dienoyl- reductase	IPR016040|IPR002347	Glucose/ribitol dehydrogenase|NAD(P)-binding domain	NULL	NULL	NULL
Dr14738	GO:0071704|GO:0044238|GO:0097159|GO:0016023|GO:0043167|GO:1901363|GO:0044237|GO:0016020	NULL	probable s-acyltransferase at4g15080-like	IPR001594	Zinc finger, DHHC-type, palmitoyltransferase	GO:0008270	NULL	NULL
Dr14746	NULL	NULL	NULL	NULL	NULL	NULL	NULL	NULL
Dr14747	GO:0008152|GO:0003824	NULL	uncharacterized protein loc100833303	IPR009003	Trypsin-like cysteine/serine peptidase domain	GO:0003824	NULL	NULL
Dr14765	GO:0006950	NULL	tetratricopeptide repeat-containing protein	IPR011990|IPR019734|IPR013026	Tetratricopeptide-like helical|Tetratricopeptide repeat|Tetratricopeptide repeat-containing domain	GO:0005515	NULL	NULL
Dr14798	GO:0048731|GO:0044767	NULL	u4 tri-snrnp-associated protein	IPR005011	SART-1 protein	NULL	NULL	NULL
Dr14799	GO:0016874	NULL	f-box family protein	IPR006652|IPR015916	Kelch repeat type 1|Galactose oxidase, beta-propeller	GO:0005515	NULL	NULL
Dr14807	GO:0005886	NULL	serine threonine-protein phosphatase 6 regulatory subunit 3-like	IPR007587|IPR004038|IPR016024|IPR000530	SIT4 phosphatase-associated protein family|Ribosomal protein L7Ae/L30e/S12e/Gadd45|Ribosomal protein S12e|Armadillo-type fold	GO:0005488|GO:0003735|GO:0005622|GO:0005840|GO:0006412	NULL	NULL
Dr14733	GO:0004643|GO:0006164|GO:0003937|GO:0009409|GO:0009570|GO:0010319|GO:0006144|GO:0042720	EC:2.1.2.3|EC:3.5.4.10	bifunctional purine biosynthesis	IPR002695|IPR011607|IPR016193|IPR024051	AICARFT/IMPCHase bienzyme|Methylglyoxal synthase-like domain|Cytidine deaminase-like|AICAR transformylase domain	GO:0003937|GO:0004643|GO:0006164|GO:0003824	EC:3.5.4.10+2.1.2.3|EC:2.1.2.3	KEGG: 00230+3.5.4.10+2.1.2.3|KEGG: 00670+2.1.2.3|MetaCyc: PWY-6123|MetaCyc: PWY-6124|MetaCyc: PWY-7234|UniPathway: UPA00074|UniPathway: UPA00074
Dr14736	GO:0046914|GO:0003677|GO:0016023|GO:0005524|GO:0004386	NULL	chromatin remodeling complex subunit	IPR000330|IPR001650|IPR023780|IPR019787|IPR009463|IPR009057|IPR027417|IPR016197|IPR011011|IPR013083|IPR001965|IPR000953|IPR014001|IPR017877|IPR019786	SNF2-related|Helicase, C-terminal|Chromo domain|Zinc finger, PHD-finger|Domain of unknown function DUF1087|Homeodomain-like|P-loop containing nucleoside triphosphate hydrolase|Chromo domain-like|Zinc finger, FYVE/PHD-type|Zinc finger, RING/FYVE/PHD-type|Zinc finger, PHD-type|Chromo domain/shadow|Helicase, superfamily 1/2, ATP-binding domain|Myb-like domain|Zinc finger, PHD-type, conserved site	GO:0003677|GO:0005524|GO:0003676|GO:0004386|GO:0005515|GO:0008270	NULL	NULL
Dr14740	GO:0042026|GO:0046872|GO:0044699|GO:0016023|GO:0005524|GO:0016020|GO:0044434	NULL	ru large subunit-binding protein subunit chloroplastic-like	IPR002423|IPR027409|IPR027413|IPR001844|IPR018370	Chaperonin Cpn60/TCP-1|Chaperonin Cpn60|GroEL-like apical domain|GroEL-like equatorial domain|Chaperonin Cpn60, conserved site	GO:0005524|GO:0044267|GO:0005737|GO:0042026|GO:0006457	NULL	NULL
Dr14766	GO:0005507|GO:0005739|GO:0006526|GO:0042742|GO:0003992|GO:0009570|GO:0030170|GO:0000051	EC:2.6.1.11	acetylornithine aminotransferase	IPR005814|IPR015424|IPR015421|IPR015422|IPR004636	Aminotransferase class-III|Pyridoxal phosphate-dependent transferase|Pyridoxal phosphate-dependent transferase, major region, subdomain 1|Pyridoxal phosphate-dependent transferase, major region, subdomain 2|Transaminase, Acetylornithine/Succinylornithine family	GO:0008483|GO:0030170|GO:0003824|GO:0006525	NULL	NULL
Dr14783	GO:0005829|GO:0016021|GO:0005634|GO:0006810|GO:0005886|GO:0005215	NULL	sec14 cytosolic factor-like	IPR001251|IPR011074|IPR001071|IPR009038	CRAL-TRIO domain|CRAL/TRIO, N-terminal domain|Cellular retinaldehyde binding/alpha-tocopherol transport|GOLD	GO:0005215|GO:0005622|GO:0006810|GO:0016021	NULL	NULL
Dr14797	GO:0051287|GO:0055114|GO:0009651|GO:0003862|GO:0009941|GO:0009579|GO:0000287|GO:0009570|GO:0019761|GO:0009098|GO:0009097|GO:0009099	EC:1.1.1.85	3-isopropylmalate dehydrogenase	IPR001804|IPR024084|IPR004429|IPR019818	Isocitrate and isopropylmalate dehydrogenases family|Isopropylmalate dehydrogenase-like domain|Isopropylmalate dehydrogenase|Isocitrate/isopropylmalate dehydrogenase, conserved site	GO:0000287|GO:0016616|GO:0051287|GO:0055114|GO:0003862|GO:0005737|GO:0009098	EC:1.1.1.85	Reactome: REACT_1046|KEGG: 00290+1.1.1.85|UniPathway: UPA00048
Dr14806	NULL	NULL	NULL	IPR002088|IPR025875|IPR001611	Protein prenyltransferase, alpha subunit|Leucine rich repeat 4|Leucine-rich repeat	GO:0008318|GO:0018342|GO:0005515	NULL	NULL
Dr14809	GO:0005886	NULL	btb poz domain-containing protein at1g30440-like	IPR013069|IPR027356|IPR011333|IPR000210	BTB/POZ|NPH3 domain|BTB/POZ fold|BTB/POZ-like	GO:0005515	NULL	UniPathway: UPA00143
Dr14835	NULL	NULL	NULL	IPR028124	Small acidic protein-like domain	NULL	NULL	NULL
Dr14846	NULL	NULL	NULL	IPR003480|IPR023213	Transferase|Chloramphenicol acetyltransferase-like domain	GO:0016747	NULL	NULL
Dr14850	NULL	NULL	NULL	IPR026827|IPR024372|IPR016024|IPR011989	Proteasome component ECM29/Translational activator GCN1|Proteasome stabiliser ECM29|Armadillo-type fold|Armadillo-like helical	GO:0005488	NULL	NULL
Dr14854	GO:0043231	NULL	transcription factor bhlh106	IPR011598	Myc-type, basic helix-loop-helix (bHLH) domain	GO:0046983	NULL	NULL
Dr14842	NULL	NULL	NULL	NULL	NULL	NULL	NULL	NULL
Dr14861	NULL	NULL	NULL	NULL	NULL	NULL	NULL	NULL
Dr14866	NULL	NULL	NULL	IPR002913|IPR023393	START domain|START-like domain	GO:0008289	NULL	NULL
Dr14867	GO:0006468|GO:0005524|GO:0004674|GO:0009069	EC:2.7.11.0	protein kinase	IPR000719|IPR011009|IPR013320|IPR017441|IPR008271	Protein kinase domain|Protein kinase-like domain|Concanavalin A-like lectin/glucanase, subgroup|Protein kinase, ATP binding site|Serine/threonine-protein kinase, active site	GO:0004672|GO:0005524|GO:0006468|GO:0016772|GO:0004674	NULL	NULL
Dr14877	GO:0031965|GO:0006406|GO:0016023|GO:0009733	NULL	suppressor of auxin resistance1 protein	IPR021717|IPR017986|IPR015943	Nucleoporin Nup120/160|WD40-repeat-containing domain|WD40/YVTN repeat-like-containing domain	GO:0005515	NULL	NULL
Dr14883	GO:0008168|GO:0032259	EC:2.1.1.0	protein	IPR013216|IPR022238	Methyltransferase type 11|Uncharacterised protein family, methyltransferase, Williams-Beuren syndrome	GO:0008152|GO:0008168	EC:2.1.1.-	KEGG: 00130+2.1.1.-|KEGG: 00253+2.1.1.-|KEGG: 00270+2.1.1.-|KEGG: 00340+2.1.1.-|KEGG: 00350+2.1.1.-|KEGG: 00360+2.1.1.-|KEGG: 00380+2.1.1.-|KEGG: 00450+2.1.1.-|KEGG: 00522+2.1.1.-|KEGG: 00624+2.1.1.-|KEGG: 00627+2.1.1.-|KEGG: 00860+2.1.1.-|KEGG: 00940+2.1.1.-|KEGG: 00941+2.1.1.-|KEGG: 00942+2.1.1.-|KEGG: 00945+2.1.1.-|KEGG: 00950+2.1.1.-|KEGG: 00981+2.1.1.-
Dr14886	GO:0005886|GO:0009244|GO:0005783|GO:0016772	NULL	abc1 family protein	IPR001466|IPR004147|IPR009330|IPR011009|IPR012338	Beta-lactamase-related|UbiB domain|Lipopolysaccharide core heptose(II) kinase|Protein kinase-like domain|Beta-lactamase/transpeptidase-like	GO:0009244|GO:0016772	EC:2.7.1.-	KEGG: 00540+2.7.1.-|KEGG: 00680+2.7.1.-|KEGG: 00900+2.7.1.-|UniPathway: UPA00958
Dr14907	GO:0003677|GO:0032508|GO:0004003|GO:0005524|GO:0009536|GO:0006310|GO:0005657	NULL	atp-dependent dna helicase	IPR000212|IPR014016|IPR014017|IPR027417	DNA helicase, UvrD/REP type|UvrD-like Helicase, ATP-binding domain|DNA helicase, UvrD-like, C-terminal|P-loop containing nucleoside triphosphate hydrolase	GO:0003677|GO:0004003|GO:0005524|GO:0016787	NULL	NULL
Dr14919	GO:0004672|GO:0006468|GO:0005524|GO:0005739	NULL	aarf domain-containing kinase	IPR004147|IPR011009|IPR000719	UbiB domain|Protein kinase-like domain|Protein kinase domain	GO:0016772|GO:0004672|GO:0005524|GO:0006468	NULL	NULL
Dr14936	GO:0008171	NULL	caffeic acid 3-o-methyltransferase	IPR001077|IPR012967|IPR011991|IPR016461	O-methyltransferase, family 2|Plant methyltransferase dimerisation|Winged helix-turn-helix DNA-binding domain|Caffeate O-methyltransferase (COMT) family	GO:0008171|GO:0046983|GO:0008168	NULL	NULL
Dr14857	NULL	NULL	NULL	NULL	NULL	NULL	NULL	NULL
Dr14859	NULL	NULL	NULL	IPR006869|IPR025757	Domain of unknown function DUF547|Ternary complex factor MIP1, leucine-zipper	NULL	NULL	NULL
Dr14888	NULL	NULL	NULL	IPR008195|IPR012870	Ribosomal protein L34Ae|Protein of unknown function DUF1666	GO:0003735|GO:0005622|GO:0005840|GO:0006412	NULL	NULL
Dr14893	GO:0003677|GO:0006355	NULL	nac domain ipr003441	IPR003441	NAC domain	GO:0003677|GO:0006355	NULL	NULL
Dr14898	GO:0016132|GO:0030176|GO:0009918|GO:0005886|GO:0047598|GO:0055114	EC:1.3.1.21	7-dehydrocholesterol reductase	IPR001171|IPR018083	Ergosterol biosynthesis ERG4/ERG24|Sterol reductase, conserved site	GO:0016020|GO:0016628|GO:0055114	NULL	Reactome: REACT_22258
Dr14914	GO:0005488|GO:0016491|GO:0008152|GO:0009536	NULL	choline monooxygenase	IPR017941|IPR015879	Rieske [2Fe-2S] iron-sulphur domain|Aromatic-ring-hydroxylating dioxygenase, alpha subunit, C-terminal domain	GO:0016491|GO:0051537|GO:0055114|GO:0005506|GO:0016708|GO:0019439	NULL	NULL
Dr14932	GO:0016311|GO:0016791|GO:0005982|GO:0009507|GO:0005739	EC:3.1.3.0	protein tyrosine expressed	IPR014756|IPR000387	Immunoglobulin E-set|Protein-tyrosine/Dual specificity phosphatase	GO:0016311|GO:0016791	NULL	NULL
Dr14937	GO:0009624|GO:0030505|GO:0030504|GO:0055085|GO:0005315|GO:0016021|GO:0009507|GO:0009579|GO:0009416|GO:0006817	NULL	sodium-dependent phosphate transport protein	IPR011701|IPR016196|IPR020846	Major facilitator superfamily|Major facilitator superfamily domain, general substrate transporter|Major facilitator superfamily domain	GO:0016021|GO:0055085	NULL	NULL
Dr14938	GO:0016630|GO:0009706|GO:0005739|GO:0055114|GO:0000166|GO:0015995|GO:0019685	EC:1.3.1.33	ww domain-containing oxidoreductase-like isoform 1	IPR002198|IPR016040|IPR002347	Short-chain dehydrogenase/reductase SDR|Glucose/ribitol dehydrogenase|NAD(P)-binding domain	GO:0008152|GO:0016491	NULL	NULL
Dr14939	GO:0009535	NULL	uncharacterized protein	IPR021562	Protein of unknown function DUF3007	NULL	NULL	NULL
Dr02931	GO:0006468|GO:0004674|GO:0016021|GO:0016023|GO:0005524|GO:0009826|GO:0009664|GO:0004714|GO:0005886|GO:0009069|GO:0007169	EC:2.7.11.0|EC:2.7.10.1	leucine-rich repeat protein kinase-like protein	IPR000719|IPR013210|IPR025875|IPR011009|IPR013320|IPR002290|IPR017441|IPR008271	Protein kinase domain|Leucine-rich repeat-containing N-terminal, type 2|Leucine rich repeat 4|Protein kinase-like domain|Concanavalin A-like lectin/glucanase, subgroup|Serine/threonine- / dual specificity protein kinase, catalytic domain|Protein kinase, ATP binding site|Serine/threonine-protein kinase, active site	GO:0004672|GO:0005524|GO:0006468|GO:0016772|GO:0004674	NULL	NULL
Dr02937	GO:0005802|GO:0016020|GO:0005484|GO:0016192|GO:0006886	NULL	syntaxin 33	IPR006011|IPR000727|IPR010989|IPR006012	Syntaxin, N-terminal domain|Target SNARE coiled-coil domain|t-SNARE|Syntaxin/epimorphin, conserved site	GO:0016020|GO:0005515|GO:0016192|GO:0005484|GO:0006886	NULL	Reactome: REACT_11184
Dr02947	GO:0004693|GO:0008353|GO:0007049|GO:0006468|GO:0005524|GO:0051301|GO:0000074|GO:0009069	EC:2.7.11.22|EC:2.7.11.23	cyclin-dependent kinase e-1	IPR000719|IPR011009|IPR002290|IPR017441|IPR008271	Protein kinase domain|Protein kinase-like domain|Serine/threonine- / dual specificity protein kinase, catalytic domain|Protein kinase, ATP binding site|Serine/threonine-protein kinase, active site	GO:0004672|GO:0005524|GO:0006468|GO:0016772|GO:0004674	NULL	NULL
Dr02949	GO:0046983|GO:0005634	NULL	transcription factor bhlh91	IPR011598	Myc-type, basic helix-loop-helix (bHLH) domain	GO:0046983	NULL	NULL
Dr02950	NULL	NULL	NULL	IPR000313	PWWP domain	NULL	NULL	NULL
Dr02951	GO:0005488	NULL	uncharacterized protein loc100830030	IPR001005|IPR009057|IPR011011|IPR013083|IPR001965|IPR019787|IPR017877|IPR019786	SANT/Myb domain|Homeodomain-like|Zinc finger, FYVE/PHD-type|Zinc finger, RING/FYVE/PHD-type|Zinc finger, PHD-type|Zinc finger, PHD-finger|Myb-like domain|Zinc finger, PHD-type, conserved site	GO:0003682|GO:0003677|GO:0005515|GO:0008270	NULL	NULL
Dr02967	GO:0010584|GO:0047077|GO:0016207|GO:0055114|GO:0000166|GO:0009411|GO:0009805|GO:0009809|GO:0009811	EC:1.13.12.7|EC:6.2.1.12	4-coumarate: ligase	IPR000873|IPR025110|IPR020845	AMP-dependent synthetase/ligase|AMP-binding enzyme C-terminal domain|AMP-binding, conserved site	GO:0003824|GO:0008152	NULL	NULL
Dr02973	NULL	NULL	NULL	NULL	NULL	NULL	NULL	NULL
Dr02980	GO:0044763|GO:0008080|GO:0042967	NULL	gcn5-related n-acetyltransferase family protein	IPR000182|IPR016181	GNAT domain|Acyl-CoA N-acyltransferase	GO:0008080	NULL	NULL
Dr02981	GO:0010541|GO:0016021|GO:0010329|GO:0010540|GO:0010315|GO:0042626|GO:0055085|GO:0006200|GO:0005886|GO:0005524|GO:0005739	NULL	multidrug pheromone mdr abc transporter family	IPR003439|IPR001140|IPR027417|IPR011527|IPR003593|IPR017871	ABC transporter-like|ABC transporter, transmembrane domain|P-loop containing nucleoside triphosphate hydrolase|ABC transporter type 1, transmembrane domain|AAA+ ATPase domain|ABC transporter, conserved site	GO:0005524|GO:0016887|GO:0006810|GO:0016021|GO:0042626|GO:0055085|GO:0000166|GO:0017111	NULL	NULL
Dr02983	GO:0005730|GO:0009880|GO:0004611|GO:0006364|GO:0016905|GO:0051301|GO:0017076|GO:0032040|GO:0009793|GO:0006094|GO:0009069|GO:0016310|GO:0016459	EC:2.7.11.7	transducin beta-like protein 3-like	IPR001680|IPR013934|IPR017986|IPR011047|IPR015943|IPR020472|IPR019775	WD40 repeat|Small-subunit processome, Utp13|G-protein beta WD-40 repeat|WD40-repeat-containing domain|Quinonprotein alcohol dehydrogenase-like superfamily|WD40/YVTN repeat-like-containing domain|WD40 repeat, conserved site	GO:0005515|GO:0006364|GO:0032040	NULL	NULL
Dr02987	GO:0044710|GO:0005488|GO:0016616	EC:1.1.1.0	bifunctional dihydroflavonol 4-reductase flavanone 4-reductase-like	IPR001509|IPR016040	NAD-dependent epimerase/dehydratase|NAD(P)-binding domain	GO:0003824|GO:0044237|GO:0050662	NULL	NULL
Dr02910	GO:0032259|GO:0008168|GO:0009451|GO:0006396	EC:2.1.1.0	trna (guanine-n -)-methyltransferase-like	IPR003358	tRNA (guanine-N-7) methyltransferase	GO:0006400|GO:0008176	NULL	UniPathway: UPA00989
Dr02911	GO:0022900|GO:0010295|GO:0009414|GO:0010114|GO:0016021|GO:0046345|GO:0032940|GO:0009055|GO:0030912|GO:0009737|GO:0020037|GO:0048838|GO:0005789|GO:0050832|GO:0005506|GO:0006118	EC:1.14.13.93	abscisic acid 8 -hydroxylase	IPR001128|IPR002401|IPR017972	Cytochrome P450|Cytochrome P450, E-class, group I|Cytochrome P450, conserved site	GO:0005506|GO:0016705|GO:0020037|GO:0055114	NULL	Reactome: REACT_13433
Dr02912	NULL	NULL	NULL	IPR009606	Protein of unknown function DUF1218	NULL	NULL	NULL
Dr02916	GO:0046872|GO:0004784|GO:0009295|GO:0006801|GO:0009507|GO:0055114|GO:0009411	EC:1.15.1.1	superoxide dismutase	IPR001189|IPR019831|IPR019832	Manganese/iron superoxide dismutase|Manganese/iron superoxide dismutase, N-terminal|Manganese/iron superoxide dismutase, C-terminal	GO:0004784|GO:0006801|GO:0046872|GO:0055114	NULL	MetaCyc: PWY-6854
Dr02920	GO:0005739	NULL	pentatricopeptide repeat-containing protein	IPR002885|IPR011990	Pentatricopeptide repeat|Tetratricopeptide-like helical	GO:0005515	NULL	NULL
Dr02921	NULL	NULL	NULL	IPR006565|IPR019473	Bromodomain transcription factor|Transcription factor TFIID, subunit 8, C-terminal	NULL	NULL	NULL
Dr02924	GO:0004715|GO:0006468|GO:0005524|GO:0004674|GO:0009069	EC:2.7.10.2|EC:2.7.11.0	serine threonine-protein kinase at5g01020-like	IPR001245|IPR011009|IPR000719|IPR017441|IPR008271	Serine-threonine/tyrosine-protein kinase catalytic domain|Protein kinase-like domain|Protein kinase domain|Protein kinase, ATP binding site|Serine/threonine-protein kinase, active site	GO:0004672|GO:0006468|GO:0016772|GO:0005524|GO:0004674	NULL	NULL
Dr02933	GO:0006979|GO:0009543|GO:0020037|GO:0004601|GO:0005634|GO:0009535|GO:0055114|GO:0006804	EC:1.11.1.7	thylakoid lumenal 29 kda chloroplastic-like	IPR002016|IPR010255|IPR002207	Haem peroxidase, plant/fungal/bacterial|Plant ascorbate peroxidase|Haem peroxidase	GO:0004601|GO:0006979|GO:0020037|GO:0055114	NULL	NULL
Dr02948	GO:0006306|GO:0008168	EC:2.1.1.0	chromomethylase 2	IPR001525|IPR023780|IPR001025|IPR016197|IPR000953|IPR018117|IPR023779	C-5 cytosine methyltransferase|Chromo domain|Bromo adjacent homology (BAH) domain|Chromo domain-like|Chromo domain/shadow|DNA methylase, C-5 cytosine-specific, active site|Chromo domain, conserved site	GO:0003677|GO:0006306|GO:0008168	EC:2.1.1.37	KEGG: 00270+2.1.1.37
Dr02952	GO:0043167	NULL	histidine kinase- dna gyrase b- and hsp90-like atpase family protein	IPR024975|IPR003594	Domain of unknown function DUF3883|Histidine kinase-like ATPase, ATP-binding domain	GO:0005524	NULL	NULL
Dr02961	GO:0003723|GO:0008270|GO:0005730|GO:0006364|GO:0008026|GO:0005524	NULL	rna helicase	IPR011545|IPR001650|IPR027417|IPR014001|IPR014014|IPR000629	DNA/RNA helicase, DEAD/DEAH box type, N-terminal|Helicase, C-terminal|P-loop containing nucleoside triphosphate hydrolase|Helicase, superfamily 1/2, ATP-binding domain|RNA helicase, DEAD-box type, Q motif|RNA helicase, ATP-dependent, DEAD-box, conserved site	GO:0003676|GO:0005524|GO:0008026|GO:0004386	NULL	NULL
Dr02969	GO:0004366|GO:0016024|GO:0009570|GO:0006655|GO:0042967	EC:2.3.1.15	glycerol-3-phosphate acyltransferase	IPR002123|IPR023083	Phospholipid/glycerol acyltransferase|Glycerol-3-phosphate O-acyltransferase, alpha helical bundle, N-terminal	GO:0008152|GO:0016746|GO:0004366	EC:2.3.1.15	KEGG: 00561+2.3.1.15|KEGG: 00564+2.3.1.15|MetaCyc: PWY-5667|UniPathway: UPA00557
Dr02975	GO:0006351|GO:0003677	NULL	homeobox-leucine zipper protein roc3	IPR002913	START domain	GO:0008289	NULL	NULL
Dr02976	GO:0016023	NULL	protein	IPR016024|IPR011989	Armadillo-type fold|Armadillo-like helical	GO:0005488	NULL	NULL
Dr02978	GO:0046872|GO:0009536	NULL	ring finger	IPR002867|IPR006575|IPR001841|IPR016135|IPR013083|IPR017907	Zinc finger, C6HC-type|RWD domain|Zinc finger, RING-type|Ubiquitin-conjugating enzyme/RWD-like|Zinc finger, RING/FYVE/PHD-type|Zinc finger, RING-type, conserved site	GO:0008270|GO:0005515	NULL	NULL
Dr02985	GO:0003676|GO:0000166	NULL	rna recognition motif-containing protein	IPR000504|IPR012677	RNA recognition motif domain|Nucleotide-binding, alpha-beta plait	GO:0003676|GO:0000166	NULL	NULL
Dr02990	GO:0044237|GO:0016787|GO:0044238|GO:0043170	NULL	ubiquitin carboxyl-terminal hydrolase	IPR001394|IPR018200	Ubiquitin carboxyl-terminal hydrolases family 2|Peptidase C19, ubiquitin carboxyl-terminal hydrolase 2, conserved site	GO:0004221|GO:0006511	NULL	NULL
Dr02992	GO:0003002|GO:0016023|GO:0009653|GO:0016020|GO:0048513|GO:0044767	NULL	tetraspanin family protein	IPR018499|IPR000301	Tetraspanin/Peripherin|Tetraspanin	GO:0016021	NULL	NULL
Dr02995	GO:0044425	NULL	uncharacterized protein at4g17910-like	IPR009447	GWT1	GO:0005789|GO:0006506|GO:0016021|GO:0016746	EC:2.3.-.-	KEGG: 00231+2.3.-.-|KEGG: 00563+2.3.-.-|UniPathway: UPA00196
Dr02996	NULL	NULL	NULL	NULL	NULL	NULL	NULL	NULL
Dr03022	NULL	NULL	NULL	IPR018996	Inner nuclear membrane protein MAN1	GO:0005639	NULL	NULL
Dr03030	GO:0016020|GO:0009536	NULL	probable dolichyl pyrophosphate glc1man9 c2 alpha- -glucosyltransferase-like	IPR004856	Glycosyl transferase, ALG6/ALG8	GO:0005789|GO:0016758	NULL	Reactome: REACT_17015|UniPathway: UPA00378
Dr03043	GO:0000256|GO:0016023|GO:0071522	NULL	glyoxylate induced protein	IPR013096|IPR011051|IPR014710	Cupin 2, conserved barrel|RmlC-like cupin domain|RmlC-like jelly roll fold	NULL	NULL	NULL
Dr03048	GO:0016301|GO:0000079|GO:0019901	NULL	cyclin-dependent protein	IPR013922|IPR013763|IPR012389	Cyclin PHO80-like|Cyclin-like|Cyclin P/U	GO:0000079|GO:0019901	NULL	NULL
Dr03052	GO:0005856|GO:0006909	NULL	elmo domain-containing protein a-like	IPR006816	Engulfment/cell motility, ELMO	GO:0005856|GO:0006909	NULL	NULL
Dr03012	GO:0046786	NULL	tobamovirus multiplication 2b protein	NULL	NULL	NULL	NULL	NULL
Dr03031	GO:0046961|GO:0008270|GO:0009651|GO:0046933|GO:0005754|GO:0015986|GO:0006119	NULL	atp synthase delta	IPR001469|IPR020546	ATPase, F1 complex, delta/epsilon subunit|ATPase, F1 complex, delta/epsilon subunit, N-terminal	GO:0015986|GO:0045261|GO:0046933|GO:0046961	NULL	NULL
Dr03007	GO:0003824	NULL	protein phosphatase 2c	IPR015655|IPR001932	Protein phosphatase 2C|Protein phosphatase 2C (PP2C)-like domain	GO:0003824	NULL	NULL
Dr03020	GO:0008152|GO:0051213	NULL	s-norcoclaurine synthase 1-like	IPR005123|IPR026992|IPR027443	Oxoglutarate/iron-dependent dioxygenase|Non-haem dioxygenase N-terminal domain|Isopenicillin N synthase-like	GO:0016491|GO:0016706|GO:0055114	NULL	NULL
Dr03106	GO:0045431|GO:0005506|GO:0051555|GO:0055114	EC:1.14.11.23	2-oxoglutarate-fe -dependent oxygenase domain-containing protein	IPR005123|IPR026992|IPR027443|IPR002283	Oxoglutarate/iron-dependent dioxygenase|Non-haem dioxygenase N-terminal domain|Isopenicillin N synthase|Isopenicillin N synthase-like	GO:0016491|GO:0016706|GO:0055114|GO:0005506	NULL	NULL
Dr03044	GO:0016070|GO:0032259|GO:0008168	EC:2.1.1.0	trna rrna methyltransferase family protein	IPR001537|IPR016024	tRNA/rRNA methyltransferase, SpoU|Armadillo-type fold	GO:0003723|GO:0006396|GO:0008173|GO:0005488	NULL	NULL
Dr03110	NULL	NULL	NULL	IPR013520|IPR012337|IPR006055	Exonuclease, RNase T/DNA polymerase III|Ribonuclease H-like domain|Exonuclease	GO:0003676|GO:0004527	NULL	NULL
Dr03120	GO:0006457|GO:0009941|GO:0009570|GO:0016853|GO:0015031	NULL	trigger factor-like	IPR001179|IPR008881|IPR008880|IPR027304|IPR005215	Peptidyl-prolyl cis-trans isomerase, FKBP-type, domain|Trigger factor, ribosome-binding, bacterial|Trigger factor, C-terminal domain|Trigger factor/SurA domain|Trigger factor	GO:0006457|GO:0015031	NULL	NULL
Dr03121	GO:0008937|GO:0046872|GO:0051539|GO:0055114|GO:0009507|GO:0006118	NULL	ferredoxin-thioredoxin reductase	IPR004209|IPR024707	Ferredoxin thioredoxin reductase beta subunit, domain|Ferredoxin-thioredoxin reductase, beta subunit	GO:0008937|GO:0055114	NULL	NULL
Dr03123	GO:0016787|GO:1901363|GO:0097159|GO:0005739	NULL	dead-box atp-dependent rna helicase 22	IPR011545|IPR001650|IPR027417|IPR014001|IPR014014	DNA/RNA helicase, DEAD/DEAH box type, N-terminal|Helicase, C-terminal|P-loop containing nucleoside triphosphate hydrolase|Helicase, superfamily 1/2, ATP-binding domain|RNA helicase, DEAD-box type, Q motif	GO:0003676|GO:0005524|GO:0008026|GO:0004386	NULL	NULL
Dr03126	GO:0097159|GO:1901363	NULL	nucleic acid binding protein	IPR012677|IPR000504	Nucleotide-binding, alpha-beta plait|RNA recognition motif domain	GO:0000166|GO:0003676	NULL	NULL
Dr03127	GO:0005739	NULL	nucleic acid binding protein	IPR007263	Putative thiol-disulphide oxidoreductase DCC	NULL	NULL	NULL
Dr03058	NULL	NULL	NULL	IPR016135|IPR013083|IPR001841|IPR006575	Ubiquitin-conjugating enzyme/RWD-like|Zinc finger, RING/FYVE/PHD-type|Zinc finger, RING-type|RWD domain	GO:0005515|GO:0008270	NULL	NULL
Dr03035	GO:0006996|GO:0043234|GO:0015630|GO:0044444|GO:0044430	NULL	65-kda microtubule-associated protein 3-like	IPR007145	Microtubule-associated protein, MAP65/Ase1/PRC1	GO:0000226|GO:0000910|GO:0008017	NULL	NULL
Dr03091	GO:0016787	NULL	abhydrolase domain-containing protein fam108c1-like	NULL	NULL	NULL	NULL	NULL
Dr03094	NULL	NULL	NULL	NULL	NULL	NULL	NULL	NULL
Dr03097	GO:0016117|GO:0016705|GO:0009507	NULL	lycopene beta epsilon cyclase protein	NULL	NULL	NULL	NULL	NULL
Dr03039	GO:0006457|GO:0006979|GO:0000014|GO:0090305|GO:0009314|GO:0003677|GO:0000724|GO:0006289|GO:0000413|GO:0003755|GO:0006308	EC:5.2.1.8	dna repair endonuclease uvh1	IPR006166|IPR010994|IPR011335|IPR020819	ERCC4 domain|RuvA domain 2-like|Restriction endonuclease type II-like|DNA repair nuclease, XPF-type/Helicase	GO:0003677|GO:0004518|GO:0006259	NULL	Reactome: REACT_216
Dr03112	GO:0051287|GO:0009561|GO:0055114|GO:0005739|GO:0004617|GO:0005524|GO:0016597|GO:0009507|GO:0016020|GO:0006564|GO:0006544|GO:0006566	EC:1.1.1.95	d-3-phosphoglycerate chloroplastic-like	IPR006236|IPR006139|IPR002912|IPR006140|IPR016040|IPR015878	D-3-phosphoglycerate dehydrogenase|D-isomer specific 2-hydroxyacid dehydrogenase, catalytic domain|ACT domain|D-isomer specific 2-hydroxyacid dehydrogenase, NAD-binding|NAD(P)-binding domain|S-adenosyl-L-homocysteine hydrolase, NAD binding domain	GO:0004617|GO:0006564|GO:0055114|GO:0008152|GO:0016616|GO:0051287|GO:0016597|GO:0048037	EC:1.1.1.95|EC:3.3.1.1	KEGG: 00260+1.1.1.95|KEGG: 00680+1.1.1.95|UniPathway: UPA00135|KEGG: 00270+3.3.1.1|MetaCyc: PWY-5041|UniPathway: UPA00314
Dr03113	NULL	NULL	NULL	NULL	NULL	NULL	NULL	NULL
Dr03114	GO:0004553|GO:0009941|GO:0005975|GO:0019031|GO:0005739	EC:3.2.1.0	protein nlrc3-like	IPR003590	Leucine-rich repeat, ribonuclease inhibitor subtype	NULL	NULL	NULL
Dr03115	GO:0006506|GO:0005739|GO:0016740|GO:0005789	NULL	gpi ethanolamine phosphate transferase 1-like	IPR007070|IPR024956|IPR017852|IPR017850|IPR017849	GPI ethanolamine phosphate transferase 1|tRNAHis guanylyltransferase catalytic domain|GPI ethanolamine phosphate transferase 1, C-terminal|Alkaline-phosphatase-like, core domain|Alkaline phosphatase-like, alpha/beta/alpha	GO:0005789|GO:0006506|GO:0016740|GO:0000287|GO:0006400|GO:0008193|GO:0003824|GO:0008152	EC:2.-.-.-	KEGG: 00231+2.-.-.-|UniPathway: UPA00196
Dr03054	GO:0016023|GO:0006468|GO:0005524|GO:0004674|GO:0009069	EC:2.7.11.0	kinase like protein	IPR000719|IPR011009|IPR002290|IPR008271	Protein kinase domain|Protein kinase-like domain|Serine/threonine- / dual specificity protein kinase, catalytic domain|Serine/threonine-protein kinase, active site	GO:0004672|GO:0005524|GO:0006468|GO:0016772|GO:0004674	NULL	NULL
Dr03056	NULL	NULL	NULL	NULL	NULL	NULL	NULL	NULL
Dr03073	GO:0046872|GO:0048015|GO:0004842|GO:0042787|GO:0010152|GO:0005737|GO:0019722|GO:0005634	EC:6.3.2.19	c2 and gram domain-containing protein at1g03370-like	IPR000008|IPR004182	C2 domain|GRAM domain	GO:0005515	NULL	NULL
Dr03095	GO:1901700|GO:0010033|GO:0009719|GO:0008270	NULL	zinc finger an1 domain-containing stress-associated protein 12	IPR000058	Zinc finger, AN1-type	GO:0008270	NULL	NULL
Dr03125	GO:0008270	NULL	transcription factor lim1	IPR001781	Zinc finger, LIM-type	GO:0008270	NULL	NULL
Dr03128	GO:0009793|GO:0005739|GO:0009536	NULL	ankyrin repeat domain-containing protein emb506	IPR020683|IPR002110	Ankyrin repeat-containing domain|Ankyrin repeat	GO:0005515	NULL	NULL
Dr03149	GO:0071277|GO:0090333|GO:0009535|GO:0005739	NULL	extracellular calcium sensing receptor	IPR001763	Rhodanese-like domain	NULL	NULL	NULL
Dr03164	NULL	NULL	NULL	IPR008985	Concanavalin A-like lectin/glucanases superfamily	NULL	NULL	NULL
Dr03165	GO:0009987|GO:0050896|GO:0009536|GO:0016740	NULL	dna repair protein rev1	IPR001357|IPR001126|IPR017956|IPR024728|IPR017961|IPR017963	BRCT domain|DNA-repair protein, UmuC-like|AT hook, DNA-binding motif|DNA polymerase type-Y, HhH motif|DNA polymerase, Y-family, little finger domain|DNA-repair protein, UmuC-like, N-terminal	GO:0003684|GO:0003887|GO:0006281|GO:0003677	EC:2.7.7.7	KEGG: 00230+2.7.7.7|KEGG: 00240+2.7.7.7
Dr03170	NULL	NULL	NULL	IPR001810	F-box domain	GO:0005515	NULL	NULL
Dr03181	GO:0004553|GO:0005975|GO:0005739	EC:3.2.1.0	beta- -glucanase	IPR000490|IPR017853|IPR013781	Glycoside hydrolase, family 17|Glycoside hydrolase, superfamily|Glycoside hydrolase, catalytic domain	GO:0004553|GO:0005975|GO:0003824	EC:3.2.1.39	KEGG: 00500+3.2.1.39
Dr03188	GO:0071704|GO:0044249|GO:0044710|GO:0010584|GO:0015645|GO:0016491|GO:0000166	NULL	acyl:coa ligase	IPR000873|IPR025110|IPR020845	AMP-dependent synthetase/ligase|AMP-binding enzyme C-terminal domain|AMP-binding, conserved site	GO:0003824|GO:0008152	NULL	NULL
Dr03193	GO:0030259|GO:0030246|GO:0016758	EC:2.4.1.0	beta- -n-acetylglucosaminyltransferase	IPR007235	Glycosyl transferase, family 28, C-terminal	GO:0005975|GO:0016758|GO:0030246|GO:0030259	EC:2.4.1.227	KEGG: 00550+2.4.1.227|MetaCyc: PWY-5265|MetaCyc: PWY-6385|MetaCyc: PWY-6470|MetaCyc: PWY-6471|UniPathway: UPA00219
Dr03194	NULL	NULL	NULL	NULL	NULL	NULL	NULL	NULL
Dr03134	GO:0005524|GO:0000186|GO:0004709|GO:0007178|GO:0009069	EC:2.7.11.25	serine threonine-protein kinase pbs1-like	IPR000719|IPR011009|IPR013320|IPR002290|IPR017441|IPR008271	Protein kinase domain|Protein kinase-like domain|Concanavalin A-like lectin/glucanase, subgroup|Serine/threonine- / dual specificity protein kinase, catalytic domain|Protein kinase, ATP binding site|Serine/threonine-protein kinase, active site	GO:0004672|GO:0005524|GO:0006468|GO:0016772|GO:0004674	NULL	NULL
Dr03143	GO:0044464	NULL	strictosidine synthase family protein	IPR018119|IPR011042	Strictosidine synthase, conserved region|Six-bladed beta-propeller, TolB-like	GO:0009058|GO:0016844	NULL	NULL
Dr03201	GO:0010288|GO:0005975|GO:0004553|GO:0046686	EC:3.2.1.0	#NAME?	IPR006840|IPR013024	ChaC-like protein|Butirosin biosynthesis, BtrG-like	NULL	NULL	NULL
Dr03286	GO:0016787|GO:0005739	NULL	haloacid dehalogenase-like hydrolase domain-containing protein 1a	IPR023214|IPR006439	HAD-like domain|HAD hydrolase, subfamily IA	GO:0008152|GO:0016787	NULL	NULL
Dr03220	NULL	NULL	NULL	IPR011016|IPR013083	Zinc finger, RING-CH-type|Zinc finger, RING/FYVE/PHD-type	GO:0008270	EC:6.3.2.-	KEGG: 00300+6.3.2.-|KEGG: 00380+6.3.2.-|UniPathway: UPA00143
Dr03294	GO:0003677|GO:0003682|GO:0000785	NULL	myb domain protein 36	IPR001005|IPR009057|IPR017930	SANT/Myb domain|Homeodomain-like|Myb domain	GO:0003682|GO:0003677	NULL	NULL
Dr03300	NULL	NULL	NULL	IPR001378|IPR023370	Uncharacterised domain UPF0066|Uncharacterised domain UPF0066, YaeB-like domain	NULL	NULL	NULL
Dr03229	GO:0016023	NULL	probable inactive purple acid phosphatase 28-like	IPR004843|IPR011230	Phosphoesterase domain|Phosphoesterase At2g46880	GO:0016787	NULL	NULL
Dr03232	GO:0050789|GO:0009536|GO:0007275	NULL	serrate rna effector molecule-like	IPR007042|IPR021933|IPR007087	Arsenite-resistance protein 2|Protein of unknown function DUF3546|Zinc finger, C2H2	GO:0046872	NULL	NULL
Dr03203	GO:0009617|GO:0009507	NULL	aig2-like protein	IPR009288|IPR013024	AIG2-like|Butirosin biosynthesis, BtrG-like	NULL	NULL	NULL
Dr03206	GO:0051082|GO:0031072|GO:0009536	NULL	chaperone protein dnaj-related protein	NULL	NULL	NULL	NULL	NULL
Dr03267	NULL	NULL	NULL	IPR007720	N-acetylglucosaminyl transferase component	GO:0006506|GO:0016021|GO:0017176	NULL	UniPathway: UPA00196
Dr03279	NULL	NULL	NULL	IPR012866	Protein of unknown function DUF1644	NULL	NULL	NULL
Dr03168	GO:0017111|GO:0005739|GO:0000166	EC:3.6.1.15	aaa-type atpase family protein	IPR003959|IPR027417|IPR003593|IPR003960	ATPase, AAA-type, core|P-loop containing nucleoside triphosphate hydrolase|AAA+ ATPase domain|ATPase, AAA-type, conserved site	GO:0005524|GO:0000166|GO:0017111	NULL	NULL
Dr03169	GO:0046686|GO:0003723|GO:0000166	NULL	poly -binding protein	IPR000504|IPR000644|IPR002004|IPR012677|IPR003954|IPR006515	RNA recognition motif domain|CBS domain|Polyadenylate-binding protein/Hyperplastic disc protein|Nucleotide-binding, alpha-beta plait|RNA recognition motif domain, eukaryote|Polyadenylate binding protein, human types 1, 2, 3, 4	GO:0003676|GO:0030554|GO:0003723|GO:0000166	NULL	NULL
Dr03212	GO:0009555|GO:0010491|GO:0046398|GO:0046686|GO:0047338|GO:0017103|GO:0047350|GO:0052573|GO:0033356|GO:0006011|GO:0003983|GO:0005982|GO:0005985|GO:0006012	EC:2.7.7.11|EC:2.7.7.10|EC:2.7.7.44|EC:2.7.7.9	udp-sugar pyrophosphorylase	IPR002618	UTP--glucose-1-phosphate uridylyltransferase	GO:0008152|GO:0016779	NULL	NULL
Dr03180	GO:0006950	NULL	enhanced disease susceptibility 1	IPR002921	Lipase, class 3	GO:0004806|GO:0006629	NULL	Reactome: REACT_14797|Reactome: REACT_604
Dr03183	NULL	NULL	NULL	IPR002035|IPR001841|IPR013083	von Willebrand factor, type A|Zinc finger, RING-type|Zinc finger, RING/FYVE/PHD-type	GO:0005515|GO:0008270	NULL	NULL
Dr03192	GO:0005737|GO:0005634	NULL	regulatory particle non-atpase 13	IPR006773	26S proteasome complex ubiquitin receptor, subunit Rpn13	GO:0005634|GO:0005737	NULL	NULL
Dr03198	GO:0009536	NULL	pentatricopeptide repeat protein	IPR002885	Pentatricopeptide repeat	NULL	NULL	NULL
Dr03202	GO:0003676|GO:0008026|GO:0005524|GO:0010093	NULL	superkiller viralicidic activity 2-like 2-like	IPR011545|IPR001650|IPR012961|IPR025696|IPR027417|IPR014001|IPR016438	DNA/RNA helicase, DEAD/DEAH box type, N-terminal|Helicase, C-terminal|DSH, C-terminal|rRNA-processing arch domain|P-loop containing nucleoside triphosphate hydrolase|Helicase, superfamily 1/2, ATP-binding domain|RNA helicase, ATP-dependent, SK12/DOB1	GO:0003676|GO:0005524|GO:0008026|GO:0004386|GO:0016818|GO:0016817	NULL	NULL
Dr03205	NULL	NULL	NULL	NULL	NULL	NULL	NULL	NULL
Dr03218	GO:0005840|GO:0003735|GO:0006412|GO:0009536|GO:0005739|GO:0042254	NULL	30s ribosomal protein s16	IPR000307|IPR023803	Ribosomal protein S16|Ribosomal protein S16 domain	GO:0003735|GO:0005622|GO:0005840|GO:0006412	NULL	NULL
Dr03228	NULL	NULL	NULL	IPR011598	Myc-type, basic helix-loop-helix (bHLH) domain	GO:0046983	NULL	NULL
Dr03231	GO:0009536	NULL	protein	IPR019155	Uncharacterised protein family FPL	NULL	NULL	NULL
Dr03247	NULL	NULL	NULL	IPR008590	Protein of unknown function DUF872, transmembrane	NULL	NULL	NULL
Dr03253	NULL	NULL	NULL	IPR012340|IPR000424	Nucleic acid-binding, OB-fold|Primosome PriB/single-strand DNA-binding	GO:0003697	NULL	NULL
Dr03254	GO:0050660|GO:0016491|GO:0055114|GO:0005886	NULL	apoptosis-inducing factor homolog a-like	IPR001327|IPR023753|IPR013027	Pyridine nucleotide-disulphide oxidoreductase, NAD-binding domain|Pyridine nucleotide-disulphide oxidoreductase, FAD/NAD(P)-binding domain|FAD-dependent pyridine nucleotide-disulphide oxidoreductase	GO:0016491|GO:0050660|GO:0055114	NULL	NULL
Dr03217	NULL	NULL	NULL	NULL	NULL	NULL	NULL	NULL
Dr03259	GO:0048731|GO:0010340|GO:0032259|GO:0016023|GO:0044425|GO:0005783	NULL	protein-s-isoprenylcysteine o-methyltransferase b	IPR007269|IPR025770	Isoprenylcysteine carboxyl methyltransferase|Protein-S-isoprenylcysteine O-methyltransferase	GO:0004671|GO:0006481|GO:0016021|GO:0005783	EC:2.1.1.100	KEGG: 00900+2.1.1.100
Dr03268	NULL	NULL	NULL	NULL	NULL	NULL	NULL	NULL
Dr03219	NULL	NULL	NULL	IPR000195	Rab-GTPase-TBC domain	GO:0005097|GO:0032313	NULL	NULL
Dr03289	GO:0006468|GO:0004674|GO:0009536|GO:0005524|GO:0009069	EC:2.7.11.0	protein	IPR000270|IPR001245|IPR011009|IPR002290|IPR000719|IPR017441|IPR008271	Phox/Bem1p|Serine-threonine/tyrosine-protein kinase catalytic domain|Protein kinase-like domain|Serine/threonine- / dual specificity protein kinase, catalytic domain|Protein kinase domain|Protein kinase, ATP binding site|Serine/threonine-protein kinase, active site	GO:0005515|GO:0004672|GO:0006468|GO:0016772|GO:0005524|GO:0004674	NULL	NULL
Dr03301	GO:0005634|GO:0005829|GO:0005886	NULL	protein cypro4-like	IPR013863|IPR015943	Vacuolar import/degradation, Vid27-related|WD40/YVTN repeat-like-containing domain	GO:0005515	NULL	NULL
Dr03307	GO:0046872|GO:0044237|GO:0003824|GO:0005739	NULL	ankyrin repeat-rich protein	IPR020683|IPR013083|IPR002110|IPR001841|IPR017907	Ankyrin repeat-containing domain|Ankyrin repeat|Zinc finger, RING/FYVE/PHD-type|Zinc finger, RING-type|Zinc finger, RING-type, conserved site	GO:0005515|GO:0008270	NULL	NULL
Dr03308	GO:0009507|GO:0016740	NULL	gcn5-related n-acetyltransferase family protein	IPR016181	Acyl-CoA N-acyltransferase	NULL	NULL	NULL
Dr03326	GO:0044260|GO:0005488|GO:0044238	NULL	dna repair protein rad23-1	IPR000626|IPR000449|IPR015360|IPR009060|IPR004806|IPR015940|IPR006636|IPR019955	Ubiquitin domain|Ubiquitin-associated domain/translation elongation factor EF-Ts, N-terminal|XPC-binding domain|UV excision repair protein Rad23|UBA-like|Ubiquitin-associated/translation elongation factor EF1B, N-terminal, eukaryote|Heat shock chaperonin-binding|Ubiquitin supergroup	GO:0005515|GO:0003684|GO:0006289|GO:0043161|GO:0005634	NULL	NULL
Dr03327	GO:0051536|GO:0009941|GO:0004497|GO:0015031|GO:0016020	NULL	rieske iron-sulfur protein tic55	IPR017941|IPR013626	Rieske [2Fe-2S] iron-sulphur domain|Pheophorbide a oxygenase	GO:0016491|GO:0051537|GO:0055114|GO:0010277	NULL	NULL
Dr03333	GO:0016020	NULL	integral membrane transporter family protein	IPR004324|IPR016196	Biopterin transport-related protein BT1|Major facilitator superfamily domain, general substrate transporter	NULL	NULL	NULL
Dr03335	NULL	NULL	NULL	NULL	NULL	NULL	NULL	NULL
Dr03338	GO:0003676|GO:0005739	NULL	u2 snrnp-associated surp motif-containing	IPR000504|IPR000061|IPR013170|IPR008942|IPR012677|IPR006569	RNA recognition motif domain|SWAP/Surp|mRNA splicing factor, Cwf21|ENTH/VHS|Nucleotide-binding, alpha-beta plait|CID domain	GO:0003676|GO:0003723|GO:0006396|GO:0000166	NULL	NULL
Dr03340	GO:0016491|GO:0016023|GO:0016310|GO:0004672|GO:0016020|GO:0000166	NULL	leucine-rich repeat receptor-like serine threonine-protein kinase at2g24130-like	IPR000719|IPR001611|IPR013210|IPR025875|IPR011009|IPR013320|IPR002290|IPR003591|IPR017441|IPR008271	Protein kinase domain|Leucine-rich repeat|Leucine-rich repeat-containing N-terminal, type 2|Leucine rich repeat 4|Protein kinase-like domain|Concanavalin A-like lectin/glucanase, subgroup|Serine/threonine- / dual specificity protein kinase, catalytic domain|Leucine-rich repeat, typical subtype|Protein kinase, ATP binding site|Serine/threonine-protein kinase, active site	GO:0004672|GO:0005524|GO:0006468|GO:0005515|GO:0016772|GO:0004674	NULL	NULL
Dr03343	NULL	NULL	NULL	IPR007573	Protein of unknown function DUF566	NULL	NULL	NULL
Dr03355	GO:0047172|GO:0009809|GO:0047205|GO:0009963|GO:0010252|GO:0042967|GO:0009805|GO:0009811	EC:2.3.1.133|EC:2.3.1.99	hydroxycinnamoyl transferase	IPR003480|IPR023213	Transferase|Chloramphenicol acetyltransferase-like domain	GO:0016747	NULL	NULL
Dr03358	GO:0005739|GO:0009536	NULL	protein	IPR002885|IPR011990	Pentatricopeptide repeat|Tetratricopeptide-like helical	GO:0005515	NULL	NULL
Dr03363	GO:0065007|GO:0048827|GO:0044464|GO:0009908|GO:0051179	NULL	btb poz domain-containing protein npy1-like	IPR013069|IPR027356|IPR011333|IPR000210	BTB/POZ|NPH3 domain|BTB/POZ fold|BTB/POZ-like	GO:0005515	NULL	UniPathway: UPA00143
Dr03375	GO:0005885|GO:0034314	NULL	actin-related protein c3	IPR007204	ARP2/3 complex, 21kDa subunit (p21-Arc)	GO:0005856|GO:0005885|GO:0030833|GO:0034314	NULL	NULL
Dr03321	GO:0046872|GO:0005739|GO:0008253	EC:3.1.3.5	cytosolic purine 5-	IPR008380|IPR023214|IPR016695	HAD-superfamily hydrolase, subfamily IG, 5'-nucleotidase|HAD-like domain|Purine 5'-nucleotidase	NULL	NULL	NULL
Dr03322	GO:0000045|GO:0000421|GO:0034045|GO:0080025|GO:0005829|GO:0032266	NULL	autophagy-related protein 18-like	IPR001680|IPR017986|IPR015943	WD40 repeat|WD40-repeat-containing domain|WD40/YVTN repeat-like-containing domain	GO:0005515	NULL	NULL
Dr03328	GO:0008152	NULL	histone-lysine n-methyltransferase ashr3	IPR001214|IPR003616|IPR025787	SET domain|Post-SET domain|Histone-lysine N-methyltransferase, SET2, plant	GO:0005515	EC:2.1.1.43	KEGG: 00310+2.1.1.43
Dr03329	GO:0009536|GO:0016020	NULL	probable serine incorporator-like	IPR005016	TMS membrane protein/tumour differentially expressed protein	GO:0016020	NULL	NULL
Dr03336	GO:0016301|GO:0016310	NULL	uncharacterized protein	NULL	NULL	NULL	NULL	NULL
Dr03345	GO:0008270|GO:0016021|GO:0030244|GO:0009834|GO:0010400|GO:0016760|GO:0016761|GO:0009507|GO:0005886|GO:0005982|GO:0005985|GO:0006011	EC:2.4.1.12|EC:2.4.1.29	cellulose synthase	IPR005150|IPR027934|IPR013083|IPR001841	Cellulose synthase|Cellulose synthase, RING-type zinc finger|Zinc finger, RING/FYVE/PHD-type|Zinc finger, RING-type	GO:0016020|GO:0016760|GO:0030244|GO:0005515|GO:0008270	EC:2.4.1.12	KEGG: 00500+2.4.1.12|MetaCyc: PWY-1001|UniPathway: UPA00695
Dr03346	GO:0006412|GO:0003723|GO:0051704|GO:0044424	NULL	eukaryotic initiation factor iso-4f subunit p82-34-like	IPR003891|IPR003890|IPR016024|IPR016021	Initiation factor eIF-4 gamma, MA3|MIF4G-like, type 3|Armadillo-type fold|MIF4-like, type 1/2/3	GO:0003723|GO:0005515|GO:0005488	NULL	NULL
Dr03357	NULL	NULL	NULL	NULL	NULL	NULL	NULL	NULL
Dr03359	GO:0004185|GO:0005615|GO:0006508|GO:0016023|GO:0009742	EC:3.4.16.0	protein	IPR001563|IPR018202	Peptidase S10, serine carboxypeptidase|Peptidase S10, serine carboxypeptidase, active site	GO:0004185|GO:0006508	NULL	NULL
Dr03367	GO:0004129|GO:0005739|GO:0006123|GO:0015992|GO:0045277	EC:1.9.3.1	cytochrome c subunit vib family protein	IPR003213	Cytochrome c oxidase, subunit VIb	GO:0004129|GO:0005739	NULL	NULL
Dr03373	NULL	NULL	NULL	IPR016024|IPR011989|IPR000225	Armadillo-type fold|Armadillo-like helical|Armadillo	GO:0005488|GO:0005515	NULL	NULL
Dr03379	NULL	NULL	NULL	NULL	NULL	NULL	NULL	NULL
Dr03380	GO:0016301	NULL	phosphoinositide 3-kinase regulatory subunit 4-like	IPR000719|IPR001680|IPR000357|IPR016024|IPR017986|IPR011009|IPR011989|IPR015943|IPR002290|IPR021133|IPR008271	Protein kinase domain|WD40 repeat|HEAT|Armadillo-type fold|WD40-repeat-containing domain|Protein kinase-like domain|Armadillo-like helical|WD40/YVTN repeat-like-containing domain|Serine/threonine- / dual specificity protein kinase, catalytic domain|HEAT, type 2|Serine/threonine-protein kinase, active site	GO:0004672|GO:0005524|GO:0006468|GO:0005515|GO:0005488|GO:0016772|GO:0004674	NULL	NULL
Dr03383	GO:0005509	NULL	dcn1-like protein 4	IPR014764|IPR005176|IPR011992	Defective-in-cullin neddylation protein|Potentiating neddylation domain|EF-hand domain pair	GO:0005509	NULL	NULL
Dr03387	GO:0022891|GO:0016021|GO:0005886|GO:0055085|GO:0008643	NULL	hexose transporter	IPR005828|IPR016196|IPR003663|IPR020846|IPR005829	General substrate transporter|Sugar/inositol transporter|Major facilitator superfamily domain, general substrate transporter|Major facilitator superfamily domain|Sugar transporter, conserved site	GO:0016021|GO:0022857|GO:0055085|GO:0016020|GO:0022891|GO:0005215|GO:0006810	NULL	Reactome: REACT_15518
Dr03399	GO:0009508|GO:0009570	NULL	cobw domain-containing protein 2-like isoform 2	IPR003495|IPR011629|IPR027417	CobW/HypB/UreG domain|Cobalamin (vitamin B12) biosynthesis CobW-like, C-terminal|P-loop containing nucleoside triphosphate hydrolase	NULL	NULL	NULL
Dr03400	GO:0016020|GO:0016023|GO:0009505|GO:0004566|GO:0005982|GO:0005985|GO:0006027|GO:0015994	EC:3.2.1.31	heparanase-like protein 3-like	IPR005199|IPR017853|IPR013781	Glycoside hydrolase, family 79|Glycoside hydrolase, superfamily|Glycoside hydrolase, catalytic domain	GO:0016020|GO:0016798|GO:0003824|GO:0005975	NULL	NULL
Dr03404	GO:0005515|GO:0006950|GO:0043167|GO:0009507	NULL	molecular chaperone hsp40 -like protein	IPR001623|IPR001305|IPR002939|IPR008971|IPR012724	DnaJ domain|Heat shock protein DnaJ, cysteine-rich domain|Chaperone DnaJ, C-terminal|HSP40/DnaJ peptide-binding|Chaperone DnaJ	GO:0031072|GO:0051082|GO:0006457|GO:0005524|GO:0009408	NULL	NULL
Dr03405	GO:0005681|GO:0016023|GO:0000398|GO:0009507|GO:0016020	NULL	pre-mrna-processing-splicing factor	IPR027652|IPR012591|IPR012592|IPR019580|IPR019581|IPR019582|IPR012337	Pre-mRNA-processing-splicing factor 8|PRO8NT domain|PROCN domain|Pre-mRNA-processing-splicing factor 8, U6-snRNA-binding|Pre-mRNA-processing-splicing factor 8, U5-snRNA-binding|RNA recognition motif, spliceosomal PrP8|Ribonuclease H-like domain	GO:0000398|GO:0005681|GO:0017070|GO:0030623|GO:0003723|GO:0003676	NULL	NULL
Dr03407	NULL	NULL	NULL	IPR005061	Domain of unknown function DUF292, eukaryotic	NULL	NULL	NULL
Dr03408	GO:0009411|GO:0010332|GO:0090305|GO:0043231|GO:0006259|GO:0007049|GO:0003677|GO:0004518|GO:0009644	NULL	essential meiotic endonuclease 1a	IPR006166	ERCC4 domain	GO:0003677|GO:0004518	NULL	NULL
Dr03413	GO:0070652|GO:0051225	NULL	haus augmin-like complex subunit 3-like	IPR026206	HAUS augmin-like complex subunit 3	GO:0051225|GO:0070652	NULL	NULL
Dr03420	GO:0006120|GO:0006979|GO:0008137|GO:0005747|GO:0051537|GO:0008270|GO:0006744|GO:0006814|GO:0015992	EC:1.6.5.3	protein	IPR002023|IPR012336	NADH-quinone oxidoreductase subunit E like|Thioredoxin-like fold	GO:0016491|GO:0055114	NULL	NULL
Dr03398	NULL	NULL	NULL	IPR006553|IPR001611	Leucine-rich repeat, cysteine-containing subtype|Leucine-rich repeat	GO:0005515	NULL	NULL
Dr03401	GO:0016023|GO:0016020	NULL	uncharacterized vacuolar membrane protein yml018c-like	IPR000620	Drug/metabolite transporter	GO:0016020	NULL	NULL
Dr03389	GO:0004582|GO:0000136	EC:2.4.1.83	dolichol-phosphate mannosyltransferase	IPR001173	Glycosyl transferase, family 2	NULL	NULL	NULL
Dr03414	GO:0003964|GO:0006278|GO:0003723|GO:0005634|GO:0009536	EC:2.7.7.49	protein	NULL	NULL	NULL	NULL	NULL
Dr03434	GO:0006950	NULL	at1g04190	IPR013105|IPR011990|IPR019734|IPR013026	Tetratricopeptide TPR2|Tetratricopeptide-like helical|Tetratricopeptide repeat|Tetratricopeptide repeat-containing domain	GO:0005515	NULL	NULL
Dr03447	GO:0006353|GO:0003723|GO:0009507|GO:0006355	NULL	antitermination domain-containing protein	IPR011605|IPR006027	NusB antitermination factor|NusB/RsmB/TIM44	GO:0006353|GO:0003723|GO:0006355	NULL	NULL
Dr03453	GO:0009536|GO:0016020	NULL	uncharacterized protein	IPR019358	Transmembrane protein 194	NULL	NULL	NULL
Dr03454	GO:0009416|GO:0010027|GO:0004222|GO:0006508|GO:0009658|GO:0009959|GO:0010207|GO:0009723|GO:0009507|GO:0048564|GO:0016020	EC:3.4.24.0	protein	IPR008915	Peptidase M50	GO:0004222|GO:0006508	NULL	NULL
Dr03455	GO:0016023|GO:0008152|GO:0016020|GO:0016772	NULL	leucine-rich repeat protein kinase-like protein	IPR000719|IPR011009|IPR013320	Protein kinase domain|Protein kinase-like domain|Concanavalin A-like lectin/glucanase, subgroup	GO:0004672|GO:0005524|GO:0006468|GO:0016772	NULL	NULL
Dr03392	NULL	NULL	NULL	IPR008709	Neurochondrin	NULL	NULL	NULL
Dr03393	GO:0016023|GO:0005886	NULL	uncharacterized protein	NULL	NULL	NULL	NULL	NULL
Dr03429	NULL	NULL	NULL	IPR019142	Dymeclin	NULL	NULL	NULL
Dr03503	GO:0042254|GO:0005634	NULL	pescadillo-like protein	IPR001357|IPR010613	BRCT domain|Pescadillo	GO:0005730|GO:0042254	NULL	NULL
Dr03510	NULL	NULL	NULL	IPR004864	Late embryogenesis abundant protein, LEA-14	NULL	NULL	NULL
Dr03518	GO:0005643|GO:0005618|GO:0008565|GO:0006886	NULL	ran-binding protein	IPR000357|IPR016024|IPR011989|IPR021133|IPR001494	HEAT|Armadillo-type fold|Armadillo-like helical|HEAT, type 2|Importin-beta, N-terminal domain	GO:0005515|GO:0005488|GO:0006886|GO:0008536	NULL	NULL
Dr03520	NULL	NULL	NULL	IPR010369	Protein of unknown function DUF966	NULL	NULL	NULL
Dr03529	GO:0016021|GO:0051996|GO:0004310|GO:0006694|GO:0016114	EC:2.5.1.21	squalene synthase 2	IPR002060|IPR008949|IPR006449|IPR019845	Squalene/phytoene synthase|Terpenoid synthase|Farnesyl-diphosphate farnesyltransferase|Squalene/phytoene synthase, conserved site	GO:0009058|GO:0016740|GO:0004310|GO:0008610|GO:0016021|GO:0016765	EC:2.5.1.21	KEGG: 00909+2.5.1.21|UniPathway: UPA00767
Dr03530	GO:0044464	NULL	exocyst complex component 84b	IPR016159	Cullin repeat-like-containing domain	NULL	NULL	NULL
Dr03533	GO:0016023	NULL	thaumatin-like protein	IPR001938	Thaumatin	NULL	NULL	NULL
Dr03537	GO:0016021|GO:0016192|GO:0009507|GO:0005886	NULL	vesicle-associated membrane synaptobrevin 7b	IPR001388|IPR010908|IPR011012	Synaptobrevin|Longin domain|Longin-like domain	GO:0016021|GO:0016192|GO:0006810	NULL	NULL
Dr03541	GO:0016023	NULL	proline-rich family protein	IPR019007	WW domain binding protein 11	GO:0006396	NULL	NULL
Dr03543	GO:0016020	NULL	nodulin-like protein	IPR010658|IPR016196	Nodulin-like|Major facilitator superfamily domain, general substrate transporter	NULL	NULL	NULL
Dr03545	NULL	NULL	NULL	IPR026111|IPR027817	Actin-binding Rho-activating protein/Costars protein|Costars domain	NULL	NULL	NULL
Dr03450	NULL	NULL	NULL	IPR007207|IPR007282|IPR012270	CCR4-Not complex component, Not N-terminal domain|NOT2/NOT3/NOT5|CCR4-NOT complex, subunit 3/ 5	GO:0005634|GO:0006355	NULL	Reactome: REACT_21257
Dr03451	GO:0006260|GO:0003677|GO:0009793|GO:0005524|GO:0017111	EC:3.6.1.15	replication factor c subunit 3-like	IPR013748|IPR008921|IPR027417|IPR003593	Replication factor C, C-terminal domain|DNA polymerase III, clamp loader complex, gamma/delta/delta subunit, C-terminal|P-loop containing nucleoside triphosphate hydrolase|AAA+ ATPase domain	GO:0003677|GO:0006260|GO:0000166|GO:0017111	NULL	Reactome: REACT_152|Reactome: REACT_1538|Reactome: REACT_216|Reactome: REACT_22172|Reactome: REACT_383
Dr03463	GO:0009536	NULL	ankyrin repeat and regulator of chromosome condensation domain-containing protein	IPR000408|IPR020683|IPR009091|IPR002110	Regulator of chromosome condensation, RCC1|Ankyrin repeat-containing domain|Regulator of chromosome condensation 1/beta-lactamase-inhibitor protein II|Ankyrin repeat	GO:0005515	NULL	NULL
Dr03470	NULL	NULL	NULL	IPR019369|IPR002052	DNA methylase, N-6 adenine-specific, eukaryotic|DNA methylase, N-6 adenine-specific, conserved site	GO:0003676|GO:0008168|GO:0032259	NULL	NULL
Dr03471	GO:0005622	NULL	histone deacetylase	IPR000286|IPR023801|IPR001876	Histone deacetylase superfamily|Histone deacetylase domain|Zinc finger, RanBP2-type	GO:0008270	NULL	NULL
Dr03472	GO:0005737|GO:0016020	NULL	protein	IPR001104	3-oxo-5-alpha-steroid 4-dehydrogenase, C-terminal	GO:0005737|GO:0006629|GO:0016021|GO:0016627	NULL	Reactome: REACT_22258
Dr03477	NULL	NULL	NULL	NULL	NULL	NULL	NULL	NULL
Dr03481	GO:0043229|GO:0003677	NULL	methyl- binding domain containing expressed	IPR001739|IPR016177	Methyl-CpG DNA binding|DNA-binding domain	GO:0003677|GO:0005634	NULL	NULL
Dr03437	GO:0009536	NULL	nuclear pore complex protein	IPR019321|IPR019366|IPR017986	Nucleoporin Nup88|Clusterin-associated protein-1|WD40-repeat-containing domain	GO:0005515	NULL	NULL
Dr03500	NULL	NULL	NULL	NULL	NULL	NULL	NULL	NULL
Dr03509	GO:0006457|GO:0005528|GO:0005886|GO:0048366|GO:0000413|GO:0003755|GO:0005516	EC:5.2.1.8	42 kda peptidyl-prolyl isomerase	IPR023566|IPR001179|IPR000058|IPR011990|IPR019734|IPR015880|IPR007087|IPR013026	Peptidyl-prolyl cis-trans isomerase, FKBP-type|Peptidyl-prolyl cis-trans isomerase, FKBP-type, domain|Zinc finger, AN1-type|Tetratricopeptide-like helical|Tetratricopeptide repeat|Zinc finger, C2H2-like|Zinc finger, C2H2|Tetratricopeptide repeat-containing domain	GO:0006457|GO:0008270|GO:0005515|GO:0046872	NULL	NULL
Dr03519	GO:0008152|GO:0016787|GO:0009536	NULL	alpha beta fold family protein	IPR000073	Alpha/beta hydrolase fold-1	NULL	NULL	NULL
Dr03438	NULL	NULL	NULL	IPR011430|IPR016024|IPR011989	Down-regulated-in-metastasis protein|Armadillo-type fold|Armadillo-like helical	GO:0005488	NULL	NULL
Dr03521	GO:0009536	NULL	cleavage and polyadenylation specificity factor a subunit protein	IPR004871	Cleavage/polyadenylation specificity factor, A subunit, C-terminal	GO:0003676|GO:0005634	NULL	NULL
Dr03523	GO:0008643|GO:0016020	NULL	major facilitator protein	NULL	NULL	NULL	NULL	NULL
Dr03557	GO:0009536|GO:0016020	NULL	transport protein	IPR009577	Putative small multi-drug export	NULL	NULL	NULL
Dr03560	NULL	NULL	NULL	IPR010625|IPR009069	CHCH|Cysteine alpha-hairpin motif superfamily	NULL	NULL	NULL
Dr03464	GO:0048316|GO:0005739|GO:0004827|GO:0010109|GO:0009553|GO:0048481|GO:0005524|GO:0009570|GO:0006433|GO:0006525|GO:0006560	EC:6.1.1.15	prolyl-trna synthetase	IPR004499|IPR002314|IPR004154|IPR016061|IPR017449|IPR002316|IPR006195	Proline-tRNA ligase, class IIa, archaeal-type|Aminoacyl-tRNA synthetase, class II (G/ H/ P/ S), conserved domain|Anticodon-binding|Proline-tRNA ligase, class II, C-terminal|Proline-tRNA ligase, class IIa|Prolyl-tRNA synthetase, class II|Aminoacyl-tRNA synthetase, class II	GO:0004827|GO:0005524|GO:0005737|GO:0006433|GO:0000166|GO:0004812|GO:0006418	EC:6.1.1.15	KEGG: 00970+6.1.1.15|Reactome: REACT_71
Dr03468	GO:0006468|GO:0005524|GO:0004674|GO:0009536|GO:0009069	EC:2.7.11.0	tousled-like kinase	IPR027085|IPR000719|IPR011009|IPR002290|IPR017441|IPR008271	Serine/threonine-protein kinase TOUSLED|Protein kinase domain|Protein kinase-like domain|Serine/threonine- / dual specificity protein kinase, catalytic domain|Protein kinase, ATP binding site|Serine/threonine-protein kinase, active site	GO:0004674|GO:0004672|GO:0005524|GO:0006468|GO:0016772	NULL	NULL
Dr03478	NULL	NULL	NULL	IPR006780|IPR009071	YABBY protein|High mobility group box domain	NULL	NULL	NULL
Dr03479	NULL	NULL	NULL	NULL	NULL	NULL	NULL	NULL
Dr03486	GO:0016023|GO:0016021	NULL	probable sugar phosphate phosphate translocator at3g17430-like	IPR004853	Triose-phosphate transporter domain	NULL	NULL	NULL
Dr03491	GO:0009536	NULL	uncharacterized protein	IPR024420|IPR011990	TRAPP III complex, Trs85|Tetratricopeptide-like helical	GO:0005515	NULL	NULL
Dr03495	NULL	NULL	NULL	IPR006076	FAD dependent oxidoreductase	GO:0016491|GO:0055114	NULL	NULL
Dr03496	GO:0006511|GO:0006281|GO:0010100|GO:0000209|GO:0009536|GO:0009908|GO:0031625|GO:0016874|GO:0080008|GO:0009755|GO:0048366|GO:0048825|GO:0048575|GO:0010182|GO:0005634	NULL	cullin 4	IPR001373|IPR019559|IPR016159|IPR016158|IPR011991|IPR016157	Cullin, N-terminal|Cullin protein, neddylation domain|Cullin repeat-like-containing domain|Cullin homology|Winged helix-turn-helix DNA-binding domain|Cullin, conserved site	GO:0006511|GO:0031461|GO:0031625	NULL	UniPathway: UPA00143
Dr03442	GO:0000911|GO:0016192|GO:0010540|GO:0080119|GO:0009942|GO:0005086|GO:0010087|GO:0032012|GO:0010292|GO:0007155|GO:0005802|GO:0048765|GO:0009826|GO:0042803|GO:0001736|GO:0043087	NULL	pattern formation protein emb30-like	IPR000904|IPR025870|IPR016024|IPR023394	Sec7 domain|Glyoxalase-like domain|Armadillo-type fold|Sec7 domain, alpha orthogonal bundle	GO:0005086|GO:0032012|GO:0005488	NULL	NULL
Dr03563	GO:0004527|GO:0090305|GO:0003677|GO:0005634|GO:0006281	NULL	exonuclease 1-like	IPR006084|IPR006085|IPR006086|IPR020045|IPR008918	XPG/Rad2 endonuclease|XPG N-terminal|XPG-I domain|5'-3' exonuclease, C-terminal domain|Helix-hairpin-helix motif, class 2	GO:0004518|GO:0006281|GO:0003677|GO:0003824	NULL	NULL
Dr03568	GO:0004725|GO:0035335|GO:0006570	EC:3.1.3.48	magnesium-dependent phosphatase	IPR024734|IPR010036|IPR023214|IPR010033	Magnesium-dependent phosphatase-1, eukaryotic type|Magnesium-dependent phosphatase-1, eukaryotic/arcaheal type|HAD-like domain|HAD-superfamily phosphatase, subfamily IIIC	GO:0016791	NULL	NULL
Dr03569	NULL	NULL	NULL	NULL	NULL	NULL	NULL	NULL
Dr03573	GO:0005739	NULL	protein	NULL	NULL	NULL	NULL	NULL
Dr03575	GO:0005739	NULL	trichome birefringence-like 13 protein	IPR026057|IPR025846	PC-Esterase|PMR5 N-terminal domain	NULL	NULL	NULL
Dr03576	GO:0046872|GO:0006979|GO:0016023|GO:0020037|GO:0004601|GO:0055114|GO:0006804	EC:1.11.1.7	peroxidase 7-like	IPR002016|IPR010255|IPR000823|IPR019793|IPR019794	Haem peroxidase, plant/fungal/bacterial|Plant peroxidase|Haem peroxidase|Peroxidases heam-ligand binding site|Peroxidase, active site	GO:0004601|GO:0006979|GO:0020037|GO:0055114	EC:1.11.1.7	KEGG: 00360+1.11.1.7|KEGG: 00940+1.11.1.7|MetaCyc: PWY-5461|MetaCyc: PWY-7214
Dr03585	GO:0005737|GO:0046872|GO:0032259|GO:0008168	EC:2.1.1.0	e3 ubiquitin-protein ligase ring1a-like	IPR018957|IPR013083|IPR001841|IPR017907	Zinc finger, C3HC4 RING-type|Zinc finger, RING/FYVE/PHD-type|Zinc finger, RING-type|Zinc finger, RING-type, conserved site	GO:0046872|GO:0005515|GO:0008270	NULL	NULL
Dr03589	GO:0000064|GO:0005290|GO:0015189|GO:0015817|GO:0015181|GO:0015822|GO:0016021|GO:0015819|GO:0005739|GO:0015809	NULL	mitochondrial substrate carrier family protein	IPR018108|IPR023395	Mitochondrial substrate/solute carrier|Mitochondrial carrier domain	NULL	NULL	NULL
Dr03590	NULL	NULL	NULL	NULL	NULL	NULL	NULL	NULL
Dr03592	NULL	NULL	NULL	NULL	NULL	NULL	NULL	NULL
Dr03602	GO:0047220|GO:0005794|GO:0006486|GO:0016021|GO:0030206	EC:2.4.1.134	probable beta- -galactosyltransferase 2-like	IPR002659|IPR025298	Glycosyl transferase, family 31|Domain of unknown function DUF4094	GO:0006486|GO:0008378|GO:0016020	EC:2.4.1.-	UniPathway: UPA00378|KEGG: 00051+2.4.1.-|KEGG: 00512+2.4.1.-|KEGG: 00513+2.4.1.-|KEGG: 00514+2.4.1.-|KEGG: 00522+2.4.1.-|KEGG: 00533+2.4.1.-|KEGG: 00540+2.4.1.-|KEGG: 00550+2.4.1.-|KEGG: 00561+2.4.1.-|KEGG: 00563+2.4.1.-|KEGG: 00600+2.4.1.-|KEGG: 00601+2.4.1.-|KEGG: 00603+2.4.1.-|KEGG: 00604+2.4.1.-|KEGG: 00906+2.4.1.-|KEGG: 00908+2.4.1.-|KEGG: 00941+2.4.1.-|KEGG: 00942+2.4.1.-|KEGG: 00944+2.4.1.…
Dr03603	GO:0004527|GO:0044237|GO:1901363|GO:0097159	NULL	rrp6-like protein 3	IPR002121|IPR002562|IPR010997|IPR012337	HRDC domain|3'-5' exonuclease domain|HRDC-like|Ribonuclease H-like domain	GO:0003676|GO:0005622|GO:0006139|GO:0008408|GO:0000166|GO:0003824|GO:0044237	NULL	NULL
Dr03622	NULL	NULL	NULL	IPR028222|IPR016024	AP-5 complex subunit zeta-1|Armadillo-type fold	GO:0044599|GO:0005488	NULL	NULL
Dr03631	GO:0005739	NULL	protein	IPR001680|IPR022175|IPR017986|IPR015943	WD40 repeat|Breast carcinoma amplified sequence 3|WD40-repeat-containing domain|WD40/YVTN repeat-like-containing domain	GO:0005515	NULL	NULL
Dr03646	GO:0031977|GO:0009523|GO:0009534	NULL	photosystem ii oxygen-evolving complex protein 3-like	IPR008797|IPR023222	Photosystem II PsbQ, oxygen evolving complex|PsbQ-like domain	GO:0005509|GO:0009523|GO:0009654|GO:0015979|GO:0019898	NULL	NULL
Dr03656	NULL	NULL	NULL	NULL	NULL	NULL	NULL	NULL
Dr03657	NULL	NULL	NULL	IPR027356|IPR011333|IPR000210	NPH3 domain|BTB/POZ fold|BTB/POZ-like	GO:0005515	NULL	UniPathway: UPA00143
Dr03668	GO:0005739|GO:0009536	NULL	outer arm dynein light chain 1 protein	IPR025875|IPR003591|IPR001611	Leucine rich repeat 4|Leucine-rich repeat, typical subtype|Leucine-rich repeat	GO:0005515	NULL	NULL
Dr03696	GO:0046872|GO:0009765|GO:0009523|GO:0018298|GO:0016168|GO:0016021|GO:0009522|GO:0009535|GO:0005198	NULL	light-harvesting complex ii protein lhcb3	IPR001344|IPR022796|IPR023329	Chlorophyll A-B binding protein, plant|Chlorophyll A-B binding protein|Chlorophyll a/b binding protein domain	GO:0009765|GO:0016020	NULL	NULL
Dr03708	GO:0046872|GO:0003676|GO:0003824	NULL	chromatin remodeling complex subunit	IPR000330|IPR001650|IPR027417|IPR013083|IPR001841|IPR014001|IPR017907	SNF2-related|Helicase, C-terminal|P-loop containing nucleoside triphosphate hydrolase|Zinc finger, RING/FYVE/PHD-type|Zinc finger, RING-type|Helicase, superfamily 1/2, ATP-binding domain|Zinc finger, RING-type, conserved site	GO:0003677|GO:0005524|GO:0003676|GO:0004386|GO:0005515|GO:0008270	NULL	NULL
Dr03722	GO:0016023|GO:0008374|GO:0042967	NULL	lecithin-cholesterol acyltransferase-like 1	IPR003386	Lecithin:cholesterol/phospholipid:diacylglycerol acyltransferase	GO:0006629|GO:0008374	NULL	NULL
Dr03561	GO:0005507|GO:0005739|GO:0055114|GO:0004491|GO:0006979|GO:0006020|GO:0006550|GO:0006552|GO:0006574	EC:1.2.1.27	methylmalonate-semialdehyde dehydrogenase	IPR010061|IPR015590|IPR016161|IPR016163|IPR016162|IPR016160	Methylmalonate-semialdehyde dehydrogenase|Aldehyde dehydrogenase domain|Aldehyde/histidinol dehydrogenase|Aldehyde dehydrogenase, C-terminal|Aldehyde dehydrogenase, N-terminal|Aldehyde dehydrogenase, conserved site	GO:0004491|GO:0055114|GO:0008152|GO:0016491|GO:0016620	EC:1.2.1.27|EC:1.2.1.18|EC:1.2.1.18+1.2.1.27	KEGG: 00280+1.2.1.27|KEGG: 00410+1.2.1.18|KEGG: 00562+1.2.1.18|KEGG: 00640+1.2.1.18+1.2.1.27|MetaCyc: PWY-5642|MetaCyc: PWY-6373
Dr03586	GO:0009941|GO:0008508|GO:0016021|GO:0006814|GO:0015721	NULL	uncharacterized sodium-dependent transporter yocs-like	IPR002657	Bile acid:sodium symporter	GO:0006814|GO:0008508|GO:0016020	NULL	NULL
Dr03594	GO:0000325|GO:0015079|GO:0005886|GO:0071805|GO:0005774	NULL	potassium transporter 7-like	IPR003855	K+ potassium transporter	GO:0015079|GO:0016020|GO:0071805	NULL	NULL
Dr03604	GO:0006281|GO:0005777|GO:0009414|GO:0009965|GO:0016567|GO:0009791|GO:0000166|GO:0003824|GO:0009734|GO:0005634	NULL	nedd8-activating enzyme e1 regulatory subunit	IPR000594|IPR009036|IPR016040	UBA/THIF-type NAD/FAD binding fold|Molybdenum cofactor biosynthesis, MoeB|NAD(P)-binding domain	GO:0003824	NULL	NULL
Dr03608	GO:0004386|GO:0003676|GO:0000166	NULL	dead-box atp-dependent rna helicase 32	IPR011545|IPR001650|IPR025313|IPR027417|IPR014001|IPR014014	DNA/RNA helicase, DEAD/DEAH box type, N-terminal|Helicase, C-terminal|Domain of unknown function DUF4217|P-loop containing nucleoside triphosphate hydrolase|Helicase, superfamily 1/2, ATP-binding domain|RNA helicase, DEAD-box type, Q motif	GO:0003676|GO:0005524|GO:0008026|GO:0004386	NULL	NULL
Dr03611	NULL	NULL	NULL	IPR001715|IPR000048|IPR016024|IPR027417|IPR011989	Calponin homology domain|IQ motif, EF-hand binding site|Armadillo-type fold|P-loop containing nucleoside triphosphate hydrolase|Armadillo-like helical	GO:0005515|GO:0005488	NULL	NULL
Dr03615	GO:0008017|GO:0010005|GO:0009826|GO:0007275|GO:0010031|GO:0045298	NULL	microtubule-associated protein tortifolia1	IPR016024|IPR011989	Armadillo-type fold|Armadillo-like helical	GO:0005488	NULL	NULL
Dr03625	NULL	NULL	NULL	IPR019153	DDRGK domain containing protein	NULL	NULL	NULL
Dr03629	GO:0005783|GO:0004366|GO:0005886|GO:0042967|GO:0046486	EC:2.3.1.15	glycerol-3-phosphate acyltransferase	IPR002123	Phospholipid/glycerol acyltransferase	GO:0008152|GO:0016746	NULL	NULL
Dr03630	GO:0009536	NULL	protein	IPR002816	Pheromone shutdown, TraB	NULL	NULL	NULL
Dr03680	GO:0016023	NULL	uncharacterized gpi-anchored protein at4g28100-like	NULL	NULL	NULL	NULL	NULL
Dr03698	NULL	NULL	NULL	IPR008480|IPR025520	Protein of unknown function DUF761, plant|Domain of unknown function DUF4408	NULL	NULL	NULL
Dr03707	NULL	NULL	NULL	NULL	NULL	NULL	NULL	NULL
Dr03720	GO:0016020|GO:0004222|GO:0007155|GO:0006508|GO:0008270	EC:3.4.24.0	major surface like glycoprotein	IPR001577|IPR013111|IPR020067|IPR000742|IPR013032	Peptidase M8, leishmanolysin|EGF-like domain, extracellular|Frizzled domain|Epidermal growth factor-like domain|EGF-like, conserved site	GO:0004222|GO:0006508|GO:0007155|GO:0016020|GO:0005515	NULL	NULL
Dr03727	GO:0008152|GO:0005739	NULL	ribosomal rna small subunit methyltransferase e-like	IPR006700|IPR015947	Ribosomal RNA small subunit methyltransferase E|PUA-like domain	GO:0006364|GO:0008168	NULL	NULL
Dr03729	GO:0005730|GO:0032040|GO:0006364|GO:0009561	NULL	u3 small nucleolar rna-associated protein 11	IPR007144	Small-subunit processome, Utp11	GO:0006364|GO:0032040	NULL	NULL
Dr14945	GO:0004672|GO:0016023|GO:0000166|GO:0016310|GO:0016020	NULL	protein	IPR000719|IPR001611|IPR013210|IPR011009|IPR003591|IPR017441	Protein kinase domain|Leucine-rich repeat|Leucine-rich repeat-containing N-terminal, type 2|Protein kinase-like domain|Leucine-rich repeat, typical subtype|Protein kinase, ATP binding site	GO:0004672|GO:0005524|GO:0006468|GO:0005515|GO:0016772	NULL	NULL
Dr14962	GO:0006355|GO:0009536|GO:0004794|GO:0009097|GO:0003700|GO:0030170|GO:0005525|GO:0006544|GO:0006563|GO:0006566|GO:0005667|GO:0045449	EC:4.3.1.19	threonine dehydratase chloroplastic-like	IPR001926	Tryptophan synthase beta subunit-like PLP-dependent enzymes superfamily	NULL	NULL	NULL
Dr14972	GO:0044238|GO:0034645|GO:0010467	NULL	suppressor of	IPR005100|IPR006645|IPR005824	Transcription elongation factor Spt5, NGN domain|Transcription antitermination protein NusG, N-terminal domain|KOW	GO:0006355	NULL	NULL
Dr14963	GO:0017183|GO:0004164|GO:0032259|GO:0046489	EC:2.1.1.98	diphthine synthase	IPR000878|IPR014776|IPR014777|IPR004551	Tetrapyrrole methylase|Tetrapyrrole methylase, subdomain 2|Tetrapyrrole methylase, subdomain 1|Diphthine synthase	GO:0008152|GO:0008168|GO:0004164|GO:0017183	NULL	UniPathway: UPA00559
Dr14964	GO:0009536	NULL	uncharacterized protein c19orf29 homolog	IPR019134|IPR018816	Cactin C-terminal domain|Cactin, domain	GO:0005515	NULL	NULL
Dr14970	GO:0016023|GO:0009505|GO:0006508|GO:0004190	EC:3.4.23.0	aspartic proteinase-like protein 2-like	IPR001461|IPR021109	Aspartic peptidase|Aspartic peptidase domain	GO:0004190|GO:0006508	NULL	NULL
Dr14994	GO:0016020|GO:0009536	NULL	tyrosine-specific transport	IPR018227	Tryptophan/tyrosine permease	GO:0003333	NULL	NULL
Dr14998	NULL	NULL	NULL	IPR002885|IPR011990	Pentatricopeptide repeat|Tetratricopeptide-like helical	GO:0005515	NULL	NULL
Dr14999	GO:0000025|GO:0004134|GO:0010297|GO:2001070|GO:0005829|GO:0005982|GO:0005985	EC:2.4.1.25	4-alpha-glucanotransferase	IPR002044|IPR003385|IPR013784|IPR017853|IPR013783|IPR013781	Carbohydrate binding module family 20|Glycoside hydrolase, family 77|Carbohydrate-binding-like fold|Glycoside hydrolase, superfamily|Immunoglobulin-like fold|Glycoside hydrolase, catalytic domain	GO:2001070|GO:0004134|GO:0005975|GO:0030246|GO:0003824	EC:2.4.1.25	KEGG: 00500+2.4.1.25|MetaCyc: PWY-5941|MetaCyc: PWY-6724|MetaCyc: PWY-6737|MetaCyc: PWY-7238
Dr15000	GO:0016114|GO:0050515|GO:0006796|GO:0000166|GO:0009507|GO:0006694	EC:2.7.1.148	4-diphosphocytidyl-2-c-methyl-d-erythritol kinase	IPR004424|IPR006204|IPR020568|IPR014721	4-diphosphocytidyl-2C-methyl-D-erythritol kinase|GHMP kinase N-terminal domain|Ribosomal protein S5 domain 2-type fold|Ribosomal protein S5 domain 2-type fold, subgroup	GO:0016114|GO:0050515|GO:0005524	EC:2.7.1.148	KEGG: 00900+2.7.1.148|UniPathway: UPA00056
Dr14977	GO:0006259|GO:0003677|GO:0005524|GO:0016740|GO:0004386	NULL	dna helicase ino80-like	IPR000330|IPR001650|IPR020838|IPR027417|IPR014001	SNF2-related|Helicase, C-terminal|DBINO domain|P-loop containing nucleoside triphosphate hydrolase|Helicase, superfamily 1/2, ATP-binding domain	GO:0003677|GO:0005524|GO:0003676|GO:0004386|GO:0016817	NULL	NULL
Dr14986	GO:0006355	NULL	transcription elongation factor spt6-like	IPR017072|IPR028083|IPR000980|IPR028231|IPR028088|IPR027999|IPR010994|IPR012340|IPR012337|IPR023097|IPR023323|IPR006641|IPR022967|IPR003029	Transcription elongation factor Spt6|Spt6 acidic, N-terminal domain|SH2 domain|Transcription elongation factor SPT6, YqgF domain|Helix-turn-helix DNA-binding domain of Spt6|Death-like domain of Spt6|RuvA domain 2-like|Nucleic acid-binding, OB-fold|Ribonuclease H-like domain|Tex RuvX-like domain|Tex-like domain|YqgF/RNase H-like domain|RNA-binding domain, S1|Ribosomal protein S1, RNA-binding domain	GO:0006357|GO:0032784|GO:0005515|GO:0003677|GO:0003676|GO:0006139|GO:0016788|GO:0003723	NULL	Reactome: REACT_216
Dr14979	NULL	NULL	NULL	NULL	NULL	NULL	NULL	NULL
Dr15016	GO:0009536|GO:0016020	NULL	probable serine incorporator-like	IPR005016	TMS membrane protein/tumour differentially expressed protein	GO:0016020	NULL	NULL
Dr15026	GO:0016023|GO:0016020	NULL	tvp38 tmem64 family membrane protein slr0305-like	IPR015414	SNARE associated Golgi protein	NULL	NULL	NULL
Dr15030	NULL	NULL	NULL	IPR006121	Heavy metal-associated domain, HMA	GO:0030001|GO:0046872	NULL	NULL
Dr15039	GO:0006783|GO:0004659|GO:0016020|GO:0005739	NULL	protoheme ix farnesyltransferase	IPR000537|IPR006369	UbiA prenyltransferase family|Protohaem IX farnesyltransferase	GO:0004659|GO:0016021|GO:0008495|GO:0048034	EC:2.5.1.-	KEGG: 00130+2.5.1.-|KEGG: 00270+2.5.1.-|KEGG: 00361+2.5.1.-|KEGG: 00380+2.5.1.-|KEGG: 00860+2.5.1.-|KEGG: 00920+2.5.1.-|KEGG: 00130+2.5.1.-|KEGG: 00270+2.5.1.-|KEGG: 00361+2.5.1.-|KEGG: 00380+2.5.1.-|KEGG: 00860+2.5.1.-|KEGG: 00920+2.5.1.-|UniPathway: UPA00834
Dr15055	GO:0042594|GO:0006623|GO:0009660|GO:0009536|GO:0051301|GO:0005774|GO:0005770|GO:0009959|GO:0005802|GO:0007033|GO:0007032|GO:0005783|GO:0009793	NULL	dnaj homolog subfamily c member 13-like	IPR001623|IPR025640|IPR016024|IPR011989	DnaJ domain|Domain of unknown function DUF4339|Armadillo-type fold|Armadillo-like helical	GO:0005488	NULL	NULL
Dr15058	GO:0016310|GO:0004765|GO:0005524|GO:0009507|GO:0000162|GO:0006571|GO:0009094	EC:2.7.1.71	shikimate kinase-like protein	IPR007052|IPR008978	CS domain|HSP20-like chaperone	NULL	NULL	NULL
Dr15070	GO:0004610|GO:0050896|GO:0005829|GO:0005739|GO:0046872|GO:0005975|GO:0006048	EC:5.4.2.3	phosphoacetylglucosamine mutase	IPR016657|IPR005843|IPR005844|IPR005845|IPR005846|IPR016055|IPR016066	Phosphoacetylglucosamine mutase|Alpha-D-phosphohexomutase, C-terminal|Alpha-D-phosphohexomutase, alpha/beta/alpha domain I|Alpha-D-phosphohexomutase, alpha/beta/alpha domain II|Alpha-D-phosphohexomutase, alpha/beta/alpha domain III|Alpha-D-phosphohexomutase, alpha/beta/alpha I/II/III|Alpha-D-phosphohexomutase, conserved site	GO:0004610|GO:0005975|GO:0016868|GO:0000287	EC:5.4.2.3|EC:5.4.2.10	KEGG: 00520+5.4.2.3|MetaCyc: PWY-5514|MetaCyc: PWY-6906|UniPathway: UPA00113|KEGG: 00520+5.4.2.10|MetaCyc: PWY-6749
Dr15073	NULL	NULL	NULL	IPR025602	BCP1 family	NULL	NULL	NULL
Dr15087	GO:0010189|GO:0050342|GO:0032259|GO:0009507	EC:2.1.1.95	gamma-tocopherol methyltransferase	IPR013216|IPR025774	Methyltransferase type 11|Tocopherol O-methyltransferase	GO:0008152|GO:0008168	EC:2.1.1.95	KEGG: 00130+2.1.1.95|MetaCyc: PWY-1422|UniPathway: UPA00160
Dr15092	GO:0016491|GO:0016310|GO:0043167|GO:0016772|GO:0055114|GO:0000166	NULL	short-chain dehydrogenase reductase family protein	IPR002198|IPR016040|IPR002347|IPR020904	Short-chain dehydrogenase/reductase SDR|Glucose/ribitol dehydrogenase|NAD(P)-binding domain|Short-chain dehydrogenase/reductase, conserved site	GO:0008152|GO:0016491	NULL	NULL
Dr15094	GO:0006457|GO:0046872|GO:0051082|GO:0031072|GO:0009536	NULL	uncharacterized protein	NULL	NULL	NULL	NULL	NULL
Dr15098	GO:0000377|GO:0009536	NULL	pentatricopeptide repeat-containing protein	IPR002885|IPR004860|IPR027434|IPR011990	Pentatricopeptide repeat|Homing endonuclease, LAGLIDADG|Homing endonuclease|Tetratricopeptide-like helical	GO:0004519|GO:0005515	NULL	NULL
Dr15099	GO:0015846|GO:0046872|GO:0042597|GO:0019808	NULL	protein	NULL	NULL	NULL	NULL	NULL
Dr15103	NULL	NULL	NULL	IPR004324|IPR016196	Biopterin transport-related protein BT1|Major facilitator superfamily domain, general substrate transporter	NULL	NULL	NULL
Dr15032	GO:0003824	NULL	eyes absent-like protein	NULL	NULL	NULL	NULL	NULL
Dr15042	GO:0005488|GO:0007165	NULL	two-component response regulator-like aprr2	IPR001789|IPR001005|IPR009057|IPR011006|IPR006447|IPR017930	Signal transduction response regulator, receiver domain|SANT/Myb domain|Homeodomain-like|CheY-like superfamily|Myb domain, plants|Myb domain	GO:0000156|GO:0000160|GO:0006355|GO:0003682|GO:0003677	NULL	Reactome: REACT_14797
Dr15043	GO:0016787	NULL	dna replication atp-dependent helicase dna2	IPR026851|IPR014808|IPR027417	Dna2|DNA replication factor Dna2, N-terminal|P-loop containing nucleoside triphosphate hydrolase	GO:0017108|GO:0033567|GO:0043142	NULL	NULL
Dr15053	GO:0080167|GO:0006857|GO:0005886|GO:0055085	NULL	isp4-like protein	IPR004813|IPR004648	Oligopeptide transporter, OPT superfamily|Tetrapeptide transporter, OPT1/isp4	GO:0055085	NULL	NULL
Dr15063	GO:0016023|GO:0005886	NULL	uncharacterized protein rsn1-like	IPR003864|IPR027815	Domain of unknown function DUF221|Domain of unknown function DUF4463	GO:0016020	NULL	NULL
Dr15064	GO:0055085|GO:0009845|GO:0016021|GO:0005353|GO:0005355|GO:0009911|GO:0015758|GO:0009705|GO:0016491|GO:0015755|GO:0009624|GO:0005886	NULL	d-xylose-proton symporter-like 2	IPR005828|IPR016196|IPR003663|IPR020846|IPR005829	General substrate transporter|Sugar/inositol transporter|Major facilitator superfamily domain, general substrate transporter|Major facilitator superfamily domain|Sugar transporter, conserved site	GO:0016021|GO:0022857|GO:0055085|GO:0016020|GO:0022891|GO:0005215|GO:0006810	NULL	Reactome: REACT_15518
Dr15075	GO:0005975|GO:0032450|GO:0030246|GO:0009507	EC:3.2.1.20	heteroglycan glucosidase 1	IPR000322|IPR025887|IPR017853|IPR011013|IPR013785	Glycoside hydrolase, family 31|Glycoside hydrolase family 31, N-terminal domain|Glycoside hydrolase, superfamily|Galactose mutarotase-like domain|Aldolase-type TIM barrel	GO:0004553|GO:0005975|GO:0003824|GO:0030246	NULL	NULL
Dr15079	GO:0071918|GO:0005886|GO:0015204|GO:0016021|GO:0015293|GO:0006995	NULL	urea active transporter-like protein	IPR001734|IPR019900	Sodium/solute symporter|Sodium/solute symporter, subgroup	GO:0005215|GO:0006810|GO:0016020|GO:0055085	NULL	NULL
Dr15081	NULL	NULL	NULL	IPR013591	Brevis radix (BRX) domain	NULL	NULL	NULL
Dr15095	GO:0006310|GO:0006281|GO:0003676|GO:0006260|GO:0005524|GO:0009378|GO:0043140|GO:0005657|GO:0009379	NULL	atp-dependent dna family expressed	IPR011545|IPR001650|IPR002121|IPR018982|IPR027417|IPR011991|IPR014001|IPR004589	DNA/RNA helicase, DEAD/DEAH box type, N-terminal|Helicase, C-terminal|HRDC domain|RQC domain|P-loop containing nucleoside triphosphate hydrolase|Winged helix-turn-helix DNA-binding domain|Helicase, superfamily 1/2, ATP-binding domain|DNA helicase, ATP-dependent, RecQ type	GO:0003676|GO:0005524|GO:0008026|GO:0004386|GO:0005622|GO:0006260|GO:0006281|GO:0043140|GO:0006310	NULL	NULL
Dr15100	GO:0005739	NULL	clathrin binding protein	IPR001452|IPR000108	Neutrophil cytosol factor 2 p67phox|Src homology-3 domain	GO:0005515	NULL	NULL
Dr15113	GO:0055114|GO:0015996|GO:0016491|GO:0009570	NULL	red chlorophyll catabolite reductase	IPR009439	Red chlorophyll catabolite reductase	NULL	EC:1.3.1.80	KEGG: 00860+1.3.1.80|MetaCyc: PWY-5098|MetaCyc: PWY-6927|UniPathway: UPA00674
Dr15161	GO:0006457|GO:0005528|GO:0000413|GO:0003755|GO:0009535	EC:5.2.1.8	fk506 binding protein	IPR023566|IPR001179	Peptidyl-prolyl cis-trans isomerase, FKBP-type|Peptidyl-prolyl cis-trans isomerase, FKBP-type, domain	GO:0006457	NULL	NULL
Dr15163	GO:0009536	NULL	at4g27390 m4i22_200	NULL	NULL	NULL	NULL	NULL
Dr15179	GO:0044444|GO:0043231	NULL	ring zinc finger protein	NULL	NULL	NULL	NULL	NULL
Dr15184	GO:0005739	NULL	uncharacterized protein loc100844027 isoform 2	NULL	NULL	NULL	NULL	NULL
Dr15185	GO:0009941	NULL	tic22-like protein	IPR007378	Tic22-like	NULL	NULL	NULL
Dr15143	NULL	NULL	NULL	IPR012866	Protein of unknown function DUF1644	NULL	NULL	NULL
Dr15159	GO:0044699|GO:0009723	NULL	protein	IPR025558|IPR013143	Domain of unknown function DUF4283|PCI/PINT associated module	NULL	NULL	NULL
Dr15167	GO:0016021|GO:0005789|GO:0006950	NULL	derlin-	IPR007599	Derlin	NULL	NULL	NULL
Dr15168	GO:0046854|GO:0006790|GO:0016773|GO:0008441|GO:0004441|GO:0009536	EC:2.7.1.0|EC:3.1.3.7|EC:3.1.3.57	pap-specific phosphatase hal2-like	IPR000760|IPR006239|IPR020583|IPR020550	Inositol monophosphatase|3(2),5 -bisphosphate nucleotidase HAL2|Inositol monophosphatase, metal-binding site|Inositol monophosphatase, conserved site	GO:0046854|GO:0006790|GO:0008441	EC:3.1.3.7	KEGG: 00920+3.1.3.7
Dr15172	GO:0055085|GO:0015217|GO:0016021|GO:0005778|GO:0090351|GO:0015867|GO:0006635|GO:0015866|GO:0005347|GO:0080024|GO:0015297	NULL	peroxisomal adenine nucleotide carrier 1	IPR018108|IPR023395|IPR002067	Mitochondrial substrate/solute carrier|Mitochondrial carrier protein|Mitochondrial carrier domain	GO:0055085	NULL	NULL
Dr15174	GO:0015031|GO:0009526|GO:0016020|GO:0005739	NULL	preprotein translocase subunit secy-like	IPR002208|IPR023201	SecY/SEC61-alpha family|SecY subunit domain	GO:0015031|GO:0016020	NULL	Reactome: REACT_15380
Dr15175	GO:0008152|GO:0016772	NULL	mevalonate kinase	IPR006205|IPR006204|IPR013750|IPR020568|IPR014721|IPR006206|IPR006203	Mevalonate kinase|GHMP kinase N-terminal domain|GHMP kinase, C-terminal domain|Mevalonate/galactokinase|Ribosomal protein S5 domain 2-type fold|Ribosomal protein S5 domain 2-type fold, subgroup|GHMP kinase, ATP-binding, conserved site	GO:0004496|GO:0005524|GO:0005737|GO:0008299|GO:0008152|GO:0016301|GO:0016773	EC:2.7.1.36|EC:2.7.1.6	KEGG: 00900+2.7.1.36|MetaCyc: PWY-6174|MetaCyc: PWY-922|KEGG: 00052+2.7.1.6|KEGG: 00520+2.7.1.6|MetaCyc: PWY-3821|MetaCyc: PWY-6317|MetaCyc: PWY-6527|UniPathway: UPA00214
Dr15115	GO:0003676|GO:0006479|GO:0008276	NULL	pentatricopeptide repeat-containing protein	IPR004557|IPR002052	Eukaryotic/archaeal PrmC-related|DNA methylase, N-6 adenine-specific, conserved site	GO:0008276|GO:0003676|GO:0008168|GO:0032259	NULL	NULL
Dr15119	GO:0009452|GO:0001510|GO:0008168	EC:2.1.1.0	ww domain-containing protein	IPR001202|IPR019012	WW domain|RNA cap guanine-N2 methyltransferase	GO:0005515|GO:0001510|GO:0008168|GO:0009452	EC:2.1.1.-	KEGG: 00130+2.1.1.-|KEGG: 00253+2.1.1.-|KEGG: 00270+2.1.1.-|KEGG: 00340+2.1.1.-|KEGG: 00350+2.1.1.-|KEGG: 00360+2.1.1.-|KEGG: 00380+2.1.1.-|KEGG: 00450+2.1.1.-|KEGG: 00522+2.1.1.-|KEGG: 00624+2.1.1.-|KEGG: 00627+2.1.1.-|KEGG: 00860+2.1.1.-|KEGG: 00940+2.1.1.-|KEGG: 00941+2.1.1.-|KEGG: 00942+2.1.1.-|KEGG: 00945+2.1.1.-|KEGG: 00950+2.1.1.-|KEGG: 00981+2.1.1.-
Dr15117	NULL	NULL	NULL	IPR017066|IPR001841	S-ribonuclease binding protein, SBP1, pollen|Zinc finger, RING-type	GO:0005515|GO:0008270	NULL	NULL
Dr15130	GO:0016020	NULL	nodulin 21 family expressed	IPR000620	Drug/metabolite transporter	GO:0016020	NULL	NULL
Dr15132	NULL	NULL	NULL	NULL	NULL	NULL	NULL	NULL
Dr15133	GO:0046488|GO:0044699|GO:0016307|GO:0016023|GO:0000166|GO:0016310|GO:0032502	NULL	phosphatidylinositol-4-phosphate 5-kinase	IPR023610|IPR002498|IPR003409|IPR027484|IPR027483|IPR016034|IPR017163	Phosphatidylinositol-4-phosphate 5-kinase|Phosphatidylinositol-4-phosphate 5-kinase, core|MORN motif|Phosphatidylinositol-4-phosphate 5-kinase, N-terminal domain|Phosphatidylinositol-4-phosphate 5-kinase, C-terminal|Phosphatidylinositol-4-phosphate 5-kinase, core, subgroup|Phosphatidylinositol-4-phosphate 5-kinase, plant	GO:0016307|GO:0046488|GO:0005524|GO:0016308	EC:2.7.1.68	KEGG: 00562+2.7.1.68|MetaCyc: PWY-6351|MetaCyc: PWY-6352
Dr15154	GO:0018344|GO:0004663|GO:0005968|GO:0018346	EC:2.5.1.60	geranylgeranyl transferase type-2 subunit beta	IPR026873|IPR001330|IPR008930	Geranylgeranyl transferase type-2 subunit beta|Prenyltransferase/squalene oxidase|Terpenoid cyclases/protein prenyltransferase alpha-alpha toroid	GO:0004663|GO:0018344|GO:0003824	NULL	NULL
Dr15269	GO:0003677|GO:0006355	NULL	nac domain ipr003441	IPR003441	NAC domain	GO:0003677|GO:0006355	NULL	NULL
Dr15275	GO:0009536|GO:0016020	NULL	esterase lipase domain-containing protein	NULL	NULL	NULL	NULL	NULL
Dr15280	NULL	NULL	NULL	IPR012438	Protein of unknown function DUF1639	NULL	NULL	NULL
Dr15294	GO:0008152|GO:0016829|GO:0000287|GO:0030976	NULL	2-hydroxyacyl- lyase	IPR012000|IPR011766|IPR012001|IPR000399	Thiamine pyrophosphate enzyme, central domain|Thiamine pyrophosphate enzyme, C-terminal TPP-binding|Thiamine pyrophosphate enzyme, N-terminal TPP-binding domain|TPP-binding enzyme, conserved site	GO:0000287|GO:0030976|GO:0003824	NULL	NULL
Dr15295	GO:0006810|GO:0071840|GO:0031325|GO:0016023|GO:0005938|GO:0009734|GO:0005887	NULL	nodulin-like protein	IPR000620	Drug/metabolite transporter	GO:0016020	NULL	NULL
Dr15211	GO:0016023|GO:0016020	NULL	duf21 domain-containing protein at1g47330-like	IPR002550|IPR000644	Domain of unknown function DUF21|CBS domain	GO:0030554	NULL	NULL
Dr15213	GO:0016310|GO:0004672|GO:0016020|GO:0009536|GO:0000166	NULL	protein	IPR005349	Uncharacterised protein family UPF0136, Transmembrane	GO:0016020	NULL	NULL
Dr15220	GO:0005747	NULL	uncharacterized protein	IPR019721	NADH-ubiquinone oxidoreductase, 21kDa subunit, N-terminal	NULL	EC:1.6.99.3+1.6.5.3	KEGG: 00190+1.6.99.3+1.6.5.3|MetaCyc: PWY-3781|MetaCyc: PWY-4302|MetaCyc: PWY-5083|MetaCyc: PWY-6692
Dr15200	GO:0052692|GO:0005975|GO:0009505|GO:0016757|GO:0016023|GO:0048046	EC:3.2.1.22	alpha-galactosidase 1	IPR000111|IPR017853|IPR013780|IPR013785|IPR002241	Glycoside hydrolase, clan GH-D|Glycoside hydrolase, family 27|Glycoside hydrolase, superfamily|Glycosyl hydrolase, family 13, all-beta|Aldolase-type TIM barrel	GO:0004553|GO:0005975|GO:0003824	EC:3.2.1.22	KEGG: 00052+3.2.1.22|KEGG: 00561+3.2.1.22|KEGG: 00600+3.2.1.22|KEGG: 00603+3.2.1.22|MetaCyc: PWY-6527
Dr15226	NULL	NULL	NULL	NULL	NULL	NULL	NULL	NULL
Dr15239	GO:0008152|GO:0003824	NULL	rop guanine nucleotide exchange factor 1-like	IPR005512	PRONE domain	GO:0005089	NULL	NULL
Dr15242	NULL	NULL	NULL	IPR007218	DNA polymerase delta, subunit 4	GO:0005634|GO:0006260	NULL	NULL
Dr15245	GO:0005739|GO:0004527	NULL	carbon catabolite repressor protein 4-like 4	IPR005135	Endonuclease/exonuclease/phosphatase	NULL	NULL	NULL
Dr15258	GO:0030001|GO:0046872	NULL	farnesylated protein 2	IPR006121	Heavy metal-associated domain, HMA	GO:0030001|GO:0046872	NULL	NULL
Dr15259	GO:0005199|GO:0030001|GO:0046872|GO:0005618|GO:0042546	NULL	heavy metal transport detoxification domain-containing protein	IPR006121	Heavy metal-associated domain, HMA	GO:0030001|GO:0046872	NULL	NULL
Dr15270	NULL	NULL	NULL	IPR008195|IPR012870	Ribosomal protein L34Ae|Protein of unknown function DUF1666	GO:0003735|GO:0005622|GO:0005840|GO:0006412	NULL	NULL
Dr15271	GO:0047372|GO:0003676|GO:0009536|GO:0016042|GO:0046486	EC:3.1.1.23	alpha beta fold family protein	IPR000073	Alpha/beta hydrolase fold-1	NULL	NULL	NULL
Dr15283	NULL	NULL	NULL	NULL	NULL	NULL	NULL	NULL
Dr15203	GO:0009965|GO:0009911|GO:0032940|GO:0009505|GO:0016023|GO:0016139|GO:0052692|GO:0046477|GO:0009311	EC:3.2.1.22	alpha-galactosidase	IPR000111|IPR017853|IPR013780|IPR013785|IPR002241	Glycoside hydrolase, clan GH-D|Glycoside hydrolase, family 27|Glycoside hydrolase, superfamily|Glycosyl hydrolase, family 13, all-beta|Aldolase-type TIM barrel	GO:0004553|GO:0005975|GO:0003824	EC:3.2.1.22	KEGG: 00052+3.2.1.22|KEGG: 00561+3.2.1.22|KEGG: 00600+3.2.1.22|KEGG: 00603+3.2.1.22|MetaCyc: PWY-6527
Dr15199	GO:0005737|GO:0004743|GO:0046686|GO:0005886|GO:0016310|GO:0030955|GO:0005524|GO:0000287|GO:0006096|GO:0006094|GO:0006144|GO:0015976	EC:2.7.1.40	pyruvate kinase	IPR001697|IPR015793|IPR015795|IPR011037|IPR015813|IPR015806|IPR015794|IPR018209	Pyruvate kinase|Pyruvate kinase, barrel|Pyruvate kinase, C-terminal|Pyruvate kinase-like, insert domain|Pyruvate/Phosphoenolpyruvate kinase-like domain|Pyruvate kinase, beta-barrel insert domain|Pyruvate kinase, alpha/beta|Pyruvate kinase, active site	GO:0000287|GO:0004743|GO:0006096|GO:0030955|GO:0003824	EC:2.7.1.40	KEGG: 00010+2.7.1.40|KEGG: 00230+2.7.1.40|KEGG: 00620+2.7.1.40|MetaCyc: PWY-1042|MetaCyc: PWY-2221|MetaCyc: PWY-5484|MetaCyc: PWY-5723|MetaCyc: PWY-6142|MetaCyc: PWY-6886|MetaCyc: PWY-6901|MetaCyc: PWY-7003|MetaCyc: PWY-7218|Reactome: REACT_474|UniPathway: UPA00109
Dr15210	GO:0003896|GO:0006269|GO:0005657|GO:0005730|GO:0006351	NULL	dna primase	NULL	NULL	NULL	NULL	NULL
Dr15214	GO:0006464|GO:0016881	EC:6.3.2.0	probable ubiquitin-conjugating enzyme e2 23-like	IPR000608|IPR016135	Ubiquitin-conjugating enzyme, E2|Ubiquitin-conjugating enzyme/RWD-like	GO:0016881	NULL	NULL
Dr15219	GO:0070981|GO:0004066|GO:0006541|GO:0005524|GO:0006522|GO:0006531	EC:6.3.5.4	asparagine synthetase	IPR001962|IPR000583|IPR014729|IPR006426|IPR017932	Asparagine synthase|Class II glutamine amidotransferase domain|Rossmann-like alpha/beta/alpha sandwich fold|Asparagine synthase, glutamine-hydrolyzing|Glutamine amidotransferase type 2 domain	GO:0004066|GO:0006529|GO:0008152	EC:6.3.5.4	KEGG: 00250+6.3.5.4|UniPathway: UPA00134
Dr15238	GO:0010327	NULL	benzoyl coenzyme a: benzyl alcohol benzoyl transferase	IPR003480|IPR023213	Transferase|Chloramphenicol acetyltransferase-like domain	GO:0016747	NULL	NULL
Dr15243	GO:0016787|GO:0005634	NULL	cleavage and polyadenylation specificity factor subunit 3-i	IPR001279|IPR011108|IPR022712|IPR021718	Beta-lactamase-like|RNA-metabolising metallo-beta-lactamase|Beta-Casp domain|Pre-mRNA 3'-end-processing endonuclease polyadenylation factor C-term	GO:0016787	NULL	NULL
Dr15244	GO:0016023	NULL	protein notum homolog	IPR004963	Protein notum homologue	NULL	EC:3.-.-.-	KEGG: 00231+3.-.-.-|KEGG: 00563+3.-.-.-|KEGG: 00983+3.-.-.-
Dr15253	GO:0043231|GO:0044444|GO:0016772	NULL	probable leucine-rich repeat receptor-like protein kinase at1g68400-like	IPR000719|IPR001611|IPR013210|IPR011009|IPR013320|IPR017441	Protein kinase domain|Leucine-rich repeat|Leucine-rich repeat-containing N-terminal, type 2|Protein kinase-like domain|Concanavalin A-like lectin/glucanase, subgroup|Protein kinase, ATP binding site	GO:0004672|GO:0005524|GO:0006468|GO:0005515|GO:0016772	NULL	NULL
Dr15255	GO:0022891|GO:0055085|GO:0008643|GO:0016021	NULL	plastidic glucose transporter 4	IPR005828|IPR016196|IPR003663|IPR020846|IPR005829	General substrate transporter|Sugar/inositol transporter|Major facilitator superfamily domain, general substrate transporter|Major facilitator superfamily domain|Sugar transporter, conserved site	GO:0016021|GO:0022857|GO:0055085|GO:0016020|GO:0022891|GO:0005215|GO:0006810	NULL	Reactome: REACT_15518
Dr15260	GO:0043231|GO:0044444|GO:0016020	NULL	signal peptidase	IPR007653	Signal peptidase 22kDa subunit	GO:0005787|GO:0006465|GO:0008233|GO:0016021	EC:3.4.-.-	KEGG: 00310+3.4.-.-|KEGG: 00550+3.4.-.-|KEGG: 00780+3.4.-.-
Dr15264	GO:0009505|GO:0009044|GO:0010411|GO:0046556|GO:0046686|GO:0032450|GO:0016023|GO:0030246|GO:0009507|GO:0048046|GO:0045493|GO:0005982|GO:0005985|GO:0009117	EC:3.2.1.37|EC:3.2.1.55|EC:3.2.1.20	alpha-xylosidase precursor	IPR000322|IPR025887|IPR017853|IPR011013|IPR013785	Glycoside hydrolase, family 31|Glycoside hydrolase family 31, N-terminal domain|Glycoside hydrolase, superfamily|Galactose mutarotase-like domain|Aldolase-type TIM barrel	GO:0004553|GO:0005975|GO:0003824|GO:0030246	NULL	NULL
Dr15317	GO:0097159|GO:1901363|GO:0003824	NULL	atp-dependent helicase brm	IPR000330|IPR001650|IPR014978|IPR001487|IPR027417|IPR014001	SNF2-related|Helicase, C-terminal|Glutamine-Leucine-Glutamine, QLQ|Bromodomain|P-loop containing nucleoside triphosphate hydrolase|Helicase, superfamily 1/2, ATP-binding domain	GO:0003677|GO:0005524|GO:0003676|GO:0004386|GO:0005634|GO:0006355|GO:0016818|GO:0005515	NULL	NULL
Dr15327	GO:0009536	NULL	uncharacterized protein	NULL	NULL	NULL	NULL	NULL
Dr15328	GO:0009536	NULL	lob domain-containing	IPR004883	Lateral organ boundaries, LOB	NULL	NULL	NULL
Dr15346	GO:0016020|GO:0016772	NULL	dolichol kinase	NULL	NULL	NULL	NULL	NULL
Dr15347	GO:0016567|GO:0004842|GO:0044424	EC:6.3.2.19	u-box domain-containing protein 14	IPR000225|IPR003613|IPR016024|IPR011989|IPR013083	Armadillo|U box domain|Armadillo-type fold|Armadillo-like helical|Zinc finger, RING/FYVE/PHD-type	GO:0005515|GO:0000151|GO:0004842|GO:0016567|GO:0005488	NULL	NULL
Dr15350	GO:0016874	NULL	s-adenosylmethionine-dependent methyltransferase domain-containing protein	IPR019410	Nicotinamide N-methyltransferase-like	NULL	NULL	NULL
Dr15352	GO:0044763	NULL	hap1 n-terminal conserved region and shugoshin c terminus domain-containing protein	IPR011515	Shugoshin, C-terminal	GO:0000775|GO:0005634|GO:0045132	NULL	NULL
Dr15358	GO:0006543|GO:0009570|GO:0016036|GO:0070409	NULL	carbamoyl-phosphate synthase small chain	IPR017926|IPR002474|IPR006274	Glutamine amidotransferase|Carbamoyl-phosphate synthase, small subunit N-terminal domain|Carbamoyl-phosphate synthase, small subunit	GO:0006543|GO:0070409	EC:6.3.5.5	Reactome: REACT_1698|KEGG: 00240+6.3.5.5|KEGG: 00250+6.3.5.5|MetaCyc: PWY-5154|MetaCyc: PWY-5686|UniPathway: UPA00068|UniPathway: UPA00070
Dr15306	GO:0009414|GO:0050660|GO:0042554|GO:0004855|GO:0008762|GO:0009055|GO:0005506|GO:0004854|GO:0051537|GO:0046110|GO:0000302|GO:0055114|GO:0006040|GO:0006118	EC:1.17.3.2|EC:1.1.1.158|EC:1.17.1.4	xanthine dehydrogenase	IPR001041|IPR002346|IPR000674|IPR002888|IPR008274|IPR005107|IPR016166|IPR012675|IPR016167|IPR016169|IPR016208|IPR006058	2Fe-2S ferredoxin-type domain|Molybdopterin dehydrogenase, FAD-binding|Aldehyde oxidase/xanthine dehydrogenase, a/b hammerhead|[2Fe-2S]-binding|Aldehyde oxidase/xanthine dehydrogenase, molybdopterin binding|CO dehydrogenase flavoprotein, C-terminal|FAD-binding, type 2|Beta-grasp domain|FAD-binding, type 2, subdomain 1|CO dehydrogenase flavoprotein-like, FAD-binding, subdomain 2|Aldehyde oxidase/x…	GO:0009055|GO:0051536|GO:0016491|GO:0055114|GO:0046872|GO:0003824|GO:0016614|GO:0050660|GO:0008762|GO:0005506|GO:0051537	NULL	NULL
Dr15311	GO:0010385|GO:0017111|GO:0008270|GO:0000808|GO:0006355|GO:0006260|GO:0009536|GO:0005524|GO:0009567|GO:0005634	EC:3.6.1.15	origin recognition complex subunit 1-like	IPR020793|IPR003959|IPR019787|IPR001025|IPR027417|IPR011011|IPR013083|IPR001965|IPR003593|IPR019786	Origin recognition complex, subunit 1|ATPase, AAA-type, core|Zinc finger, PHD-finger|Bromo adjacent homology (BAH) domain|P-loop containing nucleoside triphosphate hydrolase|Zinc finger, FYVE/PHD-type|Zinc finger, RING/FYVE/PHD-type|Zinc finger, PHD-type|AAA+ ATPase domain|Zinc finger, PHD-type, conserved site	GO:0000808|GO:0005634|GO:0006260|GO:0005524|GO:0005515|GO:0003677|GO:0008270|GO:0000166|GO:0017111	NULL	NULL
Dr15314	NULL	NULL	NULL	IPR019129	Folate-sensitive fragile site protein Fra10Ac1	NULL	NULL	NULL
Dr15326	NULL	NULL	NULL	NULL	NULL	NULL	NULL	NULL
Dr15330	GO:0008152|GO:0016787|GO:0005739	NULL	protein	IPR002921	Lipase, class 3	GO:0004806|GO:0006629	NULL	Reactome: REACT_14797|Reactome: REACT_604
Dr15331	GO:0016023	NULL	nicotiana lesion-inducing like	IPR008637	HR-like lesion-inducer	NULL	NULL	NULL
Dr15359	NULL	NULL	NULL	IPR001841|IPR013083	Zinc finger, RING-type|Zinc finger, RING/FYVE/PHD-type	GO:0005515|GO:0008270	NULL	NULL
Dr15375	GO:0006470|GO:0000188|GO:0008138|GO:0033549|GO:0044464|GO:0006950	NULL	dual specificity protein phosphatase 1	IPR024950|IPR000340|IPR020422|IPR003595|IPR000387|IPR016130	Dual specificity phosphatase|Dual specificity phosphatase, catalytic domain|Dual specificity phosphatase, subgroup, catalytic domain|Protein-tyrosine phosphatase, catalytic|Protein-tyrosine/Dual specificity phosphatase|Protein-tyrosine phosphatase, active site	GO:0006470|GO:0008138|GO:0016311|GO:0016791|GO:0004725	NULL	NULL
Dr15379	GO:0006511|GO:0004221|GO:0048767|GO:0008242|GO:0008234|GO:0008270|GO:0016579|GO:0009793	EC:3.1.2.15|EC:3.4.19.0	ubiquitin carboxyl-terminal hydrolase	IPR001394|IPR000449|IPR001607|IPR009060|IPR013083|IPR015940|IPR016652|IPR018200	Ubiquitin carboxyl-terminal hydrolases family 2|Ubiquitin-associated domain/translation elongation factor EF-Ts, N-terminal|Zinc finger, UBP-type|UBA-like|Zinc finger, RING/FYVE/PHD-type|Ubiquitin-associated/translation elongation factor EF1B, N-terminal, eukaryote|Ubiquitinyl hydrolase|Peptidase C19, ubiquitin carboxyl-terminal hydrolase 2, conserved site	GO:0004221|GO:0006511|GO:0005515|GO:0008270|GO:0008242	NULL	NULL
Dr15376	GO:0005737|GO:0005730|GO:0035145|GO:0003723|GO:0016604|GO:0000166|GO:0006396	NULL	rna-binding protein 8a	IPR000504|IPR012677|IPR008111	RNA recognition motif domain|RNA-binding motif protein 8|Nucleotide-binding, alpha-beta plait	GO:0003676|GO:0000166|GO:0003723|GO:0005634|GO:0005737|GO:0006396	NULL	NULL
Dr15435	GO:0010026|GO:0031507|GO:0009933|GO:0006355|GO:0000724|GO:0009555|GO:0048366|GO:0006334|GO:0008283|GO:0005634	NULL	transducin wd40 domain-containing protein	IPR001680|IPR017986|IPR015943|IPR019775	WD40 repeat|WD40-repeat-containing domain|WD40/YVTN repeat-like-containing domain|WD40 repeat, conserved site	GO:0005515	NULL	NULL
Dr15391	GO:0003676|GO:0003824	NULL	dna excision repair protein ercc-6-like	IPR000330|IPR001650|IPR027417|IPR014001	SNF2-related|Helicase, C-terminal|P-loop containing nucleoside triphosphate hydrolase|Helicase, superfamily 1/2, ATP-binding domain	GO:0003677|GO:0005524|GO:0003676|GO:0004386	NULL	NULL
Dr15415	GO:0005458|GO:0015784|GO:0005794|GO:0016020|GO:0009536	NULL	gdp-mannose transporter	NULL	NULL	NULL	NULL	NULL
Dr24903	GO:0009536	NULL	uncharacterized protein	NULL	NULL	NULL	NULL	NULL
Dr15437	NULL	NULL	NULL	IPR017986|IPR011047|IPR015943|IPR001680	WD40-repeat-containing domain|Quinonprotein alcohol dehydrogenase-like superfamily|WD40/YVTN repeat-like-containing domain|WD40 repeat	GO:0005515	NULL	NULL
Dr15451	GO:0016020|GO:0005739|GO:0005488	NULL	carbon catabolite repressor protein 4 homolog 6-like	IPR009009|IPR005135|IPR014733	RlpA-like double-psi beta-barrel domain|Endonuclease/exonuclease/phosphatase|Barwin-like endoglucanase	NULL	NULL	NULL
Dr15466	GO:0016020	NULL	uncharacterized protein	IPR002794|IPR013894	Protein of unknown function DUF92, TMEM19|Domain of unknown function DUF1767	GO:0016021	NULL	NULL
Dr15470	GO:0019898|GO:0031977|GO:0005509|GO:0015979|GO:0009535|GO:0009654	NULL	domain-containing protein 5	IPR002683|IPR016123	Photosystem II PsbP, oxygen evolving complex|Mog1/PsbP, alpha/beta/alpha sandwich	GO:0005509|GO:0009523|GO:0009654|GO:0015979|GO:0019898	NULL	NULL
Dr15481	GO:0046872	NULL	ring finger and chy zinc finger domain-containing protein 1	IPR008913|IPR001841|IPR004039|IPR013083	Zinc finger, CHY-type|Zinc finger, RING-type|Rubredoxin-type fold|Zinc finger, RING/FYVE/PHD-type	GO:0008270|GO:0005515	NULL	NULL
Dr15507	NULL	NULL	NULL	NULL	NULL	NULL	NULL	NULL
Dr15515	GO:0005507|GO:0042026|GO:0009408|GO:0005524|GO:0005759|GO:0009507|GO:0046686|GO:0022626|GO:0005886	NULL	chaperonin cpn60-like mitochondrial-like	IPR002423|IPR027409|IPR027413|IPR001844|IPR018370	Chaperonin Cpn60/TCP-1|Chaperonin Cpn60|GroEL-like apical domain|GroEL-like equatorial domain|Chaperonin Cpn60, conserved site	GO:0005524|GO:0044267|GO:0005737|GO:0042026|GO:0006457	NULL	NULL
Dr15518	GO:0042538|GO:0009705|GO:0005886|GO:0005509|GO:2000021|GO:0008152|GO:0003824	NULL	calcineurin b-like protein 10	IPR011992|IPR001125|IPR002048|IPR018247	EF-hand domain pair|Recoverin|EF-hand domain|EF-Hand 1, calcium-binding site	GO:0005509	NULL	NULL
Dr15523	GO:0016020	NULL	uncharacterized membrane	IPR021261	Protein of unknown function DUF2838	NULL	NULL	NULL
Dr15525	NULL	NULL	NULL	IPR018392|IPR019448	LysM domain|EEIG1/EHBP1 N-terminal domain	GO:0016998	NULL	NULL
Dr15528	GO:0048768|GO:0004871|GO:0060151|GO:0016021|GO:0016459|GO:0010154|GO:0042802|GO:0051301|GO:0005524|GO:0003774|GO:0003779|GO:0009791|GO:0051646|GO:0010091|GO:0007165|GO:0051645	NULL	myosin xi-k	IPR001609|IPR000048|IPR018444|IPR004009|IPR027417|IPR002710	Myosin head, motor domain|IQ motif, EF-hand binding site|Dil domain|Myosin, N-terminal, SH3-like|P-loop containing nucleoside triphosphate hydrolase|Dilute	GO:0003774|GO:0005524|GO:0016459|GO:0005515	NULL	NULL
Dr15534	NULL	NULL	NULL	NULL	NULL	NULL	NULL	NULL
Dr15535	GO:0044267|GO:0016853	NULL	peptidyl-prolyl cis-trans isomerase cwc27 homolog	IPR002130|IPR020892	Cyclophilin-like peptidyl-prolyl cis-trans isomerase domain|Cyclophilin-type peptidyl-prolyl cis-trans isomerase, conserved site	GO:0003755|GO:0006457	NULL	NULL
Dr15544	GO:0032259|GO:0005739|GO:0009507|GO:0008168	EC:2.1.1.0	protein	IPR013216	Methyltransferase type 11	GO:0008152|GO:0008168	NULL	NULL
Dr15546	GO:0004747|GO:0006014|GO:0016491|GO:0016310|GO:0009507|GO:0006098	EC:2.7.1.15	ribokinase	IPR011611|IPR002139|IPR017583|IPR002173	Carbohydrate kinase PfkB|Ribokinase|Tagatose/fructose phosphokinase|Carbohydrate/puine kinase, PfkB, conserved site	GO:0004747|GO:0006014|GO:0005975|GO:0016773	NULL	NULL
Dr15439	GO:0016568|GO:0050896|GO:0043229|GO:0050789|GO:0007275	NULL	actin-related protein 6	IPR004000	Actin-related protein	NULL	NULL	NULL
Dr15441	GO:0048609|GO:0004553|GO:0005975|GO:0016023|GO:0044702	EC:3.2.1.0	polygalacturonase	IPR000743|IPR011050|IPR012334	Glycoside hydrolase, family 28|Pectin lyase fold/virulence factor|Pectin lyase fold	GO:0004650|GO:0005975	NULL	NULL
Dr15446	GO:0006367|GO:0005669	NULL	tbp-associated factor 7	IPR006751	TAFII55 protein, conserved region	GO:0005669|GO:0006367	NULL	NULL
Dr15455	NULL	NULL	NULL	NULL	NULL	NULL	NULL	NULL
Dr15464	GO:0009825|GO:0005524|GO:0008568|GO:0043622|GO:0010091|GO:0009832	EC:3.6.4.3	katanin p60 atpase-containing subunit	IPR003959|IPR015415|IPR027417|IPR003593|IPR003960	ATPase, AAA-type, core|Vps4 oligomerisation, C-terminal|P-loop containing nucleoside triphosphate hydrolase|AAA+ ATPase domain|ATPase, AAA-type, conserved site	GO:0005524|GO:0000166|GO:0017111	NULL	NULL
Dr15469	NULL	NULL	NULL	NULL	NULL	NULL	NULL	NULL
Dr15471	GO:0016787|GO:0009507	NULL	nudix hydrolase 24	IPR015797|IPR000086	NUDIX hydrolase domain-like|NUDIX hydrolase domain	GO:0016787	NULL	NULL
Dr15478	GO:0015786|GO:0016021|GO:0005460|GO:0005459|GO:0030968|GO:0072334|GO:0005789	NULL	solute carrier family protein	IPR013657	UAA transporter	GO:0055085	NULL	NULL
Dr15483	GO:0005267|GO:0034220|GO:0005244|GO:0006813|GO:0016020	NULL	potassium channel	IPR000595|IPR005821|IPR021789|IPR018490|IPR014710	Cyclic nucleotide-binding domain|Ion transport domain|Potassium channel, plant-type|Cyclic nucleotide-binding-like|RmlC-like jelly roll fold	GO:0005216|GO:0006811|GO:0016020|GO:0055085	NULL	NULL
Dr15491	GO:0009536	NULL	histidine protein methyltransferase 1 homolog	NULL	NULL	NULL	NULL	NULL
Dr15502	GO:0008152|GO:0003824|GO:0009536	NULL	violaxanthin de-epoxidase-related protein	NULL	NULL	NULL	NULL	NULL
Dr15510	GO:0009536|GO:0016887|GO:0000166|GO:0016020	EC:3.6.1.3	abc transporter retinal flippase subfamily	IPR026082|IPR003439|IPR027417|IPR003593|IPR017871	ABC transporter A, ABCA|ABC transporter-like|P-loop containing nucleoside triphosphate hydrolase|AAA+ ATPase domain|ABC transporter, conserved site	GO:0005524|GO:0016887|GO:0000166|GO:0017111	NULL	NULL
Dr15514	GO:0004553|GO:0043169|GO:0009507|GO:0005975	EC:3.2.1.0	plastid alpha-amylase	IPR015902|IPR006047|IPR012850|IPR017853|IPR013780|IPR013781|IPR006589	Glycoside hydrolase, family 13|Glycosyl hydrolase, family 13, catalytic domain|Alpha-amylase, C-terminal beta-sheet|Glycoside hydrolase, superfamily|Glycosyl hydrolase, family 13, all-beta|Glycoside hydrolase, catalytic domain|Glycosyl hydrolase, family 13, subfamily, catalytic domain	GO:0003824|GO:0005975|GO:0043169|GO:0004556|GO:0005509	EC:3.2.1.1	KEGG: 00500+3.2.1.1|MetaCyc: PWY-842
Dr15516	GO:0009536	NULL	chloroplastic group iia intron splicing facilitator chloroplastic-like	IPR001890	RNA-binding, CRM domain	GO:0003723	NULL	NULL
Dr15527	NULL	NULL	NULL	IPR007918	Mitochondrial distribution/morphology family 35/apoptosis	NULL	NULL	NULL
Dr15532	NULL	NULL	NULL	IPR014898|IPR003604	Zinc finger, C2H2, LYAR-type|Zinc finger, U1-type	GO:0003676|GO:0008270	NULL	NULL
Dr15537	GO:0017119	NULL	conserved oligomeric golgi complex subunit 8-like	IPR007255|IPR016159|IPR016632	Conserved oligomeric Golgi complex subunit 8|Cullin repeat-like-containing domain|Conserved oligomeric Golgi complex subunit 8, Metazoal and Viridiplantae	GO:0017119	NULL	NULL
Dr15538	GO:0016123|GO:0045435|GO:0016120|GO:0016705|GO:0009536	NULL	lycopene epsilon cyclase	IPR008671|IPR010108	Lycopene cyclase-type, FAD-binding|Lycopene cyclase, beta/epsilon	GO:0016117|GO:0016705	NULL	NULL
Dr15542	GO:0009505|GO:0016023|GO:0030246|GO:0004565|GO:0048046|GO:0006012|GO:0006027|GO:0006687|GO:0009341|GO:0046486	EC:3.2.1.23	beta-galactosidase precursor	IPR001944|IPR000922|IPR008979|IPR017853|IPR013781|IPR019801	Glycoside hydrolase, family 35|D-galactoside/L-rhamnose binding SUEL lectin domain|Galactose-binding domain-like|Glycoside hydrolase, superfamily|Glycoside hydrolase, catalytic domain|Glycoside hydrolase, family 35, conserved site	GO:0004553|GO:0005975|GO:0030246|GO:0003824	EC:3.2.1.23	KEGG: 00052+3.2.1.23|KEGG: 00511+3.2.1.23|KEGG: 00531+3.2.1.23|KEGG: 00600+3.2.1.23|KEGG: 00604+3.2.1.23|MetaCyc: PWY-6791|MetaCyc: PWY-6807
Dr15598	GO:0004105|GO:0006657	EC:2.7.7.15	ctp:phosphorylcholine cytidylyltransferase	IPR004821|IPR014729	Cytidyltransferase-like domain|Rossmann-like alpha/beta/alpha sandwich fold	GO:0003824|GO:0009058	NULL	NULL
Dr15567	GO:0016779|GO:0003743|GO:0005840|GO:0006446	EC:2.7.7.0	translation initiation factor eif-2b subunit gamma-like	IPR001451|IPR025877	Bacterial transferase hexapeptide repeat|MobA-like NTP transferase domain	NULL	NULL	NULL
Dr15569	GO:0005840|GO:0003735|GO:0009507|GO:0006412|GO:0019843|GO:0042254	NULL	50s ribosomal protein l34	IPR000271	Ribosomal protein L34	GO:0003735|GO:0005622|GO:0005840|GO:0006412	NULL	NULL
Dr15589	GO:0009543|GO:0019898|GO:0005509|GO:0009570|GO:0015979|GO:0009654	NULL	psbp domain-containing protein chloroplastic-like	IPR002683|IPR016123	Photosystem II PsbP, oxygen evolving complex|Mog1/PsbP, alpha/beta/alpha sandwich	GO:0005509|GO:0009523|GO:0009654|GO:0015979|GO:0019898	NULL	NULL
Dr03761	GO:0005975|GO:0016798	NULL	glycosyl hydrolase family 9 protein	IPR001701|IPR008928|IPR012341	Glycoside hydrolase, family 9|Six-hairpin glycosidase-like|Six-hairpin glycosidase	GO:0004553|GO:0005975|GO:0003824	EC:3.2.1.4	KEGG: 00500+3.2.1.4|MetaCyc: PWY-6788|MetaCyc: PWY-6805
Dr03764	GO:0009737|GO:0046872|GO:0009987|GO:0006508|GO:0008235|GO:0004177	EC:3.4.11.0	protein	IPR000994|IPR003175|IPR001714|IPR002467	Peptidase M24, structural domain|Cyclin-dependent kinase inhibitor|Peptidase M24, methionine aminopeptidase|Peptidase M24A, methionine aminopeptidase, subfamily 1	GO:0009987|GO:0004861|GO:0005634|GO:0007050|GO:0004177|GO:0006508|GO:0008235	NULL	NULL
Dr03766	GO:0046872|GO:0008233|GO:0009941|GO:0046686|GO:0009570|GO:0006508|GO:0048046|GO:0005739	NULL	presequence protease 2	IPR011765|IPR007863|IPR013578|IPR011249|IPR011237	Peptidase M16, N-terminal|Peptidase M16, C-terminal domain|Peptidase M16C associated|Metalloenzyme, LuxS/M16 peptidase-like|Peptidase M16 domain	GO:0006508|GO:0003824|GO:0046872	NULL	NULL
Dr03789	GO:0044249|GO:1901576|GO:0044710|GO:0016638|GO:0005777|GO:0016787	NULL	uncharacterized protein	IPR005645	Serine hydrolase FSH	NULL	NULL	NULL
Dr03803	GO:0016740|GO:0045426|GO:1901663|GO:0016020|GO:0009536	NULL	#NAME?	IPR000537|IPR011937|IPR026046	UbiA prenyltransferase family|1,4-dihydroxy-2-naphthoate phytyltransferase|UbiA prenyltransferase domain containing protein 1	GO:0004659|GO:0016021	EC:2.5.1.-|EC:2.5.1.74	KEGG: 00130+2.5.1.-|KEGG: 00270+2.5.1.-|KEGG: 00361+2.5.1.-|KEGG: 00380+2.5.1.-|KEGG: 00860+2.5.1.-|KEGG: 00920+2.5.1.-|KEGG: 00130+2.5.1.74|MetaCyc: PWY-5839|MetaCyc: PWY-5851|MetaCyc: PWY-5852|MetaCyc: PWY-5853|MetaCyc: PWY-5890|MetaCyc: PWY-5891|MetaCyc: PWY-5892|MetaCyc: PWY-5895
Dr03811	GO:0005739|GO:0016740	NULL	trna (cytosine -c )-methyltransferase-like	IPR001678|IPR023267|IPR023270|IPR018314	Bacterial Fmu (Sun)/eukaryotic nucleolar NOL1/Nop2p|RNA (C5-cytosine) methyltransferase|tRNA (C5-cytosine) methyltransferase, NCL1|Bacterial Fmu (Sun)/eukaryotic nucleolar NOL1/Nop2p, conserved site	GO:0016428|GO:0003723|GO:0008168	NULL	NULL
Dr03762	GO:0016020	NULL	protein	NULL	NULL	NULL	NULL	NULL
Dr03771	GO:0003676|GO:0005634|GO:0008270	NULL	nucleic acid binding	IPR013085|IPR003604|IPR000690	Zinc finger, U1-C type|Zinc finger, U1-type|Zinc finger, C2H2-type matrin	GO:0008270|GO:0003676|GO:0005634	NULL	NULL
Dr03777	GO:0008270|GO:0009507|GO:0004089|GO:0015976|GO:0006730|GO:0006807	EC:4.2.1.1	carbonic anhydrase	IPR001765|IPR015892	Carbonic anhydrase|Carbonic anhydrase, prokaryotic-like, conserved site	GO:0004089|GO:0008270|GO:0015976	EC:4.2.1.1	KEGG: 00910+4.2.1.1|MetaCyc: PWY-6142
Dr03779	NULL	NULL	NULL	IPR023582|IPR001498|IPR020568	Impact family|Impact, N-terminal|Ribosomal protein S5 domain 2-type fold	NULL	NULL	NULL
Dr03782	GO:0005886	NULL	uncharacterized protein	NULL	NULL	NULL	NULL	NULL
Dr03787	GO:0004871|GO:0009785|GO:0009638	NULL	root phototropism protein	IPR027356|IPR011333|IPR000210	NPH3 domain|BTB/POZ fold|BTB/POZ-like	GO:0005515	NULL	UniPathway: UPA00143
Dr03792	GO:0006468|GO:0005524|GO:0004674|GO:0009069	EC:2.7.11.0	serine threonine-protein kinase pepkr2-like	IPR000719|IPR011009|IPR002290|IPR017441|IPR008271	Protein kinase domain|Protein kinase-like domain|Serine/threonine- / dual specificity protein kinase, catalytic domain|Protein kinase, ATP binding site|Serine/threonine-protein kinase, active site	GO:0004672|GO:0005524|GO:0006468|GO:0016772|GO:0004674	NULL	NULL
Dr03794	GO:0006623|GO:0000325|GO:0006896|GO:0005774|GO:0005770|GO:0006944|GO:0005802|GO:0030140|GO:0009630|GO:0005886	NULL	vesicle transport v-snare 13	IPR007705|IPR010989	Vesicle transport v-SNARE, N-terminal|t-SNARE	GO:0006886|GO:0016020|GO:0016192	NULL	NULL
Dr03799	GO:0009536	NULL	letm1-like protein	IPR011685	LETM1-like	NULL	NULL	NULL
Dr03812	GO:0032456|GO:0019900|GO:0007264|GO:0016023|GO:0016787|GO:0015031|GO:0005525|GO:0005886	NULL	ras-related protein rab11d	IPR001806|IPR027417|IPR020849|IPR003578|IPR003579|IPR002041|IPR005225	Small GTPase superfamily|P-loop containing nucleoside triphosphate hydrolase|Small GTPase superfamily, Ras type|Small GTPase superfamily, Rho type|Small GTPase superfamily, Rab type|Ran GTPase|Small GTP-binding protein domain	GO:0005525|GO:0007264|GO:0003924|GO:0006184|GO:0007165|GO:0016020|GO:0005622|GO:0015031|GO:0006886|GO:0006913	NULL	Reactome: REACT_11044
Dr03826	GO:0009705|GO:0006904	NULL	vacuolar protein sorting-associated protein 33-like protein	IPR001619|IPR027121|IPR027482	Sec1-like protein|Vacuolar protein sorting-associated protein 33|Sec1-like, domain 2	GO:0006904|GO:0016192	NULL	NULL
Dr03869	GO:0016020	NULL	amino acid transporter	IPR013057	Amino acid transporter, transmembrane	NULL	NULL	NULL
Dr03870	GO:0043565|GO:0006367|GO:0003743|GO:0005840|GO:0006446	NULL	general transcription factor iie subunit 1-like	IPR024550|IPR011991|IPR013083|IPR002853|IPR017919	TFIIEalpha/SarR/Rpc3 HTH domain|Winged helix-turn-helix DNA-binding domain|Zinc finger, RING/FYVE/PHD-type|Transcription factor TFIIE, alpha subunit|Transcription factor TFE/TFIIEalpha HTH domain	GO:0006367|GO:0043565	NULL	NULL
Dr03898	GO:0005739	NULL	activating signal cointegrator 1-like	IPR007374|IPR015947	ASCH domain|PUA-like domain	NULL	NULL	NULL
Dr15625	NULL	NULL	NULL	IPR003657	DNA-binding WRKY	GO:0003700|GO:0006355|GO:0043565	NULL	NULL
Dr15628	NULL	NULL	NULL	NULL	NULL	NULL	NULL	NULL
Dr15639	GO:0008270|GO:0005622	NULL	protein	IPR015880|IPR001841	Zinc finger, C2H2-like|Zinc finger, RING-type	GO:0005515|GO:0008270	NULL	NULL
Dr15653	GO:0009507|GO:0009790	NULL	uncharacterized protein	NULL	NULL	NULL	NULL	NULL
Dr15669	GO:0016023|GO:0016021	NULL	transmembrane protein 205-like	IPR025423	Domain of unknown function DUF4149	NULL	NULL	NULL
Dr15673	NULL	NULL	NULL	IPR000555|IPR015063	JAB/MPN domain|USP8 dimerisation domain	GO:0005515	NULL	NULL
Dr15681	GO:0003676|GO:0005524|GO:0008026	NULL	pre-mrna-splicing factor atp-dependent rna helicase prp16-like	IPR011545|IPR001650|IPR007502|IPR011709|IPR027417|IPR014001	DNA/RNA helicase, DEAD/DEAH box type, N-terminal|Helicase, C-terminal|Helicase-associated domain|Domain of unknown function DUF1605|P-loop containing nucleoside triphosphate hydrolase|Helicase, superfamily 1/2, ATP-binding domain	GO:0003676|GO:0005524|GO:0008026|GO:0004386	NULL	NULL
Dr15689	GO:0006944|GO:0005795|GO:0006810	NULL	golgi snap receptor complex member 2	IPR027027	GOSR2/Membrin/Bos1	GO:0005795|GO:0006810	NULL	NULL
Dr15691	GO:0016020	NULL	mannose-p-dolichol utilization defect 1 protein	IPR016817|IPR006603	Mannose-P-dolichol utilization defect 1 protein|Cystinosin/ERS1p repeat	NULL	NULL	NULL
Dr15629	GO:0009982|GO:0003723|GO:0001522|GO:0008033	EC:5.4.99.12	trna pseudouridine synthase family protein	IPR001406|IPR020097|IPR020103|IPR020094|IPR020095|IPR004021	Pseudouridine synthase I, TruA|Pseudouridine synthase I, TruA, alpha/beta domain|Pseudouridine synthase, catalytic domain|Pseudouridine synthase I, TruA, N-terminal|Pseudouridine synthase I, TruA, C-terminal|HIN-200/IF120x	GO:0001522|GO:0003723|GO:0009451|GO:0009982	NULL	NULL
Dr15631	GO:0005840|GO:0003735|GO:0006412|GO:0005739|GO:0042254	NULL	50s ribosomal protein l3-2	IPR019927|IPR000597|IPR009000|IPR019926	Ribosomal protein L3, bacterial/organelle-type|Ribosomal protein L3|Translation protein, beta-barrel domain|Ribosomal protein L3, conserved site	GO:0003735|GO:0005622|GO:0005840|GO:0006412	NULL	NULL
Dr15651	GO:0009630|GO:0009687|GO:0010374|GO:0009867|GO:0016020|GO:0010148|GO:0017006|GO:0023014|GO:0009585|GO:0006355|GO:0015979|GO:0010617|GO:0009638|GO:0018298|GO:0009584|GO:0000155|GO:0009649|GO:0010161|GO:0009883|GO:0010202|GO:0010029|GO:0009409|GO:0000160|GO:0031347|GO:0042803|GO:0005634|GO:0005524|GO:0006325|GO:0009365	NULL	phytochrome b	IPR013515|IPR003661|IPR013767|IPR003018|IPR003594|IPR013654|IPR009082|IPR000014|IPR001294|IPR012129|IPR016132|IPR005467|IPR013516	Phytochrome, central region|Signal transduction histidine kinase EnvZ-like, dimerisation/phosphoacceptor domain|PAS fold|GAF domain|Histidine kinase-like ATPase, ATP-binding domain|PAS fold-2|Phytochrome|Signal transduction histidine kinase, homodimeric domain|PAS domain|Phytochrome A/B/C/D/E|Phytochrome chromophore attachment domain|Signal transduction histidine kinase, core|Phytochrome chromoph…	GO:0006355|GO:0009584|GO:0018298|GO:0000155|GO:0007165|GO:0016020|GO:0005515|GO:0005524|GO:0004871|GO:0009585|GO:0009881|GO:0017006|GO:0042803	NULL	Reactome: REACT_1046
Dr15658	GO:0006508|GO:0009570|GO:0008236	NULL	probable glutamyl chloroplastic-like	IPR001375	Peptidase S9, prolyl oligopeptidase, catalytic domain	GO:0006508|GO:0008236	NULL	NULL
Dr15660	GO:0016020	NULL	mitochondrial import inner membrane translocase subunit tim17 tim22 tim23 family protein	IPR003397	Mitochondrial inner membrane translocase subunit Tim17/Tim22/Tim23/peroxisomal protein PMP24	NULL	NULL	NULL
Dr15663	NULL	NULL	NULL	IPR022143|IPR011016|IPR013083	Protein of unknown function DUF3675|Zinc finger, RING-CH-type|Zinc finger, RING/FYVE/PHD-type	GO:0008270	EC:6.3.2.-	KEGG: 00300+6.3.2.-|KEGG: 00380+6.3.2.-|UniPathway: UPA00143
Dr15667	GO:0016020	NULL	neutral amino acid transport protein	IPR002293	Amino acid/polyamine transporter I	GO:0003333|GO:0015171|GO:0016020	NULL	NULL
Dr15672	GO:0005488	NULL	u4 tri-snrnp component	IPR022755|IPR003604	Zinc finger, double-stranded RNA binding|Zinc finger, U1-type	GO:0003676|GO:0008270	NULL	NULL
Dr15674	NULL	NULL	NULL	NULL	NULL	NULL	NULL	NULL
Dr15622	GO:0006351|GO:0044763|GO:0080090|GO:0010468|GO:0009791|GO:0009628|GO:2000112|GO:0044444|GO:0005634|GO:0009733	NULL	indole-3-acetic acid inducible 31	IPR003311|IPR011525	AUX/IAA protein|Aux/IAA-ARF-dimerisation	GO:0005634|GO:0006355|GO:0046983	NULL	NULL
Dr15726	GO:0009706	NULL	uncharacterized protein	IPR021788	Protein of unknown function DUF3353	NULL	NULL	NULL
Dr15728	GO:0004683|GO:0005886|GO:0004713|GO:0005509|GO:0006468|GO:0005524|GO:0009069	EC:2.7.11.17|EC:2.7.10.0	calcium-dependent protein	IPR000719|IPR011009|IPR011992|IPR002290|IPR017441|IPR008271	Protein kinase domain|Protein kinase-like domain|EF-hand domain pair|Serine/threonine- / dual specificity protein kinase, catalytic domain|Protein kinase, ATP binding site|Serine/threonine-protein kinase, active site	GO:0004672|GO:0005524|GO:0006468|GO:0016772|GO:0005509|GO:0004674	NULL	NULL
Dr15731	GO:0004032|GO:0047006|GO:0055114|GO:0009507|GO:0006000|GO:0006012|GO:0006013|GO:0006090|GO:0046486|GO:0008207	EC:1.1.1.21|EC:1.1.1.149	aldo keto reductase family protein	IPR001395|IPR023210|IPR020471|IPR018170	Aldo/keto reductase|NADP-dependent oxidoreductase domain|Aldo/keto reductase subgroup|Aldo/keto reductase, conserved site	GO:0016491|GO:0055114	NULL	NULL
Dr15701	GO:0005886	NULL	integral membrane single c2 domain protein	IPR000008	C2 domain	GO:0005515	NULL	NULL
Dr15743	NULL	NULL	NULL	IPR004910	Yippee/Mis18	NULL	NULL	NULL
Dr15745	GO:0009745|GO:0006109	NULL	impaired sucrose induction 1-like protein	IPR012535|IPR016024|IPR011989	Cell division protein Cdc14|Armadillo-type fold|Armadillo-like helical	GO:0005488	NULL	NULL
Dr15704	GO:0004856|GO:0016310|GO:0009507|GO:0005997	EC:2.7.1.17	xylulose kinase-1	IPR018484|IPR018485	Carbohydrate kinase, FGGY, N-terminal|Carbohydrate kinase, FGGY, C-terminal	GO:0005975|GO:0016773	NULL	NULL
Dr15711	GO:0046872|GO:0016023|GO:0009055|GO:0045454|GO:0051537|GO:0015035|GO:0006118	NULL	glutaredoxin c3	IPR002109|IPR012336|IPR014025|IPR011899	Glutaredoxin|Glutaredoxin subgroup|Thioredoxin-like fold|Glutaredoxin, eukaryotic/virial	GO:0009055|GO:0015035|GO:0045454	NULL	NULL
Dr15713	GO:0046872|GO:0004497	NULL	ferulate-5-hydroxylase	IPR001128|IPR002401|IPR017972	Cytochrome P450|Cytochrome P450, E-class, group I|Cytochrome P450, conserved site	GO:0005506|GO:0016705|GO:0020037|GO:0055114	NULL	Reactome: REACT_13433
Dr15735	GO:0009624|GO:0005886|GO:0034755|GO:0010043|GO:0051980|GO:0010039|GO:0016021|GO:0048316	NULL	metal-nicotianamine transporter ysl3-like	IPR004813	Oligopeptide transporter, OPT superfamily	GO:0055085	NULL	NULL
Dr15741	GO:0006857|GO:0005886|GO:0055085	NULL	oligopeptide transporter opt family	IPR004813|IPR004648	Oligopeptide transporter, OPT superfamily|Tetrapeptide transporter, OPT1/isp4	GO:0055085	NULL	NULL
Dr15719	GO:0046686|GO:0080167|GO:0016491|GO:0000166|GO:0055114	NULL	tropinone reductase homolog at1g07440	IPR016040	NAD(P)-binding domain	NULL	NULL	NULL
Dr15766	NULL	NULL	NULL	IPR022227	Protein of unknown function DUF3754	NULL	NULL	NULL
Dr15769	NULL	NULL	NULL	IPR013244|IPR017986|IPR015943	Secretory pathway Sec39|WD40-repeat-containing domain|WD40/YVTN repeat-like-containing domain	GO:0005515	NULL	NULL
Dr15773	GO:0005739	NULL	kelch motif family protein	IPR015916	Galactose oxidase, beta-propeller	NULL	NULL	NULL
Dr15757	NULL	NULL	NULL	IPR018276	Ubiquitin ligase, Det1/DDB1-complexing	NULL	NULL	NULL
Dr15765	GO:0008171|GO:0032259	NULL	s-adenosyl-l-methionine-dependent methyltransferase-like protein	IPR002935|IPR006747	O-methyltransferase, family 3|Protein of unknown function DUF599	GO:0008171	NULL	NULL
Dr15789	GO:0009793|GO:0003676|GO:0030529	NULL	ribosome production factor 1-like	IPR007109|IPR004154	Brix domain|Anticodon-binding	NULL	NULL	NULL
Dr15813	GO:0043565	NULL	translin-associated protein x-like isoform 1	IPR002848|IPR016068|IPR016069	Translin|Translin, N-terminal|Translin, C-terminal	GO:0043565	NULL	NULL
Dr15814	GO:0005739	NULL	acyl carrier protein	IPR009081|IPR003231|IPR006162	Acyl carrier protein-like|Acyl carrier protein (ACP)|Phosphopantetheine attachment site	GO:0006633	NULL	UniPathway: UPA00094
Dr15820	GO:0005737|GO:0006633|GO:0008235|GO:0016491|GO:0005506|GO:0004177|GO:0016021|GO:0006508|GO:0055114	EC:3.4.11.0	methionine aminopeptidase 2b	IPR002468|IPR000994|IPR011991|IPR001714|IPR018349	Peptidase M24A, methionine aminopeptidase, subfamily 2|Peptidase M24, structural domain|Peptidase M24, methionine aminopeptidase|Winged helix-turn-helix DNA-binding domain|Peptidase M24A, methionine aminopeptidase, subfamily 2, binding site	GO:0004177|GO:0006508|GO:0008235|GO:0009987	NULL	NULL
Dr15833	GO:0009616|GO:0017111|GO:0000166	EC:3.6.1.15	atp-dependent helicase	IPR026127|IPR027417	Probable RNA helicase SDE3|P-loop containing nucleoside triphosphate hydrolase	GO:0009616	NULL	NULL
Dr15841	NULL	NULL	NULL	IPR006716	ERG2/sigma1 receptor-like	GO:0000247|GO:0005783|GO:0006696	NULL	NULL
Dr15830	GO:0009561|GO:0016070|GO:0004004|GO:0003676|GO:0005739|GO:0005524|GO:0009555	NULL	rna helicase like protein	IPR001650|IPR022192|IPR027417	Helicase, C-terminal|Mitochondrial degradasome RNA helicase subunit, C-terminal domain|P-loop containing nucleoside triphosphate hydrolase	GO:0003676|GO:0004386|GO:0005524|GO:0016817	NULL	NULL
Dr24984	GO:0016132|GO:0055114|GO:0016705|GO:0009055|GO:0004497|GO:0016023|GO:0048366|GO:0020037|GO:0005506|GO:0016020|GO:0006118	NULL	cytochrome p450	IPR001128|IPR002401|IPR017972	Cytochrome P450|Cytochrome P450, E-class, group I|Cytochrome P450, conserved site	GO:0005506|GO:0016705|GO:0020037|GO:0055114	NULL	Reactome: REACT_13433
Dr15860	GO:0009536	NULL	protein always early 2-like	IPR010561|IPR028306|IPR001005|IPR009057|IPR017884	Protein LIN-9/Protein ALWAYS EARLY|Protein ALWAYS EARLY, plant|SANT/Myb domain|Homeodomain-like|SANT domain	GO:0006351|GO:0007049|GO:0017053|GO:0003682|GO:0003677	NULL	NULL
Dr15869	GO:0008270|GO:0005739|GO:0006355|GO:0016573|GO:0004402|GO:0000123|GO:0042967	EC:2.3.1.48	histone acetyltransferase	IPR002717|IPR025995|IPR016197|IPR016181|IPR000953	MOZ/SAS-like protein|RNA binding activity-knot of a chromodomain|Chromo domain-like|Acyl-CoA N-acyltransferase|Chromo domain/shadow	GO:0005634|GO:0006355|GO:0016747	NULL	NULL
Dr15871	NULL	NULL	NULL	IPR000073	Alpha/beta hydrolase fold-1	NULL	NULL	NULL
Dr15876	NULL	NULL	NULL	IPR016969	Uncharacterised conserved protein UCP031088, alpha/beta hydrolase, At1g15070	NULL	NULL	NULL
Dr15859	GO:0009536	NULL	dnaj heat shock n-terminal domain-containing	IPR001623|IPR022226	DnaJ domain|Protein of unknown function DUF3752	NULL	NULL	NULL
Dr15861	GO:0016020	NULL	high affinity nitrate transporter	IPR011701|IPR016196	Major facilitator superfamily|Major facilitator superfamily domain, general substrate transporter	GO:0016021|GO:0055085	NULL	NULL
Dr15863	NULL	NULL	NULL	IPR001683|IPR025258	Phox homologous domain|Domain of unknown function DUF4206	GO:0005515|GO:0007154|GO:0035091	NULL	NULL
Dr15866	NULL	NULL	NULL	NULL	NULL	NULL	NULL	NULL
Dr15903	GO:0031167|GO:0008168|GO:0009536	EC:2.1.1.0	protein	IPR004398	RNA methyltransferase, RsmD	GO:0008168|GO:0031167	NULL	NULL
Dr15907	GO:0005747	NULL	uncharacterized protein	NULL	NULL	NULL	NULL	NULL
Dr15916	GO:0006468|GO:0005524|GO:0004674|GO:0009069	EC:2.7.11.0	at1g04210	IPR000719|IPR025875|IPR011009|IPR002290|IPR003591|IPR001611|IPR008271	Protein kinase domain|Leucine rich repeat 4|Protein kinase-like domain|Serine/threonine- / dual specificity protein kinase, catalytic domain|Leucine-rich repeat, typical subtype|Leucine-rich repeat|Serine/threonine-protein kinase, active site	GO:0004672|GO:0005524|GO:0006468|GO:0016772|GO:0005515|GO:0004674	NULL	NULL
Dr15902	NULL	NULL	NULL	NULL	NULL	NULL	NULL	NULL
Dr15926	GO:0009536	NULL	uncharacterized protein	NULL	NULL	NULL	NULL	NULL
Dr15975	GO:0008152|GO:0008168|GO:0009536	EC:2.1.1.0	#NAME?	IPR002905	tRNA (guanine(26)-N(2))-dimethyltransferase	GO:0003723|GO:0004809|GO:0008033	NULL	MetaCyc: PWY-6829
Dr15979	GO:0016020|GO:0005783	NULL	reticulon-like protein b16	IPR003388	Reticulon	NULL	NULL	NULL
Dr15988	GO:0009536	NULL	defects in morphology protein	IPR019190	Exonuclease V	GO:0045145	NULL	NULL
Dr15996	GO:0003676|GO:0000166	NULL	rna recognition motif-containing protein	IPR000504|IPR012677	RNA recognition motif domain|Nucleotide-binding, alpha-beta plait	GO:0003676|GO:0000166	NULL	NULL
Dr16006	NULL	NULL	NULL	IPR018627	Uncharacterised protein family UPF0405	NULL	NULL	NULL
Dr16009	NULL	NULL	NULL	NULL	NULL	NULL	NULL	NULL
Dr16020	NULL	NULL	NULL	IPR001005|IPR009057|IPR017884	SANT/Myb domain|Homeodomain-like|SANT domain	GO:0003682|GO:0003677	NULL	NULL
Dr16022	NULL	NULL	NULL	IPR011011|IPR000967|IPR019787|IPR001841|IPR019786	Zinc finger, FYVE/PHD-type|Zinc finger, NF-X1-type|Zinc finger, PHD-finger|Zinc finger, RING-type|Zinc finger, PHD-type, conserved site	GO:0003700|GO:0005634|GO:0006355|GO:0008270|GO:0005515	NULL	NULL
Dr16024	GO:0009536	NULL	symplekin	IPR021850|IPR022075|IPR016024|IPR011989	Protein of unknown function DUF3453|Symplekin C-terminal|Armadillo-type fold|Armadillo-like helical	GO:0005488	NULL	NULL
Dr16027	GO:0016706|GO:0044710	EC:1.14.11.0	2og-fe oxygenase family protein	IPR005123|IPR026992|IPR027443	Oxoglutarate/iron-dependent dioxygenase|Non-haem dioxygenase N-terminal domain|Isopenicillin N synthase-like	GO:0016491|GO:0016706|GO:0055114	NULL	NULL
Dr16029	GO:0005488|GO:0016740	NULL	chromodomain helicase-dna-binding protein	IPR019787|IPR016181|IPR011011|IPR013083|IPR001965|IPR000182	Zinc finger, PHD-finger|Acyl-CoA N-acyltransferase|Zinc finger, FYVE/PHD-type|Zinc finger, RING/FYVE/PHD-type|Zinc finger, PHD-type|GNAT domain	GO:0005515|GO:0008270|GO:0008080	NULL	NULL
Dr16031	GO:0016023|GO:0009620	NULL	uncharacterized protein	IPR026057|IPR025846	PC-Esterase|PMR5 N-terminal domain	NULL	NULL	NULL
Dr16033	GO:0009409	NULL	uncharacterized protein	IPR026057|IPR025846	PC-Esterase|PMR5 N-terminal domain	NULL	NULL	NULL
Dr16036	GO:0046408|GO:0030494|GO:0031969|GO:0016021|GO:0005739	EC:2.5.1.62	chlorophyll synthase	IPR000537|IPR006372|IPR011799	UbiA prenyltransferase family|Bacteriochlorophyll/chlorophyll synthetase|Chlorophyll synthase, ChlG	GO:0004659|GO:0016021|GO:0015995|GO:0046408	EC:2.5.1.-|EC:2.5.1.62	KEGG: 00130+2.5.1.-|KEGG: 00270+2.5.1.-|KEGG: 00361+2.5.1.-|KEGG: 00380+2.5.1.-|KEGG: 00860+2.5.1.-|KEGG: 00920+2.5.1.-|KEGG: 00860+2.5.1.62|MetaCyc: PWY-5068|MetaCyc: PWY-5086
Dr16041	GO:0055114|GO:0009408|GO:0016491|GO:0016023|GO:0005788|GO:0009860	NULL	domain containing expressed	IPR001623|IPR012336|IPR018253	DnaJ domain|Thioredoxin-like fold|DnaJ domain, conserved site	NULL	NULL	NULL
Dr16043	GO:0008152	NULL	transcription factor bhlh140-like	IPR001310|IPR002589|IPR027417|IPR011146	Histidine triad (HIT) protein|Macro domain|P-loop containing nucleoside triphosphate hydrolase|HIT-like domain	GO:0003824	NULL	NULL
Dr16045	GO:0006000|GO:0004331|GO:0003873|GO:0005886|GO:0016310|GO:0006003|GO:0005524|GO:2001070|GO:0005829|GO:0006013	EC:3.1.3.46|EC:2.7.1.105	fructose-6-phosphate-2-kinase fructose- -bisphosphatase	IPR003094|IPR013078|IPR002044|IPR013079|IPR013784|IPR027417|IPR013783|IPR001345	Fructose-2,6-bisphosphatase|Histidine phosphatase superfamily, clade-1|Carbohydrate binding module family 20|6-phosphofructo-2-kinase|Carbohydrate-binding-like fold|P-loop containing nucleoside triphosphate hydrolase|Immunoglobulin-like fold|Phosphoglycerate/bisphosphoglycerate mutase, active site	GO:0003824|GO:0005524|GO:0006003|GO:2001070|GO:0003873|GO:0006000|GO:0030246|GO:0008152	EC:2.7.1.105+3.1.3.46	KEGG: 00051+2.7.1.105+3.1.3.46|Reactome: REACT_474|UniPathway: UPA00109
Dr16059	GO:0016023	NULL	gdsl esterase lipase	IPR001087|IPR013831	Lipase, GDSL|SGNH hydrolase-type esterase domain	GO:0006629|GO:0016788|GO:0016787	NULL	NULL
Dr16061	GO:0009536	NULL	pentatricopeptide repeat-containing protein chloroplastic-like	NULL	NULL	NULL	NULL	NULL
Dr15958	GO:0030170|GO:0008453|GO:0005739|GO:0006522|GO:0006531|GO:0006544|GO:0006563|GO:0006566	EC:2.6.1.44	alanine--glyoxylate aminotransferase 2 homolog mitochondrial-like	IPR005814|IPR015424|IPR015421|IPR015422	Aminotransferase class-III|Pyridoxal phosphate-dependent transferase|Pyridoxal phosphate-dependent transferase, major region, subdomain 1|Pyridoxal phosphate-dependent transferase, major region, subdomain 2	GO:0008483|GO:0030170|GO:0003824	NULL	NULL
Dr15959	GO:0009536|GO:0051213	NULL	2-oxoglutarate-dependent dioxygenase family protein	IPR027450|IPR005123	Alpha-ketoglutarate-dependent dioxygenase AlkB-like|Oxoglutarate/iron-dependent dioxygenase	GO:0016491|GO:0016706|GO:0055114	NULL	NULL
Dr15972	GO:0004853|GO:0009941|GO:0006782|GO:0015995|GO:0009570	EC:4.1.1.37	uroporphyrinogen decarboxylase	IPR000257|IPR009071|IPR006361	Uroporphyrinogen decarboxylase (URO-D)|High mobility group box domain|Uroporphyrinogen decarboxylase HemE	GO:0004853|GO:0006779	EC:4.1.1.37	KEGG: 00860+4.1.1.37|MetaCyc: PWY-5531|MetaCyc: PWY-7159|UniPathway: UPA00251
Dr15977	GO:0005507|GO:0055114|GO:0009651|GO:0042742|GO:0004784|GO:0005759|GO:0010043|GO:0019430|GO:0009793	EC:1.15.1.1	superoxide dismutase	IPR001189|IPR019831|IPR019832	Manganese/iron superoxide dismutase|Manganese/iron superoxide dismutase, N-terminal|Manganese/iron superoxide dismutase, C-terminal	GO:0004784|GO:0006801|GO:0046872|GO:0055114	NULL	MetaCyc: PWY-6854
Dr15989	NULL	NULL	NULL	IPR000048|IPR025064	IQ motif, EF-hand binding site|Domain of unknown function DUF4005	GO:0005515	NULL	NULL
Dr15990	GO:0016757|GO:0071554	NULL	glycosyl transferase	IPR005027	Glycosyl transferase, family 43	GO:0015018|GO:0016020	NULL	NULL
Dr16002	GO:0005739	NULL	protein	IPR003734	Protein of unknown function DUF155	NULL	NULL	NULL
Dr16008	GO:0016020|GO:0009536	NULL	uncharacterized membrane protein stkorf319-like	IPR005496|IPR022369	Integral membrane protein TerC|Integral membrane protein TerC, riboswitch-linked	GO:0016021	NULL	NULL
Dr16016	GO:0055114|GO:0006552|GO:0005524|GO:0008470|GO:0050660|GO:0005759|GO:0006118|GO:0006550|GO:0006574	EC:1.3.99.10	isovaleryl- dehydrogenase	IPR009075|IPR006091|IPR013786|IPR009100|IPR006089	Acyl-CoA dehydrogenase/oxidase C-terminal|Acyl-CoA oxidase/dehydrogenase, central domain|Acyl-CoA dehydrogenase/oxidase, N-terminal|Acyl-CoA dehydrogenase/oxidase, N-terminal and middle domain|Acyl-CoA dehydrogenase, conserved site	GO:0016627|GO:0055114|GO:0003995|GO:0008152|GO:0050660	NULL	NULL
Dr16035	GO:0032264|GO:0003876|GO:0005829|GO:0016021|GO:0046872|GO:0009737|GO:0005634|GO:0009793|GO:0006144	EC:3.5.4.6	amp deaminase	IPR006329|IPR001365|IPR006650	AMP deaminase|Adenosine/AMP deaminase domain|Adenosine/AMP deaminase active site	GO:0003876|GO:0006188|GO:0009168|GO:0019239	EC:3.5.4.6	KEGG: 00230+3.5.4.6|MetaCyc: PWY-6596|Reactome: REACT_1698|UniPathway: UPA00591|Reactome: REACT_1698
Dr16040	GO:0005643|GO:0016023|GO:0008565|GO:0006886	NULL	armadillo beta-catenin-like repeat-containing protein	IPR001494|IPR016024|IPR011989	Importin-beta, N-terminal domain|Armadillo-type fold|Armadillo-like helical	GO:0006886|GO:0008536|GO:0005488	NULL	NULL
Dr16057	GO:0016491|GO:0006829|GO:0055085|GO:0016020|GO:0008270|GO:0005385	NULL	zip transporter	IPR003689|IPR004698	Zinc/iron permease|Zinc/iron permease, fungal/plant	GO:0016020|GO:0030001|GO:0046873|GO:0055085|GO:0005385|GO:0016021|GO:0071577	NULL	NULL
Dr16072	GO:0017004|GO:0016021|GO:0009535	NULL	cytochrome c biogenesis protein chloroplastic-like	IPR007816|IPR023494	ResB-like domain|Cytochrome c biogenesis protein Ccs1/CcsB	NULL	NULL	NULL
Dr16075	GO:0009941|GO:0000312|GO:0003735|GO:0009570|GO:0016020|GO:0006412|GO:0019843|GO:0042254	NULL	ribosomal protein s9	IPR000754|IPR020568|IPR014721|IPR020574|IPR023035	Ribosomal protein S9|Ribosomal protein S5 domain 2-type fold|Ribosomal protein S5 domain 2-type fold, subgroup|Ribosomal protein S9, conserved site|Ribosomal protein S9, bacterial/plastid	GO:0003735|GO:0005840|GO:0006412	NULL	NULL
Dr16088	GO:0005739	NULL	uncharacterized protein	IPR024875	Protein Lines	NULL	NULL	NULL
Dr16091	GO:0051287|GO:0005507|GO:0055114|GO:0006526|GO:0005730|GO:0003942|GO:0046983|GO:0009570|GO:0046686|GO:0016020|GO:0000051	EC:1.2.1.38	n-acetyl-gamma-glutamyl-phosphate reductase	IPR000534|IPR012280|IPR016040|IPR000706|IPR023013	Semialdehyde dehydrogenase, NAD-binding|Semialdehyde dehydrogenase, dimerisation domain|NAD(P)-binding domain|N-acetyl-gamma-glutamyl-phosphate reductase, type 1|N-acetyl-gamma-glutamyl-phosphate reductase, active site	GO:0016620|GO:0051287|GO:0055114|GO:0003942|GO:0005737|GO:0008652|GO:0046983|GO:0006526	EC:1.2.1.38	KEGG: 00330+1.2.1.38|MetaCyc: PWY-5154|UniPathway: UPA00068
Dr16097	GO:0009414|GO:0006952|GO:0043531|GO:0051707|GO:0048046|GO:0080167	NULL	nbs-lrr resistance protein	IPR001611|IPR002182|IPR027417|IPR000767|IPR008808	Leucine-rich repeat|NB-ARC|Disease resistance protein|P-loop containing nucleoside triphosphate hydrolase|Powdery mildew resistance protein, RPW8 domain	GO:0005515|GO:0043531|GO:0006952	NULL	NULL
Dr16101	NULL	NULL	NULL	IPR019605|IPR003008	Misato Segment II tubulin-like domain|Tubulin/FtsZ, GTPase domain	NULL	NULL	NULL
Dr16122	GO:0009536	NULL	seed maturation protein expressed	IPR008479	Protein of unknown function DUF760	NULL	NULL	NULL
Dr16123	NULL	NULL	NULL	IPR007303	TIP41-like protein	NULL	NULL	NULL
Dr16147	GO:0016020	NULL	uncharacterized protein	IPR018781	Uncharacterised protein family, transmembrane-40	NULL	NULL	NULL
Dr16148	NULL	NULL	NULL	IPR011011|IPR013083	Zinc finger, FYVE/PHD-type|Zinc finger, RING/FYVE/PHD-type	NULL	NULL	NULL
Dr16150	GO:0016311|GO:0009507|GO:0004647|GO:0006564|GO:0006544|GO:0006566	EC:3.1.3.3	phosphoserine phosphatase	IPR023214|IPR023190|IPR004469|IPR006383	HAD-like domain|Phosphoserine phosphatase, domain 2|Phosphoserine phosphatase SerB|HAD-superfamily hydrolase, subfamily IB, PSPase-like	GO:0004647|GO:0006564|GO:0008152|GO:0016791	EC:3.1.3.3	KEGG: 00260+3.1.3.3|KEGG: 00680+3.1.3.3|UniPathway: UPA00135
Dr16161	GO:0016023|GO:0008152|GO:0005739	NULL	asparagine synthetase domain-containing protein 1-like	IPR001962|IPR000583|IPR014729	Asparagine synthase|Class II glutamine amidotransferase domain|Rossmann-like alpha/beta/alpha sandwich fold	GO:0004066|GO:0006529|GO:0008152	NULL	NULL
Dr16184	GO:0016020|GO:0006875|GO:0055085	NULL	oligopeptide transporter opt family	IPR004813|IPR004648	Oligopeptide transporter, OPT superfamily|Tetrapeptide transporter, OPT1/isp4	GO:0055085	NULL	NULL
Dr16189	GO:0003002|GO:0009653|GO:1901363|GO:0048513|GO:0044767|GO:0097159	NULL	heterogeneous nuclear ribonucleoprotein	IPR001806|IPR000504|IPR027417|IPR012677|IPR020849|IPR003578|IPR003579|IPR002041|IPR005225	Small GTPase superfamily|RNA recognition motif domain|P-loop containing nucleoside triphosphate hydrolase|Nucleotide-binding, alpha-beta plait|Small GTPase superfamily, Ras type|Small GTPase superfamily, Rho type|Small GTPase superfamily, Rab type|Ran GTPase|Small GTP-binding protein domain	GO:0005525|GO:0007264|GO:0003676|GO:0000166|GO:0003924|GO:0006184|GO:0007165|GO:0016020|GO:0005622|GO:0015031|GO:0006886|GO:0006913	NULL	Reactome: REACT_11044
Dr16192	GO:0004871|GO:0005095|GO:0009749|GO:0042127|GO:0042388|GO:0051020|GO:0005834|GO:0005525|GO:0005789|GO:0006184|GO:0006571|GO:0046872|GO:0031683|GO:0009094|GO:0016247|GO:0009845|GO:0010244|GO:0008219|GO:0003924|GO:0006952|GO:0001789|GO:0009789|GO:0010027|GO:0005742|GO:0006810	NULL	g protein alpha subunit	IPR001019|IPR002976|IPR011025|IPR027417	Guanine nucleotide binding protein (G-protein), alpha subunit|Plant G-protein, alpha subunit|G protein alpha subunit, helical insertion|P-loop containing nucleoside triphosphate hydrolase	GO:0003924|GO:0004871|GO:0007186|GO:0019001|GO:0031683|GO:0005525|GO:0006184|GO:0007165	NULL	Reactome: REACT_14797
Dr16077	GO:0016020|GO:0005739	NULL	casp-like protein at3g50810-like	IPR006702	Uncharacterised protein family UPF0497, trans-membrane plant	NULL	NULL	NULL
Dr16081	GO:0005739	NULL	uncharacterized protein	IPR026847|IPR009543	Vacuolar protein sorting-associated protein 13|Vacuolar protein sorting-associated protein 13 domain	NULL	NULL	NULL
Dr16102	GO:0048441|GO:0009965|GO:0009954	NULL	lob domain-containing protein 36-like	IPR004883	Lateral organ boundaries, LOB	NULL	NULL	NULL
Dr16104	NULL	NULL	NULL	IPR024741|IPR016024|IPR011989	Condensin-2 complex subunit G2|Armadillo-type fold|Armadillo-like helical	GO:0005634|GO:0005488	NULL	NULL
Dr16107	NULL	NULL	NULL	IPR013083	Zinc finger, RING/FYVE/PHD-type	NULL	NULL	NULL
Dr16114	GO:0035246|GO:0030731|GO:0016274|GO:0006525|GO:0006544|GO:0006560|GO:0006563|GO:0006566	EC:2.1.1.2	arginine n-methyltransferase	IPR020683|IPR002110|IPR026480	Ankyrin repeat-containing domain|Ankyrin repeat|Arginine N-methyltransferase 2-like domain	GO:0005515	NULL	NULL
Dr16125	GO:0046686|GO:0004475|GO:0005777|GO:0009058|GO:0006000|GO:0006013	EC:2.7.7.13	adp-glucose pyrophosphorylase-like protein	IPR001451|IPR005835|IPR011004	Bacterial transferase hexapeptide repeat|Nucleotidyl transferase|Trimeric LpxA-like	GO:0009058|GO:0016779	NULL	Reactome: REACT_17015
Dr16136	GO:0005739	NULL	uncharacterized protein	IPR003734	Protein of unknown function DUF155	NULL	NULL	NULL
Dr16144	NULL	NULL	NULL	IPR005351	Uncharacterised protein family UPF0139	NULL	NULL	NULL
Dr16153	GO:0009295|GO:0000712|GO:0000819|GO:0006261|GO:0000795|GO:0006312|GO:0005524|GO:0003918|GO:0006265	EC:5.99.1.3	dna topoisomerase ii	IPR013506|IPR002205|IPR006171|IPR003594|IPR020568|IPR013760|IPR013757|IPR024946|IPR014721|IPR013759|IPR013758|IPR001241|IPR001154|IPR018522	DNA topoisomerase, type IIA, subunit B, domain 2|DNA topoisomerase, type IIA, subunit A/C-terminal|Toprim domain|Histidine kinase-like ATPase, ATP-binding domain|DNA topoisomerase, type IIA|DNA topoisomerase II, eukaryotic-type|Ribosomal protein S5 domain 2-type fold|DNA topoisomerase, type IIA-like domain|Type IIA DNA topoisomerase subunit A, alpha-helical domain|Arginine repressor C-terminal-li…	GO:0003677|GO:0003918|GO:0005524|GO:0006265|GO:0006259	NULL	NULL
Dr16157	GO:0047389|GO:0006071|GO:0005773|GO:0016023|GO:0008889|GO:0009395|GO:0046486	EC:3.1.4.2|EC:3.1.4.46	glycerophosphoryl diester phosphodiesterase	IPR004129|IPR017946	Glycerophosphoryl diester phosphodiesterase|PLC-like phosphodiesterase, TIM beta/alpha-barrel domain	GO:0006071|GO:0008889|GO:0006629|GO:0008081	NULL	NULL
Dr16160	NULL	NULL	NULL	NULL	NULL	NULL	NULL	NULL
Dr16166	GO:0016020|GO:0005739|GO:0008233	NULL	protein	IPR002610|IPR022764	Peptidase S54, rhomboid|Peptidase S54, rhomboid domain	GO:0004252|GO:0006508|GO:0016021	NULL	NULL
Dr16167	GO:0000325|GO:0005774|GO:0043190|GO:0010044|GO:0016021|GO:0008559|GO:0015421|GO:0006200|GO:0005886|GO:0005524|GO:0006855|GO:0006857	EC:3.6.3.44|EC:3.6.3.23	abc transporter family protein	IPR003439|IPR001140|IPR027417|IPR011527|IPR003593|IPR017871	ABC transporter-like|ABC transporter, transmembrane domain|P-loop containing nucleoside triphosphate hydrolase|ABC transporter type 1, transmembrane domain|AAA+ ATPase domain|ABC transporter, conserved site	GO:0005524|GO:0016887|GO:0006810|GO:0016021|GO:0042626|GO:0055085|GO:0000166|GO:0017111	NULL	NULL
Dr16171	NULL	NULL	NULL	IPR001680|IPR017986|IPR015943	WD40 repeat|WD40-repeat-containing domain|WD40/YVTN repeat-like-containing domain	GO:0005515	NULL	NULL
Dr16172	GO:0005743|GO:0055085|GO:0016021|GO:0004420|GO:0055114|GO:0006694	EC:1.1.1.34	mitochondrial carrier protein	IPR018108|IPR023395|IPR002067	Mitochondrial substrate/solute carrier|Mitochondrial carrier protein|Mitochondrial carrier domain	GO:0055085	NULL	NULL
Dr16174	GO:0003676|GO:0000166	NULL	peptidyl-prolyl cis-trans isomerase e	IPR000504|IPR012677	RNA recognition motif domain|Nucleotide-binding, alpha-beta plait	GO:0003676|GO:0000166	NULL	NULL
Dr16181	GO:0000160|GO:0009585|GO:0017006|GO:0006355|GO:0018298|GO:0009584|GO:0023014|GO:0005524|GO:0042803|GO:0009881|GO:0016020|GO:0000155|GO:0009365	NULL	phytochrome c	IPR013515|IPR003661|IPR013767|IPR003018|IPR003594|IPR013654|IPR000014|IPR001294|IPR012129|IPR016132|IPR005467|IPR013516	Phytochrome, central region|Signal transduction histidine kinase EnvZ-like, dimerisation/phosphoacceptor domain|PAS fold|GAF domain|Histidine kinase-like ATPase, ATP-binding domain|PAS fold-2|Phytochrome|PAS domain|Phytochrome A/B/C/D/E|Phytochrome chromophore attachment domain|Signal transduction histidine kinase, core|Phytochrome chromophore binding site	GO:0006355|GO:0009584|GO:0018298|GO:0000155|GO:0007165|GO:0016020|GO:0005515|GO:0005524|GO:0004871|GO:0009585|GO:0009881|GO:0017006|GO:0042803	NULL	Reactome: REACT_1046
Dr16187	GO:0009705|GO:0016192|GO:0006886|GO:0008270	NULL	vacuolar protein sorting-associated protein 11 homolog	IPR000547|IPR024763|IPR016024|IPR017986|IPR011990|IPR015943|IPR013083|IPR016528|IPR001841	Clathrin, heavy chain/VPS, 7-fold repeat|Vacuolar protein sorting protein 11, C-terminal|Armadillo-type fold|WD40-repeat-containing domain|Tetratricopeptide-like helical|WD40/YVTN repeat-like-containing domain|Zinc finger, RING/FYVE/PHD-type|Vacuolar protein sorting-associated protein 11|Zinc finger, RING-type	GO:0006886|GO:0016192|GO:0005488|GO:0005515|GO:0008270	NULL	NULL
Dr16190	GO:0016829|GO:0009536	NULL	decarboxylase family protein	IPR005269	Cytokinin riboside 5'-monophosphate phosphoribohydrolase LOG	NULL	NULL	NULL
Dr25034	GO:0005886	NULL	uncharacterized protein	IPR008506	Protein of unknown function DUF788, TMEM208	NULL	NULL	NULL
Dr16201	GO:0003676|GO:0009536|GO:0008859|GO:0051252	EC:3.1.13.1	rna exonuclease 4-like	IPR013520|IPR012337|IPR006055	Exonuclease, RNase T/DNA polymerase III|Ribonuclease H-like domain|Exonuclease	GO:0003676|GO:0004527	NULL	NULL
Dr16278	GO:0009536|GO:0006396	NULL	crs2-associated factor 1	IPR001890	RNA-binding, CRM domain	GO:0003723	NULL	NULL
Dr16285	GO:0016020|GO:0005773|GO:0050896|GO:0005261|GO:0006812|GO:0050794|GO:0055085	NULL	two-pore calcium channel	IPR005821|IPR011992|IPR027359|IPR023393|IPR002048	Ion transport domain|EF-hand domain pair|Voltage-dependent channel, four helix bundle domain|START-like domain|EF-hand domain	GO:0005216|GO:0006811|GO:0016020|GO:0055085|GO:0005509	NULL	NULL
Dr16287	GO:0044464	NULL	26s proteasome non-atpase regulatory subunit 5	IPR019538|IPR016024	26S proteasome non-ATPase regulatory subunit 5|Armadillo-type fold	GO:0044183|GO:0005488	NULL	NULL
Dr16295	GO:0016020|GO:0016023	NULL	dopamine beta-	IPR004877|IPR005018|IPR006593	Cytochrome b561, eukaryote|DOMON domain|Cytochrome b561/ferric reductase transmembrane	GO:0016021	NULL	NULL
Dr16296	NULL	NULL	NULL	IPR000253|IPR008984	Forkhead-associated (FHA) domain|SMAD/FHA domain	GO:0005515	NULL	NULL
Dr16316	GO:0006807|GO:0044237	NULL	protein nlp6-like	IPR000270|IPR003035	Phox/Bem1p|RWP-RK domain	GO:0005515	NULL	NULL
Dr16221	GO:0044444|GO:0043229|GO:0016740	NULL	phospho-n-acetylmuramoyl-pentapeptide-transferase homolog	IPR000715|IPR003524|IPR018480	Glycosyl transferase, family 4|Phospho-N-acetylmuramoyl-pentapeptide transferase|Phospho-N-acetylmuramoyl-pentapeptide transferase, conserved site	GO:0008963|GO:0016021|GO:0016020	EC:2.7.8.13	KEGG: 00550+2.7.8.13|MetaCyc: PWY-5265|MetaCyc: PWY-6470|MetaCyc: PWY-6471|UniPathway: UPA00219
Dr16323	GO:0009536	NULL	meiosis expressed	NULL	NULL	NULL	NULL	NULL
Dr16247	GO:0005739	NULL	transcriptional regulator family	IPR012479	SAP30-binding protein	GO:0006355	NULL	NULL
Dr16248	GO:0055085|GO:0016020|GO:0005215	NULL	nucleobase ascorbate transporter	IPR006043	Xanthine/uracil/vitamin C permease	GO:0005215|GO:0006810|GO:0016020|GO:0055085	NULL	NULL
Dr16250	GO:0005886|GO:0006468|GO:0005524|GO:0004674|GO:0009069	EC:2.7.11.0	protein kinase family protein	IPR001245|IPR011009|IPR013320|IPR000719|IPR017441|IPR008271	Serine-threonine/tyrosine-protein kinase catalytic domain|Protein kinase-like domain|Concanavalin A-like lectin/glucanase, subgroup|Protein kinase domain|Protein kinase, ATP binding site|Serine/threonine-protein kinase, active site	GO:0004672|GO:0006468|GO:0016772|GO:0005524|GO:0004674	NULL	NULL
Dr16256	GO:0008026|GO:0003723|GO:0005524|GO:0008270	NULL	dead-box protein abstrakt	IPR011545|IPR001650|IPR027417|IPR001878|IPR014001	DNA/RNA helicase, DEAD/DEAH box type, N-terminal|Helicase, C-terminal|P-loop containing nucleoside triphosphate hydrolase|Zinc finger, CCHC-type|Helicase, superfamily 1/2, ATP-binding domain	GO:0003676|GO:0005524|GO:0008026|GO:0004386|GO:0008270	NULL	NULL
Dr16257	NULL	NULL	NULL	NULL	NULL	NULL	NULL	NULL
Dr16205	NULL	NULL	NULL	NULL	NULL	NULL	NULL	NULL
Dr16261	GO:0016491|GO:0005886|GO:0005759|GO:0055114|GO:0000166	NULL	nadph:adrenodoxin mitochondrial	IPR016040|IPR021163	NAD(P)-binding domain|Adrenodoxin-NADP+ reductase	GO:0016491|GO:0055114	NULL	NULL
Dr16263	GO:0016614	NULL	l-gulonolactone oxidase-like	IPR006094|IPR007173|IPR016166|IPR016169|IPR010030	FAD linked oxidase, N-terminal|D-arabinono-1,4-lactone oxidase|FAD-binding, type 2|CO dehydrogenase flavoprotein-like, FAD-binding, subdomain 2|Plant-specific FAD-dependent oxidoreductase	GO:0008762|GO:0016491|GO:0050660|GO:0055114|GO:0003885|GO:0016020|GO:0003824|GO:0016614	EC:1.3.1.98	KEGG: 00520+1.3.1.98|KEGG: 00550+1.3.1.98|MetaCyc: PWY-6386|MetaCyc: PWY-6387|UniPathway: UPA00219
Dr16267	GO:0046872|GO:0009409|GO:0031977|GO:0010319|GO:0009570|GO:0004462|GO:0005975|GO:0006090	EC:4.4.1.5	probable lactoylglutathione chloroplast-like	IPR004360|IPR004361|IPR018146	Glyoxalase/fosfomycin resistance/dioxygenase domain|Glyoxalase I|Glyoxalase I, conserved site	GO:0004462|GO:0046872	EC:4.4.1.5	KEGG: 00620+4.4.1.5|MetaCyc: PWY-5386|UniPathway: UPA00619
Dr16268	GO:0044260|GO:0043412|GO:0032259|GO:0008168|GO:0044238	EC:2.1.1.0	7sk snrna methylphosphate capping enzyme	IPR010675|IPR024160	Bicoid-interacting 3|Bin3-type S-adenosyl-L-methionine binding domain	GO:0008168	EC:2.1.1.-	KEGG: 00130+2.1.1.-|KEGG: 00253+2.1.1.-|KEGG: 00270+2.1.1.-|KEGG: 00340+2.1.1.-|KEGG: 00350+2.1.1.-|KEGG: 00360+2.1.1.-|KEGG: 00380+2.1.1.-|KEGG: 00450+2.1.1.-|KEGG: 00522+2.1.1.-|KEGG: 00624+2.1.1.-|KEGG: 00627+2.1.1.-|KEGG: 00860+2.1.1.-|KEGG: 00940+2.1.1.-|KEGG: 00941+2.1.1.-|KEGG: 00942+2.1.1.-|KEGG: 00945+2.1.1.-|KEGG: 00950+2.1.1.-|KEGG: 00981+2.1.1.-
Dr16269	GO:0016020|GO:0005773|GO:0006810|GO:0005215	NULL	tonoplast intrinsic protein	IPR000425|IPR023271|IPR022357	Major intrinsic protein|Aquaporin-like|Major intrinsic protein, conserved site	GO:0005215|GO:0006810|GO:0016020	NULL	NULL
Dr16282	GO:0006412|GO:0003723|GO:0005840|GO:0005739|GO:0048229|GO:0003735|GO:0042254	NULL	50s ribosomal protein l21	IPR016024|IPR001787|IPR018258	Armadillo-type fold|Ribosomal protein L21|Ribosomal protein L21, conserved site	GO:0005488|GO:0003723|GO:0003735|GO:0005622|GO:0005840|GO:0006412	NULL	NULL
Dr16283	NULL	NULL	NULL	IPR000608|IPR016135	Ubiquitin-conjugating enzyme, E2|Ubiquitin-conjugating enzyme/RWD-like	GO:0016881	NULL	NULL
Dr16288	NULL	NULL	NULL	IPR014878|IPR011038	Domain of unknown function DUF1794|Calycin-like	NULL	NULL	NULL
Dr16291	NULL	NULL	NULL	IPR012438	Protein of unknown function DUF1639	NULL	NULL	NULL
Dr16292	GO:0008270|GO:0004550|GO:0006241|GO:0005743|GO:0009507|GO:0050897|GO:0006165|GO:0006183|GO:0006228|GO:0009579|GO:0005524|GO:0006979|GO:0006144|GO:0006206	EC:2.7.4.6	nucleoside diphosphate kinase 3	IPR001564|IPR023005	Nucleoside diphosphate kinase|Nucleoside diphosphate kinase, active site	GO:0004550|GO:0005524|GO:0006165|GO:0006183|GO:0006228|GO:0006241	EC:2.7.4.6	KEGG: 00230+2.7.4.6|KEGG: 00240+2.7.4.6|MetaCyc: PWY-6545|MetaCyc: PWY-7176|MetaCyc: PWY-7184|MetaCyc: PWY-7187|MetaCyc: PWY-7197|MetaCyc: PWY-7198|MetaCyc: PWY-7205|MetaCyc: PWY-7210|MetaCyc: PWY-7220|MetaCyc: PWY-7221|MetaCyc: PWY-7222|MetaCyc: PWY-7224|MetaCyc: PWY-7226|MetaCyc: PWY-7227
Dr16307	NULL	NULL	NULL	NULL	NULL	NULL	NULL	NULL
Dr16313	NULL	NULL	NULL	IPR004088|IPR004087	K Homology domain, type 1|K Homology domain	GO:0003723	NULL	NULL
Dr16330	GO:0043234|GO:0051258|GO:0006184|GO:0003924|GO:0009507|GO:0005773|GO:0005525	NULL	uncharacterized protein	IPR011719|IPR018316	Conserved hypothetical protein CHP02058|Tubulin/FtsZ, 2-layer sandwich domain	GO:0003924|GO:0005525|GO:0006184|GO:0043234|GO:0051258	NULL	NULL
Dr16213	NULL	NULL	NULL	IPR001623|IPR002939|IPR008971|IPR018253	DnaJ domain|Chaperone DnaJ, C-terminal|HSP40/DnaJ peptide-binding|DnaJ domain, conserved site	GO:0006457|GO:0051082	NULL	NULL
Dr16242	NULL	NULL	NULL	IPR026059	Rab3-GAP regulatory subunit	GO:0043087	NULL	NULL
Dr16249	NULL	NULL	NULL	IPR019378|IPR024709	GDP-fucose protein O-fucosyltransferase|O-fucosyltransferase, plant	NULL	EC:2.4.1.221	KEGG: 00514+2.4.1.221|UniPathway: UPA00378
Dr16252	GO:0005829|GO:0005507|GO:0005618|GO:0004069|GO:0006103|GO:0005777|GO:0009536|GO:0080130|GO:0006099|GO:0006536|GO:0010150|GO:0030170|GO:0006531|GO:0005886|GO:0006522|GO:0000162|GO:0006107|GO:0006525|GO:0006534|GO:0006560|GO:0006571|GO:0009094|GO:0009821|GO:0015976	EC:2.6.1.1	aspartate aminotransferase	IPR000796|IPR004839|IPR015424|IPR015421|IPR004838	Aspartate/other aminotransferase|Aminotransferase, class I/classII|Pyridoxal phosphate-dependent transferase|Pyridoxal phosphate-dependent transferase, major region, subdomain 1|Aminotransferases, class-I, pyridoxal-phosphate-binding site	GO:0006520|GO:0008483|GO:0009058|GO:0030170|GO:0003824	EC:2.6.1.1	KEGG: 00250+2.6.1.1|KEGG: 00270+2.6.1.1|KEGG: 00330+2.6.1.1|KEGG: 00350+2.6.1.1|KEGG: 00360+2.6.1.1|KEGG: 00400+2.6.1.1|KEGG: 00401+2.6.1.1|KEGG: 00710+2.6.1.1|KEGG: 00950+2.6.1.1|KEGG: 00960+2.6.1.1|MetaCyc: PWY-5913|MetaCyc: PWY-6318|MetaCyc: PWY-6638|MetaCyc: PWY-6642|MetaCyc: PWY-6643|MetaCyc: PWY-7115|MetaCyc: PWY-7117|Reactome: REACT_13
Dr16255	GO:0009536	NULL	esterase lipase domain-containing protein	NULL	NULL	NULL	NULL	NULL
Dr16259	GO:0044763|GO:0004674|GO:0000166|GO:0016310|GO:0005737|GO:0009069	EC:2.7.11.0	cyclin-dependent kinase f-1	IPR000719|IPR011009|IPR002290|IPR017441|IPR008271	Protein kinase domain|Protein kinase-like domain|Serine/threonine- / dual specificity protein kinase, catalytic domain|Protein kinase, ATP binding site|Serine/threonine-protein kinase, active site	GO:0004672|GO:0005524|GO:0006468|GO:0016772|GO:0004674	NULL	NULL
Dr03905	GO:0009536|GO:0016020	NULL	uncharacterized protein	NULL	NULL	NULL	NULL	NULL
Dr03902	NULL	NULL	NULL	IPR001025|IPR008395|IPR014002	Bromo adjacent homology (BAH) domain|Agenet-like domain|Tudor-like, plant	GO:0003677	NULL	NULL
Dr03909	GO:0003677|GO:0009536|GO:0005739	NULL	dna mismatch repair protein msh6-1	IPR015536|IPR000432|IPR007695|IPR007860|IPR007861|IPR007696|IPR027417|IPR016151|IPR002999|IPR017261	DNA mismatch repair protein MutS-homologue MSH6|DNA mismatch repair protein MutS, C-terminal|DNA mismatch repair protein MutS-like, N-terminal|DNA mismatch repair protein MutS, connector domain|DNA mismatch repair protein MutS, clamp|DNA mismatch repair protein MutS, core|P-loop containing nucleoside triphosphate hydrolase|DNA mismatch repair protein MutS, N-terminal|Tudor domain|DNA mismatch rep…	GO:0006298|GO:0005524|GO:0030983	NULL	NULL
Dr03910	GO:0015171|GO:0006865|GO:0016021	NULL	lysine histidine transporter	IPR013057	Amino acid transporter, transmembrane	NULL	NULL	NULL
Dr03925	GO:0071704|GO:0006796|GO:0016301|GO:0044238	NULL	fyve finger-containing phosphoinositide	IPR002423|IPR002498|IPR027409|IPR011011|IPR013083|IPR027484|IPR027483|IPR016034	Chaperonin Cpn60/TCP-1|Phosphatidylinositol-4-phosphate 5-kinase, core|GroEL-like apical domain|Zinc finger, FYVE/PHD-type|Zinc finger, RING/FYVE/PHD-type|Phosphatidylinositol-4-phosphate 5-kinase, N-terminal domain|Phosphatidylinositol-4-phosphate 5-kinase, C-terminal|Phosphatidylinositol-4-phosphate 5-kinase, core, subgroup	GO:0005524|GO:0044267|GO:0016307|GO:0046488	NULL	NULL
Dr03927	GO:0000786|GO:0006355|GO:0003677|GO:0006334|GO:0005634	NULL	high mobility group protein	IPR005818|IPR017956|IPR011991|IPR020478|IPR000116	Linker histone H1/H5, domain H15|AT hook, DNA-binding motif|AT hook-like|High mobility group, HMG-I/HMG-Y|Winged helix-turn-helix DNA-binding domain	GO:0000786|GO:0003677|GO:0005634|GO:0006334|GO:0000785|GO:0006355	NULL	NULL
Dr03932	GO:0004418|GO:0042742|GO:0018160|GO:0015995|GO:0009941|GO:0006782|GO:0009570|GO:0048046	EC:2.5.1.61	hydroxymethylbilane synthase	IPR000860|IPR022417|IPR022418|IPR022419	Tetrapyrrole biosynthesis, hydroxymethylbilane synthase|Porphobilinogen deaminase, N-terminal|Porphobilinogen deaminase, C-terminal|Porphobilinogen deaminase, dipyrromethane cofactor binding site	GO:0004418|GO:0033014|GO:0018160	EC:2.5.1.61	KEGG: 00860+2.5.1.61|MetaCyc: PWY-5188|MetaCyc: PWY-5189|UniPathway: UPA00251
Dr03935	GO:0016667|GO:0009987|GO:0044434|GO:0044710	NULL	thioredoxin-like 1- chloroplastic-like	IPR005746|IPR013766|IPR012336	Thioredoxin|Thioredoxin domain|Thioredoxin-like fold	GO:0006662|GO:0015035|GO:0045454	NULL	NULL
Dr03931	GO:0005525|GO:0005622|GO:0007264	NULL	adp-ribosylation factor-like protein	IPR006689|IPR027417|IPR003579|IPR024156|IPR006687|IPR005225	Small GTPase superfamily, ARF/SAR type|P-loop containing nucleoside triphosphate hydrolase|Small GTPase superfamily, Rab type|Small GTPase superfamily, ARF type|Small GTPase superfamily, SAR1-type|Small GTP-binding protein domain	GO:0005525|GO:0007264|GO:0015031|GO:0005622|GO:0006886	NULL	NULL
Dr03941	NULL	NULL	NULL	IPR006786	Pinin/SDK/MemA protein	NULL	NULL	NULL
Dr03951	NULL	NULL	NULL	NULL	NULL	NULL	NULL	NULL
Dr25052	GO:0030942|GO:0006614|GO:0005786|GO:0008312	NULL	signal recognition particle subunit srp14	IPR003210|IPR009018	Signal recognition particle, SRP14 subunit|Signal recognition particle, SRP9/SRP14 subunit	GO:0005786|GO:0006614|GO:0008312|GO:0030942|GO:0048500	NULL	Reactome: REACT_15380
Dr16335	GO:0044238|GO:0044763|GO:0034645|GO:0016023|GO:0044425|GO:0016757	NULL	gpi mannosyltransferase 1	IPR007704	Mannosyltransferase, DXD	GO:0005789|GO:0006506|GO:0016021|GO:0016758	EC:2.4.1.-	KEGG: 00051+2.4.1.-|KEGG: 00512+2.4.1.-|KEGG: 00513+2.4.1.-|KEGG: 00514+2.4.1.-|KEGG: 00522+2.4.1.-|KEGG: 00533+2.4.1.-|KEGG: 00540+2.4.1.-|KEGG: 00550+2.4.1.-|KEGG: 00561+2.4.1.-|KEGG: 00563+2.4.1.-|KEGG: 00600+2.4.1.-|KEGG: 00601+2.4.1.-|KEGG: 00603+2.4.1.-|KEGG: 00604+2.4.1.-|KEGG: 00906+2.4.1.-|KEGG: 00908+2.4.1.-|KEGG: 00941+2.4.1.-|KEGG: 00942+2.4.1.-|KEGG: 00944+2.4.1.-|KEGG: 00945+2.4.1.-…
Dr16340	GO:0009941|GO:0016020|GO:0005739	NULL	uncharacterized protein	IPR001727	Uncharacterised protein family UPF0016	GO:0016020	NULL	NULL
Dr16347	GO:0008967|GO:0005739|GO:0009507|GO:0046487	EC:3.1.3.18	uncharacterized hydrolase yor131c-like	IPR023214|IPR006439	HAD-like domain|HAD hydrolase, subfamily IA	GO:0008152|GO:0016787	NULL	NULL
Dr16353	GO:0072488|GO:0003723|GO:0048544|GO:0000178|GO:0016021|GO:0008519	NULL	exosome complex component csl4	IPR019495|IPR025721|IPR012340	Exosome complex component CSL4|Exosome complex component, N-terminal domain|Nucleic acid-binding, OB-fold	GO:0000178|GO:0003723	NULL	NULL
Dr16358	NULL	NULL	NULL	NULL	NULL	NULL	NULL	NULL
Dr16360	GO:0005515|GO:0003743|GO:0005634|GO:0009615|GO:0005840|GO:0006446	NULL	eukaryotic initiation factor 4e	IPR001040|IPR023398|IPR019770	Translation Initiation factor eIF- 4e|Translation Initiation factor eIF- 4e-like domain|Eukaryotic translation initiation factor 4E (eIF-4E), conserved site	GO:0003723|GO:0003743|GO:0005737|GO:0006413	NULL	NULL
Dr16364	GO:0005840|GO:0003735|GO:0009507|GO:0016020|GO:0006412|GO:0042254	NULL	50s ribosomal protein chloroplast	IPR001383	Ribosomal protein L28	GO:0003735|GO:0005622|GO:0005840|GO:0006412	NULL	NULL
Dr16367	GO:0009536	NULL	pppde peptidase domain-containing protein 2-like	IPR008580	PPPDE putative peptidase domain	NULL	EC:3.4.-.-	KEGG: 00310+3.4.-.-|KEGG: 00550+3.4.-.-|KEGG: 00780+3.4.-.-
Dr16368	GO:0048856|GO:0016023|GO:0007275|GO:0016740	NULL	transcriptional corepressor leunig	IPR001680|IPR013720|IPR017986|IPR015943|IPR006594|IPR019775	WD40 repeat|LisH dimerisation motif, subgroup|WD40-repeat-containing domain|WD40/YVTN repeat-like-containing domain|LisH dimerisation motif|WD40 repeat, conserved site	GO:0005515	NULL	NULL
Dr16369	GO:0016021|GO:0005778	NULL	peroxisomal membrane protein pmp22	IPR007248	Mpv17/PMP22	GO:0016021	NULL	NULL
Dr16371	GO:0009536	NULL	protein	NULL	NULL	NULL	NULL	NULL
Dr16375	GO:0016023	NULL	protein	NULL	NULL	NULL	NULL	NULL
Dr16376	NULL	NULL	NULL	NULL	NULL	NULL	NULL	NULL
Dr16377	GO:0005886|GO:0016036|GO:0016021|GO:0006817	NULL	pho1-like protein	IPR004331|IPR004342	SPX, N-terminal|EXS, C-terminal	GO:0016021	NULL	NULL
Dr16395	GO:0044444|GO:0043229	NULL	kinesin like protein	IPR027640|IPR001752|IPR027417	Kinesin-like protein|Kinesin, motor domain|P-loop containing nucleoside triphosphate hydrolase	GO:0003777|GO:0005871|GO:0007018|GO:0005524|GO:0008017	NULL	NULL
Dr16397	NULL	NULL	NULL	NULL	NULL	NULL	NULL	NULL
Dr16402	GO:0009536|GO:0016740	NULL	uncharacterized protein	IPR018865	Serine-threonine protein kinase 19	NULL	NULL	NULL
[truncated: 3,811 more rows]
