# Supplementary material for: Genome sequencing of the staple food crop white Guinea yam enables the development of a molecular marker for sex determination
Source: BMC Biol. 2017 Sep 19;15:86. doi: 10.1186/s12915-017-0419-x (PMC5604175; doi:10.1186/s12915-017-0419-x)
Supplement: Supplementary file 7 — Functional annotation of D. rotundata genes conserved between D. rotundata and at least one other angiosperm (A. thaliana, B. distachyon, O. sativa, E. guineensis, P. dactylifera, and M. acuminata). (XLSX 356 kb) [file 12915_2017_419_MOESM7_ESM.xlsx]

## Sheet: Supplemental dataset S5
Affitional file 7: Supplemental dataset S5. Functional annotation of D. rotundata genes conserved between D. rotundata and at least one other angiosperm (A. thaliana, B. distachyon, O. sativa, E. guineensis, P. dactylifera and M.acuminata).
Gene_ID	Blast2GO_GO_term	Blast2GO_EC_Number	Blast2GO_GO_Description	Interproscan_IPR	Interproscan_IPR_Description	Interproscan_GO_term	Interproscan_EC_Number	Interproscan_Pathways
Dr14361	GO:0016772	NULL	meiotically up-regulated gene 71	IPR006175|IPR002761|IPR013813|IPR014729	YjgF/Yer057p/UK114 family|DUF71 domain|Endoribonuclease L-PSP/chorismate mutase-like|Rossmann-like alpha/beta/alpha sandwich fold	NULL	NULL	MetaCyc: PWY-6482|UniPathway: UPA00559
Dr14395	GO:0044249|GO:0044238|GO:0044260|GO:0044424	NULL	protein	IPR002728|IPR016435	Diphthamide synthesis, DPH1/DPH2|Diphthamide synthesis, eukaryotic DPH1/archaeal DPH2	GO:0005737|GO:0017183	NULL	UniPathway: UPA00559
Dr14532	NULL	NULL	NULL	IPR002885|IPR011990	Pentatricopeptide repeat|Tetratricopeptide-like helical	GO:0005515	NULL	NULL
Dr14541	GO:0046509|GO:0010027|GO:0019375|GO:0009706|GO:0030246|GO:0030259|GO:0009790|GO:0046486	EC:2.4.1.46	mgdg synthase type a	IPR009695	Diacylglycerol glucosyltransferase, N-terminal	GO:0009247|GO:0016758	NULL	NULL
Dr14569	GO:0016020	NULL	vacuolar amino acid transporter 1-like	IPR013057	Amino acid transporter, transmembrane	NULL	NULL	NULL
Dr14611	GO:0008152|GO:0005739|GO:0008409|GO:0003677	NULL	5 -3 exonuclease-like protein	IPR020045|IPR020046|IPR008918|IPR002421	5'-3' exonuclease, C-terminal domain|5'-3' exonuclease, alpha-helical arch, N-terminal|Helix-hairpin-helix motif, class 2|5'-3' exonuclease, N-terminal	GO:0003677|GO:0003824|GO:0008409	NULL	NULL
Dr14604	GO:0016020|GO:0005739	NULL	uncharacterized protein	IPR008470	Uncharacterised protein family Ycf33	NULL	NULL	NULL
Dr14658	GO:0043167|GO:0005739	NULL	gtp-binding protein	IPR016496|IPR006073|IPR027417	GTPase HflX|GTP binding domain|P-loop containing nucleoside triphosphate hydrolase	GO:0005525	NULL	NULL
Dr14660	GO:0051920|GO:0004601|GO:0055114|GO:0009570|GO:0006804|GO:0006979	EC:1.11.1.15|EC:1.11.1.7	upf0308 protein chloroplastic-like	IPR012336	Thioredoxin-like fold	NULL	NULL	NULL
Dr14684	GO:0016772|GO:0043231|GO:0044444	NULL	brassinosteroid insensitive 1-associated receptor kinase 1	IPR001245|IPR011009|IPR013320|IPR000719|IPR008266	Serine-threonine/tyrosine-protein kinase catalytic domain|Protein kinase-like domain|Concanavalin A-like lectin/glucanase, subgroup|Protein kinase domain|Tyrosine-protein kinase, active site	GO:0004672|GO:0006468|GO:0016772|GO:0005524|GO:0004713	NULL	NULL
Dr14756	NULL	NULL	NULL	IPR016159	Cullin repeat-like-containing domain	NULL	NULL	NULL
Dr14730	GO:0015116|GO:0016020|GO:0008272	NULL	sulfate bicarbonate oxalate exchanger and transporter sat-1	IPR011547|IPR002645|IPR018045	Sulphate transporter|STAS domain|Sulphate anion transporter, conserved site	GO:0008272|GO:0015116|GO:0016021|GO:0008271	NULL	NULL
Dr02907	GO:0043231|GO:0044444	NULL	tsl-kinase interacting protein 1	IPR009057|IPR001005|IPR017884	Homeodomain-like|SANT/Myb domain|SANT domain	GO:0003677|GO:0003682	NULL	NULL
Dr02939	GO:0005525|GO:0009737|GO:0051020|GO:0016020|GO:0010228|GO:0010427	NULL	gpcr-type g protein 1	IPR015672|IPR025969|IPR022535	GPCR 89-related|Abscisic acid G-protein coupled receptor-like domain|Golgi pH regulator, conserved domain	NULL	NULL	NULL
Dr02960	GO:0016020|GO:0016023|GO:0009941	NULL	membrane protein	IPR007300	CidB/LrgB family	NULL	NULL	NULL
Dr02966	NULL	NULL	NULL	IPR024593|IPR001623	Domain of unknown function DUF3444|DnaJ domain	NULL	NULL	NULL
Dr03023	GO:0016020|GO:0016023|GO:0016740	NULL	udp-n-acetylglucosamine transferase subunit alg14 homolog	IPR013969	Oligosaccharide biosynthesis protein Alg14-like	NULL	NULL	NULL
Dr03029	GO:0016020	NULL	gpi transamidase subunit pig-u	IPR009600	GPI transamidase subunit PIG-U	GO:0005789|GO:0006506|GO:0016021	NULL	UniPathway: UPA00196
Dr03051	GO:1901137|GO:0034645|GO:0006464|GO:0016757|GO:0016020	NULL	alpha- -mannosyltransferase	IPR005599	GPI mannosyltransferase	GO:0016757	NULL	NULL
Dr03071	GO:0044260|GO:0090304|GO:0016740|GO:0010467	NULL	dna-directed rna polymerase ii subunit rpb4	IPR005574|IPR010997	RNA polymerase II, Rpb4|HRDC-like	GO:0003899|GO:0006351|GO:0000166|GO:0003824|GO:0044237	NULL	NULL
Dr03160	GO:0008610|GO:0044255|GO:0004672|GO:0043167|GO:0050896|GO:0044249	NULL	malonyl- decarboxylase	IPR007956|IPR013137	Malonyl-CoA decarboxylase|Zinc finger, TFIIB-type	GO:0006633|GO:0050080	EC:4.1.1.9	KEGG: 00410+4.1.1.9|KEGG: 00640+4.1.1.9|MetaCyc: PWY-5810|UniPathway: UPA00340|Reactome: REACT_1788
Dr03178	NULL	NULL	NULL	IPR006904	Protein of unknown function DUF716, TMEM45	NULL	NULL	NULL
Dr03210	GO:0009536	NULL	pentatricopeptide repeat-containing protein	IPR002885|IPR011990	Pentatricopeptide repeat|Tetratricopeptide-like helical	GO:0005515	NULL	NULL
Dr03179	GO:0005739	NULL	uncharacterized protein	NULL	NULL	NULL	NULL	NULL
Dr03186	GO:0016023	NULL	uncharacterized protein	NULL	NULL	NULL	NULL	NULL
Dr03262	NULL	NULL	NULL	IPR002885|IPR011990	Pentatricopeptide repeat|Tetratricopeptide-like helical	GO:0005515	NULL	NULL
Dr03344	GO:0009536	NULL	pentatricopeptide repeat-containing protein	IPR002885|IPR011990	Pentatricopeptide repeat|Tetratricopeptide-like helical	GO:0005515	NULL	NULL
Dr03395	NULL	NULL	NULL	IPR000626|IPR019956|IPR019955	Ubiquitin domain|Ubiquitin|Ubiquitin supergroup	GO:0005515	NULL	NULL
Dr03424	GO:0005739	NULL	escrt-ii complex subunit vps22	IPR007286|IPR011991	EAP30|Winged helix-turn-helix DNA-binding domain	NULL	NULL	NULL
Dr03441	GO:0005739|GO:0009536	NULL	armadillo beta-catenin-like repeat-containing protein	IPR016024|IPR011989	Armadillo-type fold|Armadillo-like helical	GO:0005488	NULL	NULL
Dr03456	NULL	NULL	NULL	IPR012864|IPR011051|IPR014710	Cysteamine dioxygenase|RmlC-like cupin domain|RmlC-like jelly roll fold	GO:0047800|GO:0055114	EC:1.13.11.19	KEGG: 00430+1.13.11.19
Dr03386	GO:0004069|GO:0006103|GO:0009409|GO:0009941|GO:0080130|GO:0006536|GO:0009570|GO:0005759|GO:0046686|GO:0030170|GO:0006531|GO:0010319|GO:0048046|GO:0000162|GO:0006107|GO:0006522|GO:0006525|GO:0006534|GO:0006560|GO:0006571|GO:0009094|GO:0009821|GO:0015976	EC:2.6.1.1	aspartate aminotransferase	IPR000796|IPR004839|IPR015424|IPR015421|IPR015422|IPR004838	Aspartate/other aminotransferase|Aminotransferase, class I/classII|Pyridoxal phosphate-dependent transferase|Pyridoxal phosphate-dependent transferase, major region, subdomain 1|Pyridoxal phosphate-dependent transferase, major region, subdomain 2|Aminotransferases, class-I, pyridoxal-phosphate-binding site	GO:0006520|GO:0008483|GO:0009058|GO:0030170|GO:0003824	EC:2.6.1.1	KEGG: 00250+2.6.1.1|KEGG: 00270+2.6.1.1|KEGG: 00330+2.6.1.1|KEGG: 00350+2.6.1.1|KEGG: 00360+2.6.1.1|KEGG: 00400+2.6.1.1|KEGG: 00401+2.6.1.1|KEGG: 00710+2.6.1.1|KEGG: 00950+2.6.1.1|KEGG: 00960+2.6.1.1|MetaCyc: PWY-5913|MetaCyc: PWY-6318|MetaCyc: PWY-6638|MetaCyc: PWY-6642|MetaCyc: PWY-6643|MetaCyc: PWY-7115|MetaCyc: PWY-7117|Reactome: REACT_13
Dr03388	GO:0005618|GO:0005739|GO:0006435|GO:0004829|GO:0005524|GO:0009507|GO:0005886|GO:0006544|GO:0006563|GO:0006566	EC:6.1.1.3	threonyl-trna synthetase	IPR002314|IPR004095|IPR004154|IPR012947|IPR018163|IPR012676|IPR012675|IPR002320|IPR006195	Aminoacyl-tRNA synthetase, class II (G/ H/ P/ S), conserved domain|TGS|Anticodon-binding|Threonyl/alanyl tRNA synthetase, SAD|Threonine-tRNA ligase, class IIa|Threonyl/alanyl tRNA synthetase, class II-like, putative editing domain|TGS-like|Beta-grasp domain|Aminoacyl-tRNA synthetase, class II	GO:0000166|GO:0004812|GO:0005524|GO:0006418|GO:0016876|GO:0043039|GO:0004829|GO:0005737|GO:0006435	EC:6.1.1.3	Reactome: REACT_71|KEGG: 00970+6.1.1.3
Dr03492	GO:0044765|GO:0016020|GO:0009536	NULL	k+ efflux antiporter 3	IPR006153|IPR003148|IPR016040	Cation/H+ exchanger|Regulator of K+ conductance, N-terminal|NAD(P)-binding domain	GO:0006812|GO:0015299|GO:0016021|GO:0055085|GO:0006813	NULL	NULL
Dr03551	GO:0009536	NULL	pentatricopeptide repeat-containing protein	IPR002885	Pentatricopeptide repeat	NULL	NULL	NULL
Dr03544	NULL	NULL	NULL	NULL	NULL	NULL	NULL	NULL
Dr03677	NULL	NULL	NULL	IPR002885	Pentatricopeptide repeat	NULL	NULL	NULL
Dr03723	GO:0016874	NULL	u-box domain-containing protein	IPR003613|IPR016024|IPR011989|IPR013083	U box domain|Armadillo-type fold|Armadillo-like helical|Zinc finger, RING/FYVE/PHD-type	GO:0000151|GO:0004842|GO:0016567|GO:0005488	NULL	NULL
Dr03570	GO:0009536	NULL	protein	IPR018962	Domain of unknown function DUF1995	NULL	NULL	NULL
Dr03567	GO:0016020	NULL	organic cation transporter	IPR005828|IPR016196|IPR020846	General substrate transporter|Major facilitator superfamily domain, general substrate transporter|Major facilitator superfamily domain	GO:0016021|GO:0022857|GO:0055085	NULL	NULL
Dr14954	GO:0032259|GO:0005739|GO:0008168	EC:2.1.1.0	s-adenosylmethionine-dependent methyltransferase domain-containing protein	IPR013216	Methyltransferase type 11	GO:0008152|GO:0008168	NULL	NULL
Dr15037	GO:0009536	NULL	pentatricopeptide repeat-containing protein	IPR002885|IPR011990|IPR002625	Pentatricopeptide repeat|Tetratricopeptide-like helical|Smr protein/MutS2 C-terminal	GO:0005515	NULL	NULL
Dr15086	GO:0043231	NULL	origin recognition complex subunit	IPR020795	Origin recognition complex, subunit 3	GO:0003677|GO:0005664|GO:0006260	NULL	NULL
Dr15093	GO:0004828|GO:0005739|GO:0006434|GO:0048481|GO:0005524|GO:0009507|GO:0006544|GO:0006563|GO:0006566	EC:6.1.1.11	seryl-trna synthetase	IPR002317|IPR002314|IPR015866|IPR010978|IPR006195	Serine-tRNA ligase, type1|Aminoacyl-tRNA synthetase, class II (G/ H/ P/ S), conserved domain|Serine-tRNA synthetase, type1, N-terminal|tRNA-binding arm|Aminoacyl-tRNA synthetase, class II	GO:0000166|GO:0004828|GO:0005524|GO:0005737|GO:0006434|GO:0004812|GO:0006418	EC:6.1.1.11	KEGG: 00970+6.1.1.11|MetaCyc: PWY-6281|Reactome: REACT_71|UniPathway: UPA00906|Reactome: REACT_71|KEGG: 00970+6.1.1.11|MetaCyc: PWY-6281|UniPathway: UPA00906
Dr15190	GO:0006281|GO:0003676|GO:0007049|GO:0043167|GO:0000166|GO:0016787	NULL	rad54-like protein	IPR000330|IPR001650|IPR027417|IPR014001	SNF2-related|Helicase, C-terminal|P-loop containing nucleoside triphosphate hydrolase|Helicase, superfamily 1/2, ATP-binding domain	GO:0003677|GO:0005524|GO:0003676|GO:0004386	NULL	NULL
Dr15231	NULL	NULL	NULL	NULL	NULL	NULL	NULL	NULL
Dr15345	NULL	NULL	NULL	NULL	NULL	NULL	NULL	NULL
Dr15409	NULL	NULL	NULL	IPR002885|IPR011990	Pentatricopeptide repeat|Tetratricopeptide-like helical	GO:0005515	NULL	NULL
Dr15431	GO:0005739	NULL	pentatricopeptide repeat-containing protein	IPR002885|IPR011990	Pentatricopeptide repeat|Tetratricopeptide-like helical	GO:0005515	NULL	NULL
Dr15456	GO:0009658|GO:0040007|GO:0009507|GO:0009416|GO:0009451	NULL	pentatricopeptide repeat-containing protein	IPR002885|IPR011990	Pentatricopeptide repeat|Tetratricopeptide-like helical	GO:0005515	NULL	NULL
Dr15482	NULL	NULL	NULL	IPR009057|IPR017877	Homeodomain-like|Myb-like domain	GO:0003677	NULL	NULL
Dr15484	GO:0043231|GO:0003676|GO:0008026|GO:0006139|GO:0000166	NULL	regulator of telomere elongation helicase 1	IPR010614|IPR006555|IPR027417|IPR014001|IPR006554|IPR014013	DEAD2|ATP-dependent helicase, C-terminal|P-loop containing nucleoside triphosphate hydrolase|Helicase, superfamily 1/2, ATP-binding domain|Helicase-like, DEXD box c2 type|Helicase, superfamily 1/2, ATP-binding domain, DinG/Rad3-type	GO:0003677|GO:0004003|GO:0005524|GO:0003676|GO:0006139|GO:0008026|GO:0016818|GO:0016817	NULL	NULL
Dr15492	GO:0003676|GO:0009536	NULL	pentatricopeptide repeat-containing protein	IPR002885|IPR011990	Pentatricopeptide repeat|Tetratricopeptide-like helical	GO:0005515	NULL	NULL
Dr15499	NULL	NULL	NULL	IPR005043|IPR001494|IPR013598|IPR013713|IPR016024|IPR011989	CAS/CSE, C-terminal|Importin-beta, N-terminal domain|Exportin-1/Importin-beta-like|Exportin/Importin, Cse1-like|Armadillo-type fold|Armadillo-like helical	GO:0005515|GO:0006886|GO:0008536|GO:0005488	NULL	NULL
Dr15570	GO:0005739|GO:0016363	NULL	protein	IPR007109|IPR004154	Brix domain|Anticodon-binding	NULL	NULL	NULL
Dr03806	GO:0016020	NULL	lmbr1 domain-containing protein 2 homolog a-like	IPR006876	LMBR1-like membrane protein	NULL	NULL	NULL
Dr03807	GO:0017111|GO:0006260|GO:0003677|GO:0005524|GO:0006974	EC:3.6.1.15	dna replication licensing factor mcm9-like	IPR001208|IPR012340|IPR027417|IPR003593	Mini-chromosome maintenance, DNA-dependent ATPase|Nucleic acid-binding, OB-fold|P-loop containing nucleoside triphosphate hydrolase|AAA+ ATPase domain	GO:0003677|GO:0005524|GO:0006260|GO:0000166|GO:0017111	NULL	NULL
Dr03877	GO:0004672|GO:0006468|GO:0005524	NULL	protein kinase chloroplast	IPR000719|IPR011009|IPR013320|IPR017441	Protein kinase domain|Protein kinase-like domain|Concanavalin A-like lectin/glucanase, subgroup|Protein kinase, ATP binding site	GO:0004672|GO:0005524|GO:0006468|GO:0016772	NULL	NULL
Dr15606	GO:0019253|GO:0046872|GO:0042132|GO:0004331|GO:0009409|GO:0009773|GO:0010319|GO:0009570|GO:0032440|GO:0048046|GO:0006000|GO:0006013|GO:0006094|GO:0006096|GO:0006098|GO:0015976	EC:3.1.3.11|EC:3.1.3.46|EC:1.3.1.74	fructose- -bisphosphatase	IPR000146|IPR028343|IPR020548	Fructose-1,6-bisphosphatase class 1/Sedoheputulose-1,7-bisphosphatase|Fructose-1,6-bisphosphatase|Fructose-1,6-bisphosphatase, active site	GO:0005975|GO:0042132|GO:0042578	EC:3.1.3.11	KEGG: 00010+3.1.3.11|KEGG: 00030+3.1.3.11|KEGG: 00051+3.1.3.11|KEGG: 00680+3.1.3.11|KEGG: 00710+3.1.3.11|MetaCyc: PWY-5484|Reactome: REACT_474|UniPathway: UPA00138|KEGG: 00010+3.1.3.11|KEGG: 00030+3.1.3.11|KEGG: 00051+3.1.3.11|KEGG: 00680+3.1.3.11|KEGG: 00710+3.1.3.11|MetaCyc: PWY-5484|UniPathway: UPA00138|KEGG: 00010+3.1.3.11|KEGG: 00030+3.1.3.11|KEGG: 00051+3.1.3.11|KEGG: 00680+3.1.3.11|KEGG: 0…
Dr15627	GO:0009535|GO:0005506	NULL	protein	IPR024935|IPR004039|IPR024934|IPR018527	Rubredoxin domain|Rubredoxin-type fold|Rubredoxin-like domain|Rubredoxin, iron-binding site	GO:0005506|GO:0046872	NULL	NULL
Dr15652	GO:0005886|GO:0006468|GO:0005524|GO:0004674|GO:0005739|GO:0009069	EC:2.7.11.0	receptor-like serine threonine-protein kinase ale2-like	IPR000719|IPR011009|IPR013320|IPR017441|IPR008271	Protein kinase domain|Protein kinase-like domain|Concanavalin A-like lectin/glucanase, subgroup|Protein kinase, ATP binding site|Serine/threonine-protein kinase, active site	GO:0004672|GO:0005524|GO:0006468|GO:0016772|GO:0004674	NULL	NULL
Dr15695	GO:0044765|GO:0044763|GO:0016020	NULL	protein	IPR026957|IPR003864	Transmembrane protein 63|Domain of unknown function DUF221	GO:0016020	NULL	NULL
Dr15748	NULL	NULL	NULL	IPR002562|IPR002782|IPR012337	3'-5' exonuclease domain|Mut7-C RNAse domain|Ribonuclease H-like domain	GO:0003676|GO:0006139|GO:0008408	NULL	NULL
Dr15760	GO:0005739	NULL	upf0551 protein c8orf38 mitochondrial-like	IPR002060|IPR008949	Squalene/phytoene synthase|Terpenoid synthase	GO:0009058|GO:0016740	NULL	NULL
Dr15881	GO:0044249|GO:1901137|GO:0044763|GO:0044710|GO:0005975|GO:0006807|GO:0008375	NULL	udp-n-acetylglucosamine--n-acetylmuramyl- pyrophosphoryl-undecaprenol n-acetylglucosamine transferase	IPR006009|IPR004276|IPR007235	N-acetylglucosaminyltransferase, MurG|Glycosyl transferase, family 28|Glycosyl transferase, family 28, C-terminal	GO:0019277|GO:0050511|GO:0005975|GO:0016758|GO:0030259|GO:0030246	EC:2.4.1.227	KEGG: 00550+2.4.1.227|MetaCyc: PWY-5265|MetaCyc: PWY-6385|MetaCyc: PWY-6470|MetaCyc: PWY-6471|UniPathway: UPA00219
Dr15883	NULL	NULL	NULL	IPR008545	WEB family	NULL	NULL	NULL
Dr15908	NULL	NULL	NULL	IPR002885|IPR011990	Pentatricopeptide repeat|Tetratricopeptide-like helical	GO:0005515	NULL	NULL
Dr15931	GO:0005524|GO:0017111|GO:0005739	EC:3.6.1.15	atp binding	IPR019591|IPR025669|IPR027417	ATPase-like, ParA/MinD|AAA domain|P-loop containing nucleoside triphosphate hydrolase	NULL	NULL	NULL
Dr15962	GO:0016070|GO:0005739	NULL	trna pseudouridine synthase-like	IPR001406|IPR020097|IPR020103|IPR020094|IPR020095	Pseudouridine synthase I, TruA|Pseudouridine synthase I, TruA, alpha/beta domain|Pseudouridine synthase, catalytic domain|Pseudouridine synthase I, TruA, N-terminal|Pseudouridine synthase I, TruA, C-terminal	GO:0001522|GO:0003723|GO:0009451|GO:0009982	NULL	NULL
Dr15983	GO:0046872|GO:0004222|GO:0006508	EC:3.4.24.0	insulin-degrading enzyme-like	IPR011765|IPR007863|IPR011249|IPR011237|IPR001431	Peptidase M16, N-terminal|Peptidase M16, C-terminal domain|Metalloenzyme, LuxS/M16 peptidase-like|Peptidase M16 domain|Peptidase M16, zinc-binding site	GO:0003824|GO:0046872|GO:0004222|GO:0006508	NULL	NULL
Dr16012	NULL	NULL	NULL	IPR021102	Peptide-N4-(N-acetyl-beta-glucosaminyl)asparagine amidase A	NULL	NULL	NULL
Dr16175	NULL	NULL	NULL	IPR017986|IPR015943|IPR003888	WD40-repeat-containing domain|WD40/YVTN repeat-like-containing domain|FY-rich, N-terminal	GO:0005515|GO:0005634	NULL	NULL
Dr25028	GO:0006457|GO:0000413|GO:0003755	EC:5.2.1.8	peptidyl-prolyl cis-trans isomerase-like 3	IPR002130|IPR020892	Cyclophilin-like peptidyl-prolyl cis-trans isomerase domain|Cyclophilin-type peptidyl-prolyl cis-trans isomerase, conserved site	GO:0003755|GO:0006457	NULL	NULL
Dr16228	GO:0009536	NULL	pentatricopeptide repeat-containing protein	IPR002885|IPR011990	Pentatricopeptide repeat|Tetratricopeptide-like helical	GO:0005515	NULL	NULL
Dr16312	NULL	NULL	NULL	IPR019734|IPR011990|IPR013026	Tetratricopeptide repeat|Tetratricopeptide-like helical|Tetratricopeptide repeat-containing domain	GO:0005515	NULL	NULL
Dr16324	GO:0004746|GO:0009231|GO:0016491|GO:0009507|GO:0055114|GO:0009349	EC:2.5.1.9	riboflavin synthase alpha chain	IPR001783|IPR026017|IPR017938|IPR023366	Lumazine-binding protein|Lumazine-binding domain|Riboflavin synthase-like beta-barrel|ATP synthase subunit alpha-like domain	GO:0004746|GO:0009231|GO:0016491|GO:0055114	EC:2.5.1.9|EC:3.6.3.14	KEGG: 00740+2.5.1.9|MetaCyc: PWY-6167|MetaCyc: PWY-6168|UniPathway: UPA00275|KEGG: 00190+3.6.3.14|KEGG: 00195+3.6.3.14|MetaCyc: PWY-7219
Dr16211	NULL	NULL	NULL	IPR002885|IPR011990	Pentatricopeptide repeat|Tetratricopeptide-like helical	GO:0005515	NULL	NULL
Dr16262	GO:0009987|GO:0046872|GO:0044699|GO:0044444	NULL	peroxisome assembly protein	IPR006845|IPR013083|IPR001841|IPR017907	Pex, N-terminal|Zinc finger, RING/FYVE/PHD-type|Zinc finger, RING-type|Zinc finger, RING-type, conserved site	GO:0005515|GO:0008270	NULL	NULL
Dr03903	GO:0005840|GO:0003735|GO:0006412|GO:0005739|GO:0042254	NULL	50s ribosomal protein l18	IPR005484	Ribosomal protein L18/L5	GO:0003735|GO:0005622|GO:0005840|GO:0006412	NULL	NULL
Dr16355	NULL	NULL	NULL	NULL	NULL	NULL	NULL	NULL
Dr16412	GO:0005739	NULL	pentatricopeptide repeat-containing protein	IPR002885|IPR011990	Pentatricopeptide repeat|Tetratricopeptide-like helical	GO:0005515	NULL	NULL
Dr16348	GO:0005739|GO:0070681|GO:0032543|GO:0050567|GO:0005524|GO:0016740|GO:0009570|GO:0030956|GO:0006536	EC:6.3.5.7	aspartyl-trna glutamyl-trna amidotransferase subunit b	IPR017959|IPR018027|IPR006075|IPR003789|IPR004413|IPR017958	Aspartyl/glutamyl-tRNA(Asn/Gln) amidotransferase, subunit B /E|Asn/Gln amidotransferase|Aspartyl/Glutamyl-tRNA(Gln) amidotransferase, subunit B/E, catalytic|Aspartyl/glutamyl-tRNA amidotransferase subunit B-related|Aspartyl/glutamyl-tRNA(Asn/Gln) amidotransferase, B subunit|Glutamyl-tRNA(Gln) amidotransferase, subunit B, conserved site	GO:0016884|GO:0016874	EC:6.3.5.-	KEGG: 00253+6.3.5.-
Dr16452	GO:0090305|GO:0004518|GO:0009507|GO:0006281	NULL	dna-(apurinic or apyrimidinic site) lyase	IPR004808|IPR005135	AP endonuclease 1|Endonuclease/exonuclease/phosphatase	GO:0004518|GO:0006281	NULL	NULL
Dr16456	GO:0006457|GO:0005528|GO:0031977|GO:0009507|GO:0000413|GO:0016020|GO:0003755	EC:5.2.1.8	protein	IPR023566|IPR001179	Peptidyl-prolyl cis-trans isomerase, FKBP-type|Peptidyl-prolyl cis-trans isomerase, FKBP-type, domain	GO:0006457	NULL	NULL
Dr16470	GO:0005737|GO:0046872|GO:0019509|GO:0010309|GO:0005634|GO:0055114	EC:1.13.11.54	-dihydroxy-3-keto-5-methylthiopentene dioxygenase 4	IPR004313|IPR011051|IPR014710|IPR027496	Acireductone dioxygenase ARD family|RmlC-like cupin domain|RmlC-like jelly roll fold|1,2-dihydroxy-3-keto-5-methylthiopentene dioxygenase, eukaryotes	GO:0010309|GO:0055114|GO:0016491|GO:0019509	EC:1.13.11.54	KEGG: 00270+1.13.11.54|MetaCyc: PWY-6755|MetaCyc: PWY-7270|UniPathway: UPA00904
Dr16511	GO:0016020|GO:0005739|GO:0006810	NULL	mitochondrial substrate carrier family protein e	IPR018108|IPR023395	Mitochondrial substrate/solute carrier|Mitochondrial carrier domain	NULL	NULL	NULL
Dr16507	GO:0005622	NULL	50s ribosomal protein l7	IPR015608|IPR013823|IPR008932|IPR014719|IPR000206	Putative ribosomal protein L7/L12, plants|Ribosomal protein L7/L12, C-terminal|Ribosomal protein L7/L12, oligomerisation|Ribosomal protein L7/L12, C-terminal/adaptor protein ClpS-like|Ribosomal protein L7/L12	GO:0003735|GO:0005622|GO:0005840|GO:0006412	NULL	NULL
Dr16534	GO:0005840|GO:0003735|GO:0006412|GO:0005739|GO:0042254	NULL	ribosomal protein l7 l12 domain-containing protein	IPR015608|IPR013823|IPR014719	Putative ribosomal protein L7/L12, plants|Ribosomal protein L7/L12, C-terminal|Ribosomal protein L7/L12, C-terminal/adaptor protein ClpS-like	GO:0003735|GO:0005622|GO:0005840|GO:0006412	NULL	NULL
Dr16601	GO:0005779|GO:0016559	NULL	protein	IPR008733	Peroxisomal biogenesis factor 11	GO:0005779|GO:0016559	NULL	NULL
Dr16572	NULL	NULL	NULL	IPR006943	Domain of unknown function DUF641, plant	NULL	NULL	NULL
Dr16638	GO:0009536	NULL	fat-free-like protein	NULL	NULL	NULL	NULL	NULL
Dr16660	GO:0005737|GO:0042787|GO:0004842|GO:0005634	EC:6.3.2.19	e3 ubiquitin-protein ligase upl6	IPR000569|IPR000048	HECT|IQ motif, EF-hand binding site	GO:0004842|GO:0005515	EC:6.3.2.-	KEGG: 00300+6.3.2.-|KEGG: 00380+6.3.2.-|UniPathway: UPA00143
Dr16675	NULL	NULL	NULL	NULL	NULL	NULL	NULL	NULL
Dr16690	GO:0005739	NULL	uncharacterized protein	NULL	NULL	NULL	NULL	NULL
Dr04009	GO:0006200|GO:0005524|GO:0016887|GO:0016020	EC:3.6.1.3	abc transporter g family member 23	IPR003439|IPR013525|IPR027417|IPR003593|IPR017871	ABC transporter-like|ABC-2 type transporter|P-loop containing nucleoside triphosphate hydrolase|AAA+ ATPase domain|ABC transporter, conserved site	GO:0005524|GO:0016887|GO:0016020|GO:0000166|GO:0017111	NULL	NULL
Dr16806	GO:0003824	NULL	protein	IPR011257	DNA glycosylase	GO:0003824|GO:0006281	NULL	Reactome: REACT_216
Dr25179	GO:0005778|GO:0016021|GO:0007031	NULL	peroxisomal membrane protein 11a	IPR008733	Peroxisomal biogenesis factor 11	GO:0005779|GO:0016559	NULL	NULL
Dr16913	GO:0005739	NULL	pentatricopeptide repeat-containing protein	IPR002885|IPR011990	Pentatricopeptide repeat|Tetratricopeptide-like helical	GO:0005515	NULL	NULL
Dr16936	GO:0016772	NULL	probable l-type lectin-domain containing receptor kinase -like	IPR000719|IPR001220|IPR008985|IPR011009|IPR013320|IPR019825	Protein kinase domain|Legume lectin domain|Concanavalin A-like lectin/glucanases superfamily|Protein kinase-like domain|Concanavalin A-like lectin/glucanase, subgroup|Legume lectin, beta chain, Mn/Ca-binding site	GO:0004672|GO:0005524|GO:0006468|GO:0030246|GO:0016772	NULL	NULL
Dr16944	NULL	NULL	NULL	NULL	NULL	NULL	NULL	NULL
Dr16976	GO:0046872|GO:0020037|GO:0010311|GO:0005829	NULL	reduced lateral root formation protein	IPR001199|IPR018506	Cytochrome b5-like heme/steroid binding domain|Cytochrome b5, heme-binding site	GO:0020037	NULL	NULL
Dr16916	NULL	NULL	NULL	IPR002885|IPR011990	Pentatricopeptide repeat|Tetratricopeptide-like helical	GO:0005515	NULL	NULL
Dr16937	GO:0016772|GO:0009507	NULL	protein kinase domain-containing protein	IPR004147|IPR011009	UbiB domain|Protein kinase-like domain	GO:0016772	NULL	NULL
Dr16853	GO:0009536	NULL	octicosapeptide phox bem1p domain-containing protein	IPR000270|IPR011990	Phox/Bem1p|Tetratricopeptide-like helical	GO:0005515	NULL	NULL
Dr17051	GO:0016021|GO:0016853|GO:0004579|GO:0008250|GO:0018279	EC:2.4.1.119	dolichyl-diphosphooligosaccharide-protein glycosyltransferase subunit	IPR007676	Ribophorin I	GO:0004579|GO:0005783|GO:0006486|GO:0016021	EC:2.4.99.18	KEGG: 00510+2.4.99.18|KEGG: 00513+2.4.99.18|UniPathway: UPA00378
Dr17009	GO:0051536	NULL	glutaredoxin s17	IPR004480|IPR002109|IPR012336	Monothiol glutaredoxin-related|Glutaredoxin|Thioredoxin-like fold	GO:0009055|GO:0015035|GO:0045454	NULL	NULL
Dr17113	GO:0031167|GO:0009409|GO:0097159|GO:0009536|GO:0000179|GO:1901363	NULL	dimethyladenosine transferase	IPR001737|IPR023165|IPR020598	Ribosomal RNA adenine methylase transferase|rRNA adenine dimethylase-like|Ribosomal RNA adenine methylase transferase, N-terminal	GO:0000154|GO:0000179|GO:0008649	NULL	NULL
Dr17129	NULL	NULL	NULL	NULL	NULL	NULL	NULL	NULL
Dr17190	NULL	NULL	NULL	NULL	NULL	NULL	NULL	NULL
Dr17198	GO:0016023|GO:0003824	NULL	protein too many mouths-like	IPR001611|IPR003591	Leucine-rich repeat|Leucine-rich repeat, typical subtype	GO:0005515	NULL	NULL
Dr17219	NULL	NULL	NULL	IPR021629	Mediator complex, subunit Med23	NULL	NULL	NULL
Dr17276	GO:0008270	NULL	swim zinc finger-like protein	IPR007527	Zinc finger, SWIM-type	GO:0008270	NULL	NULL
Dr17300	NULL	NULL	NULL	IPR002885|IPR011990	Pentatricopeptide repeat|Tetratricopeptide-like helical	GO:0005515	NULL	NULL
Dr17338	GO:0009941|GO:0016491|GO:0009570|GO:0048046	NULL	protein	NULL	NULL	NULL	NULL	NULL
Dr17293	GO:0003964|GO:0006278|GO:0003723	EC:2.7.7.49	protein trichome birefringence-like 5	IPR026057	PC-Esterase	NULL	NULL	NULL
Dr17304	GO:0016021|GO:0010176|GO:0010189|GO:0009266|GO:0009915|GO:0046408|GO:0006636|GO:0009535|GO:0031347	EC:2.5.1.62	homogentisate phytyltransferase vte2-1	IPR000537	UbiA prenyltransferase family	GO:0004659|GO:0016021	EC:2.5.1.-	KEGG: 00130+2.5.1.-|KEGG: 00270+2.5.1.-|KEGG: 00361+2.5.1.-|KEGG: 00380+2.5.1.-|KEGG: 00860+2.5.1.-|KEGG: 00920+2.5.1.-
Dr17305	NULL	NULL	NULL	IPR002885|IPR011990	Pentatricopeptide repeat|Tetratricopeptide-like helical	GO:0005515	NULL	NULL
Dr04061	NULL	NULL	NULL	IPR001440|IPR001214|IPR011990|IPR019734|IPR013026	Tetratricopeptide TPR1|SET domain|Tetratricopeptide-like helical|Tetratricopeptide repeat|Tetratricopeptide repeat-containing domain	GO:0005515	NULL	NULL
Dr04053	NULL	NULL	NULL	IPR002885|IPR011990	Pentatricopeptide repeat|Tetratricopeptide-like helical	GO:0005515	NULL	NULL
Dr04113	GO:0009536	NULL	pentatricopeptide repeat-containing protein	IPR002885|IPR011990	Pentatricopeptide repeat|Tetratricopeptide-like helical	GO:0005515	NULL	NULL
Dr04136	GO:0051536|GO:0009294|GO:0046872|GO:0006355|GO:0035265|GO:0016573|GO:0004402|GO:0008283|GO:0000123|GO:0042967	EC:2.3.1.48	histone acetyltransferase	IPR007197|IPR023404|IPR006638|IPR005910	Radical SAM|Radical SAM, alpha/beta horseshoe|Elongator protein 3/MiaB/NifB|Histone acetyltransferase ELP3	GO:0003824|GO:0051536	EC:2.-.-.-	KEGG: 00231+2.-.-.-
Dr04165	GO:0006468|GO:0004712|GO:0005524|GO:0004674|GO:0009536|GO:0009069	EC:2.7.112.1|EC:2.7.11.0	serine threonine-protein kinase afc3	IPR000719|IPR011009|IPR002290|IPR008271	Protein kinase domain|Protein kinase-like domain|Serine/threonine- / dual specificity protein kinase, catalytic domain|Serine/threonine-protein kinase, active site	GO:0004672|GO:0005524|GO:0006468|GO:0016772|GO:0004674	NULL	NULL
Dr04190	GO:0005730|GO:0003723|GO:0006364|GO:0030529	NULL	ribosomal rna assembly protein mis3-like	IPR024166	Ribosomal RNA assembly KRR1	NULL	NULL	NULL
Dr04236	GO:0006412|GO:0005618|GO:0005730|GO:0003735|GO:0022627|GO:0000166|GO:0009507|GO:0005886|GO:0042254	NULL	mms19 nucleotide excision repair protein	IPR001976|IPR024687|IPR016024|IPR012678|IPR011989|IPR012677	Ribosomal protein S24e|RNAPII transcription regulator C-terminal|Armadillo-type fold|Ribosomal protein L23/L15e core domain|Armadillo-like helical|Nucleotide-binding, alpha-beta plait	GO:0003735|GO:0005622|GO:0005840|GO:0006412|GO:0005488|GO:0000166	NULL	NULL
Dr04310	GO:0006351	NULL	scarecrow-like protein 4-like	IPR005202	Transcription factor GRAS	NULL	NULL	NULL
Dr17393	GO:0051501|GO:0004311|GO:0009536|GO:0006694|GO:0016114	EC:2.5.1.29	geranylgeranyl pyrophosphate synthase 4	IPR017446|IPR000092|IPR008949	Polyprenyl synthetase-related|Polyprenyl synthetase|Terpenoid synthase	GO:0008299	NULL	NULL
Dr17481	GO:0009536	NULL	uncharacterized protein	IPR025638	Protein of unknown function DUF4336	NULL	NULL	NULL
Dr17666	GO:0071446|GO:0004004|GO:0003676|GO:0071369|GO:0006968|GO:0071395|GO:0005524|GO:0009817|GO:0009507	NULL	dead-box atp-dependent rna helicase 50-like	IPR001041|IPR011545|IPR001650|IPR027417|IPR012675|IPR014001|IPR014014	2Fe-2S ferredoxin-type domain|DNA/RNA helicase, DEAD/DEAH box type, N-terminal|Helicase, C-terminal|P-loop containing nucleoside triphosphate hydrolase|Beta-grasp domain|Helicase, superfamily 1/2, ATP-binding domain|RNA helicase, DEAD-box type, Q motif	GO:0009055|GO:0051536|GO:0003676|GO:0005524|GO:0008026|GO:0004386	NULL	NULL
Dr17626	GO:0046872|GO:0016023|GO:0008237	NULL	metalloendoproteinase 1	IPR001818|IPR002477|IPR024079|IPR021190|IPR006026	Peptidase M10, metallopeptidase|Peptidoglycan binding-like|Peptidase M10A|Metallopeptidase, catalytic domain|Peptidase, metallopeptidase	GO:0004222|GO:0006508|GO:0008270|GO:0031012|GO:0008237	NULL	NULL
Dr17693	NULL	NULL	NULL	IPR024964|IPR006595|IPR013144|IPR006594	CTLH/CRA C-terminal to LisH motif domain|CTLH, C-terminal LisH motif|CRA domain|LisH dimerisation motif	GO:0005515	NULL	NULL
Dr04351	GO:0017004|GO:0030288|GO:0015439|GO:0006200|GO:0005524|GO:0015886	EC:3.6.3.41	abc transporter family protein	IPR003439|IPR027417|IPR003593|IPR005895	ABC transporter-like|P-loop containing nucleoside triphosphate hydrolase|AAA+ ATPase domain|ABC transporter, haem export, CcmA	GO:0005524|GO:0016887|GO:0000166|GO:0017111|GO:0005215|GO:0017004|GO:0030288	NULL	NULL
Dr04360	GO:0003700|GO:0005739|GO:0006355|GO:0005667|GO:0045449	NULL	membrane-associated salt-inducible protein	IPR002885|IPR011990	Pentatricopeptide repeat|Tetratricopeptide-like helical	GO:0005515	NULL	NULL
Dr04375	GO:0042545|GO:0004091|GO:0016023|GO:0005618|GO:0030599|GO:0045330|GO:0004857|GO:0043086|GO:0045490|GO:0005982|GO:0005985	EC:3.1.1.1|EC:3.1.1.11	pectinesterase family protein	IPR000070|IPR006501|IPR011050|IPR012334|IPR018040	Pectinesterase, catalytic|Pectinesterase inhibitor domain|Pectin lyase fold/virulence factor|Pectin lyase fold|Pectinesterase, active site	GO:0005618|GO:0030599|GO:0042545|GO:0004857	EC:3.1.1.11	KEGG: 00040+3.1.1.11|KEGG: 00500+3.1.1.11|MetaCyc: PWY-1081|MetaCyc: PWY-7243|MetaCyc: PWY-7246|MetaCyc: PWY-7248|UniPathway: UPA00545
Dr04379	GO:0004386|GO:0000166	NULL	pre-mrna-splicing factor atp-dependent rna helicase prp16	IPR001650|IPR007502|IPR011709|IPR027417|IPR014001|IPR002464	Helicase, C-terminal|Helicase-associated domain|Domain of unknown function DUF1605|P-loop containing nucleoside triphosphate hydrolase|Helicase, superfamily 1/2, ATP-binding domain|DNA/RNA helicase, ATP-dependent, DEAH-box type, conserved site	GO:0003676|GO:0004386|GO:0005524|GO:0008026	NULL	NULL
Dr04385	GO:0006810|GO:0044763|GO:0048856|GO:0005509|GO:0006457|GO:0009856|GO:0048610|GO:0071944|GO:0005788|GO:0051082|GO:0007275|GO:0003006	NULL	probable exocyst complex component 4-like	IPR001580|IPR007191|IPR008985|IPR009033|IPR013320|IPR018124	Calreticulin/calnexin|Sec8 exocyst complex component specific domain|Concanavalin A-like lectin/glucanases superfamily|Calreticulin/calnexin, P domain|Concanavalin A-like lectin/glucanase, subgroup|Calreticulin/calnexin, conserved site	GO:0005509|GO:0005783|GO:0006457|GO:0051082|GO:0000145|GO:0006904|GO:0015031|GO:0005515	NULL	NULL
Dr04428	GO:0016023|GO:0071944	NULL	nodal modulator 1-like	IPR013784|IPR008969|IPR008970|IPR013783|IPR014766	Carbohydrate-binding-like fold|Carboxypeptidase-like, regulatory domain|Collagen-binding surface protein Cna, B-type domain|Immunoglobulin-like fold|Carboxypeptidase, regulatory domain	GO:0030246	NULL	NULL
Dr04441	GO:0005739	NULL	pentatricopeptide repeat-containing protein	IPR002885|IPR011990	Pentatricopeptide repeat|Tetratricopeptide-like helical	GO:0005515	NULL	NULL
Dr04443	NULL	NULL	NULL	IPR002885|IPR011990	Pentatricopeptide repeat|Tetratricopeptide-like helical	GO:0005515	NULL	NULL
Dr04478	GO:0046872|GO:0004722|GO:0050688|GO:0006470|GO:0008287	NULL	protein phosphatase 2c	IPR015655|IPR001932|IPR000222	Protein phosphatase 2C|Protein phosphatase 2C (PP2C)-like domain|Protein phosphatase 2C, manganese/magnesium aspartate binding site	GO:0003824|GO:0004722|GO:0006470	NULL	NULL
Dr17736	GO:0032259|GO:0008168	EC:2.1.1.0	protein arginine n-methyltransferase	IPR025799|IPR014644|IPR025802	Protein arginine N-methyltransferase|Protein arginine N-methyltransferase PRMT7|Protein arginine N-methyltransferase PRMT7, plants	GO:0006479|GO:0008168	EC:2.1.1.-	KEGG: 00130+2.1.1.-|KEGG: 00253+2.1.1.-|KEGG: 00270+2.1.1.-|KEGG: 00340+2.1.1.-|KEGG: 00350+2.1.1.-|KEGG: 00360+2.1.1.-|KEGG: 00380+2.1.1.-|KEGG: 00450+2.1.1.-|KEGG: 00522+2.1.1.-|KEGG: 00624+2.1.1.-|KEGG: 00627+2.1.1.-|KEGG: 00860+2.1.1.-|KEGG: 00940+2.1.1.-|KEGG: 00941+2.1.1.-|KEGG: 00942+2.1.1.-|KEGG: 00945+2.1.1.-|KEGG: 00950+2.1.1.-|KEGG: 00981+2.1.1.-
Dr17744	GO:0044444|GO:0043231|GO:0008236	NULL	acylamino-acid-releasing enzyme	IPR001375|IPR011042|IPR002471	Peptidase S9, prolyl oligopeptidase, catalytic domain|Six-bladed beta-propeller, TolB-like|Peptidase S9, serine active site	GO:0006508|GO:0008236|GO:0004252	NULL	NULL
Dr04561	GO:0009536	NULL	pentatricopeptide repeat-containing protein	IPR002885|IPR011990	Pentatricopeptide repeat|Tetratricopeptide-like helical	GO:0005515	NULL	NULL
Dr04597	NULL	NULL	NULL	NULL	NULL	NULL	NULL	NULL
Dr18155	GO:0009414|GO:0005975|GO:0008184|GO:0030170|GO:0046686|GO:0009507	NULL	alpha-glucan h isozyme-like	IPR000811|IPR011833	Glycosyl transferase, family 35|Glycogen/starch/alpha-glucan phosphorylase	GO:0005975|GO:0008184|GO:0004645|GO:0030170	EC:2.4.1.1	KEGG: 00500+2.4.1.1|MetaCyc: PWY-5941|MetaCyc: PWY-622|MetaCyc: PWY-6731|MetaCyc: PWY-6737|MetaCyc: PWY-7238|Reactome: REACT_474
Dr18190	GO:0009534|GO:0031977	NULL	protein	IPR001646	Pentapeptide repeat	NULL	NULL	NULL
Dr18244	NULL	NULL	NULL	IPR004365|IPR012340	OB-fold nucleic acid binding domain, AA-tRNA synthetase-type|Nucleic acid-binding, OB-fold	GO:0003676	NULL	NULL
Dr18297	GO:0032991|GO:0044424	NULL	u3 small nucleolar rna-associated protein	IPR006709	Small-subunit processome, Utp14	GO:0006364|GO:0032040	NULL	NULL
Dr18265	GO:0046872	NULL	programmed cell death protein 2-like	IPR002893|IPR007320	Zinc finger, MYND-type|Programmed cell death protein 2, C-terminal	GO:0005737	NULL	NULL
Dr18303	GO:0009987|GO:0005739|GO:0016772|GO:0000166	NULL	ubiquitin carboxyl-terminal hydrolase-like protein	IPR021099	Plant organelle RNA recognition domain	NULL	NULL	NULL
Dr04703	GO:0008233|GO:0009451|GO:0016798|GO:0016462|GO:0016853	NULL	rna pseudourine synthase 1-like	IPR006145|IPR020103|IPR006224	Pseudouridine synthase, RsuA/RluB/C/D/E/F|Pseudouridine synthase, catalytic domain|Pseudouridine synthase, RluC/RluD, conserved site	GO:0001522|GO:0003723|GO:0009451|GO:0009982	NULL	NULL
Dr04736	GO:0009941|GO:0005773|GO:0016023|GO:0005886	NULL	pentatricopeptide repeat-containing protein	IPR002885	Pentatricopeptide repeat	NULL	NULL	NULL
Dr18323	GO:0009536	NULL	pentatricopeptide repeat-containing protein	IPR002885|IPR011990	Pentatricopeptide repeat|Tetratricopeptide-like helical	GO:0005515	NULL	NULL
Dr04800	GO:0016627|GO:0004129|GO:0005751|GO:0006784|GO:0009060|GO:0006123|GO:0015992	EC:1.9.3.1	cytochrome c oxidase assembly protein cox15-like	IPR003780	Heme A synthase	GO:0006784|GO:0016020|GO:0016627|GO:0055114	EC:1.3.-.-	KEGG: 00351+1.3.-.-|KEGG: 00363+1.3.-.-|KEGG: 00624+1.3.-.-|UniPathway: UPA00269
Dr04794	GO:0006508|GO:0004190	EC:3.4.23.0	dna damage-inducible protein 1	IPR000626|IPR000449|IPR019103|IPR009060|IPR021109|IPR015940|IPR019955	Ubiquitin domain|Ubiquitin-associated domain/translation elongation factor EF-Ts, N-terminal|Aspartic peptidase, DDI1-type|UBA-like|Aspartic peptidase domain|Ubiquitin-associated/translation elongation factor EF1B, N-terminal, eukaryote|Ubiquitin supergroup	GO:0005515|GO:0004190|GO:0006508	NULL	NULL
Dr04821	GO:0016023|GO:0016021|GO:0005773|GO:0005794|GO:0005886	NULL	transmembrane 9 superfamily member 4-like	IPR004240	Nonaspanin (TM9SF)	GO:0016021	NULL	NULL
Dr04853	NULL	NULL	NULL	IPR012458	Protein of unknown function DUF1664	NULL	NULL	NULL
Dr04960	GO:0008233|GO:0016491|GO:0016023|GO:0008152	NULL	protein	IPR013128|IPR000668|IPR000118|IPR013201|IPR000169|IPR025660|IPR025661	Peptidase C1A, papain|Peptidase C1A, papain C-terminal|Granulin|Proteinase inhibitor I29, cathepsin propeptide|Cysteine peptidase, cysteine active site|Cysteine peptidase, histidine active site|Cysteine peptidase, asparagine active site	GO:0008234|GO:0006508	NULL	NULL
Dr18685	NULL	NULL	NULL	IPR019787|IPR011011|IPR013083|IPR001965|IPR019786	Zinc finger, PHD-finger|Zinc finger, FYVE/PHD-type|Zinc finger, RING/FYVE/PHD-type|Zinc finger, PHD-type|Zinc finger, PHD-type, conserved site	GO:0005515|GO:0008270	NULL	NULL
Dr18656	GO:0004672|GO:0010051|GO:0016491|GO:0016023|GO:0009755|GO:0000166|GO:0016310|GO:0016020	NULL	serine threonine-protein kinase bri1-like 2	IPR000719|IPR001611|IPR013210|IPR025875|IPR011009|IPR013320|IPR002290|IPR003591|IPR017441|IPR008271	Protein kinase domain|Leucine-rich repeat|Leucine-rich repeat-containing N-terminal, type 2|Leucine rich repeat 4|Protein kinase-like domain|Concanavalin A-like lectin/glucanase, subgroup|Serine/threonine- / dual specificity protein kinase, catalytic domain|Leucine-rich repeat, typical subtype|Protein kinase, ATP binding site|Serine/threonine-protein kinase, active site	GO:0004672|GO:0005524|GO:0006468|GO:0005515|GO:0016772|GO:0004674	NULL	NULL
Dr18651	NULL	NULL	NULL	IPR002885|IPR011990	Pentatricopeptide repeat|Tetratricopeptide-like helical	GO:0005515	NULL	NULL
Dr04992	GO:0006810|GO:0042626|GO:0043190|GO:0005524	NULL	abc transporter g family member 7	IPR003439|IPR013525|IPR027417|IPR003593	ABC transporter-like|ABC-2 type transporter|P-loop containing nucleoside triphosphate hydrolase|AAA+ ATPase domain	GO:0005524|GO:0016887|GO:0016020|GO:0000166|GO:0017111	NULL	NULL
Dr05083	GO:0016740	NULL	pentatricopeptide repeat-containing protein	NULL	NULL	NULL	NULL	NULL
Dr05087	NULL	NULL	NULL	NULL	NULL	NULL	NULL	NULL
Dr05079	GO:0032301|GO:0030983|GO:0032302|GO:0005524|GO:0006298|GO:0045128|GO:0005886	NULL	dna mismatch repair protein msh2	NULL	NULL	NULL	NULL	NULL
Dr05132	GO:0005773|GO:0006508|GO:0009536|GO:0004177	EC:3.4.11.0	peptidase family protein	NULL	NULL	NULL	NULL	NULL
Dr05136	GO:0005739	NULL	protein dgcr14	NULL	NULL	NULL	NULL	NULL
Dr00038	GO:0016023	NULL	uncharacterized membrane protein at1g75140-like	IPR017986	WD40-repeat-containing domain	GO:0005515	NULL	NULL
Dr00120	GO:0016787	NULL	histone deacetylase	IPR000286|IPR023801|IPR007053	Histone deacetylase superfamily|Histone deacetylase domain|LRAT-like domain	NULL	NULL	NULL
Dr00114	NULL	NULL	NULL	IPR002885|IPR011990	Pentatricopeptide repeat|Tetratricopeptide-like helical	GO:0005515	NULL	NULL
Dr00180	GO:0016301|GO:0000166	NULL	serine threonine-protein kinase-like protein at3g51990-like	IPR001245|IPR011009|IPR002290|IPR000719|IPR017441|IPR008271	Serine-threonine/tyrosine-protein kinase catalytic domain|Protein kinase-like domain|Serine/threonine- / dual specificity protein kinase, catalytic domain|Protein kinase domain|Protein kinase, ATP binding site|Serine/threonine-protein kinase, active site	GO:0004672|GO:0006468|GO:0016772|GO:0005524|GO:0004674	NULL	NULL
Dr18952	NULL	NULL	NULL	IPR006904	Protein of unknown function DUF716, TMEM45	NULL	NULL	NULL
Dr19028	GO:0080042|GO:0005739|GO:0080041|GO:0009507	NULL	nudix hydrolase chloroplastic-like	IPR015797	NUDIX hydrolase domain-like	GO:0016787	NULL	NULL
Dr19098	GO:0009536|GO:0016740	NULL	gcn5-related n-acetyltransferase family-like protein	IPR000182|IPR016181	GNAT domain|Acyl-CoA N-acyltransferase	GO:0008080	NULL	NULL
Dr19103	GO:0005840|GO:0003735|GO:0006412|GO:0005739|GO:0042254	NULL	ribosomal protein l12 atp-dependent clp protease adaptor protein	IPR015608|IPR013823|IPR014719	Putative ribosomal protein L7/L12, plants|Ribosomal protein L7/L12, C-terminal|Ribosomal protein L7/L12, C-terminal/adaptor protein ClpS-like	GO:0003735|GO:0005622|GO:0005840|GO:0006412	NULL	NULL
Dr05205	GO:0005739	NULL	pentatricopeptide repeat-containing protein	NULL	NULL	NULL	NULL	NULL
Dr05291	GO:0004252|GO:0009840|GO:0050897|GO:0005759|GO:0006508|GO:0008270|GO:0009535	EC:3.4.21.0	atp-dependent clp protease proteolytic subunit	NULL	NULL	NULL	NULL	NULL
Dr19376	GO:0044763|GO:0097159|GO:0043170|GO:0004386|GO:1901363|GO:0009507	NULL	dead-box atp-dependent rna helicase chloroplastic-like	IPR011545|IPR001650|IPR027417|IPR014001	DNA/RNA helicase, DEAD/DEAH box type, N-terminal|Helicase, C-terminal|P-loop containing nucleoside triphosphate hydrolase|Helicase, superfamily 1/2, ATP-binding domain	GO:0003676|GO:0005524|GO:0008026|GO:0004386	NULL	NULL
Dr19383	GO:0003676|GO:0008270|GO:0009536	NULL	protein	IPR021139	NYN domain, limkain-b1-type	NULL	NULL	NULL
Dr05412	GO:0044464	NULL	aspartic proteinase nepenthesin-2-like	NULL	NULL	NULL	NULL	NULL
Dr05414	GO:0005739	NULL	transcription termination factor domain-containing protein	NULL	NULL	NULL	NULL	NULL
Dr05482	GO:0009536	NULL	nucleotide binding	NULL	NULL	NULL	NULL	NULL
Dr19397	GO:0047617	EC:3.1.2.20	acyl-coenzyme a thioesterase 8-like	IPR003703|IPR000595|IPR018490|IPR014710|IPR018488	Acyl-CoA thioesterase|Cyclic nucleotide-binding domain|Cyclic nucleotide-binding-like|RmlC-like jelly roll fold|Cyclic nucleotide-binding, conserved site	GO:0006637|GO:0047617	NULL	NULL
Dr19439	GO:0055085|GO:0005315|GO:0031969|GO:0016021|GO:0006817	NULL	probable anion transporter chloroplastic-like	IPR011701|IPR016196|IPR020846	Major facilitator superfamily|Major facilitator superfamily domain, general substrate transporter|Major facilitator superfamily domain	GO:0016021|GO:0055085	NULL	NULL
Dr19442	GO:0004553|GO:0005975|GO:0005773	EC:3.2.1.0	beta-d-glucan exohydrolase-like protein	IPR026892|IPR001764|IPR002772|IPR017853	Glycoside hydrolase family 3|Glycoside hydrolase, family 3, N-terminal|Glycoside hydrolase family 3 C-terminal domain|Glycoside hydrolase, superfamily	GO:0004553|GO:0005975	NULL	NULL
Dr19501	NULL	NULL	NULL	NULL	NULL	NULL	NULL	NULL
Dr19498	NULL	NULL	NULL	IPR000270	Phox/Bem1p	GO:0005515	NULL	NULL
Dr05684	NULL	NULL	NULL	NULL	NULL	NULL	NULL	NULL
Dr19701	NULL	NULL	NULL	NULL	NULL	NULL	NULL	NULL
Dr19714	NULL	NULL	NULL	IPR006285|IPR000594|IPR009036|IPR016040	Ubiquitin-like modifier-activating enzyme Atg7|UBA/THIF-type NAD/FAD binding fold|Molybdenum cofactor biosynthesis, MoeB|NAD(P)-binding domain	GO:0005737|GO:0006914|GO:0003824	NULL	NULL
Dr19730	GO:0005739|GO:0006200|GO:0005524|GO:0016887|GO:0046686	EC:3.6.1.3	abc transporter family protein	IPR003439|IPR027417|IPR003593|IPR017871	ABC transporter-like|P-loop containing nucleoside triphosphate hydrolase|AAA+ ATPase domain|ABC transporter, conserved site	GO:0005524|GO:0016887|GO:0000166|GO:0017111	NULL	NULL
Dr19734	GO:0003677|GO:0004518|GO:0006281	NULL	flap endonuclease gen-like 2	IPR006084|IPR006086|IPR020045	XPG/Rad2 endonuclease|XPG-I domain|5'-3' exonuclease, C-terminal domain	GO:0004518|GO:0006281|GO:0003677|GO:0003824	NULL	NULL
Dr19802	NULL	NULL	NULL	IPR001440|IPR011990|IPR019734|IPR013026	Tetratricopeptide TPR1|Tetratricopeptide-like helical|Tetratricopeptide repeat|Tetratricopeptide repeat-containing domain	GO:0005515	NULL	NULL
Dr19827	NULL	NULL	NULL	IPR013069|IPR011333|IPR000210	BTB/POZ|BTB/POZ fold|BTB/POZ-like	GO:0005515	NULL	NULL
Dr19832	NULL	NULL	NULL	IPR002885|IPR011990	Pentatricopeptide repeat|Tetratricopeptide-like helical	GO:0005515	NULL	NULL
Dr05724	GO:0005509|GO:0006184|GO:0003924|GO:0005525	NULL	eps15 homology domain 1 protein	NULL	NULL	NULL	NULL	NULL
Dr05761	GO:0030942|GO:0006614|GO:0005786|GO:0005047|GO:0008312	NULL	signal recognition particle 68 kda	NULL	NULL	NULL	NULL	NULL
Dr05817	GO:0009536	NULL	zinc finger protein chloroplastic-like	NULL	NULL	NULL	NULL	NULL
Dr20063	GO:0050896|GO:0046872|GO:0005634	NULL	c2-h2 zinc finger protein	IPR013087|IPR015880|IPR007087	Zinc finger C2H2-type/integrase DNA-binding domain|Zinc finger, C2H2-like|Zinc finger, C2H2	GO:0003676|GO:0046872	NULL	NULL
Dr05884	NULL	NULL	NULL	NULL	NULL	NULL	NULL	NULL
Dr05880	GO:0008233	NULL	aspartic proteinase nepenthesin-2	NULL	NULL	NULL	NULL	NULL
Dr05959	GO:0008270	NULL	ring-h2 finger protein atl65-like	NULL	NULL	NULL	NULL	NULL
Dr06081	GO:0009536|GO:0006184|GO:0042254|GO:0003924|GO:0005525	NULL	ribosome biogenesis gtp-binding protein	IPR006073|IPR004265|IPR027417|IPR023179|IPR019991	GTP binding domain|Plant disease resistance response protein|P-loop containing nucleoside triphosphate hydrolase|GTP-binding protein, orthogonal bundle domain|GTP-binding protein, ribosome biogenesis, YlqF	GO:0005525	NULL	NULL
Dr06101	GO:0019898|GO:0005509|GO:0009507|GO:0015979|GO:0009654	NULL	domain-containing protein	IPR002683|IPR016123	Photosystem II PsbP, oxygen evolving complex|Mog1/PsbP, alpha/beta/alpha sandwich	GO:0005509|GO:0009523|GO:0009654|GO:0015979|GO:0019898	NULL	NULL
Dr06055	NULL	NULL	NULL	IPR002885|IPR005227|IPR012337|IPR011990|IPR006641	Pentatricopeptide repeat|Resolvase, holliday junction-type, YqgF-like|Ribonuclease H-like domain|Tetratricopeptide-like helical|YqgF/RNase H-like domain	GO:0005737|GO:0006281|GO:0006310|GO:0006974|GO:0016788|GO:0003676|GO:0005515|GO:0006139	NULL	NULL
Dr06067	GO:0005886|GO:0006468|GO:0005524|GO:0004674|GO:0009069	EC:2.7.11.0	protein	IPR000719|IPR000858|IPR001480|IPR011009|IPR013320|IPR002290|IPR024171|IPR017441|IPR008271	Protein kinase domain|S-locus glycoprotein|Bulb-type lectin domain|Protein kinase-like domain|Concanavalin A-like lectin/glucanase, subgroup|Serine/threonine- / dual specificity protein kinase, catalytic domain|S-receptor-like serine/threonine-protein kinase|Protein kinase, ATP binding site|Serine/threonine-protein kinase, active site	GO:0004672|GO:0005524|GO:0006468|GO:0048544|GO:0016772|GO:0004674	NULL	NULL
Dr06093	GO:0006476|GO:0008270|GO:0031348|GO:0042742|GO:0070403|GO:0006471|GO:0005759|GO:0034979|GO:0005634	NULL	sirtuin 2	IPR003000|IPR026591|IPR026590|IPR026587	Sirtuin family|Sirtuin family, catalytic core small domain|Sirtuin family, catalytic core domain|Sirtuin family, class II	GO:0070403	EC:3.5.1.-	KEGG: 00240+3.5.1.-|KEGG: 00260+3.5.1.-|KEGG: 00364+3.5.1.-|KEGG: 00480+3.5.1.-|KEGG: 00520+3.5.1.-|KEGG: 00600+3.5.1.-|KEGG: 00760+3.5.1.-|KEGG: 00930+3.5.1.-
Dr20128	NULL	NULL	NULL	IPR002885	Pentatricopeptide repeat	NULL	NULL	NULL
Dr20082	GO:0009536	NULL	pentatricopeptide repeat-containing protein	IPR002885|IPR011990	Pentatricopeptide repeat|Tetratricopeptide-like helical	GO:0005515	NULL	NULL
Dr20129	GO:0005488	NULL	protein phytoclock 1	IPR001005|IPR009057|IPR006447|IPR017930	SANT/Myb domain|Homeodomain-like|Myb domain, plants|Myb domain	GO:0003682|GO:0003677	NULL	NULL
Dr20085	GO:0055085|GO:0006468|GO:0004674|GO:0016021|GO:0005315|GO:0005524|GO:0031969|GO:0009069|GO:0006817	EC:2.7.11.0	anion transporter 4	IPR011701|IPR016196|IPR020846	Major facilitator superfamily|Major facilitator superfamily domain, general substrate transporter|Major facilitator superfamily domain	GO:0016021|GO:0055085	NULL	NULL
Dr20156	GO:0004252|GO:0016023|GO:0005618|GO:0008152	EC:3.4.21.0	subtilisin-like protease-like	IPR015500|IPR000209|IPR003137|IPR010259|IPR023828	Peptidase S8, subtilisin-related|Peptidase S8/S53 domain|Protease-associated domain, PA|Proteinase inhibitor I9|Peptidase S8, subtilisin, Ser-active site	GO:0004252|GO:0006508|GO:0042802|GO:0043086	NULL	NULL
Dr20187	GO:0016020|GO:0016023|GO:0005488	NULL	tmem87a protein	IPR009637|IPR001564	Transmembrane receptor, eukaryota|Nucleoside diphosphate kinase	GO:0016021|GO:0004550|GO:0005524|GO:0006165|GO:0006183|GO:0006228|GO:0006241	EC:2.7.4.6	KEGG: 00230+2.7.4.6|KEGG: 00240+2.7.4.6|MetaCyc: PWY-6545|MetaCyc: PWY-7176|MetaCyc: PWY-7184|MetaCyc: PWY-7187|MetaCyc: PWY-7197|MetaCyc: PWY-7198|MetaCyc: PWY-7205|MetaCyc: PWY-7210|MetaCyc: PWY-7220|MetaCyc: PWY-7221|MetaCyc: PWY-7222|MetaCyc: PWY-7224|MetaCyc: PWY-7226|MetaCyc: PWY-7227
Dr20163	GO:0009408	NULL	kda class iii heat shock	IPR002068|IPR008978	Alpha crystallin/Hsp20 domain|HSP20-like chaperone	NULL	NULL	NULL
Dr20404	GO:0009507	NULL	protein	IPR018962	Domain of unknown function DUF1995	NULL	NULL	NULL
Dr20420	GO:0005759|GO:0005525|GO:0005743|GO:0006184|GO:0043022|GO:0045727|GO:0003924	NULL	gtp-binding protein	IPR000795|IPR000640|IPR013842|IPR009000|IPR027417|IPR009022|IPR005225|IPR006297	Elongation factor, GTP-binding domain|Translation elongation factor EFG, V domain|GTP-binding protein LepA, C-terminal|Translation protein, beta-barrel domain|P-loop containing nucleoside triphosphate hydrolase|Elongation factor G, III-V domain|Small GTP-binding protein domain|Elongation factor 4	GO:0003924|GO:0005525	NULL	NULL
Dr20550	GO:1901363|GO:0097159	NULL	f-box family protein	IPR001810|IPR002182|IPR027417|IPR000767|IPR019955	F-box domain|NB-ARC|Disease resistance protein|P-loop containing nucleoside triphosphate hydrolase|Ubiquitin supergroup	GO:0005515|GO:0043531|GO:0006952	NULL	NULL
Dr20562	NULL	NULL	NULL	IPR002885|IPR011990	Pentatricopeptide repeat|Tetratricopeptide-like helical	GO:0005515	NULL	NULL
Dr20574	GO:0005739|GO:0005794	NULL	o-fucosyltransferase family protein	NULL	NULL	NULL	NULL	NULL
Dr20586	GO:0009987|GO:0009856|GO:0016757|GO:0016020|GO:0044707	NULL	phosphatidylinositol n-acetylglucosaminyltransferase subunit c	IPR009450	Phosphatidylinositol N-acetylglucosaminyltransferase subunit C	GO:0006506|GO:0016021|GO:0017176	EC:2.4.1.198	KEGG: 00563+2.4.1.198|UniPathway: UPA00196
Dr20589	GO:0005739	NULL	ubiquinol-cytochrome c chaperone family protein	IPR007129|IPR021150	Ubiquinol-cytochrome c chaperone, CBP3|Ubiquinol-cytochrome c chaperone/UPF0174	NULL	NULL	NULL
Dr06164	NULL	NULL	NULL	IPR011989	Armadillo-like helical	NULL	NULL	NULL
Dr06177	GO:0016740|GO:0046686	NULL	intracellular chloride channel-like protein	IPR016639|IPR004046|IPR004045|IPR010987|IPR012336	Glutathione S-transferase (GST)|Glutathione S-transferase, C-terminal|Glutathione S-transferase, N-terminal|Glutathione S-transferase, C-terminal-like|Thioredoxin-like fold	GO:0005515	EC:2.5.1.18	KEGG: 00480+2.5.1.18|KEGG: 00980+2.5.1.18|KEGG: 00982+2.5.1.18|MetaCyc: PWY-4061|MetaCyc: PWY-6842|MetaCyc: PWY-7112
Dr06322	GO:0015171|GO:0044464|GO:0006865|GO:0016020	NULL	uncharacterized amino acid permease -like	IPR002293	Amino acid/polyamine transporter I	GO:0003333|GO:0015171|GO:0016020	NULL	NULL
Dr06307	GO:0004386|GO:0000166	NULL	atp-dependent rna	IPR001650|IPR007502|IPR011709|IPR027417|IPR014001|IPR002464	Helicase, C-terminal|Helicase-associated domain|Domain of unknown function DUF1605|P-loop containing nucleoside triphosphate hydrolase|Helicase, superfamily 1/2, ATP-binding domain|DNA/RNA helicase, ATP-dependent, DEAH-box type, conserved site	GO:0003676|GO:0004386|GO:0005524|GO:0008026	NULL	NULL
Dr06340	GO:0046872|GO:0006572|GO:0004411|GO:0006559|GO:0055114|GO:0042207	EC:1.13.11.5	homogentisate -dioxygenase	IPR005708|IPR011051|IPR014710	Homogentisate 1,2-dioxygenase|RmlC-like cupin domain|RmlC-like jelly roll fold	GO:0004411|GO:0006559|GO:0006570|GO:0055114	EC:1.13.11.5	KEGG: 00350+1.13.11.5|KEGG: 00643+1.13.11.5|UniPathway: UPA00139
Dr06397	NULL	NULL	NULL	IPR019038	DNA polymerase subunit Cdc27	GO:0005634|GO:0006260	NULL	NULL
Dr06413	GO:0009536|GO:0006184|GO:0003924|GO:0005525	NULL	dynamin-like protein c-like	IPR022812|IPR001401|IPR001245|IPR027417|IPR011009|IPR002290|IPR000719|IPR008271	Dynamin superfamily|Dynamin, GTPase domain|Serine-threonine/tyrosine-protein kinase catalytic domain|P-loop containing nucleoside triphosphate hydrolase|Protein kinase-like domain|Serine/threonine- / dual specificity protein kinase, catalytic domain|Protein kinase domain|Serine/threonine-protein kinase, active site	GO:0003924|GO:0005525|GO:0004672|GO:0006468|GO:0016772|GO:0005524|GO:0004674	NULL	NULL
Dr06419	NULL	NULL	NULL	NULL	NULL	NULL	NULL	NULL
Dr06408	GO:0048554|GO:0016151|GO:0016023|GO:0031072|GO:0006807|GO:0051082	NULL	urease accessory protein	IPR002639	Urease accessory protein UreF	GO:0006807|GO:0016151	NULL	NULL
Dr06464	GO:0048564|GO:0009535|GO:0005739	NULL	tetratricopeptide repeat-containing protein	IPR011990|IPR019734|IPR013026	Tetratricopeptide-like helical|Tetratricopeptide repeat|Tetratricopeptide repeat-containing domain	GO:0005515	NULL	NULL
Dr06501	GO:0071366|GO:0048364|GO:0016021|GO:0009926|GO:0015416|GO:0006200|GO:0005886|GO:0005524|GO:0015716|GO:0015748	EC:3.6.3.28	pleiotropic drug resistance protein 3-like	IPR003439|IPR013525|IPR013581|IPR027417|IPR003593	ABC transporter-like|ABC-2 type transporter|Plant PDR ABC transporter associated|P-loop containing nucleoside triphosphate hydrolase|AAA+ ATPase domain	GO:0005524|GO:0016887|GO:0016020|GO:0000166|GO:0017111	NULL	NULL
Dr06470	NULL	NULL	NULL	IPR019716|IPR012336	Ribosomal protein L53, mitochondrial|Thioredoxin-like fold	NULL	NULL	NULL
Dr25889	NULL	NULL	NULL	NULL	NULL	NULL	NULL	NULL
Dr20717	GO:0009611|GO:0009631|GO:0004708|GO:0042542|GO:0009414|GO:0009651|GO:0042742|GO:0005737|GO:0004674|GO:0009814|GO:0002237|GO:0005886|GO:0005524|GO:0000187|GO:0009069	EC:2.7.11.0	map kinase kinase	IPR000719|IPR011009|IPR002290|IPR017441|IPR008271	Protein kinase domain|Protein kinase-like domain|Serine/threonine- / dual specificity protein kinase, catalytic domain|Protein kinase, ATP binding site|Serine/threonine-protein kinase, active site	GO:0004672|GO:0005524|GO:0006468|GO:0016772|GO:0004674	NULL	NULL
Dr20788	GO:0008233|GO:0008168|GO:0032259|GO:0006508	EC:2.1.1.0	s-adenosyl-l-methionine-dependent methyltransferase-like protein	IPR025714	Methyltransferase domain	NULL	NULL	NULL
Dr20798	GO:0031957|GO:0004467|GO:0010025|GO:0010143|GO:0001676|GO:0050832|GO:0010311	EC:6.2.1.3	long chain acyl- synthetase 2-like	IPR000873|IPR020845	AMP-dependent synthetase/ligase|AMP-binding, conserved site	GO:0003824|GO:0008152	NULL	NULL
Dr06527	GO:0009535|GO:0031977|GO:0006979	NULL	chloroplast lipocalin	IPR000566|IPR011038|IPR012674|IPR022272	Lipocalin/cytosolic fatty-acid binding domain|Calycin-like|Calycin|Lipocalin conserved site	NULL	NULL	NULL
Dr06567	GO:0009536	NULL	pentatricopeptide repeat-containing protein	IPR002885|IPR011990	Pentatricopeptide repeat|Tetratricopeptide-like helical	GO:0005515	NULL	NULL
Dr20908	GO:0009579|GO:0009507	NULL	thylakoid lumenal protein	IPR001646	Pentapeptide repeat	NULL	NULL	NULL
Dr06715	GO:0016023|GO:0005886	NULL	ankyrin repeat-containing protein at2g01680-like	IPR027001|IPR027002|IPR002110|IPR020683|IPR026961	Caskin/Ankyrin repeat-containing protein|Ankyrin repeat-containing protein At2g01680|Ankyrin repeat|Ankyrin repeat-containing domain|PGG domain	GO:0005515	NULL	NULL
Dr21075	NULL	NULL	NULL	NULL	NULL	NULL	NULL	NULL
Dr21046	NULL	NULL	NULL	IPR011047|IPR011333|IPR027295	Quinonprotein alcohol dehydrogenase-like superfamily|BTB/POZ fold|Quinonprotein alcohol dehydrogenase-like domain	NULL	NULL	NULL
Dr21052	GO:0016568|GO:0004386|GO:0003677|GO:0005524|GO:0016740|GO:0005634|GO:0005739	NULL	chromatin remodelling complex atpase chain isw-	IPR000330|IPR001650|IPR027417|IPR014001|IPR010003	SNF2-related|Helicase, C-terminal|P-loop containing nucleoside triphosphate hydrolase|Helicase, superfamily 1/2, ATP-binding domain|HARP domain	GO:0003677|GO:0005524|GO:0003676|GO:0004386|GO:0005634|GO:0016568	NULL	NULL
Dr21058	GO:0000228|GO:0050794|GO:0006351|GO:0006338	NULL	chromatin structure-remodeling complex protein bsh	IPR006939	SNF5/SMARCB1/INI1	GO:0000228|GO:0006338	NULL	NULL
Dr21059	GO:0009941|GO:0004729|GO:0006782|GO:0015995|GO:0055114	EC:1.3.3.4	protoporphyrinogen oxidase	IPR002937|IPR003311|IPR027418|IPR004572|IPR011525	Amine oxidase|AUX/IAA protein|Protoporphyrinogen oxidase, C-terminal domain|Protoporphyrinogen oxidase|Aux/IAA-ARF-dimerisation	GO:0016491|GO:0055114|GO:0005634|GO:0006355|GO:0004729|GO:0006779|GO:0046983	EC:1.3.3.4	KEGG: 00860+1.3.3.4|MetaCyc: PWY-5531|MetaCyc: PWY-7159|UniPathway: UPA00251
Dr21093	GO:0005488|GO:0034968|GO:0018024|GO:0005634|GO:0006554	EC:2.1.1.43	histone h3 methyltransferase subunit set1	IPR001214|IPR003169	SET domain|GYF	GO:0005515	NULL	NULL
Dr21141	GO:0005739	NULL	thiol-disulfide oxudoreductase dcc	IPR007263	Putative thiol-disulphide oxidoreductase DCC	NULL	NULL	NULL
Dr06786	GO:0010027|GO:0010228|GO:0031969|GO:0005525	NULL	fzo-like protein	IPR001401|IPR027417	Dynamin, GTPase domain|P-loop containing nucleoside triphosphate hydrolase	GO:0003924|GO:0005525	NULL	NULL
Dr06812	GO:0009536	NULL	soss complex subunit b1	IPR012340	Nucleic acid-binding, OB-fold	NULL	NULL	NULL
Dr06802	GO:0004553|GO:0009536|GO:0005975	EC:3.2.1.0	isoamylase 2	IPR015902|IPR006047|IPR004193|IPR017853|IPR014756|IPR013783|IPR013780|IPR013781|IPR006589	Glycoside hydrolase, family 13|Glycosyl hydrolase, family 13, catalytic domain|Glycoside hydrolase, family 13, N-terminal|Glycoside hydrolase, superfamily|Immunoglobulin E-set|Immunoglobulin-like fold|Glycosyl hydrolase, family 13, all-beta|Glycoside hydrolase, catalytic domain|Glycosyl hydrolase, family 13, subfamily, catalytic domain	GO:0003824|GO:0005975|GO:0043169|GO:0004553	NULL	NULL
Dr00222	NULL	NULL	NULL	NULL	NULL	NULL	NULL	NULL
Dr00260	GO:0005739	NULL	pentatricopeptide repeat-containing protein	IPR002885|IPR011990	Pentatricopeptide repeat|Tetratricopeptide-like helical	GO:0005515	NULL	NULL
Dr21319	GO:0003677|GO:0016023|GO:0003723|GO:0016070	NULL	nucleolar mif4g domain-containing protein 1-like	IPR003891|IPR003890|IPR016024|IPR016021	Initiation factor eIF-4 gamma, MA3|MIF4G-like, type 3|Armadillo-type fold|MIF4-like, type 1/2/3	GO:0003723|GO:0005515|GO:0005488	NULL	NULL
Dr06914	GO:0016020|GO:0008375|GO:0005739	NULL	bc10 protein	IPR003406	Glycosyl transferase, family 14	GO:0008375|GO:0016020	NULL	NULL
Dr07015	GO:0006098|GO:0046872|GO:0042732|GO:0009045|GO:0016023|GO:0005773|GO:0005783|GO:0005886|GO:0006000|GO:0006013	EC:5.3.1.5	xylose isomerase	IPR013022|IPR001998|IPR013452	Xylose isomerase-like, TIM barrel domain|Xylose isomerase|Xylose isomerase, bacterial-type	GO:0005975|GO:0009045	EC:5.3.1.5	KEGG: 00040+5.3.1.5|KEGG: 00051+5.3.1.5
Dr21506	GO:0005739	NULL	pentatricopeptide repeat-containing protein	IPR002885|IPR011990	Pentatricopeptide repeat|Tetratricopeptide-like helical	GO:0005515	NULL	NULL
Dr21507	GO:0043231|GO:0044444	NULL	galactosyltransferase family protein	IPR002659	Glycosyl transferase, family 31	GO:0006486|GO:0008378|GO:0016020	NULL	UniPathway: UPA00378
Dr07095	GO:0016787	NULL	isoaspartyl peptidase l-asparaginase 4 subunit beta	IPR000246|IPR025558|IPR025836	Peptidase T2, asparaginase 2|Domain of unknown function DUF4283|Zinc knuckle CX2CX4HX4C	GO:0016787	NULL	NULL
Dr21682	GO:0004527|GO:1901363|GO:0008152|GO:0097159|GO:0009536	NULL	small rna degrading nuclease 5-like	IPR020946|IPR013520|IPR020905|IPR012337|IPR017850|IPR017849|IPR013027|IPR000103|IPR006055	Flavin monooxygenase-like|Exonuclease, RNase T/DNA polymerase III|NAD(P)H-quinone oxidoreductase subunit O|FAD-dependent pyridine nucleotide-disulphide oxidoreductase|Pyridine nucleotide-disulphide oxidoreductase, class-II|Ribonuclease H-like domain|Alkaline-phosphatase-like, core domain|Alkaline phosphatase-like, alpha/beta/alpha|Exonuclease	GO:0004499|GO:0050660|GO:0050661|GO:0055114|GO:0005886|GO:0016655|GO:0003676|GO:0003824|GO:0008152|GO:0016491|GO:0004527	EC:1.6.5.-	KEGG: 00624+1.6.5.-
Dr21693	GO:0009536	NULL	pentatricopeptide repeat-containing protein	IPR002885|IPR011990	Pentatricopeptide repeat|Tetratricopeptide-like helical	GO:0005515	NULL	NULL
Dr07198	GO:0003964|GO:0006278|GO:0003723|GO:0009536|GO:0005739	EC:2.7.7.49	pentatricopeptide repeat-containing protein	IPR002885|IPR011990	Pentatricopeptide repeat|Tetratricopeptide-like helical	GO:0005515	NULL	NULL
Dr21719	NULL	NULL	NULL	NULL	NULL	NULL	NULL	NULL
Dr21842	NULL	NULL	NULL	IPR027237|IPR001202|IPR002713	Pre-mRNA-processing protein PRP40|WW domain|FF domain	GO:0005515	NULL	NULL
Dr07288	GO:0005739|GO:0003887|GO:0006261|GO:0003677|GO:0008622	EC:2.7.7.7	dna polymerase epsilon subunit 2-like	IPR007185|IPR024639|IPR016266	DNA polymerase alpha/epsilon, subunit B|DNA polymerase epsilon subunit B, N-terminal|DNA polymerase epsilon, subunit B	GO:0003677|GO:0003887|GO:0006260|GO:0005634|GO:0006261	EC:2.7.7.7	Reactome: REACT_152|Reactome: REACT_22172|Reactome: REACT_383|KEGG: 00230+2.7.7.7|KEGG: 00240+2.7.7.7
Dr07322	GO:0009536	NULL	pentatricopeptide repeat-containing protein	IPR002885|IPR011990	Pentatricopeptide repeat|Tetratricopeptide-like helical	GO:0005515	NULL	NULL
Dr07339	NULL	NULL	NULL	IPR000408|IPR009091	Regulator of chromosome condensation, RCC1|Regulator of chromosome condensation 1/beta-lactamase-inhibitor protein II	NULL	NULL	NULL
Dr07350	NULL	NULL	NULL	IPR001461|IPR021109|IPR001969	Aspartic peptidase|Aspartic peptidase domain|Aspartic peptidase, active site	GO:0004190|GO:0006508	NULL	NULL
Dr21898	NULL	NULL	NULL	NULL	NULL	NULL	NULL	NULL
Dr21963	GO:0009536	NULL	pentatricopeptide repeat-containing protein	IPR002885|IPR011990	Pentatricopeptide repeat|Tetratricopeptide-like helical	GO:0005515	NULL	NULL
Dr21995	GO:0009987|GO:0009536	NULL	protein	IPR007434|IPR016181|IPR016040	Protein of unknown function DUF482|Acyl-CoA N-acyltransferase|NAD(P)-binding domain	NULL	NULL	NULL
Dr07453	GO:0044434	NULL	uncharacterized protein chloroplastic-like	NULL	NULL	NULL	NULL	NULL
Dr07569	GO:0050896|GO:0044763|GO:0016020	NULL	g protein-coupled receptor	IPR022340|IPR022343	G protein-coupled receptor GCR1 putative|GCR1-cAMP receptor	NULL	NULL	NULL
Dr07515	NULL	NULL	NULL	IPR002885|IPR011990	Pentatricopeptide repeat|Tetratricopeptide-like helical	GO:0005515	NULL	NULL
Dr07524	GO:0016020|GO:0044699	NULL	quinolone resistance protein nora	IPR011701|IPR016196|IPR020846	Major facilitator superfamily|Major facilitator superfamily domain, general substrate transporter|Major facilitator superfamily domain	GO:0016021|GO:0055085	NULL	NULL
Dr07631	GO:0003743|GO:0016070|GO:0016020|GO:0005739|GO:0005840|GO:0006446	NULL	basic leucine zipper and w2 domain-containing protein 2-like	IPR003307|IPR016024|IPR016021	W2 domain|Armadillo-type fold|MIF4-like, type 1/2/3	GO:0005515|GO:0005488	NULL	NULL
Dr07676	NULL	NULL	NULL	IPR002885|IPR011990	Pentatricopeptide repeat|Tetratricopeptide-like helical	GO:0005515	NULL	NULL
Dr22108	GO:0006810|GO:0044763|GO:0044444|GO:0016020	NULL	syntaxin-related protein knolle	IPR006011|IPR000727|IPR010989|IPR006012	Syntaxin, N-terminal domain|Target SNARE coiled-coil domain|t-SNARE|Syntaxin/epimorphin, conserved site	GO:0016020|GO:0005515|GO:0016192|GO:0005484|GO:0006886	NULL	Reactome: REACT_11184
Dr22097	GO:0009507	NULL	protein	IPR021659	Protein of unknown function DUF3252	NULL	NULL	NULL
Dr07763	GO:0005737|GO:0008380|GO:0008026|GO:0003723|GO:0006397|GO:0005524|GO:0005634	NULL	dead-box atp-dependent rna helicase	IPR011545|IPR001650|IPR027417|IPR014001|IPR014014|IPR000629	DNA/RNA helicase, DEAD/DEAH box type, N-terminal|Helicase, C-terminal|P-loop containing nucleoside triphosphate hydrolase|Helicase, superfamily 1/2, ATP-binding domain|RNA helicase, DEAD-box type, Q motif|RNA helicase, ATP-dependent, DEAD-box, conserved site	GO:0003676|GO:0005524|GO:0008026|GO:0004386	NULL	NULL
Dr07812	GO:0016301|GO:0000166	NULL	protein	IPR000719|IPR011009|IPR013320|IPR002290|IPR017441|IPR008271	Protein kinase domain|Protein kinase-like domain|Concanavalin A-like lectin/glucanase, subgroup|Serine/threonine- / dual specificity protein kinase, catalytic domain|Protein kinase, ATP binding site|Serine/threonine-protein kinase, active site	GO:0004672|GO:0005524|GO:0006468|GO:0016772|GO:0004674	NULL	NULL
Dr07879	GO:0005739	NULL	thymocyte nuclear protein 1-like	IPR002740|IPR015947	EVE domain|PUA-like domain	NULL	NULL	NULL
Dr07896	GO:0005739	NULL	lyr family of fe s cluster biogenesis protein	IPR008011	Complex 1 LYR protein	NULL	NULL	NULL
Dr22341	GO:0016023	NULL	pan domain-containing protein	IPR000858|IPR001480|IPR013227|IPR003609	S-locus glycoprotein|Bulb-type lectin domain|PAN-2 domain|Apple-like	GO:0048544	NULL	NULL
Dr08014	GO:0005739	NULL	pentatricopeptide repeat-containing protein	IPR002885	Pentatricopeptide repeat	NULL	NULL	NULL
Dr07988	GO:0009507	NULL	pentatricopeptide repeat-containing protein	IPR002885|IPR011990|IPR002625	Pentatricopeptide repeat|Tetratricopeptide-like helical|Smr protein/MutS2 C-terminal	GO:0005515	NULL	NULL
Dr07998	GO:0009536	NULL	pentatricopeptide repeat-containing protein mitochondrial-like	IPR002885|IPR011990	Pentatricopeptide repeat|Tetratricopeptide-like helical	GO:0005515	NULL	NULL
Dr07915	GO:0016787	NULL	feruloyl esterase a	IPR002921	Lipase, class 3	GO:0004806|GO:0006629	NULL	Reactome: REACT_14797|Reactome: REACT_604
Dr07911	GO:0016787|GO:0044464	NULL	aspartyl protease	IPR001461|IPR021109	Aspartic peptidase|Aspartic peptidase domain	GO:0004190|GO:0006508	NULL	NULL
Dr08039	GO:0009505|GO:0004557|GO:0046477|GO:0009311|GO:0005739|GO:0016139|GO:0001575|GO:0006012|GO:0046486	EC:3.2.1.22	alpha-galactosidase alpha-n-	IPR017853|IPR013785	Glycoside hydrolase, superfamily|Aldolase-type TIM barrel	GO:0003824	NULL	NULL
Dr00354	GO:0005886|GO:0055085|GO:0008643|GO:0032440|GO:0016021|GO:0005358|GO:0055114|GO:0006812	EC:1.3.1.74	hexose transporter	IPR005828|IPR016196|IPR003663|IPR020846|IPR005829	General substrate transporter|Sugar/inositol transporter|Major facilitator superfamily domain, general substrate transporter|Major facilitator superfamily domain|Sugar transporter, conserved site	GO:0016021|GO:0022857|GO:0055085|GO:0016020|GO:0022891|GO:0005215|GO:0006810	NULL	Reactome: REACT_15518
Dr00384	NULL	NULL	NULL	IPR001214	SET domain	GO:0005515	NULL	NULL
Dr00458	GO:0016020|GO:0009507	NULL	probable plastid-lipid-associated protein chloroplastic-like	IPR006843	Plastid lipid-associated protein/fibrillin conserved domain	GO:0005198|GO:0009507	NULL	NULL
Dr00463	GO:0003887|GO:0006260|GO:0003677|GO:0005634|GO:0042575	EC:2.7.7.7	dna polymerase delta small subunit	IPR024826|IPR007185	DNA polymerase delta/II small subunit family|DNA polymerase alpha/epsilon, subunit B	GO:0003677|GO:0003887|GO:0006260	EC:2.7.7.7	KEGG: 00230+2.7.7.7|KEGG: 00240+2.7.7.7|Reactome: REACT_152|Reactome: REACT_22172|Reactome: REACT_383
Dr00472	NULL	NULL	NULL	IPR027074|IPR022712	Integrator complex subunit 9|Beta-Casp domain	GO:0016180|GO:0032039	NULL	NULL
Dr00481	NULL	NULL	NULL	IPR002885	Pentatricopeptide repeat	NULL	NULL	NULL
Dr00483	GO:0016020|GO:0005524|GO:0004386|GO:0003677|GO:0016740	NULL	snf2 family dna-dependent atpase	IPR000330|IPR001650|IPR027417|IPR014001	SNF2-related|Helicase, C-terminal|P-loop containing nucleoside triphosphate hydrolase|Helicase, superfamily 1/2, ATP-binding domain	GO:0003677|GO:0005524|GO:0003676|GO:0004386	NULL	NULL
Dr00490	NULL	NULL	NULL	IPR013180|IPR016024|IPR011989	Beta-catenin-like protein 1, N-terminal|Armadillo-type fold|Armadillo-like helical	GO:0005488	NULL	NULL
Dr00491	GO:0016020	NULL	uncharacterized protein	IPR019049	Nucleoporin protein Ndc1-Nup	NULL	NULL	NULL
Dr00449	GO:0008793|GO:0010035|GO:0044763|GO:0004069|GO:0008509|GO:0048878|GO:0006820|GO:0019899|GO:1901700|GO:0016847|GO:0030170|GO:0016020|GO:0010033|GO:0000162|GO:0006571|GO:0009094|GO:0009821|GO:0006107|GO:0006522|GO:0006525|GO:0006531|GO:0006534|GO:0006536|GO:0006560|GO:0015976|GO:0006519	EC:2.6.1.57|EC:2.6.1.1|EC:4.4.1.14	1-aminocyclopropane-1-carboxylate synthase	IPR002110|IPR004839|IPR004695|IPR020683|IPR015424|IPR015421|IPR015422|IPR007087|IPR004838	Ankyrin repeat|Aminotransferase, class I/classII|Voltage-dependent anion channel|Ankyrin repeat-containing domain|Pyridoxal phosphate-dependent transferase|Pyridoxal phosphate-dependent transferase, major region, subdomain 1|Pyridoxal phosphate-dependent transferase, major region, subdomain 2|Zinc finger, C2H2|Aminotransferases, class-I, pyridoxal-phosphate-binding site	GO:0005515|GO:0009058|GO:0030170|GO:0016021|GO:0055085|GO:0003824|GO:0046872	NULL	Reactome: REACT_13
Dr00531	GO:0003700|GO:0043565|GO:0010089|GO:0006355|GO:0005667|GO:0045449	NULL	homeobox protein knotted-1-like protein	IPR005539|IPR005540|IPR005541|IPR008422|IPR009057|IPR001356	ELK|KNOX1|KNOX2|Homeobox KN domain|Homeodomain-like|Homeobox domain	GO:0003677|GO:0005634|GO:0006355|GO:0003700|GO:0043565	NULL	NULL
Dr08116	GO:0003779|GO:0030036	NULL	profilin family protein	IPR005455	Profilin	GO:0003779|GO:0030036	NULL	NULL
Dr22659	GO:0016020|GO:0006886|GO:0005801	NULL	sec34-like protein	IPR007265|IPR016159	Conserved oligomeric Golgi complex, subunit 3|Cullin repeat-like-containing domain	GO:0005801|GO:0006886|GO:0016020	NULL	NULL
Dr08218	GO:0009825|GO:0005885|GO:0010090|GO:0034314|GO:0005524|GO:0003779|GO:0005737	NULL	actin related protein 2	IPR004000|IPR027306	Actin-related protein|Actin-related protein 2 (Arp2)	GO:0005524|GO:0005856|GO:0005885|GO:0030833|GO:0034314	NULL	NULL
Dr08304	GO:0046872|GO:0016023|GO:0016787|GO:0005576|GO:0008152	NULL	germin-like protein	IPR006045|IPR011051|IPR014710|IPR001929|IPR019780	Cupin 1|Germin|RmlC-like cupin domain|RmlC-like jelly roll fold|Germin, manganese binding site	GO:0045735|GO:0030145	NULL	NULL
Dr08305	NULL	NULL	NULL	NULL	NULL	NULL	NULL	NULL
Dr08269	GO:0016020|GO:0005739	NULL	pentatricopeptide repeat-containing protein mitochondrial-like	IPR002885|IPR011990	Pentatricopeptide repeat|Tetratricopeptide-like helical	GO:0005515	NULL	NULL
Dr08271	NULL	NULL	NULL	IPR026570	Coiled-coil domain-containing protein 86	NULL	NULL	NULL
Dr08437	GO:0050897|GO:0006552|GO:0005524|GO:0004075|GO:0005759|GO:0004485|GO:0022626|GO:0006633|GO:0009343|GO:0006550|GO:0006574	EC:6.3.4.14|EC:6.4.1.4	methylcrotonoyl- carboxylase subunit alpha	IPR005481|IPR000089|IPR005482|IPR005479|IPR011053|IPR011054|IPR016185|IPR013815|IPR013816|IPR011761|IPR011764|IPR001882	Carbamoyl-phosphate synthase, large subunit, N-terminal|Biotin/lipoyl attachment|Biotin carboxylase, C-terminal|Carbamoyl-phosphate synthetase large subunit-like, ATP-binding domain|Single hybrid motif|Rudiment single hybrid motif|Pre-ATP-grasp domain|ATP-grasp fold, subdomain 1|ATP-grasp fold, subdomain 2|ATP-grasp fold|Biotin carboxylation domain|Biotin-binding site	GO:0003824|GO:0008152|GO:0016874|GO:0005524|GO:0046872|GO:0004075	NULL	NULL
Dr08506	GO:0016020	NULL	glycosylphosphatidylinositol transamidase	IPR007246|IPR017063	Gaa1-like, GPI transamidase component|Glycosylphosphatidylinositol:protein transamidase complex, GAA1 component	GO:0016021|GO:0042765	NULL	UniPathway: UPA00196
Dr08588	GO:0016020	NULL	protein	IPR002528	Multi antimicrobial extrusion protein	GO:0006855|GO:0015238|GO:0015297|GO:0016020|GO:0055085	NULL	Reactome: REACT_15518|Reactome: REACT_20633
Dr08677	GO:0043232|GO:0006974|GO:0031981	NULL	hus1 protein	IPR007150	Checkpoint protein Hus1/Mec3	GO:0000077|GO:0006281|GO:0030896	NULL	NULL
Dr08713	NULL	NULL	NULL	IPR002885|IPR011990	Pentatricopeptide repeat|Tetratricopeptide-like helical	GO:0005515	NULL	NULL
Dr08809	GO:0090305|GO:0003676|GO:0004518	NULL	protein dom3z-like protein	IPR001806|IPR013961|IPR027417|IPR003578	Small GTPase superfamily|RAI1-like|P-loop containing nucleoside triphosphate hydrolase|Small GTPase superfamily, Rho type	GO:0005525|GO:0007264|GO:0005622	EC:3.6.1.-	KEGG: 00230+3.6.1.-|KEGG: 00790+3.6.1.-|Reactome: REACT_11044
Dr08829	GO:0005488	NULL	homolog subfamily c member	IPR009057|IPR001005|IPR017877|IPR017884	Homeodomain-like|SANT/Myb domain|Myb-like domain|SANT domain	GO:0003677|GO:0003682	NULL	NULL
Dr08897	GO:0009536	NULL	protein	IPR000008|IPR000225|IPR016024|IPR021109|IPR011989|IPR001969	C2 domain|Armadillo|Armadillo-type fold|Aspartic peptidase domain|Armadillo-like helical|Aspartic peptidase, active site	GO:0005515|GO:0005488|GO:0004190|GO:0006508	NULL	NULL
Dr08927	GO:0048509|GO:0005886|GO:0009908	NULL	leucine rich repeat receptor like protein clavata2	IPR001611|IPR025875|IPR003591	Leucine-rich repeat|Leucine rich repeat 4|Leucine-rich repeat, typical subtype	GO:0005515	NULL	NULL
Dr08871	NULL	NULL	NULL	IPR011990|IPR019734|IPR013026	Tetratricopeptide-like helical|Tetratricopeptide repeat|Tetratricopeptide repeat-containing domain	GO:0005515	NULL	NULL
Dr08901	GO:0003887|GO:0006260|GO:0003677|GO:0000166|GO:0042575	EC:2.7.7.7	dna polymerase delta catalytic subunit	IPR006134|IPR006133|IPR012337|IPR023211|IPR006172|IPR004578|IPR017964	DNA-directed DNA polymerase, family B, multifunctional domain|DNA-directed DNA polymerase, family B, exonuclease domain|DNA-directed DNA polymerase, family B|Ribonuclease H-like domain|DNA polymerase, palm domain|DNA-directed DNA polymerase, family B, pol2|DNA-directed DNA polymerase, family B, conserved site	GO:0000166|GO:0003677|GO:0003887|GO:0006260|GO:0003676|GO:0006139	EC:2.7.7.7	KEGG: 00230+2.7.7.7|KEGG: 00240+2.7.7.7
Dr08976	NULL	NULL	NULL	IPR004843	Phosphoesterase domain	GO:0016787	NULL	NULL
Dr09119	GO:0009536	NULL	pentatricopeptide repeat-containing protein	IPR002885|IPR011990	Pentatricopeptide repeat|Tetratricopeptide-like helical	GO:0005515	NULL	NULL
Dr09107	NULL	NULL	NULL	IPR002885|IPR011990	Pentatricopeptide repeat|Tetratricopeptide-like helical	GO:0005515	NULL	NULL
Dr09113	NULL	NULL	NULL	IPR002885	Pentatricopeptide repeat	NULL	NULL	NULL
Dr09230	GO:0005618|GO:0046872|GO:0009252|GO:0005524|GO:0009507|GO:0008716|GO:0046436	EC:6.3.2.4	d-alanine--d-alanine ligase family protein	IPR005905|IPR011127|IPR011095|IPR016185|IPR013816|IPR011761|IPR000291	D-alanine--D-alanine ligase|D-alanine--D-alanine ligase, N-terminal domain|D-alanine--D-alanine ligase, C-terminal|Pre-ATP-grasp domain|ATP-grasp fold, subdomain 2|ATP-grasp fold|D-alanine--D-alanine ligase/VANA/B/C, conserved site	GO:0005737|GO:0008716|GO:0009252|GO:0005524|GO:0046872	EC:6.3.2.4	KEGG: 00473+6.3.2.4|KEGG: 00550+6.3.2.4|MetaCyc: PWY-6386|MetaCyc: PWY-6387|UniPathway: UPA00219
Dr09231	GO:0008270	NULL	e3 ubiquitin-protein ligase listerin-like	IPR001841|IPR016024|IPR011989|IPR013083|IPR011016	Zinc finger, RING-type|Armadillo-type fold|Armadillo-like helical|Zinc finger, RING/FYVE/PHD-type|Zinc finger, RING-CH-type	GO:0005515|GO:0008270|GO:0005488	EC:6.3.2.-	KEGG: 00300+6.3.2.-|KEGG: 00380+6.3.2.-|UniPathway: UPA00143
Dr09284	NULL	NULL	NULL	NULL	NULL	NULL	NULL	NULL
Dr09279	NULL	NULL	NULL	IPR006906|IPR007725	Timeless protein|Timeless C-terminal	NULL	NULL	NULL
Dr09271	GO:0009536	NULL	proline-rich cell wall	IPR009060	UBA-like	GO:0005515	NULL	NULL
Dr09364	GO:0005739	NULL	pentatricopeptide repeat-containing protein mitochondrial-like	IPR002885	Pentatricopeptide repeat	NULL	NULL	NULL
Dr09509	GO:0016757|GO:0016491|GO:0003676|GO:0008152	NULL	poly	IPR001357|IPR012317|IPR004102|IPR008893|IPR012982	BRCT domain|Poly(ADP-ribose) polymerase, catalytic domain|Poly(ADP-ribose) polymerase, regulatory domain|WGR domain|PADR1	GO:0003950|GO:0006471|GO:0005634	NULL	NULL
Dr09374	NULL	NULL	NULL	IPR000408|IPR009091	Regulator of chromosome condensation, RCC1|Regulator of chromosome condensation 1/beta-lactamase-inhibitor protein II	NULL	NULL	NULL
Dr09382	NULL	NULL	NULL	NULL	NULL	NULL	NULL	NULL
Dr09451	NULL	NULL	NULL	IPR002885|IPR011990	Pentatricopeptide repeat|Tetratricopeptide-like helical	GO:0005515	NULL	NULL
Dr00692	GO:0010218|GO:0010541|GO:0016023|GO:0043190|GO:0009958|GO:0009624|GO:0016021|GO:0043481|GO:0010329|GO:0009640|GO:0010540|GO:0008361|GO:0048527|GO:0009637|GO:0010315|GO:0008559|GO:0006200|GO:0005886|GO:0005524|GO:0048443|GO:0006855	EC:3.6.3.44	abc transporter b family member 19-like	IPR003439|IPR001140|IPR027417|IPR011527|IPR003593|IPR017871	ABC transporter-like|ABC transporter, transmembrane domain|P-loop containing nucleoside triphosphate hydrolase|ABC transporter type 1, transmembrane domain|AAA+ ATPase domain|ABC transporter, conserved site	GO:0005524|GO:0016887|GO:0006810|GO:0016021|GO:0042626|GO:0055085|GO:0000166|GO:0017111	NULL	NULL
Dr00741	GO:0048731|GO:0097159|GO:0016491|GO:0016570|GO:1901363	NULL	lysine-specific histone demethylase 1 homolog 1-like	IPR002937|IPR007526|IPR009057|IPR011991|IPR016040|IPR001613	Amine oxidase|SWIRM domain|Flavin amine oxidase|Homeodomain-like|Winged helix-turn-helix DNA-binding domain|NAD(P)-binding domain	GO:0016491|GO:0055114|GO:0005515|GO:0003677	NULL	NULL
Dr00711	GO:0006364|GO:0009536	NULL	rnase l inhibitor protein	IPR022968|IPR007177	Ribosome biogenesis protein|Domain of unknown function DUF367	NULL	NULL	NULL
Dr00796	GO:0005739|GO:0052689	EC:3.1.1.0	probable carboxylesterase 17-like	IPR013094|IPR002168	Alpha/beta hydrolase fold-3|Lipase, GDXG, active site	GO:0008152|GO:0016787	NULL	NULL
Dr00906	NULL	NULL	NULL	IPR019547	Kua-ubiquitin conjugating enzyme hybrid, localisation	NULL	NULL	NULL
Dr09625	GO:0016049|GO:1901700|GO:0016043|GO:0044464|GO:0010033	NULL	sdl-1 protein	NULL	NULL	NULL	NULL	NULL
Dr09735	GO:0008453|GO:0030170|GO:0046686|GO:0005886|GO:0008270|GO:0005739|GO:0006522|GO:0006531|GO:0006544|GO:0006563|GO:0006566	EC:2.6.1.44	alanine--glyoxylate aminotransferase 2 homolog mitochondrial-like	IPR005814|IPR015424|IPR015421|IPR015422	Aminotransferase class-III|Pyridoxal phosphate-dependent transferase|Pyridoxal phosphate-dependent transferase, major region, subdomain 1|Pyridoxal phosphate-dependent transferase, major region, subdomain 2	GO:0008483|GO:0030170|GO:0003824	NULL	NULL
Dr09767	GO:0005739	NULL	zinc finger (ran-binding) domain-containing protein	IPR000086|IPR001876|IPR015797|IPR020084	NUDIX hydrolase domain|Zinc finger, RanBP2-type|NUDIX hydrolase domain-like|NUDIX hydrolase, conserved site	GO:0016787|GO:0008270	NULL	NULL
Dr09793	NULL	NULL	NULL	NULL	NULL	NULL	NULL	NULL
Dr09799	GO:0005739	NULL	ubiquitin carboxyl-terminal hydrolase-like protein	IPR021099	Plant organelle RNA recognition domain	NULL	NULL	NULL
Dr09718	GO:0005739	NULL	pentatricopeptide repeat-containing protein	IPR002885|IPR011990	Pentatricopeptide repeat|Tetratricopeptide-like helical	GO:0005515	NULL	NULL
Dr09802	NULL	NULL	NULL	IPR013598|IPR016024	Exportin-1/Importin-beta-like|Armadillo-type fold	GO:0005488	NULL	NULL
Dr09820	GO:0018208|GO:0044436|GO:0016853|GO:0009507|GO:0016020	NULL	protein	IPR023566|IPR001179	Peptidyl-prolyl cis-trans isomerase, FKBP-type|Peptidyl-prolyl cis-trans isomerase, FKBP-type, domain	GO:0006457	NULL	NULL
Dr09985	GO:0005739|GO:0009507	NULL	sec14 cytosolic factor-like	IPR001251|IPR011074	CRAL-TRIO domain|CRAL/TRIO, N-terminal domain	NULL	NULL	NULL
Dr09987	NULL	NULL	NULL	IPR002885|IPR011990	Pentatricopeptide repeat|Tetratricopeptide-like helical	GO:0005515	NULL	NULL
Dr10047	GO:0005488|GO:0016787|GO:0016070	NULL	metal-dependent phosphohydrolase hd domain-containing protein	IPR006674|IPR003607	HD domain|HD/PDEase domain	GO:0008081|GO:0046872|GO:0003824	NULL	NULL
Dr09917	GO:0003746|GO:0006184|GO:0003924|GO:0005525|GO:0005840|GO:0006448	NULL	elongation factor ef-2	IPR000795|IPR000640|IPR004161|IPR009022|IPR009000|IPR027417|IPR020568|IPR014721	Elongation factor, GTP-binding domain|Translation elongation factor EFG, V domain|Translation elongation factor EFTu/EF1A, domain 2|Elongation factor G, III-V domain|Translation protein, beta-barrel domain|P-loop containing nucleoside triphosphate hydrolase|Ribosomal protein S5 domain 2-type fold|Ribosomal protein S5 domain 2-type fold, subgroup	GO:0003924|GO:0005525	NULL	NULL
Dr09926	GO:0016192|GO:0006886|GO:0030117	NULL	ap-4 complex subunit epsilon-like	IPR017109|IPR000719|IPR002553|IPR016024|IPR011009|IPR011989|IPR002290|IPR008271	Adaptor protein complex AP-4, epsilon subunit|Protein kinase domain|Clathrin/coatomer adaptor, adaptin-like, N-terminal|Armadillo-type fold|Protein kinase-like domain|Armadillo-like helical|Serine/threonine- / dual specificity protein kinase, catalytic domain|Serine/threonine-protein kinase, active site	GO:0004672|GO:0005524|GO:0006468|GO:0006886|GO:0016192|GO:0030117|GO:0005488|GO:0016772|GO:0004674	NULL	NULL
Dr09965	GO:0004185|GO:0006508	EC:3.4.16.0	serine carboxypeptidase-like protein	IPR001563|IPR018202	Peptidase S10, serine carboxypeptidase|Peptidase S10, serine carboxypeptidase, active site	GO:0004185|GO:0006508	NULL	NULL
Dr10107	GO:0009536	NULL	uncharacterized protein	IPR007572	Uncharacterised protein family Ycf20	NULL	NULL	NULL
Dr10123	NULL	NULL	NULL	IPR015797	NUDIX hydrolase domain-like	GO:0016787	NULL	NULL
Dr10237	GO:0006306|GO:0003677|GO:0008168	EC:2.1.1.0	dna methyltransferase-2	IPR001525	C-5 cytosine methyltransferase	GO:0003677|GO:0006306|GO:0008168	EC:2.1.1.37	KEGG: 00270+2.1.1.37
Dr10202	NULL	NULL	NULL	NULL	NULL	NULL	NULL	NULL
Dr10261	GO:0005739	NULL	pentatricopeptide repeat-containing protein mitochondrial-like	IPR002885|IPR011990	Pentatricopeptide repeat|Tetratricopeptide-like helical	GO:0005515	NULL	NULL
Dr10264	NULL	NULL	NULL	NULL	NULL	NULL	NULL	NULL
Dr01328	NULL	NULL	NULL	IPR002885	Pentatricopeptide repeat	NULL	NULL	NULL
Dr01389	GO:0045597|GO:0006355|GO:0010075|GO:0009965|GO:0008284|GO:0080060|GO:0043565|GO:0048263|GO:0003700|GO:0009733|GO:0010067|GO:0010072|GO:0010089|GO:0005667|GO:0045449	NULL	homeobox-leucine zipper protein athb-15-like	IPR001356|IPR002913|IPR013978|IPR009057|IPR023393	Homeobox domain|START domain|MEKHLA|Homeodomain-like|START-like domain	GO:0003700|GO:0006355|GO:0043565|GO:0008289|GO:0003677	NULL	NULL
Dr01358	GO:0005829|GO:0032550|GO:0042736|GO:0043168|GO:0006741|GO:0003951|GO:0019674|GO:0016310|GO:0032559|GO:0006769|GO:0046497	EC:2.7.1.86|EC:2.7.1.23	nadh kinase	IPR002504|IPR016064|IPR017437|IPR017438	Inorganic polyphosphate/ATP-NAD kinase, predicted|ATP-NAD kinase-like domain|ATP-NAD kinase, PpnK-type, all-beta|Inorganic polyphosphate/ATP-NAD kinase, domain 1	GO:0003951|GO:0006741|GO:0008152|GO:0019674	EC:2.7.1.23	KEGG: 00760+2.7.1.23|MetaCyc: PWY-5083|MetaCyc: PWY-7268|MetaCyc: PWY-7269
Dr01464	NULL	NULL	NULL	IPR021025	Fanconi Anaemia group E protein, C-terminal	NULL	NULL	NULL
Dr01472	GO:0050794	NULL	protein twin lov 1	IPR003657|IPR000014|IPR001610	DNA-binding WRKY|PAS domain|PAC motif	GO:0003700|GO:0006355|GO:0043565|GO:0004871|GO:0007165	NULL	NULL
Dr01499	NULL	NULL	NULL	NULL	NULL	NULL	NULL	NULL
Dr01129	GO:0005739	NULL	pentatricopeptide repeat-containing	IPR002885|IPR020683	Pentatricopeptide repeat|Ankyrin repeat-containing domain	NULL	NULL	NULL
Dr01199	GO:0005739	NULL	ubiquitin carboxyl-terminal hydrolase-like protein	IPR021099	Plant organelle RNA recognition domain	NULL	NULL	NULL
Dr01247	NULL	NULL	NULL	IPR002885|IPR011990	Pentatricopeptide repeat|Tetratricopeptide-like helical	GO:0005515	NULL	NULL
Dr10556	GO:0000502|GO:0005618	NULL	26s proteasome non-atpase regulatory subunit 10	IPR002110|IPR007493|IPR020683	Ankyrin repeat|Protein of unknown function DUF538|Ankyrin repeat-containing domain	GO:0005515	NULL	NULL
Dr10589	NULL	NULL	NULL	IPR002885|IPR011990	Pentatricopeptide repeat|Tetratricopeptide-like helical	GO:0005515	NULL	NULL
Dr10623	GO:0009536	NULL	pentatricopeptide repeat-containing protein	IPR002885|IPR016024|IPR011989|IPR011990|IPR000225	Pentatricopeptide repeat|Armadillo-type fold|Armadillo-like helical|Tetratricopeptide-like helical|Armadillo	GO:0005488|GO:0005515	NULL	NULL
Dr10662	GO:0051501|GO:0046872|GO:0004337|GO:0033384|GO:0009513|GO:0016117|GO:0004311|GO:0004161|GO:0033386|GO:0009507|GO:0016020|GO:0005783|GO:0005739|GO:0045337|GO:0006694	EC:2.5.1.10|EC:2.5.1.29|EC:2.5.1.1	geranylgeranyl pyrophosphate synthase	IPR017446|IPR000092|IPR008949	Polyprenyl synthetase-related|Polyprenyl synthetase|Terpenoid synthase	GO:0008299	NULL	NULL
Dr10654	GO:0005840|GO:0003735|GO:0006412|GO:0005739|GO:0042254	NULL	ribosomal protein s21 family protein	IPR001911	Ribosomal protein S21	GO:0003735|GO:0005622|GO:0005840|GO:0006412	NULL	NULL
Dr10696	GO:0009536	NULL	pentatricopeptide repeat-containing protein	IPR002885|IPR011990	Pentatricopeptide repeat|Tetratricopeptide-like helical	GO:0005515	NULL	NULL
Dr10717	NULL	NULL	NULL	IPR002885|IPR011990	Pentatricopeptide repeat|Tetratricopeptide-like helical	GO:0005515	NULL	NULL
Dr10731	GO:0044444|GO:0043231	NULL	uncharacterized protein	IPR009688	Domain of unknown function DUF1279	NULL	NULL	NULL
Dr10790	GO:0009941|GO:0009658|GO:0045037|GO:0009528	NULL	chloroplast inner envelope protein	NULL	NULL	NULL	NULL	NULL
Dr10798	GO:0009910|GO:0045893|GO:0016020|GO:0016571	NULL	rna polymerase-associated protein ctr9 homolog	IPR001440|IPR013105|IPR011990|IPR019734|IPR013026	Tetratricopeptide TPR1|Tetratricopeptide TPR2|Tetratricopeptide-like helical|Tetratricopeptide repeat|Tetratricopeptide repeat-containing domain	GO:0005515	NULL	NULL
Dr10812	NULL	NULL	NULL	IPR003388|IPR005069	Reticulon|Nucleotide-diphospho-sugar transferase	NULL	NULL	NULL
Dr10861	NULL	NULL	NULL	NULL	NULL	NULL	NULL	NULL
Dr10902	GO:0005622|GO:0008270	NULL	dna rna-binding protein kin17	IPR019447	DNA/RNA-binding protein Kin17, conserved domain	NULL	NULL	NULL
Dr10896	GO:0016023|GO:0009505	NULL	osmotin-like protein	IPR001938	Thaumatin	NULL	NULL	NULL
Dr10982	NULL	NULL	NULL	IPR016024	Armadillo-type fold	GO:0005488	NULL	NULL
Dr10966	NULL	NULL	NULL	IPR002885|IPR011990	Pentatricopeptide repeat|Tetratricopeptide-like helical	GO:0005515	NULL	NULL
Dr10968	NULL	NULL	NULL	IPR011047|IPR015943	Quinonprotein alcohol dehydrogenase-like superfamily|WD40/YVTN repeat-like-containing domain	GO:0005515	NULL	NULL
Dr10987	GO:0009941|GO:0010224|GO:0009926|GO:0005739	NULL	upf0420 protein c16orf58 homolog	IPR006968	Vitamin B6 photo-protection and homoeostasis	NULL	NULL	NULL
Dr11111	GO:0018279|GO:0005730|GO:0016021|GO:0009505|GO:0016023|GO:0009826|GO:0009664|GO:0005773|GO:0004579|GO:0005886|GO:0008250	EC:2.4.1.119	dolichyl-diphosphooligosaccharide--protein glycosyltransferase 48 kda subunit	IPR005013	Dolichyl-diphosphooligosaccharide--protein glycosyltransferase subunit WBP1	GO:0004579|GO:0005789|GO:0018279	EC:2.4.99.18	KEGG: 00510+2.4.99.18|KEGG: 00513+2.4.99.18|UniPathway: UPA00378
Dr11148	NULL	NULL	NULL	IPR002885|IPR008889|IPR011990	Pentatricopeptide repeat|VQ|Tetratricopeptide-like helical	GO:0005515	NULL	NULL
Dr11196	GO:0016740	NULL	c2 domain-containing protein	IPR000008|IPR013583	C2 domain|Phosphoribosyltransferase C-terminal	GO:0005515	NULL	NULL
Dr11209	GO:0009536	NULL	pentatricopeptide repeat-containing protein at5g03800-like	IPR002885|IPR011990	Pentatricopeptide repeat|Tetratricopeptide-like helical	GO:0005515	NULL	NULL
Dr11315	GO:0009536|GO:0016020	NULL	pentatricopeptide repeat-containing protein	IPR002885|IPR011990	Pentatricopeptide repeat|Tetratricopeptide-like helical	GO:0005515	NULL	NULL
Dr11349	GO:0003723|GO:0006364|GO:0008026|GO:0005524|GO:0000184|GO:0005634	NULL	dead-box atp-dependent rna helicase 30-like	IPR011545|IPR001650|IPR006813|IPR027417|IPR014001|IPR014014|IPR000629	DNA/RNA helicase, DEAD/DEAH box type, N-terminal|Helicase, C-terminal|Glycosyl transferase, family 17|P-loop containing nucleoside triphosphate hydrolase|Helicase, superfamily 1/2, ATP-binding domain|RNA helicase, DEAD-box type, Q motif|RNA helicase, ATP-dependent, DEAD-box, conserved site	GO:0003676|GO:0005524|GO:0008026|GO:0004386|GO:0003830|GO:0006487|GO:0016020	EC:2.4.1.144	KEGG: 00510+2.4.1.144|UniPathway: UPA00378
Dr11575	GO:0030127|GO:0006886|GO:0006888|GO:0008270	NULL	protein transport protein sec23	IPR007123|IPR006895|IPR006896|IPR006900|IPR013094|IPR012990|IPR002035	Gelsolin domain|Zinc finger, Sec23/Sec24-type|Sec23/Sec24, trunk domain|Sec23/Sec24, helical domain|Alpha/beta hydrolase fold-3|Sec23/Sec24 beta-sandwich|von Willebrand factor, type A	GO:0006886|GO:0006888|GO:0008270|GO:0030127|GO:0008152|GO:0016787	NULL	Reactome: REACT_11123
Dr11594	GO:0044267	NULL	peptidyl-prolyl isomerase fkbp12	IPR023566|IPR001179	Peptidyl-prolyl cis-trans isomerase, FKBP-type|Peptidyl-prolyl cis-trans isomerase, FKBP-type, domain	GO:0006457	NULL	NULL
Dr11595	GO:0005310|GO:0006835|GO:0055085|GO:0006839|GO:0016021|GO:0031966	NULL	protein	IPR018108|IPR023395|IPR002067	Mitochondrial substrate/solute carrier|Mitochondrial carrier protein|Mitochondrial carrier domain	GO:0055085	NULL	NULL
Dr11583	GO:0005488	NULL	uncharacterized protein	IPR006460	Protein of unknown function DUF617, plant	NULL	NULL	NULL
Dr11601	NULL	NULL	NULL	IPR002885|IPR011990	Pentatricopeptide repeat|Tetratricopeptide-like helical	GO:0005515	NULL	NULL
Dr11685	NULL	NULL	NULL	IPR019163	THO complex, subunit 5	NULL	NULL	NULL
Dr11620	GO:0005739	NULL	pentatricopeptide repeat-containing protein at5g27460-like	IPR002885|IPR011990	Pentatricopeptide repeat|Tetratricopeptide-like helical	GO:0005515	NULL	NULL
Dr11684	GO:0005643|GO:0046907|GO:0006950|GO:0009536	NULL	protein	IPR009269	Protein of unknown function DUF926	NULL	NULL	NULL
Dr11640	GO:0043169|GO:0019156|GO:0005983|GO:0009570|GO:0009569	EC:3.2.1.68	isoamylase chloroplastic-like	IPR015902|IPR006047|IPR004193|IPR017853|IPR014756|IPR013783|IPR013780|IPR013781|IPR006589|IPR011837	Glycoside hydrolase, family 13|Glycosyl hydrolase, family 13, catalytic domain|Glycoside hydrolase, family 13, N-terminal|Glycoside hydrolase, superfamily|Immunoglobulin E-set|Immunoglobulin-like fold|Glycosyl hydrolase, family 13, all-beta|Glycoside hydrolase, catalytic domain|Glycosyl hydrolase, family 13, subfamily, catalytic domain|Glycogen debranching enzyme, GlgX type	GO:0003824|GO:0005975|GO:0043169|GO:0004553|GO:0004133|GO:0005980	EC:3.2.1.-	KEGG: 00053+3.2.1.-|KEGG: 00130+3.2.1.-|KEGG: 00531+3.2.1.-|UniPathway: UPA00165
Dr01686	NULL	NULL	NULL	IPR019258	Mediator complex, subunit Med4	GO:0001104|GO:0006357|GO:0016592	NULL	NULL
Dr01665	NULL	NULL	NULL	NULL	NULL	NULL	NULL	NULL
Dr01735	GO:0004553|GO:0016023|GO:0000272	EC:3.2.1.0	endoglucanase 5-like	IPR001701|IPR019028|IPR008928|IPR012341	Glycoside hydrolase, family 9|Carbohydrate binding domain CBM49|Six-hairpin glycosidase-like|Six-hairpin glycosidase	GO:0004553|GO:0005975|GO:0030246|GO:0003824	EC:3.2.1.4	KEGG: 00500+3.2.1.4|MetaCyc: PWY-6788|MetaCyc: PWY-6805
Dr01843	GO:0009536	NULL	vacuolar protein sorting-associated protein 54-like	IPR012501|IPR019515	Vps54-like|Vacuolar protein sorting-associated protein 54	GO:0042147	NULL	NULL
Dr01916	NULL	NULL	NULL	IPR002885|IPR011990	Pentatricopeptide repeat|Tetratricopeptide-like helical	GO:0005515	NULL	NULL
Dr01885	NULL	NULL	NULL	IPR002885|IPR011990	Pentatricopeptide repeat|Tetratricopeptide-like helical	GO:0005515	NULL	NULL
Dr01908	NULL	NULL	NULL	IPR002885|IPR011990	Pentatricopeptide repeat|Tetratricopeptide-like helical	GO:0005515	NULL	NULL
Dr01915	GO:0016023|GO:0016740|GO:0044425|GO:0005783	NULL	dolichyl-diphosphooligosaccharide--protein glycosyltransferase subunit 2-like	IPR008814	Dolichyl-diphosphooligosaccharide--protein glycosyltransferase subunit Swp1	GO:0006487|GO:0008250|GO:0016021	EC:2.4.99.18	KEGG: 00510+2.4.99.18|KEGG: 00513+2.4.99.18|UniPathway: UPA00378
Dr11704	NULL	NULL	NULL	IPR002885|IPR011990	Pentatricopeptide repeat|Tetratricopeptide-like helical	GO:0005515	NULL	NULL
Dr11765	GO:0016740	NULL	pentatricopeptide repeat-containing protein	IPR002885|IPR011990	Pentatricopeptide repeat|Tetratricopeptide-like helical	GO:0005515	NULL	NULL
Dr11772	GO:0032259|GO:0008168	EC:2.1.1.0	protein	IPR004159	Putative S-adenosyl-L-methionine-dependent methyltransferase	GO:0008168	EC:2.1.1.-	KEGG: 00130+2.1.1.-|KEGG: 00253+2.1.1.-|KEGG: 00270+2.1.1.-|KEGG: 00340+2.1.1.-|KEGG: 00350+2.1.1.-|KEGG: 00360+2.1.1.-|KEGG: 00380+2.1.1.-|KEGG: 00450+2.1.1.-|KEGG: 00522+2.1.1.-|KEGG: 00624+2.1.1.-|KEGG: 00627+2.1.1.-|KEGG: 00860+2.1.1.-|KEGG: 00940+2.1.1.-|KEGG: 00941+2.1.1.-|KEGG: 00942+2.1.1.-|KEGG: 00945+2.1.1.-|KEGG: 00950+2.1.1.-|KEGG: 00981+2.1.1.-
Dr11786	GO:0009941|GO:0044237|GO:0010020|GO:0050662|GO:0003824|GO:0005739|GO:0051301|GO:0000166	NULL	rossmann-fold nad -binding domain-containing protein	IPR010099|IPR013549|IPR016040	Sugar nucleotide epimerase YfcH,-like putative|Domain of unknown function DUF1731, C-terminal|NAD(P)-binding domain	NULL	NULL	NULL
Dr11825	GO:0019031|GO:0005525|GO:0006184|GO:0006886|GO:0009707|GO:0015450|GO:0042803|GO:0003924	NULL	translocase of chloroplast 34	IPR006703|IPR027417|IPR005688	AIG1|P-loop containing nucleoside triphosphate hydrolase|Chloroplast protein import component Toc34	GO:0005525|GO:0006886|GO:0009707|GO:0015450	NULL	NULL
Dr11873	NULL	NULL	NULL	IPR022709	Protein of unknown function DUF3550/UPF0682	NULL	NULL	NULL
Dr11812	GO:0005739	NULL	pentatricopeptide repeat-containing protein	IPR002885|IPR011990	Pentatricopeptide repeat|Tetratricopeptide-like helical	GO:0005515	NULL	NULL
Dr11884	GO:0003824	NULL	acetyl-coenzyme a synthetase	IPR000873|IPR025110|IPR009081|IPR011047|IPR027295|IPR018391|IPR006162|IPR020845	AMP-dependent synthetase/ligase|AMP-binding enzyme C-terminal domain|Acyl carrier protein-like|Quinonprotein alcohol dehydrogenase-like superfamily|Quinonprotein alcohol dehydrogenase-like domain|Pyrrolo-quinoline quinone beta-propeller repeat|Phosphopantetheine attachment site|AMP-binding, conserved site	GO:0003824|GO:0008152	NULL	UniPathway: UPA00094
Dr11935	GO:0005739	NULL	copper ion binding protein	NULL	NULL	NULL	NULL	NULL
Dr11943	GO:0009579|GO:0044425|GO:0009536	NULL	photosystem i p700 chlorophyll a apoprotein	IPR001763|IPR020936	Rhodanese-like domain|Uncharacterised protein family UPF0176	NULL	NULL	NULL
Dr11982	NULL	NULL	NULL	IPR002885|IPR011990	Pentatricopeptide repeat|Tetratricopeptide-like helical	GO:0005515	NULL	NULL
Dr11932	GO:0046688|GO:0005507|GO:0016023|GO:0052716|GO:0048046|GO:0046274|GO:0055114	NULL	phagocyte signaling-impaired	IPR001117|IPR011706|IPR011707|IPR019183|IPR008972|IPR011990|IPR017761|IPR002355	Multicopper oxidase, type 1|Multicopper oxidase, type 2|Multicopper oxidase, type 3|N-acetyltransferase B complex, non-catalytic subunit|Cupredoxin|Tetratricopeptide-like helical|Laccase|Multicopper oxidase, copper-binding site	GO:0016491|GO:0055114|GO:0005507|GO:0005515|GO:0046274|GO:0048046|GO:0052716	NULL	NULL
Dr12038	GO:0005739	NULL	uncharacterized protein	NULL	NULL	NULL	NULL	NULL
Dr12109	NULL	NULL	NULL	IPR002885	Pentatricopeptide repeat	NULL	NULL	NULL
Dr12343	GO:0019898|GO:0005509|GO:0009507|GO:0015979|GO:0009654	NULL	protein	IPR016123	Mog1/PsbP, alpha/beta/alpha sandwich	NULL	NULL	NULL
Dr12317	GO:0016020|GO:0009941|GO:0000166|GO:0051744	NULL	pale-green and chlorophyll b reduced 2	IPR016040	NAD(P)-binding domain	NULL	NULL	NULL
Dr12377	GO:0003743|GO:0006367|GO:0005673|GO:0005840|GO:0006446	NULL	general transcription factor iie subunit	IPR016656	Transcription initiation factor TFIIE, beta subunit	GO:0005673|GO:0006367	NULL	NULL
Dr12406	GO:0005829|GO:0009343|GO:0003989|GO:0006633|GO:0046872|GO:2001295|GO:0005524|GO:0004075|GO:0006090	EC:6.4.1.2|EC:6.3.4.14	acetyl- carboxylase	IPR005481|IPR000089|IPR000022|IPR005482|IPR005479|IPR013537|IPR011053|IPR011054|IPR016185|IPR013815|IPR013816|IPR011761|IPR011764|IPR011762|IPR011763	Carbamoyl-phosphate synthase, large subunit, N-terminal|Biotin/lipoyl attachment|Carboxyl transferase|Biotin carboxylase, C-terminal|Carbamoyl-phosphate synthetase large subunit-like, ATP-binding domain|Acetyl-CoA carboxylase, central domain|Single hybrid motif|Rudiment single hybrid motif|Pre-ATP-grasp domain|ATP-grasp fold, subdomain 1|ATP-grasp fold, subdomain 2|ATP-grasp fold|Biotin carboxyla…	GO:0003824|GO:0008152|GO:0016874|GO:0005524|GO:0003989|GO:0006633|GO:0046872|GO:0004075	EC:6.4.1.2|EC:6.4.1.2+6.3.4.14	KEGG: 00061+6.4.1.2|KEGG: 00253+6.4.1.2|KEGG: 00620+6.4.1.2|KEGG: 00640+6.4.1.2|KEGG: 00720+6.4.1.2|MetaCyc: PWY-4381|MetaCyc: PWY-5743|MetaCyc: PWY-5744|MetaCyc: PWY-5789|MetaCyc: PWY-6679|UniPathway: UPA00655|KEGG: 00061+6.4.1.2+6.3.4.14|KEGG: 00253+6.4.1.2|KEGG: 00620+6.4.1.2|KEGG: 00640+6.4.1.2|KEGG: 00720+6.4.1.2|MetaCyc: PWY-4381|MetaCyc: PWY-5743|MetaCyc: PWY-5744|MetaCyc: PWY-5789|MetaCyc…
Dr12436	GO:0005739	NULL	pentatricopeptide repeat-containing protein	IPR002885|IPR011990	Pentatricopeptide repeat|Tetratricopeptide-like helical	GO:0005515	NULL	NULL
Dr12437	GO:0031425|GO:0009507	NULL	pentatricopeptide repeat-containing protein	IPR002885|IPR011990	Pentatricopeptide repeat|Tetratricopeptide-like helical	GO:0005515	NULL	NULL
Dr12421	GO:0044710|GO:0005739|GO:0009507|GO:0003824	NULL	fad nad -binding oxidoreductase domain-containing protein	IPR002937	Amine oxidase	GO:0016491|GO:0055114	NULL	NULL
Dr12482	GO:0004008|GO:0016021|GO:0046872|GO:0005524|GO:0009535|GO:0060003	EC:3.6.3.4	p-type atpase	IPR008250|IPR006121|IPR023214|IPR023299|IPR001757|IPR027256|IPR018303	P-type ATPase, A domain|Heavy metal-associated domain, HMA|HAD-like domain|Cation-transporting P-type ATPase|P-type ATPase, cytoplasmic domain N|Cation-transporting P-type ATPase, subfamily IB|P-type ATPase, phosphorylation site	GO:0000166|GO:0046872|GO:0030001|GO:0006812|GO:0016021|GO:0019829	NULL	NULL
Dr12507	NULL	NULL	NULL	IPR002885	Pentatricopeptide repeat	NULL	NULL	NULL
Dr12591	GO:0016787|GO:0009536|GO:0046685	NULL	metallo-beta-lactamase family protein	IPR001279	Beta-lactamase-like	GO:0016787	NULL	NULL
Dr12603	NULL	NULL	NULL	IPR002885|IPR011990	Pentatricopeptide repeat|Tetratricopeptide-like helical	GO:0005515	NULL	NULL
Dr12529	GO:0000439|GO:0016023|GO:0004003|GO:0006289|GO:0005657	NULL	transcription initiation factor tfiih subunit h4	IPR004598	Transcription factor TFIIH subunit p52/Tfb2	GO:0000439|GO:0004003|GO:0005634|GO:0006289	NULL	NULL
Dr12672	NULL	NULL	NULL	IPR002885|IPR011990	Pentatricopeptide repeat|Tetratricopeptide-like helical	GO:0005515	NULL	NULL
Dr02008	GO:0050896|GO:0005739	NULL	pentatricopeptide repeat-containing protein	IPR002885|IPR011990	Pentatricopeptide repeat|Tetratricopeptide-like helical	GO:0005515	NULL	NULL
Dr02043	GO:0016020|GO:0006810	NULL	vesicle-associated membrane protein 724	IPR001388|IPR010908|IPR011012	Synaptobrevin|Longin domain|Longin-like domain	GO:0016021|GO:0016192|GO:0006810	NULL	NULL
Dr02075	GO:0046872|GO:0044267	NULL	f-box protein skip5	IPR011050|IPR001810|IPR012334	Pectin lyase fold/virulence factor|F-box domain|Pectin lyase fold	GO:0005515	NULL	NULL
Dr02078	GO:0006424|GO:0005739|GO:0048481|GO:0005524|GO:0000049|GO:0009507|GO:0004818|GO:0009332|GO:0015994	EC:6.1.1.17	glutamyl-trna synthetase	IPR000924|IPR020058|IPR008925|IPR020751|IPR020061|IPR014729|IPR004527|IPR001412	Glutamyl/glutaminyl-tRNA synthetase|Glutamyl/glutaminyl-tRNA synthetase, class Ib, catalytic domain|Aminoacyl-tRNA synthetase, class I, anticodon-binding|Aminoacyl-tRNA synthetase, class I, anticodon-binding domain, subdomain 2|Glutamyl/glutaminyl-tRNA synthetase, class Ib, alpha-bundle domain|Rossmann-like alpha/beta/alpha sandwich fold|Glutamate-tRNA ligase, bacterial/mitochondrial|Aminoacyl-tR…	GO:0000166|GO:0005524|GO:0005737|GO:0016876|GO:0043039|GO:0000049|GO:0004812|GO:0006418|GO:0004818|GO:0006424	EC:6.1.1.17	Reactome: REACT_71|KEGG: 00860+6.1.1.17|KEGG: 00970+6.1.1.17|MetaCyc: PWY-5188|KEGG: 00860+6.1.1.17|KEGG: 00970+6.1.1.17|MetaCyc: PWY-5188|Reactome: REACT_71
Dr02126	NULL	NULL	NULL	IPR007146|IPR018972	Sas10/Utp3/C1D|Sas10 C-terminal domain	NULL	NULL	NULL
Dr02168	GO:0046872	NULL	calcium-binding ef hand family protein	IPR013105|IPR011992|IPR011990|IPR019734|IPR002048|IPR013026	Tetratricopeptide TPR2|EF-hand domain pair|Tetratricopeptide-like helical|Tetratricopeptide repeat|EF-hand domain|Tetratricopeptide repeat-containing domain	GO:0005509|GO:0005515	NULL	NULL
Dr02211	NULL	NULL	NULL	IPR001810|IPR015916	F-box domain|Galactose oxidase, beta-propeller	GO:0005515	NULL	NULL
Dr02258	GO:0005488	NULL	pentatricopeptide repeat-containing protein	IPR002885|IPR011990	Pentatricopeptide repeat|Tetratricopeptide-like helical	GO:0005515	NULL	NULL
Dr02277	GO:0006468|GO:0005524|GO:0004674|GO:0009069	EC:2.7.11.0	probable lrr receptor-like serine threonine-protein kinase rkf3-like	IPR000719|IPR011009|IPR013320|IPR002290|IPR017441|IPR008271	Protein kinase domain|Protein kinase-like domain|Concanavalin A-like lectin/glucanase, subgroup|Serine/threonine- / dual specificity protein kinase, catalytic domain|Protein kinase, ATP binding site|Serine/threonine-protein kinase, active site	GO:0004672|GO:0005524|GO:0006468|GO:0016772|GO:0004674	NULL	NULL
Dr02340	GO:0048364|GO:0009941|GO:0006777|GO:0006879|GO:0005743|GO:0016021|GO:0008559|GO:0050790|GO:0009555|GO:0009658|GO:0046686|GO:0010288|GO:0006200|GO:0040014|GO:0005524|GO:0010380|GO:0006855	EC:3.6.3.44	abc transporter b family member mitochondrial-like	IPR003439|IPR001140|IPR004776|IPR027417|IPR011527|IPR003593|IPR017871	ABC transporter-like|ABC transporter, transmembrane domain|Auxin efflux carrier|P-loop containing nucleoside triphosphate hydrolase|ABC transporter type 1, transmembrane domain|AAA+ ATPase domain|ABC transporter, conserved site	GO:0005524|GO:0016887|GO:0006810|GO:0016021|GO:0042626|GO:0055085|GO:0000166|GO:0017111	NULL	NULL
Dr02394	GO:0009089|GO:0008837|GO:0009507	EC:5.1.1.7	diaminopimelate epimerase	IPR001653|IPR018510	Diaminopimelate epimerase, DapF|Diaminopimelate epimerase, active site	GO:0008837|GO:0009089|GO:0005737	EC:5.1.1.7	KEGG: 00300+5.1.1.7|MetaCyc: PWY-2941|MetaCyc: PWY-5097|UniPathway: UPA00034
Dr02458	GO:0016020	NULL	plac8 family protein	IPR006461|IPR021369	Uncharacterised protein family Cys-rich|Protein of unknown function DUF2985	NULL	NULL	NULL
Dr02389	GO:0009536	NULL	pentatricopeptide repeat-containing protein	IPR002885|IPR011990	Pentatricopeptide repeat|Tetratricopeptide-like helical	GO:0005515	NULL	NULL
Dr02384	NULL	NULL	NULL	IPR001251	CRAL-TRIO domain	NULL	NULL	NULL
Dr02385	GO:0017168|GO:0006751	EC:3.5.2.9	oxoprolinase family protein	IPR002821|IPR003692|IPR008040	Hydantoinase/oxoprolinase|Hydantoinase B/oxoprolinase|Hydantoinaseoxoprolinase, N-terminal	GO:0016787|GO:0003824	NULL	NULL
Dr12800	GO:0032313|GO:0044444	NULL	run and tbc1 domain containing	IPR000195	Rab-GTPase-TBC domain	GO:0005097|GO:0032313	NULL	NULL
Dr12962	GO:0005739	NULL	pentatricopeptide repeat-containing protein	IPR002885	Pentatricopeptide repeat	NULL	NULL	NULL
Dr12925	GO:0016301|GO:0008152	NULL	probably inactive leucine-rich repeat receptor-like protein kinase	IPR000719|IPR001611|IPR013210|IPR011009|IPR003591|IPR017441	Protein kinase domain|Leucine-rich repeat|Leucine-rich repeat-containing N-terminal, type 2|Protein kinase-like domain|Leucine-rich repeat, typical subtype|Protein kinase, ATP binding site	GO:0004672|GO:0005524|GO:0006468|GO:0005515|GO:0016772	NULL	NULL
Dr12929	NULL	NULL	NULL	NULL	NULL	NULL	NULL	NULL
Dr13004	NULL	NULL	NULL	IPR013951|IPR004043	Histone deacetylation protein Rxt3|LCCL domain	NULL	NULL	NULL
Dr13039	GO:0015450|GO:0016021|GO:0009941|GO:0042538|GO:0045038|GO:0010027|GO:0090342|GO:0009535|GO:0051205	NULL	inner membrane protein	IPR001708	Membrane insertase OXA1/ALB3/YidC	GO:0016021|GO:0051205	NULL	NULL
Dr13141	GO:0006412|GO:0005739|GO:0042586|GO:0008463|GO:0003677|GO:0005524|GO:0004386|GO:0009570|GO:0005506|GO:0006555|GO:0046487	EC:3.5.1.88|EC:3.5.1.31	peptide deformylase 1b	IPR000181|IPR023635	Formylmethionine deformylase|Peptide deformylase	GO:0005506|GO:0042586	NULL	NULL
Dr13160	GO:0016787|GO:0004300|GO:0080167|GO:0006550|GO:0006552|GO:0006554|GO:0006568|GO:0006574|GO:0006633|GO:0018874|GO:0019482|GO:0046251	EC:4.2.1.17	protein	NULL	NULL	NULL	NULL	NULL
Dr13218	NULL	NULL	NULL	NULL	NULL	NULL	NULL	NULL
Dr13270	GO:0009507	NULL	uncharacterized protein	NULL	NULL	NULL	NULL	NULL
Dr13293	NULL	NULL	NULL	IPR002885|IPR011990	Pentatricopeptide repeat|Tetratricopeptide-like helical	GO:0005515	NULL	NULL
Dr13367	GO:0004553|GO:0044699|GO:0009987|GO:0005975	EC:3.2.1.0	protein	IPR001944|IPR000922|IPR008979|IPR017853|IPR013781|IPR019801	Glycoside hydrolase, family 35|D-galactoside/L-rhamnose binding SUEL lectin domain|Galactose-binding domain-like|Glycoside hydrolase, superfamily|Glycoside hydrolase, catalytic domain|Glycoside hydrolase, family 35, conserved site	GO:0004553|GO:0005975|GO:0030246|GO:0003824	EC:3.2.1.23	KEGG: 00052+3.2.1.23|KEGG: 00511+3.2.1.23|KEGG: 00531+3.2.1.23|KEGG: 00600+3.2.1.23|KEGG: 00604+3.2.1.23|MetaCyc: PWY-6791|MetaCyc: PWY-6807
Dr13285	GO:0009536	NULL	uncharacterized protein	IPR010298	Protein of unknown function DUF901	NULL	NULL	NULL
Dr13344	NULL	NULL	NULL	IPR002885|IPR011990	Pentatricopeptide repeat|Tetratricopeptide-like helical	GO:0005515	NULL	NULL
Dr13412	GO:0044763|GO:0003676|GO:0006259	NULL	dna repair protein xrcc3-like protein	IPR013632|IPR027417|IPR004504|IPR020588	DNA recombination and repair protein Rad51, C-terminal|DNA repair protein RadA|P-loop containing nucleoside triphosphate hydrolase|DNA recombination/repair protein RecA/RadB, ATP-binding domain	GO:0003684|GO:0005524|GO:0006281|GO:0003677|GO:0006259|GO:0008094	NULL	NULL
Dr13441	GO:0003916|GO:0009536|GO:0006265	NULL	adaptor protein kanadaptin	IPR000253|IPR013497|IPR006171|IPR008984|IPR023405|IPR013824|IPR013825|IPR000380|IPR003601|IPR003602|IPR023406	Forkhead-associated (FHA) domain|DNA topoisomerase, type IA, central|Toprim domain|DNA topoisomerase, type IA|SMAD/FHA domain|DNA topoisomerase, type IA, core domain|DNA topoisomerase, type IA, central region, subdomain 1|DNA topoisomerase, type IA, central region, subdomain 2|DNA topoisomerase, type IA, domain 2|DNA topoisomerase, type IA, DNA-binding|DNA topoisomerase, type IA, active site	GO:0005515|GO:0003677|GO:0003916|GO:0006265|GO:0003917	NULL	NULL
Dr13523	GO:0009944|GO:0016891|GO:0048608|GO:0003723|GO:0010492|GO:0010267|GO:0051252	EC:3.1.26.0	dicer-like protein 4	IPR001650|IPR000999|IPR003100|IPR005034|IPR027417|IPR014720|IPR014001	Helicase, C-terminal|Ribonuclease III domain|Argonaute/Dicer protein, PAZ domain|Dicer dimerisation domain|P-loop containing nucleoside triphosphate hydrolase|Double-stranded RNA-binding domain|Helicase, superfamily 1/2, ATP-binding domain	GO:0003676|GO:0004386|GO:0005524|GO:0003723|GO:0004525|GO:0006396|GO:0005515|GO:0016891	NULL	NULL
Dr13556	NULL	NULL	NULL	IPR021899	Protein of unknown function DUF3511	NULL	NULL	NULL
Dr02492	GO:0009987|GO:0016023	NULL	molybdopterin biosynthesis protein cnx1-like	IPR001453|IPR005110|IPR005111|IPR020817|IPR008284	Molybdopterin binding domain|MoeA, N-terminal and linker domain|MoeA, C-terminal, domain IV|Molybdenum cofactor synthesis|Molybdenum cofactor biosynthesis, conserved site	GO:0006777|GO:0032324	NULL	MetaCyc: PWY-6823|UniPathway: UPA00344|UniPathway: UPA00344
Dr13673	GO:0009536	NULL	pentatricopeptide repeat-containing protein	IPR013069|IPR002885|IPR011333|IPR011990|IPR000210	BTB/POZ|Pentatricopeptide repeat|BTB/POZ fold|Tetratricopeptide-like helical|BTB/POZ-like	GO:0005515	NULL	NULL
Dr13714	GO:0003676|GO:0009628|GO:0006950	NULL	chromatin remodeling complex subunit	IPR000330|IPR001650|IPR011992|IPR027417|IPR002048|IPR014001|IPR018247	SNF2-related|Helicase, C-terminal|EF-hand domain pair|P-loop containing nucleoside triphosphate hydrolase|EF-hand domain|Helicase, superfamily 1/2, ATP-binding domain|EF-Hand 1, calcium-binding site	GO:0003677|GO:0005524|GO:0003676|GO:0004386|GO:0005509	NULL	NULL
Dr13771	NULL	NULL	NULL	IPR001810|IPR006553	F-box domain|Leucine-rich repeat, cysteine-containing subtype	GO:0005515	NULL	NULL
Dr13756	GO:0009941|GO:0018708|GO:0005886|GO:0032259	EC:2.1.1.9	methyl chloride transferase	IPR008854	TPMT family	GO:0008757	EC:2.1.1.67	KEGG: 00983+2.1.1.67
Dr13793	GO:0003676|GO:0016023|GO:0016787|GO:0016020	NULL	metallophosphoesterase at3g03305-like	NULL	NULL	NULL	NULL	NULL
Dr13804	GO:0008152|GO:0016829|GO:0009507	NULL	#NAME?	IPR015813	Pyruvate/Phosphoenolpyruvate kinase-like domain	GO:0003824	NULL	NULL
Dr13877	NULL	NULL	NULL	IPR003788	Putative S-adenosyl-L-methionine-dependent methyltransferase MidA	NULL	NULL	NULL
Dr13868	GO:0016023	NULL	pentatricopeptide repeat-containing protein	IPR002885|IPR011990	Pentatricopeptide repeat|Tetratricopeptide-like helical	GO:0005515	NULL	NULL
Dr13871	GO:0003917|GO:0005694|GO:0006265|GO:0009536	EC:5.99.1.2	dna topoisomerase iii	IPR000380|IPR013497|IPR006171|IPR023405|IPR013824|IPR013825|IPR003601|IPR003602	DNA topoisomerase, type IA|DNA topoisomerase, type IA, central|Toprim domain|DNA topoisomerase, type IA, core domain|DNA topoisomerase, type IA, central region, subdomain 1|DNA topoisomerase, type IA, central region, subdomain 2|DNA topoisomerase, type IA, domain 2|DNA topoisomerase, type IA, DNA-binding	GO:0003677|GO:0003917|GO:0006265|GO:0003916	NULL	NULL
Dr13882	GO:0052691|GO:0005794|GO:0005515|GO:0030244|GO:0008466|GO:0009651	EC:5.4.99.30|EC:2.4.1.186	alpha- -glucan-protein synthase	IPR004901	Reversibly glycosylated polypeptide family	GO:0016866|GO:0030244	NULL	NULL
Dr13883	NULL	NULL	NULL	IPR002885	Pentatricopeptide repeat	NULL	NULL	NULL
Dr13958	GO:0006457|GO:0016491|GO:0005528|GO:0031977|GO:0009507|GO:0000413|GO:0016020|GO:0003755|GO:0055114	EC:5.2.1.8	probable fkbp-type peptidyl-prolyl cis-trans isomerase chloroplastic-like	IPR023566|IPR001179	Peptidyl-prolyl cis-trans isomerase, FKBP-type|Peptidyl-prolyl cis-trans isomerase, FKBP-type, domain	GO:0006457	NULL	NULL
Dr13990	GO:0009536	NULL	trna pseudouridine synthase pus10-like	IPR020103	Pseudouridine synthase, catalytic domain	GO:0001522|GO:0003723|GO:0009451|GO:0009982	NULL	NULL
Dr13995	NULL	NULL	NULL	IPR000626|IPR019956|IPR019955|IPR019954	Ubiquitin domain|Ubiquitin|Ubiquitin supergroup|Ubiquitin conserved site	GO:0005515	NULL	NULL
Dr14056	NULL	NULL	NULL	IPR002885|IPR011990	Pentatricopeptide repeat|Tetratricopeptide-like helical	GO:0005515	NULL	NULL
Dr14067	GO:0003824	NULL	glyoxysomal processing glyoxysomal-like	IPR009003	Trypsin-like cysteine/serine peptidase domain	GO:0003824	NULL	NULL
Dr14073	GO:0009536|GO:0003677|GO:0016023|GO:0005524|GO:0004386|GO:0016020	NULL	snf2 super family	IPR000330|IPR001650|IPR027417|IPR014001	SNF2-related|Helicase, C-terminal|P-loop containing nucleoside triphosphate hydrolase|Helicase, superfamily 1/2, ATP-binding domain	GO:0003677|GO:0005524|GO:0003676|GO:0004386	NULL	NULL
Dr14089	GO:0009536	NULL	pentatricopeptide repeat-containing protein chloroplastic-like	IPR002885|IPR011990	Pentatricopeptide repeat|Tetratricopeptide-like helical	GO:0005515	NULL	NULL
Dr14008	NULL	NULL	NULL	IPR005636	DTW	NULL	NULL	NULL
Dr14102	NULL	NULL	NULL	IPR000408|IPR009091	Regulator of chromosome condensation, RCC1|Regulator of chromosome condensation 1/beta-lactamase-inhibitor protein II	NULL	NULL	NULL
Dr14167	GO:0003824	NULL	esterase lipase thioesterase family protein	IPR022742	Putative lysophospholipase	NULL	NULL	NULL
Dr14189	GO:0016787	NULL	btb poz domain-containing protein fbl11-like	IPR011333|IPR000210|IPR006553	BTB/POZ fold|BTB/POZ-like|Leucine-rich repeat, cysteine-containing subtype	GO:0005515	NULL	NULL
Dr14204	GO:0016020	NULL	iron-sulfur assembly-like protein	NULL	NULL	NULL	NULL	NULL
Dr14170	GO:0044763|GO:0005856|GO:0000166|GO:0003824|GO:0044707	NULL	kinesin-like calmodulin-binding protein homolog	IPR027640|IPR001752|IPR019748|IPR000857|IPR018979|IPR027417|IPR011254|IPR014352|IPR011993|IPR019749|IPR000299|IPR019821	Kinesin-like protein|Kinesin, motor domain|FERM central domain|MyTH4 domain|FERM, N-terminal|P-loop containing nucleoside triphosphate hydrolase|Prismane-like|FERM/acyl-CoA-binding protein, 3-helical bundle|Pleckstrin homology-like domain|Band 4.1 domain|FERM domain|Kinesin, motor region, conserved site	GO:0003777|GO:0005871|GO:0007018|GO:0005524|GO:0008017|GO:0005856|GO:0003824|GO:0016491|GO:0055114	NULL	NULL
Dr02607	GO:0005488|GO:0044763|GO:0048364|GO:0005856|GO:0009536	NULL	morphogenesis of root hair 2	IPR027640|IPR001752|IPR000225|IPR016024|IPR027417|IPR011989|IPR019821	Kinesin-like protein|Kinesin, motor domain|Armadillo|Armadillo-type fold|P-loop containing nucleoside triphosphate hydrolase|Armadillo-like helical|Kinesin, motor region, conserved site	GO:0003777|GO:0005871|GO:0007018|GO:0005524|GO:0008017|GO:0005515|GO:0005488	NULL	NULL
Dr02646	GO:0044464	NULL	tir-nbs resistance protein	IPR002182|IPR000157|IPR027417	NB-ARC|Toll/interleukin-1 receptor homology (TIR) domain|P-loop containing nucleoside triphosphate hydrolase	GO:0043531|GO:0005515|GO:0007165	NULL	NULL
Dr02893	GO:0009897|GO:0010103|GO:0006508|GO:0016491|GO:0016023|GO:0042127|GO:0004252	EC:3.4.21.0	subtilisin-like protease sdd1-like	IPR015500|IPR000209|IPR003137|IPR010259|IPR023828	Peptidase S8, subtilisin-related|Peptidase S8/S53 domain|Protease-associated domain, PA|Proteinase inhibitor I9|Peptidase S8, subtilisin, Ser-active site	GO:0004252|GO:0006508|GO:0042802|GO:0043086	NULL	NULL
Dr02900	GO:0005737|GO:0030170|GO:0009611|GO:0004837|GO:0004058|GO:0006570|GO:0009821|GO:0006547|GO:0006558|GO:0006568|GO:0042432	EC:4.1.1.25|EC:4.1.1.28	tyrosine decarboxylase	IPR002129|IPR015424|IPR015421|IPR015422|IPR010977|IPR021115	Pyridoxal phosphate-dependent decarboxylase|Aromatic-L-amino-acid decarboxylase|Pyridoxal phosphate-dependent transferase|Pyridoxal phosphate-dependent transferase, major region, subdomain 1|Pyridoxal phosphate-dependent transferase, major region, subdomain 2|Pyridoxal-phosphate binding site	GO:0016831|GO:0019752|GO:0030170|GO:0003824|GO:0006520	NULL	NULL
Dr02341	GO:0003824|GO:0009536	NULL	alpha beta fold family expressed	NULL	NULL	NULL	NULL	NULL
Dr14349	GO:0046872	NULL	protein	IPR020683|IPR013083|IPR001841|IPR002110	Ankyrin repeat-containing domain|Zinc finger, RING/FYVE/PHD-type|Zinc finger, RING-type|Ankyrin repeat	GO:0005515|GO:0008270	NULL	NULL
Dr14378	GO:0010150|GO:0016023|GO:0034434|GO:0046027|GO:0080095|GO:0016127|GO:0080096|GO:0042967	EC:2.3.1.158	phospholipid--sterol o-acyltransferase-like	IPR003386	Lecithin:cholesterol/phospholipid:diacylglycerol acyltransferase	GO:0006629|GO:0008374	NULL	NULL
Dr14394	NULL	NULL	NULL	IPR011990|IPR019734|IPR013026	Tetratricopeptide-like helical|Tetratricopeptide repeat|Tetratricopeptide repeat-containing domain	GO:0005515	NULL	NULL
Dr14410	GO:0016491|GO:0009536	NULL	protein	IPR007516|IPR007525	Coenzyme F420 hydrogenase/dehydrogenase beta subunit, N-terminal|Coenzyme F420 hydrogenase/dehydrogenase beta subunit, C-terminal	NULL	NULL	NULL
Dr14426	GO:0003676|GO:0005739|GO:0006427|GO:0005524|GO:0004386|GO:0004821|GO:0009507|GO:0006547	EC:6.1.1.21	histidyl-trna synthetase	IPR004516|IPR004154|IPR015807|IPR006195	Histidine-tRNA ligase/ATP phosphoribosyltransferase regulatory subunit|Anticodon-binding|Histidine-tRNA ligase|Aminoacyl-tRNA synthetase, class II	GO:0005737|GO:0004821|GO:0005524|GO:0006427|GO:0004812|GO:0006418	EC:6.1.1.21	Reactome: REACT_71|KEGG: 00970+6.1.1.21|Reactome: REACT_71
Dr14373	GO:0050660|GO:0050661|GO:0005777|GO:0045454|GO:0004362|GO:0006749|GO:0022900|GO:0006094|GO:0006118	EC:1.8.1.7	glutathione reductase	IPR001327|IPR004099|IPR023753|IPR016156|IPR013027|IPR006324|IPR012999	Pyridine nucleotide-disulphide oxidoreductase, NAD-binding domain|Pyridine nucleotide-disulphide oxidoreductase, dimerisation domain|Pyridine nucleotide-disulphide oxidoreductase, FAD/NAD(P)-binding domain|FAD-dependent pyridine nucleotide-disulphide oxidoreductase|FAD/NAD-linked reductase, dimerisation domain|Glutathione-disulphide reductase|Pyridine nucleotide-disulphide oxidoreductase, class I…	GO:0016491|GO:0050660|GO:0055114|GO:0045454|GO:0004362|GO:0006749|GO:0050661|GO:0016668	EC:1.8.1.7	KEGG: 00480+1.8.1.7|MetaCyc: PWY-4081
Dr14452	GO:0009536	NULL	kinesin-like protein	IPR027640|IPR001752|IPR010994|IPR027417	Kinesin-like protein|Kinesin, motor domain|RuvA domain 2-like|P-loop containing nucleoside triphosphate hydrolase	GO:0003777|GO:0005871|GO:0007018|GO:0005524|GO:0008017	NULL	Reactome: REACT_216
Dr14453	GO:0009555|GO:0005507|GO:0004160|GO:0009570|GO:0009097|GO:0009098|GO:0009099|GO:0015940	EC:4.2.1.9	dihydroxy-acid dehydratase	IPR000581|IPR015928|IPR004404|IPR020558	Dihydroxy-acid/6-phosphogluconate dehydratase|Aconitase/3-isopropylmalate dehydratase, swivel|Dihydroxy-acid dehydratase|Dihydroxy-acid/6-phosphogluconate dehydratase, conserved site	GO:0003824|GO:0008152|GO:0004160|GO:0009082	EC:4.2.1.9	KEGG: 00290+4.2.1.9|KEGG: 00770+4.2.1.9|MetaCyc: PWY-5101|MetaCyc: PWY-5103|MetaCyc: PWY-5104|MetaCyc: PWY-7111|UniPathway: UPA00047|UniPathway: UPA00049
Dr14329	NULL	NULL	NULL	NULL	NULL	NULL	NULL	NULL
Dr14386	GO:0009536	NULL	uncharacterized protein yqjg-like	IPR016639|IPR004045|IPR010987|IPR012336	Glutathione S-transferase (GST)|Glutathione S-transferase, N-terminal|Glutathione S-transferase, C-terminal-like|Thioredoxin-like fold	GO:0005515	EC:2.5.1.18	KEGG: 00480+2.5.1.18|KEGG: 00980+2.5.1.18|KEGG: 00982+2.5.1.18|MetaCyc: PWY-4061|MetaCyc: PWY-6842|MetaCyc: PWY-7112
Dr14397	GO:0009543|GO:0008236|GO:0006508|GO:0005739	NULL	peptidase s41 family protein	IPR005151|IPR001478|IPR004447	Interphotoreceptor retinol-binding|PDZ domain|C-terminal-processing peptidase S41A	GO:0006508|GO:0008236|GO:0005515	NULL	NULL
Dr14407	GO:0044434|GO:0009579	NULL	metal ion binding	NULL	NULL	NULL	NULL	NULL
Dr14411	GO:0004672|GO:0006468|GO:0005524|GO:0009507	NULL	protein	IPR002575|IPR004147|IPR011009|IPR000719	Aminoglycoside phosphotransferase|UbiB domain|Protein kinase-like domain|Protein kinase domain	GO:0016772|GO:0004672|GO:0005524|GO:0006468	NULL	NULL
Dr14414	GO:0046872|GO:0009055|GO:0045454|GO:0009570|GO:0051537|GO:0015035|GO:0006118	NULL	grx_s12 - glutaredoxin subgroup i	IPR002109|IPR012336|IPR014025|IPR011899	Glutaredoxin|Glutaredoxin subgroup|Thioredoxin-like fold|Glutaredoxin, eukaryotic/virial	GO:0009055|GO:0015035|GO:0045454	NULL	NULL
Dr14429	NULL	NULL	NULL	IPR001594	Zinc finger, DHHC-type, palmitoyltransferase	GO:0008270	NULL	NULL
Dr14336	GO:0004672|GO:0016023|GO:0043167|GO:0000166|GO:0016310	NULL	protein kinase	IPR000719|IPR011009|IPR013320|IPR002290|IPR017441|IPR008271	Protein kinase domain|Protein kinase-like domain|Concanavalin A-like lectin/glucanase, subgroup|Serine/threonine- / dual specificity protein kinase, catalytic domain|Protein kinase, ATP binding site|Serine/threonine-protein kinase, active site	GO:0004672|GO:0005524|GO:0006468|GO:0016772|GO:0004674	NULL	NULL
Dr14347	GO:0009941|GO:0004032|GO:0009570|GO:0055114|GO:0006000|GO:0006012|GO:0006013|GO:0006090|GO:0046486	EC:1.1.1.21	protein tas-like	IPR001395|IPR023210|IPR020471	Aldo/keto reductase|NADP-dependent oxidoreductase domain|Aldo/keto reductase subgroup	GO:0016491|GO:0055114	NULL	NULL
Dr14345	GO:0009058|GO:0016874|GO:0000166|GO:0005737	NULL	pantoate--beta-alanine ligase	IPR003721|IPR014729|IPR004821	Pantoate-beta-alanine ligase|Rossmann-like alpha/beta/alpha sandwich fold|Cytidyltransferase-like domain	GO:0004592|GO:0015940|GO:0003824|GO:0009058	EC:6.3.2.1	KEGG: 00410+6.3.2.1|KEGG: 00770+6.3.2.1|UniPathway: UPA00028
Dr14355	GO:0016023|GO:0005794|GO:0032259|GO:0005634|GO:0008270|GO:0005886|GO:0008168	EC:2.1.1.0	probable methyltransferase pmt8-like	IPR004159	Putative S-adenosyl-L-methionine-dependent methyltransferase	GO:0008168	EC:2.1.1.-	KEGG: 00130+2.1.1.-|KEGG: 00253+2.1.1.-|KEGG: 00270+2.1.1.-|KEGG: 00340+2.1.1.-|KEGG: 00350+2.1.1.-|KEGG: 00360+2.1.1.-|KEGG: 00380+2.1.1.-|KEGG: 00450+2.1.1.-|KEGG: 00522+2.1.1.-|KEGG: 00624+2.1.1.-|KEGG: 00627+2.1.1.-|KEGG: 00860+2.1.1.-|KEGG: 00940+2.1.1.-|KEGG: 00941+2.1.1.-|KEGG: 00942+2.1.1.-|KEGG: 00945+2.1.1.-|KEGG: 00950+2.1.1.-|KEGG: 00981+2.1.1.-
Dr14348	GO:0003676	NULL	rho termination factor	NULL	NULL	NULL	NULL	NULL
Dr14465	GO:0016120|GO:0009507|GO:0016020	NULL	15-cis-zeta-carotene isomerase	IPR009915	NnrU	NULL	NULL	NULL
Dr14482	GO:0005543	NULL	uncharacterized protein	IPR002913|IPR009769|IPR011993|IPR023393|IPR001849	START domain|Domain of unknown function DUF1336|Pleckstrin homology-like domain|START-like domain|Pleckstrin homology domain	GO:0008289|GO:0005515|GO:0005543	NULL	NULL
Dr14488	NULL	NULL	NULL	NULL	NULL	NULL	NULL	NULL
Dr14493	NULL	NULL	NULL	NULL	NULL	NULL	NULL	NULL
Dr14529	GO:0032502|GO:0007126|GO:0009536	NULL	multipolar spindle 1	NULL	NULL	NULL	NULL	NULL
Dr14538	GO:0016023|GO:0005773|GO:0004185|GO:0006508	EC:3.4.16.0	serine carboxypeptidase ii-2	IPR001563|IPR018202	Peptidase S10, serine carboxypeptidase|Peptidase S10, serine carboxypeptidase, active site	GO:0004185|GO:0006508	NULL	NULL
Dr14542	GO:0009536	NULL	tsi1-interacting protein tsip1	IPR001305	Heat shock protein DnaJ, cysteine-rich domain	GO:0031072|GO:0051082	NULL	NULL
Dr14544	NULL	NULL	NULL	NULL	NULL	NULL	NULL	NULL
Dr14547	GO:0097159|GO:1901363	NULL	zinc finger ccch domain-containing protein 18-like	IPR000467|IPR000571	G-patch domain|Zinc finger, CCCH-type	GO:0003676|GO:0046872	NULL	NULL
Dr14480	GO:0003678|GO:0032508|GO:0042555|GO:0003677|GO:0005524|GO:0006270|GO:0005737|GO:0005634|GO:0005657	NULL	dna replication licensing factor mcm5-a-like	IPR001208|IPR027925|IPR012340|IPR027417|IPR008048|IPR018525	Mini-chromosome maintenance, DNA-dependent ATPase|MCM N-terminal domain|DNA replication licensing factor Mcm|Nucleic acid-binding, OB-fold|P-loop containing nucleoside triphosphate hydrolase|Mini-chromosome maintenance, conserved site	GO:0003677|GO:0005524|GO:0006260|GO:0003678|GO:0005634|GO:0006270|GO:0042555	NULL	Reactome: REACT_152|Reactome: REACT_1538|Reactome: REACT_383
Dr14515	GO:0045485|GO:0006636|GO:0010205|GO:0031969	NULL	chloroplast omega-6 fatty acid desaturase	IPR005804	Fatty acid desaturase, type 1	GO:0006629	NULL	NULL
Dr14522	GO:0005737|GO:0000773|GO:0080101|GO:0008654|GO:0016627|GO:0032259|GO:0016021|GO:0006544|GO:0006563|GO:0006566	EC:2.1.1.71	phospholipid n-methyltransferase	IPR024960|IPR007318	Phosphatidylethanolamine N-methyltransferase/Methylene-fatty-acyl-phospholipid synthase|Phospholipid methyltransferase	GO:0006644|GO:0008170	EC:2.1.1.17+2.1.1.71|EC:2.1.1.17	KEGG: 00564+2.1.1.17+2.1.1.71|MetaCyc: PWY-6825|UniPathway: UPA00753|KEGG: 00564+2.1.1.17|MetaCyc: PWY-6825|UniPathway: UPA00753
Dr14545	GO:0005773|GO:0016787|GO:0016853	NULL	nudix hydrolase 3-like	IPR015797	NUDIX hydrolase domain-like	GO:0016787	NULL	NULL
Dr14550	GO:0005524|GO:0000186|GO:0004709|GO:0007178|GO:0009069	EC:2.7.11.25	protein kinase domain-containing protein	IPR000719|IPR011009|IPR002290|IPR017441	Protein kinase domain|Protein kinase-like domain|Serine/threonine- / dual specificity protein kinase, catalytic domain|Protein kinase, ATP binding site	GO:0004672|GO:0005524|GO:0006468|GO:0016772	NULL	NULL
Dr14556	NULL	NULL	NULL	IPR002125|IPR016193	CMP/dCMP deaminase, zinc-binding|Cytidine deaminase-like	GO:0008270|GO:0016787|GO:0003824	NULL	NULL
Dr14566	GO:0055085|GO:0008643|GO:0016021	NULL	protein	IPR004853	Triose-phosphate transporter domain	NULL	NULL	NULL
Dr14651	GO:0005739|GO:0016020	NULL	sulfite exporter family protein	IPR002781	Transmembrane protein TauE like	GO:0016021	NULL	NULL
Dr14653	GO:0046872|GO:0016874|GO:0016567|GO:0044428|GO:0006974	NULL	zinc ion binding protein	IPR026848|IPR019162|IPR013083	E3 ubiquitin-protein ligase FANCL|Fanconi anemia complex, subunit FancL, WD-repeat containing domain|Zinc finger, RING/FYVE/PHD-type	GO:0004842|GO:0006281|GO:0043240	EC:6.3.2.-	KEGG: 00300+6.3.2.-|KEGG: 00380+6.3.2.-|UniPathway: UPA00143
Dr14659	GO:0003676|GO:0004386|GO:0000166	NULL	dead box atp-dependent rna	IPR011545|IPR001650|IPR027417|IPR014001|IPR014014	DNA/RNA helicase, DEAD/DEAH box type, N-terminal|Helicase, C-terminal|P-loop containing nucleoside triphosphate hydrolase|Helicase, superfamily 1/2, ATP-binding domain|RNA helicase, DEAD-box type, Q motif	GO:0003676|GO:0005524|GO:0008026|GO:0004386	NULL	NULL
Dr14672	GO:0005388|GO:0048364|GO:0016021|GO:0006828|GO:0015410|GO:0046872|GO:0055071|GO:0005524|GO:0006816|GO:0012505|GO:0005794|GO:0016529	EC:3.6.3.8|EC:3.6.3.35	calcium-transporting atpase endoplasmic reticulum-type-like	IPR008250|IPR006068|IPR023214|IPR023299|IPR023298|IPR001757|IPR005782	P-type ATPase, A domain|Cation-transporting P-type ATPase, C-terminal|HAD-like domain|Cation-transporting P-type ATPase|P-type ATPase, cytoplasmic domain N|P-type ATPase, transmembrane domain|Calcium-transporting P-type ATPase, subfamily IIA, SERCA-type	GO:0000166|GO:0046872|GO:0006812|GO:0016021|GO:0019829|GO:0005388|GO:0006816	NULL	NULL
Dr14680	GO:0008270|GO:0006544|GO:0005747|GO:0050897|GO:0032259|GO:0035999|GO:0004372|GO:0006563|GO:0030170|GO:0008168	EC:2.1.2.1|EC:2.1.1.0	mitochondrial serine hydroxymethyltransferase	IPR001085|IPR015424|IPR015421|IPR015422|IPR019798	Serine hydroxymethyltransferase|Pyridoxal phosphate-dependent transferase|Pyridoxal phosphate-dependent transferase, major region, subdomain 1|Pyridoxal phosphate-dependent transferase, major region, subdomain 2|Serine hydroxymethyltransferase, pyridoxal phosphate binding site	GO:0004372|GO:0006544|GO:0006563|GO:0003824|GO:0030170	EC:2.1.2.1	KEGG: 00260+2.1.2.1|KEGG: 00460+2.1.2.1|KEGG: 00630+2.1.2.1|KEGG: 00670+2.1.2.1|KEGG: 00680+2.1.2.1|MetaCyc: PWY-1622|MetaCyc: PWY-181|MetaCyc: PWY-2161|MetaCyc: PWY-2201|MetaCyc: PWY-3661|MetaCyc: PWY-3841|MetaCyc: PWY-5497|UniPathway: UPA00193|UniPathway: UPA00288
Dr14682	GO:0050896|GO:0003725	NULL	c-terminal domain phosphatase-like protein	IPR014720|IPR004274|IPR023214	Double-stranded RNA-binding domain|NLI interacting factor|HAD-like domain	GO:0005515	NULL	NULL
Dr14584	GO:0000166|GO:0055114|GO:0008270|GO:0051903	EC:1.1.1.284	alcohol dehydrogenase	IPR002085|IPR013149|IPR013154|IPR011032|IPR016040	Alcohol dehydrogenase superfamily, zinc-type|Alcohol dehydrogenase, C-terminal|Alcohol dehydrogenase GroES-like|GroES (chaperonin 10)-like|NAD(P)-binding domain	GO:0008270|GO:0016491|GO:0055114	NULL	NULL
Dr14630	NULL	NULL	NULL	IPR017986|IPR015943	WD40-repeat-containing domain|WD40/YVTN repeat-like-containing domain	GO:0005515	NULL	NULL
Dr14644	NULL	NULL	NULL	IPR005554	Nrap protein	NULL	NULL	NULL
Dr14650	GO:0000139|GO:0048280|GO:0008565|GO:0006886|GO:0005829|GO:0005739	NULL	golgin candidate 6-like	IPR024095|IPR006953|IPR006955|IPR016024|IPR011989	Vesicle tethering protein p115-like|Vesicle tethering protein Uso1/P115-like , head domain|Uso1/p115-like vesicle tethering protein, C-terminal|Armadillo-type fold|Armadillo-like helical	GO:0048193|GO:0000139|GO:0005737|GO:0006886|GO:0048280|GO:0008565|GO:0016020|GO:0005488	NULL	NULL
Dr14655	GO:0052654|GO:0009081|GO:0052656|GO:0052655	EC:2.6.1.42	branched-chain-amino-acid aminotransferase	IPR001544|IPR005786|IPR018300	Aminotransferase, class IV|Branched-chain amino acid aminotransferase II|Aminotransferase, class IV, conserved site	GO:0003824|GO:0008152|GO:0004084|GO:0009081	EC:2.6.1.42	Reactome: REACT_13|KEGG: 00280+2.6.1.42|KEGG: 00290+2.6.1.42|KEGG: 00770+2.6.1.42|KEGG: 00966+2.6.1.42|MetaCyc: PWY-5057|MetaCyc: PWY-5076|MetaCyc: PWY-5078|MetaCyc: PWY-5101|MetaCyc: PWY-5103|MetaCyc: PWY-5104|MetaCyc: PWY-5108|Reactome: REACT_13
Dr14664	GO:0005525|GO:0000917|GO:0005739	NULL	gtp-binding protein	IPR006073|IPR027417|IPR019987	GTP binding domain|P-loop containing nucleoside triphosphate hydrolase|GTP-binding protein, ribosome biogenesis, YsxC	GO:0005525|GO:0000917	NULL	NULL
Dr14677	NULL	NULL	NULL	NULL	NULL	NULL	NULL	NULL
Dr14679	GO:0005488	NULL	disease resistance response protein	IPR004265	Plant disease resistance response protein	NULL	NULL	NULL
Dr14583	NULL	NULL	NULL	NULL	NULL	NULL	NULL	NULL
Dr14602	GO:0005739|GO:0009051|GO:0004345|GO:0050661|GO:0009507|GO:0006749	EC:1.1.1.49	glucose-6-phosphate dehydrogenase	IPR001282|IPR022674|IPR022675|IPR016040|IPR019796	Glucose-6-phosphate dehydrogenase|Glucose-6-phosphate dehydrogenase, NAD-binding|Glucose-6-phosphate dehydrogenase, C-terminal|NAD(P)-binding domain|Glucose-6-phosphate dehydrogenase, active site	GO:0004345|GO:0006006|GO:0055114|GO:0050661	EC:1.1.1.49	KEGG: 00030+1.1.1.49|KEGG: 00480+1.1.1.49|MetaCyc: PWY-7268|UniPathway: UPA00115
Dr14631	GO:0006468|GO:0005524|GO:0004674|GO:0009536|GO:0009069	EC:2.7.11.0	protein kinase family protein	IPR001245|IPR011009|IPR013320|IPR002290|IPR000719|IPR017441|IPR008271	Serine-threonine/tyrosine-protein kinase catalytic domain|Protein kinase-like domain|Concanavalin A-like lectin/glucanase, subgroup|Serine/threonine- / dual specificity protein kinase, catalytic domain|Protein kinase domain|Protein kinase, ATP binding site|Serine/threonine-protein kinase, active site	GO:0004672|GO:0006468|GO:0016772|GO:0005524|GO:0004674	NULL	NULL
Dr14701	GO:0016020|GO:0008375	NULL	protein	IPR003406	Glycosyl transferase, family 14	GO:0008375|GO:0016020	NULL	NULL
Dr14688	GO:0009536	NULL	protein	IPR011013|IPR014718	Galactose mutarotase-like domain|Glycoside hydrolase-type carbohydrate-binding, subgroup	GO:0003824|GO:0005975|GO:0030246	NULL	NULL
Dr14734	GO:0043231|GO:0044444	NULL	uncharacterized protein	IPR008258|IPR023346	Lytic transglycosylase-like SLT domain|Lysozyme-like domain	NULL	NULL	NULL
Dr14765	GO:0006950	NULL	tetratricopeptide repeat-containing protein	IPR011990|IPR019734|IPR013026	Tetratricopeptide-like helical|Tetratricopeptide repeat|Tetratricopeptide repeat-containing domain	GO:0005515	NULL	NULL
Dr14798	GO:0048731|GO:0044767	NULL	u4 tri-snrnp-associated protein	IPR005011	SART-1 protein	NULL	NULL	NULL
Dr14733	GO:0004643|GO:0006164|GO:0003937|GO:0009409|GO:0009570|GO:0010319|GO:0006144|GO:0042720	EC:2.1.2.3|EC:3.5.4.10	bifunctional purine biosynthesis	IPR002695|IPR011607|IPR016193|IPR024051	AICARFT/IMPCHase bienzyme|Methylglyoxal synthase-like domain|Cytidine deaminase-like|AICAR transformylase domain	GO:0003937|GO:0004643|GO:0006164|GO:0003824	EC:3.5.4.10+2.1.2.3|EC:2.1.2.3	KEGG: 00230+3.5.4.10+2.1.2.3|KEGG: 00670+2.1.2.3|MetaCyc: PWY-6123|MetaCyc: PWY-6124|MetaCyc: PWY-7234|UniPathway: UPA00074|UniPathway: UPA00074
Dr14740	GO:0042026|GO:0046872|GO:0044699|GO:0016023|GO:0005524|GO:0016020|GO:0044434	NULL	ru large subunit-binding protein subunit chloroplastic-like	IPR002423|IPR027409|IPR027413|IPR001844|IPR018370	Chaperonin Cpn60/TCP-1|Chaperonin Cpn60|GroEL-like apical domain|GroEL-like equatorial domain|Chaperonin Cpn60, conserved site	GO:0005524|GO:0044267|GO:0005737|GO:0042026|GO:0006457	NULL	NULL
Dr14797	GO:0051287|GO:0055114|GO:0009651|GO:0003862|GO:0009941|GO:0009579|GO:0000287|GO:0009570|GO:0019761|GO:0009098|GO:0009097|GO:0009099	EC:1.1.1.85	3-isopropylmalate dehydrogenase	IPR001804|IPR024084|IPR004429|IPR019818	Isocitrate and isopropylmalate dehydrogenases family|Isopropylmalate dehydrogenase-like domain|Isopropylmalate dehydrogenase|Isocitrate/isopropylmalate dehydrogenase, conserved site	GO:0000287|GO:0016616|GO:0051287|GO:0055114|GO:0003862|GO:0005737|GO:0009098	EC:1.1.1.85	Reactome: REACT_1046|KEGG: 00290+1.1.1.85|UniPathway: UPA00048
Dr14806	NULL	NULL	NULL	IPR002088|IPR025875|IPR001611	Protein prenyltransferase, alpha subunit|Leucine rich repeat 4|Leucine-rich repeat	GO:0008318|GO:0018342|GO:0005515	NULL	NULL
Dr14835	NULL	NULL	NULL	IPR028124	Small acidic protein-like domain	NULL	NULL	NULL
Dr14850	NULL	NULL	NULL	IPR026827|IPR024372|IPR016024|IPR011989	Proteasome component ECM29/Translational activator GCN1|Proteasome stabiliser ECM29|Armadillo-type fold|Armadillo-like helical	GO:0005488	NULL	NULL
Dr14842	NULL	NULL	NULL	NULL	NULL	NULL	NULL	NULL
Dr14861	NULL	NULL	NULL	NULL	NULL	NULL	NULL	NULL
Dr14877	GO:0031965|GO:0006406|GO:0016023|GO:0009733	NULL	suppressor of auxin resistance1 protein	IPR021717|IPR017986|IPR015943	Nucleoporin Nup120/160|WD40-repeat-containing domain|WD40/YVTN repeat-like-containing domain	GO:0005515	NULL	NULL
Dr14883	GO:0008168|GO:0032259	EC:2.1.1.0	protein	IPR013216|IPR022238	Methyltransferase type 11|Uncharacterised protein family, methyltransferase, Williams-Beuren syndrome	GO:0008152|GO:0008168	EC:2.1.1.-	KEGG: 00130+2.1.1.-|KEGG: 00253+2.1.1.-|KEGG: 00270+2.1.1.-|KEGG: 00340+2.1.1.-|KEGG: 00350+2.1.1.-|KEGG: 00360+2.1.1.-|KEGG: 00380+2.1.1.-|KEGG: 00450+2.1.1.-|KEGG: 00522+2.1.1.-|KEGG: 00624+2.1.1.-|KEGG: 00627+2.1.1.-|KEGG: 00860+2.1.1.-|KEGG: 00940+2.1.1.-|KEGG: 00941+2.1.1.-|KEGG: 00942+2.1.1.-|KEGG: 00945+2.1.1.-|KEGG: 00950+2.1.1.-|KEGG: 00981+2.1.1.-
Dr14886	GO:0005886|GO:0009244|GO:0005783|GO:0016772	NULL	abc1 family protein	IPR001466|IPR004147|IPR009330|IPR011009|IPR012338	Beta-lactamase-related|UbiB domain|Lipopolysaccharide core heptose(II) kinase|Protein kinase-like domain|Beta-lactamase/transpeptidase-like	GO:0009244|GO:0016772	EC:2.7.1.-	KEGG: 00540+2.7.1.-|KEGG: 00680+2.7.1.-|KEGG: 00900+2.7.1.-|UniPathway: UPA00958
Dr14907	GO:0003677|GO:0032508|GO:0004003|GO:0005524|GO:0009536|GO:0006310|GO:0005657	NULL	atp-dependent dna helicase	IPR000212|IPR014016|IPR014017|IPR027417	DNA helicase, UvrD/REP type|UvrD-like Helicase, ATP-binding domain|DNA helicase, UvrD-like, C-terminal|P-loop containing nucleoside triphosphate hydrolase	GO:0003677|GO:0004003|GO:0005524|GO:0016787	NULL	NULL
Dr14919	GO:0004672|GO:0006468|GO:0005524|GO:0005739	NULL	aarf domain-containing kinase	IPR004147|IPR011009|IPR000719	UbiB domain|Protein kinase-like domain|Protein kinase domain	GO:0016772|GO:0004672|GO:0005524|GO:0006468	NULL	NULL
Dr14857	NULL	NULL	NULL	NULL	NULL	NULL	NULL	NULL
Dr14859	NULL	NULL	NULL	IPR006869|IPR025757	Domain of unknown function DUF547|Ternary complex factor MIP1, leucine-zipper	NULL	NULL	NULL
Dr14898	GO:0016132|GO:0030176|GO:0009918|GO:0005886|GO:0047598|GO:0055114	EC:1.3.1.21	7-dehydrocholesterol reductase	IPR001171|IPR018083	Ergosterol biosynthesis ERG4/ERG24|Sterol reductase, conserved site	GO:0016020|GO:0016628|GO:0055114	NULL	Reactome: REACT_22258
Dr14914	GO:0005488|GO:0016491|GO:0008152|GO:0009536	NULL	choline monooxygenase	IPR017941|IPR015879	Rieske [2Fe-2S] iron-sulphur domain|Aromatic-ring-hydroxylating dioxygenase, alpha subunit, C-terminal domain	GO:0016491|GO:0051537|GO:0055114|GO:0005506|GO:0016708|GO:0019439	NULL	NULL
Dr14932	GO:0016311|GO:0016791|GO:0005982|GO:0009507|GO:0005739	EC:3.1.3.0	protein tyrosine expressed	IPR014756|IPR000387	Immunoglobulin E-set|Protein-tyrosine/Dual specificity phosphatase	GO:0016311|GO:0016791	NULL	NULL
Dr14938	GO:0016630|GO:0009706|GO:0005739|GO:0055114|GO:0000166|GO:0015995|GO:0019685	EC:1.3.1.33	ww domain-containing oxidoreductase-like isoform 1	IPR002198|IPR016040|IPR002347	Short-chain dehydrogenase/reductase SDR|Glucose/ribitol dehydrogenase|NAD(P)-binding domain	GO:0008152|GO:0016491	NULL	NULL
Dr14939	GO:0009535	NULL	uncharacterized protein	IPR021562	Protein of unknown function DUF3007	NULL	NULL	NULL
Dr02947	GO:0004693|GO:0008353|GO:0007049|GO:0006468|GO:0005524|GO:0051301|GO:0000074|GO:0009069	EC:2.7.11.22|EC:2.7.11.23	cyclin-dependent kinase e-1	IPR000719|IPR011009|IPR002290|IPR017441|IPR008271	Protein kinase domain|Protein kinase-like domain|Serine/threonine- / dual specificity protein kinase, catalytic domain|Protein kinase, ATP binding site|Serine/threonine-protein kinase, active site	GO:0004672|GO:0005524|GO:0006468|GO:0016772|GO:0004674	NULL	NULL
Dr02967	GO:0010584|GO:0047077|GO:0016207|GO:0055114|GO:0000166|GO:0009411|GO:0009805|GO:0009809|GO:0009811	EC:1.13.12.7|EC:6.2.1.12	4-coumarate: ligase	IPR000873|IPR025110|IPR020845	AMP-dependent synthetase/ligase|AMP-binding enzyme C-terminal domain|AMP-binding, conserved site	GO:0003824|GO:0008152	NULL	NULL
Dr02981	GO:0010541|GO:0016021|GO:0010329|GO:0010540|GO:0010315|GO:0042626|GO:0055085|GO:0006200|GO:0005886|GO:0005524|GO:0005739	NULL	multidrug pheromone mdr abc transporter family	IPR003439|IPR001140|IPR027417|IPR011527|IPR003593|IPR017871	ABC transporter-like|ABC transporter, transmembrane domain|P-loop containing nucleoside triphosphate hydrolase|ABC transporter type 1, transmembrane domain|AAA+ ATPase domain|ABC transporter, conserved site	GO:0005524|GO:0016887|GO:0006810|GO:0016021|GO:0042626|GO:0055085|GO:0000166|GO:0017111	NULL	NULL
Dr02910	GO:0032259|GO:0008168|GO:0009451|GO:0006396	EC:2.1.1.0	trna (guanine-n -)-methyltransferase-like	IPR003358	tRNA (guanine-N-7) methyltransferase	GO:0006400|GO:0008176	NULL	UniPathway: UPA00989
Dr02916	GO:0046872|GO:0004784|GO:0009295|GO:0006801|GO:0009507|GO:0055114|GO:0009411	EC:1.15.1.1	superoxide dismutase	IPR001189|IPR019831|IPR019832	Manganese/iron superoxide dismutase|Manganese/iron superoxide dismutase, N-terminal|Manganese/iron superoxide dismutase, C-terminal	GO:0004784|GO:0006801|GO:0046872|GO:0055114	NULL	MetaCyc: PWY-6854
Dr02920	GO:0005739	NULL	pentatricopeptide repeat-containing protein	IPR002885|IPR011990	Pentatricopeptide repeat|Tetratricopeptide-like helical	GO:0005515	NULL	NULL
Dr02924	GO:0004715|GO:0006468|GO:0005524|GO:0004674|GO:0009069	EC:2.7.10.2|EC:2.7.11.0	serine threonine-protein kinase at5g01020-like	IPR001245|IPR011009|IPR000719|IPR017441|IPR008271	Serine-threonine/tyrosine-protein kinase catalytic domain|Protein kinase-like domain|Protein kinase domain|Protein kinase, ATP binding site|Serine/threonine-protein kinase, active site	GO:0004672|GO:0006468|GO:0016772|GO:0005524|GO:0004674	NULL	NULL
Dr02933	GO:0006979|GO:0009543|GO:0020037|GO:0004601|GO:0005634|GO:0009535|GO:0055114|GO:0006804	EC:1.11.1.7	thylakoid lumenal 29 kda chloroplastic-like	IPR002016|IPR010255|IPR002207	Haem peroxidase, plant/fungal/bacterial|Plant ascorbate peroxidase|Haem peroxidase	GO:0004601|GO:0006979|GO:0020037|GO:0055114	NULL	NULL
Dr02948	GO:0006306|GO:0008168	EC:2.1.1.0	chromomethylase 2	IPR001525|IPR023780|IPR001025|IPR016197|IPR000953|IPR018117|IPR023779	C-5 cytosine methyltransferase|Chromo domain|Bromo adjacent homology (BAH) domain|Chromo domain-like|Chromo domain/shadow|DNA methylase, C-5 cytosine-specific, active site|Chromo domain, conserved site	GO:0003677|GO:0006306|GO:0008168	EC:2.1.1.37	KEGG: 00270+2.1.1.37
Dr02961	GO:0003723|GO:0008270|GO:0005730|GO:0006364|GO:0008026|GO:0005524	NULL	rna helicase	IPR011545|IPR001650|IPR027417|IPR014001|IPR014014|IPR000629	DNA/RNA helicase, DEAD/DEAH box type, N-terminal|Helicase, C-terminal|P-loop containing nucleoside triphosphate hydrolase|Helicase, superfamily 1/2, ATP-binding domain|RNA helicase, DEAD-box type, Q motif|RNA helicase, ATP-dependent, DEAD-box, conserved site	GO:0003676|GO:0005524|GO:0008026|GO:0004386	NULL	NULL
Dr02976	GO:0016023	NULL	protein	IPR016024|IPR011989	Armadillo-type fold|Armadillo-like helical	GO:0005488	NULL	NULL
Dr02978	GO:0046872|GO:0009536	NULL	ring finger	IPR002867|IPR006575|IPR001841|IPR016135|IPR013083|IPR017907	Zinc finger, C6HC-type|RWD domain|Zinc finger, RING-type|Ubiquitin-conjugating enzyme/RWD-like|Zinc finger, RING/FYVE/PHD-type|Zinc finger, RING-type, conserved site	GO:0008270|GO:0005515	NULL	NULL
Dr02995	GO:0044425	NULL	uncharacterized protein at4g17910-like	IPR009447	GWT1	GO:0005789|GO:0006506|GO:0016021|GO:0016746	EC:2.3.-.-	KEGG: 00231+2.3.-.-|KEGG: 00563+2.3.-.-|UniPathway: UPA00196
Dr03022	NULL	NULL	NULL	IPR018996	Inner nuclear membrane protein MAN1	GO:0005639	NULL	NULL
Dr03030	GO:0016020|GO:0009536	NULL	probable dolichyl pyrophosphate glc1man9 c2 alpha- -glucosyltransferase-like	IPR004856	Glycosyl transferase, ALG6/ALG8	GO:0005789|GO:0016758	NULL	Reactome: REACT_17015|UniPathway: UPA00378
Dr03043	GO:0000256|GO:0016023|GO:0071522	NULL	glyoxylate induced protein	IPR013096|IPR011051|IPR014710	Cupin 2, conserved barrel|RmlC-like cupin domain|RmlC-like jelly roll fold	NULL	NULL	NULL
Dr03012	GO:0046786	NULL	tobamovirus multiplication 2b protein	NULL	NULL	NULL	NULL	NULL
Dr03044	GO:0016070|GO:0032259|GO:0008168	EC:2.1.1.0	trna rrna methyltransferase family protein	IPR001537|IPR016024	tRNA/rRNA methyltransferase, SpoU|Armadillo-type fold	GO:0003723|GO:0006396|GO:0008173|GO:0005488	NULL	NULL
Dr03120	GO:0006457|GO:0009941|GO:0009570|GO:0016853|GO:0015031	NULL	trigger factor-like	IPR001179|IPR008881|IPR008880|IPR027304|IPR005215	Peptidyl-prolyl cis-trans isomerase, FKBP-type, domain|Trigger factor, ribosome-binding, bacterial|Trigger factor, C-terminal domain|Trigger factor/SurA domain|Trigger factor	GO:0006457|GO:0015031	NULL	NULL
Dr03123	GO:0016787|GO:1901363|GO:0097159|GO:0005739	NULL	dead-box atp-dependent rna helicase 22	IPR011545|IPR001650|IPR027417|IPR014001|IPR014014	DNA/RNA helicase, DEAD/DEAH box type, N-terminal|Helicase, C-terminal|P-loop containing nucleoside triphosphate hydrolase|Helicase, superfamily 1/2, ATP-binding domain|RNA helicase, DEAD-box type, Q motif	GO:0003676|GO:0005524|GO:0008026|GO:0004386	NULL	NULL
Dr03058	NULL	NULL	NULL	IPR016135|IPR013083|IPR001841|IPR006575	Ubiquitin-conjugating enzyme/RWD-like|Zinc finger, RING/FYVE/PHD-type|Zinc finger, RING-type|RWD domain	GO:0005515|GO:0008270	NULL	NULL
Dr03097	GO:0016117|GO:0016705|GO:0009507	NULL	lycopene beta epsilon cyclase protein	NULL	NULL	NULL	NULL	NULL
Dr03039	GO:0006457|GO:0006979|GO:0000014|GO:0090305|GO:0009314|GO:0003677|GO:0000724|GO:0006289|GO:0000413|GO:0003755|GO:0006308	EC:5.2.1.8	dna repair endonuclease uvh1	IPR006166|IPR010994|IPR011335|IPR020819	ERCC4 domain|RuvA domain 2-like|Restriction endonuclease type II-like|DNA repair nuclease, XPF-type/Helicase	GO:0003677|GO:0004518|GO:0006259	NULL	Reactome: REACT_216
Dr03114	GO:0004553|GO:0009941|GO:0005975|GO:0019031|GO:0005739	EC:3.2.1.0	protein nlrc3-like	IPR003590	Leucine-rich repeat, ribonuclease inhibitor subtype	NULL	NULL	NULL
Dr03115	GO:0006506|GO:0005739|GO:0016740|GO:0005789	NULL	gpi ethanolamine phosphate transferase 1-like	IPR007070|IPR024956|IPR017852|IPR017850|IPR017849	GPI ethanolamine phosphate transferase 1|tRNAHis guanylyltransferase catalytic domain|GPI ethanolamine phosphate transferase 1, C-terminal|Alkaline-phosphatase-like, core domain|Alkaline phosphatase-like, alpha/beta/alpha	GO:0005789|GO:0006506|GO:0016740|GO:0000287|GO:0006400|GO:0008193|GO:0003824|GO:0008152	EC:2.-.-.-	KEGG: 00231+2.-.-.-|UniPathway: UPA00196
Dr03054	GO:0016023|GO:0006468|GO:0005524|GO:0004674|GO:0009069	EC:2.7.11.0	kinase like protein	IPR000719|IPR011009|IPR002290|IPR008271	Protein kinase domain|Protein kinase-like domain|Serine/threonine- / dual specificity protein kinase, catalytic domain|Serine/threonine-protein kinase, active site	GO:0004672|GO:0005524|GO:0006468|GO:0016772|GO:0004674	NULL	NULL
Dr03056	NULL	NULL	NULL	NULL	NULL	NULL	NULL	NULL
Dr03095	GO:1901700|GO:0010033|GO:0009719|GO:0008270	NULL	zinc finger an1 domain-containing stress-associated protein 12	IPR000058	Zinc finger, AN1-type	GO:0008270	NULL	NULL
Dr03128	GO:0009793|GO:0005739|GO:0009536	NULL	ankyrin repeat domain-containing protein emb506	IPR020683|IPR002110	Ankyrin repeat-containing domain|Ankyrin repeat	GO:0005515	NULL	NULL
Dr03149	GO:0071277|GO:0090333|GO:0009535|GO:0005739	NULL	extracellular calcium sensing receptor	IPR001763	Rhodanese-like domain	NULL	NULL	NULL
Dr03164	NULL	NULL	NULL	IPR008985	Concanavalin A-like lectin/glucanases superfamily	NULL	NULL	NULL
Dr03165	GO:0009987|GO:0050896|GO:0009536|GO:0016740	NULL	dna repair protein rev1	IPR001357|IPR001126|IPR017956|IPR024728|IPR017961|IPR017963	BRCT domain|DNA-repair protein, UmuC-like|AT hook, DNA-binding motif|DNA polymerase type-Y, HhH motif|DNA polymerase, Y-family, little finger domain|DNA-repair protein, UmuC-like, N-terminal	GO:0003684|GO:0003887|GO:0006281|GO:0003677	EC:2.7.7.7	KEGG: 00230+2.7.7.7|KEGG: 00240+2.7.7.7
Dr03170	NULL	NULL	NULL	IPR001810	F-box domain	GO:0005515	NULL	NULL
Dr03188	GO:0071704|GO:0044249|GO:0044710|GO:0010584|GO:0015645|GO:0016491|GO:0000166	NULL	acyl:coa ligase	IPR000873|IPR025110|IPR020845	AMP-dependent synthetase/ligase|AMP-binding enzyme C-terminal domain|AMP-binding, conserved site	GO:0003824|GO:0008152	NULL	NULL
Dr03194	NULL	NULL	NULL	NULL	NULL	NULL	NULL	NULL
Dr03134	GO:0005524|GO:0000186|GO:0004709|GO:0007178|GO:0009069	EC:2.7.11.25	serine threonine-protein kinase pbs1-like	IPR000719|IPR011009|IPR013320|IPR002290|IPR017441|IPR008271	Protein kinase domain|Protein kinase-like domain|Concanavalin A-like lectin/glucanase, subgroup|Serine/threonine- / dual specificity protein kinase, catalytic domain|Protein kinase, ATP binding site|Serine/threonine-protein kinase, active site	GO:0004672|GO:0005524|GO:0006468|GO:0016772|GO:0004674	NULL	NULL
Dr03300	NULL	NULL	NULL	IPR001378|IPR023370	Uncharacterised domain UPF0066|Uncharacterised domain UPF0066, YaeB-like domain	NULL	NULL	NULL
Dr03229	GO:0016023	NULL	probable inactive purple acid phosphatase 28-like	IPR004843|IPR011230	Phosphoesterase domain|Phosphoesterase At2g46880	GO:0016787	NULL	NULL
Dr03206	GO:0051082|GO:0031072|GO:0009536	NULL	chaperone protein dnaj-related protein	NULL	NULL	NULL	NULL	NULL
Dr03267	NULL	NULL	NULL	IPR007720	N-acetylglucosaminyl transferase component	GO:0006506|GO:0016021|GO:0017176	NULL	UniPathway: UPA00196
Dr03168	GO:0017111|GO:0005739|GO:0000166	EC:3.6.1.15	aaa-type atpase family protein	IPR003959|IPR027417|IPR003593|IPR003960	ATPase, AAA-type, core|P-loop containing nucleoside triphosphate hydrolase|AAA+ ATPase domain|ATPase, AAA-type, conserved site	GO:0005524|GO:0000166|GO:0017111	NULL	NULL
Dr03212	GO:0009555|GO:0010491|GO:0046398|GO:0046686|GO:0047338|GO:0017103|GO:0047350|GO:0052573|GO:0033356|GO:0006011|GO:0003983|GO:0005982|GO:0005985|GO:0006012	EC:2.7.7.11|EC:2.7.7.10|EC:2.7.7.44|EC:2.7.7.9	udp-sugar pyrophosphorylase	IPR002618	UTP--glucose-1-phosphate uridylyltransferase	GO:0008152|GO:0016779	NULL	NULL
Dr03198	GO:0009536	NULL	pentatricopeptide repeat protein	IPR002885	Pentatricopeptide repeat	NULL	NULL	NULL
Dr03202	GO:0003676|GO:0008026|GO:0005524|GO:0010093	NULL	superkiller viralicidic activity 2-like 2-like	IPR011545|IPR001650|IPR012961|IPR025696|IPR027417|IPR014001|IPR016438	DNA/RNA helicase, DEAD/DEAH box type, N-terminal|Helicase, C-terminal|DSH, C-terminal|rRNA-processing arch domain|P-loop containing nucleoside triphosphate hydrolase|Helicase, superfamily 1/2, ATP-binding domain|RNA helicase, ATP-dependent, SK12/DOB1	GO:0003676|GO:0005524|GO:0008026|GO:0004386|GO:0016818|GO:0016817	NULL	NULL
Dr03218	GO:0005840|GO:0003735|GO:0006412|GO:0009536|GO:0005739|GO:0042254	NULL	30s ribosomal protein s16	IPR000307|IPR023803	Ribosomal protein S16|Ribosomal protein S16 domain	GO:0003735|GO:0005622|GO:0005840|GO:0006412	NULL	NULL
Dr03307	GO:0046872|GO:0044237|GO:0003824|GO:0005739	NULL	ankyrin repeat-rich protein	IPR020683|IPR013083|IPR002110|IPR001841|IPR017907	Ankyrin repeat-containing domain|Ankyrin repeat|Zinc finger, RING/FYVE/PHD-type|Zinc finger, RING-type|Zinc finger, RING-type, conserved site	GO:0005515|GO:0008270	NULL	NULL
Dr03308	GO:0009507|GO:0016740	NULL	gcn5-related n-acetyltransferase family protein	IPR016181	Acyl-CoA N-acyltransferase	NULL	NULL	NULL
Dr03327	GO:0051536|GO:0009941|GO:0004497|GO:0015031|GO:0016020	NULL	rieske iron-sulfur protein tic55	IPR017941|IPR013626	Rieske [2Fe-2S] iron-sulphur domain|Pheophorbide a oxygenase	GO:0016491|GO:0051537|GO:0055114|GO:0010277	NULL	NULL
Dr03340	GO:0016491|GO:0016023|GO:0016310|GO:0004672|GO:0016020|GO:0000166	NULL	leucine-rich repeat receptor-like serine threonine-protein kinase at2g24130-like	IPR000719|IPR001611|IPR013210|IPR025875|IPR011009|IPR013320|IPR002290|IPR003591|IPR017441|IPR008271	Protein kinase domain|Leucine-rich repeat|Leucine-rich repeat-containing N-terminal, type 2|Leucine rich repeat 4|Protein kinase-like domain|Concanavalin A-like lectin/glucanase, subgroup|Serine/threonine- / dual specificity protein kinase, catalytic domain|Leucine-rich repeat, typical subtype|Protein kinase, ATP binding site|Serine/threonine-protein kinase, active site	GO:0004672|GO:0005524|GO:0006468|GO:0005515|GO:0016772|GO:0004674	NULL	NULL
Dr03358	GO:0005739|GO:0009536	NULL	protein	IPR002885|IPR011990	Pentatricopeptide repeat|Tetratricopeptide-like helical	GO:0005515	NULL	NULL
Dr03375	GO:0005885|GO:0034314	NULL	actin-related protein c3	IPR007204	ARP2/3 complex, 21kDa subunit (p21-Arc)	GO:0005856|GO:0005885|GO:0030833|GO:0034314	NULL	NULL
Dr03322	GO:0000045|GO:0000421|GO:0034045|GO:0080025|GO:0005829|GO:0032266	NULL	autophagy-related protein 18-like	IPR001680|IPR017986|IPR015943	WD40 repeat|WD40-repeat-containing domain|WD40/YVTN repeat-like-containing domain	GO:0005515	NULL	NULL
Dr03359	GO:0004185|GO:0005615|GO:0006508|GO:0016023|GO:0009742	EC:3.4.16.0	protein	IPR001563|IPR018202	Peptidase S10, serine carboxypeptidase|Peptidase S10, serine carboxypeptidase, active site	GO:0004185|GO:0006508	NULL	NULL
Dr03367	GO:0004129|GO:0005739|GO:0006123|GO:0015992|GO:0045277	EC:1.9.3.1	cytochrome c subunit vib family protein	IPR003213	Cytochrome c oxidase, subunit VIb	GO:0004129|GO:0005739	NULL	NULL
Dr03379	NULL	NULL	NULL	NULL	NULL	NULL	NULL	NULL
Dr03380	GO:0016301	NULL	phosphoinositide 3-kinase regulatory subunit 4-like	IPR000719|IPR001680|IPR000357|IPR016024|IPR017986|IPR011009|IPR011989|IPR015943|IPR002290|IPR021133|IPR008271	Protein kinase domain|WD40 repeat|HEAT|Armadillo-type fold|WD40-repeat-containing domain|Protein kinase-like domain|Armadillo-like helical|WD40/YVTN repeat-like-containing domain|Serine/threonine- / dual specificity protein kinase, catalytic domain|HEAT, type 2|Serine/threonine-protein kinase, active site	GO:0004672|GO:0005524|GO:0006468|GO:0005515|GO:0005488|GO:0016772|GO:0004674	NULL	NULL
Dr03383	GO:0005509	NULL	dcn1-like protein 4	IPR014764|IPR005176|IPR011992	Defective-in-cullin neddylation protein|Potentiating neddylation domain|EF-hand domain pair	GO:0005509	NULL	NULL
Dr03387	GO:0022891|GO:0016021|GO:0005886|GO:0055085|GO:0008643	NULL	hexose transporter	IPR005828|IPR016196|IPR003663|IPR020846|IPR005829	General substrate transporter|Sugar/inositol transporter|Major facilitator superfamily domain, general substrate transporter|Major facilitator superfamily domain|Sugar transporter, conserved site	GO:0016021|GO:0022857|GO:0055085|GO:0016020|GO:0022891|GO:0005215|GO:0006810	NULL	Reactome: REACT_15518
Dr03399	GO:0009508|GO:0009570	NULL	cobw domain-containing protein 2-like isoform 2	IPR003495|IPR011629|IPR027417	CobW/HypB/UreG domain|Cobalamin (vitamin B12) biosynthesis CobW-like, C-terminal|P-loop containing nucleoside triphosphate hydrolase	NULL	NULL	NULL
Dr03404	GO:0005515|GO:0006950|GO:0043167|GO:0009507	NULL	molecular chaperone hsp40 -like protein	IPR001623|IPR001305|IPR002939|IPR008971|IPR012724	DnaJ domain|Heat shock protein DnaJ, cysteine-rich domain|Chaperone DnaJ, C-terminal|HSP40/DnaJ peptide-binding|Chaperone DnaJ	GO:0031072|GO:0051082|GO:0006457|GO:0005524|GO:0009408	NULL	NULL
Dr03405	GO:0005681|GO:0016023|GO:0000398|GO:0009507|GO:0016020	NULL	pre-mrna-processing-splicing factor	IPR027652|IPR012591|IPR012592|IPR019580|IPR019581|IPR019582|IPR012337	Pre-mRNA-processing-splicing factor 8|PRO8NT domain|PROCN domain|Pre-mRNA-processing-splicing factor 8, U6-snRNA-binding|Pre-mRNA-processing-splicing factor 8, U5-snRNA-binding|RNA recognition motif, spliceosomal PrP8|Ribonuclease H-like domain	GO:0000398|GO:0005681|GO:0017070|GO:0030623|GO:0003723|GO:0003676	NULL	NULL
Dr03408	GO:0009411|GO:0010332|GO:0090305|GO:0043231|GO:0006259|GO:0007049|GO:0003677|GO:0004518|GO:0009644	NULL	essential meiotic endonuclease 1a	IPR006166	ERCC4 domain	GO:0003677|GO:0004518	NULL	NULL
Dr03413	GO:0070652|GO:0051225	NULL	haus augmin-like complex subunit 3-like	IPR026206	HAUS augmin-like complex subunit 3	GO:0051225|GO:0070652	NULL	NULL
Dr03414	GO:0003964|GO:0006278|GO:0003723|GO:0005634|GO:0009536	EC:2.7.7.49	protein	NULL	NULL	NULL	NULL	NULL
Dr03447	GO:0006353|GO:0003723|GO:0009507|GO:0006355	NULL	antitermination domain-containing protein	IPR011605|IPR006027	NusB antitermination factor|NusB/RsmB/TIM44	GO:0006353|GO:0003723|GO:0006355	NULL	NULL
Dr03453	GO:0009536|GO:0016020	NULL	uncharacterized protein	IPR019358	Transmembrane protein 194	NULL	NULL	NULL
Dr03454	GO:0009416|GO:0010027|GO:0004222|GO:0006508|GO:0009658|GO:0009959|GO:0010207|GO:0009723|GO:0009507|GO:0048564|GO:0016020	EC:3.4.24.0	protein	IPR008915	Peptidase M50	GO:0004222|GO:0006508	NULL	NULL
Dr03455	GO:0016023|GO:0008152|GO:0016020|GO:0016772	NULL	leucine-rich repeat protein kinase-like protein	IPR000719|IPR011009|IPR013320	Protein kinase domain|Protein kinase-like domain|Concanavalin A-like lectin/glucanase, subgroup	GO:0004672|GO:0005524|GO:0006468|GO:0016772	NULL	NULL
Dr03392	NULL	NULL	NULL	IPR008709	Neurochondrin	NULL	NULL	NULL
Dr03429	NULL	NULL	NULL	IPR019142	Dymeclin	NULL	NULL	NULL
Dr03520	NULL	NULL	NULL	IPR010369	Protein of unknown function DUF966	NULL	NULL	NULL
Dr03530	GO:0044464	NULL	exocyst complex component 84b	IPR016159	Cullin repeat-like-containing domain	NULL	NULL	NULL
Dr03533	GO:0016023	NULL	thaumatin-like protein	IPR001938	Thaumatin	NULL	NULL	NULL
Dr03545	NULL	NULL	NULL	IPR026111|IPR027817	Actin-binding Rho-activating protein/Costars protein|Costars domain	NULL	NULL	NULL
Dr03451	GO:0006260|GO:0003677|GO:0009793|GO:0005524|GO:0017111	EC:3.6.1.15	replication factor c subunit 3-like	IPR013748|IPR008921|IPR027417|IPR003593	Replication factor C, C-terminal domain|DNA polymerase III, clamp loader complex, gamma/delta/delta subunit, C-terminal|P-loop containing nucleoside triphosphate hydrolase|AAA+ ATPase domain	GO:0003677|GO:0006260|GO:0000166|GO:0017111	NULL	Reactome: REACT_152|Reactome: REACT_1538|Reactome: REACT_216|Reactome: REACT_22172|Reactome: REACT_383
Dr03463	GO:0009536	NULL	ankyrin repeat and regulator of chromosome condensation domain-containing protein	IPR000408|IPR020683|IPR009091|IPR002110	Regulator of chromosome condensation, RCC1|Ankyrin repeat-containing domain|Regulator of chromosome condensation 1/beta-lactamase-inhibitor protein II|Ankyrin repeat	GO:0005515	NULL	NULL
Dr03470	NULL	NULL	NULL	IPR019369|IPR002052	DNA methylase, N-6 adenine-specific, eukaryotic|DNA methylase, N-6 adenine-specific, conserved site	GO:0003676|GO:0008168|GO:0032259	NULL	NULL
Dr03471	GO:0005622	NULL	histone deacetylase	IPR000286|IPR023801|IPR001876	Histone deacetylase superfamily|Histone deacetylase domain|Zinc finger, RanBP2-type	GO:0008270	NULL	NULL
Dr03437	GO:0009536	NULL	nuclear pore complex protein	IPR019321|IPR019366|IPR017986	Nucleoporin Nup88|Clusterin-associated protein-1|WD40-repeat-containing domain	GO:0005515	NULL	NULL
Dr03500	NULL	NULL	NULL	NULL	NULL	NULL	NULL	NULL
Dr03509	GO:0006457|GO:0005528|GO:0005886|GO:0048366|GO:0000413|GO:0003755|GO:0005516	EC:5.2.1.8	42 kda peptidyl-prolyl isomerase	IPR023566|IPR001179|IPR000058|IPR011990|IPR019734|IPR015880|IPR007087|IPR013026	Peptidyl-prolyl cis-trans isomerase, FKBP-type|Peptidyl-prolyl cis-trans isomerase, FKBP-type, domain|Zinc finger, AN1-type|Tetratricopeptide-like helical|Tetratricopeptide repeat|Zinc finger, C2H2-like|Zinc finger, C2H2|Tetratricopeptide repeat-containing domain	GO:0006457|GO:0008270|GO:0005515|GO:0046872	NULL	NULL
Dr03519	GO:0008152|GO:0016787|GO:0009536	NULL	alpha beta fold family protein	IPR000073	Alpha/beta hydrolase fold-1	NULL	NULL	NULL
Dr03438	NULL	NULL	NULL	IPR011430|IPR016024|IPR011989	Down-regulated-in-metastasis protein|Armadillo-type fold|Armadillo-like helical	GO:0005488	NULL	NULL
Dr03523	GO:0008643|GO:0016020	NULL	major facilitator protein	NULL	NULL	NULL	NULL	NULL
Dr03560	NULL	NULL	NULL	IPR010625|IPR009069	CHCH|Cysteine alpha-hairpin motif superfamily	NULL	NULL	NULL
Dr03464	GO:0048316|GO:0005739|GO:0004827|GO:0010109|GO:0009553|GO:0048481|GO:0005524|GO:0009570|GO:0006433|GO:0006525|GO:0006560	EC:6.1.1.15	prolyl-trna synthetase	IPR004499|IPR002314|IPR004154|IPR016061|IPR017449|IPR002316|IPR006195	Proline-tRNA ligase, class IIa, archaeal-type|Aminoacyl-tRNA synthetase, class II (G/ H/ P/ S), conserved domain|Anticodon-binding|Proline-tRNA ligase, class II, C-terminal|Proline-tRNA ligase, class IIa|Prolyl-tRNA synthetase, class II|Aminoacyl-tRNA synthetase, class II	GO:0004827|GO:0005524|GO:0005737|GO:0006433|GO:0000166|GO:0004812|GO:0006418	EC:6.1.1.15	KEGG: 00970+6.1.1.15|Reactome: REACT_71
Dr03468	GO:0006468|GO:0005524|GO:0004674|GO:0009536|GO:0009069	EC:2.7.11.0	tousled-like kinase	IPR027085|IPR000719|IPR011009|IPR002290|IPR017441|IPR008271	Serine/threonine-protein kinase TOUSLED|Protein kinase domain|Protein kinase-like domain|Serine/threonine- / dual specificity protein kinase, catalytic domain|Protein kinase, ATP binding site|Serine/threonine-protein kinase, active site	GO:0004674|GO:0004672|GO:0005524|GO:0006468|GO:0016772	NULL	NULL
Dr03479	NULL	NULL	NULL	NULL	NULL	NULL	NULL	NULL
Dr03491	GO:0009536	NULL	uncharacterized protein	IPR024420|IPR011990	TRAPP III complex, Trs85|Tetratricopeptide-like helical	GO:0005515	NULL	NULL
Dr03495	NULL	NULL	NULL	IPR006076	FAD dependent oxidoreductase	GO:0016491|GO:0055114	NULL	NULL
Dr03562	GO:0009706	NULL	hpp integral membrane domain-containing protein	IPR007065	HPP	NULL	NULL	NULL
Dr03563	GO:0004527|GO:0090305|GO:0003677|GO:0005634|GO:0006281	NULL	exonuclease 1-like	IPR006084|IPR006085|IPR006086|IPR020045|IPR008918	XPG/Rad2 endonuclease|XPG N-terminal|XPG-I domain|5'-3' exonuclease, C-terminal domain|Helix-hairpin-helix motif, class 2	GO:0004518|GO:0006281|GO:0003677|GO:0003824	NULL	NULL
Dr03568	GO:0004725|GO:0035335|GO:0006570	EC:3.1.3.48	magnesium-dependent phosphatase	IPR024734|IPR010036|IPR023214|IPR010033	Magnesium-dependent phosphatase-1, eukaryotic type|Magnesium-dependent phosphatase-1, eukaryotic/arcaheal type|HAD-like domain|HAD-superfamily phosphatase, subfamily IIIC	GO:0016791	NULL	NULL
Dr03573	GO:0005739	NULL	protein	NULL	NULL	NULL	NULL	NULL
Dr03575	GO:0005739	NULL	trichome birefringence-like 13 protein	IPR026057|IPR025846	PC-Esterase|PMR5 N-terminal domain	NULL	NULL	NULL
Dr03576	GO:0046872|GO:0006979|GO:0016023|GO:0020037|GO:0004601|GO:0055114|GO:0006804	EC:1.11.1.7	peroxidase 7-like	IPR002016|IPR010255|IPR000823|IPR019793|IPR019794	Haem peroxidase, plant/fungal/bacterial|Plant peroxidase|Haem peroxidase|Peroxidases heam-ligand binding site|Peroxidase, active site	GO:0004601|GO:0006979|GO:0020037|GO:0055114	EC:1.11.1.7	KEGG: 00360+1.11.1.7|KEGG: 00940+1.11.1.7|MetaCyc: PWY-5461|MetaCyc: PWY-7214
Dr03589	GO:0000064|GO:0005290|GO:0015189|GO:0015817|GO:0015181|GO:0015822|GO:0016021|GO:0015819|GO:0005739|GO:0015809	NULL	mitochondrial substrate carrier family protein	IPR018108|IPR023395	Mitochondrial substrate/solute carrier|Mitochondrial carrier domain	NULL	NULL	NULL
Dr03592	NULL	NULL	NULL	NULL	NULL	NULL	NULL	NULL
Dr03603	GO:0004527|GO:0044237|GO:1901363|GO:0097159	NULL	rrp6-like protein 3	IPR002121|IPR002562|IPR010997|IPR012337	HRDC domain|3'-5' exonuclease domain|HRDC-like|Ribonuclease H-like domain	GO:0003676|GO:0005622|GO:0006139|GO:0008408|GO:0000166|GO:0003824|GO:0044237	NULL	NULL
Dr03622	NULL	NULL	NULL	IPR028222|IPR016024	AP-5 complex subunit zeta-1|Armadillo-type fold	GO:0044599|GO:0005488	NULL	NULL
Dr03722	GO:0016023|GO:0008374|GO:0042967	NULL	lecithin-cholesterol acyltransferase-like 1	IPR003386	Lecithin:cholesterol/phospholipid:diacylglycerol acyltransferase	GO:0006629|GO:0008374	NULL	NULL
Dr03561	GO:0005507|GO:0005739|GO:0055114|GO:0004491|GO:0006979|GO:0006020|GO:0006550|GO:0006552|GO:0006574	EC:1.2.1.27	methylmalonate-semialdehyde dehydrogenase	IPR010061|IPR015590|IPR016161|IPR016163|IPR016162|IPR016160	Methylmalonate-semialdehyde dehydrogenase|Aldehyde dehydrogenase domain|Aldehyde/histidinol dehydrogenase|Aldehyde dehydrogenase, C-terminal|Aldehyde dehydrogenase, N-terminal|Aldehyde dehydrogenase, conserved site	GO:0004491|GO:0055114|GO:0008152|GO:0016491|GO:0016620	EC:1.2.1.27|EC:1.2.1.18|EC:1.2.1.18+1.2.1.27	KEGG: 00280+1.2.1.27|KEGG: 00410+1.2.1.18|KEGG: 00562+1.2.1.18|KEGG: 00640+1.2.1.18+1.2.1.27|MetaCyc: PWY-5642|MetaCyc: PWY-6373
Dr03586	GO:0009941|GO:0008508|GO:0016021|GO:0006814|GO:0015721	NULL	uncharacterized sodium-dependent transporter yocs-like	IPR002657	Bile acid:sodium symporter	GO:0006814|GO:0008508|GO:0016020	NULL	NULL
Dr03594	GO:0000325|GO:0015079|GO:0005886|GO:0071805|GO:0005774	NULL	potassium transporter 7-like	IPR003855	K+ potassium transporter	GO:0015079|GO:0016020|GO:0071805	NULL	NULL
Dr03604	GO:0006281|GO:0005777|GO:0009414|GO:0009965|GO:0016567|GO:0009791|GO:0000166|GO:0003824|GO:0009734|GO:0005634	NULL	nedd8-activating enzyme e1 regulatory subunit	IPR000594|IPR009036|IPR016040	UBA/THIF-type NAD/FAD binding fold|Molybdenum cofactor biosynthesis, MoeB|NAD(P)-binding domain	GO:0003824	NULL	NULL
Dr03608	GO:0004386|GO:0003676|GO:0000166	NULL	dead-box atp-dependent rna helicase 32	IPR011545|IPR001650|IPR025313|IPR027417|IPR014001|IPR014014	DNA/RNA helicase, DEAD/DEAH box type, N-terminal|Helicase, C-terminal|Domain of unknown function DUF4217|P-loop containing nucleoside triphosphate hydrolase|Helicase, superfamily 1/2, ATP-binding domain|RNA helicase, DEAD-box type, Q motif	GO:0003676|GO:0005524|GO:0008026|GO:0004386	NULL	NULL
Dr03611	NULL	NULL	NULL	IPR001715|IPR000048|IPR016024|IPR027417|IPR011989	Calponin homology domain|IQ motif, EF-hand binding site|Armadillo-type fold|P-loop containing nucleoside triphosphate hydrolase|Armadillo-like helical	GO:0005515|GO:0005488	NULL	NULL
Dr03615	GO:0008017|GO:0010005|GO:0009826|GO:0007275|GO:0010031|GO:0045298	NULL	microtubule-associated protein tortifolia1	IPR016024|IPR011989	Armadillo-type fold|Armadillo-like helical	GO:0005488	NULL	NULL
Dr03625	NULL	NULL	NULL	IPR019153	DDRGK domain containing protein	NULL	NULL	NULL
Dr03629	GO:0005783|GO:0004366|GO:0005886|GO:0042967|GO:0046486	EC:2.3.1.15	glycerol-3-phosphate acyltransferase	IPR002123	Phospholipid/glycerol acyltransferase	GO:0008152|GO:0016746	NULL	NULL
Dr03720	GO:0016020|GO:0004222|GO:0007155|GO:0006508|GO:0008270	EC:3.4.24.0	major surface like glycoprotein	IPR001577|IPR013111|IPR020067|IPR000742|IPR013032	Peptidase M8, leishmanolysin|EGF-like domain, extracellular|Frizzled domain|Epidermal growth factor-like domain|EGF-like, conserved site	GO:0004222|GO:0006508|GO:0007155|GO:0016020|GO:0005515	NULL	NULL
Dr14972	GO:0044238|GO:0034645|GO:0010467	NULL	suppressor of	IPR005100|IPR006645|IPR005824	Transcription elongation factor Spt5, NGN domain|Transcription antitermination protein NusG, N-terminal domain|KOW	GO:0006355	NULL	NULL
Dr14963	GO:0017183|GO:0004164|GO:0032259|GO:0046489	EC:2.1.1.98	diphthine synthase	IPR000878|IPR014776|IPR014777|IPR004551	Tetrapyrrole methylase|Tetrapyrrole methylase, subdomain 2|Tetrapyrrole methylase, subdomain 1|Diphthine synthase	GO:0008152|GO:0008168|GO:0004164|GO:0017183	NULL	UniPathway: UPA00559
Dr14964	GO:0009536	NULL	uncharacterized protein c19orf29 homolog	IPR019134|IPR018816	Cactin C-terminal domain|Cactin, domain	GO:0005515	NULL	NULL
Dr14970	GO:0016023|GO:0009505|GO:0006508|GO:0004190	EC:3.4.23.0	aspartic proteinase-like protein 2-like	IPR001461|IPR021109	Aspartic peptidase|Aspartic peptidase domain	GO:0004190|GO:0006508	NULL	NULL
Dr14994	GO:0016020|GO:0009536	NULL	tyrosine-specific transport	IPR018227	Tryptophan/tyrosine permease	GO:0003333	NULL	NULL
Dr14998	NULL	NULL	NULL	IPR002885|IPR011990	Pentatricopeptide repeat|Tetratricopeptide-like helical	GO:0005515	NULL	NULL
Dr14999	GO:0000025|GO:0004134|GO:0010297|GO:2001070|GO:0005829|GO:0005982|GO:0005985	EC:2.4.1.25	4-alpha-glucanotransferase	IPR002044|IPR003385|IPR013784|IPR017853|IPR013783|IPR013781	Carbohydrate binding module family 20|Glycoside hydrolase, family 77|Carbohydrate-binding-like fold|Glycoside hydrolase, superfamily|Immunoglobulin-like fold|Glycoside hydrolase, catalytic domain	GO:2001070|GO:0004134|GO:0005975|GO:0030246|GO:0003824	EC:2.4.1.25	KEGG: 00500+2.4.1.25|MetaCyc: PWY-5941|MetaCyc: PWY-6724|MetaCyc: PWY-6737|MetaCyc: PWY-7238
Dr14979	NULL	NULL	NULL	NULL	NULL	NULL	NULL	NULL
Dr15016	GO:0009536|GO:0016020	NULL	probable serine incorporator-like	IPR005016	TMS membrane protein/tumour differentially expressed protein	GO:0016020	NULL	NULL
Dr15030	NULL	NULL	NULL	IPR006121	Heavy metal-associated domain, HMA	GO:0030001|GO:0046872	NULL	NULL
Dr15039	GO:0006783|GO:0004659|GO:0016020|GO:0005739	NULL	protoheme ix farnesyltransferase	IPR000537|IPR006369	UbiA prenyltransferase family|Protohaem IX farnesyltransferase	GO:0004659|GO:0016021|GO:0008495|GO:0048034	EC:2.5.1.-	KEGG: 00130+2.5.1.-|KEGG: 00270+2.5.1.-|KEGG: 00361+2.5.1.-|KEGG: 00380+2.5.1.-|KEGG: 00860+2.5.1.-|KEGG: 00920+2.5.1.-|KEGG: 00130+2.5.1.-|KEGG: 00270+2.5.1.-|KEGG: 00361+2.5.1.-|KEGG: 00380+2.5.1.-|KEGG: 00860+2.5.1.-|KEGG: 00920+2.5.1.-|UniPathway: UPA00834
Dr15055	GO:0042594|GO:0006623|GO:0009660|GO:0009536|GO:0051301|GO:0005774|GO:0005770|GO:0009959|GO:0005802|GO:0007033|GO:0007032|GO:0005783|GO:0009793	NULL	dnaj homolog subfamily c member 13-like	IPR001623|IPR025640|IPR016024|IPR011989	DnaJ domain|Domain of unknown function DUF4339|Armadillo-type fold|Armadillo-like helical	GO:0005488	NULL	NULL
Dr15058	GO:0016310|GO:0004765|GO:0005524|GO:0009507|GO:0000162|GO:0006571|GO:0009094	EC:2.7.1.71	shikimate kinase-like protein	IPR007052|IPR008978	CS domain|HSP20-like chaperone	NULL	NULL	NULL
Dr15070	GO:0004610|GO:0050896|GO:0005829|GO:0005739|GO:0046872|GO:0005975|GO:0006048	EC:5.4.2.3	phosphoacetylglucosamine mutase	IPR016657|IPR005843|IPR005844|IPR005845|IPR005846|IPR016055|IPR016066	Phosphoacetylglucosamine mutase|Alpha-D-phosphohexomutase, C-terminal|Alpha-D-phosphohexomutase, alpha/beta/alpha domain I|Alpha-D-phosphohexomutase, alpha/beta/alpha domain II|Alpha-D-phosphohexomutase, alpha/beta/alpha domain III|Alpha-D-phosphohexomutase, alpha/beta/alpha I/II/III|Alpha-D-phosphohexomutase, conserved site	GO:0004610|GO:0005975|GO:0016868|GO:0000287	EC:5.4.2.3|EC:5.4.2.10	KEGG: 00520+5.4.2.3|MetaCyc: PWY-5514|MetaCyc: PWY-6906|UniPathway: UPA00113|KEGG: 00520+5.4.2.10|MetaCyc: PWY-6749
Dr15087	GO:0010189|GO:0050342|GO:0032259|GO:0009507	EC:2.1.1.95	gamma-tocopherol methyltransferase	IPR013216|IPR025774	Methyltransferase type 11|Tocopherol O-methyltransferase	GO:0008152|GO:0008168	EC:2.1.1.95	KEGG: 00130+2.1.1.95|MetaCyc: PWY-1422|UniPathway: UPA00160
Dr15094	GO:0006457|GO:0046872|GO:0051082|GO:0031072|GO:0009536	NULL	uncharacterized protein	NULL	NULL	NULL	NULL	NULL
Dr15098	GO:0000377|GO:0009536	NULL	pentatricopeptide repeat-containing protein	IPR002885|IPR004860|IPR027434|IPR011990	Pentatricopeptide repeat|Homing endonuclease, LAGLIDADG|Homing endonuclease|Tetratricopeptide-like helical	GO:0004519|GO:0005515	NULL	NULL
Dr15099	GO:0015846|GO:0046872|GO:0042597|GO:0019808	NULL	protein	NULL	NULL	NULL	NULL	NULL
Dr15103	NULL	NULL	NULL	IPR004324|IPR016196	Biopterin transport-related protein BT1|Major facilitator superfamily domain, general substrate transporter	NULL	NULL	NULL
Dr15043	GO:0016787	NULL	dna replication atp-dependent helicase dna2	IPR026851|IPR014808|IPR027417	Dna2|DNA replication factor Dna2, N-terminal|P-loop containing nucleoside triphosphate hydrolase	GO:0017108|GO:0033567|GO:0043142	NULL	NULL
Dr15063	GO:0016023|GO:0005886	NULL	uncharacterized protein rsn1-like	IPR003864|IPR027815	Domain of unknown function DUF221|Domain of unknown function DUF4463	GO:0016020	NULL	NULL
Dr15064	GO:0055085|GO:0009845|GO:0016021|GO:0005353|GO:0005355|GO:0009911|GO:0015758|GO:0009705|GO:0016491|GO:0015755|GO:0009624|GO:0005886	NULL	d-xylose-proton symporter-like 2	IPR005828|IPR016196|IPR003663|IPR020846|IPR005829	General substrate transporter|Sugar/inositol transporter|Major facilitator superfamily domain, general substrate transporter|Major facilitator superfamily domain|Sugar transporter, conserved site	GO:0016021|GO:0022857|GO:0055085|GO:0016020|GO:0022891|GO:0005215|GO:0006810	NULL	Reactome: REACT_15518
Dr15075	GO:0005975|GO:0032450|GO:0030246|GO:0009507	EC:3.2.1.20	heteroglycan glucosidase 1	IPR000322|IPR025887|IPR017853|IPR011013|IPR013785	Glycoside hydrolase, family 31|Glycoside hydrolase family 31, N-terminal domain|Glycoside hydrolase, superfamily|Galactose mutarotase-like domain|Aldolase-type TIM barrel	GO:0004553|GO:0005975|GO:0003824|GO:0030246	NULL	NULL
Dr15079	GO:0071918|GO:0005886|GO:0015204|GO:0016021|GO:0015293|GO:0006995	NULL	urea active transporter-like protein	IPR001734|IPR019900	Sodium/solute symporter|Sodium/solute symporter, subgroup	GO:0005215|GO:0006810|GO:0016020|GO:0055085	NULL	NULL
Dr15113	GO:0055114|GO:0015996|GO:0016491|GO:0009570	NULL	red chlorophyll catabolite reductase	IPR009439	Red chlorophyll catabolite reductase	NULL	EC:1.3.1.80	KEGG: 00860+1.3.1.80|MetaCyc: PWY-5098|MetaCyc: PWY-6927|UniPathway: UPA00674
Dr15161	GO:0006457|GO:0005528|GO:0000413|GO:0003755|GO:0009535	EC:5.2.1.8	fk506 binding protein	IPR023566|IPR001179	Peptidyl-prolyl cis-trans isomerase, FKBP-type|Peptidyl-prolyl cis-trans isomerase, FKBP-type, domain	GO:0006457	NULL	NULL
Dr15163	GO:0009536	NULL	at4g27390 m4i22_200	NULL	NULL	NULL	NULL	NULL
Dr15179	GO:0044444|GO:0043231	NULL	ring zinc finger protein	NULL	NULL	NULL	NULL	NULL
Dr15184	GO:0005739	NULL	uncharacterized protein loc100844027 isoform 2	NULL	NULL	NULL	NULL	NULL
Dr15185	GO:0009941	NULL	tic22-like protein	IPR007378	Tic22-like	NULL	NULL	NULL
Dr15159	GO:0044699|GO:0009723	NULL	protein	IPR025558|IPR013143	Domain of unknown function DUF4283|PCI/PINT associated module	NULL	NULL	NULL
Dr15174	GO:0015031|GO:0009526|GO:0016020|GO:0005739	NULL	preprotein translocase subunit secy-like	IPR002208|IPR023201	SecY/SEC61-alpha family|SecY subunit domain	GO:0015031|GO:0016020	NULL	Reactome: REACT_15380
Dr15175	GO:0008152|GO:0016772	NULL	mevalonate kinase	IPR006205|IPR006204|IPR013750|IPR020568|IPR014721|IPR006206|IPR006203	Mevalonate kinase|GHMP kinase N-terminal domain|GHMP kinase, C-terminal domain|Mevalonate/galactokinase|Ribosomal protein S5 domain 2-type fold|Ribosomal protein S5 domain 2-type fold, subgroup|GHMP kinase, ATP-binding, conserved site	GO:0004496|GO:0005524|GO:0005737|GO:0008299|GO:0008152|GO:0016301|GO:0016773	EC:2.7.1.36|EC:2.7.1.6	KEGG: 00900+2.7.1.36|MetaCyc: PWY-6174|MetaCyc: PWY-922|KEGG: 00052+2.7.1.6|KEGG: 00520+2.7.1.6|MetaCyc: PWY-3821|MetaCyc: PWY-6317|MetaCyc: PWY-6527|UniPathway: UPA00214
Dr15119	GO:0009452|GO:0001510|GO:0008168	EC:2.1.1.0	ww domain-containing protein	IPR001202|IPR019012	WW domain|RNA cap guanine-N2 methyltransferase	GO:0005515|GO:0001510|GO:0008168|GO:0009452	EC:2.1.1.-	KEGG: 00130+2.1.1.-|KEGG: 00253+2.1.1.-|KEGG: 00270+2.1.1.-|KEGG: 00340+2.1.1.-|KEGG: 00350+2.1.1.-|KEGG: 00360+2.1.1.-|KEGG: 00380+2.1.1.-|KEGG: 00450+2.1.1.-|KEGG: 00522+2.1.1.-|KEGG: 00624+2.1.1.-|KEGG: 00627+2.1.1.-|KEGG: 00860+2.1.1.-|KEGG: 00940+2.1.1.-|KEGG: 00941+2.1.1.-|KEGG: 00942+2.1.1.-|KEGG: 00945+2.1.1.-|KEGG: 00950+2.1.1.-|KEGG: 00981+2.1.1.-
Dr15132	NULL	NULL	NULL	NULL	NULL	NULL	NULL	NULL
Dr15133	GO:0046488|GO:0044699|GO:0016307|GO:0016023|GO:0000166|GO:0016310|GO:0032502	NULL	phosphatidylinositol-4-phosphate 5-kinase	IPR023610|IPR002498|IPR003409|IPR027484|IPR027483|IPR016034|IPR017163	Phosphatidylinositol-4-phosphate 5-kinase|Phosphatidylinositol-4-phosphate 5-kinase, core|MORN motif|Phosphatidylinositol-4-phosphate 5-kinase, N-terminal domain|Phosphatidylinositol-4-phosphate 5-kinase, C-terminal|Phosphatidylinositol-4-phosphate 5-kinase, core, subgroup|Phosphatidylinositol-4-phosphate 5-kinase, plant	GO:0016307|GO:0046488|GO:0005524|GO:0016308	EC:2.7.1.68	KEGG: 00562+2.7.1.68|MetaCyc: PWY-6351|MetaCyc: PWY-6352
Dr15154	GO:0018344|GO:0004663|GO:0005968|GO:0018346	EC:2.5.1.60	geranylgeranyl transferase type-2 subunit beta	IPR026873|IPR001330|IPR008930	Geranylgeranyl transferase type-2 subunit beta|Prenyltransferase/squalene oxidase|Terpenoid cyclases/protein prenyltransferase alpha-alpha toroid	GO:0004663|GO:0018344|GO:0003824	NULL	NULL
Dr15269	GO:0003677|GO:0006355	NULL	nac domain ipr003441	IPR003441	NAC domain	GO:0003677|GO:0006355	NULL	NULL
Dr15275	GO:0009536|GO:0016020	NULL	esterase lipase domain-containing protein	NULL	NULL	NULL	NULL	NULL
Dr15213	GO:0016310|GO:0004672|GO:0016020|GO:0009536|GO:0000166	NULL	protein	IPR005349	Uncharacterised protein family UPF0136, Transmembrane	GO:0016020	NULL	NULL
Dr15200	GO:0052692|GO:0005975|GO:0009505|GO:0016757|GO:0016023|GO:0048046	EC:3.2.1.22	alpha-galactosidase 1	IPR000111|IPR017853|IPR013780|IPR013785|IPR002241	Glycoside hydrolase, clan GH-D|Glycoside hydrolase, family 27|Glycoside hydrolase, superfamily|Glycosyl hydrolase, family 13, all-beta|Aldolase-type TIM barrel	GO:0004553|GO:0005975|GO:0003824	EC:3.2.1.22	KEGG: 00052+3.2.1.22|KEGG: 00561+3.2.1.22|KEGG: 00600+3.2.1.22|KEGG: 00603+3.2.1.22|MetaCyc: PWY-6527
Dr15226	NULL	NULL	NULL	NULL	NULL	NULL	NULL	NULL
Dr15245	GO:0005739|GO:0004527	NULL	carbon catabolite repressor protein 4-like 4	IPR005135	Endonuclease/exonuclease/phosphatase	NULL	NULL	NULL
Dr15271	GO:0047372|GO:0003676|GO:0009536|GO:0016042|GO:0046486	EC:3.1.1.23	alpha beta fold family protein	IPR000073	Alpha/beta hydrolase fold-1	NULL	NULL	NULL
Dr15210	GO:0003896|GO:0006269|GO:0005657|GO:0005730|GO:0006351	NULL	dna primase	NULL	NULL	NULL	NULL	NULL
Dr15214	GO:0006464|GO:0016881	EC:6.3.2.0	probable ubiquitin-conjugating enzyme e2 23-like	IPR000608|IPR016135	Ubiquitin-conjugating enzyme, E2|Ubiquitin-conjugating enzyme/RWD-like	GO:0016881	NULL	NULL
Dr15204	GO:0009507|GO:0016020	NULL	uncharacterized transporter sll0355-like	IPR000620	Drug/metabolite transporter	GO:0016020	NULL	NULL
Dr15244	GO:0016023	NULL	protein notum homolog	IPR004963	Protein notum homologue	NULL	EC:3.-.-.-	KEGG: 00231+3.-.-.-|KEGG: 00563+3.-.-.-|KEGG: 00983+3.-.-.-
Dr15255	GO:0022891|GO:0055085|GO:0008643|GO:0016021	NULL	plastidic glucose transporter 4	IPR005828|IPR016196|IPR003663|IPR020846|IPR005829	General substrate transporter|Sugar/inositol transporter|Major facilitator superfamily domain, general substrate transporter|Major facilitator superfamily domain|Sugar transporter, conserved site	GO:0016021|GO:0022857|GO:0055085|GO:0016020|GO:0022891|GO:0005215|GO:0006810	NULL	Reactome: REACT_15518
Dr15264	GO:0009505|GO:0009044|GO:0010411|GO:0046556|GO:0046686|GO:0032450|GO:0016023|GO:0030246|GO:0009507|GO:0048046|GO:0045493|GO:0005982|GO:0005985|GO:0009117	EC:3.2.1.37|EC:3.2.1.55|EC:3.2.1.20	alpha-xylosidase precursor	IPR000322|IPR025887|IPR017853|IPR011013|IPR013785	Glycoside hydrolase, family 31|Glycoside hydrolase family 31, N-terminal domain|Glycoside hydrolase, superfamily|Galactose mutarotase-like domain|Aldolase-type TIM barrel	GO:0004553|GO:0005975|GO:0003824|GO:0030246	NULL	NULL
Dr15327	GO:0009536	NULL	uncharacterized protein	NULL	NULL	NULL	NULL	NULL
Dr15350	GO:0016874	NULL	s-adenosylmethionine-dependent methyltransferase domain-containing protein	IPR019410	Nicotinamide N-methyltransferase-like	NULL	NULL	NULL
Dr15358	GO:0006543|GO:0009570|GO:0016036|GO:0070409	NULL	carbamoyl-phosphate synthase small chain	IPR017926|IPR002474|IPR006274	Glutamine amidotransferase|Carbamoyl-phosphate synthase, small subunit N-terminal domain|Carbamoyl-phosphate synthase, small subunit	GO:0006543|GO:0070409	EC:6.3.5.5	Reactome: REACT_1698|KEGG: 00240+6.3.5.5|KEGG: 00250+6.3.5.5|MetaCyc: PWY-5154|MetaCyc: PWY-5686|UniPathway: UPA00068|UniPathway: UPA00070
Dr15314	NULL	NULL	NULL	IPR019129	Folate-sensitive fragile site protein Fra10Ac1	NULL	NULL	NULL
Dr15330	GO:0008152|GO:0016787|GO:0005739	NULL	protein	IPR002921	Lipase, class 3	GO:0004806|GO:0006629	NULL	Reactome: REACT_14797|Reactome: REACT_604
Dr24903	GO:0009536	NULL	uncharacterized protein	NULL	NULL	NULL	NULL	NULL
Dr15437	NULL	NULL	NULL	IPR017986|IPR011047|IPR015943|IPR001680	WD40-repeat-containing domain|Quinonprotein alcohol dehydrogenase-like superfamily|WD40/YVTN repeat-like-containing domain|WD40 repeat	GO:0005515	NULL	NULL
Dr15451	GO:0016020|GO:0005739|GO:0005488	NULL	carbon catabolite repressor protein 4 homolog 6-like	IPR009009|IPR005135|IPR014733	RlpA-like double-psi beta-barrel domain|Endonuclease/exonuclease/phosphatase|Barwin-like endoglucanase	NULL	NULL	NULL
Dr15466	GO:0016020	NULL	uncharacterized protein	IPR002794|IPR013894	Protein of unknown function DUF92, TMEM19|Domain of unknown function DUF1767	GO:0016021	NULL	NULL
Dr15470	GO:0019898|GO:0031977|GO:0005509|GO:0015979|GO:0009535|GO:0009654	NULL	domain-containing protein 5	IPR002683|IPR016123	Photosystem II PsbP, oxygen evolving complex|Mog1/PsbP, alpha/beta/alpha sandwich	GO:0005509|GO:0009523|GO:0009654|GO:0015979|GO:0019898	NULL	NULL
Dr15515	GO:0005507|GO:0042026|GO:0009408|GO:0005524|GO:0005759|GO:0009507|GO:0046686|GO:0022626|GO:0005886	NULL	chaperonin cpn60-like mitochondrial-like	IPR002423|IPR027409|IPR027413|IPR001844|IPR018370	Chaperonin Cpn60/TCP-1|Chaperonin Cpn60|GroEL-like apical domain|GroEL-like equatorial domain|Chaperonin Cpn60, conserved site	GO:0005524|GO:0044267|GO:0005737|GO:0042026|GO:0006457	NULL	NULL
Dr15518	GO:0042538|GO:0009705|GO:0005886|GO:0005509|GO:2000021|GO:0008152|GO:0003824	NULL	calcineurin b-like protein 10	IPR011992|IPR001125|IPR002048|IPR018247	EF-hand domain pair|Recoverin|EF-hand domain|EF-Hand 1, calcium-binding site	GO:0005509	NULL	NULL
Dr15523	GO:0016020	NULL	uncharacterized membrane	IPR021261	Protein of unknown function DUF2838	NULL	NULL	NULL
Dr15525	NULL	NULL	NULL	IPR018392|IPR019448	LysM domain|EEIG1/EHBP1 N-terminal domain	GO:0016998	NULL	NULL
Dr15535	GO:0044267|GO:0016853	NULL	peptidyl-prolyl cis-trans isomerase cwc27 homolog	IPR002130|IPR020892	Cyclophilin-like peptidyl-prolyl cis-trans isomerase domain|Cyclophilin-type peptidyl-prolyl cis-trans isomerase, conserved site	GO:0003755|GO:0006457	NULL	NULL
Dr15544	GO:0032259|GO:0005739|GO:0009507|GO:0008168	EC:2.1.1.0	protein	IPR013216	Methyltransferase type 11	GO:0008152|GO:0008168	NULL	NULL
Dr15546	GO:0004747|GO:0006014|GO:0016491|GO:0016310|GO:0009507|GO:0006098	EC:2.7.1.15	ribokinase	IPR011611|IPR002139|IPR017583|IPR002173	Carbohydrate kinase PfkB|Ribokinase|Tagatose/fructose phosphokinase|Carbohydrate/puine kinase, PfkB, conserved site	GO:0004747|GO:0006014|GO:0005975|GO:0016773	NULL	NULL
Dr15441	GO:0048609|GO:0004553|GO:0005975|GO:0016023|GO:0044702	EC:3.2.1.0	polygalacturonase	IPR000743|IPR011050|IPR012334	Glycoside hydrolase, family 28|Pectin lyase fold/virulence factor|Pectin lyase fold	GO:0004650|GO:0005975	NULL	NULL
Dr15455	NULL	NULL	NULL	NULL	NULL	NULL	NULL	NULL
Dr15471	GO:0016787|GO:0009507	NULL	nudix hydrolase 24	IPR015797|IPR000086	NUDIX hydrolase domain-like|NUDIX hydrolase domain	GO:0016787	NULL	NULL
Dr15491	GO:0009536	NULL	histidine protein methyltransferase 1 homolog	NULL	NULL	NULL	NULL	NULL
Dr15502	GO:0008152|GO:0003824|GO:0009536	NULL	violaxanthin de-epoxidase-related protein	NULL	NULL	NULL	NULL	NULL
Dr15510	GO:0009536|GO:0016887|GO:0000166|GO:0016020	EC:3.6.1.3	abc transporter retinal flippase subfamily	IPR026082|IPR003439|IPR027417|IPR003593|IPR017871	ABC transporter A, ABCA|ABC transporter-like|P-loop containing nucleoside triphosphate hydrolase|AAA+ ATPase domain|ABC transporter, conserved site	GO:0005524|GO:0016887|GO:0000166|GO:0017111	NULL	NULL
Dr15514	GO:0004553|GO:0043169|GO:0009507|GO:0005975	EC:3.2.1.0	plastid alpha-amylase	IPR015902|IPR006047|IPR012850|IPR017853|IPR013780|IPR013781|IPR006589	Glycoside hydrolase, family 13|Glycosyl hydrolase, family 13, catalytic domain|Alpha-amylase, C-terminal beta-sheet|Glycoside hydrolase, superfamily|Glycosyl hydrolase, family 13, all-beta|Glycoside hydrolase, catalytic domain|Glycosyl hydrolase, family 13, subfamily, catalytic domain	GO:0003824|GO:0005975|GO:0043169|GO:0004556|GO:0005509	EC:3.2.1.1	KEGG: 00500+3.2.1.1|MetaCyc: PWY-842
Dr15516	GO:0009536	NULL	chloroplastic group iia intron splicing facilitator chloroplastic-like	IPR001890	RNA-binding, CRM domain	GO:0003723	NULL	NULL
Dr15527	NULL	NULL	NULL	IPR007918	Mitochondrial distribution/morphology family 35/apoptosis	NULL	NULL	NULL
Dr15532	NULL	NULL	NULL	IPR014898|IPR003604	Zinc finger, C2H2, LYAR-type|Zinc finger, U1-type	GO:0003676|GO:0008270	NULL	NULL
Dr15538	GO:0016123|GO:0045435|GO:0016120|GO:0016705|GO:0009536	NULL	lycopene epsilon cyclase	IPR008671|IPR010108	Lycopene cyclase-type, FAD-binding|Lycopene cyclase, beta/epsilon	GO:0016117|GO:0016705	NULL	NULL
Dr15567	GO:0016779|GO:0003743|GO:0005840|GO:0006446	EC:2.7.7.0	translation initiation factor eif-2b subunit gamma-like	IPR001451|IPR025877	Bacterial transferase hexapeptide repeat|MobA-like NTP transferase domain	NULL	NULL	NULL
Dr15589	GO:0009543|GO:0019898|GO:0005509|GO:0009570|GO:0015979|GO:0009654	NULL	psbp domain-containing protein chloroplastic-like	IPR002683|IPR016123	Photosystem II PsbP, oxygen evolving complex|Mog1/PsbP, alpha/beta/alpha sandwich	GO:0005509|GO:0009523|GO:0009654|GO:0015979|GO:0019898	NULL	NULL
Dr03764	GO:0009737|GO:0046872|GO:0009987|GO:0006508|GO:0008235|GO:0004177	EC:3.4.11.0	protein	IPR000994|IPR003175|IPR001714|IPR002467	Peptidase M24, structural domain|Cyclin-dependent kinase inhibitor|Peptidase M24, methionine aminopeptidase|Peptidase M24A, methionine aminopeptidase, subfamily 1	GO:0009987|GO:0004861|GO:0005634|GO:0007050|GO:0004177|GO:0006508|GO:0008235	NULL	NULL
Dr03773	NULL	NULL	NULL	IPR016024|IPR011989|IPR000225	Armadillo-type fold|Armadillo-like helical|Armadillo	GO:0005488|GO:0005515	NULL	NULL
Dr03803	GO:0016740|GO:0045426|GO:1901663|GO:0016020|GO:0009536	NULL	#NAME?	IPR000537|IPR011937|IPR026046	UbiA prenyltransferase family|1,4-dihydroxy-2-naphthoate phytyltransferase|UbiA prenyltransferase domain containing protein 1	GO:0004659|GO:0016021	EC:2.5.1.-|EC:2.5.1.74	KEGG: 00130+2.5.1.-|KEGG: 00270+2.5.1.-|KEGG: 00361+2.5.1.-|KEGG: 00380+2.5.1.-|KEGG: 00860+2.5.1.-|KEGG: 00920+2.5.1.-|KEGG: 00130+2.5.1.74|MetaCyc: PWY-5839|MetaCyc: PWY-5851|MetaCyc: PWY-5852|MetaCyc: PWY-5853|MetaCyc: PWY-5890|MetaCyc: PWY-5891|MetaCyc: PWY-5892|MetaCyc: PWY-5895
Dr03811	GO:0005739|GO:0016740	NULL	trna (cytosine -c )-methyltransferase-like	IPR001678|IPR023267|IPR023270|IPR018314	Bacterial Fmu (Sun)/eukaryotic nucleolar NOL1/Nop2p|RNA (C5-cytosine) methyltransferase|tRNA (C5-cytosine) methyltransferase, NCL1|Bacterial Fmu (Sun)/eukaryotic nucleolar NOL1/Nop2p, conserved site	GO:0016428|GO:0003723|GO:0008168	NULL	NULL
Dr03762	GO:0016020	NULL	protein	NULL	NULL	NULL	NULL	NULL
Dr03771	GO:0003676|GO:0005634|GO:0008270	NULL	nucleic acid binding	IPR013085|IPR003604|IPR000690	Zinc finger, U1-C type|Zinc finger, U1-type|Zinc finger, C2H2-type matrin	GO:0008270|GO:0003676|GO:0005634	NULL	NULL
Dr03777	GO:0008270|GO:0009507|GO:0004089|GO:0015976|GO:0006730|GO:0006807	EC:4.2.1.1	carbonic anhydrase	IPR001765|IPR015892	Carbonic anhydrase|Carbonic anhydrase, prokaryotic-like, conserved site	GO:0004089|GO:0008270|GO:0015976	EC:4.2.1.1	KEGG: 00910+4.2.1.1|MetaCyc: PWY-6142
Dr03779	NULL	NULL	NULL	IPR023582|IPR001498|IPR020568	Impact family|Impact, N-terminal|Ribosomal protein S5 domain 2-type fold	NULL	NULL	NULL
Dr03787	GO:0004871|GO:0009785|GO:0009638	NULL	root phototropism protein	IPR027356|IPR011333|IPR000210	NPH3 domain|BTB/POZ fold|BTB/POZ-like	GO:0005515	NULL	UniPathway: UPA00143
Dr03799	GO:0009536	NULL	letm1-like protein	IPR011685	LETM1-like	NULL	NULL	NULL
Dr03826	GO:0009705|GO:0006904	NULL	vacuolar protein sorting-associated protein 33-like protein	IPR001619|IPR027121|IPR027482	Sec1-like protein|Vacuolar protein sorting-associated protein 33|Sec1-like, domain 2	GO:0006904|GO:0016192	NULL	NULL
Dr03869	GO:0016020	NULL	amino acid transporter	IPR013057	Amino acid transporter, transmembrane	NULL	NULL	NULL
Dr03898	GO:0005739	NULL	activating signal cointegrator 1-like	IPR007374|IPR015947	ASCH domain|PUA-like domain	NULL	NULL	NULL
Dr15639	GO:0008270|GO:0005622	NULL	protein	IPR015880|IPR001841	Zinc finger, C2H2-like|Zinc finger, RING-type	GO:0005515|GO:0008270	NULL	NULL
Dr15673	NULL	NULL	NULL	IPR000555|IPR015063	JAB/MPN domain|USP8 dimerisation domain	GO:0005515	NULL	NULL
Dr15689	GO:0006944|GO:0005795|GO:0006810	NULL	golgi snap receptor complex member 2	IPR027027	GOSR2/Membrin/Bos1	GO:0005795|GO:0006810	NULL	NULL
Dr15691	GO:0016020	NULL	mannose-p-dolichol utilization defect 1 protein	IPR016817|IPR006603	Mannose-P-dolichol utilization defect 1 protein|Cystinosin/ERS1p repeat	NULL	NULL	NULL
Dr15629	GO:0009982|GO:0003723|GO:0001522|GO:0008033	EC:5.4.99.12	trna pseudouridine synthase family protein	IPR001406|IPR020097|IPR020103|IPR020094|IPR020095|IPR004021	Pseudouridine synthase I, TruA|Pseudouridine synthase I, TruA, alpha/beta domain|Pseudouridine synthase, catalytic domain|Pseudouridine synthase I, TruA, N-terminal|Pseudouridine synthase I, TruA, C-terminal|HIN-200/IF120x	GO:0001522|GO:0003723|GO:0009451|GO:0009982	NULL	NULL
Dr15651	GO:0009630|GO:0009687|GO:0010374|GO:0009867|GO:0016020|GO:0010148|GO:0017006|GO:0023014|GO:0009585|GO:0006355|GO:0015979|GO:0010617|GO:0009638|GO:0018298|GO:0009584|GO:0000155|GO:0009649|GO:0010161|GO:0009883|GO:0010202|GO:0010029|GO:0009409|GO:0000160|GO:0031347|GO:0042803|GO:0005634|GO:0005524|GO:0006325|GO:0009365	NULL	phytochrome b	IPR013515|IPR003661|IPR013767|IPR003018|IPR003594|IPR013654|IPR009082|IPR000014|IPR001294|IPR012129|IPR016132|IPR005467|IPR013516	Phytochrome, central region|Signal transduction histidine kinase EnvZ-like, dimerisation/phosphoacceptor domain|PAS fold|GAF domain|Histidine kinase-like ATPase, ATP-binding domain|PAS fold-2|Phytochrome|Signal transduction histidine kinase, homodimeric domain|PAS domain|Phytochrome A/B/C/D/E|Phytochrome chromophore attachment domain|Signal transduction histidine kinase, core|Phytochrome chromoph…	GO:0006355|GO:0009584|GO:0018298|GO:0000155|GO:0007165|GO:0016020|GO:0005515|GO:0005524|GO:0004871|GO:0009585|GO:0009881|GO:0017006|GO:0042803	NULL	Reactome: REACT_1046
Dr15658	GO:0006508|GO:0009570|GO:0008236	NULL	probable glutamyl chloroplastic-like	IPR001375	Peptidase S9, prolyl oligopeptidase, catalytic domain	GO:0006508|GO:0008236	NULL	NULL
Dr15667	GO:0016020	NULL	neutral amino acid transport protein	IPR002293	Amino acid/polyamine transporter I	GO:0003333|GO:0015171|GO:0016020	NULL	NULL
Dr15674	NULL	NULL	NULL	NULL	NULL	NULL	NULL	NULL
Dr15726	GO:0009706	NULL	uncharacterized protein	IPR021788	Protein of unknown function DUF3353	NULL	NULL	NULL
Dr15731	GO:0004032|GO:0047006|GO:0055114|GO:0009507|GO:0006000|GO:0006012|GO:0006013|GO:0006090|GO:0046486|GO:0008207	EC:1.1.1.21|EC:1.1.1.149	aldo keto reductase family protein	IPR001395|IPR023210|IPR020471|IPR018170	Aldo/keto reductase|NADP-dependent oxidoreductase domain|Aldo/keto reductase subgroup|Aldo/keto reductase, conserved site	GO:0016491|GO:0055114	NULL	NULL
Dr15743	NULL	NULL	NULL	IPR004910	Yippee/Mis18	NULL	NULL	NULL
Dr15744	GO:0043231	NULL	pentatricopeptide repeat-containing	IPR002885	Pentatricopeptide repeat	NULL	NULL	NULL
Dr15745	GO:0009745|GO:0006109	NULL	impaired sucrose induction 1-like protein	IPR012535|IPR016024|IPR011989	Cell division protein Cdc14|Armadillo-type fold|Armadillo-like helical	GO:0005488	NULL	NULL
Dr15711	GO:0046872|GO:0016023|GO:0009055|GO:0045454|GO:0051537|GO:0015035|GO:0006118	NULL	glutaredoxin c3	IPR002109|IPR012336|IPR014025|IPR011899	Glutaredoxin|Glutaredoxin subgroup|Thioredoxin-like fold|Glutaredoxin, eukaryotic/virial	GO:0009055|GO:0015035|GO:0045454	NULL	NULL
Dr15735	GO:0009624|GO:0005886|GO:0034755|GO:0010043|GO:0051980|GO:0010039|GO:0016021|GO:0048316	NULL	metal-nicotianamine transporter ysl3-like	IPR004813	Oligopeptide transporter, OPT superfamily	GO:0055085	NULL	NULL
Dr15766	NULL	NULL	NULL	IPR022227	Protein of unknown function DUF3754	NULL	NULL	NULL
Dr15769	NULL	NULL	NULL	IPR013244|IPR017986|IPR015943	Secretory pathway Sec39|WD40-repeat-containing domain|WD40/YVTN repeat-like-containing domain	GO:0005515	NULL	NULL
Dr15789	GO:0009793|GO:0003676|GO:0030529	NULL	ribosome production factor 1-like	IPR007109|IPR004154	Brix domain|Anticodon-binding	NULL	NULL	NULL
Dr15813	GO:0043565	NULL	translin-associated protein x-like isoform 1	IPR002848|IPR016068|IPR016069	Translin|Translin, N-terminal|Translin, C-terminal	GO:0043565	NULL	NULL
Dr15820	GO:0005737|GO:0006633|GO:0008235|GO:0016491|GO:0005506|GO:0004177|GO:0016021|GO:0006508|GO:0055114	EC:3.4.11.0	methionine aminopeptidase 2b	IPR002468|IPR000994|IPR011991|IPR001714|IPR018349	Peptidase M24A, methionine aminopeptidase, subfamily 2|Peptidase M24, structural domain|Peptidase M24, methionine aminopeptidase|Winged helix-turn-helix DNA-binding domain|Peptidase M24A, methionine aminopeptidase, subfamily 2, binding site	GO:0004177|GO:0006508|GO:0008235|GO:0009987	NULL	NULL
Dr15833	GO:0009616|GO:0017111|GO:0000166	EC:3.6.1.15	atp-dependent helicase	IPR026127|IPR027417	Probable RNA helicase SDE3|P-loop containing nucleoside triphosphate hydrolase	GO:0009616	NULL	NULL
Dr15830	GO:0009561|GO:0016070|GO:0004004|GO:0003676|GO:0005739|GO:0005524|GO:0009555	NULL	rna helicase like protein	IPR001650|IPR022192|IPR027417	Helicase, C-terminal|Mitochondrial degradasome RNA helicase subunit, C-terminal domain|P-loop containing nucleoside triphosphate hydrolase	GO:0003676|GO:0004386|GO:0005524|GO:0016817	NULL	NULL
Dr15860	GO:0009536	NULL	protein always early 2-like	IPR010561|IPR028306|IPR001005|IPR009057|IPR017884	Protein LIN-9/Protein ALWAYS EARLY|Protein ALWAYS EARLY, plant|SANT/Myb domain|Homeodomain-like|SANT domain	GO:0006351|GO:0007049|GO:0017053|GO:0003682|GO:0003677	NULL	NULL
Dr15869	GO:0008270|GO:0005739|GO:0006355|GO:0016573|GO:0004402|GO:0000123|GO:0042967	EC:2.3.1.48	histone acetyltransferase	IPR002717|IPR025995|IPR016197|IPR016181|IPR000953	MOZ/SAS-like protein|RNA binding activity-knot of a chromodomain|Chromo domain-like|Acyl-CoA N-acyltransferase|Chromo domain/shadow	GO:0005634|GO:0006355|GO:0016747	NULL	NULL
Dr15876	NULL	NULL	NULL	IPR016969	Uncharacterised conserved protein UCP031088, alpha/beta hydrolase, At1g15070	NULL	NULL	NULL
Dr15859	GO:0009536	NULL	dnaj heat shock n-terminal domain-containing	IPR001623|IPR022226	DnaJ domain|Protein of unknown function DUF3752	NULL	NULL	NULL
Dr15863	NULL	NULL	NULL	IPR001683|IPR025258	Phox homologous domain|Domain of unknown function DUF4206	GO:0005515|GO:0007154|GO:0035091	NULL	NULL
Dr15866	NULL	NULL	NULL	NULL	NULL	NULL	NULL	NULL
Dr15903	GO:0031167|GO:0008168|GO:0009536	EC:2.1.1.0	protein	IPR004398	RNA methyltransferase, RsmD	GO:0008168|GO:0031167	NULL	NULL
Dr15916	GO:0006468|GO:0005524|GO:0004674|GO:0009069	EC:2.7.11.0	at1g04210	IPR000719|IPR025875|IPR011009|IPR002290|IPR003591|IPR001611|IPR008271	Protein kinase domain|Leucine rich repeat 4|Protein kinase-like domain|Serine/threonine- / dual specificity protein kinase, catalytic domain|Leucine-rich repeat, typical subtype|Leucine-rich repeat|Serine/threonine-protein kinase, active site	GO:0004672|GO:0005524|GO:0006468|GO:0016772|GO:0005515|GO:0004674	NULL	NULL
Dr15926	GO:0009536	NULL	uncharacterized protein	NULL	NULL	NULL	NULL	NULL
Dr15975	GO:0008152|GO:0008168|GO:0009536	EC:2.1.1.0	#NAME?	IPR002905	tRNA (guanine(26)-N(2))-dimethyltransferase	GO:0003723|GO:0004809|GO:0008033	NULL	MetaCyc: PWY-6829
Dr15979	GO:0016020|GO:0005783	NULL	reticulon-like protein b16	IPR003388	Reticulon	NULL	NULL	NULL
Dr15988	GO:0009536	NULL	defects in morphology protein	IPR019190	Exonuclease V	GO:0045145	NULL	NULL
Dr16006	NULL	NULL	NULL	IPR018627	Uncharacterised protein family UPF0405	NULL	NULL	NULL
Dr16022	NULL	NULL	NULL	IPR011011|IPR000967|IPR019787|IPR001841|IPR019786	Zinc finger, FYVE/PHD-type|Zinc finger, NF-X1-type|Zinc finger, PHD-finger|Zinc finger, RING-type|Zinc finger, PHD-type, conserved site	GO:0003700|GO:0005634|GO:0006355|GO:0008270|GO:0005515	NULL	NULL
Dr16024	GO:0009536	NULL	symplekin	IPR021850|IPR022075|IPR016024|IPR011989	Protein of unknown function DUF3453|Symplekin C-terminal|Armadillo-type fold|Armadillo-like helical	GO:0005488	NULL	NULL
Dr16031	GO:0016023|GO:0009620	NULL	uncharacterized protein	IPR026057|IPR025846	PC-Esterase|PMR5 N-terminal domain	NULL	NULL	NULL
Dr16036	GO:0046408|GO:0030494|GO:0031969|GO:0016021|GO:0005739	EC:2.5.1.62	chlorophyll synthase	IPR000537|IPR006372|IPR011799	UbiA prenyltransferase family|Bacteriochlorophyll/chlorophyll synthetase|Chlorophyll synthase, ChlG	GO:0004659|GO:0016021|GO:0015995|GO:0046408	EC:2.5.1.-|EC:2.5.1.62	KEGG: 00130+2.5.1.-|KEGG: 00270+2.5.1.-|KEGG: 00361+2.5.1.-|KEGG: 00380+2.5.1.-|KEGG: 00860+2.5.1.-|KEGG: 00920+2.5.1.-|KEGG: 00860+2.5.1.62|MetaCyc: PWY-5068|MetaCyc: PWY-5086
Dr16041	GO:0055114|GO:0009408|GO:0016491|GO:0016023|GO:0005788|GO:0009860	NULL	domain containing expressed	IPR001623|IPR012336|IPR018253	DnaJ domain|Thioredoxin-like fold|DnaJ domain, conserved site	NULL	NULL	NULL
Dr16043	GO:0008152	NULL	transcription factor bhlh140-like	IPR001310|IPR002589|IPR027417|IPR011146	Histidine triad (HIT) protein|Macro domain|P-loop containing nucleoside triphosphate hydrolase|HIT-like domain	GO:0003824	NULL	NULL
Dr16061	GO:0009536	NULL	pentatricopeptide repeat-containing protein chloroplastic-like	NULL	NULL	NULL	NULL	NULL
Dr16008	GO:0016020|GO:0009536	NULL	uncharacterized membrane protein stkorf319-like	IPR005496|IPR022369	Integral membrane protein TerC|Integral membrane protein TerC, riboswitch-linked	GO:0016021	NULL	NULL
Dr16016	GO:0055114|GO:0006552|GO:0005524|GO:0008470|GO:0050660|GO:0005759|GO:0006118|GO:0006550|GO:0006574	EC:1.3.99.10	isovaleryl- dehydrogenase	IPR009075|IPR006091|IPR013786|IPR009100|IPR006089	Acyl-CoA dehydrogenase/oxidase C-terminal|Acyl-CoA oxidase/dehydrogenase, central domain|Acyl-CoA dehydrogenase/oxidase, N-terminal|Acyl-CoA dehydrogenase/oxidase, N-terminal and middle domain|Acyl-CoA dehydrogenase, conserved site	GO:0016627|GO:0055114|GO:0003995|GO:0008152|GO:0050660	NULL	NULL
Dr16040	GO:0005643|GO:0016023|GO:0008565|GO:0006886	NULL	armadillo beta-catenin-like repeat-containing protein	IPR001494|IPR016024|IPR011989	Importin-beta, N-terminal domain|Armadillo-type fold|Armadillo-like helical	GO:0006886|GO:0008536|GO:0005488	NULL	NULL
Dr16057	GO:0016491|GO:0006829|GO:0055085|GO:0016020|GO:0008270|GO:0005385	NULL	zip transporter	IPR003689|IPR004698	Zinc/iron permease|Zinc/iron permease, fungal/plant	GO:0016020|GO:0030001|GO:0046873|GO:0055085|GO:0005385|GO:0016021|GO:0071577	NULL	NULL
Dr16072	GO:0017004|GO:0016021|GO:0009535	NULL	cytochrome c biogenesis protein chloroplastic-like	IPR007816|IPR023494	ResB-like domain|Cytochrome c biogenesis protein Ccs1/CcsB	NULL	NULL	NULL
Dr16075	GO:0009941|GO:0000312|GO:0003735|GO:0009570|GO:0016020|GO:0006412|GO:0019843|GO:0042254	NULL	ribosomal protein s9	IPR000754|IPR020568|IPR014721|IPR020574|IPR023035	Ribosomal protein S9|Ribosomal protein S5 domain 2-type fold|Ribosomal protein S5 domain 2-type fold, subgroup|Ribosomal protein S9, conserved site|Ribosomal protein S9, bacterial/plastid	GO:0003735|GO:0005840|GO:0006412	NULL	NULL
Dr16088	GO:0005739	NULL	uncharacterized protein	IPR024875	Protein Lines	NULL	NULL	NULL
Dr16091	GO:0051287|GO:0005507|GO:0055114|GO:0006526|GO:0005730|GO:0003942|GO:0046983|GO:0009570|GO:0046686|GO:0016020|GO:0000051	EC:1.2.1.38	n-acetyl-gamma-glutamyl-phosphate reductase	IPR000534|IPR012280|IPR016040|IPR000706|IPR023013	Semialdehyde dehydrogenase, NAD-binding|Semialdehyde dehydrogenase, dimerisation domain|NAD(P)-binding domain|N-acetyl-gamma-glutamyl-phosphate reductase, type 1|N-acetyl-gamma-glutamyl-phosphate reductase, active site	GO:0016620|GO:0051287|GO:0055114|GO:0003942|GO:0005737|GO:0008652|GO:0046983|GO:0006526	EC:1.2.1.38	KEGG: 00330+1.2.1.38|MetaCyc: PWY-5154|UniPathway: UPA00068
Dr16097	GO:0009414|GO:0006952|GO:0043531|GO:0051707|GO:0048046|GO:0080167	NULL	nbs-lrr resistance protein	IPR001611|IPR002182|IPR027417|IPR000767|IPR008808	Leucine-rich repeat|NB-ARC|Disease resistance protein|P-loop containing nucleoside triphosphate hydrolase|Powdery mildew resistance protein, RPW8 domain	GO:0005515|GO:0043531|GO:0006952	NULL	NULL
Dr16101	NULL	NULL	NULL	IPR019605|IPR003008	Misato Segment II tubulin-like domain|Tubulin/FtsZ, GTPase domain	NULL	NULL	NULL
Dr16122	GO:0009536	NULL	seed maturation protein expressed	IPR008479	Protein of unknown function DUF760	NULL	NULL	NULL
Dr16161	GO:0016023|GO:0008152|GO:0005739	NULL	asparagine synthetase domain-containing protein 1-like	IPR001962|IPR000583|IPR014729	Asparagine synthase|Class II glutamine amidotransferase domain|Rossmann-like alpha/beta/alpha sandwich fold	GO:0004066|GO:0006529|GO:0008152	NULL	NULL
Dr16189	GO:0003002|GO:0009653|GO:1901363|GO:0048513|GO:0044767|GO:0097159	NULL	heterogeneous nuclear ribonucleoprotein	IPR001806|IPR000504|IPR027417|IPR012677|IPR020849|IPR003578|IPR003579|IPR002041|IPR005225	Small GTPase superfamily|RNA recognition motif domain|P-loop containing nucleoside triphosphate hydrolase|Nucleotide-binding, alpha-beta plait|Small GTPase superfamily, Ras type|Small GTPase superfamily, Rho type|Small GTPase superfamily, Rab type|Ran GTPase|Small GTP-binding protein domain	GO:0005525|GO:0007264|GO:0003676|GO:0000166|GO:0003924|GO:0006184|GO:0007165|GO:0016020|GO:0005622|GO:0015031|GO:0006886|GO:0006913	NULL	Reactome: REACT_11044
Dr16077	GO:0016020|GO:0005739	NULL	casp-like protein at3g50810-like	IPR006702	Uncharacterised protein family UPF0497, trans-membrane plant	NULL	NULL	NULL
Dr16104	NULL	NULL	NULL	IPR024741|IPR016024|IPR011989	Condensin-2 complex subunit G2|Armadillo-type fold|Armadillo-like helical	GO:0005634|GO:0005488	NULL	NULL
Dr16114	GO:0035246|GO:0030731|GO:0016274|GO:0006525|GO:0006544|GO:0006560|GO:0006563|GO:0006566	EC:2.1.1.2	arginine n-methyltransferase	IPR020683|IPR002110|IPR026480	Ankyrin repeat-containing domain|Ankyrin repeat|Arginine N-methyltransferase 2-like domain	GO:0005515	NULL	NULL
Dr16125	GO:0046686|GO:0004475|GO:0005777|GO:0009058|GO:0006000|GO:0006013	EC:2.7.7.13	adp-glucose pyrophosphorylase-like protein	IPR001451|IPR005835|IPR011004	Bacterial transferase hexapeptide repeat|Nucleotidyl transferase|Trimeric LpxA-like	GO:0009058|GO:0016779	NULL	Reactome: REACT_17015
Dr16136	GO:0005739	NULL	uncharacterized protein	IPR003734	Protein of unknown function DUF155	NULL	NULL	NULL
Dr16144	NULL	NULL	NULL	IPR005351	Uncharacterised protein family UPF0139	NULL	NULL	NULL
Dr16157	GO:0047389|GO:0006071|GO:0005773|GO:0016023|GO:0008889|GO:0009395|GO:0046486	EC:3.1.4.2|EC:3.1.4.46	glycerophosphoryl diester phosphodiesterase	IPR004129|IPR017946	Glycerophosphoryl diester phosphodiesterase|PLC-like phosphodiesterase, TIM beta/alpha-barrel domain	GO:0006071|GO:0008889|GO:0006629|GO:0008081	NULL	NULL
Dr16166	GO:0016020|GO:0005739|GO:0008233	NULL	protein	IPR002610|IPR022764	Peptidase S54, rhomboid|Peptidase S54, rhomboid domain	GO:0004252|GO:0006508|GO:0016021	NULL	NULL
Dr16167	GO:0000325|GO:0005774|GO:0043190|GO:0010044|GO:0016021|GO:0008559|GO:0015421|GO:0006200|GO:0005886|GO:0005524|GO:0006855|GO:0006857	EC:3.6.3.44|EC:3.6.3.23	abc transporter family protein	IPR003439|IPR001140|IPR027417|IPR011527|IPR003593|IPR017871	ABC transporter-like|ABC transporter, transmembrane domain|P-loop containing nucleoside triphosphate hydrolase|ABC transporter type 1, transmembrane domain|AAA+ ATPase domain|ABC transporter, conserved site	GO:0005524|GO:0016887|GO:0006810|GO:0016021|GO:0042626|GO:0055085|GO:0000166|GO:0017111	NULL	NULL
Dr16172	GO:0005743|GO:0055085|GO:0016021|GO:0004420|GO:0055114|GO:0006694	EC:1.1.1.34	mitochondrial carrier protein	IPR018108|IPR023395|IPR002067	Mitochondrial substrate/solute carrier|Mitochondrial carrier protein|Mitochondrial carrier domain	GO:0055085	NULL	NULL
Dr16181	GO:0000160|GO:0009585|GO:0017006|GO:0006355|GO:0018298|GO:0009584|GO:0023014|GO:0005524|GO:0042803|GO:0009881|GO:0016020|GO:0000155|GO:0009365	NULL	phytochrome c	IPR013515|IPR003661|IPR013767|IPR003018|IPR003594|IPR013654|IPR000014|IPR001294|IPR012129|IPR016132|IPR005467|IPR013516	Phytochrome, central region|Signal transduction histidine kinase EnvZ-like, dimerisation/phosphoacceptor domain|PAS fold|GAF domain|Histidine kinase-like ATPase, ATP-binding domain|PAS fold-2|Phytochrome|PAS domain|Phytochrome A/B/C/D/E|Phytochrome chromophore attachment domain|Signal transduction histidine kinase, core|Phytochrome chromophore binding site	GO:0006355|GO:0009584|GO:0018298|GO:0000155|GO:0007165|GO:0016020|GO:0005515|GO:0005524|GO:0004871|GO:0009585|GO:0009881|GO:0017006|GO:0042803	NULL	Reactome: REACT_1046
Dr25034	GO:0005886	NULL	uncharacterized protein	IPR008506	Protein of unknown function DUF788, TMEM208	NULL	NULL	NULL
Dr16201	GO:0003676|GO:0009536|GO:0008859|GO:0051252	EC:3.1.13.1	rna exonuclease 4-like	IPR013520|IPR012337|IPR006055	Exonuclease, RNase T/DNA polymerase III|Ribonuclease H-like domain|Exonuclease	GO:0003676|GO:0004527	NULL	NULL
Dr16285	GO:0016020|GO:0005773|GO:0050896|GO:0005261|GO:0006812|GO:0050794|GO:0055085	NULL	two-pore calcium channel	IPR005821|IPR011992|IPR027359|IPR023393|IPR002048	Ion transport domain|EF-hand domain pair|Voltage-dependent channel, four helix bundle domain|START-like domain|EF-hand domain	GO:0005216|GO:0006811|GO:0016020|GO:0055085|GO:0005509	NULL	NULL
Dr16287	GO:0044464	NULL	26s proteasome non-atpase regulatory subunit 5	IPR019538|IPR016024	26S proteasome non-ATPase regulatory subunit 5|Armadillo-type fold	GO:0044183|GO:0005488	NULL	NULL
Dr16296	NULL	NULL	NULL	IPR000253|IPR008984	Forkhead-associated (FHA) domain|SMAD/FHA domain	GO:0005515	NULL	NULL
Dr16323	GO:0009536	NULL	meiosis expressed	NULL	NULL	NULL	NULL	NULL
Dr16247	GO:0005739	NULL	transcriptional regulator family	IPR012479	SAP30-binding protein	GO:0006355	NULL	NULL
Dr16205	NULL	NULL	NULL	NULL	NULL	NULL	NULL	NULL
Dr16261	GO:0016491|GO:0005886|GO:0005759|GO:0055114|GO:0000166	NULL	nadph:adrenodoxin mitochondrial	IPR016040|IPR021163	NAD(P)-binding domain|Adrenodoxin-NADP+ reductase	GO:0016491|GO:0055114	NULL	NULL
Dr16263	GO:0016614	NULL	l-gulonolactone oxidase-like	IPR006094|IPR007173|IPR016166|IPR016169|IPR010030	FAD linked oxidase, N-terminal|D-arabinono-1,4-lactone oxidase|FAD-binding, type 2|CO dehydrogenase flavoprotein-like, FAD-binding, subdomain 2|Plant-specific FAD-dependent oxidoreductase	GO:0008762|GO:0016491|GO:0050660|GO:0055114|GO:0003885|GO:0016020|GO:0003824|GO:0016614	EC:1.3.1.98	KEGG: 00520+1.3.1.98|KEGG: 00550+1.3.1.98|MetaCyc: PWY-6386|MetaCyc: PWY-6387|UniPathway: UPA00219
Dr16269	GO:0016020|GO:0005773|GO:0006810|GO:0005215	NULL	tonoplast intrinsic protein	IPR000425|IPR023271|IPR022357	Major intrinsic protein|Aquaporin-like|Major intrinsic protein, conserved site	GO:0005215|GO:0006810|GO:0016020	NULL	NULL
Dr16288	NULL	NULL	NULL	IPR014878|IPR011038	Domain of unknown function DUF1794|Calycin-like	NULL	NULL	NULL
Dr16313	NULL	NULL	NULL	IPR004088|IPR004087	K Homology domain, type 1|K Homology domain	GO:0003723	NULL	NULL
Dr16330	GO:0043234|GO:0051258|GO:0006184|GO:0003924|GO:0009507|GO:0005773|GO:0005525	NULL	uncharacterized protein	IPR011719|IPR018316	Conserved hypothetical protein CHP02058|Tubulin/FtsZ, 2-layer sandwich domain	GO:0003924|GO:0005525|GO:0006184|GO:0043234|GO:0051258	NULL	NULL
Dr16242	NULL	NULL	NULL	IPR026059	Rab3-GAP regulatory subunit	GO:0043087	NULL	NULL
Dr16249	NULL	NULL	NULL	IPR019378|IPR024709	GDP-fucose protein O-fucosyltransferase|O-fucosyltransferase, plant	NULL	EC:2.4.1.221	KEGG: 00514+2.4.1.221|UniPathway: UPA00378
Dr16255	GO:0009536	NULL	esterase lipase domain-containing protein	NULL	NULL	NULL	NULL	NULL
Dr03905	GO:0009536|GO:0016020	NULL	uncharacterized protein	NULL	NULL	NULL	NULL	NULL
Dr03909	GO:0003677|GO:0009536|GO:0005739	NULL	dna mismatch repair protein msh6-1	IPR015536|IPR000432|IPR007695|IPR007860|IPR007861|IPR007696|IPR027417|IPR016151|IPR002999|IPR017261	DNA mismatch repair protein MutS-homologue MSH6|DNA mismatch repair protein MutS, C-terminal|DNA mismatch repair protein MutS-like, N-terminal|DNA mismatch repair protein MutS, connector domain|DNA mismatch repair protein MutS, clamp|DNA mismatch repair protein MutS, core|P-loop containing nucleoside triphosphate hydrolase|DNA mismatch repair protein MutS, N-terminal|Tudor domain|DNA mismatch rep…	GO:0006298|GO:0005524|GO:0030983	NULL	NULL
Dr03931	GO:0005525|GO:0005622|GO:0007264	NULL	adp-ribosylation factor-like protein	IPR006689|IPR027417|IPR003579|IPR024156|IPR006687|IPR005225	Small GTPase superfamily, ARF/SAR type|P-loop containing nucleoside triphosphate hydrolase|Small GTPase superfamily, Rab type|Small GTPase superfamily, ARF type|Small GTPase superfamily, SAR1-type|Small GTP-binding protein domain	GO:0005525|GO:0007264|GO:0015031|GO:0005622|GO:0006886	NULL	NULL
Dr03951	NULL	NULL	NULL	NULL	NULL	NULL	NULL	NULL
Dr25052	GO:0030942|GO:0006614|GO:0005786|GO:0008312	NULL	signal recognition particle subunit srp14	IPR003210|IPR009018	Signal recognition particle, SRP14 subunit|Signal recognition particle, SRP9/SRP14 subunit	GO:0005786|GO:0006614|GO:0008312|GO:0030942|GO:0048500	NULL	Reactome: REACT_15380
Dr16335	GO:0044238|GO:0044763|GO:0034645|GO:0016023|GO:0044425|GO:0016757	NULL	gpi mannosyltransferase 1	IPR007704	Mannosyltransferase, DXD	GO:0005789|GO:0006506|GO:0016021|GO:0016758	EC:2.4.1.-	KEGG: 00051+2.4.1.-|KEGG: 00512+2.4.1.-|KEGG: 00513+2.4.1.-|KEGG: 00514+2.4.1.-|KEGG: 00522+2.4.1.-|KEGG: 00533+2.4.1.-|KEGG: 00540+2.4.1.-|KEGG: 00550+2.4.1.-|KEGG: 00561+2.4.1.-|KEGG: 00563+2.4.1.-|KEGG: 00600+2.4.1.-|KEGG: 00601+2.4.1.-|KEGG: 00603+2.4.1.-|KEGG: 00604+2.4.1.-|KEGG: 00906+2.4.1.-|KEGG: 00908+2.4.1.-|KEGG: 00941+2.4.1.-|KEGG: 00942+2.4.1.-|KEGG: 00944+2.4.1.-|KEGG: 00945+2.4.1.-…
Dr16353	GO:0072488|GO:0003723|GO:0048544|GO:0000178|GO:0016021|GO:0008519	NULL	exosome complex component csl4	IPR019495|IPR025721|IPR012340	Exosome complex component CSL4|Exosome complex component, N-terminal domain|Nucleic acid-binding, OB-fold	GO:0000178|GO:0003723	NULL	NULL
Dr16358	NULL	NULL	NULL	NULL	NULL	NULL	NULL	NULL
Dr16364	GO:0005840|GO:0003735|GO:0009507|GO:0016020|GO:0006412|GO:0042254	NULL	50s ribosomal protein chloroplast	IPR001383	Ribosomal protein L28	GO:0003735|GO:0005622|GO:0005840|GO:0006412	NULL	NULL
Dr16371	GO:0009536	NULL	protein	NULL	NULL	NULL	NULL	NULL
Dr16395	GO:0044444|GO:0043229	NULL	kinesin like protein	IPR027640|IPR001752|IPR027417	Kinesin-like protein|Kinesin, motor domain|P-loop containing nucleoside triphosphate hydrolase	GO:0003777|GO:0005871|GO:0007018|GO:0005524|GO:0008017	NULL	NULL
Dr16425	GO:0004672|GO:0006468|GO:0005524|GO:0005739	NULL	aarf domain-containing kinase	IPR002575|IPR004147|IPR011009|IPR000719	Aminoglycoside phosphotransferase|UbiB domain|Protein kinase-like domain|Protein kinase domain	GO:0016772|GO:0004672|GO:0005524|GO:0006468	NULL	NULL
Dr16344	GO:0044763|GO:0044464	NULL	clip-associating protein	IPR000357|IPR024395|IPR016024|IPR011989|IPR021133	HEAT|CLASP N-terminal domain|Armadillo-type fold|Armadillo-like helical|HEAT, type 2	GO:0005515|GO:0005488	NULL	NULL
Dr16373	GO:0044444|GO:0043229	NULL	ribosomal protein l15	IPR001258|IPR011042	NHL repeat|Six-bladed beta-propeller, TolB-like	GO:0005515	NULL	NULL
Dr16374	NULL	NULL	NULL	IPR022552	Uncharacterised protein family Ycf55	NULL	NULL	NULL
Dr16416	GO:0008080|GO:0009536|GO:0042967	NULL	acyl- n-acyltransferases-containing protein	IPR000182|IPR016181	GNAT domain|Acyl-CoA N-acyltransferase	GO:0008080	NULL	NULL
Dr16420	GO:0055114|GO:0009862|GO:0009401|GO:0019288|GO:0009941|GO:0009617|GO:0051539|GO:0016114|GO:0009570|GO:0046429|GO:0005351|GO:0005506	EC:1.17.7.1	4-hydroxy-3-methylbut-2-en-1-yl diphosphate synthase	IPR004588|IPR017178	4-hydroxy-3-methylbut-2-en-1-yl diphosphate synthase, bacterial-type|4-hydroxy-3-methylbut-2-en-1-yl diphosphate synthase, atypical	GO:0016114|GO:0046429|GO:0055114|GO:0005506|GO:0008299	EC:1.17.7.1	KEGG: 00900+1.17.7.1|UniPathway: UPA00056
Dr16428	GO:0010287|GO:0004672|GO:0006468|GO:0005524|GO:0005739	NULL	protein	IPR004147|IPR011009|IPR000719	UbiB domain|Protein kinase-like domain|Protein kinase domain	GO:0016772|GO:0004672|GO:0005524|GO:0006468	NULL	NULL
Dr16434	GO:0044238|GO:0008234|GO:0006508	NULL	metacaspase 9	IPR011600	Peptidase C14, caspase domain	GO:0004197|GO:0006508	NULL	NULL
Dr16500	GO:0009987	NULL	anaphase-promoting complex subunit 4	IPR024789|IPR024977|IPR024790|IPR017986|IPR015943|IPR001680	Anaphase-promoting complex subunit 4|Anaphase-promoting complex subunit 4, WD40 domain|Anaphase-promoting complex subunit 4 long domain|WD40-repeat-containing domain|WD40/YVTN repeat-like-containing domain|WD40 repeat	GO:0005680|GO:0030071|GO:0031145|GO:0005515	NULL	UniPathway: UPA00143
Dr16502	GO:0006259|GO:1901363|GO:0097159	NULL	dna repair protein xrcc4	IPR002775|IPR010585|IPR014751|IPR009089	DNA/RNA-binding protein Alba-like|DNA repair protein XRCC4|DNA repair protein XRCC4, C-terminal|DNA double-strand break repair and VJ recombination XRCC4, N-terminal	GO:0003676|GO:0003677|GO:0005634|GO:0006302|GO:0006310	NULL	NULL
Dr16505	GO:0003964|GO:0016301|GO:0006278|GO:0003723|GO:0009536	EC:2.7.7.49	pfkb-type carbohydrate kinase family protein	IPR011611	Carbohydrate kinase PfkB	NULL	NULL	NULL
Dr16462	GO:0005739	NULL	protein	NULL	NULL	NULL	NULL	NULL
Dr16466	NULL	NULL	NULL	IPR003323	Ovarian tumour, otubain	NULL	NULL	NULL
Dr16488	GO:0016020|GO:0009507	NULL	uncharacterized protein	IPR010420|IPR016040	CASTOR/POLLUX/SYM8 ion channels|NAD(P)-binding domain	NULL	NULL	NULL
Dr16494	NULL	NULL	NULL	IPR013083	Zinc finger, RING/FYVE/PHD-type	NULL	NULL	NULL
Dr16498	NULL	NULL	NULL	IPR001890	RNA-binding, CRM domain	GO:0003723	NULL	NULL
Dr16508	GO:0000166|GO:0009536	NULL	gtp-binding protein hflx	IPR016496|IPR006073|IPR025121|IPR027417|IPR005225	GTPase HflX|GTP binding domain|GTPase HflX N-terminal domain|P-loop containing nucleoside triphosphate hydrolase|Small GTP-binding protein domain	GO:0005525	NULL	NULL
Dr16515	GO:0008152|GO:0016787	NULL	2-hydroxy-6-oxo-6-phenylhexa- -dienoate hydrolase	IPR000073|IPR000639	Alpha/beta hydrolase fold-1|Epoxide hydrolase-like	GO:0003824	NULL	NULL
Dr16517	GO:0003676|GO:0005739|GO:0008026|GO:0005524	NULL	activating signal cointegrator 1 complex subunit 3	IPR011545|IPR001650|IPR004179|IPR027417|IPR014756|IPR003593|IPR014001	DNA/RNA helicase, DEAD/DEAH box type, N-terminal|Helicase, C-terminal|Sec63 domain|P-loop containing nucleoside triphosphate hydrolase|Immunoglobulin E-set|AAA+ ATPase domain|Helicase, superfamily 1/2, ATP-binding domain	GO:0003676|GO:0005524|GO:0008026|GO:0004386|GO:0000166|GO:0017111	NULL	NULL
Dr16439	GO:0016075|GO:0003723|GO:0004525|GO:0006396|GO:0051252	EC:3.1.26.3	ribonuclease iii family protein	IPR011907|IPR000999	Ribonuclease III|Ribonuclease III domain	GO:0003723|GO:0004525|GO:0016075|GO:0006396	NULL	NULL
Dr16469	GO:0008380|GO:0003723|GO:0006397|GO:0030529|GO:0005739	NULL	crs2-associated factor mitochondrial-like	IPR001890	RNA-binding, CRM domain	GO:0003723	NULL	NULL
Dr16478	GO:0055085|GO:0016021	NULL	uncharacterized protein	NULL	NULL	NULL	NULL	NULL
Dr16540	GO:0046872|GO:0008152|GO:0009536|GO:0008081	EC:3.1.4.0	hd domain-containing protein 2-like	IPR006674|IPR003607	HD domain|HD/PDEase domain	GO:0008081|GO:0046872|GO:0003824	NULL	NULL
Dr16531	NULL	NULL	NULL	NULL	NULL	NULL	NULL	NULL
Dr16532	GO:0006810|GO:0016020	NULL	protein	IPR018108|IPR023395	Mitochondrial substrate/solute carrier|Mitochondrial carrier domain	NULL	NULL	NULL
Dr16565	GO:0044699	NULL	tubulin-specific chaperone d-like	IPR022577|IPR016024|IPR011989|IPR021133	Tubulin-specific chaperone D, C-terminal|Armadillo-type fold|Armadillo-like helical|HEAT, type 2	GO:0005488	NULL	NULL
Dr16580	GO:0016020|GO:0044444|GO:0043231	NULL	vesicle-associated membrane	IPR000535|IPR008962|IPR016763	MSP domain|PapD-like|Vesicle-associated membrane protein	GO:0005198	NULL	Reactome: REACT_22258
Dr16596	GO:0004812|GO:0002161|GO:0006450|GO:0006418	NULL	rho guanine nucleotide exchange factor	IPR007214	YbaK/aminoacyl-tRNA synthetase-associated domain	GO:0002161	EC:6.1.1.15	KEGG: 00970+6.1.1.15
Dr16555	GO:0005794|GO:0032259|GO:0005739|GO:0008168	EC:2.1.1.0	probable methyltransferase pmt13-like	IPR004159	Putative S-adenosyl-L-methionine-dependent methyltransferase	GO:0008168	EC:2.1.1.-	KEGG: 00130+2.1.1.-|KEGG: 00253+2.1.1.-|KEGG: 00270+2.1.1.-|KEGG: 00340+2.1.1.-|KEGG: 00350+2.1.1.-|KEGG: 00360+2.1.1.-|KEGG: 00380+2.1.1.-|KEGG: 00450+2.1.1.-|KEGG: 00522+2.1.1.-|KEGG: 00624+2.1.1.-|KEGG: 00627+2.1.1.-|KEGG: 00860+2.1.1.-|KEGG: 00940+2.1.1.-|KEGG: 00941+2.1.1.-|KEGG: 00942+2.1.1.-|KEGG: 00945+2.1.1.-|KEGG: 00950+2.1.1.-|KEGG: 00981+2.1.1.-
Dr16566	GO:0003676|GO:0005737|GO:0009987|GO:0006508|GO:0008235|GO:0008270|GO:0004177	EC:3.4.11.0	methionine aminopeptidase 1a	IPR000994|IPR001714|IPR002467	Peptidase M24, structural domain|Peptidase M24, methionine aminopeptidase|Peptidase M24A, methionine aminopeptidase, subfamily 1	GO:0009987|GO:0004177|GO:0006508|GO:0008235	NULL	NULL
Dr16599	GO:0016020|GO:0005739|GO:0006810	NULL	glycerol-3-phosphate transporter 1-like	IPR011701|IPR016196|IPR000849|IPR020846	Major facilitator superfamily|Major facilitator superfamily domain, general substrate transporter|Sugar phosphate transporter|Major facilitator superfamily domain	GO:0016021|GO:0055085|GO:0005215|GO:0006810	NULL	NULL
Dr16600	GO:0005622|GO:0006810|GO:0005215	NULL	sec14-like 3 protein	IPR001251|IPR011074	CRAL-TRIO domain|CRAL/TRIO, N-terminal domain	NULL	NULL	NULL
Dr16610	GO:0005507|GO:0016787|GO:0005739|GO:0016853|GO:0018800|GO:0006570	EC:4.1.1.68	fumarylacetoacetate hydrolase domain-containing protein 1 homolog	IPR002529|IPR011234	Fumarylacetoacetase, C-terminal|Fumarylacetoacetase, C-terminal-related	GO:0003824|GO:0008152	NULL	NULL
Dr16632	GO:0006310|GO:0003676|GO:0008026|GO:0005524	NULL	bloom syndrome protein	IPR011545|IPR001650|IPR027417|IPR011991|IPR014001|IPR004589|IPR002464	DNA/RNA helicase, DEAD/DEAH box type, N-terminal|Helicase, C-terminal|P-loop containing nucleoside triphosphate hydrolase|Winged helix-turn-helix DNA-binding domain|Helicase, superfamily 1/2, ATP-binding domain|DNA helicase, ATP-dependent, RecQ type|DNA/RNA helicase, ATP-dependent, DEAH-box type, conserved site	GO:0003676|GO:0005524|GO:0008026|GO:0004386|GO:0006310	NULL	NULL
Dr16637	NULL	NULL	NULL	NULL	NULL	NULL	NULL	NULL
Dr16644	GO:0016023|GO:0005886	NULL	protein	NULL	NULL	NULL	NULL	NULL
Dr16645	GO:0005737|GO:0046835|GO:0005524|GO:0006012|GO:0004335|GO:0033858	EC:2.7.1.6|EC:2.7.1.157	galactose kinase	IPR006204|IPR013750|IPR019539|IPR020568|IPR014721|IPR000705|IPR006206|IPR019741|IPR006203	GHMP kinase N-terminal domain|GHMP kinase, C-terminal domain|Galactokinase galactose-binding domain|Galactokinase|Mevalonate/galactokinase|Ribosomal protein S5 domain 2-type fold|Ribosomal protein S5 domain 2-type fold, subgroup|Galactokinase, conserved site|GHMP kinase, ATP-binding, conserved site	GO:0005524|GO:0004335|GO:0006012|GO:0046835|GO:0005737|GO:0008152|GO:0016301|GO:0016773	EC:2.7.1.6	KEGG: 00052+2.7.1.6|KEGG: 00520+2.7.1.6|MetaCyc: PWY-3821|MetaCyc: PWY-6317|MetaCyc: PWY-6527|UniPathway: UPA00214
Dr16647	GO:0046872|GO:0008238|GO:0005739	NULL	metallopeptidase m24-like protein	IPR007865|IPR000994	Aminopeptidase P N-terminal domain|Peptidase M24, structural domain	GO:0004177|GO:0030145|GO:0009987	NULL	NULL
Dr16658	GO:0005840|GO:0003723|GO:0009507	NULL	ribosomal protein s1	IPR003029|IPR012340|IPR022967	Ribosomal protein S1, RNA-binding domain|Nucleic acid-binding, OB-fold|RNA-binding domain, S1	GO:0003723	NULL	NULL
Dr16691	GO:0006351|GO:0009583|GO:0038023|GO:0010114|GO:0005737|GO:0009606|GO:0010017|GO:0006464|GO:0005488|GO:0005634	NULL	phytochrome a	IPR013515|IPR013767|IPR003018|IPR003594|IPR013654|IPR000014|IPR001294|IPR012129|IPR016132|IPR005467	Phytochrome, central region|PAS fold|GAF domain|Histidine kinase-like ATPase, ATP-binding domain|PAS fold-2|Phytochrome|PAS domain|Phytochrome A/B/C/D/E|Phytochrome chromophore attachment domain|Signal transduction histidine kinase, core	GO:0006355|GO:0009584|GO:0018298|GO:0005515|GO:0005524|GO:0004871|GO:0007165|GO:0009585|GO:0009881|GO:0017006|GO:0042803	NULL	Reactome: REACT_1046
Dr16703	GO:0004222|GO:0006508|GO:0009535	EC:3.4.24.0	ethylene-dependent gravitropism-deficient and yellow-green-like 2 protein	IPR008915	Peptidase M50	GO:0004222|GO:0006508	NULL	NULL
Dr16614	GO:0000919	NULL	protein club	IPR021773|IPR022233	Foie gras liver health family 1|TRAPP II complex, TRAPPC10	NULL	NULL	NULL
Dr16622	NULL	NULL	NULL	IPR016024|IPR011989|IPR001313	Armadillo-type fold|Armadillo-like helical|Pumilio RNA-binding repeat	GO:0005488|GO:0003723	NULL	NULL
Dr16640	GO:0009536	NULL	nucleic acid-binding-like protein	IPR012340	Nucleic acid-binding, OB-fold	NULL	NULL	NULL
Dr16649	GO:0005975|GO:0050826|GO:0009707|GO:0016023|GO:0008422	EC:3.2.1.21	beta-glucosidase-like sfr2	IPR001360|IPR017853|IPR013781|IPR018120	Glycoside hydrolase, family 1|Glycoside hydrolase, superfamily|Glycoside hydrolase, catalytic domain|Glycoside hydrolase, family 1, active site	GO:0004553|GO:0005975|GO:0003824	NULL	NULL
Dr16652	GO:0009507	NULL	cyclase dehydrase	IPR005031|IPR023393	Streptomyces cyclase/dehydrase|START-like domain	NULL	NULL	NULL
Dr16656	GO:0003723|GO:0004004|GO:0006364|GO:0006200|GO:0005524|GO:0000184|GO:0005634	NULL	dead box atp-dependent rna	IPR011545|IPR001650|IPR001202|IPR027417|IPR014001|IPR000629	DNA/RNA helicase, DEAD/DEAH box type, N-terminal|Helicase, C-terminal|WW domain|P-loop containing nucleoside triphosphate hydrolase|Helicase, superfamily 1/2, ATP-binding domain|RNA helicase, ATP-dependent, DEAD-box, conserved site	GO:0003676|GO:0005524|GO:0008026|GO:0004386|GO:0005515	NULL	NULL
Dr16659	GO:0005488	NULL	nuclear export mediator factor nemf-like	IPR001878|IPR008532|IPR008616|IPR021846	Zinc finger, CCHC-type|Domain of unknown function DUF814|Fibronectin-binding A, N-terminal|Protein of unknown function DUF3441	GO:0003676|GO:0008270	NULL	NULL
Dr16664	NULL	NULL	NULL	IPR001494|IPR016024|IPR011989	Importin-beta, N-terminal domain|Armadillo-type fold|Armadillo-like helical	GO:0006886|GO:0008536|GO:0005488	NULL	NULL
Dr16669	GO:0005515	NULL	autophagy-related protein 8h	IPR004241	Autophagy-related protein Atg8 family	NULL	NULL	NULL
Dr16671	NULL	NULL	NULL	IPR001680|IPR017986|IPR015943	WD40 repeat|WD40-repeat-containing domain|WD40/YVTN repeat-like-containing domain	GO:0005515	NULL	NULL
Dr16682	NULL	NULL	NULL	IPR019331	NEFA-interacting nuclear protein NIP30, N-terminal	NULL	NULL	NULL
Dr16687	GO:0005739|GO:0006497|GO:0003824|GO:0016020	NULL	gpi ethanolamine phosphate transferase 3-like	IPR002591|IPR017850|IPR017849	Type I phosphodiesterase/nucleotide pyrophosphatase/phosphate transferase|Alkaline-phosphatase-like, core domain|Alkaline phosphatase-like, alpha/beta/alpha	GO:0003824|GO:0008152	NULL	NULL
Dr16763	NULL	NULL	NULL	IPR003435	Chaperonin-like RbcX	NULL	NULL	NULL
Dr16772	GO:0006457|GO:0005773|GO:0005886|GO:0000413|GO:0003755	EC:5.2.1.8	peptidyl-prolyl cis-trans isomerase	IPR002130|IPR024936|IPR020892	Cyclophilin-like peptidyl-prolyl cis-trans isomerase domain|Cyclophilin-type peptidyl-prolyl cis-trans isomerase|Cyclophilin-type peptidyl-prolyl cis-trans isomerase, conserved site	GO:0003755|GO:0006457	NULL	NULL
Dr16776	GO:0046872|GO:0005622|GO:0008168|GO:0006479	EC:2.1.1.0	probable protein arginine n-methyltransferase 3-like	IPR025799|IPR007087	Protein arginine N-methyltransferase|Zinc finger, C2H2	GO:0006479|GO:0008168|GO:0046872	EC:2.1.1.-	KEGG: 00130+2.1.1.-|KEGG: 00253+2.1.1.-|KEGG: 00270+2.1.1.-|KEGG: 00340+2.1.1.-|KEGG: 00350+2.1.1.-|KEGG: 00360+2.1.1.-|KEGG: 00380+2.1.1.-|KEGG: 00450+2.1.1.-|KEGG: 00522+2.1.1.-|KEGG: 00624+2.1.1.-|KEGG: 00627+2.1.1.-|KEGG: 00860+2.1.1.-|KEGG: 00940+2.1.1.-|KEGG: 00941+2.1.1.-|KEGG: 00942+2.1.1.-|KEGG: 00945+2.1.1.-|KEGG: 00950+2.1.1.-|KEGG: 00981+2.1.1.-
Dr03973	GO:0016851|GO:0005739|GO:0015995|GO:0051116|GO:0005524|GO:0009570|GO:0031969|GO:0015979|GO:0010007	EC:6.6.1.1|EC:6.6.1.2	magnesium chelatase h subunit	IPR003672|IPR022571|IPR011771	CobN/magnesium chelatase|Magnesium chelatase, subunit H, N-terminal|Magnesium-chelatase, subunit H	GO:0009058|GO:0016851|GO:0015995	EC:6.6.1.1	KEGG: 00860+6.6.1.1|MetaCyc: PWY-5531|MetaCyc: PWY-7159
Dr03974	GO:0016023|GO:0005739	NULL	serine-threonine protein plant-	IPR013210|IPR025875|IPR024788	Leucine-rich repeat-containing N-terminal, type 2|Leucine rich repeat 4|Malectin-like carbohydrate-binding domain	NULL	NULL	NULL
Dr03975	GO:0004750|GO:0006457|GO:0051087|GO:0005507|GO:0005759|GO:0000774|GO:0009570|GO:0009579|GO:0042803|GO:0006098|GO:0015976	EC:5.1.3.1	protein grpe	IPR000740|IPR009012|IPR013805	GrpE nucleotide exchange factor|GrpE nucleotide exchange factor, head|GrpE nucleotide exchange factor, coiled-coil	GO:0000774|GO:0006457|GO:0042803|GO:0051087	NULL	NULL
Dr03982	GO:0005975|GO:0005773|GO:0033947	EC:3.2.1.152	glycosyl hydrolase	IPR006102|IPR006103|IPR006104|IPR008979|IPR017853|IPR013812|IPR013781|IPR023232	Glycoside hydrolase, family 2, immunoglobulin-like beta-sandwich|Glycoside hydrolase, family 2, TIM barrel|Glycosyl hydrolases family 2, sugar binding domain|Galactose-binding domain-like|Glycoside hydrolase, superfamily|Glycoside hydrolase, family 2/20, immunoglobulin-like beta-sandwich domain|Glycoside hydrolase, catalytic domain|Glycoside hydrolase, family 2, active site	GO:0004553|GO:0005975|GO:0003824	EC:3.2.1.23	KEGG: 00052+3.2.1.23|KEGG: 00511+3.2.1.23|KEGG: 00531+3.2.1.23|KEGG: 00600+3.2.1.23|KEGG: 00604+3.2.1.23|MetaCyc: PWY-6791|MetaCyc: PWY-6807
Dr03984	GO:0006979|GO:0046686|GO:0009058|GO:0005759|GO:0004601|GO:0051920|GO:0055114|GO:0006804	EC:1.11.1.7|EC:1.11.1.15	type iif peroxiredoxin	IPR013740|IPR012336	Redoxin|Thioredoxin-like fold	GO:0016491	NULL	NULL
Dr16794	GO:0048731|GO:0006351|GO:0016573|GO:0004402|GO:0000123|GO:0042967	EC:2.3.1.48	histone acetyltransferase	IPR001487|IPR000182|IPR016181|IPR018359	Bromodomain|GNAT domain|Acyl-CoA N-acyltransferase|Bromodomain, conserved site	GO:0005515|GO:0008080	NULL	NULL
Dr16801	GO:0005737	NULL	peptide chain release factor 2-like	IPR000352|IPR005139|IPR014720|IPR000845	Peptide chain release factor class I/class II|Peptide chain release factor|Double-stranded RNA-binding domain|Nucleoside phosphorylase domain	GO:0003747|GO:0006415|GO:0005737|GO:0016149|GO:0003824|GO:0009116	NULL	NULL
Dr16804	GO:0016740	NULL	mediator of dna damage checkpoint protein	IPR001357|IPR016181	BRCT domain|Acyl-CoA N-acyltransferase	NULL	NULL	NULL
Dr16812	GO:0005975|GO:0005576|GO:0005773|GO:0004560	EC:3.2.1.51	alpha-l-fucosidase 1	IPR000933|IPR000421|IPR008979|IPR017853|IPR013781	Glycoside hydrolase, family 29|Coagulation factor 5/8 C-terminal type domain|Galactose-binding domain-like|Glycoside hydrolase, superfamily|Glycoside hydrolase, catalytic domain	GO:0004560|GO:0005975|GO:0007155|GO:0003824	EC:3.2.1.51	KEGG: 00511+3.2.1.51
Dr16815	GO:0009555|GO:0009536	NULL	uncharacterized protein	NULL	NULL	NULL	NULL	NULL
Dr16889	GO:0009058|GO:0004659|GO:0016020|GO:0005739	NULL	polyprenyltransferase 1	IPR000537|IPR006370	UbiA prenyltransferase family|4-hydroxybenzoate polyprenyl transferase	GO:0004659|GO:0016021|GO:0006744|GO:0009058	EC:2.5.1.-	KEGG: 00130+2.5.1.-|KEGG: 00270+2.5.1.-|KEGG: 00361+2.5.1.-|KEGG: 00380+2.5.1.-|KEGG: 00860+2.5.1.-|KEGG: 00920+2.5.1.-|KEGG: 00130+2.5.1.-|KEGG: 00270+2.5.1.-|KEGG: 00361+2.5.1.-|KEGG: 00380+2.5.1.-|KEGG: 00860+2.5.1.-|KEGG: 00920+2.5.1.-|UniPathway: UPA00232
Dr16902	GO:0006352|GO:0003743|GO:0005634|GO:0005840|GO:0006446	NULL	transcription initiation factor tfiid subunit 10	IPR003923	Transcription initiation factor TFIID, 23-30kDa subunit	GO:0005634|GO:0006352	NULL	NULL
Dr16951	GO:0015412|GO:0006200|GO:0005524|GO:0009555|GO:0016020|GO:0015689	EC:3.6.3.29	abc transporter g family member 26-like	IPR003439|IPR013525|IPR027417	ABC transporter-like|ABC-2 type transporter|P-loop containing nucleoside triphosphate hydrolase	GO:0005524|GO:0016887|GO:0016020	NULL	NULL
Dr16955	NULL	NULL	NULL	IPR001202	WW domain	GO:0005515	NULL	NULL
Dr16965	GO:0097159|GO:0009507|GO:1901363	NULL	phosphoglycerate mutase family protein	IPR013078	Histidine phosphatase superfamily, clade-1	NULL	NULL	NULL
Dr16970	GO:0015385|GO:0055075|GO:0005886|GO:0055085|GO:0006885|GO:0016021|GO:0006814|GO:0015992	NULL	sodium hydrogen exchanger 4-like	IPR018422|IPR006153|IPR004709	Cation/H+ exchanger, CPA1 family|Cation/H+ exchanger|Na+/H+ exchanger	GO:0006812|GO:0015299|GO:0016021|GO:0055085|GO:0006814|GO:0006885|GO:0015385	NULL	Reactome: REACT_15518
Dr16851	GO:0010541|GO:0016021|GO:0010329|GO:0010540|GO:0010315|GO:0042626|GO:0055085|GO:0006200|GO:0005886|GO:0005524	NULL	abc transporter b family member	IPR003439|IPR001140|IPR027417|IPR011527|IPR003593|IPR017871	ABC transporter-like|ABC transporter, transmembrane domain|P-loop containing nucleoside triphosphate hydrolase|ABC transporter type 1, transmembrane domain|AAA+ ATPase domain|ABC transporter, conserved site	GO:0005524|GO:0016887|GO:0006810|GO:0016021|GO:0042626|GO:0055085|GO:0000166|GO:0017111	NULL	NULL
Dr16856	GO:0044699|GO:0016491|GO:0044237|GO:0044425|GO:0009536|GO:0055114	NULL	immutans protein	IPR002680	Alternative oxidase	GO:0009916|GO:0055114	NULL	NULL
Dr16858	GO:0016042|GO:0016788	NULL	triacylglycerol lipase 2-like	IPR000719|IPR000073|IPR006693|IPR011009|IPR002290|IPR008271	Protein kinase domain|Alpha/beta hydrolase fold-1|Partial AB-hydrolase lipase domain|Protein kinase-like domain|Serine/threonine- / dual specificity protein kinase, catalytic domain|Serine/threonine-protein kinase, active site	GO:0004672|GO:0005524|GO:0006468|GO:0006629|GO:0016772|GO:0004674	NULL	NULL
Dr16882	GO:0009536	NULL	rna recognition motif -containing protein	NULL	NULL	NULL	NULL	NULL
Dr16885	GO:0044431|GO:0008565|GO:0016192|GO:0006886|GO:0030131	NULL	ap-1 complex subunit gamma-1	IPR017107|IPR002553|IPR008152|IPR016024|IPR013041|IPR011989|IPR008153	Adaptor protein complex AP-1, gamma subunit|Clathrin/coatomer adaptor, adaptin-like, N-terminal|Clathrin adaptor, alpha/beta/gamma-adaptin, appendage, Ig-like subdomain|Armadillo-type fold|Coatomer/clathrin adaptor appendage, Ig-like subdomain|Armadillo-like helical|Clathrin adaptor, gamma-adaptin, appendage	GO:0005794|GO:0008565|GO:0015031|GO:0006886|GO:0016192|GO:0030117|GO:0030131|GO:0005488	NULL	NULL
Dr16898	GO:0046872	NULL	ubiquitin-protein ligase zinc ion binding protein	IPR001357|IPR001841|IPR011011|IPR013083|IPR017907|IPR019786	BRCT domain|Zinc finger, RING-type|Zinc finger, FYVE/PHD-type|Zinc finger, RING/FYVE/PHD-type|Zinc finger, RING-type, conserved site|Zinc finger, PHD-type, conserved site	GO:0005515|GO:0008270	NULL	NULL
Dr16900	GO:0016020|GO:0016758	EC:2.4.1.0	alpha- -mannosyltransferase	IPR007873	Glycosyltransferase, ALG3	GO:0005783|GO:0016021|GO:0016758	EC:2.4.1.258	KEGG: 00510+2.4.1.258|KEGG: 00513+2.4.1.258|UniPathway: UPA00378
Dr16901	GO:0004834|GO:0030170|GO:0000162|GO:0009536|GO:0006571|GO:0009094	EC:4.2.1.20	tryptophan synthase beta chain	IPR006316|IPR001926	Tryptophan synthase, beta chain-like|Tryptophan synthase beta subunit-like PLP-dependent enzymes superfamily	GO:0000162|GO:0004834|GO:0030170	EC:4.2.1.20	KEGG: 00260+4.2.1.20|KEGG: 00400+4.2.1.20|UniPathway: UPA00035
Dr16905	GO:0046872|GO:0004619|GO:0006094|GO:0006096	EC:5.4.2.1	cofactor-independent phosphoglycerate mutase	IPR006124|IPR004456|IPR017850|IPR017849	Metalloenzyme|Bisphosphoglycerate-independent phosphoglycerate mutase|Alkaline-phosphatase-like, core domain|Alkaline phosphatase-like, alpha/beta/alpha	GO:0003824|GO:0046872|GO:0008152	NULL	UniPathway: UPA00109
Dr16923	GO:0008270|GO:0048364|GO:0009926|GO:0009640|GO:0016023|GO:0009733|GO:0004842|GO:0016567|GO:0048283|GO:0009826|GO:0016020	EC:6.3.2.19	e3 ubiquitin-protein ligase ubr4	IPR000433|IPR025704|IPR016024|IPR013993|IPR003126	Zinc finger, ZZ-type|E3 ubiquitin ligase, UBR4|Armadillo-type fold|Zinc finger, N-recognin, metazoa|Zinc finger, N-recognin	GO:0008270|GO:0005488|GO:0004842	EC:6.3.2.-	KEGG: 00300+6.3.2.-|KEGG: 00380+6.3.2.-
Dr16946	GO:0016791|GO:0008152	EC:3.1.3.0	phosphoglycolate phosphatase precursor	IPR006357|IPR023214|IPR023215|IPR006349	HAD-superfamily hydrolase, subfamily IIA|HAD-like domain|Nitrophenylphosphatase-like domain|2-phosphoglycolate phosphatase, eukaryotic	GO:0008152|GO:0016791	NULL	NULL
Dr16952	GO:0030246|GO:0004540|GO:0051252	NULL	rnase e g-like protein	IPR002044|IPR019307|IPR013784|IPR012340|IPR013783	Carbohydrate binding module family 20|RNA-binding protein AU-1/Ribonuclease E/G|Carbohydrate-binding-like fold|Nucleic acid-binding, OB-fold|Immunoglobulin-like fold	GO:2001070|GO:0003723|GO:0030246	NULL	NULL
Dr16967	GO:0005198|GO:0010020|GO:0005525|GO:0051301|GO:0006184|GO:0005874|GO:0051258|GO:0009570|GO:0003924|GO:0007018	NULL	cell division protein chloroplast homolog precursor	IPR003008|IPR024757|IPR008280|IPR018316|IPR000158|IPR017975|IPR020805	Tubulin/FtsZ, GTPase domain|Cell division protein FtsZ, C-terminal|Cell division protein FtsZ|Tubulin/FtsZ, C-terminal|Tubulin/FtsZ, 2-layer sandwich domain|Tubulin, conserved site|Cell division protein FtsZ, conserved site	GO:0003924|GO:0005525|GO:0006184|GO:0043234|GO:0051258|GO:0005737|GO:0005874|GO:0007017	NULL	NULL
Dr16978	GO:0005739	NULL	pentatricopeptide repeat-containing protein	IPR002885|IPR011990	Pentatricopeptide repeat|Tetratricopeptide-like helical	GO:0005515	NULL	NULL
Dr16995	GO:0048869|GO:0043234|GO:0048364|GO:0051301|GO:0044446|GO:0050794|GO:0009653|GO:0022414|GO:0005634	NULL	cell division cycle protein 27 homolog b-like	IPR026819|IPR001440|IPR004776|IPR013105|IPR011990|IPR019734|IPR013026	Cell division cycle protein 27A/B, plant|Tetratricopeptide TPR1|Auxin efflux carrier|Tetratricopeptide TPR2|Tetratricopeptide-like helical|Tetratricopeptide repeat|Tetratricopeptide repeat-containing domain	GO:0005680|GO:0030154|GO:0051302|GO:0005515|GO:0016021|GO:0055085	NULL	UniPathway: UPA00143
Dr17019	NULL	NULL	NULL	NULL	NULL	NULL	NULL	NULL
Dr17042	NULL	NULL	NULL	IPR007239	Autophagy-related protein 5	GO:0005737|GO:0006914	NULL	NULL
Dr17048	NULL	NULL	NULL	NULL	NULL	NULL	NULL	NULL
Dr17005	GO:0003723	NULL	apo protein 1	IPR023342	APO domain	GO:0003723	NULL	NULL
Dr17036	GO:0008026|GO:0003676|GO:0005739	NULL	rad3-like dna-binding helicase protein	IPR010614|IPR006555|IPR027417|IPR006554|IPR014013	DEAD2|ATP-dependent helicase, C-terminal|P-loop containing nucleoside triphosphate hydrolase|Helicase-like, DEXD box c2 type|Helicase, superfamily 1/2, ATP-binding domain, DinG/Rad3-type	GO:0003677|GO:0004003|GO:0005524|GO:0003676|GO:0006139|GO:0008026|GO:0016818|GO:0016817	NULL	NULL
Dr17065	GO:0009570|GO:0010020	NULL	protein accumulation and replication of chloroplasts 3-like	IPR003409|IPR003008	MORN motif|Tubulin/FtsZ, GTPase domain	NULL	NULL	NULL
Dr17087	GO:0008270	NULL	potyviral helper component protease-interacting protein 1	IPR001841|IPR013083	Zinc finger, RING-type|Zinc finger, RING/FYVE/PHD-type	GO:0005515|GO:0008270	NULL	NULL
Dr17089	GO:0005739	NULL	pentatricopeptide repeat-containing protein	IPR002885|IPR011990	Pentatricopeptide repeat|Tetratricopeptide-like helical	GO:0005515	NULL	NULL
Dr17108	NULL	NULL	NULL	NULL	NULL	NULL	NULL	NULL
Dr17128	GO:0005524|GO:0004386	NULL	aaa-type atpase-like protein	IPR003959|IPR007330|IPR027417|IPR003593|IPR003960	ATPase, AAA-type, core|MIT|P-loop containing nucleoside triphosphate hydrolase|AAA+ ATPase domain|ATPase, AAA-type, conserved site	GO:0005524|GO:0000166|GO:0017111	NULL	NULL
Dr17137	GO:0006814|GO:0009753|GO:0016021|GO:0009611|GO:0009941|GO:0008508|GO:0019761|GO:0015721	NULL	bile acid:sodium symporter family protein	IPR002657	Bile acid:sodium symporter	GO:0006814|GO:0008508|GO:0016020	NULL	NULL
Dr17138	GO:0009536|GO:0016020	NULL	uncharacterized protein	IPR019634	Uncharacterised protein family Ycf49	NULL	NULL	NULL
Dr17085	GO:0016603|GO:0017186	EC:2.3.2.5	glutamine cyclotransferase precursor	IPR007788|IPR015943	Glutamine cyclotransferase|WD40/YVTN repeat-like-containing domain	GO:0005515	NULL	NULL
Dr17088	GO:0008026|GO:0003723|GO:0005524|GO:0009507	NULL	dead-box atp-dependent rna helicase 58	IPR011545|IPR001650|IPR027417|IPR014001	DNA/RNA helicase, DEAD/DEAH box type, N-terminal|Helicase, C-terminal|P-loop containing nucleoside triphosphate hydrolase|Helicase, superfamily 1/2, ATP-binding domain	GO:0003676|GO:0005524|GO:0008026|GO:0004386	NULL	NULL
Dr17096	NULL	NULL	NULL	IPR001012|IPR012336|IPR006577	UBX|Thioredoxin-like fold|UAS	GO:0005515	NULL	NULL
Dr17101	GO:0017111|GO:0005525|GO:0009772|GO:0051301|GO:0009507|GO:0006184|GO:0003677|GO:0006614|GO:0045038|GO:0010027|GO:0006281	EC:3.6.1.15	fused signal recognition particle receptor	IPR000897|IPR013822|IPR027417	Signal recognition particle, SRP54 subunit, GTPase domain|Signal recognition particle, SRP54 subunit, helical bundle|P-loop containing nucleoside triphosphate hydrolase	GO:0005525|GO:0006614	NULL	Reactome: REACT_15380
Dr17116	GO:0009555|GO:0003697|GO:0006974|GO:0048256|GO:0005634|GO:0003690|GO:0006308	NULL	5 -3 exonuclease-like protein	IPR006084|IPR006085|IPR020045	XPG/Rad2 endonuclease|XPG N-terminal|5'-3' exonuclease, C-terminal domain	GO:0004518|GO:0006281|GO:0003677|GO:0003824	NULL	NULL
Dr17164	GO:0007018|GO:0005875|GO:0005524|GO:0003777|GO:0005874	NULL	chromosome-associated kinesin	IPR027640|IPR001752|IPR027417|IPR019821	Kinesin-like protein|Kinesin, motor domain|P-loop containing nucleoside triphosphate hydrolase|Kinesin, motor region, conserved site	GO:0003777|GO:0005871|GO:0007018|GO:0005524|GO:0008017	NULL	NULL
Dr17174	GO:0009536	NULL	protein	NULL	NULL	NULL	NULL	NULL
Dr17165	NULL	NULL	NULL	IPR011047|IPR027295	Quinonprotein alcohol dehydrogenase-like superfamily|Quinonprotein alcohol dehydrogenase-like domain	NULL	NULL	NULL
Dr17175	NULL	NULL	NULL	IPR021850|IPR022075|IPR016024	Protein of unknown function DUF3453|Symplekin C-terminal|Armadillo-type fold	GO:0005488	NULL	NULL
Dr17189	GO:0004045|GO:0005739|GO:0009507	EC:3.1.1.29	peptidyl-trna hydrolase	IPR001328|IPR018171	Peptidyl-tRNA hydrolase|Peptidyl-tRNA hydrolase, conserved site	GO:0004045	NULL	NULL
Dr17217	GO:0005885|GO:0000902|GO:0034314	NULL	actin-related protein 2 3 complex subunit 4-like	IPR008384	ARP2/3 complex, 20kDa subunit (P20-Arc)	GO:0005856|GO:0005885|GO:0030041|GO:0034314	NULL	NULL
Dr17336	NULL	NULL	NULL	IPR000007|IPR025659	Tubby, C-terminal|Tubby C-terminal-like domain	NULL	NULL	NULL
Dr17343	NULL	NULL	NULL	IPR000626|IPR007240|IPR019460|IPR019955	Ubiquitin domain|Autophagy-related protein 17|Autophagy-related protein 11|Ubiquitin supergroup	GO:0005515|GO:0006914	NULL	NULL
Dr17255	NULL	NULL	NULL	NULL	NULL	NULL	NULL	NULL
Dr17267	GO:0005634|GO:0009536|GO:0005739	NULL	digestive organ expansion factor-like protein	IPR010678	Digestive organ expansion factor, predicted	GO:0005634	NULL	NULL
Dr17274	GO:0044260|GO:0003913|GO:1901363|GO:0044238|GO:0097159|GO:0009536	NULL	cryptochrome dash	IPR006050|IPR005101|IPR014729|IPR002081	DNA photolyase, N-terminal|DNA photolyase, FAD-binding/Cryptochrome, C-terminal|Cryptochrome/DNA photolyase, class 1|Rossmann-like alpha/beta/alpha sandwich fold	GO:0003913|GO:0006281	NULL	NULL
Dr17282	NULL	NULL	NULL	IPR004088|IPR004087	K Homology domain, type 1|K Homology domain	GO:0003723	NULL	NULL
Dr17291	GO:0006457|GO:0016272|GO:0051082	NULL	prefoldin subunit	IPR002777|IPR009053	Prefoldin beta-like|Prefoldin	GO:0006457|GO:0016272|GO:0051082	NULL	NULL
Dr17319	GO:0016301|GO:0005975|GO:0016773|GO:0016310|GO:0009507	EC:2.7.1.0	fggy family of carbohydrate kinase	IPR018484|IPR018485|IPR006003	Carbohydrate kinase, FGGY, N-terminal|Carbohydrate kinase, FGGY, C-terminal|Carbohydrate kinase, FGGY-related	GO:0005975|GO:0016773	EC:2.7.1.-	KEGG: 00540+2.7.1.-|KEGG: 00680+2.7.1.-|KEGG: 00900+2.7.1.-
Dr17339	NULL	NULL	NULL	IPR017986|IPR015943	WD40-repeat-containing domain|WD40/YVTN repeat-like-containing domain	GO:0005515	NULL	NULL
Dr17340	GO:0005840|GO:0003735|GO:0009507|GO:0006412|GO:0042254	NULL	ribosomal protein l35	IPR021137|IPR001706|IPR018265	Ribosomal protein L35|Ribosomal protein L35, non-mitochondrial|Ribosomal protein L35, conserved site	GO:0003735|GO:0005622|GO:0005840|GO:0006412	NULL	NULL
Dr17271	GO:0043231|GO:0044444	NULL	metaxin-related protein	IPR010987	Glutathione S-transferase, C-terminal-like	NULL	NULL	NULL
Dr17288	GO:0004725|GO:0004045|GO:0035335|GO:0006570	EC:3.1.3.48|EC:3.1.1.29	protein	IPR017867|IPR002833|IPR023476	Protein-tyrosine phosphatase, low molecular weight|Peptidyl-tRNA hydrolase, PTH2|Peptidyl-tRNA hydrolase II domain	GO:0004725|GO:0006470|GO:0004045	NULL	NULL
Dr17297	GO:0044260|GO:0090304|GO:0003824	NULL	rna binding	IPR000477|IPR024937	Reverse transcriptase|Domain X	GO:0003723|GO:0003964|GO:0006278|GO:0006397	NULL	NULL
Dr17315	GO:0097159|GO:0006139|GO:1901363|GO:0003824	NULL	set domain-containing protein	NULL	NULL	NULL	NULL	NULL
Dr17317	GO:0043168|GO:0008483|GO:0046872|GO:0016874|GO:0000166|GO:0008152	EC:2.6.1.0	protein	IPR005814|IPR027417|IPR015424|IPR015421|IPR015422	Aminotransferase class-III|P-loop containing nucleoside triphosphate hydrolase|Pyridoxal phosphate-dependent transferase|Pyridoxal phosphate-dependent transferase, major region, subdomain 1|Pyridoxal phosphate-dependent transferase, major region, subdomain 2	GO:0008483|GO:0030170|GO:0003824	NULL	NULL
Dr17372	GO:0016874|GO:0009695|GO:0009611|GO:0016491|GO:0005777|GO:0005524	NULL	opc-8:0 ligase1	IPR000873|IPR020845	AMP-dependent synthetase/ligase|AMP-binding, conserved site	GO:0003824|GO:0008152	NULL	NULL
Dr04026	GO:0046983|GO:0006355	NULL	transcription factor une10-like	IPR011598	Myc-type, basic helix-loop-helix (bHLH) domain	GO:0046983	NULL	NULL
Dr04030	GO:0009536	NULL	uncharacterized protein	IPR002812	3-dehydroquinate synthase	GO:0003856|GO:0009073|GO:0016491|GO:0055114	EC:1.4.1.24	KEGG: 00400+1.4.1.24|MetaCyc: PWY-6160
Dr04040	NULL	NULL	NULL	IPR007205|IPR007206|IPR016024|IPR011989	FAM203 N-terminal|FAM203 C-terminal|Armadillo-type fold|Armadillo-like helical	GO:0005488	NULL	NULL
Dr04052	GO:0003824|GO:0005739	NULL	protein	IPR004143	Biotin/lipoate A/B protein ligase	GO:0003824|GO:0006464	EC:2.3.1.181	KEGG: 00785+2.3.1.181|MetaCyc: PWY-6987
Dr04059	NULL	NULL	NULL	IPR002885	Pentatricopeptide repeat	NULL	NULL	NULL
Dr04065	GO:0016023|GO:0042973|GO:0005982|GO:0005985	EC:3.2.1.39	glucan endo- -beta-glucosidase	IPR000490|IPR012946|IPR017853|IPR013781	Glycoside hydrolase, family 17|X8|Glycoside hydrolase, superfamily|Glycoside hydrolase, catalytic domain	GO:0004553|GO:0005975|GO:0003824	EC:3.2.1.39	KEGG: 00500+3.2.1.39
Dr04073	GO:0005975|GO:0051287|GO:0047952|GO:0004367|GO:0046168|GO:0009331|GO:0042803|GO:0055114|GO:0046486	EC:1.1.1.94|EC:1.1.1.8	glycerol-3-phosphate dehydrogenase	IPR006168|IPR006109|IPR008927|IPR013328|IPR016040	Glycerol-3-phosphate dehydrogenase, NAD-dependent|Glycerol-3-phosphate dehydrogenase, NAD-dependent, C-terminal|6-phosphogluconate dehydrogenase, C-terminal-like|Dehydrogenase, multihelical|NAD(P)-binding domain	GO:0004367|GO:0006072|GO:0009331|GO:0055114|GO:0005975|GO:0016491|GO:0016616|GO:0050662	EC:1.1.1.94	KEGG: 00564+1.1.1.94|MetaCyc: PWY-5667|MetaCyc: PWY-5981|UniPathway: UPA00940
Dr04029	GO:0016853|GO:0009451	NULL	trna pseudouridine synthase 3-like	IPR001406|IPR020097|IPR020103|IPR020094|IPR020095	Pseudouridine synthase I, TruA|Pseudouridine synthase I, TruA, alpha/beta domain|Pseudouridine synthase, catalytic domain|Pseudouridine synthase I, TruA, N-terminal|Pseudouridine synthase I, TruA, C-terminal	GO:0001522|GO:0003723|GO:0009451|GO:0009982	NULL	NULL
Dr04048	GO:0005840|GO:0003735|GO:0006412|GO:0009536|GO:0042254	NULL	50s ribosomal protein chloroplast	IPR005484	Ribosomal protein L18/L5	GO:0003735|GO:0005622|GO:0005840|GO:0006412	NULL	NULL
Dr04056	NULL	NULL	NULL	IPR013083|IPR001841	Zinc finger, RING/FYVE/PHD-type|Zinc finger, RING-type	GO:0005515|GO:0008270	NULL	NULL
Dr04081	NULL	NULL	NULL	IPR018552	Centromere protein X	GO:0006281|GO:0051382	NULL	NULL
Dr04088	GO:0008152|GO:0008168|GO:0005739	EC:2.1.1.0	low quality protein: trna (guanine-n -)-methyltransferase-like	IPR003402|IPR025792	tRNA transferase Trm5/Tyw2|tRNA (guanine(37)-N(1))-methyltransferase, eukaryotic	GO:0016740|GO:0009019|GO:0030488	NULL	NULL
Dr04098	GO:0031167|GO:0000179	NULL	ribosomal rna adenine dimethylase family protein	IPR001737|IPR020598|IPR011530|IPR025814|IPR020596	Ribosomal RNA adenine methylase transferase|Ribosomal RNA adenine methylase transferase, N-terminal|Ribosomal RNA adenine dimethylase|18S rRNA dimethylase DIM1|Ribosomal RNA adenine methylase transferase, conserved site	GO:0000154|GO:0000179|GO:0008649|GO:0006364|GO:0016433	NULL	NULL
Dr04109	GO:0009536|GO:0016020	NULL	protein	NULL	NULL	NULL	NULL	NULL
Dr04120	NULL	NULL	NULL	IPR018609	Bud13	NULL	NULL	NULL
Dr04137	NULL	NULL	NULL	IPR003877|IPR024964|IPR008985|IPR018355|IPR006595|IPR013144|IPR001870	SPla/RYanodine receptor SPRY|CTLH/CRA C-terminal to LisH motif domain|Concanavalin A-like lectin/glucanases superfamily|SPla/RYanodine receptor subgroup|CTLH, C-terminal LisH motif|CRA domain|B30.2/SPRY domain	GO:0005515	NULL	NULL
Dr04140	GO:0012505|GO:0010118|GO:0015743|GO:0009507|GO:0008270|GO:0008509	NULL	uncharacterized protein	IPR024644|IPR006571	Interferon-induced protein 44 family|TLDc	NULL	NULL	NULL
Dr04141	GO:0009536	NULL	proline-rich family protein	NULL	NULL	NULL	NULL	NULL
Dr04143	GO:0006312|GO:0007131|GO:0032390|GO:0032407|GO:0030983|GO:0005712|GO:0003697|GO:0000795|GO:0009845|GO:0009555|GO:0000790|GO:0016887|GO:0006200|GO:0032389|GO:0006298|GO:0005524|GO:0048316	EC:3.6.1.3	dna mismatch repair protein mlh1	IPR002099|IPR011186|IPR013507|IPR020568|IPR003594|IPR014721|IPR014763|IPR014762	DNA mismatch repair protein|DNA mismatch repair protein Mlh1|DNA mismatch repair protein, C-terminal|Ribosomal protein S5 domain 2-type fold|Histidine kinase-like ATPase, ATP-binding domain|Ribosomal protein S5 domain 2-type fold, subgroup|DNA mismatch repair protein, N-terminal|DNA mismatch repair, conserved site	GO:0005524|GO:0006298|GO:0030983|GO:0005634	NULL	NULL
Dr04107	GO:0005739|GO:0009706	NULL	uncharacterized protein	IPR021825	Protein of unknown function DUF3411, plant	NULL	NULL	NULL
Dr04166	GO:0005739|GO:0008270	NULL	uncharacterized protein	IPR003788	Putative S-adenosyl-L-methionine-dependent methyltransferase MidA	NULL	NULL	NULL
Dr04160	NULL	NULL	NULL	NULL	NULL	NULL	NULL	NULL
Dr04196	GO:0005794|GO:0010105|GO:0016021|GO:0005783	NULL	green ripe-like 1	IPR008496	Protein of unknown function DUF778	NULL	NULL	NULL
Dr04208	GO:0003676|GO:0046872	NULL	zinc finger ccch domain-containing protein 64	IPR006767|IPR006768|IPR011146|IPR000571	Cwf19-like protein, C-terminal domain-2|Cwf19-like, C-terminal domain-1|HIT-like domain|Zinc finger, CCCH-type	GO:0003824|GO:0046872	NULL	NULL
Dr04225	NULL	NULL	NULL	IPR007807|IPR013562|IPR000182	Helicase domain|Domain of unknown function DUF1726|GNAT domain	GO:0008080	NULL	NULL
Dr04233	GO:0016568|GO:0044260|GO:0008080|GO:0044424|GO:0042967	NULL	histone acetyltransferase type b catalytic subunit	IPR017380|IPR000182|IPR016181	Histone acetyltransferase type B, catalytic subunit|GNAT domain|Acyl-CoA N-acyltransferase	GO:0004402|GO:0005634|GO:0006348|GO:0016573|GO:0008080	NULL	NULL
Dr04223	GO:0009536	NULL	pentatricopeptide repeat-containing protein	IPR001229|IPR002885|IPR011990	Mannose-binding lectin|Pentatricopeptide repeat|Tetratricopeptide-like helical	GO:0005515	NULL	NULL
Dr04258	GO:0003824|GO:0005622	NULL	cyclic phosphodiesterase	IPR012386|IPR009097	2',3'-cyclic-nucleotide 3'-phosphodiesterase|RNA ligase/cyclic nucleotide phosphodiesterase	GO:0004112|GO:0003824	NULL	NULL
Dr04261	GO:0016310|GO:0004672|GO:0000166	NULL	lrr receptor-like serine threonine-protein kinase	IPR001611|IPR001245|IPR021720|IPR011009|IPR013320|IPR002290|IPR000719|IPR017441|IPR008271	Leucine-rich repeat|Serine-threonine/tyrosine-protein kinase catalytic domain|Malectin|Protein kinase-like domain|Concanavalin A-like lectin/glucanase, subgroup|Serine/threonine- / dual specificity protein kinase, catalytic domain|Protein kinase domain|Protein kinase, ATP binding site|Serine/threonine-protein kinase, active site	GO:0005515|GO:0004672|GO:0006468|GO:0016772|GO:0005524|GO:0004674	NULL	NULL
Dr04301	GO:0016491|GO:0016740|GO:0016020|GO:0008270	NULL	probable s-acyltransferase at2g14255-like	IPR001594|IPR020683|IPR002110	Zinc finger, DHHC-type, palmitoyltransferase|Ankyrin repeat-containing domain|Ankyrin repeat	GO:0008270|GO:0005515	NULL	NULL
Dr04302	GO:0043234|GO:0044430|GO:0000166|GO:0015630	NULL	chromosome-associated kinesin	IPR027640|IPR001752|IPR027417	Kinesin-like protein|Kinesin, motor domain|P-loop containing nucleoside triphosphate hydrolase	GO:0003777|GO:0005871|GO:0007018|GO:0005524|GO:0008017	NULL	NULL
Dr04304	GO:0008565|GO:0016192|GO:0006886|GO:0030123	NULL	ap-3 complex subunit sigma-2	IPR016635|IPR027155|IPR022775|IPR011012|IPR000804	Adaptor protein complex, sigma subunit|AP-3 complex subunit sigma|AP complex, mu/sigma subunit|Longin-like domain|Clathrin adaptor complex, small chain	GO:0008565|GO:0015031|GO:0030123|GO:0006810|GO:0006886|GO:0016192|GO:0030117	NULL	NULL
Dr04243	GO:0005886|GO:0004579|GO:0009651|GO:0008250|GO:0018279	EC:2.4.1.119	dolichyl-diphosphooligosaccharide--protein glycosyltransferase subunit stt3-like	IPR003674	Oligosaccharyl transferase, STT3 subunit	GO:0004576|GO:0006486|GO:0016020	NULL	UniPathway: UPA00378
Dr04245	NULL	NULL	NULL	IPR002942	RNA-binding S4 domain	GO:0003723	NULL	NULL
Dr04259	GO:0016021|GO:0009706	NULL	uncharacterized membrane protein sll0875-like	IPR002794	Protein of unknown function DUF92, TMEM19	GO:0016021	NULL	NULL
Dr04265	GO:0006541|GO:0034722	EC:3.4.19.9	gamma-glutamyl hydrolase 2	IPR015527|IPR011697	Peptidase C26, gamma-glutamyl hydrolase|Peptidase C26	GO:0003824|GO:0006541|GO:0008242|GO:0016787	EC:3.4.19.9	KEGG: 00790+3.4.19.9|MetaCyc: PWY-2161B|MetaCyc: PWY-4061|MetaCyc: PWY-6842|MetaCyc: PWY-7112
Dr17397	GO:0009536	NULL	protein	IPR012932|IPR012336	Vitamin K epoxide reductase|Thioredoxin-like fold	NULL	NULL	NULL
Dr17405	GO:0016491|GO:0016836|GO:0055114	EC:4.2.1.0	enoyl- hydratase peroxisomal-like	IPR027090	Enoyl-CoA hydratase 2	NULL	NULL	MetaCyc: PWY-5138|MetaCyc: PWY-6657
Dr17413	GO:0010388	NULL	cop9 signalosome complex subunit 2-like	IPR000717|IPR011991|IPR011990|IPR013143	Proteasome component (PCI) domain|Winged helix-turn-helix DNA-binding domain|Tetratricopeptide-like helical|PCI/PINT associated module	GO:0005515	NULL	NULL
Dr17459	NULL	NULL	NULL	IPR000408|IPR009091	Regulator of chromosome condensation, RCC1|Regulator of chromosome condensation 1/beta-lactamase-inhibitor protein II	NULL	NULL	NULL
Dr17473	GO:0009536	NULL	uncharacterized protein	IPR006968	Vitamin B6 photo-protection and homoeostasis	NULL	NULL	NULL
Dr17474	NULL	NULL	NULL	IPR001680|IPR024761|IPR024764|IPR017986|IPR015943	WD40 repeat|Transcription factor IIIC, 90kDa subunit, N-terminal|Transcription factor IIIC, putative zinc-finger|WD40-repeat-containing domain|WD40/YVTN repeat-like-containing domain	GO:0005515	NULL	NULL
Dr17486	GO:0003743|GO:0003746|GO:0006452|GO:0034050|GO:0005739|GO:0042742|GO:0009611|GO:0008612|GO:0045905|GO:0043022|GO:0010089|GO:0045901|GO:0046686|GO:0005634|GO:0005840|GO:0006446	NULL	eukaryotic translation initiation factor 5a3	IPR001884|IPR001680|IPR020189|IPR008991|IPR012340|IPR011047|IPR015943|IPR014722|IPR017986|IPR019769	Translation elongation factor IF5A|WD40 repeat|Translation elongation factor, IF5A C-terminal|Translation protein SH3-like domain|Nucleic acid-binding, OB-fold|Quinonprotein alcohol dehydrogenase-like superfamily|WD40/YVTN repeat-like-containing domain|Ribosomal protein L2 domain 2|WD40-repeat-containing domain|Translation elongation factor, IF5A, hypusine site	GO:0003723|GO:0003746|GO:0008612|GO:0043022|GO:0045901|GO:0045905|GO:0005515|GO:0006452	NULL	NULL
Dr17492	GO:0005488|GO:0043229	NULL	origin recognition complex subunit 5-like	IPR020796|IPR027417	Origin recognition complex, subunit 5|P-loop containing nucleoside triphosphate hydrolase	GO:0000808|GO:0005634|GO:0006260	NULL	NULL
Dr17432	GO:0016020	NULL	upf0451 protein c17orf61 homolog	IPR006696	Protein of unknown function DUF423	NULL	NULL	NULL
Dr17440	GO:0005744|GO:0015031	NULL	mitochondrial import inner membrane translocase subunit tim50-like	IPR027111|IPR004274|IPR023214	Mitochondrial import inner membrane translocase subunit Tim50|NLI interacting factor|HAD-like domain	GO:0005743|GO:0005744|GO:0015031|GO:0005515	NULL	NULL
Dr17451	GO:0046872|GO:0006813|GO:0009705|GO:0005242|GO:0031004|GO:0030007|GO:0008076	NULL	outward-rectifying potassium channel	IPR013099|IPR011992|IPR003280|IPR002048|IPR018247	Two pore domain potassium channel domain|Two pore domain potassium channel|EF-hand domain pair|EF-hand domain|EF-Hand 1, calcium-binding site	GO:0005509|GO:0005267|GO:0016020|GO:0071805	NULL	NULL
Dr17457	GO:0044424	NULL	nucleolar protein 14-like	IPR007276	Nucleolar protein 14	GO:0032040	NULL	NULL
Dr17468	GO:0004713|GO:0006468|GO:0005524|GO:0043229|GO:0004674|GO:0009069	EC:2.7.10.0|EC:2.7.11.0	serine threonine kinase	IPR000719|IPR019351|IPR011009|IPR002290|IPR017441	Protein kinase domain|Protein of unknown function DUF2039|Protein kinase-like domain|Serine/threonine- / dual specificity protein kinase, catalytic domain|Protein kinase, ATP binding site	GO:0004672|GO:0005524|GO:0006468|GO:0016772	NULL	NULL
Dr17471	GO:0017111|GO:0005524	EC:3.6.1.15	cell division control protein	IPR003959|IPR027417|IPR003593|IPR003960	ATPase, AAA-type, core|P-loop containing nucleoside triphosphate hydrolase|AAA+ ATPase domain|ATPase, AAA-type, conserved site	GO:0005524|GO:0000166|GO:0017111	NULL	NULL
Dr17477	GO:0007062|GO:0000003|GO:0005739	NULL	cohesin loading factor subunit scc2	IPR026003|IPR024986|IPR016024|IPR011011|IPR011989|IPR013083|IPR001965|IPR019786	HEAT repeat associated with sister chromatid cohesion protein|Sister chromatid cohesion C-terminal domain|Armadillo-type fold|Zinc finger, FYVE/PHD-type|Armadillo-like helical|Zinc finger, RING/FYVE/PHD-type|Zinc finger, PHD-type|Zinc finger, PHD-type, conserved site	GO:0005488|GO:0005515|GO:0008270	NULL	NULL
Dr17487	GO:0008652|GO:0016740	NULL	aspartate glutamate uridylate kinase family protein	IPR001048	Aspartate/glutamate/uridylate kinase	NULL	NULL	Reactome: REACT_13
Dr17491	GO:0016020	NULL	uncharacterized membrane protein ylr241w-like	IPR003864	Domain of unknown function DUF221	GO:0016020	NULL	NULL
Dr17511	GO:0009737|GO:0003723|GO:0009507	NULL	chloroplastic group iia intron splicing facilitator crs1	IPR001890	RNA-binding, CRM domain	GO:0003723	NULL	NULL
Dr17512	GO:0003723|GO:0009737|GO:0009507	NULL	chloroplastic group iia intron splicing facilitator chloroplastic-like	IPR001890	RNA-binding, CRM domain	GO:0003723	NULL	NULL
Dr25288	GO:0006891|GO:0017119|GO:0009536	NULL	conserved oligomeric golgi complex subunit 5-like	IPR019465	Conserved oligomeric Golgi complex subunit 5	GO:0006891|GO:0017119	NULL	NULL
Dr17539	GO:0008152|GO:0016772	NULL	probable inactive leucine-rich repeat receptor-like protein kinase at3g03770-like	IPR000719|IPR001611|IPR011009|IPR013320|IPR003591	Protein kinase domain|Leucine-rich repeat|Protein kinase-like domain|Concanavalin A-like lectin/glucanase, subgroup|Leucine-rich repeat, typical subtype	GO:0004672|GO:0005524|GO:0006468|GO:0005515|GO:0016772	NULL	NULL
Dr17549	NULL	NULL	NULL	IPR001012|IPR006041|IPR012336	UBX|Pollen Ole e 1 allergen/extensin|Thioredoxin-like fold	GO:0005515	NULL	NULL
Dr17560	NULL	NULL	NULL	IPR019410	Nicotinamide N-methyltransferase-like	NULL	NULL	NULL
Dr17535	NULL	NULL	NULL	IPR006909|IPR006910|IPR023093	Rad21/Rec8-like protein, C-terminal, eukaryotic|Rad21/Rec8-like protein, N-terminal|Rad21/Rec8-like protein, C-terminal	GO:0000228|GO:0005515	NULL	NULL
Dr17538	GO:0006783|GO:0005743|GO:0004729|GO:0009706|GO:0015994	EC:1.3.3.4	mitochondrial protoporphyrinogen oxidase	IPR002937|IPR027418	Amine oxidase|Protoporphyrinogen oxidase, C-terminal domain	GO:0016491|GO:0055114	EC:1.3.3.4	KEGG: 00860+1.3.3.4|MetaCyc: PWY-5531|MetaCyc: PWY-7159|UniPathway: UPA00251
Dr17561	GO:0016020|GO:0008152	NULL	gamma-secretase subunit aph-1b	IPR009294	Gamma-secretase subunit Aph-1	GO:0016021|GO:0016485|GO:0043085	NULL	Reactome: REACT_11061|Reactome: REACT_299
Dr17562	GO:0017111|GO:0005524	EC:3.6.1.15	atpase family aaa domain-containing protein 2b-like	IPR003959|IPR001487|IPR027417|IPR003593|IPR003960	ATPase, AAA-type, core|Bromodomain|P-loop containing nucleoside triphosphate hydrolase|AAA+ ATPase domain|ATPase, AAA-type, conserved site	GO:0005524|GO:0005515|GO:0000166|GO:0017111	NULL	NULL
Dr17656	GO:0030127|GO:0006886|GO:0006888|GO:0008270|GO:0009536	NULL	protein transport protein sec23	IPR006895|IPR006896|IPR006900|IPR012990|IPR002035	Zinc finger, Sec23/Sec24-type|Sec23/Sec24, trunk domain|Sec23/Sec24, helical domain|Sec23/Sec24 beta-sandwich|von Willebrand factor, type A	GO:0006886|GO:0006888|GO:0008270|GO:0030127	NULL	Reactome: REACT_11123
Dr17611	GO:0016787|GO:0009536	NULL	thioesterase-like protein	NULL	NULL	NULL	NULL	NULL
Dr17657	GO:0009646|GO:0017038|GO:0010090|GO:0010109|GO:0009941|GO:0009658|GO:0006605|GO:0005524|GO:0009535|GO:0009570	NULL	protein translocase subunit chloroplastic-like	IPR011130|IPR011116|IPR011115|IPR027417|IPR000185|IPR014018|IPR020937	SecA preprotein, cross-linking domain|SecA Wing/Scaffold|SecA DEAD-like, N-terminal|Protein translocase subunit SecA|P-loop containing nucleoside triphosphate hydrolase|SecA motor DEAD|SecA conserved site	GO:0016020|GO:0017038|GO:0005524|GO:0006605|GO:0006886	NULL	NULL
Dr17667	GO:0005840|GO:0009941|GO:0003735|GO:0006412|GO:0019843|GO:0042254	NULL	50s ribosomal protein l18	IPR005484	Ribosomal protein L18/L5	GO:0003735|GO:0005622|GO:0005840|GO:0006412	NULL	NULL
Dr17672	NULL	NULL	NULL	IPR007053|IPR000064	LRAT-like domain|Endopeptidase, NLPC/P60 domain	NULL	NULL	NULL
Dr17621	NULL	NULL	NULL	IPR007196|IPR024557	CCR4-Not complex component, Not1, C-terminal|CCR4-Not complex, Not1 subunit, domain of unknown function DUF3819	NULL	NULL	NULL
Dr17635	GO:0015031|GO:0005737|GO:0006914	NULL	autophagy-related protein 3	IPR007134|IPR007135|IPR019461	Autophagy-related protein 3, N-terminal|Autophagy-related protein 3|Autophagy-related protein 3, C-terminal	NULL	NULL	NULL
Dr17658	GO:0046872	NULL	probable s-acyltransferase at4g01730-like	IPR001594	Zinc finger, DHHC-type, palmitoyltransferase	GO:0008270	NULL	NULL
Dr17624	GO:0005198|GO:0009507	NULL	at4g00030-like protein	IPR006843	Plastid lipid-associated protein/fibrillin conserved domain	GO:0005198|GO:0009507	NULL	NULL
Dr17690	GO:0005739|GO:0016772	NULL	lectin-domain containing receptor kinase	NULL	NULL	NULL	NULL	NULL
Dr04356	GO:0005829|GO:0004000|GO:0043103|GO:0009168|GO:0006154|GO:0046103	EC:3.5.4.4	adenosine deaminase	IPR001365	Adenosine/AMP deaminase domain	GO:0009168|GO:0019239	NULL	NULL
Dr04357	GO:0016298|GO:0016042	NULL	galactolipase phospholipase	IPR000225|IPR001611|IPR002641|IPR016024|IPR016035|IPR011989|IPR003591	Armadillo|Leucine-rich repeat|Patatin/Phospholipase A2-related|Armadillo-type fold|Acyl transferase/acyl hydrolase/lysophospholipase|Armadillo-like helical|Leucine-rich repeat, typical subtype	GO:0005515|GO:0006629|GO:0005488|GO:0008152	NULL	NULL
Dr04390	GO:0005777|GO:0003987|GO:0006083|GO:0005739|GO:0006097|GO:0008756|GO:0006094|GO:0006096|GO:0019643|GO:0006744	EC:6.2.1.1|EC:6.2.1.26	amp dependent	IPR000873|IPR025110|IPR020845	AMP-dependent synthetase/ligase|AMP-binding enzyme C-terminal domain|AMP-binding, conserved site	GO:0003824|GO:0008152	NULL	NULL
Dr04408	GO:0016023	NULL	protein	NULL	NULL	NULL	NULL	NULL
Dr04411	NULL	NULL	NULL	IPR026057	PC-Esterase	NULL	NULL	NULL
Dr04367	GO:0046872|GO:0004386|GO:0003676|GO:0005622|GO:0000166	NULL	zinc finger ccch domain-containing protein 31	IPR011545|IPR001650|IPR000571|IPR027417|IPR014001	DNA/RNA helicase, DEAD/DEAH box type, N-terminal|Helicase, C-terminal|Zinc finger, CCCH-type|P-loop containing nucleoside triphosphate hydrolase|Helicase, superfamily 1/2, ATP-binding domain	GO:0003676|GO:0005524|GO:0008026|GO:0004386|GO:0046872	NULL	NULL
Dr04374	GO:0050660|GO:0048767|GO:0003995|GO:0016772|GO:0055114|GO:0006118	EC:1.3.99.3	acyl- dehydrogenase	IPR009075|IPR002575|IPR006091|IPR013786|IPR011009|IPR009100	Acyl-CoA dehydrogenase/oxidase C-terminal|Aminoglycoside phosphotransferase|Acyl-CoA oxidase/dehydrogenase, central domain|Acyl-CoA dehydrogenase/oxidase, N-terminal|Protein kinase-like domain|Acyl-CoA dehydrogenase/oxidase, N-terminal and middle domain	GO:0016627|GO:0055114|GO:0003995|GO:0008152|GO:0050660|GO:0016772	NULL	NULL
Dr04380	GO:0005829|GO:0003723|GO:0006278|GO:0003964|GO:0004176|GO:0003677|GO:0005524|GO:0005759|GO:0004252|GO:0009507|GO:0006515|GO:0006510	EC:2.7.7.49|EC:3.4.21.0	lon protease homolog mitochondrial-like	IPR027065|IPR003959|IPR003111|IPR008269|IPR027417|IPR020568|IPR014721|IPR003593|IPR004815|IPR008268|IPR027503	Lon protease|ATPase, AAA-type, core|Peptidase S16, lon N-terminal|Peptidase S16, Lon C-terminal|P-loop containing nucleoside triphosphate hydrolase|Ribosomal protein S5 domain 2-type fold|Ribosomal protein S5 domain 2-type fold, subgroup|AAA+ ATPase domain|Lon protease, bacterial/eukaryotic-type|Peptidase S16, active site|Lon protease homolog, chloroplastic/mitochondrial	GO:0004176|GO:0004252|GO:0005524|GO:0030163|GO:0006508|GO:0000166|GO:0017111|GO:0006515	NULL	NULL
Dr04438	GO:0031957|GO:0010025|GO:0010143	NULL	long chain acyl- synthetase 1	IPR000873|IPR020845	AMP-dependent synthetase/ligase|AMP-binding, conserved site	GO:0003824|GO:0008152	NULL	NULL
Dr04439	NULL	NULL	NULL	IPR008395|IPR014002	Agenet-like domain|Tudor-like, plant	NULL	NULL	NULL
Dr04450	NULL	NULL	NULL	IPR001525	C-5 cytosine methyltransferase	GO:0003677|GO:0006306|GO:0008168	EC:2.1.1.37	KEGG: 00270+2.1.1.37
Dr04458	GO:0016310|GO:0004672	NULL	serine threonine-protein kinase haspin-like	IPR024604|IPR011009|IPR000719	Domain of unknown function DUF3635|Protein kinase-like domain|Protein kinase domain	GO:0016772|GO:0004672|GO:0005524|GO:0006468	NULL	NULL
Dr04442	GO:0005840|GO:0005777|GO:0042742|GO:0006364|GO:0009409|GO:0009941|GO:0007623|GO:0009658|GO:0000166|GO:0010287|GO:0050662|GO:0003824|GO:0005773|GO:0016020|GO:0010319|GO:0048046	NULL	rna binding protein	IPR016040	NAD(P)-binding domain	NULL	NULL	NULL
Dr04444	GO:0016887|GO:0000166	EC:3.6.1.3	abc transporter family protein	IPR003439|IPR027417|IPR003593	ABC transporter-like|P-loop containing nucleoside triphosphate hydrolase|AAA+ ATPase domain	GO:0005524|GO:0016887|GO:0000166|GO:0017111	NULL	NULL
Dr04447	GO:0050661|GO:0004345|GO:0006098|GO:0009536|GO:0006749	EC:1.1.1.49	glucose-6-phosphate dehydrogenase 4	IPR001282|IPR022674|IPR022675|IPR016040	Glucose-6-phosphate dehydrogenase|Glucose-6-phosphate dehydrogenase, NAD-binding|Glucose-6-phosphate dehydrogenase, C-terminal|NAD(P)-binding domain	GO:0004345|GO:0006006|GO:0055114|GO:0050661	EC:1.1.1.49	KEGG: 00030+1.1.1.49|KEGG: 00480+1.1.1.49|MetaCyc: PWY-7268|UniPathway: UPA00115
Dr04460	GO:0006796|GO:0005509|GO:0016787|GO:0009536|GO:0016772	NULL	gtp pyrophosphokinase	IPR007685|IPR011992|IPR002048|IPR018247	RelA/SpoT|EF-hand domain pair|EF-hand domain|EF-Hand 1, calcium-binding site	GO:0015969|GO:0005509	NULL	NULL
Dr04389	GO:0004674|GO:0097159|GO:0016310|GO:1901363|GO:0009069	EC:2.7.11.0	atp binding	IPR000719|IPR000048|IPR005559|IPR020683|IPR016024|IPR027417|IPR011009|IPR014756|IPR011989|IPR000225|IPR002290|IPR002110|IPR017441|IPR008271	Protein kinase domain|IQ motif, EF-hand binding site|CG-1 DNA-binding domain|Ankyrin repeat-containing domain|Armadillo-type fold|P-loop containing nucleoside triphosphate hydrolase|Protein kinase-like domain|Immunoglobulin E-set|Armadillo-like helical|Armadillo|Serine/threonine- / dual specificity protein kinase, catalytic domain|Ankyrin repeat|Protein kinase, ATP binding site|Serine/threonine-p…	GO:0004672|GO:0005524|GO:0006468|GO:0005515|GO:0003677|GO:0005634|GO:0005488|GO:0016772|GO:0004674	NULL	NULL
Dr04433	GO:0016853|GO:0009507	NULL	nhl repeat-containing protein 2-like	IPR001258|IPR023214|IPR012336|IPR011042|IPR006439|IPR013017	NHL repeat|HAD-like domain|HAD hydrolase, subfamily IA|Thioredoxin-like fold|Six-bladed beta-propeller, TolB-like|NHL repeat, subgroup	GO:0005515|GO:0008152|GO:0016787	NULL	NULL
Dr04412	GO:0044238|GO:0044260|GO:0009536|GO:0044699	NULL	enhancer of	IPR001214|IPR009057|IPR025778	SET domain|Homeodomain-like|Histone-lysine N-methyltransferase, EZ	GO:0005515|GO:0003677|GO:0031519	EC:2.1.1.43	KEGG: 00310+2.1.1.43
Dr04476	NULL	NULL	NULL	NULL	NULL	NULL	NULL	NULL
Dr04468	GO:0016023|GO:0009535	NULL	soul heme-binding protein	IPR006917|IPR018790|IPR011256	SOUL haem-binding protein|Protein of unknown function DUF2358|Regulatory factor, effector binding domain	NULL	NULL	NULL
Dr04493	NULL	NULL	NULL	IPR001357	BRCT domain	NULL	NULL	NULL
Dr04528	GO:0005743|GO:0033615	NULL	uncharacterized protein	IPR007849	ATPase assembly factor ATP10, mitochondria	GO:0005743|GO:0033615	NULL	NULL
Dr04533	GO:0005507|GO:0055114|GO:0005739|GO:0009651|GO:0006355|GO:0009505|GO:0043565|GO:0003700|GO:0004128|GO:0005667|GO:0045449|GO:0006040|GO:0006118	EC:1.6.2.2	nadh-cytochrome b5 reductase-like protein	IPR001433|IPR008333|IPR017938|IPR001709|IPR001834|IPR017927	Oxidoreductase FAD/NAD(P)-binding|Oxidoreductase, FAD-binding domain|Flavoprotein pyridine nucleotide cytochrome reductase|NADH:cytochrome b5 reductase (CBR)|Riboflavin synthase-like beta-barrel|Ferredoxin reductase-type FAD-binding domain	GO:0016491|GO:0055114	NULL	NULL
Dr04515	GO:0003904|GO:1901363|GO:0003914|GO:0097159|GO:0009411|GO:0006281	EC:4.1.99.3|EC:4.1.99.13	6-4 photolyase	IPR006050|IPR005101|IPR014729	DNA photolyase, N-terminal|DNA photolyase, FAD-binding/Cryptochrome, C-terminal|Rossmann-like alpha/beta/alpha sandwich fold	GO:0003913|GO:0006281	NULL	NULL
Dr17701	NULL	NULL	NULL	IPR006073|IPR027417|IPR023179	GTP binding domain|P-loop containing nucleoside triphosphate hydrolase|GTP-binding protein, orthogonal bundle domain	GO:0005525	NULL	NULL
Dr17705	GO:0006468|GO:0005739|GO:0009651|GO:0009705|GO:0005524|GO:0007165|GO:0004683|GO:0009069	EC:2.7.11.17	cbl-interacting serine threonine-protein kinase 24	IPR000719|IPR004041|IPR011009|IPR002290|IPR018451|IPR017441|IPR008271	Protein kinase domain|NAF domain|Protein kinase-like domain|Serine/threonine- / dual specificity protein kinase, catalytic domain|NAF/FISL domain|Protein kinase, ATP binding site|Serine/threonine-protein kinase, active site	GO:0004672|GO:0005524|GO:0006468|GO:0007165|GO:0016772|GO:0004674	NULL	NULL
Dr17766	GO:0017111|GO:0016020	EC:3.6.1.15	abc transporter g family member 22	IPR003439|IPR013525|IPR027417|IPR003593|IPR017871	ABC transporter-like|ABC-2 type transporter|P-loop containing nucleoside triphosphate hydrolase|AAA+ ATPase domain|ABC transporter, conserved site	GO:0005524|GO:0016887|GO:0016020|GO:0000166|GO:0017111	NULL	NULL
Dr17768	GO:0007018|GO:0005875|GO:0005524|GO:0003777|GO:0005874	NULL	kinesin-like protein	IPR027640|IPR001752|IPR024658|IPR027417|IPR019821	Kinesin-like protein|Kinesin, motor domain|Kinesin-like, KLP2|P-loop containing nucleoside triphosphate hydrolase|Kinesin, motor region, conserved site	GO:0003777|GO:0005871|GO:0007018|GO:0005524|GO:0008017	NULL	NULL
Dr04571	NULL	NULL	NULL	IPR003832	Acid phosphatase/vanadium-dependent haloperoxidase-related	NULL	NULL	NULL
Dr04576	NULL	NULL	NULL	IPR010828|IPR023213	Alcohol acetyltransferase|Chloramphenicol acetyltransferase-like domain	GO:0004026|GO:0006066	NULL	NULL
Dr04585	GO:0005739	NULL	3-deoxy-d-manno-octulosonic-acid transferase	IPR007507	3-deoxy-D-manno-octulosonic-acid transferase, N-terminal	NULL	EC:2.4.99.12	KEGG: 00540+2.4.99.12|UniPathway: UPA00958
Dr04551	GO:0003676|GO:0046872	NULL	zinc finger ccch domain-containing protein 51	IPR000571|IPR013083|IPR001841|IPR017907	Zinc finger, CCCH-type|Zinc finger, RING/FYVE/PHD-type|Zinc finger, RING-type|Zinc finger, RING-type, conserved site	GO:0046872|GO:0005515|GO:0008270	NULL	NULL
Dr04564	GO:0006468|GO:0004674|GO:0044699|GO:0005524|GO:0004713|GO:0044444|GO:0009069	EC:2.7.11.0|EC:2.7.10.0	serine threonine-protein kinase sepa-like	IPR000719|IPR016024|IPR011009|IPR011989|IPR000225|IPR002290|IPR017441|IPR008271	Protein kinase domain|Armadillo-type fold|Protein kinase-like domain|Armadillo-like helical|Armadillo|Serine/threonine- / dual specificity protein kinase, catalytic domain|Protein kinase, ATP binding site|Serine/threonine-protein kinase, active site	GO:0004672|GO:0005524|GO:0006468|GO:0005488|GO:0016772|GO:0005515|GO:0004674	NULL	NULL
Dr04573	NULL	NULL	NULL	IPR007188|IPR001301	ARP2/3 complex, 34kDa subunit (p34-Arc)|Geminivirus AL1 replication-associated protein, CLV type	GO:0005856|GO:0030833|GO:0005198|GO:0019028	EC:2.7.7.-	KEGG: 00520+2.7.7.-
Dr04592	GO:0020037|GO:0016023	NULL	membrane-associated progesterone binding protein 4	IPR001199	Cytochrome b5-like heme/steroid binding domain	GO:0020037	NULL	NULL
Dr04605	GO:0005739	NULL	uncharacterized protein hi_0077-like	IPR007402|IPR009078	Protein of unknown function DUF455|Ferritin-like superfamily	NULL	NULL	NULL
Dr04613	GO:0000325|GO:0005886|GO:0055085|GO:0005774|GO:0005509|GO:0016021	NULL	sodium calcium exchanger family protein	IPR004837|IPR011992|IPR002048|IPR018247	Sodium/calcium exchanger membrane region|EF-hand domain pair|EF-hand domain|EF-Hand 1, calcium-binding site	GO:0016021|GO:0055085|GO:0005509	NULL	Reactome: REACT_15518
Dr04624	GO:0016757|GO:0016020	NULL	callose synthase	IPR026953|IPR003440|IPR026899	Callose synthase|Glycosyl transferase, family 48|1,3-beta-glucan synthase subunit FKS1-like, domain-1	GO:0003843|GO:0000148|GO:0006075|GO:0016020	EC:2.4.1.34	KEGG: 00500+2.4.1.34|MetaCyc: PWY-6773
Dr04634	GO:0005739	NULL	uncharacterized protein	IPR006852	Protein of unknown function DUF616	NULL	NULL	NULL
Dr18103	GO:0009941|GO:0016491|GO:0051537|GO:0009535|GO:0055114	NULL	rieske domain containing expressed	IPR023329|IPR017941	Chlorophyll a/b binding protein domain|Rieske [2Fe-2S] iron-sulphur domain	GO:0016491|GO:0051537|GO:0055114	NULL	NULL
Dr18118	GO:0005524|GO:0017111|GO:0009536	EC:3.6.1.15	uncharacterized protein ycf45-like	IPR003959|IPR027417|IPR003593	ATPase, AAA-type, core|P-loop containing nucleoside triphosphate hydrolase|AAA+ ATPase domain	GO:0005524|GO:0000166|GO:0017111	NULL	NULL
Dr18095	GO:0005739|GO:0097159|GO:1901363	NULL	apo protein 3	IPR023342	APO domain	GO:0003723	NULL	NULL
Dr18148	GO:0009624|GO:0030505|GO:0030504|GO:0055085|GO:0005315|GO:0031969|GO:0016021|GO:0009579|GO:0009416|GO:0006817	NULL	sodium-dependent phosphate transport protein	IPR011701|IPR016196|IPR020846	Major facilitator superfamily|Major facilitator superfamily domain, general substrate transporter|Major facilitator superfamily domain	GO:0016021|GO:0055085	NULL	NULL
Dr18149	GO:0009790|GO:0009846|GO:0003743|GO:0000502|GO:0016020|GO:0005634|GO:0005840|GO:0006446	NULL	26s proteasome regulatory subunit	IPR000555|IPR024969|IPR027531	JAB/MPN domain|Rpn11/EIF3F C-terminal domain|Eukaryotic translation initiation factor 3 subunit F	GO:0005515|GO:0003743|GO:0005737|GO:0005852	NULL	NULL
Dr18130	GO:0009536	NULL	uncharacterized protein	IPR006968	Vitamin B6 photo-protection and homoeostasis	NULL	NULL	NULL
Dr18192	GO:0022891|GO:0009536|GO:0044446|GO:0008643|GO:0016020	NULL	d-xylose-proton symporter-like chloroplastic-like	IPR005828|IPR016196|IPR003663|IPR020846|IPR005829	General substrate transporter|Sugar/inositol transporter|Major facilitator superfamily domain, general substrate transporter|Major facilitator superfamily domain|Sugar transporter, conserved site	GO:0016021|GO:0022857|GO:0055085|GO:0016020|GO:0022891|GO:0005215|GO:0006810	NULL	Reactome: REACT_15518
Dr18150	NULL	NULL	NULL	IPR003959|IPR027417|IPR003593	ATPase, AAA-type, core|P-loop containing nucleoside triphosphate hydrolase|AAA+ ATPase domain	GO:0005524|GO:0000166|GO:0017111	NULL	NULL
Dr18159	GO:0046510|GO:0009941|GO:0009247|GO:0016036	NULL	gdp-mannose-dependent alpha-mannosyltransferase-like	IPR001296	Glycosyl transferase, family 1	GO:0009058	NULL	NULL
Dr18170	NULL	NULL	NULL	IPR006873	Protein of unknown function DUF620	NULL	NULL	NULL
Dr18201	GO:0055069|GO:0009941|GO:0015633|GO:0009642|GO:0006816|GO:0009636|GO:0016021|GO:0006878|GO:0046872|GO:0015434|GO:0005388|GO:0006200|GO:0005524|GO:0006829|GO:0015691|GO:0016529	EC:3.6.3.46|EC:3.6.3.8	probable cadmium zinc-transporting atpase chloroplastic-like	IPR008250|IPR023214|IPR023299|IPR001757|IPR001878|IPR018303	P-type ATPase, A domain|HAD-like domain|P-type ATPase, cytoplasmic domain N|Cation-transporting P-type ATPase|Zinc finger, CCHC-type|P-type ATPase, phosphorylation site	GO:0000166|GO:0046872|GO:0006812|GO:0016021|GO:0019829|GO:0003676|GO:0008270	NULL	NULL
Dr18209	GO:0005739|GO:0004813|GO:0006419|GO:0046872|GO:0005524|GO:0009570|GO:0000049|GO:0016020|GO:0009793|GO:0006522|GO:0006531	EC:6.1.1.7	alanyl-trna synthetase	IPR002318|IPR018164|IPR018162|IPR009000|IPR018163|IPR018165|IPR023033	Alanine-tRNA ligase, class IIc|Alanyl-tRNA synthetase, class IIc, N-terminal|Alanine-tRNA ligase, class IIc, anti-codon-binding domain|Translation protein, beta-barrel domain|Threonyl/alanyl tRNA synthetase, class II-like, putative editing domain|Alanyl-tRNA synthetase, class IIc, core domain|Alanine-tRNA ligase, eukaryota/bacteria	GO:0000166|GO:0005737|GO:0004813|GO:0005524|GO:0006419|GO:0003676	EC:6.1.1.7	KEGG: 00970+6.1.1.7|Reactome: REACT_71|KEGG: 00970+6.1.1.7
Dr18206	GO:0008152|GO:0009536	NULL	chloroplastic group iia intron splicing facilitator chloroplastic-like	IPR001890	RNA-binding, CRM domain	GO:0003723	NULL	NULL
Dr18242	GO:0004623|GO:0009395	EC:3.1.1.4	phospholipase a2 family protein	IPR016090	Phospholipase A2 domain	NULL	EC:3.1.1.4	KEGG: 00564+3.1.1.4|KEGG: 00565+3.1.1.4|KEGG: 00590+3.1.1.4|KEGG: 00591+3.1.1.4|KEGG: 00592+3.1.1.4|MetaCyc: PWY-6803
Dr18249	GO:0016773|GO:0000166|GO:0016301|GO:0046496	EC:2.7.1.0	nad kinase 1	IPR002504|IPR016064|IPR017438	Inorganic polyphosphate/ATP-NAD kinase, predicted|ATP-NAD kinase-like domain|Inorganic polyphosphate/ATP-NAD kinase, domain 1	GO:0003951|GO:0006741|GO:0008152	EC:2.7.1.23	KEGG: 00760+2.7.1.23|MetaCyc: PWY-5083|MetaCyc: PWY-7268|MetaCyc: PWY-7269
Dr18306	GO:0009585|GO:0048573|GO:0010099|GO:0048366|GO:0005634	NULL	phytochrome a-associated f-box protein	NULL	NULL	NULL	NULL	NULL
Dr18264	NULL	NULL	NULL	IPR001680|IPR007148|IPR017986|IPR015943	WD40 repeat|Small-subunit processome, Utp12|WD40-repeat-containing domain|WD40/YVTN repeat-like-containing domain	GO:0005515	NULL	NULL
Dr18270	GO:0016787	NULL	protein	IPR002921|IPR005592	Lipase, class 3|Mono-/di-acylglycerol lipase, N-terminal	GO:0004806|GO:0006629|GO:0004091|GO:0016042	NULL	Reactome: REACT_14797|Reactome: REACT_604
Dr18309	NULL	NULL	NULL	IPR019002	Ribosome biogenesis protein Nop16	NULL	NULL	NULL
Dr18312	GO:0003779|GO:0008290|GO:0005634|GO:0030036	NULL	f-actin-capping protein subunit alpha	IPR002189|IPR017865	F-actin-capping protein subunit alpha|F-actin capping protein, alpha subunit, conserved site	GO:0003779|GO:0008290|GO:0030036|GO:0071203	NULL	NULL
Dr18255	GO:0044765|GO:0016020|GO:0009536	NULL	mitochondrial carrier	IPR018108|IPR023395|IPR002067	Mitochondrial substrate/solute carrier|Mitochondrial carrier protein|Mitochondrial carrier domain	GO:0055085	NULL	NULL
Dr04654	GO:0005739	NULL	protein	IPR008554|IPR012336	Glutaredoxin-like|Thioredoxin-like fold	NULL	NULL	NULL
Dr04655	NULL	NULL	NULL	IPR001810	F-box domain	GO:0005515	NULL	NULL
Dr04656	GO:0009536|GO:0008233	NULL	rhomboid-like protein 10	IPR002610|IPR022764	Peptidase S54, rhomboid|Peptidase S54, rhomboid domain	GO:0004252|GO:0006508|GO:0016021	NULL	NULL
Dr04695	GO:0005388|GO:0006310|GO:0006281|GO:0009432|GO:0009536|GO:0005524|GO:0003697|GO:0008094|GO:0006816|GO:0016529	EC:3.6.3.8	dna repair protein reca-like 1	IPR013765|IPR027417|IPR023400|IPR003593|IPR020588|IPR020587|IPR020584	DNA recombination and repair protein RecA|P-loop containing nucleoside triphosphate hydrolase|DNA recombination and repair protein RecA, C-terminal|AAA+ ATPase domain|DNA recombination/repair protein RecA/RadB, ATP-binding domain|DNA recombination/repair protein RecA, monomer-monomer interface|DNA recombination/repair protein RecA, conserved site	GO:0003697|GO:0005524|GO:0006281|GO:0009432|GO:0000166|GO:0017111|GO:0003677|GO:0006259|GO:0008094	NULL	NULL
Dr04696	NULL	NULL	NULL	NULL	NULL	NULL	NULL	NULL
Dr04720	GO:0005737|GO:0046836|GO:0010175|GO:0051861|GO:0009751|GO:0017089|GO:0008219|GO:0009816|GO:0015844|GO:0015850	NULL	protein	IPR014830	Glycolipid transfer protein domain	GO:0005737|GO:0017089|GO:0046836|GO:0051861	NULL	NULL
Dr04741	GO:0016020|GO:0044699|GO:0009536	NULL	ala-interacting subunit 2	IPR005045	Protein of unknown function DUF284, transmembrane eukaryotic	GO:0016020	NULL	NULL
Dr04763	NULL	NULL	NULL	IPR000096|IPR016024	Serum amyloid A protein|Armadillo-type fold	GO:0005576|GO:0006953|GO:0005488	NULL	NULL
Dr04722	NULL	NULL	NULL	IPR010719	Putative rRNA methylase	NULL	EC:2.1.1.-	KEGG: 00130+2.1.1.-|KEGG: 00253+2.1.1.-|KEGG: 00270+2.1.1.-|KEGG: 00340+2.1.1.-|KEGG: 00350+2.1.1.-|KEGG: 00360+2.1.1.-|KEGG: 00380+2.1.1.-|KEGG: 00450+2.1.1.-|KEGG: 00522+2.1.1.-|KEGG: 00624+2.1.1.-|KEGG: 00627+2.1.1.-|KEGG: 00860+2.1.1.-|KEGG: 00940+2.1.1.-|KEGG: 00941+2.1.1.-|KEGG: 00942+2.1.1.-|KEGG: 00945+2.1.1.-|KEGG: 00950+2.1.1.-|KEGG: 00981+2.1.1.-
Dr04750	GO:0006979|GO:0009753|GO:0008270|GO:0009414|GO:0009741|GO:0042538|GO:0009408|GO:0004587|GO:0009733|GO:0009737|GO:0055129|GO:0005759|GO:0009413|GO:0019544|GO:0030170|GO:0006593	EC:2.6.1.13	ornithine aminotransferase	IPR005814|IPR010164|IPR015424|IPR015421|IPR015422	Aminotransferase class-III|Ornithine aminotransferase|Pyridoxal phosphate-dependent transferase|Pyridoxal phosphate-dependent transferase, major region, subdomain 1|Pyridoxal phosphate-dependent transferase, major region, subdomain 2	GO:0008483|GO:0030170|GO:0003824	EC:2.6.1.13	KEGG: 00330+2.6.1.13|MetaCyc: PWY-3341|MetaCyc: PWY-4981|MetaCyc: PWY-6344|MetaCyc: PWY-6922|UniPathway: UPA00098
Dr18317	GO:0009536	NULL	fatty acyl- reductase 2-like	IPR026055|IPR013120|IPR016040	Fatty acyl-CoA reductase|Male sterility, NAD-binding|NAD(P)-binding domain	GO:0080019	NULL	Reactome: REACT_22258
Dr18318	GO:0016023	NULL	uncharacterized protein	IPR006873	Protein of unknown function DUF620	NULL	NULL	NULL
Dr18349	NULL	NULL	NULL	IPR003675	CAAX amino terminal protease	GO:0016020	NULL	NULL
Dr18341	NULL	NULL	NULL	IPR019156|IPR016024|IPR011989	Ataxin-10 domain|Armadillo-type fold|Armadillo-like helical	GO:0005488	NULL	NULL
Dr18343	NULL	NULL	NULL	IPR008862	T-complex 11	NULL	NULL	NULL
Dr18344	GO:0019509|GO:0005737|GO:0046523	EC:5.3.1.23	methylthioribose-1-phosphate isomerase	IPR000649|IPR027363	Initiation factor 2B-related|Methylthioribose-1-phosphate isomerase-like, N-terminal domain	GO:0044237	EC:5.3.1.23	KEGG: 00270+5.3.1.23|MetaCyc: PWY-6755|MetaCyc: PWY-7174|MetaCyc: PWY-7270|UniPathway: UPA00904
Dr18346	GO:0008270|GO:0005622	NULL	zinc finger family expressed	NULL	NULL	NULL	NULL	NULL
Dr18345	GO:0006779|GO:0004109|GO:0051536|GO:0009536|GO:0055114|GO:0015994	EC:1.3.3.3	oxygen-independent coproporphyrinogen iii oxidase	IPR007197|IPR023404|IPR006638|IPR004559	Radical SAM|Radical SAM, alpha/beta horseshoe|Elongator protein 3/MiaB/NifB|Coproporphyrinogen III oxidase, oxygen-independent related	GO:0003824|GO:0051536|GO:0004109|GO:0005737|GO:0006779|GO:0055114	EC:2.-.-.-	KEGG: 00231+2.-.-.-
Dr18347	NULL	NULL	NULL	IPR011498|IPR025183|IPR015915	Kelch repeat type 2|Domain of unknown function DUF4110|Kelch-type beta propeller	GO:0005515	NULL	NULL
Dr18361	GO:0000413|GO:0009507|GO:0003755|GO:0005739	EC:5.2.1.8	peptidyl-prolyl cis-trans isomerase c	IPR001763|IPR000297	Rhodanese-like domain|Peptidyl-prolyl cis-trans isomerase, PpiC-type	GO:0016853	NULL	NULL
Dr18396	NULL	NULL	NULL	IPR001478	PDZ domain	GO:0005515	NULL	NULL
Dr18397	GO:0008270|GO:0008559|GO:0016021|GO:0006200|GO:0005524|GO:0009507|GO:0006855	EC:3.6.3.44	abc transporter nda	IPR003439|IPR010509|IPR027417|IPR011527	ABC transporter-like|Peroxisomal fatty acyl CoA transporter, transmembrane domain|P-loop containing nucleoside triphosphate hydrolase|ABC transporter type 1, transmembrane domain	GO:0005524|GO:0016887|GO:0006810|GO:0016020|GO:0016021|GO:0042626|GO:0055085	NULL	NULL
Dr18437	GO:0015079|GO:0071805|GO:0016020	NULL	potassium transporter	IPR003855	K+ potassium transporter	GO:0015079|GO:0016020|GO:0071805	NULL	NULL
Dr04776	GO:0044464	NULL	cytochrome c-type biogenesis protein	IPR004329|IPR012340	CcmE/CycJ protein|Nucleic acid-binding, OB-fold	GO:0005886|GO:0017003|GO:0017004	NULL	NULL
Dr04789	GO:0016020|GO:0016023	NULL	uncharacterized membrane protein at3g27390-like	NULL	NULL	NULL	NULL	NULL
Dr04791	GO:0005945|GO:0009536|GO:0003872|GO:0008236|GO:0005524|GO:0006002|GO:0006096|GO:0016310|GO:0006000|GO:0006012|GO:0006013|GO:0006094|GO:0006098	EC:2.7.1.11	6-phosphofructokinase 2-like	IPR000023|IPR022953|IPR012004	Phosphofructokinase domain|Phosphofructokinase|Pyrophosphate-dependent phosphofructokinase TP0108	GO:0003872|GO:0005945|GO:0006096|GO:0006002|GO:0005524	EC:2.7.1.11	KEGG: 00010+2.7.1.11|KEGG: 00030+2.7.1.11|KEGG: 00051+2.7.1.11|KEGG: 00052+2.7.1.11|KEGG: 00680+2.7.1.11|MetaCyc: PWY-1042|MetaCyc: PWY-1861|MetaCyc: PWY-5484|Reactome: REACT_474|UniPathway: UPA00109|KEGG: 00010+2.7.1.11|KEGG: 00030+2.7.1.11|KEGG: 00051+2.7.1.11|KEGG: 00052+2.7.1.11|KEGG: 00680+2.7.1.11|MetaCyc: PWY-1042|MetaCyc: PWY-1861|MetaCyc: PWY-5484|UniPathway: UPA00109
Dr04827	NULL	NULL	NULL	IPR019339|IPR022209	CBF1-interacting co-repressor CIR, N-terminal domain|Pre-mRNA splicing factor	NULL	NULL	NULL
Dr04842	GO:0009987|GO:0015672|GO:0015077|GO:0030001|GO:0016020|GO:0015297	NULL	sodium hydrogen exchanger 6-like	IPR018422|IPR006153|IPR004709	Cation/H+ exchanger, CPA1 family|Cation/H+ exchanger|Na+/H+ exchanger	GO:0006812|GO:0015299|GO:0016021|GO:0055085|GO:0006814|GO:0006885|GO:0015385	NULL	Reactome: REACT_15518
Dr04810	GO:0016226|GO:0051536|GO:0005506|GO:0009570	NULL	protein	NULL	NULL	NULL	NULL	NULL
Dr04802	GO:0016757	NULL	cazy family gt8	IPR002495	Glycosyl transferase, family 8	GO:0016757	NULL	NULL
Dr04873	GO:0009987|GO:0005739|GO:0050513	EC:2.4.2.38	beta-( )-xylosyltransferase-like	IPR007657	Glycosyltransferase AER61, uncharacterised	GO:0016757	NULL	NULL
Dr04874	GO:0005739	NULL	protein	IPR013255	Chromosome segregation protein Spc25	NULL	NULL	NULL
Dr04880	GO:0016020|GO:0006508|GO:0009536|GO:0008236	NULL	peptidase s41 family protein	IPR001478|IPR005151|IPR004447	PDZ domain|Interphotoreceptor retinol-binding|C-terminal-processing peptidase S41A	GO:0005515|GO:0006508|GO:0008236	NULL	NULL
Dr04899	NULL	NULL	NULL	IPR017986|IPR015943|IPR001680|IPR019775	WD40-repeat-containing domain|WD40/YVTN repeat-like-containing domain|WD40 repeat|WD40 repeat, conserved site	GO:0005515	NULL	NULL
Dr04883	GO:0006468|GO:0005524|GO:0004674|GO:0009069	EC:2.7.11.0	serine threonine-protein kinase nek6-like	IPR000719|IPR011009|IPR002290|IPR017441|IPR008271	Protein kinase domain|Protein kinase-like domain|Serine/threonine- / dual specificity protein kinase, catalytic domain|Protein kinase, ATP binding site|Serine/threonine-protein kinase, active site	GO:0004672|GO:0005524|GO:0006468|GO:0016772|GO:0004674	NULL	NULL
Dr04904	NULL	NULL	NULL	NULL	NULL	NULL	NULL	NULL
Dr04911	NULL	NULL	NULL	IPR004827|IPR025422	Basic-leucine zipper domain|Transcription factor TGA like domain	GO:0003700|GO:0006355|GO:0043565|GO:0006351	NULL	NULL
Dr04934	GO:0005773|GO:0004046|GO:0010043|GO:0006520|GO:0006508|GO:0008237|GO:0000051	EC:3.5.1.14	peptidase m20 m25 m40 family protein	IPR002933|IPR011650|IPR010159|IPR001261	Peptidase M20|Peptidase M20, dimerisation domain|N-acyl-L-amino-acid amidohydrolase|ArgE/DapE/ACY1/CPG2/YscS, conserved site	GO:0008152|GO:0016787|GO:0004046|GO:0005737|GO:0006520|GO:0006508|GO:0008237	EC:3.5.1.14	KEGG: 00330+3.5.1.14
Dr18615	GO:0030170|GO:0004069|GO:0009536|GO:0016829|GO:0080130|GO:0000162|GO:0006107|GO:0006522|GO:0006525|GO:0006531|GO:0006534|GO:0006536|GO:0006560|GO:0006571|GO:0009094|GO:0009821|GO:0015976	EC:2.6.1.1	aminotransferase -like	IPR004839|IPR015424|IPR015421|IPR015422	Aminotransferase, class I/classII|Pyridoxal phosphate-dependent transferase|Pyridoxal phosphate-dependent transferase, major region, subdomain 1|Pyridoxal phosphate-dependent transferase, major region, subdomain 2	GO:0009058|GO:0030170|GO:0003824	NULL	NULL
Dr18661	NULL	NULL	NULL	IPR008493	Protein of unknown function DUF775	NULL	NULL	NULL
Dr18637	GO:0009507	NULL	rossmann-fold nad -binding domain-containing protein	IPR016040	NAD(P)-binding domain	NULL	NULL	NULL
Dr18643	GO:0046872|GO:0016574|GO:0009791|GO:0048608	NULL	e3 ubiquitin-protein ligase bre1-like 2	IPR013083|IPR001841|IPR017907	Zinc finger, RING/FYVE/PHD-type|Zinc finger, RING-type|Zinc finger, RING-type, conserved site	GO:0005515|GO:0008270	NULL	NULL
Dr18652	GO:0016772	NULL	uncharacterized aarf domain-containing protein kinase 1-like	IPR004147|IPR011009	UbiB domain|Protein kinase-like domain	GO:0016772	NULL	NULL
Dr18659	GO:0005507	NULL	cytochrome c oxidase assembly protein ctag	IPR007533|IPR023471	Cytochrome c oxidase assembly protein CtaG/Cox11|Cytochrome c oxidase assembly protein CtaG/Cox11, domain	GO:0005507	NULL	NULL
Dr18664	GO:0046030	NULL	type i inositol- -trisphosphate 5-phosphatase cvp2-like	IPR005135|IPR000300	Endonuclease/exonuclease/phosphatase|Inositol polyphosphate-related phosphatase	GO:0046856	NULL	NULL
Dr18636	GO:0007031|GO:0005777|GO:0046872|GO:0051641|GO:0044237	NULL	peroxisome biogenesis factor 10-like	IPR025654|IPR006845|IPR001841|IPR013083|IPR017907	Peroxisome biogenesis factor 10|Pex, N-terminal|Zinc finger, RING-type|Zinc finger, RING/FYVE/PHD-type|Zinc finger, RING-type, conserved site	GO:0005515|GO:0005779|GO:0007031|GO:0008270|GO:0016558	NULL	NULL
Dr18667	GO:0043167|GO:0016705|GO:0009536	NULL	2-oxoglutarate and fe -dependent oxygenase domain-containing protein	NULL	NULL	NULL	NULL	NULL
Dr18690	NULL	NULL	NULL	IPR001680|IPR011047|IPR015943|IPR020472|IPR017986	WD40 repeat|G-protein beta WD-40 repeat|Quinonprotein alcohol dehydrogenase-like superfamily|WD40/YVTN repeat-like-containing domain|WD40-repeat-containing domain	GO:0005515	NULL	NULL
Dr18646	NULL	NULL	NULL	NULL	NULL	NULL	NULL	NULL
Dr18714	NULL	NULL	NULL	IPR021752	Transcription initiation factor Rrn7	NULL	NULL	NULL
Dr18776	GO:0009536	NULL	f-box lrr-repeat protein 10-like	IPR001810|IPR006553	F-box domain|Leucine-rich repeat, cysteine-containing subtype	GO:0005515	NULL	NULL
Dr18754	GO:0097159|GO:0044435|GO:0010304|GO:0034256|GO:0015996|GO:0009579|GO:1901363|GO:0009507|GO:0016020	EC:1.1.1.294	short-chain dehydrogenase reductase sdr	IPR002198|IPR016040|IPR002347|IPR020904	Short-chain dehydrogenase/reductase SDR|Glucose/ribitol dehydrogenase|NAD(P)-binding domain|Short-chain dehydrogenase/reductase, conserved site	GO:0008152|GO:0016491	NULL	NULL
Dr18755	GO:0003723|GO:0004730|GO:0004672|GO:0016798|GO:0009536|GO:0043167|GO:0001522|GO:0000166|GO:0009982|GO:0006206	EC:4.2.1.70|EC:5.4.99.12	rna pseudourine synthase 2	IPR006145|IPR002942|IPR020103|IPR006224	Pseudouridine synthase, RsuA/RluB/C/D/E/F|RNA-binding S4 domain|Pseudouridine synthase, catalytic domain|Pseudouridine synthase, RluC/RluD, conserved site	GO:0001522|GO:0003723|GO:0009451|GO:0009982	NULL	NULL
Dr18775	GO:0009536	NULL	ankyrin repeat domain-containing protein	IPR020683|IPR002110	Ankyrin repeat-containing domain|Ankyrin repeat	GO:0005515	NULL	NULL
Dr18762	NULL	NULL	NULL	IPR001623|IPR012677|IPR018253	DnaJ domain|Nucleotide-binding, alpha-beta plait|DnaJ domain, conserved site	GO:0000166	NULL	NULL
Dr04978	GO:0003725|GO:0008026|GO:0005524|GO:0006096|GO:0004332|GO:0006000|GO:0006013|GO:0006020|GO:0006094|GO:0006098|GO:0015976	EC:4.1.2.13	probable atp-dependent rna helicase dhx36-like	IPR014720|IPR011545|IPR001650|IPR007502|IPR011709|IPR027417|IPR014001|IPR002464	Double-stranded RNA-binding domain|DNA/RNA helicase, DEAD/DEAH box type, N-terminal|Helicase, C-terminal|Helicase-associated domain|Domain of unknown function DUF1605|P-loop containing nucleoside triphosphate hydrolase|Helicase, superfamily 1/2, ATP-binding domain|DNA/RNA helicase, ATP-dependent, DEAH-box type, conserved site	GO:0003676|GO:0005524|GO:0008026|GO:0004386	NULL	NULL
Dr04993	GO:0016740	NULL	dna polymerase v	IPR007015	DNA polymerase V	GO:0003677|GO:0003887|GO:0006351	NULL	NULL
Dr05003	GO:0050662|GO:0000166|GO:0055114|GO:0045552|GO:0009813	EC:1.1.1.219	cinnamoyl- reductase	NULL	NULL	NULL	NULL	NULL
Dr04972	GO:0043631|GO:0003723|GO:0004652|GO:0005634|GO:0005739	EC:2.7.7.19	poly polymerase	IPR002934|IPR007010|IPR007012|IPR011068|IPR014492	Nucleotidyl transferase domain|Poly(A) polymerase, RNA-binding domain|Poly(A) polymerase, central domain|Nucleotidyltransferase, class I, C-terminal-like|Poly(A) polymerase	GO:0016779|GO:0003723|GO:0004652|GO:0005634|GO:0043631|GO:0031123	NULL	NULL
Dr04983	GO:0002161|GO:0003676|GO:0005739|GO:0004813|GO:0006419|GO:0004823|GO:0006450|GO:0005524|GO:0006429|GO:0009507|GO:0006522|GO:0006531|GO:0009097|GO:0009098|GO:0009099	EC:6.1.1.7|EC:6.1.1.4	leucyl-trna synthetase	IPR002302|IPR015413|IPR025709|IPR009008|IPR014729|IPR001412	Leucine-tRNA ligase, bacterial/mitochondrial|Methionyl/Leucyl tRNA synthetase|Leucyl-tRNA synthetase, editing domain|Valyl/Leucyl/Isoleucyl-tRNA synthetase, editing domain|Rossmann-like alpha/beta/alpha sandwich fold|Aminoacyl-tRNA synthetase, class I, conserved site	GO:0000166|GO:0004823|GO:0005524|GO:0006429|GO:0004812|GO:0006418|GO:0002161	EC:6.1.1.4	KEGG: 00970+6.1.1.4|Reactome: REACT_71
Dr04985	GO:0009624|GO:0006835|GO:0017153|GO:0015238|GO:0005886|GO:0006855|GO:0015297|GO:0006812	NULL	mate efflux family protein dtx1-like	IPR002528	Multi antimicrobial extrusion protein	GO:0006855|GO:0015238|GO:0015297|GO:0016020|GO:0055085	NULL	Reactome: REACT_15518|Reactome: REACT_20633
Dr04988	GO:0009941|GO:0016491|GO:0005507|GO:0009570|GO:0009579|GO:0005739|GO:0055114	NULL	fruit protein pkiwi502	IPR001433|IPR017938|IPR001221|IPR017927	Oxidoreductase FAD/NAD(P)-binding|Phenol hydroxylase reductase|Riboflavin synthase-like beta-barrel|Ferredoxin reductase-type FAD-binding domain	GO:0016491|GO:0055114	NULL	NULL
Dr04995	GO:0005739	NULL	uncharacterized protein	NULL	NULL	NULL	NULL	NULL
Dr05000	GO:0042538|GO:0009443|GO:0010054|GO:0016310|GO:0008478|GO:0042816	EC:2.7.1.35	pyridoxal kinase	IPR004625|IPR013749	Pyridoxal phosphate (active vitamin B6) biosynthesis, pyridoxal kinase|Phosphomethylpyrimidine kinase type-1	GO:0008478|GO:0009443	EC:2.7.1.35	KEGG: 00750+2.7.1.35|MetaCyc: PWY-7204
Dr05017	NULL	NULL	NULL	NULL	NULL	NULL	NULL	NULL
Dr05026	GO:0009958	NULL	altered response to gravity	NULL	NULL	NULL	NULL	NULL
Dr05051	GO:0016568	NULL	protein vernalization insensitive 3-like	NULL	NULL	NULL	NULL	NULL
Dr05054	GO:0004672|GO:0016491|GO:0016023|GO:0071944|GO:0016310|GO:0009507|GO:0016020	NULL	atp binding	NULL	NULL	NULL	NULL	NULL
Dr05065	NULL	NULL	NULL	NULL	NULL	NULL	NULL	NULL
Dr05071	GO:0033743|GO:0046872|GO:0006979|GO:0009570|GO:0022900	EC:1.8.4.12	methionine sulfoxide reductase type	NULL	NULL	NULL	NULL	NULL
Dr05073	GO:0009813|GO:0045430|GO:0009536	EC:5.5.1.6	chalcone isomerase-like protein	NULL	NULL	NULL	NULL	NULL
Dr05074	GO:0006468|GO:0004674|GO:0046872|GO:0005524|GO:0004721|GO:0000165|GO:0009069|GO:0006470	EC:2.7.11.0|EC:3.1.3.16	protein kinase and pp2c-like domain-containing protein	NULL	NULL	NULL	NULL	NULL
Dr05094	GO:0016558|GO:0004842|GO:0016567|GO:0006635	EC:6.3.2.19	ubiquitin-conjugating enzyme e2 16	NULL	NULL	NULL	NULL	NULL
Dr05049	GO:0009536|GO:0018849|GO:0018874|GO:0019261|GO:0042184|GO:0042203	EC:5.5.1.1	l-ala-d l-glu epimerase-like	NULL	NULL	NULL	NULL	NULL
Dr05052	GO:0009941|GO:0009058|GO:0016740	NULL	nucleotidyl transferase domain-containing protein	NULL	NULL	NULL	NULL	NULL
Dr05064	GO:0004615|GO:0005829|GO:0004610|GO:0009507|GO:0004614|GO:0006000|GO:0006013|GO:0006040|GO:0005982|GO:0005985|GO:0006012|GO:0006094|GO:0006096|GO:0006098|GO:0019872	EC:5.4.2.8|EC:5.4.2.3|EC:5.4.2.2	phosphoglucomutase phosphomannomutase family protein	NULL	NULL	NULL	NULL	NULL
Dr05069	GO:0009536|GO:0016020	NULL	protein	NULL	NULL	NULL	NULL	NULL
Dr05081	GO:0009536	NULL	uncharacterized protein	NULL	NULL	NULL	NULL	NULL
Dr05085	GO:0042538|GO:0006629|GO:0004252|GO:0005794|GO:0006508|GO:0005783	EC:3.4.21.0	membrane-bound transcription factor site-1 protease	NULL	NULL	NULL	NULL	NULL
Dr05111	GO:0072546|GO:0005773|GO:0016023|GO:0005886	NULL	uncharacterized protein kiaa0090 homolog	NULL	NULL	NULL	NULL	NULL
Dr05115	GO:0008026|GO:0003676|GO:0006139|GO:0000166	NULL	atp-dependent rna helicase ddx11-like protein 8-like	NULL	NULL	NULL	NULL	NULL
Dr05124	GO:0009536	NULL	tic22-like family protein	NULL	NULL	NULL	NULL	NULL
Dr05109	GO:0006979|GO:0006631|GO:0015994|GO:0009651|GO:0010189|GO:0009266|GO:0009976|GO:0009915|GO:0010287|GO:0031347|GO:0016122|GO:0009644	NULL	tocopherol cyclase	NULL	NULL	NULL	NULL	NULL
Dr05118	GO:0016779|GO:0003676|GO:0006259|GO:0009536|GO:0004386	EC:2.7.7.0	protein	NULL	NULL	NULL	NULL	NULL
Dr05126	GO:0003864|GO:0050897|GO:0015940|GO:0032259|GO:0008270|GO:0008168|GO:0005739	EC:2.1.2.11|EC:2.1.1.0	3-methyl-2-oxobutanoate hydroxymethyltransferase	NULL	NULL	NULL	NULL	NULL
Dr05134	NULL	NULL	NULL	NULL	NULL	NULL	NULL	NULL
Dr05190	GO:0009507	NULL	uncharacterized protein chloroplastic-like	NULL	NULL	NULL	NULL	NULL
Dr05137	NULL	NULL	NULL	NULL	NULL	NULL	NULL	NULL
Dr05170	NULL	NULL	NULL	NULL	NULL	NULL	NULL	NULL
Dr00024	GO:0009536	NULL	uncharacterized protein	IPR018962	Domain of unknown function DUF1995	NULL	NULL	NULL
Dr00004	GO:0008270|GO:0003676	NULL	putatative protein	IPR019339	CBF1-interacting co-repressor CIR, N-terminal domain	NULL	NULL	NULL
Dr00011	GO:0009987|GO:0005739|GO:0044446|GO:0009507	NULL	hydrolase-like protein	IPR012908	GPI inositol-deacylase PGAP1-like	GO:0006505|GO:0006886|GO:0016788	NULL	NULL
Dr00005	GO:0000272|GO:0016161|GO:0005982|GO:0005985	EC:3.2.1.2	beta-amylase	IPR001554|IPR008540|IPR017853|IPR013781	Glycoside hydrolase, family 14|BZR1, transcriptional repressor|Glycoside hydrolase, superfamily|Glycoside hydrolase, catalytic domain	GO:0000272|GO:0016161|GO:0003824|GO:0005975	EC:3.2.1.2	KEGG: 00500+3.2.1.2|MetaCyc: PWY-6724|MetaCyc: PWY-842
Dr00075	GO:0009536	NULL	uncharacterized protein	IPR005031|IPR023393	Streptomyces cyclase/dehydrase|START-like domain	NULL	NULL	NULL
Dr00056	GO:0005739	NULL	at1g07590-like protein	IPR002885	Pentatricopeptide repeat	NULL	NULL	NULL
Dr00062	GO:0010287|GO:0009579|GO:0016853|GO:0000166|GO:0006979	NULL	uncharacterized protein chloroplastic-like	IPR016040	NAD(P)-binding domain	NULL	NULL	NULL
Dr00078	GO:0005739	NULL	uncharacterized protein	IPR006927	Protein of unknown function DUF639	NULL	NULL	NULL
Dr00082	GO:0051536|GO:0003887|GO:0006303|GO:0001882|GO:0003896|GO:0006297|GO:0003677|GO:0008408|GO:0006269|GO:0006270|GO:0000166|GO:0019985|GO:0005658|GO:0006273|GO:0042575|GO:0005730|GO:0006351	EC:2.7.7.7	dna polymerase alpha catalytic	IPR006134|IPR006133|IPR015088|IPR024647|IPR012337|IPR023211|IPR006172|IPR004578|IPR017964	DNA-directed DNA polymerase, family B, multifunctional domain|DNA-directed DNA polymerase, family B, exonuclease domain|Zinc finger, DNA-directed DNA polymerase, family B, alpha|DNA polymerase alpha catalytic subunit, N-terminal domain|DNA-directed DNA polymerase, family B|Ribonuclease H-like domain|DNA polymerase, palm domain|DNA-directed DNA polymerase, family B, pol2|DNA-directed DNA polymeras…	GO:0000166|GO:0003677|GO:0003887|GO:0006260|GO:0001882|GO:0003676|GO:0006139	EC:2.7.7.7	KEGG: 00230+2.7.7.7|KEGG: 00240+2.7.7.7
Dr00113	NULL	NULL	NULL	IPR003746	Protein of unknown function DUF167	NULL	NULL	NULL
Dr00122	GO:0034432|GO:0005524|GO:0009507|GO:0004081|GO:0006144|GO:0006206	EC:3.6.1.17	diadenosine 5 - -tetraphosphate hydrolase	IPR000086|IPR015797|IPR020476|IPR020084|IPR022927	NUDIX hydrolase domain|NUDIX hydrolase|NUDIX hydrolase domain-like|NUDIX hydrolase, conserved site|RNA pyrophosphohydrolase RppH	GO:0016787	EC:3.6.1.-	KEGG: 00230+3.6.1.-|KEGG: 00790+3.6.1.-
Dr00128	GO:0016023	NULL	amidohydrolase family protein	IPR013108|IPR011059	Amidohydrolase 3|Metal-dependent hydrolase, composite domain	GO:0016810	NULL	NULL
Dr00135	GO:0004553|GO:0005975	EC:3.2.1.0	beta-galactosidase	IPR006102|IPR006103|IPR006104|IPR004199|IPR008979|IPR017853|IPR011013|IPR013812|IPR014718|IPR013781|IPR006101|IPR023232|IPR023230	Glycoside hydrolase, family 2, immunoglobulin-like beta-sandwich|Glycoside hydrolase, family 2, TIM barrel|Glycosyl hydrolases family 2, sugar binding domain|Beta galactosidase small chain/ domain 5|Glycoside hydrolase, family 2|Galactose-binding domain-like|Glycoside hydrolase, superfamily|Galactose mutarotase-like domain|Glycoside hydrolase, family 2/20, immunoglobulin-like beta-sandwich domain…	GO:0004553|GO:0005975|GO:0004565|GO:0009341|GO:0003824|GO:0030246	EC:3.2.1.23	KEGG: 00052+3.2.1.23|KEGG: 00511+3.2.1.23|KEGG: 00531+3.2.1.23|KEGG: 00600+3.2.1.23|KEGG: 00604+3.2.1.23|MetaCyc: PWY-6791|MetaCyc: PWY-6807
Dr00150	GO:0005525|GO:0005509|GO:0006184|GO:0005741|GO:0007264|GO:0019725|GO:0009790|GO:0007005|GO:0009737|GO:0003924|GO:0009860	NULL	protein	IPR013566|IPR013567|IPR013684|IPR027417|IPR011992|IPR001806|IPR020849|IPR003578|IPR003579|IPR021181|IPR002048|IPR020860|IPR018247	EF hand associated, type-1|EF hand associated, type-2|Mitochondrial Rho-like|Small GTPase superfamily|P-loop containing nucleoside triphosphate hydrolase|EF-hand domain pair|Small GTPase superfamily, Ras type|Small GTPase superfamily, Rho type|Small GTPase superfamily, Rab type|Small GTPase superfamily, mitochondrial Rho|EF-hand domain|MIRO|EF-Hand 1, calcium-binding site	GO:0005525|GO:0005622|GO:0007264|GO:0005509|GO:0003924|GO:0006184|GO:0007165|GO:0016020|GO:0015031|GO:0005741|GO:0019725	NULL	Reactome: REACT_11044
Dr00160	NULL	NULL	NULL	IPR012978|IPR016024	Uncharacterised domain NUC173|Armadillo-type fold	GO:0005488	NULL	NULL
Dr18925	GO:0005643|GO:0051170|GO:0005654|GO:0008565|GO:0006886|GO:0009536	NULL	transportin 1	IPR000357|IPR001494|IPR001357|IPR016024|IPR011989	HEAT|Importin-beta, N-terminal domain|BRCT domain|Armadillo-type fold|Armadillo-like helical	GO:0005515|GO:0006886|GO:0008536|GO:0005488	NULL	NULL
Dr18901	GO:0009987|GO:0005739|GO:0046872|GO:0009737	NULL	abi3-interacting protein 2-1 protein	IPR001841|IPR013083	Zinc finger, RING-type|Zinc finger, RING/FYVE/PHD-type	GO:0005515|GO:0008270	NULL	NULL
Dr18906	GO:0009553	NULL	ccaat enhancer-binding protein zeta-like	IPR005612|IPR016024|IPR011989	CCAAT-binding factor|Armadillo-type fold|Armadillo-like helical	GO:0005488	NULL	NULL
Dr18926	GO:0008026|GO:0003676|GO:0005524|GO:0006310	NULL	atp-dependent dna helicase q-like 3	IPR011545|IPR001650|IPR027417|IPR011991|IPR014001|IPR004589	DNA/RNA helicase, DEAD/DEAH box type, N-terminal|Helicase, C-terminal|P-loop containing nucleoside triphosphate hydrolase|Winged helix-turn-helix DNA-binding domain|Helicase, superfamily 1/2, ATP-binding domain|DNA helicase, ATP-dependent, RecQ type	GO:0003676|GO:0005524|GO:0008026|GO:0004386|GO:0006310	NULL	NULL
Dr18927	GO:1901700|GO:0004029|GO:0006950|GO:0006081|GO:0009628|GO:0006094|GO:0006096|GO:0006525|GO:0006547|GO:0006550|GO:0006552|GO:0006554|GO:0006560|GO:0006568|GO:0006574|GO:0006631|GO:0006699|GO:0019260|GO:0019482|GO:0019852|GO:0046251|GO:0046486	EC:1.2.1.3	aldehyde dehydrogenase family 7 member a1	IPR015590|IPR016161|IPR016163|IPR016162|IPR016160	Aldehyde dehydrogenase domain|Aldehyde/histidinol dehydrogenase|Aldehyde dehydrogenase, C-terminal|Aldehyde dehydrogenase, N-terminal|Aldehyde dehydrogenase, conserved site	GO:0008152|GO:0016491|GO:0055114|GO:0016620	NULL	NULL
Dr18933	GO:0010193|GO:0055114|GO:0005777|GO:0009620|GO:0009611|GO:0009695|GO:0016629|GO:0010181|GO:0031408	EC:1.3.1.42	12-oxophytodienoate reductase 3	IPR001155|IPR013785	NADH:flavin oxidoreductase/NADH oxidase, N-terminal|Aldolase-type TIM barrel	GO:0010181|GO:0016491|GO:0055114|GO:0003824	NULL	NULL
Dr18939	GO:0006357|GO:0001104|GO:0016592	NULL	tata-binding related factor of subunit 20 of mediator complex	IPR013921	Mediator complex, subunit Med20	GO:0001104|GO:0006357|GO:0016592	NULL	NULL
Dr18940	GO:0009536	NULL	protein	IPR001623	DnaJ domain	NULL	NULL	NULL
Dr18948	GO:0005773|GO:0008374|GO:0046027|GO:0005783|GO:0006629|GO:0042967	EC:2.3.1.158	phospholipid:diacylglycerol acyltransferase 1-like	IPR003386	Lecithin:cholesterol/phospholipid:diacylglycerol acyltransferase	GO:0006629|GO:0008374	NULL	NULL
Dr19013	GO:0046686|GO:0055114|GO:0047641|GO:0009536	EC:1.1.1.200	nadp-dependent d-sorbitol-6-phosphate dehydrogenase	IPR001395|IPR023210|IPR020471|IPR018170	Aldo/keto reductase|NADP-dependent oxidoreductase domain|Aldo/keto reductase subgroup|Aldo/keto reductase, conserved site	GO:0016491|GO:0055114	NULL	NULL
Dr19031	NULL	NULL	NULL	IPR009769	Domain of unknown function DUF1336	NULL	NULL	NULL
Dr19006	NULL	NULL	NULL	NULL	NULL	NULL	NULL	NULL
Dr19008	GO:0005634|GO:0006281	NULL	rad1-like protein	IPR003021	Rad1/Rec1/Rad17	GO:0005634|GO:0006281	NULL	NULL
Dr19057	GO:0016740	NULL	methyltransferase nsun6-like	IPR001678|IPR002478|IPR015947|IPR023267|IPR018314	Bacterial Fmu (Sun)/eukaryotic nucleolar NOL1/Nop2p|Pseudouridine synthase/archaeosine transglycosylase|RNA (C5-cytosine) methyltransferase|PUA-like domain|Bacterial Fmu (Sun)/eukaryotic nucleolar NOL1/Nop2p, conserved site	GO:0003723|GO:0008168	NULL	NULL
Dr19054	GO:0016020|GO:0016023	NULL	protein	IPR004877|IPR017214|IPR005018|IPR006593	Cytochrome b561, eukaryote|Uncharacterised conserved protein UCP037471|DOMON domain|Cytochrome b561/ferric reductase transmembrane	GO:0016021	NULL	NULL
Dr19067	NULL	NULL	NULL	IPR001680|IPR017986|IPR015943	WD40 repeat|WD40-repeat-containing domain|WD40/YVTN repeat-like-containing domain	GO:0005515	NULL	NULL
Dr19070	GO:0005739	NULL	pentatricopeptide repeat-containing protein	IPR002885|IPR011990	Pentatricopeptide repeat|Tetratricopeptide-like helical	GO:0005515	NULL	NULL
Dr19071	GO:0046872|GO:0016992|GO:0051539|GO:0009507|GO:0009107	EC:2.8.1.8	protein	IPR003698|IPR007197|IPR013785|IPR006638|IPR027526	Lipoyl synthase|Radical SAM|Aldolase-type TIM barrel|Elongator protein 3/MiaB/NifB|Lipoyl synthase, chloroplastic	GO:0009107|GO:0016992|GO:0051539|GO:0003824|GO:0051536|GO:0009507	EC:2.8.1.8	KEGG: 00785+2.8.1.8|MetaCyc: PWY-6987|UniPathway: UPA00538
Dr19105	NULL	NULL	NULL	IPR022042	snRNA-activating protein complex, subunit 3	NULL	NULL	NULL
Dr19081	GO:0006468|GO:0005524|GO:0004674|GO:0009069	EC:2.7.11.0	rio kinase 2	IPR018934|IPR015285|IPR011009|IPR011991|IPR000687	RIO-like kinase|RIO2 kinase, winged helix, N-terminal|Protein kinase-like domain|Winged helix-turn-helix DNA-binding domain|RIO kinase	GO:0003824|GO:0005524|GO:0004674|GO:0006468|GO:0016772	NULL	NULL
Dr19088	GO:0008270|GO:0003676	NULL	protein far1-related sequence 11-like	IPR007527|IPR018289|IPR006564	Zinc finger, SWIM-type|MULE transposase domain|Zinc finger, PMZ-type	GO:0008270	NULL	NULL
Dr19095	GO:0005739|GO:0050897|GO:0009507	NULL	cobalt ion binding protein	NULL	NULL	NULL	NULL	NULL
Dr19106	GO:0016491|GO:0016853|GO:0016209|GO:0055114|GO:0009507	NULL	peroxiredoxin	IPR000866|IPR012336	Alkyl hydroperoxide reductase subunit C/ Thiol specific antioxidant|Thioredoxin-like fold	GO:0016209|GO:0016491|GO:0055114	EC:1.11.1.15	KEGG: 00480+1.11.1.15
Dr19085	NULL	NULL	NULL	IPR028158|IPR028155|IPR028159	RPA-interacting protein, N-terminal domain|RPA-interacting protein, central domain|RPA-interacting protein, C-terminal domain	NULL	NULL	NULL
Dr19087	GO:0005773|GO:0009630	NULL	shoot gravitropism 2	IPR004177	DDHD	GO:0046872	NULL	NULL
Dr05213	NULL	NULL	NULL	NULL	NULL	NULL	NULL	NULL
Dr05278	GO:0016023	NULL	integral membrane protein	NULL	NULL	NULL	NULL	NULL
Dr05288	NULL	NULL	NULL	NULL	NULL	NULL	NULL	NULL
Dr05310	GO:0009536	NULL	tetratricopeptide repeat-containing protein	NULL	NULL	NULL	NULL	NULL
Dr05270	GO:0005730|GO:0006184|GO:0042254|GO:0003924|GO:0005525	NULL	nucleolar gtp-binding protein 2-like	NULL	NULL	NULL	NULL	NULL
Dr05281	GO:0070008|GO:0005739|GO:0006508|GO:0004252	EC:3.4.21.0|EC:3.4.21.0	oligopeptidase b	NULL	NULL	NULL	NULL	NULL
Dr05286	GO:0055114|GO:0004158|GO:0005739|GO:0006222|GO:0006207|GO:0016020	EC:1.3.3.1	dihydroorotate dehydrogenase	NULL	NULL	NULL	NULL	NULL
Dr05346	GO:0009571|GO:0010207|GO:0009570	NULL	low psii accumulation 3 protein	NULL	NULL	NULL	NULL	NULL
Dr05301	GO:0016020	NULL	probable s-acyltransferase at3g18620-like	NULL	NULL	NULL	NULL	NULL
Dr05306	GO:0016023	NULL	binding protein	NULL	NULL	NULL	NULL	NULL
Dr05313	GO:0009507	NULL	protein	NULL	NULL	NULL	NULL	NULL
Dr05315	GO:0003676|GO:0008026|GO:0009553|GO:0005524	NULL	dead-box atp-dependent rna helicase 36-like	NULL	NULL	NULL	NULL	NULL
Dr05316	GO:0046872|GO:0004222|GO:0046686|GO:0009570|GO:0006508|GO:0005829|GO:0048046	EC:3.4.24.0	oligopeptidase a	NULL	NULL	NULL	NULL	NULL
Dr05324	NULL	NULL	NULL	NULL	NULL	NULL	NULL	NULL
Dr05404	GO:0009536	NULL	phosphoglycerate mutase-like protein	NULL	NULL	NULL	NULL	NULL
Dr05363	GO:0009536	NULL	multiple chloroplast division site 1	NULL	NULL	NULL	NULL	NULL
Dr05365	GO:0016020	NULL	mitochondrial phosphate carrier protein	NULL	NULL	NULL	NULL	NULL
Dr05373	NULL	NULL	NULL	NULL	NULL	NULL	NULL	NULL
Dr05393	GO:0016023|GO:0005794|GO:0005739|GO:0009536|GO:0016757|GO:0005886	NULL	galacturonosyltransferase 3	NULL	NULL	NULL	NULL	NULL
Dr05407	GO:0006259|GO:0009536|GO:0003677|GO:0000166	NULL	2 family protein	NULL	NULL	NULL	NULL	NULL
Dr05337	NULL	NULL	NULL	NULL	NULL	NULL	NULL	NULL
Dr19119	GO:0022891|GO:0055085|GO:0008643|GO:0032440|GO:0016021|GO:0009536|GO:0055114	EC:1.3.1.74	probable plastidic glucose transporter 1-like	IPR005828|IPR016196|IPR003663|IPR020846|IPR005829	General substrate transporter|Sugar/inositol transporter|Major facilitator superfamily domain, general substrate transporter|Major facilitator superfamily domain|Sugar transporter, conserved site	GO:0016021|GO:0022857|GO:0055085|GO:0016020|GO:0022891|GO:0005215|GO:0006810	NULL	Reactome: REACT_15518
Dr19129	GO:0003824|GO:0008152	NULL	cwf19-like protein 2-like	IPR006767|IPR006768|IPR011146	Cwf19-like protein, C-terminal domain-2|Cwf19-like, C-terminal domain-1|HIT-like domain	GO:0003824	NULL	NULL
Dr19205	GO:0000910|GO:0051082|GO:0007021|GO:0005874	NULL	tubulin-specific chaperone a	IPR004226	Tubulin binding cofactor A	GO:0005874|GO:0007021|GO:0051082	NULL	NULL
Dr19210	GO:0016020|GO:0005739	NULL	protein	IPR026749|IPR003397	Transmembrane protein 135|Mitochondrial inner membrane translocase subunit Tim17/Tim22/Tim23/peroxisomal protein PMP24	NULL	NULL	NULL
Dr19161	NULL	NULL	NULL	NULL	NULL	NULL	NULL	NULL
Dr19162	GO:0004001|GO:0005739|GO:0004747|GO:0006167|GO:0006014|GO:0016310|GO:0015979|GO:0009507|GO:0006144|GO:0006098	EC:2.7.1.20|EC:2.7.1.15	carbohydrate kinase-like protein	IPR011611|IPR002139|IPR002173	Carbohydrate kinase PfkB|Ribokinase|Carbohydrate/puine kinase, PfkB, conserved site	GO:0004747|GO:0006014|GO:0016773	NULL	NULL
Dr19168	NULL	NULL	NULL	NULL	NULL	NULL	NULL	NULL
Dr19172	GO:0042802|GO:0003727|GO:0004540|GO:0004536|GO:0005634|GO:0003690|GO:0051252	NULL	exosome complex component rrp46	IPR001247|IPR020568|IPR015847|IPR027408	Exoribonuclease, phosphorolytic domain 1|Ribosomal protein S5 domain 2-type fold|Exoribonuclease, phosphorolytic domain 2|PNPase/RNase PH domain	NULL	NULL	Reactome: REACT_21257
Dr19156	GO:0008152|GO:0008777|GO:0000051	EC:3.5.1.16	acetylornithine deacetylase	IPR002933|IPR011650	Peptidase M20|Peptidase M20, dimerisation domain	GO:0008152|GO:0016787	NULL	NULL
Dr19178	NULL	NULL	NULL	IPR021013	ATPase, vacuolar ER assembly factor, Vma12	NULL	NULL	NULL
Dr19324	GO:0008152|GO:0005739|GO:0000166|GO:0048037|GO:0016616|GO:0009536	EC:1.1.1.0	d-3-phosphoglycerate dehydrogenase	IPR006139|IPR006140|IPR016040	D-isomer specific 2-hydroxyacid dehydrogenase, catalytic domain|D-isomer specific 2-hydroxyacid dehydrogenase, NAD-binding|NAD(P)-binding domain	GO:0008152|GO:0016616|GO:0051287|GO:0055114|GO:0048037	NULL	NULL
Dr19315	NULL	NULL	NULL	IPR006703|IPR027417	AIG1|P-loop containing nucleoside triphosphate hydrolase	GO:0005525	NULL	NULL
Dr19386	GO:0044260|GO:0044699|GO:0032259|GO:0016740|GO:0065007|GO:0006139|GO:0010467	NULL	polycomb protein ez1	IPR001214|IPR025778|IPR026489	SET domain|Histone-lysine N-methyltransferase, EZ|CXC domain	GO:0005515|GO:0031519	EC:2.1.1.43	KEGG: 00310+2.1.1.43
Dr05466	GO:0004725|GO:0009570|GO:0035335|GO:0006570	EC:3.1.3.48	low molecular weight protein-tyrosine-phosphatase slr0328	NULL	NULL	NULL	NULL	NULL
Dr05424	GO:0009958|GO:0048364|GO:0030904|GO:0005771|GO:0006623|GO:0035091|GO:0006896|GO:0010252|GO:0007154	NULL	sorting nexin 1	NULL	NULL	NULL	NULL	NULL
Dr05426	GO:0009535|GO:0005739|GO:0009570	NULL	uncharacterized protein	NULL	NULL	NULL	NULL	NULL
Dr05427	GO:0016787|GO:0005524|GO:0005739	NULL	abhydrolase domain-containing protein 11-like	NULL	NULL	NULL	NULL	NULL
Dr05481	GO:0016491|GO:0000166|GO:0055114|GO:0050897|GO:0008270	NULL	alcohol dehydrogenase-like protein	NULL	NULL	NULL	NULL	NULL
Dr05437	GO:0033388|GO:0050126|GO:0006560	EC:3.5.1.53	n-carbamoylputrescine amidase	NULL	NULL	NULL	NULL	NULL
Dr19390	NULL	NULL	NULL	IPR002885|IPR011990	Pentatricopeptide repeat|Tetratricopeptide-like helical	GO:0005515	NULL	NULL
Dr19398	NULL	NULL	NULL	IPR001810|IPR006652|IPR015916	F-box domain|Kelch repeat type 1|Galactose oxidase, beta-propeller	GO:0005515	NULL	NULL
Dr19431	GO:0008242|GO:0006508|GO:0005634|GO:0008234|GO:0006355	EC:3.4.19.0	ataxin-3 homolog	IPR006155|IPR003388	Machado-Joseph disease protein MJD|Reticulon	GO:0008242	NULL	NULL
Dr19433	GO:0004386|GO:1901363|GO:0097159	NULL	helicase ski2w	IPR011545|IPR012961|IPR025696|IPR027417|IPR014001|IPR001650|IPR016438	DNA/RNA helicase, DEAD/DEAH box type, N-terminal|DSH, C-terminal|rRNA-processing arch domain|P-loop containing nucleoside triphosphate hydrolase|Helicase, superfamily 1/2, ATP-binding domain|Helicase, C-terminal|RNA helicase, ATP-dependent, SK12/DOB1	GO:0003676|GO:0005524|GO:0008026|GO:0016818|GO:0004386|GO:0016817	NULL	NULL
Dr19435	GO:0055085|GO:0006468|GO:0004674|GO:0016021|GO:0005315|GO:0009536|GO:0005524|GO:0009555|GO:0009069|GO:0006817	EC:2.7.11.0	probable leucine-rich repeat receptor-like protein kinase at4g00330-like	IPR001245|IPR011009|IPR013320|IPR002290|IPR000719|IPR017441|IPR008271	Serine-threonine/tyrosine-protein kinase catalytic domain|Protein kinase-like domain|Concanavalin A-like lectin/glucanase, subgroup|Serine/threonine- / dual specificity protein kinase, catalytic domain|Protein kinase domain|Protein kinase, ATP binding site|Serine/threonine-protein kinase, active site	GO:0004672|GO:0006468|GO:0016772|GO:0005524|GO:0004674	NULL	NULL
Dr19438	GO:0050278|GO:0005986|GO:0019253|GO:0042742|GO:0046872|GO:0042132|GO:0009941|GO:0009579|GO:0019252|GO:0009570|GO:0048046|GO:0015976|GO:0006000|GO:0006013|GO:0006094|GO:0006096|GO:0006098	EC:3.1.3.37|EC:3.1.3.11	protein	IPR000146|IPR023079|IPR020548	Fructose-1,6-bisphosphatase class 1/Sedoheputulose-1,7-bisphosphatase|Sedoheptulose-1,7-bisphosphatase|Fructose-1,6-bisphosphatase, active site	GO:0005975|GO:0042132|GO:0042578	EC:3.1.3.11	KEGG: 00010+3.1.3.11|KEGG: 00030+3.1.3.11|KEGG: 00051+3.1.3.11|KEGG: 00680+3.1.3.11|KEGG: 00710+3.1.3.11|MetaCyc: PWY-5484|Reactome: REACT_474|UniPathway: UPA00138|KEGG: 00010+3.1.3.11|KEGG: 00030+3.1.3.11|KEGG: 00051+3.1.3.11|KEGG: 00680+3.1.3.11|KEGG: 00710+3.1.3.11|MetaCyc: PWY-5484|UniPathway: UPA00138|KEGG: 00010+3.1.3.11|KEGG: 00030+3.1.3.11|KEGG: 00051+3.1.3.11|KEGG: 00680+3.1.3.11|KEGG: 0…
Dr19455	GO:0055085|GO:0010117|GO:0016021|GO:0005743|GO:0009941|GO:0042651|GO:0015867|GO:0010206|GO:0005347|GO:0009624	NULL	probable envelope carrier chloroplastic-like	IPR018108|IPR023395|IPR002067	Mitochondrial substrate/solute carrier|Mitochondrial carrier protein|Mitochondrial carrier domain	GO:0055085	NULL	NULL
Dr19418	NULL	NULL	NULL	IPR018616	Guanylyl cyclase	NULL	NULL	NULL
Dr19424	GO:0009295|GO:0032968	NULL	plastid transcriptionally active 13	IPR006645|IPR008991|IPR014722	Transcription antitermination protein NusG, N-terminal domain|Translation protein SH3-like domain|Ribosomal protein L2 domain 2	GO:0006355	NULL	NULL
Dr19492	GO:0008152|GO:0008168|GO:0009536	EC:2.1.1.0	trna (guanine-n -)-methyltransferase-like	IPR003402|IPR025792	tRNA transferase Trm5/Tyw2|tRNA (guanine(37)-N(1))-methyltransferase, eukaryotic	GO:0016740|GO:0009019|GO:0030488	NULL	NULL
Dr19502	GO:0009725|GO:0003677|GO:0003682|GO:0006950|GO:1901700|GO:0000785	NULL	myb-related protein m4	IPR001005|IPR009057|IPR017930	SANT/Myb domain|Homeodomain-like|Myb domain	GO:0003682|GO:0003677	NULL	NULL
Dr19520	NULL	NULL	NULL	IPR001164	Arf GTPase activating protein	GO:0008060|GO:0008270|GO:0032312	NULL	NULL
Dr19490	GO:0008270	NULL	nitric oxide synthase-interacting protein	IPR027799|IPR013083|IPR016818|IPR001841	Replication termination factor 2, RING-finger|Zinc finger, RING/FYVE/PHD-type|Nitric oxide synthase-interacting|Zinc finger, RING-type	GO:0005515|GO:0008270	NULL	NULL
Dr19496	GO:0055114|GO:0051536|GO:0016679|GO:0009628|GO:0042651|GO:0044237|GO:0044434	NULL	rieske iron-sulphur protein precursor	IPR014349|IPR017941|IPR014909|IPR005805|IPR023960	Rieske iron-sulphur protein|Rieske [2Fe-2S] iron-sulphur domain|Cytochrome b6-f complex Fe-S subunit|Rieske iron-sulphur protein, C-terminal|Cytochrome b6-f complex iron-sulfur subunit	GO:0016679|GO:0055114|GO:0016491|GO:0051537|GO:0009496|GO:0042651|GO:0008121|GO:0016020|GO:0015979|GO:0045158	EC:1.10.9.1	KEGG: 00195+1.10.9.1|MetaCyc: PWY-101|MetaCyc: PWY-6785
Dr19534	GO:0009536	NULL	proline synthetase associated	IPR011078|IPR001608	Uncharacterised protein family UPF0001|Alanine racemase, N-terminal	NULL	EC:5.1.1.1	KEGG: 00473+5.1.1.1|UniPathway: UPA00042
Dr19535	GO:0010090|GO:0000015|GO:0000287|GO:0006096|GO:0009507|GO:0004634|GO:0000162|GO:0006094|GO:0006571|GO:0009094	EC:4.2.1.11	enolase chloroplastic-like	IPR000941|IPR020810|IPR020811|IPR020809	Enolase|Enolase, C-terminal|Enolase, N-terminal|Enolase, conserved site	GO:0000015|GO:0000287|GO:0004634|GO:0006096	EC:4.2.1.11	KEGG: 00010+4.2.1.11|KEGG: 00680+4.2.1.11|MetaCyc: PWY-1042|MetaCyc: PWY-1622|MetaCyc: PWY-2221|MetaCyc: PWY-5484|MetaCyc: PWY-5723|MetaCyc: PWY-6142|MetaCyc: PWY-6886|MetaCyc: PWY-6901|MetaCyc: PWY-7003|MetaCyc: PWY-7124|MetaCyc: PWY-7218|Reactome: REACT_474|UniPathway: UPA00109|KEGG: 00010+4.2.1.11|KEGG: 00680+4.2.1.11|MetaCyc: PWY-1042|MetaCyc: PWY-1622|MetaCyc: PWY-2221|MetaCyc: PWY-5484|Meta…
Dr05536	NULL	NULL	NULL	NULL	NULL	NULL	NULL	NULL
Dr05578	NULL	NULL	NULL	NULL	NULL	NULL	NULL	NULL
Dr05579	NULL	NULL	NULL	NULL	NULL	NULL	NULL	NULL
Dr05583	GO:0016021	NULL	protein	NULL	NULL	NULL	NULL	NULL
Dr05555	GO:0005975|GO:0044237|GO:0044464|GO:0044710|GO:0016758	EC:2.4.1.0	sterol 3-beta-glucosyltransferase	NULL	NULL	NULL	NULL	NULL
Dr05564	GO:0016023|GO:0016310|GO:0004672|GO:0016020|GO:0000166	NULL	probable receptor-like protein kinase at1g49730-like	NULL	NULL	NULL	NULL	NULL
Dr05609	GO:0016787|GO:0009507	NULL	alpha beta-hydrolase domain-containing protein	NULL	NULL	NULL	NULL	NULL
Dr05629	GO:0015996|GO:0010304|GO:0009536	NULL	uncharacterized protein	NULL	NULL	NULL	NULL	NULL
Dr05643	GO:0050660|GO:0009941|GO:0015036|GO:0005778|GO:0045454|GO:0016656|GO:0022900|GO:0006118|GO:0019852	EC:1.6.5.4	monodehydroascorbate reductase	NULL	NULL	NULL	NULL	NULL
Dr05644	GO:0017111|GO:0006952|GO:0043531|GO:0005524	EC:3.6.1.15	uncharacterized protein	NULL	NULL	NULL	NULL	NULL
Dr05665	GO:0010087|GO:0032875|GO:0031145|GO:0030071|GO:0005680	NULL	anaphase-promoting complex subunit 10	NULL	NULL	NULL	NULL	NULL
Dr05681	GO:0005525|GO:0003723|GO:0009507|GO:0007264	NULL	gtpase era-like	NULL	NULL	NULL	NULL	NULL
Dr05690	GO:0009543|GO:0008236|GO:0006508	NULL	carboxyl-terminal-processing protease	NULL	NULL	NULL	NULL	NULL
Dr05692	GO:0016757|GO:0009058|GO:0006073|GO:0009536	NULL	soluble starch synthase iv-2	NULL	NULL	NULL	NULL	NULL
Dr05702	GO:0004721|GO:0006470	EC:3.1.3.16	protein phosphatase 2c 8	NULL	NULL	NULL	NULL	NULL
Dr05562	NULL	NULL	NULL	NULL	NULL	NULL	NULL	NULL
Dr05576	NULL	NULL	NULL	NULL	NULL	NULL	NULL	NULL
Dr05582	NULL	NULL	NULL	NULL	NULL	NULL	NULL	NULL
Dr05599	GO:0009987|GO:0003723|GO:0044699|GO:0030529|GO:0044434	NULL	50s ribosomal protein chloroplast	NULL	NULL	NULL	NULL	NULL
Dr05600	NULL	NULL	NULL	NULL	NULL	NULL	NULL	NULL
Dr05668	GO:0009396|GO:0004488|GO:0004477|GO:0055114|GO:0000166|GO:0046487	EC:1.5.1.5|EC:3.5.4.9	amino acid dehydrogenase-like protein	NULL	NULL	NULL	NULL	NULL
Dr05708	GO:0003676|GO:0030529	NULL	u11 u12 small nuclear ribonucleoprotein 25 kda protein	NULL	NULL	NULL	NULL	NULL
Dr19664	GO:0003746|GO:0043043|GO:0005739|GO:0005840|GO:0006448	NULL	elongation factor p	IPR001059|IPR013185|IPR008991|IPR012340|IPR014722	Translation elongation factor P/YeiP, central|Translation elongation factor, KOW-like|Translation protein SH3-like domain|Nucleic acid-binding, OB-fold|Ribosomal protein L2 domain 2	GO:0003746|GO:0006414	NULL	UniPathway: UPA00345
Dr19668	NULL	NULL	NULL	IPR009297	Protein of unknown function DUF952	NULL	NULL	NULL
Dr19683	NULL	NULL	NULL	IPR000048|IPR025064	IQ motif, EF-hand binding site|Domain of unknown function DUF4005	GO:0005515	NULL	NULL
Dr19691	GO:0044464	NULL	protein odr-4 homolog	NULL	NULL	NULL	NULL	NULL
Dr19713	NULL	NULL	NULL	IPR012466|IPR011993	Adaptin ear-binding coat-associated protein 1 NECAP-1|Pleckstrin homology-like domain	GO:0006897|GO:0016020	NULL	NULL
Dr19803	GO:0000210|GO:0005622|GO:0008270|GO:0006769|GO:0046497	EC:3.6.1.22	nudix hydrolase chloroplastic-like	IPR000086|IPR015375|IPR015376|IPR015797|IPR020476|IPR020084	NUDIX hydrolase domain|NADH pyrophosphatase-like, N-terminal|Zinc ribbon, NADH pyrophosphatase|NUDIX hydrolase|NUDIX hydrolase domain-like|NUDIX hydrolase, conserved site	GO:0016787|GO:0046872	EC:3.6.1.22|EC:3.6.1.-	KEGG: 00760+3.6.1.22|MetaCyc: PWY-5381|KEGG: 00230+3.6.1.-|KEGG: 00790+3.6.1.-
Dr19810	GO:0005739	NULL	binding protein	IPR006597|IPR011990	Sel1-like|Tetratricopeptide-like helical	GO:0005515	NULL	NULL
Dr19775	GO:0051287|GO:0016651|GO:0055114|GO:0009536|GO:0048038	NULL	protein	NULL	NULL	NULL	NULL	NULL
Dr19800	GO:0042802|GO:0006260|GO:0003677|GO:0005524|GO:0000808|GO:0005634|GO:0009536	NULL	origin recognition complex subunit 4	IPR027417|IPR016527	P-loop containing nucleoside triphosphate hydrolase|Origin recognition complex, subunit 4	GO:0000808|GO:0003677|GO:0005634|GO:0006260	NULL	NULL
Dr19814	GO:0005739	NULL	pentatricopeptide repeat-containing protein	IPR002885|IPR011990	Pentatricopeptide repeat|Tetratricopeptide-like helical	GO:0005515	NULL	NULL
Dr19828	NULL	NULL	NULL	IPR002885|IPR011990	Pentatricopeptide repeat|Tetratricopeptide-like helical	GO:0005515	NULL	NULL
Dr19847	NULL	NULL	NULL	NULL	NULL	NULL	NULL	NULL
Dr19850	GO:0005975|GO:0016757|GO:0016023|GO:0016787	NULL	xyloglucan endotransglucosylase hydrolase protein 9	IPR000757|IPR010713|IPR008985|IPR013320	Glycoside hydrolase, family 16|Xyloglucan endo-transglycosylase, C-terminal|Concanavalin A-like lectin/glucanases superfamily|Concanavalin A-like lectin/glucanase, subgroup	GO:0004553|GO:0005975|GO:0005618|GO:0006073|GO:0016762|GO:0048046	NULL	NULL
Dr19854	GO:0016020|GO:0006810|GO:0005215	NULL	organic cation transporter isoform 1	IPR005828|IPR016196|IPR020846|IPR005829	General substrate transporter|Major facilitator superfamily domain, general substrate transporter|Major facilitator superfamily domain|Sugar transporter, conserved site	GO:0016021|GO:0022857|GO:0055085|GO:0005215|GO:0006810|GO:0016020	NULL	NULL
Dr05747	GO:0005488	NULL	protein	NULL	NULL	NULL	NULL	NULL
Dr05750	GO:0016021|GO:0009536|GO:0055085	NULL	sodium:hydrogen antiporter 1	NULL	NULL	NULL	NULL	NULL
Dr05773	GO:0016787|GO:0008270|GO:0008152	NULL	trna-specific adenosine deaminase	NULL	NULL	NULL	NULL	NULL
Dr05757	GO:0005507|GO:0005739|GO:0048038|GO:0009507|GO:0009308	NULL	protein	NULL	NULL	NULL	NULL	NULL
Dr05762	NULL	NULL	NULL	NULL	NULL	NULL	NULL	NULL
Dr05802	GO:0006810|GO:0009527|GO:0016021|GO:0009941	NULL	chloroplast channel forming outer membrane protein	NULL	NULL	NULL	NULL	NULL
Dr05808	NULL	NULL	NULL	NULL	NULL	NULL	NULL	NULL
Dr05849	GO:0005739	NULL	pentatricopeptide repeat-containing protein	NULL	NULL	NULL	NULL	NULL
Dr05855	GO:0006351	NULL	b3 domain-containing protein	NULL	NULL	NULL	NULL	NULL
Dr05865	GO:0010269|GO:0006534|GO:0030170|GO:0001887|GO:0018283|GO:0031071|GO:0009000|GO:0009507	EC:2.8.1.7|EC:4.4.1.16	protein	NULL	NULL	NULL	NULL	NULL
Dr05867	GO:0010287|GO:0004672|GO:0006468|GO:0005524|GO:0005739	NULL	aarf domain-containing protein	NULL	NULL	NULL	NULL	NULL
Dr05804	GO:0044425|GO:0008152	NULL	glycosylphosphatidylinositol anchor biosynthesis protein 11	NULL	NULL	NULL	NULL	NULL
Dr05827	GO:0045254|GO:0006090|GO:0004149|GO:0004742|GO:0005524|GO:0005739|GO:0006099|GO:0006554|GO:0042967|GO:0006094|GO:0006096	EC:2.3.1.61|EC:2.3.1.12	dihydrolipoyllysine-residue acetyltransferase component 1 of pyruvate dehydrogenase mitochondrial-like	NULL	NULL	NULL	NULL	NULL
Dr05869	NULL	NULL	NULL	NULL	NULL	NULL	NULL	NULL
Dr19859	GO:0044434|GO:0009522	NULL	photosystem i reaction center subunit xi	IPR003757|IPR022980	Photosystem I PsaL, reaction centre subunit XI|Photosystem I, reaction centre subunit XI	GO:0009522|GO:0009538|GO:0015979	NULL	NULL
Dr19888	GO:0006367|GO:0003743|GO:0005634|GO:0046982|GO:0005840|GO:0006446	NULL	transcription initiation factor tfiid subunit 11	IPR006809|IPR009072	TAFII28-like protein|Histone-fold	GO:0005634|GO:0006367|GO:0046982	NULL	NULL
Dr19894	GO:0005739|GO:0009536	NULL	pentatricopeptide repeat-containing protein	NULL	NULL	NULL	NULL	NULL
Dr19879	GO:0019676|GO:0055114|GO:0009501|GO:0051538|GO:0048589|GO:0050660|GO:0009570|GO:0097054|GO:0046686|GO:0060359|GO:0005506|GO:0010181|GO:0016040|GO:0006118	EC:1.4.1.14	glutamate synthase 1	IPR001327|IPR000583|IPR002489|IPR002932|IPR006982|IPR023753|IPR028261|IPR009051|IPR013785|IPR006005|IPR012220|IPR017932	Pyridine nucleotide-disulphide oxidoreductase, NAD-binding domain|Class II glutamine amidotransferase domain|Glutamate synthase, alpha subunit, C-terminal|Glutamate synthase, central-C|Glutamate synthase, central-N|Pyridine nucleotide-disulphide oxidoreductase, FAD/NAD(P)-binding domain|Dihydroprymidine dehydrogenase domain II|Alpha-helical ferredoxin|Aldolase-type TIM barrel|Glutamate synthase, …	GO:0016491|GO:0050660|GO:0055114|GO:0008152|GO:0006537|GO:0015930|GO:0016638|GO:0006807|GO:0051536|GO:0003824|GO:0016639|GO:0005506|GO:0010181|GO:0016040|GO:0045181	EC:1.4.1.14	UniPathway: UPA00045|KEGG: 00250+1.4.1.14|KEGG: 00910+1.4.1.14|MetaCyc: PWY-6963|UniPathway: UPA00045|UniPathway: UPA00634
Dr19899	GO:0006000|GO:0009941|GO:0003873|GO:0006003|GO:0005524|GO:0006013	EC:2.7.1.105	protein chloroplastic-like	NULL	NULL	NULL	NULL	NULL
Dr19904	NULL	NULL	NULL	NULL	NULL	NULL	NULL	NULL
Dr19913	GO:0003723|GO:0033897|GO:0005739	EC:3.1.27.1	pentatricopeptide repeat-containing protein	IPR002885	Pentatricopeptide repeat	NULL	NULL	NULL
Dr19932	GO:0006810|GO:0016020|GO:0009624|GO:0005215	NULL	probable peptide nitrate transporter at2g40460-like	IPR000109|IPR016196	Proton-dependent oligopeptide transporter family|Major facilitator superfamily domain, general substrate transporter	GO:0005215|GO:0006810|GO:0016020	NULL	Reactome: REACT_15518|Reactome: REACT_19419
Dr19909	NULL	NULL	NULL	IPR000626|IPR001611|IPR025875|IPR003591|IPR019955	Ubiquitin domain|Leucine-rich repeat|Leucine rich repeat 4|Leucine-rich repeat, typical subtype|Ubiquitin supergroup	GO:0005515	NULL	NULL
Dr19911	GO:0009536	NULL	uncharacterized protein	NULL	NULL	NULL	NULL	NULL
Dr19957	GO:0016788|GO:0016023|GO:0009987	NULL	pectinesterase family protein	IPR000070|IPR011050|IPR012334|IPR018040	Pectinesterase, catalytic|Pectin lyase fold/virulence factor|Pectin lyase fold|Pectinesterase, active site	GO:0005618|GO:0030599|GO:0042545	EC:3.1.1.11	KEGG: 00040+3.1.1.11|KEGG: 00500+3.1.1.11|MetaCyc: PWY-1081|MetaCyc: PWY-7243|MetaCyc: PWY-7246|MetaCyc: PWY-7248|UniPathway: UPA00545
Dr19948	GO:0009941|GO:0005975|GO:0006108|GO:0009570|GO:0009579|GO:0048046|GO:0005739|GO:0046554|GO:0000166|GO:0006090|GO:0006099|GO:0015976	EC:1.1.1.82	malate dehydrogenase	IPR010945|IPR001236|IPR022383|IPR015955|IPR016040|IPR011273|IPR001252	Malate dehydrogenase, type 2|Lactate/malate dehydrogenase, N-terminal|Lactate/malate dehydrogenase, C-terminal|Lactate dehydrogenase/glycoside hydrolase, family 4, C-terminal|NAD(P)-binding domain|Malate dehydrogenase, NADP-dependent, plants|Malate dehydrogenase, active site	GO:0006108|GO:0016615|GO:0055114|GO:0016491|GO:0016616|GO:0003824|GO:0005975|GO:0046554	EC:1.1.1.37|EC:1.1.1.82	KEGG: 00020+1.1.1.37|KEGG: 00620+1.1.1.37|KEGG: 00630+1.1.1.37|KEGG: 00680+1.1.1.37|KEGG: 00710+1.1.1.37|KEGG: 00720+1.1.1.37|MetaCyc: PWY-1622|MetaCyc: PWY-5392|MetaCyc: PWY-561|MetaCyc: PWY-5690|MetaCyc: PWY-5913|MetaCyc: PWY-6728|MetaCyc: PWY-6969|MetaCyc: PWY-7115|KEGG: 00620+1.1.1.82|KEGG: 00710+1.1.1.82|MetaCyc: PWY-241|MetaCyc: PWY-7117|KEGG: 00020+1.1.1.37|KEGG: 00620+1.1.1.37|KEGG: 00630…
Dr19985	GO:0046686|GO:0046872|GO:0004462|GO:0009507|GO:0005975|GO:0006090	EC:4.4.1.5	glyoxalase i	IPR004360|IPR004361|IPR018146	Glyoxalase/fosfomycin resistance/dioxygenase domain|Glyoxalase I|Glyoxalase I, conserved site	GO:0004462|GO:0046872	EC:4.4.1.5	KEGG: 00620+4.4.1.5|MetaCyc: PWY-5386|UniPathway: UPA00619
Dr20002	GO:0006072|GO:0004369|GO:0004368|GO:0005739|GO:0009331|GO:0055114|GO:0046486|GO:0006118	EC:1.1.3.21|EC:1.1.5.3	glycerol-3-phosphate dehydrogenase mitochondrial-like	IPR006076|IPR000447	FAD dependent oxidoreductase|FAD-dependent glycerol-3-phosphate dehydrogenase	GO:0016491|GO:0055114|GO:0004368|GO:0006072|GO:0009331	EC:1.1.5.3	KEGG: 00564+1.1.5.3|MetaCyc: PWY-4261|MetaCyc: PWY-6118|MetaCyc: PWY-6952
Dr19983	GO:0009536	NULL	uncharacterized protein	NULL	NULL	NULL	NULL	NULL
Dr20007	GO:0010033|GO:0008152|GO:1901700|GO:0003824|GO:0005739	NULL	poly -specific ribonuclease parn-like	IPR006941|IPR012337	Ribonuclease CAF1|Ribonuclease H-like domain	GO:0005634|GO:0003676	NULL	NULL
Dr20008	GO:0006364|GO:0009536|GO:0032259|GO:0008168	EC:2.1.1.0	ribosomal rna small subunit methyltransferase	IPR006027|IPR001678|IPR023267|IPR023268|IPR018314	NusB/RsmB/TIM44|Bacterial Fmu (Sun)/eukaryotic nucleolar NOL1/Nop2p|RNA (C5-cytosine) methyltransferase|RNA (C5-cytosine) methyltransferase, putative Rsm-related, plant|Bacterial Fmu (Sun)/eukaryotic nucleolar NOL1/Nop2p, conserved site	GO:0003723|GO:0006355|GO:0008168	NULL	NULL
Dr20011	GO:0003899|GO:0046872|GO:0005665|GO:0003677|GO:0032549|GO:0006351|GO:0005730|GO:0006144|GO:0006206	EC:2.7.7.6	rna polymerase ii second largest subunit	IPR015712|IPR007120|IPR007641|IPR007642|IPR007644|IPR007645|IPR007646|IPR007647|IPR014724|IPR007121	DNA-directed RNA polymerase, subunit 2|DNA-directed RNA polymerase, subunit 2, domain 6|RNA polymerase Rpb2, domain 7|RNA polymerase Rpb2, domain 2|RNA polymerase, beta subunit, protrusion|RNA polymerase Rpb2, domain 3|RNA polymerase Rpb2, domain 4|RNA polymerase Rpb2, domain 5|RNA polymerase Rpb2, OB-fold|RNA polymerase, beta subunit, conserved site	GO:0003899|GO:0006351|GO:0032549|GO:0003677	EC:2.7.7.6	KEGG: 00230+2.7.7.6|KEGG: 00240+2.7.7.6|Reactome: REACT_1788
Dr20058	GO:0004575|GO:0005886|GO:0048364|GO:0006520|GO:0005634|GO:0005829|GO:0033926|GO:0005982|GO:0005985|GO:0017177	EC:3.2.1.26|EC:3.2.1.48|EC:3.2.1.97	neutral alkaline invertase	IPR024746|IPR008928	Glycosyl hydrolase family 100|Six-hairpin glycosidase-like	GO:0033926|GO:0003824	EC:3.2.1.26	KEGG: 00052+3.2.1.26|KEGG: 00500+3.2.1.26|MetaCyc: PWY-621
Dr05896	GO:0032259|GO:0008168|GO:0005739	EC:2.1.1.0	leucine carboxyl methyltransferase	NULL	NULL	NULL	NULL	NULL
Dr05922	GO:0005739	NULL	rna-binding crs1 domain protein	NULL	NULL	NULL	NULL	NULL
Dr05899	NULL	NULL	NULL	NULL	NULL	NULL	NULL	NULL
Dr05940	GO:0007018|GO:0005875|GO:0005524|GO:0003777|GO:0005874	NULL	p-loop containing nucleoside triphosphate hydrolase-like protein	NULL	NULL	NULL	NULL	NULL
Dr05956	GO:0009941|GO:0006810|GO:0009528|GO:0000166	NULL	catalytic coenzyme binding protein	NULL	NULL	NULL	NULL	NULL
Dr05967	NULL	NULL	NULL	NULL	NULL	NULL	NULL	NULL
Dr05927	GO:0005773|GO:0006508|GO:0009507|GO:0008236|GO:0004180	NULL	serine carboxypeptidase s28 family protein	NULL	NULL	NULL	NULL	NULL
Dr05911	GO:0016787|GO:0044710|GO:0009536	NULL	riboflavin biosynthesis	NULL	NULL	NULL	NULL	NULL
Dr05935	GO:0016023|GO:0005886	NULL	cbs domain-containing protein	NULL	NULL	NULL	NULL	NULL
Dr05942	GO:0016023|GO:0016020|GO:0005783	NULL	gpi transamidase component gpi16 subunit-like protein	NULL	NULL	NULL	NULL	NULL
Dr05964	GO:0010190|GO:0016671|GO:0009055|GO:0045454|GO:0006662|GO:0016853|GO:0015035|GO:0009535|GO:0022900|GO:0006118	EC:1.8.4.0	protein disulfide-isomerase	NULL	NULL	NULL	NULL	NULL
Dr05968	GO:0007165|GO:0009746|GO:0097305|GO:0019001	NULL	gtp-binding protein alpha	NULL	NULL	NULL	NULL	NULL
Dr05991	NULL	NULL	NULL	NULL	NULL	NULL	NULL	NULL
Dr06030	GO:0008643|GO:0016021	NULL	udp-glucuronic acid udp-n-acetylgalactosamine transporter-like	IPR004853	Triose-phosphate transporter domain	NULL	NULL	NULL
Dr06042	GO:0042742|GO:0005739	NULL	tetratricopeptide repeat protein	IPR011990|IPR019734|IPR013026	Tetratricopeptide-like helical|Tetratricopeptide repeat|Tetratricopeptide repeat-containing domain	GO:0005515	NULL	NULL
Dr06064	GO:0016023|GO:0016020	NULL	senescence associated protein 18	NULL	NULL	NULL	NULL	NULL
Dr06073	GO:0016779|GO:0005739	EC:2.7.7.0	polynucleotide adenylyltransferase-like protein	IPR026973|IPR002646	tRNA nucleotidyltransferase|Poly A polymerase, head domain	GO:0009022|GO:0042780|GO:0003723|GO:0006396|GO:0016779	NULL	NULL
Dr06084	GO:0006952|GO:0009607|GO:0016023|GO:0008219|GO:0016021|GO:0008152|GO:0005516	NULL	mlo-like protein 4	IPR004326|IPR025423	Mlo-related protein|Domain of unknown function DUF4149	GO:0006952|GO:0016021	NULL	NULL
Dr06087	GO:0031625|GO:0031461|GO:0006511	NULL	anaphase-promoting complex subunit 2-like	IPR001373|IPR014786|IPR016158|IPR011991	Cullin, N-terminal|Anaphase-promoting complex subunit 2, C-terminal|Cullin homology|Winged helix-turn-helix DNA-binding domain	GO:0006511|GO:0031461|GO:0031625	NULL	UniPathway: UPA00143
Dr06088	GO:0005488	NULL	swi snf complex subunit swi3c-like	IPR001005|IPR007526|IPR009057|IPR011991|IPR017884	SANT/Myb domain|SWIRM domain|Homeodomain-like|Winged helix-turn-helix DNA-binding domain|SANT domain	GO:0003682|GO:0005515|GO:0003677	NULL	NULL
Dr06097	GO:0016559|GO:0005777|GO:0006184|GO:0003924|GO:0010020|GO:0009707|GO:0005525	NULL	protein arc5	IPR022812|IPR001401|IPR027417	Dynamin superfamily|Dynamin, GTPase domain|P-loop containing nucleoside triphosphate hydrolase	GO:0003924|GO:0005525	NULL	NULL
Dr05997	GO:0005388|GO:0003684|GO:0006281|GO:0070588|GO:0016021|GO:0003887|GO:0046872|GO:0005524|GO:0009706|GO:0005789|GO:0005886|GO:0016529|GO:0006260|GO:0042575	EC:3.6.3.8|EC:2.7.7.7	dna polymerase kappa-like	NULL	NULL	NULL	NULL	NULL
Dr06025	GO:0003676|GO:0000166|GO:0009536	NULL	nucleic acid binding protein	IPR000504|IPR012921|IPR012677	RNA recognition motif domain|Spen paralogue and orthologue SPOC, C-terminal|Nucleotide-binding, alpha-beta plait	GO:0003676|GO:0000166	NULL	NULL
Dr06072	GO:0009536|GO:0000166|GO:0004386	NULL	helicase domain-containing protein	IPR011545|IPR001650|IPR007502|IPR011709|IPR027417|IPR014001|IPR002464	DNA/RNA helicase, DEAD/DEAH box type, N-terminal|Helicase, C-terminal|Helicase-associated domain|Domain of unknown function DUF1605|P-loop containing nucleoside triphosphate hydrolase|Helicase, superfamily 1/2, ATP-binding domain|DNA/RNA helicase, ATP-dependent, DEAH-box type, conserved site	GO:0003676|GO:0005524|GO:0008026|GO:0004386	NULL	NULL
Dr06083	GO:0016491|GO:0016740|GO:0051539|GO:0016020|GO:0005783|GO:0009451	NULL	cdk5 regulatory subunit-associated protein 1-like 1-like	IPR023970|IPR013848|IPR007197|IPR023404|IPR006638|IPR005839|IPR006466|IPR002792|IPR020612	Methylthiotransferase/radical SAM-type protein|Methylthiotransferase, N-terminal|Radical SAM|Radical SAM, alpha/beta horseshoe|Elongator protein 3/MiaB/NifB|Methylthiotransferase|MiaB-like tRNA modifying enzyme, archaeal-type|TRAM domain|Methylthiotransferase, conserved site	GO:0003824|GO:0009451|GO:0051539|GO:0051536|GO:0016740|GO:0043412	EC:2.-.-.-	KEGG: 00231+2.-.-.-
Dr20101	GO:0006260|GO:0009507|GO:0005634	NULL	protein	IPR005339|IPR021151|IPR027369	GINS complex, subunit Psf1|GINS complex|DinB/YfiT-like putative metal-dependent hydrolase	NULL	NULL	NULL
Dr20130	NULL	NULL	NULL	NULL	NULL	NULL	NULL	NULL
Dr20132	GO:0051082|GO:0031072|GO:0009536	NULL	protein	IPR001305	Heat shock protein DnaJ, cysteine-rich domain	GO:0031072|GO:0051082	NULL	NULL
Dr20135	GO:0022890|GO:0016491|GO:0016023|GO:0034220|GO:0046915|GO:0006829|GO:0016020	NULL	zinc transporter	IPR003689	Zinc/iron permease	GO:0016020|GO:0030001|GO:0046873|GO:0055085	NULL	NULL
Dr20186	GO:0009536	NULL	pentatricopeptide repeat-containing protein	IPR002885|IPR011990	Pentatricopeptide repeat|Tetratricopeptide-like helical	GO:0005515	NULL	NULL
Dr20202	GO:0004553|GO:0016023|GO:0000272	EC:3.2.1.0	endoglucanase 16	IPR001701|IPR008928|IPR012341	Glycoside hydrolase, family 9|Six-hairpin glycosidase-like|Six-hairpin glycosidase	GO:0004553|GO:0005975|GO:0003824	EC:3.2.1.4	KEGG: 00500+3.2.1.4|MetaCyc: PWY-6788|MetaCyc: PWY-6805
Dr20207	GO:0008080|GO:0009751|GO:0042967	NULL	obp3-responsive protein 4	NULL	NULL	NULL	NULL	NULL
Dr20304	GO:0050660|GO:0016491|GO:0055114|GO:0009507|GO:0015979	NULL	uncharacterized protein cbei_0202-like	IPR002938	Monooxygenase, FAD-binding	NULL	NULL	NULL
Dr20312	GO:0009555|GO:0015693|GO:0005886|GO:0055085|GO:0015095|GO:0005739	NULL	magnesium transporter mrs2-4-like	IPR026573	Magnesium transporter MRS2/LPE10	GO:0015095|GO:0015693	NULL	NULL
Dr06149	NULL	NULL	NULL	NULL	NULL	NULL	NULL	NULL
Dr20411	GO:0004252|GO:0009570|GO:0006508	EC:3.4.21.0	atp-dependent clp protease proteolytic subunit-related protein chloroplastic-like	IPR023562|IPR001907	Clp protease proteolytic subunit /Translocation-enhancing protein TepA|ClpP	GO:0004252|GO:0006508	NULL	NULL
Dr20422	GO:0006166|GO:0005737|GO:0052657|GO:0046098|GO:0046100|GO:0004422|GO:0009845	EC:2.4.2.8	hypoxanthine phosphoribosyltransferase	IPR000836	Phosphoribosyltransferase domain	GO:0009116	NULL	NULL
Dr20423	GO:0009536	NULL	protein	IPR011990|IPR013026	Tetratricopeptide-like helical|Tetratricopeptide repeat-containing domain	GO:0005515	NULL	NULL
Dr20432	GO:0016740|GO:0005739	NULL	uncharacterized udp-glucosyltransferase	IPR002885|IPR011990	Pentatricopeptide repeat|Tetratricopeptide-like helical	GO:0005515	NULL	NULL
Dr20399	GO:0008237|GO:0006508|GO:0008270|GO:0004177	EC:3.4.11.0	puromycin-sensitive aminopeptidase	IPR001930|IPR014782|IPR024571	Peptidase M1, alanine aminopeptidase/leukotriene A4 hydrolase|Peptidase M1, membrane alanine aminopeptidase, N-terminal|ERAP1-like C-terminal domain	GO:0006508|GO:0008237|GO:0008270	NULL	NULL
Dr20401	GO:0009536	NULL	nol1 nop2 sun family protein	IPR001678|IPR023267	Bacterial Fmu (Sun)/eukaryotic nucleolar NOL1/Nop2p|RNA (C5-cytosine) methyltransferase	NULL	NULL	NULL
Dr20424	GO:0016491|GO:0016310|GO:0004672|GO:0016020|GO:0000166	NULL	probable lrr receptor-like serine threonine-protein kinase at1g34110-like	IPR000719|IPR001611|IPR013210|IPR011009|IPR002290|IPR003591|IPR017441|IPR008271	Protein kinase domain|Leucine-rich repeat|Leucine-rich repeat-containing N-terminal, type 2|Protein kinase-like domain|Serine/threonine- / dual specificity protein kinase, catalytic domain|Leucine-rich repeat, typical subtype|Protein kinase, ATP binding site|Serine/threonine-protein kinase, active site	GO:0004672|GO:0005524|GO:0006468|GO:0005515|GO:0016772|GO:0004674	NULL	NULL
Dr20438	GO:0010478|GO:0009579|GO:0009570	NULL	post-illumination chlorophyll fluorescence increase protein	NULL	NULL	NULL	NULL	NULL
Dr20560	NULL	NULL	NULL	IPR004343|IPR001878|IPR018144	Plus-3|Zinc finger, CCHC-type|Plus-3 domain, subgroup	GO:0003677|GO:0005634|GO:0006352|GO:0016570|GO:0003676|GO:0008270	NULL	NULL
Dr20607	GO:0008168|GO:0032259	EC:2.1.1.0	leucine carboxyl methyltransferase	IPR007213|IPR016651	Leucine carboxyl methyltransferase|Leucine carboxyl methyltransferase 1, LCMT1	GO:0008168|GO:0032259	EC:2.1.1.-	KEGG: 00130+2.1.1.-|KEGG: 00253+2.1.1.-|KEGG: 00270+2.1.1.-|KEGG: 00340+2.1.1.-|KEGG: 00350+2.1.1.-|KEGG: 00360+2.1.1.-|KEGG: 00380+2.1.1.-|KEGG: 00450+2.1.1.-|KEGG: 00522+2.1.1.-|KEGG: 00624+2.1.1.-|KEGG: 00627+2.1.1.-|KEGG: 00860+2.1.1.-|KEGG: 00940+2.1.1.-|KEGG: 00941+2.1.1.-|KEGG: 00942+2.1.1.-|KEGG: 00945+2.1.1.-|KEGG: 00950+2.1.1.-|KEGG: 00981+2.1.1.-
Dr20568	GO:0004609|GO:0008654|GO:0006544|GO:0006563|GO:0006566|GO:0046486	EC:4.1.1.65	phosphatidylserine decarboxylase	IPR005221|IPR003817	Phosphatidylserine decarboxylase|Phosphatidylserine decarboxylase-related	GO:0004609|GO:0008654	EC:4.1.1.65	KEGG: 00564+4.1.1.65|MetaCyc: PWY-5669|UniPathway: UPA00558
Dr20573	GO:0003995|GO:0005777|GO:0009620|GO:0003997|GO:0009611|GO:0009695|GO:0006635|GO:0009555|GO:0050660|GO:0002213|GO:0001676|GO:0046686|GO:0006118|GO:0006637	EC:1.3.99.3|EC:1.3.3.6	peroxisomal acyl- oxidase 1a	IPR012258|IPR002655|IPR006091|IPR009075|IPR009100|IPR013786	Acyl-CoA oxidase|Acyl-CoA oxidase, C-terminal|Acyl-CoA oxidase/dehydrogenase, central domain|Acyl-CoA dehydrogenase/oxidase C-terminal|Acyl-CoA dehydrogenase/oxidase, N-terminal and middle domain|Acyl-CoA dehydrogenase/oxidase, N-terminal	GO:0003997|GO:0005777|GO:0006631|GO:0050660|GO:0055114|GO:0006635|GO:0003995|GO:0016627|GO:0008152	EC:1.3.3.6	KEGG: 00071+1.3.3.6|KEGG: 00592+1.3.3.6|MetaCyc: PWY-5136|MetaCyc: PWY-6837|MetaCyc: PWY-6920|MetaCyc: PWY-7007|MetaCyc: PWY-735
Dr20603	NULL	NULL	NULL	IPR006849|IPR015943	IKI3|WD40/YVTN repeat-like-containing domain	GO:0005515	NULL	NULL
Dr20604	GO:0016023|GO:0005739	NULL	uncharacterized protein	IPR018881	Uncharacterised protein family UPF0565	NULL	NULL	NULL
Dr20582	NULL	NULL	NULL	IPR000198|IPR008936	Rho GTPase-activating protein domain|Rho GTPase activation protein	GO:0007165|GO:0005622	NULL	Reactome: REACT_11044
Dr20583	NULL	NULL	NULL	IPR001206|IPR016064	Diacylglycerol kinase, catalytic domain|ATP-NAD kinase-like domain	GO:0004143|GO:0007205|GO:0003951|GO:0008152	NULL	NULL
Dr06210	GO:0016021|GO:0006508|GO:0004252|GO:0009507	EC:3.4.21.0	rhomboid family protein	IPR002610|IPR022764	Peptidase S54, rhomboid|Peptidase S54, rhomboid domain	GO:0004252|GO:0006508|GO:0016021	NULL	NULL
Dr06222	NULL	NULL	NULL	IPR013899|IPR002625	Domain of unknown function DUF1771|Smr protein/MutS2 C-terminal	NULL	NULL	NULL
Dr06167	GO:0016787|GO:0009507	NULL	metallo-beta-lactamase domain-containing protein	IPR001279	Beta-lactamase-like	GO:0016787	NULL	NULL
Dr06257	GO:0005622|GO:0006396	NULL	pre-mrna-splicing factor clf1	IPR003107|IPR011990|IPR013026	RNA-processing protein, HAT helix|Tetratricopeptide-like helical|Tetratricopeptide repeat-containing domain	GO:0005622|GO:0006396|GO:0005515	NULL	NULL
Dr06258	GO:0006761|GO:0004326|GO:0046901|GO:0005524|GO:0005759|GO:0008841|GO:0009793|GO:0006536|GO:0046656	EC:6.3.2.17|EC:6.3.2.12	folylpolyglutamate synthase	IPR001645|IPR013221|IPR018109	Folylpolyglutamate synthetase|Mur ligase, central|Folylpolyglutamate synthetase, conserved site	GO:0004326|GO:0005524|GO:0009396|GO:0009058	EC:6.3.2.17	KEGG: 00790+6.3.2.17|MetaCyc: PWY-2161|UniPathway: UPA00850|UniPathway: UPA00219
Dr06279	NULL	NULL	NULL	NULL	NULL	NULL	NULL	NULL
Dr06288	NULL	NULL	NULL	IPR024974	Sde2 N-terminal domain	NULL	NULL	NULL
Dr06289	GO:0016567|GO:0004842|GO:0008270	EC:6.3.2.19	ubiquitin-protein ligase ubr7	IPR003126|IPR011011|IPR013083|IPR001965|IPR013993	Zinc finger, N-recognin|Zinc finger, FYVE/PHD-type|Zinc finger, RING/FYVE/PHD-type|Zinc finger, PHD-type|Zinc finger, N-recognin, metazoa	GO:0004842|GO:0008270|GO:0005515	EC:6.3.2.-	KEGG: 00300+6.3.2.-|KEGG: 00380+6.3.2.-
Dr06299	GO:0046686|GO:0005773|GO:0009507|GO:0005886	NULL	4-methyl-5(b-hydroxyethyl)-thiazole monophosphate biosynthesis	IPR002818|IPR006287	ThiJ/PfpI|DJ-1	NULL	NULL	NULL
Dr06313	GO:0016023	NULL	heme-binding protein 2-like	IPR006917|IPR011256	SOUL haem-binding protein|Regulatory factor, effector binding domain	NULL	NULL	NULL
Dr06214	GO:0005886|GO:0006468|GO:0005524|GO:0004674|GO:0009536|GO:0009069	EC:2.7.11.0	receptor protein kinase perk1	IPR001245|IPR011009|IPR002290|IPR000719|IPR017441|IPR008271	Serine-threonine/tyrosine-protein kinase catalytic domain|Protein kinase-like domain|Serine/threonine- / dual specificity protein kinase, catalytic domain|Protein kinase domain|Protein kinase, ATP binding site|Serine/threonine-protein kinase, active site	GO:0004672|GO:0006468|GO:0016772|GO:0005524|GO:0004674	NULL	NULL
Dr06233	GO:0016020|GO:0006508|GO:0009536|GO:0008233	NULL	protein	IPR003675	CAAX amino terminal protease	GO:0016020	NULL	NULL
Dr06275	GO:0005739	NULL	esterase-like protein	IPR026555	KAT8 regulatory NSL complex subunit 3/Testis-expressed sequence 30 protein	NULL	NULL	NULL
Dr06295	GO:0097159|GO:0043167|GO:1901363	NULL	zinc finger ccch domain-containing protein 37	IPR000571	Zinc finger, CCCH-type	GO:0046872	NULL	NULL
Dr06302	NULL	NULL	NULL	IPR001487|IPR027353	Bromodomain|NET domain	GO:0005515	NULL	NULL
Dr06311	GO:0005794|GO:0004571|GO:0048364|GO:0005509|GO:0006491|GO:0016020	EC:3.2.1.113	mannosyl-oligosaccharide -alpha-mannosidase mns3-like	IPR001382	Glycoside hydrolase, family 47	GO:0004571|GO:0005509|GO:0016020	NULL	NULL
Dr06352	GO:0003676|GO:0008168|GO:0032259	EC:2.1.1.0	methyltransferase-like protein 5	IPR002052	DNA methylase, N-6 adenine-specific, conserved site	GO:0003676|GO:0008168|GO:0032259	NULL	NULL
Dr06353	GO:0016023	NULL	glyoxal oxidase-related protein	IPR009880|IPR015202|IPR011043|IPR014756|IPR015916|IPR013783	Glyoxal oxidase, N-terminal|Domain of unknown function DUF1929|Galactose oxidase/kelch, beta-propeller|Immunoglobulin E-set|Galactose oxidase, beta-propeller|Immunoglobulin-like fold	NULL	EC:1.1.3.9	KEGG: 00052+1.1.3.9
Dr06355	GO:0006470|GO:0004692|GO:0046872|GO:0005524|GO:0004722|GO:0008603|GO:0005952|GO:0005886|GO:0009069|GO:0008287|GO:0045859	EC:2.7.11.12	protein phosphatase 2c and cyclic nucleotide-binding kinase domain-containing protein	IPR015655|IPR000595|IPR000719|IPR001932|IPR018490|IPR011009|IPR014710|IPR002373|IPR002290|IPR000222	Protein phosphatase 2C|Cyclic nucleotide-binding domain|Protein kinase domain|Protein phosphatase 2C (PP2C)-like domain|cAMP/cGMP-dependent protein kinase|Cyclic nucleotide-binding-like|Protein kinase-like domain|RmlC-like jelly roll fold|Serine/threonine- / dual specificity protein kinase, catalytic domain|Protein phosphatase 2C, manganese/magnesium aspartate binding site	GO:0004672|GO:0005524|GO:0006468|GO:0003824|GO:0016772|GO:0001932|GO:0005952|GO:0008603|GO:0004722|GO:0006470	NULL	Reactome: REACT_1505|Reactome: REACT_15380
Dr06356	GO:0016787|GO:0009987	NULL	zinc phosphodiesterase elac protein 2-like	IPR027794|IPR001279|IPR013471	tRNase Z endonuclease|Beta-lactamase-like|Ribonuclease Z	GO:0008033|GO:0016787|GO:0016891|GO:0042779	NULL	NULL
Dr06365	GO:0006506|GO:0017176	EC:2.4.1.198	c transferase	IPR001296|IPR013234	Glycosyl transferase, family 1|PIGA, GPI anchor biosynthesis	GO:0009058|GO:0006506	EC:2.4.1.198	KEGG: 00563+2.4.1.198|UniPathway: UPA00196
Dr06368	NULL	NULL	NULL	IPR001810	F-box domain	GO:0005515	NULL	NULL
Dr06369	GO:0005488	NULL	rna polymerase ii transcriptional coactivator kelp	IPR003173|IPR014876|IPR009044|IPR009057	Transcriptional coactivator p15 (PC4)|DEK, C-terminal|ssDNA-binding transcriptional regulator|Homeodomain-like	GO:0003677|GO:0003713|GO:0006355	NULL	NULL
Dr06371	GO:0048364|GO:0005802|GO:0042542|GO:0009864|GO:0010120|GO:0009651|GO:0000746|GO:2000038|GO:0009524|GO:0051301|GO:0006468|GO:0007067|GO:0000165|GO:0004707|GO:0009409|GO:0009737|GO:0009574|GO:2000037|GO:0005524|GO:0009723|GO:0048481|GO:0080136|GO:0007178|GO:0009069	EC:2.7.11.24	mitogen-activated protein kinase	IPR000719|IPR011009|IPR008351|IPR002290|IPR017441|IPR008271|IPR003527	Protein kinase domain|Mitogen-activated protein (MAP) kinase, JNK|Protein kinase-like domain|Serine/threonine- / dual specificity protein kinase, catalytic domain|Protein kinase, ATP binding site|Serine/threonine-protein kinase, active site|Mitogen-activated protein (MAP) kinase, conserved site	GO:0004672|GO:0005524|GO:0006468|GO:0016772|GO:0004707|GO:0004674	NULL	Reactome: REACT_6900
Dr06337	GO:0005739	NULL	protein	IPR021434	Protein of unknown function DUF3082	NULL	NULL	NULL
Dr06339	GO:0050660|GO:0005777|GO:0006635|GO:0003995|GO:0003997|GO:0006118|GO:0006637	EC:1.3.99.3|EC:1.3.3.6	acyl- oxidase acx3	IPR012258|IPR009075|IPR002655|IPR006091|IPR009100|IPR013786	Acyl-CoA oxidase|Acyl-CoA dehydrogenase/oxidase C-terminal|Acyl-CoA oxidase, C-terminal|Acyl-CoA oxidase/dehydrogenase, central domain|Acyl-CoA dehydrogenase/oxidase, N-terminal and middle domain|Acyl-CoA dehydrogenase/oxidase, N-terminal	GO:0003997|GO:0005777|GO:0006631|GO:0050660|GO:0055114|GO:0016627|GO:0006635|GO:0003995|GO:0008152	EC:1.3.3.6	KEGG: 00071+1.3.3.6|KEGG: 00592+1.3.3.6|MetaCyc: PWY-5136|MetaCyc: PWY-6837|MetaCyc: PWY-6920|MetaCyc: PWY-7007|MetaCyc: PWY-735
Dr06342	GO:0006461|GO:0016740|GO:0005739	NULL	atp synthase mitochondrial f1 complex assembly factor 1	IPR010591	ATP11	GO:0005739|GO:0006461	NULL	NULL
Dr06344	NULL	NULL	NULL	NULL	NULL	NULL	NULL	NULL
Dr06351	NULL	NULL	NULL	IPR008383|IPR016024|IPR011989	Apoptosis inhibitory 5|Armadillo-type fold|Armadillo-like helical	GO:0005488	NULL	NULL
Dr06366	NULL	NULL	NULL	IPR018610|IPR008942|IPR002014	Protein of unknown function DUF2043|ENTH/VHS|VHS	GO:0006886	NULL	NULL
Dr06380	GO:0019538|GO:0016310|GO:0004672	NULL	atp binding protein	IPR001245|IPR011009|IPR002290|IPR000719|IPR017441|IPR008271	Serine-threonine/tyrosine-protein kinase catalytic domain|Protein kinase-like domain|Serine/threonine- / dual specificity protein kinase, catalytic domain|Protein kinase domain|Protein kinase, ATP binding site|Serine/threonine-protein kinase, active site	GO:0004672|GO:0006468|GO:0016772|GO:0005524|GO:0004674	NULL	NULL
Dr06394	GO:0000166|GO:0009536	NULL	rossmann-fold nad -binding domain-containing protein	IPR013857|IPR008979|IPR016040	NADH:ubiquinone oxidoreductase intermediate-associated protein 30|Galactose-binding domain-like|NAD(P)-binding domain	NULL	NULL	NULL
Dr06345	GO:0004553|GO:0005978|GO:0043169|GO:0003844|GO:0009791|GO:0009507|GO:0005982|GO:0005985	EC:3.2.1.0|EC:2.4.1.18	alpha amylase family protein	IPR015902|IPR006047|IPR004193|IPR017853|IPR014756|IPR013783|IPR013781	Glycoside hydrolase, family 13|Glycosyl hydrolase, family 13, catalytic domain|Glycoside hydrolase, family 13, N-terminal|Glycoside hydrolase, superfamily|Immunoglobulin E-set|Immunoglobulin-like fold|Glycoside hydrolase, catalytic domain	GO:0003824|GO:0005975|GO:0043169|GO:0004553	NULL	NULL
Dr06475	GO:0004044|GO:0006364|GO:0009113|GO:0009116|GO:0009507|GO:0006536|GO:0006541	EC:2.4.2.14	protein	IPR000238|IPR023799|IPR015946|IPR020053	Ribosome-binding factor A|Ribosome-binding factor A domain|K homology domain-like, alpha/beta|Ribosome-binding factor A, conserved site	GO:0006364	NULL	NULL
Dr06478	GO:0005737|GO:0007018|GO:0005875|GO:0048364|GO:0005524|GO:0003777|GO:0005874	NULL	armadillo repeat-containing kinesin-like protein 2-like	IPR027640|IPR001752|IPR000225|IPR016024|IPR027417|IPR011989|IPR019821	Kinesin-like protein|Kinesin, motor domain|Armadillo|Armadillo-type fold|P-loop containing nucleoside triphosphate hydrolase|Armadillo-like helical|Kinesin, motor region, conserved site	GO:0003777|GO:0005871|GO:0007018|GO:0005524|GO:0008017|GO:0005515|GO:0005488	NULL	NULL
Dr06497	GO:0004674|GO:0007049|GO:0033044|GO:0000723|GO:0009536|GO:0000003|GO:0005524|GO:0016310|GO:0006974|GO:0009069	EC:2.7.11.0	serine threonine-protein kinase atr-like	IPR000403|IPR003151|IPR003152|IPR012993|IPR016024|IPR011009|IPR011990|IPR014009|IPR018936	Phosphatidylinositol 3-/4-kinase, catalytic domain|PIK-related kinase, FAT|PIK-related kinase, FATC|UME|Armadillo-type fold|Protein kinase-like domain|Tetratricopeptide-like helical|PIK-related kinase|Phosphatidylinositol 3/4-kinase, conserved site	GO:0016773|GO:0005515|GO:0004674|GO:0005488|GO:0016772	NULL	NULL
Dr06505	NULL	NULL	NULL	IPR002885|IPR002625	Pentatricopeptide repeat|Smr protein/MutS2 C-terminal	NULL	NULL	NULL
Dr06443	NULL	NULL	NULL	IPR010358	Brain/reproductive organ-expressed protein	NULL	NULL	NULL
Dr06469	GO:0009536	NULL	protein	IPR006571	TLDc	NULL	NULL	NULL
Dr06506	NULL	NULL	NULL	IPR009378	Non-SMC condensin II complex, subunit H2-like	NULL	NULL	NULL
Dr06422	GO:0016491|GO:0010181|GO:0009536|GO:0055114	NULL	glutamyl-trna reductase binding protein	IPR019595|IPR012349	Domain of unknown function DUF2470|FMN-binding split barrel	GO:0010181|GO:0016491|GO:0055114	NULL	NULL
Dr06423	GO:0046872|GO:0009536|GO:0004638|GO:0005524|GO:0034023|GO:0006189|GO:0006144|GO:0009320	EC:4.1.1.21|EC:5.4.99.18	phosphoribosylaminoimidazole carboxylase	IPR000031|IPR003135|IPR011054|IPR016185|IPR013815|IPR013816|IPR005875|IPR016301|IPR011761	N5-carboxyaminoimidazole ribonucleotide mutase PurE domain|ATP-grasp fold, ATP-dependent carboxylate-amine ligase-type|Rudiment single hybrid motif|Pre-ATP-grasp domain|ATP-grasp fold, subdomain 1|ATP-grasp fold, subdomain 2|Phosphoribosylaminoimidazole carboxylase, ATPase subunit|Phosphoribosylaminoimidazole carboxylase|ATP-grasp fold	GO:0006189|GO:0034023|GO:0003824|GO:0005524|GO:0004638|GO:0046872	EC:4.1.1.21	UniPathway: UPA00074|KEGG: 00230+4.1.1.21|MetaCyc: PWY-6124|UniPathway: UPA00074
Dr20710	GO:0004197|GO:0006508	EC:3.4.22.0	peptidase c13-like protein	IPR001096|IPR028361	Peptidase C13, legumain|GPI-anchor transamidase	GO:0004197|GO:0006508|GO:0003923|GO:0016255|GO:0042765	EC:3.-.-.-	KEGG: 00231+3.-.-.-|KEGG: 00563+3.-.-.-|KEGG: 00983+3.-.-.-|UniPathway: UPA00196
Dr20705	GO:0005743|GO:0055085|GO:0016021|GO:0005215	NULL	adp atp translocase-like protein	IPR018108|IPR023395|IPR002067	Mitochondrial substrate/solute carrier|Mitochondrial carrier protein|Mitochondrial carrier domain	GO:0055085	NULL	NULL
Dr20765	GO:0009507|GO:0016020	NULL	protein	IPR021414	Protein of unknown function DUF3054	NULL	NULL	NULL
Dr20767	GO:0008233|GO:0009644|GO:0042542|GO:0016020|GO:0009408|GO:0009536	NULL	sterol regulatory element-binding protein site 2	NULL	NULL	NULL	NULL	NULL
Dr20777	NULL	NULL	NULL	IPR007751	Domain of unknown function DUF676, lipase-like	NULL	NULL	NULL
Dr20783	GO:0055114|GO:0046872|GO:0019288|GO:0050992|GO:0051538|GO:0016114|GO:0009570|GO:0046429|GO:0051745	EC:1.17.7.1|EC:1.17.1.2	4-hydroxy-3-methylbut-2-enyl diphosphate reductase	IPR003451	LytB protein	GO:0019288|GO:0055114	EC:1.17.1.2	KEGG: 00900+1.17.1.2|UniPathway: UPA00056|UniPathway: UPA00059
Dr06523	NULL	NULL	NULL	IPR002885	Pentatricopeptide repeat	NULL	NULL	NULL
Dr06555	GO:0019295|GO:0043817|GO:0004252|GO:0005618|GO:0010286	EC:4.4.1.19|EC:3.4.21.0	phosphosulfolactate synthase-related protein	IPR015500|IPR003830|IPR013785	Peptidase S8, subtilisin-related|(2R)-phospho-3-sulpholactate synthase, ComA|Aldolase-type TIM barrel	GO:0019295|GO:0003824	EC:4.4.1.19	KEGG: 00680+4.4.1.19
Dr06581	GO:0003824	NULL	rossmann-fold nad -binding domain-containing protein	IPR001509|IPR016040	NAD-dependent epimerase/dehydratase|NAD(P)-binding domain	GO:0003824|GO:0044237|GO:0050662	NULL	NULL
Dr20854	GO:0000085|GO:0010388	NULL	cop9 signalosome complex subunit 3	IPR000717|IPR011991|IPR011990	Proteasome component (PCI) domain|Winged helix-turn-helix DNA-binding domain|Tetratricopeptide-like helical	GO:0005515	NULL	NULL
Dr20882	NULL	NULL	NULL	IPR010410	Protein of unknown function DUF1005	NULL	NULL	NULL
Dr20890	GO:0003723|GO:0032259|GO:0005886|GO:0008168	EC:2.1.1.0	ribosomal rna large subunit methyltransferase i-like	IPR019614|IPR015947|IPR002478	S-adenosylmethionine-dependent methyltransferase|PUA-like domain|Pseudouridine synthase/archaeosine transglycosylase	GO:0008168|GO:0003723	NULL	NULL
Dr20927	GO:0005509	NULL	calmodulin-related protein	IPR011992|IPR002048|IPR018247	EF-hand domain pair|EF-hand domain|EF-Hand 1, calcium-binding site	GO:0005509	NULL	NULL
Dr20939	GO:0004816|GO:0006421|GO:0003676|GO:0005739|GO:0048481|GO:0005524|GO:0009507|GO:0006522|GO:0006531	EC:6.1.1.22	protein	IPR018150|IPR004522|IPR004364|IPR004365|IPR012340|IPR002312|IPR006195	Aminoacyl-tRNA synthetase, class II (D/K/N)-like|Asparagine-tRNA ligase|Aminoacyl-tRNA synthetase, class II (D/K/N)|OB-fold nucleic acid binding domain, AA-tRNA synthetase-type|Aspartyl/Asparaginyl-tRNA synthetase, class IIb|Nucleic acid-binding, OB-fold|Aminoacyl-tRNA synthetase, class II	GO:0000166|GO:0004812|GO:0005524|GO:0006418|GO:0004816|GO:0005737|GO:0006421|GO:0003676	EC:6.1.1.22	Reactome: REACT_71|KEGG: 00970+6.1.1.22|Reactome: REACT_71
Dr20932	GO:0016020|GO:0009941	NULL	uncharacterized protein	NULL	NULL	NULL	NULL	NULL
Dr20933	GO:0006790|GO:0047627|GO:0005777|GO:0009150|GO:0004780|GO:0005739	EC:3.6.2.1|EC:2.7.7.5	histidine triad family protein	IPR001310|IPR011146	Histidine triad (HIT) protein|HIT-like domain	GO:0003824	NULL	NULL
Dr20934	GO:0005739	NULL	protein	IPR007573	Protein of unknown function DUF566	NULL	NULL	NULL
Dr20936	GO:0006259|GO:0016788|GO:0006974	NULL	holliday junction resolvase	IPR005227|IPR012337|IPR006641	Resolvase, holliday junction-type, YqgF-like|Ribonuclease H-like domain|YqgF/RNase H-like domain	GO:0005737|GO:0006281|GO:0006310|GO:0006974|GO:0016788|GO:0003676|GO:0006139	NULL	NULL
Dr20990	GO:0044765|GO:0050896|GO:0016020|GO:0009536	NULL	crt homolog 1-like	NULL	NULL	NULL	NULL	NULL
Dr06624	GO:0050896|GO:0016310|GO:0016301	NULL	map4 kinase	IPR000719|IPR011009|IPR002290|IPR017441	Protein kinase domain|Protein kinase-like domain|Serine/threonine- / dual specificity protein kinase, catalytic domain|Protein kinase, ATP binding site	GO:0004672|GO:0005524|GO:0006468|GO:0016772	NULL	NULL
Dr06621	NULL	NULL	NULL	IPR006840|IPR013024	ChaC-like protein|Butirosin biosynthesis, BtrG-like	NULL	NULL	NULL
Dr06641	NULL	NULL	NULL	IPR001810	F-box domain	GO:0005515	NULL	NULL
Dr06647	NULL	NULL	NULL	NULL	NULL	NULL	NULL	NULL
Dr06664	GO:0003735|GO:0015934|GO:0006412|GO:0042254	NULL	50s ribosomal protein l14	IPR000218|IPR023571|IPR005745|IPR019972	Ribosomal protein L14b/L23e|Ribosomal protein L14 domain|Ribosomal protein L14, bacterial-type|Ribosomal protein L14 conserved site	GO:0003735|GO:0005840|GO:0006412|GO:0015934	NULL	NULL
Dr06669	GO:0009507	NULL	set domain-containing protein	IPR001214	SET domain	GO:0005515	NULL	NULL
Dr06740	GO:0009753|GO:0034765|GO:0009414|GO:0009409|GO:0071805|GO:0009737|GO:0015271|GO:0005634|GO:0008076	NULL	potassium channel skor	IPR000595|IPR005821|IPR021789|IPR020683|IPR018490|IPR014710|IPR002110|IPR003938	Cyclic nucleotide-binding domain|Ion transport domain|Potassium channel, plant-type|Ankyrin repeat-containing domain|Ankyrin repeat|Potassium channel, voltage-dependent, EAG/ELK/ERG|Cyclic nucleotide-binding-like|RmlC-like jelly roll fold	GO:0005216|GO:0006811|GO:0016020|GO:0055085|GO:0005515|GO:0005249|GO:0006813	NULL	NULL
Dr06760	GO:0044765	NULL	iaa-alanine resistance protein 1	IPR003689	Zinc/iron permease	GO:0016020|GO:0030001|GO:0046873|GO:0055085	NULL	NULL
Dr06776	NULL	NULL	NULL	IPR013633|IPR011990|IPR003107	siRNA-mediated silencing protein NRDE-2|Tetratricopeptide-like helical|RNA-processing protein, HAT helix	GO:0005515|GO:0005622|GO:0006396	NULL	NULL
Dr06738	GO:0008152|GO:0003824|GO:0005739|GO:0000166	NULL	rossmann-fold nad -binding domain-containing protein	IPR000594|IPR009036|IPR016040	UBA/THIF-type NAD/FAD binding fold|Molybdenum cofactor biosynthesis, MoeB|NAD(P)-binding domain	GO:0003824	NULL	NULL
Dr06769	GO:0005739|GO:0007275	NULL	protein	IPR019787|IPR011011|IPR013083|IPR001965|IPR019786	Zinc finger, PHD-finger|Zinc finger, FYVE/PHD-type|Zinc finger, RING/FYVE/PHD-type|Zinc finger, PHD-type|Zinc finger, PHD-type, conserved site	GO:0005515|GO:0008270	NULL	NULL
Dr06698	GO:0016020|GO:0004222|GO:0006508	EC:3.4.24.0	peptidase m48 family protein	IPR001915	Peptidase M48	GO:0004222|GO:0006508|GO:0016020	NULL	NULL
Dr06725	GO:0050896|GO:0016779|GO:1901363|GO:0097159	EC:2.7.7.0	rna-dependent rna polymerase	IPR007855	RNA-dependent RNA polymerase, eukaryotic-type	GO:0003968	EC:2.7.7.48	KEGG: 00230+2.7.7.48
Dr21001	GO:0005840|GO:0003735|GO:0006412|GO:0042254	NULL	structural constituent of	IPR005484	Ribosomal protein L18/L5	GO:0003735|GO:0005622|GO:0005840|GO:0006412	NULL	NULL
Dr21025	GO:0008270	NULL	zinc ion binding protein	IPR007527	Zinc finger, SWIM-type	GO:0008270	NULL	NULL
Dr21035	NULL	NULL	NULL	IPR008545	WEB family	NULL	NULL	NULL
Dr21038	GO:0005509	NULL	uncharacterized protein	NULL	NULL	NULL	NULL	NULL
Dr21073	GO:0006396|GO:0030529	NULL	ribonuclease p-like protein	IPR002730|IPR023534	Ribonuclease P/MRP, subunit p29|Rof/RNase P-like	GO:0000172|GO:0003723|GO:0004540|GO:0006364|GO:0006379|GO:0008033|GO:0030677	NULL	NULL
Dr21081	NULL	NULL	NULL	IPR000477|IPR021891|IPR003545	Reverse transcriptase|Telomerase ribonucleoprotein complex - RNA-binding domain|Telomere reverse transcriptase	GO:0003723|GO:0003964|GO:0006278|GO:0003677|GO:0003721|GO:0005634	NULL	NULL
Dr21049	GO:0004827|GO:0005524|GO:0005737|GO:0006433|GO:0016020|GO:0006525|GO:0006560	EC:6.1.1.15	protein	IPR004499|IPR002314|IPR004154|IPR016061|IPR017449|IPR002316|IPR006195	Proline-tRNA ligase, class IIa, archaeal-type|Aminoacyl-tRNA synthetase, class II (G/ H/ P/ S), conserved domain|Anticodon-binding|Proline-tRNA ligase, class II, C-terminal|Proline-tRNA ligase, class IIa|Prolyl-tRNA synthetase, class II|Aminoacyl-tRNA synthetase, class II	GO:0004827|GO:0005524|GO:0005737|GO:0006433|GO:0000166|GO:0004812|GO:0006418	EC:6.1.1.15	KEGG: 00970+6.1.1.15|Reactome: REACT_71
Dr21101	GO:0016023	NULL	calcineurin-like metallo-phosphoesterase-like protein	IPR018946	Alkaline phosphatase D-related	NULL	NULL	NULL
Dr21103	NULL	NULL	NULL	IPR027443	Isopenicillin N synthase-like	NULL	NULL	NULL
Dr21112	NULL	NULL	NULL	IPR008491	Protein of unknown function DUF773	NULL	NULL	NULL
Dr21091	GO:0009536	NULL	photosystem ii cp47 chlorophyll apoprotein	IPR001943	UVR domain	GO:0005515	NULL	NULL
Dr21110	GO:0016020	NULL	tim17 domain-containing protein	IPR003397	Mitochondrial inner membrane translocase subunit Tim17/Tim22/Tim23/peroxisomal protein PMP24	NULL	NULL	NULL
Dr21138	GO:0009536	NULL	calmodulin-binding protein	IPR012416	Calmodulin binding protein-like	NULL	NULL	NULL
Dr06784	GO:0015630|GO:0044763|GO:0044430	NULL	microtubule binding protein	NULL	NULL	NULL	NULL	NULL
Dr06789	GO:0042127|GO:0005886|GO:0009737|GO:0010187|GO:0031261|GO:0009651	NULL	arm repeat protein interacting with abf2-like	IPR000225|IPR013069|IPR016024|IPR011333|IPR011989|IPR000210	Armadillo|BTB/POZ|Armadillo-type fold|BTB/POZ fold|Armadillo-like helical|BTB/POZ-like	GO:0005515|GO:0005488	NULL	NULL
Dr06797	NULL	NULL	NULL	NULL	NULL	NULL	NULL	NULL
Dr06803	GO:0016023|GO:0005886	NULL	uncharacterized membrane	IPR003864|IPR027815	Domain of unknown function DUF221|Domain of unknown function DUF4463	GO:0016020	NULL	NULL
Dr06826	GO:0006432|GO:0005524|GO:0004826|GO:0000049|GO:0000162|GO:0006571|GO:0009094|GO:0009328	EC:6.1.1.20	phenylalanyl-trna synthetase alpha chain	IPR002319|IPR004529|IPR006195	Phenylalanyl-tRNA synthetase|Phenylalanyl-tRNA synthetase, class IIc, alpha subunit|Aminoacyl-tRNA synthetase, class II	GO:0000049|GO:0004812|GO:0005524|GO:0005737|GO:0043039|GO:0000166|GO:0004826|GO:0006432|GO:0006418	EC:6.1.1.20	KEGG: 00970+6.1.1.20|Reactome: REACT_71
Dr06837	GO:0071704|GO:0044238|GO:0009536|GO:0044699|GO:0044237	NULL	pale cress protein	NULL	NULL	NULL	NULL	NULL
Dr06838	GO:0003676|GO:0005739|GO:0005524|GO:0004815|GO:0009507|GO:0016020|GO:0006422|GO:0006522|GO:0006531	EC:6.1.1.12	aspartyl-trna synthetase	IPR018150|IPR004524|IPR004364|IPR004365|IPR004115|IPR012340|IPR002312|IPR006195	Aminoacyl-tRNA synthetase, class II (D/K/N)-like|Aspartate-tRNA ligase, class IIb, bacterial/mitochondrial-type|Aminoacyl-tRNA synthetase, class II (D/K/N)|OB-fold nucleic acid binding domain, AA-tRNA synthetase-type|GAD domain|Aspartyl/Asparaginyl-tRNA synthetase, class IIb|Nucleic acid-binding, OB-fold|Aminoacyl-tRNA synthetase, class II	GO:0000166|GO:0004812|GO:0005524|GO:0006418|GO:0016874|GO:0003676|GO:0005737	EC:6.1.1.12	Reactome: REACT_71|KEGG: 00970+6.1.1.12
Dr06861	GO:0016788|GO:0016023|GO:0006629	NULL	gdsl esterase lipase	IPR001087|IPR013831	Lipase, GDSL|SGNH hydrolase-type esterase domain	GO:0006629|GO:0016788|GO:0016787	NULL	NULL
Dr06863	GO:0008270|GO:0016881	EC:6.3.2.0	e3 ubiquitin ligase-like protein	IPR022170|IPR013083|IPR001841	Mitochondrial ubiquitin ligase activator of NFKB 1|Zinc finger, RING/FYVE/PHD-type|Zinc finger, RING-type	GO:0004842|GO:0007005|GO:0005515|GO:0008270	EC:6.3.2.-	KEGG: 00300+6.3.2.-|KEGG: 00380+6.3.2.-|UniPathway: UPA00143
Dr06869	NULL	NULL	NULL	NULL	NULL	NULL	NULL	NULL
Dr06849	GO:0016020	NULL	protein abci12	IPR003339	ABC/ECF transporter, transmembrane component	NULL	NULL	NULL
Dr06867	GO:0042254|GO:0030529	NULL	mo25-like protein	IPR013878|IPR016024|IPR011989	Mo25-like|Armadillo-type fold|Armadillo-like helical	GO:0005488	NULL	Reactome: REACT_11163|Reactome: REACT_498
Dr06874	NULL	NULL	NULL	NULL	NULL	NULL	NULL	NULL
Dr06880	GO:0005488|GO:0009536	NULL	at4g01940 t7b11_20	IPR001075	NIF system FeS cluster assembly, NifU, C-terminal	GO:0005506|GO:0016226|GO:0051536	NULL	NULL
Dr00187	GO:0044238|GO:0007049|GO:0044260|GO:0050794|GO:0005634	NULL	cyclin h-1	IPR015429|IPR027081|IPR013763	Cyclin C/H/T/L|CyclinH/Ccl1|Cyclin-like	GO:0000079|GO:0006355|GO:0019901|GO:0006351|GO:0016538|GO:0070985	NULL	NULL
Dr00188	GO:0010196|GO:0009507	NULL	protein	IPR007572	Uncharacterised protein family Ycf20	NULL	NULL	NULL
Dr00230	GO:0006432|GO:0005524|GO:0004826|GO:0000287|GO:0000049|GO:0000162|GO:0006571|GO:0009094|GO:0009328	EC:6.1.1.20	protein	IPR005146|IPR005147|IPR009061|IPR020825|IPR004531	B3/B4 tRNA-binding domain|tRNA synthetase, B5-domain|DNA binding domain, putative|Phenylalanyl-tRNA synthetase, B3/B4|Phenylalanyl-tRNA synthetase, class IIc, beta subunit, archae/euk cytosolic	GO:0003723|GO:0004826|GO:0000287|GO:0005524|GO:0006432|GO:0000166|GO:0005737	EC:6.1.1.20	KEGG: 00970+6.1.1.20
Dr00238	GO:0005507|GO:0048038|GO:0009507|GO:0009308	NULL	uncharacterized protein	IPR021602|IPR015801	Protein of unknown function DUF3223|Copper amine oxidase, N2/N3-terminal	GO:0005507|GO:0009308|GO:0048038	NULL	NULL
Dr00239	NULL	NULL	NULL	IPR003409	MORN motif	NULL	NULL	NULL
Dr00269	GO:0009536	NULL	uncharacterized protein	IPR010903	Protein of unknown function DUF1517	NULL	NULL	NULL
Dr00207	GO:0046872|GO:0006400|GO:0016740|GO:0051539|GO:0032440|GO:0005739|GO:0055114	EC:1.3.1.74	protein	IPR023970|IPR013848|IPR002792|IPR007197|IPR023404|IPR006638|IPR005839|IPR006463|IPR020612	Methylthiotransferase/radical SAM-type protein|Methylthiotransferase, N-terminal|TRAM domain|Radical SAM|Radical SAM, alpha/beta horseshoe|Elongator protein 3/MiaB/NifB|Methylthiotransferase|tRNA-i(6)A37 modification enzyme MiaB|Methylthiotransferase, conserved site	GO:0003824|GO:0009451|GO:0051539|GO:0051536|GO:0016740|GO:0043412|GO:0005737|GO:0006400	EC:2.-.-.-	KEGG: 00231+2.-.-.-
Dr21220	NULL	NULL	NULL	IPR000408|IPR009091	Regulator of chromosome condensation, RCC1|Regulator of chromosome condensation 1/beta-lactamase-inhibitor protein II	NULL	NULL	NULL
Dr21239	NULL	NULL	NULL	IPR006740	Protein of unknown function DUF604	NULL	NULL	NULL
Dr21217	NULL	NULL	NULL	NULL	NULL	NULL	NULL	NULL
Dr21246	GO:0005739|GO:0097159|GO:1901363	NULL	ribosomal protein s24e family protein	NULL	NULL	NULL	NULL	NULL
Dr21255	NULL	NULL	NULL	IPR018611	E3 UFM1-protein ligase 1	NULL	EC:6.3.2.-	KEGG: 00300+6.3.2.-|KEGG: 00380+6.3.2.-
Dr21292	NULL	NULL	NULL	IPR002885|IPR011990	Pentatricopeptide repeat|Tetratricopeptide-like helical	GO:0005515	NULL	NULL
Dr21316	NULL	NULL	NULL	IPR001646|IPR003131|IPR011333|IPR000210	Pentapeptide repeat|Potassium channel tetramerisation-type BTB domain|BTB/POZ fold|BTB/POZ-like	GO:0051260|GO:0005515	NULL	NULL
Dr21313	NULL	NULL	NULL	NULL	NULL	NULL	NULL	NULL
Dr21314	GO:0043231	NULL	exosome component 10-like	IPR002121|IPR002562|IPR010997|IPR012337	HRDC domain|3'-5' exonuclease domain|HRDC-like|Ribonuclease H-like domain	GO:0003676|GO:0005622|GO:0006139|GO:0008408|GO:0000166|GO:0003824|GO:0044237	NULL	NULL
Dr21315	NULL	NULL	NULL	IPR006927	Protein of unknown function DUF639	NULL	NULL	NULL
Dr21317	GO:0003725|GO:0008026|GO:0005524|GO:0016829|GO:0005739	NULL	probable atp-dependent rna helicase dhx36-like	IPR014720|IPR011545|IPR001650|IPR007502|IPR011709|IPR027417|IPR014001	Double-stranded RNA-binding domain|DNA/RNA helicase, DEAD/DEAH box type, N-terminal|Helicase, C-terminal|Helicase-associated domain|Domain of unknown function DUF1605|P-loop containing nucleoside triphosphate hydrolase|Helicase, superfamily 1/2, ATP-binding domain	GO:0003676|GO:0005524|GO:0008026|GO:0004386	NULL	NULL
Dr06910	GO:0003676|GO:0051026|GO:0008026|GO:0005524|GO:0007131	NULL	pentatricopeptide repeat-containing	IPR011545|IPR001650|IPR004179|IPR027417|IPR014001	DNA/RNA helicase, DEAD/DEAH box type, N-terminal|Helicase, C-terminal|Sec63 domain|P-loop containing nucleoside triphosphate hydrolase|Helicase, superfamily 1/2, ATP-binding domain	GO:0003676|GO:0005524|GO:0008026|GO:0004386	NULL	NULL
Dr06924	NULL	NULL	NULL	NULL	NULL	NULL	NULL	NULL
Dr06928	NULL	NULL	NULL	NULL	NULL	NULL	NULL	NULL
Dr06900	GO:0006629|GO:0016788	NULL	gdsl esterase lipase at5g62930-like	IPR001087|IPR026960|IPR013831	Lipase, GDSL|Reverse transcriptase zinc-binding domain|SGNH hydrolase-type esterase domain	GO:0006629|GO:0016788|GO:0016787	NULL	NULL
Dr06941	GO:0052689	EC:3.1.1.0	alpha beta fold family protein	IPR000073	Alpha/beta hydrolase fold-1	NULL	NULL	NULL
Dr06898	GO:0005576|GO:0004650|GO:0005739|GO:0005982|GO:0005985	EC:3.2.1.15	protein	IPR000743|IPR011050|IPR012334|IPR006626	Glycoside hydrolase, family 28|Pectin lyase fold/virulence factor|Pectin lyase fold|Parallel beta-helix repeat	GO:0004650|GO:0005975	NULL	NULL
Dr06905	GO:0051287|GO:0004450|GO:0000287|GO:0009507|GO:0006102|GO:0005739|GO:0006749|GO:0019643	EC:1.1.1.42	isocitrate dehydrogenase	IPR004790|IPR024084|IPR019818	Isocitrate dehydrogenase NADP-dependent|Isopropylmalate dehydrogenase-like domain|Isocitrate/isopropylmalate dehydrogenase, conserved site	GO:0004450|GO:0006102|GO:0055114|GO:0016616|GO:0000287|GO:0051287	EC:1.1.1.42	KEGG: 00020+1.1.1.42|KEGG: 00480+1.1.1.42|KEGG: 00720+1.1.1.42|MetaCyc: PWY-5913|MetaCyc: PWY-6549|MetaCyc: PWY-6728|MetaCyc: PWY-6969|MetaCyc: PWY-7124|MetaCyc: PWY-7254|MetaCyc: PWY-7268|Reactome: REACT_1046
Dr06984	GO:0008964|GO:0006094|GO:0019643	EC:4.1.1.31	phosphoenolpyruvate carboxylase	IPR021135|IPR015813|IPR018129|IPR022805	Phosphoenolpyruvate carboxylase|Pyruvate/Phosphoenolpyruvate kinase-like domain|Phosphoenolpyruvate carboxylase, active site|Phosphoenolpyruvate carboxylase, bacterial/plant-type	GO:0006099|GO:0008964|GO:0015977|GO:0003824	EC:4.1.1.31	KEGG: 00620+4.1.1.31|KEGG: 00680+4.1.1.31|KEGG: 00710+4.1.1.31|KEGG: 00720+4.1.1.31|MetaCyc: PWY-1622|MetaCyc: PWY-241|MetaCyc: PWY-5913|MetaCyc: PWY-6142|MetaCyc: PWY-6146|MetaCyc: PWY-6549|MetaCyc: PWY-7115|MetaCyc: PWY-7117|MetaCyc: PWY-7124
Dr06987	GO:0016023|GO:0005886|GO:0006950|GO:0005524|GO:0032440|GO:0009507|GO:0055114	EC:1.3.1.74	hypoxia up-regulated protein 1-like	IPR013126|IPR018181	Heat shock protein 70 family|Heat shock protein 70, conserved site	NULL	NULL	NULL
Dr06990	GO:0016310|GO:0043167|GO:0004672|GO:0022402|GO:0000166	NULL	wee1-like protein kinase	IPR000719|IPR011009|IPR002290|IPR017441|IPR008271	Protein kinase domain|Protein kinase-like domain|Serine/threonine- / dual specificity protein kinase, catalytic domain|Protein kinase, ATP binding site|Serine/threonine-protein kinase, active site	GO:0004672|GO:0005524|GO:0006468|GO:0016772|GO:0004674	NULL	NULL
Dr06993	GO:0043231|GO:0044763	NULL	cell cycle checkpoint control-like protein	IPR026584|IPR007268	Rad9|Rad9/Ddc1	GO:0000075|GO:0000077|GO:0006281|GO:0030896	NULL	Reactome: REACT_1538
Dr07003	NULL	NULL	NULL	IPR003347|IPR014977|IPR001841	JmjC domain|WRC|Zinc finger, RING-type	GO:0005515|GO:0008270	NULL	NULL
Dr07005	GO:0009654|GO:0005509|GO:0015979|GO:0019898	NULL	#NAME?	IPR002683|IPR016123	Photosystem II PsbP, oxygen evolving complex|Mog1/PsbP, alpha/beta/alpha sandwich	GO:0005509|GO:0009523|GO:0009654|GO:0015979|GO:0019898	NULL	NULL
Dr07078	GO:0009536	NULL	at4g15540 dl3810w	NULL	NULL	NULL	NULL	NULL
Dr07086	GO:0016491|GO:0004871|GO:0000160|GO:0009736|GO:0044424	NULL	histidine phosphotransfer protein	IPR008207	Signal transduction histidine kinase, phosphotransfer (Hpt) domain	GO:0000160|GO:0004871	NULL	NULL
Dr07014	GO:0005525|GO:0006184|GO:0009706|GO:0009570|GO:0009790|GO:0000287|GO:0009416|GO:0003924|GO:0010027	NULL	gtp1 obg family protein	IPR014100|IPR006169|IPR006073|IPR015349|IPR027417|IPR006074	GTP-binding protein Obg/CgtA|GTP1/OBG domain|GTP binding domain|GTP-binding protein GTP1/OBG, C-terminal|P-loop containing nucleoside triphosphate hydrolase|GTP1/OBG, conserved site	GO:0000287|GO:0003924|GO:0005525|GO:0000166	NULL	NULL
Dr07034	NULL	NULL	NULL	IPR001810	F-box domain	GO:0005515	NULL	NULL
Dr07041	NULL	NULL	NULL	IPR001810|IPR000007|IPR025659|IPR018066	F-box domain|Tubby, C-terminal|Tubby C-terminal-like domain|Tubby, C-terminal, conserved site	GO:0005515	NULL	NULL
Dr07043	GO:0008017|GO:0006468|GO:0004674|GO:0005524|GO:0000914|GO:0010342|GO:0045298|GO:0009069	EC:2.7.11.0	serine threonine-protein kinase ulk4-like	IPR000719|IPR016024|IPR011009|IPR011989|IPR002290|IPR017441|IPR008271	Protein kinase domain|Armadillo-type fold|Protein kinase-like domain|Armadillo-like helical|Serine/threonine- / dual specificity protein kinase, catalytic domain|Protein kinase, ATP binding site|Serine/threonine-protein kinase, active site	GO:0004672|GO:0005524|GO:0006468|GO:0005488|GO:0016772|GO:0004674	NULL	NULL
Dr06925	GO:0008152|GO:0016757	NULL	anthranilate phosphoribosyltransferase	IPR017459|IPR000312	Glycosyl transferase family 3, N-terminal domain|Glycosyl transferase, family 3	GO:0008152|GO:0016757	NULL	NULL
Dr06930	GO:0005488	NULL	nad-dependent epimerase dehydratase	IPR016040	NAD(P)-binding domain	NULL	NULL	NULL
Dr06943	GO:0015937|GO:0005524|GO:0016310|GO:0004594|GO:0015940	EC:2.7.1.33	pantothenate kinase 2	IPR002791|IPR004567|IPR015844	Domain of unknown function DUF89|Type II pantothenate kinase|Pantothenate kinase, acetyl-CoA regulated, two-domain type	GO:0004594|GO:0005524|GO:0015937	EC:2.7.1.33	KEGG: 00770+2.7.1.33|MetaCyc: PWY-3961|Reactome: REACT_11193|UniPathway: UPA00241|KEGG: 00770+2.7.1.33|MetaCyc: PWY-3961|UniPathway: UPA00241
Dr06945	GO:0006281|GO:0090399|GO:0004674|GO:0010212|GO:0016572|GO:0000723|GO:0005524|GO:0000077|GO:0009069	EC:2.7.11.0	ataxia telangiectasia	IPR015519|IPR000403|IPR003151|IPR003152|IPR016024|IPR011009|IPR014009|IPR018936	ATM/Tel1|Phosphatidylinositol 3-/4-kinase, catalytic domain|PIK-related kinase, FAT|PIK-related kinase, FATC|Armadillo-type fold|Protein kinase-like domain|PIK-related kinase|Phosphatidylinositol 3/4-kinase, conserved site	GO:0000077|GO:0000723|GO:0004674|GO:0006281|GO:0006974|GO:0010212|GO:0016572|GO:0090399|GO:0016773|GO:0005515|GO:0005488|GO:0016772	NULL	NULL
Dr06913	GO:0004673|GO:0009401|GO:0005739|GO:0046872|GO:0009610|GO:0009941|GO:0005983|GO:0005524|GO:0050521|GO:0009631|GO:0016310|GO:0009570|GO:0005351|GO:0009365	EC:2.7.13.3|EC:2.7.9.4	alpha-glucan water chloroplastic-like	IPR002192|IPR013815|IPR013816	Pyruvate phosphate dikinase, PEP/pyruvate-binding|ATP-grasp fold, subdomain 1|ATP-grasp fold, subdomain 2	GO:0005524|GO:0016301|GO:0016310|GO:0003824	NULL	NULL
Dr06983	GO:0016020|GO:0044464|GO:0008233	NULL	calpain-type cysteine protease	IPR001300|IPR022682|IPR008985|IPR013320|IPR022684|IPR000169	Peptidase C2, calpain, catalytic domain|Peptidase C2, calpain, large subunit, domain III|Peptidase C2, calpain family|Concanavalin A-like lectin/glucanases superfamily|Concanavalin A-like lectin/glucanase, subgroup|Cysteine peptidase, cysteine active site	GO:0004198|GO:0005622|GO:0006508	NULL	NULL
Dr21327	NULL	NULL	NULL	IPR024326	Ribosomal RNA-processing protein 7	NULL	NULL	NULL
Dr21520	GO:0005739|GO:0009536	NULL	suppressor-like protein	IPR010770	SGT1	NULL	NULL	NULL
Dr21521	NULL	NULL	NULL	IPR013536|IPR001876	WLM|Zinc finger, RanBP2-type	GO:0008270	NULL	NULL
Dr21510	GO:0005739|GO:0009536	NULL	pentatricopeptide repeat-containing protein	IPR000644|IPR002885|IPR013785	CBS domain|Pentatricopeptide repeat|Aldolase-type TIM barrel	GO:0030554|GO:0003824	NULL	NULL
Dr07093	GO:0045226|GO:0016853|GO:0000166|GO:0055114|GO:0008831|GO:0009225|GO:0019872|GO:0030639	EC:1.1.1.133	rossmann-fold nad -binding domain-containing protein	IPR005913|IPR016040	dTDP-4-dehydrorhamnose reductase|NAD(P)-binding domain	GO:0008831|GO:0045226	NULL	NULL
Dr07096	GO:0003723|GO:0009507	NULL	s1 rna-binding domain-containing protein	IPR003029|IPR012340|IPR022967	Ribosomal protein S1, RNA-binding domain|Nucleic acid-binding, OB-fold|RNA-binding domain, S1	GO:0003723	NULL	NULL
Dr07102	GO:0006810|GO:0016020|GO:0000166|GO:0043231|GO:0030983|GO:0044446|GO:0006298	NULL	dna mismatch repair protein	IPR000432|IPR007695|IPR007860|IPR007861|IPR007696|IPR027417|IPR016151	DNA mismatch repair protein MutS, C-terminal|DNA mismatch repair protein MutS-like, N-terminal|DNA mismatch repair protein MutS, connector domain|DNA mismatch repair protein MutS, clamp|DNA mismatch repair protein MutS, core|P-loop containing nucleoside triphosphate hydrolase|DNA mismatch repair protein MutS, N-terminal	GO:0005524|GO:0006298|GO:0030983	NULL	NULL
Dr07094	GO:0004672|GO:0016310	NULL	protein kinase family protein	IPR000719|IPR011009|IPR002290|IPR017441	Protein kinase domain|Protein kinase-like domain|Serine/threonine- / dual specificity protein kinase, catalytic domain|Protein kinase, ATP binding site	GO:0004672|GO:0005524|GO:0006468|GO:0016772	NULL	NULL
Dr21688	GO:0030036|GO:0000055|GO:0042273	NULL	sda1 family protein	IPR027312|IPR007949|IPR012977|IPR016024	Sda1|SDA1 domain|Uncharacterised domain NUC130/133, N-terminal|Armadillo-type fold	GO:0000055|GO:0030036|GO:0042273|GO:0005488	NULL	NULL
Dr21690	GO:0009790|GO:0051301|GO:0000166|GO:0005874	NULL	gpn-loop gtpase	IPR004130|IPR027417	Uncharacterised protein family, ATP binding|P-loop containing nucleoside triphosphate hydrolase	GO:0000166	NULL	NULL
Dr21645	GO:0005886|GO:0048278|GO:0006887|GO:0000145|GO:0015031	NULL	exocyst complex component 5	IPR009976	Exocyst complex component Sec10-like	GO:0005737|GO:0006887|GO:0048278	NULL	NULL
Dr21673	GO:0044424	NULL	duf246 domain-containing protein at1g04910-like	IPR019378|IPR024709	GDP-fucose protein O-fucosyltransferase|O-fucosyltransferase, plant	NULL	EC:2.4.1.221	KEGG: 00514+2.4.1.221|UniPathway: UPA00378
Dr21657	GO:0007094|GO:0051301|GO:0000776|GO:0010369|GO:0005634	NULL	mitotic spindle checkpoint protein mad2	IPR027097|IPR003511	Mitotic spindle checkpoint protein Mad2|DNA-binding HORMA	GO:0007094	NULL	NULL
Dr21675	GO:0055114|GO:0003863|GO:0006550|GO:0006552|GO:0006574|GO:0017086	EC:1.2.4.4	2-oxoisovalerate dehydrogenase e1 alpha subunit	IPR001017	Dehydrogenase, E1 component	GO:0008152|GO:0016624	NULL	NULL
Dr07116	GO:0005524|GO:0004386|GO:0003677|GO:0008270	NULL	f-box protein at3g54460-like	IPR000330|IPR001650|IPR011124|IPR027417|IPR001810|IPR014001|IPR017907	SNF2-related|Helicase, C-terminal|Zinc finger, CW-type|P-loop containing nucleoside triphosphate hydrolase|F-box domain|Helicase, superfamily 1/2, ATP-binding domain|Zinc finger, RING-type, conserved site	GO:0003677|GO:0005524|GO:0003676|GO:0004386|GO:0008270|GO:0005515	NULL	NULL
Dr07119	GO:0006950|GO:0009628|GO:0005488	NULL	annexin d4-like	IPR009118|IPR018502|IPR001464	Annexin, plant|Annexin repeat|Annexin	GO:0005509|GO:0005544	NULL	NULL
Dr07160	GO:0009543|GO:0019898|GO:0005509|GO:0009570|GO:0015979|GO:0009654	NULL	psbp domain-containing protein chloroplastic-like	IPR002683|IPR016123	Photosystem II PsbP, oxygen evolving complex|Mog1/PsbP, alpha/beta/alpha sandwich	GO:0005509|GO:0009523|GO:0009654|GO:0015979|GO:0019898	NULL	NULL
Dr07169	GO:0030272|GO:0009396|GO:0005524|GO:0009507	EC:6.3.3.2	methenyltetrahydrofolate synthase domain-containing	IPR002698|IPR024185	5-formyltetrahydrofolate cyclo-ligase|5-formyltetrahydrofolate cyclo-ligase-like domain	GO:0005524|GO:0009396|GO:0030272	NULL	NULL
Dr07172	GO:0008168|GO:0016571	EC:2.1.1.0	histone-lysine n-methyltransferase ashh1-like	IPR001214|IPR003616|IPR006560	SET domain|Post-SET domain|AWS	GO:0005515|GO:0005634|GO:0018024	EC:2.1.1.43	KEGG: 00310+2.1.1.43
Dr07186	GO:0016020	NULL	transmembrane protein 184c-like	IPR005178	Organic solute transporter Ost-alpha	NULL	NULL	NULL
Dr07192	NULL	NULL	NULL	IPR019337	Telomere length regulation protein, conserved domain	NULL	NULL	NULL
Dr07200	GO:0003887|GO:0006260|GO:0003677|GO:0005739|GO:0042575	EC:2.7.7.7	dna polymerase alpha subunit b	IPR007185|IPR013627|IPR016722	DNA polymerase alpha/epsilon, subunit B|DNA polymerase alpha, subunit B N-terminal|DNA polymerase alpha, subunit B	GO:0003677|GO:0003887|GO:0006260	NULL	Reactome: REACT_152|Reactome: REACT_22172|Reactome: REACT_383
Dr07204	GO:0004386|GO:1901363|GO:0097159|GO:0009536	NULL	atp-dependent dna helicase q-like 5-like	IPR011545|IPR001650|IPR003832|IPR027417|IPR014001|IPR004589	DNA/RNA helicase, DEAD/DEAH box type, N-terminal|Helicase, C-terminal|Acid phosphatase/vanadium-dependent haloperoxidase-related|P-loop containing nucleoside triphosphate hydrolase|Helicase, superfamily 1/2, ATP-binding domain|DNA helicase, ATP-dependent, RecQ type	GO:0003676|GO:0005524|GO:0008026|GO:0004386|GO:0006310	NULL	NULL
Dr07205	GO:0009061|GO:0016023|GO:0005794	NULL	kelch motif family protein	IPR006652|IPR015915	Kelch repeat type 1|Kelch-type beta propeller	GO:0005515	NULL	NULL
Dr07228	GO:0009507	NULL	pre-mrna-splicing factor isy1	IPR009360	Isy1-like splicing	NULL	NULL	NULL
Dr07230	GO:0009536	NULL	structural molecule	IPR006843	Plastid lipid-associated protein/fibrillin conserved domain	GO:0005198|GO:0009507	NULL	NULL
Dr07240	GO:0006355	NULL	scarecrow-like protein 1-like	IPR005202	Transcription factor GRAS	NULL	NULL	NULL
Dr07159	GO:0009409|GO:0006417|GO:0005634|GO:0009408|GO:0005739	NULL	f-box protein 7-like	IPR001810	F-box domain	GO:0005515	NULL	NULL
Dr07163	NULL	NULL	NULL	IPR001214	SET domain	GO:0005515	NULL	NULL
Dr07184	GO:0009536	NULL	uncharacterized protein	IPR003728	Ribosome maturation factor RimP	NULL	NULL	NULL
Dr07191	GO:0005739	NULL	pentatricopeptide repeat-containing protein	IPR002885|IPR011990	Pentatricopeptide repeat|Tetratricopeptide-like helical	GO:0005515	NULL	NULL
Dr07193	NULL	NULL	NULL	IPR028163	HAUS augmin-like complex subunit 6, N-terminal	NULL	NULL	NULL
Dr07235	GO:0005739	NULL	protein	NULL	NULL	NULL	NULL	NULL
Dr07241	NULL	NULL	NULL	IPR019379	Gamma-secretase aspartyl protease complex, presenilin enhancer-2 subunit	NULL	NULL	NULL
Dr07248	NULL	NULL	NULL	IPR002912	ACT domain	GO:0008152|GO:0016597	NULL	NULL
Dr07249	GO:0016787|GO:0009507	NULL	histone deacetylase	IPR000286|IPR023801	Histone deacetylase superfamily|Histone deacetylase domain	NULL	NULL	NULL
Dr07260	GO:0051082|GO:0031072|GO:0009536	NULL	chaperone protein dnaj-related-like	IPR001305	Heat shock protein DnaJ, cysteine-rich domain	GO:0031072|GO:0051082	NULL	NULL
Dr07358	GO:0006468|GO:0004674|GO:0005524|GO:0000165|GO:0009069	EC:2.7.11.0	protein kinase domain-containing protein	IPR002100|IPR002487|IPR001245|IPR011009|IPR002290|IPR000719|IPR008271	Transcription factor, MADS-box|Transcription factor, K-box|Serine-threonine/tyrosine-protein kinase catalytic domain|Protein kinase-like domain|Serine/threonine- / dual specificity protein kinase, catalytic domain|Protein kinase domain|Serine/threonine-protein kinase, active site	GO:0003677|GO:0046983|GO:0003700|GO:0005634|GO:0006355|GO:0004672|GO:0006468|GO:0016772|GO:0005524|GO:0004674	NULL	Reactome: REACT_21303
Dr07370	GO:0003700|GO:0043565|GO:0006355|GO:0005667|GO:0045449	NULL	dentin sialophospho protein	NULL	NULL	NULL	NULL	NULL
Dr07295	NULL	NULL	NULL	IPR016181	Acyl-CoA N-acyltransferase	NULL	NULL	NULL
Dr07311	NULL	NULL	NULL	NULL	NULL	NULL	NULL	NULL
Dr07333	GO:0009536	NULL	ubx domain-containing protein 6-like	IPR001012|IPR018997|IPR006567|IPR006642	UBX|PUB domain|PUG domain|Zinc finger, Rad18-type putative	GO:0005515|GO:0003677|GO:0006281	NULL	NULL
Dr07346	GO:0050789|GO:0003677|GO:0006351	NULL	transcription factor hbp-1b	IPR004827|IPR025422	Basic-leucine zipper domain|Transcription factor TGA like domain	GO:0003700|GO:0006355|GO:0043565|GO:0006351	NULL	NULL
Dr07364	GO:0004849|GO:0016773|GO:0005524|GO:0006222|GO:0016310|GO:0006206	EC:2.7.1.48|EC:2.7.1.0	p-loop containing nucleoside triphosphate hydrolase-like protein	IPR026008|IPR006083|IPR027417|IPR023577|IPR000764|IPR003593	Uridine kinase-like protein|Phosphoribulokinase/uridine kinase|Uridine kinase|P-loop containing nucleoside triphosphate hydrolase|CYTH-like domain|AAA+ ATPase domain	GO:0005524|GO:0008152|GO:0016301|GO:0004849|GO:0016773|GO:0000166|GO:0017111	EC:2.7.1.48	KEGG: 00240+2.7.1.48|KEGG: 00983+2.7.1.48|MetaCyc: PWY-7193|UniPathway: UPA00574|UniPathway: UPA00579
Dr07365	GO:0005739|GO:0009536	NULL	nadh dehydrogenase subunit	IPR019654	NAD(P)H-quinone oxidoreductase subunit L	GO:0016655|GO:0055114	EC:1.6.5.-	KEGG: 00624+1.6.5.-
Dr07281	GO:0017111|GO:0031348|GO:0003887|GO:0006260|GO:0003677|GO:0005524|GO:0005663|GO:0042575	EC:3.6.1.15|EC:2.7.7.7	dna replication factor c complex subunit 5	IPR003959|IPR013748|IPR008921|IPR027417|IPR003593	ATPase, AAA-type, core|Replication factor C, C-terminal domain|DNA polymerase III, clamp loader complex, gamma/delta/delta subunit, C-terminal|P-loop containing nucleoside triphosphate hydrolase|AAA+ ATPase domain	GO:0005524|GO:0003677|GO:0006260|GO:0000166|GO:0017111	NULL	Reactome: REACT_152|Reactome: REACT_1538|Reactome: REACT_216|Reactome: REACT_22172|Reactome: REACT_383
Dr07282	GO:0031072|GO:0051082|GO:0009561|GO:0009535	NULL	protein	IPR001305	Heat shock protein DnaJ, cysteine-rich domain	GO:0031072|GO:0051082	NULL	NULL
Dr07283	GO:0015937|GO:0005524|GO:0004594|GO:0015940	EC:2.7.1.33	pantothenate kinase 2-like	IPR004567	Type II pantothenate kinase	GO:0004594|GO:0005524|GO:0015937	EC:2.7.1.33	KEGG: 00770+2.7.1.33|MetaCyc: PWY-3961|Reactome: REACT_11193|UniPathway: UPA00241
Dr07302	NULL	NULL	NULL	IPR013176	Protein of unknown function DUF1712, fungi	NULL	NULL	NULL
Dr07304	GO:0016023	NULL	nicastrin	IPR008710	Nicastrin	GO:0016021|GO:0016485	NULL	NULL
Dr07310	GO:0006355|GO:0018298|GO:0009911|GO:0048511|GO:0009637|GO:0016567|GO:0007165|GO:0009881|GO:0005634	NULL	circadian clock-associated fkf1	IPR000014|IPR011043|IPR001810|IPR015915	PAS domain|Galactose oxidase/kelch, beta-propeller|F-box domain|Kelch-type beta propeller	GO:0004871|GO:0007165|GO:0005515	NULL	NULL
Dr07314	GO:0043231|GO:0006281|GO:0003677	NULL	xeroderma pigmentosum group c-complementing protein	IPR004583|IPR002931|IPR018325|IPR018326|IPR018327|IPR018328	DNA repair protein Rad4|Transglutaminase-like|Rad4/PNGase transglutaminase-like fold|Rad4 beta-hairpin domain 1|Rad4 beta-hairpin domain 2|Rad4 beta-hairpin domain 3	GO:0003684|GO:0005634|GO:0006289|GO:0003677	NULL	NULL
Dr07335	GO:0008442|GO:0008270|GO:0016832|GO:0006098|GO:0000166|GO:0004616|GO:0050662|GO:0005634|GO:0006550|GO:0006552|GO:0006574|GO:0019521	EC:1.1.1.31|EC:4.1.2.0|EC:1.1.1.44	ketose-bisphosphate aldolase class-ii-like protein	IPR015815|IPR000771|IPR006115|IPR010737|IPR008927|IPR013328|IPR013785|IPR016040|IPR002204	Hydroxy monocarboxylic acid anion dehydrogenase, HIBADH-type|Ketose-bisphosphate aldolase, class-II|6-phosphogluconate dehydrogenase, NADP-binding|Protein of unknown function, DUF1537|6-phosphogluconate dehydrogenase, C-terminal-like|Dehydrogenase, multihelical|Aldolase-type TIM barrel|NAD(P)-binding domain|3-hydroxyisobutyrate dehydrogenase-related, conserved site	GO:0016491|GO:0055114|GO:0005975|GO:0008270|GO:0016832|GO:0004616|GO:0006098|GO:0016616|GO:0050662|GO:0003824|GO:0006573|GO:0008442	NULL	NULL
Dr07344	GO:0009536	NULL	uncharacterized protein	IPR027973	Protein of unknown function DUF4602	NULL	NULL	NULL
Dr21893	GO:0006412|GO:0032259|GO:0008168	EC:2.1.1.0	cytochrome c oxidase assembly protein	IPR007533|IPR015324	Cytochrome c oxidase assembly protein CtaG/Cox11|Ribosomal protein Rsm22, bacterial-type	GO:0005507|GO:0006412|GO:0008168	EC:2.1.1.-	KEGG: 00130+2.1.1.-|KEGG: 00253+2.1.1.-|KEGG: 00270+2.1.1.-|KEGG: 00340+2.1.1.-|KEGG: 00350+2.1.1.-|KEGG: 00360+2.1.1.-|KEGG: 00380+2.1.1.-|KEGG: 00450+2.1.1.-|KEGG: 00522+2.1.1.-|KEGG: 00624+2.1.1.-|KEGG: 00627+2.1.1.-|KEGG: 00860+2.1.1.-|KEGG: 00940+2.1.1.-|KEGG: 00941+2.1.1.-|KEGG: 00942+2.1.1.-|KEGG: 00945+2.1.1.-|KEGG: 00950+2.1.1.-|KEGG: 00981+2.1.1.-
Dr21901	GO:0000775|GO:0005634|GO:0051301|GO:0007059	NULL	centromere protein o	IPR010903|IPR018464	Protein of unknown function DUF1517|Centromere protein O	GO:0000776|GO:0034508	NULL	NULL
Dr21903	GO:0009536	NULL	ribulose bisphosphate carboxylase oxygenase chloroplastic-like	IPR003959|IPR027417	ATPase, AAA-type, core|P-loop containing nucleoside triphosphate hydrolase	GO:0005524	NULL	NULL
Dr21900	GO:0005506|GO:0016226|GO:0051536|GO:0009507	NULL	#NAME?	IPR001075	NIF system FeS cluster assembly, NifU, C-terminal	GO:0005506|GO:0016226|GO:0051536	NULL	NULL
Dr21952	GO:0043229	NULL	uncharacterized protein	IPR018786	Protein of unknown function DUF2343	NULL	NULL	NULL
Dr21997	GO:0009987	NULL	smr (small related) domain-containing protein	IPR002625|IPR013899	Smr protein/MutS2 C-terminal|Domain of unknown function DUF1771	NULL	NULL	NULL
Dr21998	GO:0004316|GO:0006760|GO:0055114|GO:0000166|GO:0005835|GO:0006633|GO:0042967	EC:1.1.1.100	rossmann-fold nad -binding domain-containing protein	IPR002198|IPR016040|IPR002347|IPR020904	Short-chain dehydrogenase/reductase SDR|Glucose/ribitol dehydrogenase|NAD(P)-binding domain|Short-chain dehydrogenase/reductase, conserved site	GO:0008152|GO:0016491	NULL	NULL
Dr22001	GO:0006071|GO:0008889|GO:0009395|GO:0046486	EC:3.1.4.46	glycerophosphoryl diester	IPR004129|IPR017946	Glycerophosphoryl diester phosphodiesterase|PLC-like phosphodiesterase, TIM beta/alpha-barrel domain	GO:0006071|GO:0008889|GO:0006629|GO:0008081	NULL	NULL
Dr07396	GO:0010026|GO:0009741|GO:0042802|GO:0005524|GO:0003918|GO:0042023|GO:0005694|GO:0006265|GO:0007389	EC:5.99.1.3	dna topoisomerase 6 subunit b	IPR003594|IPR015320|IPR020568|IPR014721|IPR005734	Histidine kinase-like ATPase, ATP-binding domain|DNA topoisomerase VI, subunit B, transducer|Ribosomal protein S5 domain 2-type fold|Ribosomal protein S5 domain 2-type fold, subgroup|DNA topoisomerase VI, subunit B	GO:0005524|GO:0003677|GO:0003918|GO:0005694|GO:0006265	NULL	NULL
Dr07398	NULL	NULL	NULL	IPR000683|IPR004104|IPR016040	Oxidoreductase, N-terminal|Oxidoreductase, C-terminal|NAD(P)-binding domain	GO:0016491|GO:0008152|GO:0055114	NULL	NULL
Dr07404	GO:0030001|GO:0016020|GO:0046873|GO:0055085	NULL	zinc transporter ztp29-like	IPR003689	Zinc/iron permease	GO:0016020|GO:0030001|GO:0046873|GO:0055085	NULL	NULL
Dr07420	GO:0005730|GO:0005524|GO:0005739	NULL	actin-6	IPR004000|IPR001810	Actin-related protein|F-box domain	GO:0005515	NULL	NULL
Dr07438	GO:0005739	NULL	regulatory protein family protein	IPR003783	Regulatory protein RecX	GO:0006282	NULL	NULL
Dr07439	GO:0009793|GO:0016607|GO:0003746|GO:0045694|GO:0005525|GO:0005618|GO:0006184|GO:0005730|GO:0003924|GO:0005886|GO:0005840|GO:0006448	NULL	u5 small nuclear ribonucleoprotein component	IPR000795|IPR000640|IPR004161|IPR005517|IPR009000|IPR027417|IPR020568|IPR009022|IPR014721|IPR005225	Elongation factor, GTP-binding domain|Translation elongation factor EFG, V domain|Translation elongation factor EFTu/EF1A, domain 2|Translation elongation factor EFG/EF2, domain IV|Translation protein, beta-barrel domain|P-loop containing nucleoside triphosphate hydrolase|Ribosomal protein S5 domain 2-type fold|Elongation factor G, III-V domain|Ribosomal protein S5 domain 2-type fold, subgroup|Sm…	GO:0003924|GO:0005525	NULL	NULL
Dr07444	GO:0005488	NULL	rna polymerase subunit	IPR011262|IPR009025|IPR011263	DNA-directed RNA polymerase, insert domain|DNA-directed RNA polymerase, RBP11-like dimerisation domain|DNA-directed RNA polymerase, RpoA/D/Rpb3-type	GO:0003899|GO:0006351|GO:0046983	EC:2.7.7.6	KEGG: 00230+2.7.7.6|KEGG: 00240+2.7.7.6|Reactome: REACT_1788|KEGG: 00230+2.7.7.6|KEGG: 00240+2.7.7.6
Dr07392	NULL	NULL	NULL	IPR000467|IPR025239	G-patch domain|Domain of unknown function DUF4187	GO:0003676	NULL	NULL
Dr07402	NULL	NULL	NULL	IPR013882	DNA repair protein Sae2/CtIP	NULL	NULL	NULL
Dr07407	GO:0055085|GO:0006811|GO:0016020|GO:0005215	NULL	tonoplast dicarboxylate	IPR001898	Sodium/sulphate symporter	GO:0005215|GO:0006814|GO:0016020|GO:0055085	NULL	Reactome: REACT_15518|Reactome: REACT_20633
Dr07411	GO:0009941|GO:0000304|GO:0009535|GO:0010380|GO:0031408	NULL	flourescent in blue light protein	IPR013105|IPR011990|IPR019734|IPR013026	Tetratricopeptide TPR2|Tetratricopeptide-like helical|Tetratricopeptide repeat|Tetratricopeptide repeat-containing domain	GO:0005515	NULL	NULL
Dr07412	GO:0006633|GO:0004315|GO:0005739|GO:0005835|GO:0042967	EC:2.3.1.41	3-oxoacyl-	IPR014030|IPR014031|IPR016039|IPR016038|IPR020841|IPR017568|IPR018201	Beta-ketoacyl synthase, N-terminal|Beta-ketoacyl synthase, C-terminal|Thiolase-like|Thiolase-like, subgroup|Polyketide synthase, beta-ketoacyl synthase domain|3-oxoacyl-[acyl-carrier-protein] synthase 2|Beta-ketoacyl synthase, active site	GO:0003824|GO:0008152|GO:0006633|GO:0016747	NULL	UniPathway: UPA00094
Dr07414	GO:0005545|GO:0030118|GO:0030276|GO:0048268	NULL	protein	IPR027417	P-loop containing nucleoside triphosphate hydrolase	NULL	NULL	NULL
Dr07429	NULL	NULL	NULL	NULL	NULL	NULL	NULL	NULL
Dr07442	GO:0016023|GO:0009987|GO:0016020|GO:0005783	NULL	gpi inositol-deacylase	IPR009719|IPR012908|IPR009060	Protein of unknown function DUF1296, plant|GPI inositol-deacylase PGAP1-like|UBA-like	GO:0006505|GO:0006886|GO:0016788|GO:0005515	NULL	NULL
Dr07466	GO:0008026|GO:0003723|GO:0005524|GO:0005634	NULL	dead-box atp-dependent rna helicase 29-like	IPR011545|IPR001650|IPR012541|IPR027417|IPR014001|IPR014014	DNA/RNA helicase, DEAD/DEAH box type, N-terminal|Helicase, C-terminal|DBP10CT|P-loop containing nucleoside triphosphate hydrolase|Helicase, superfamily 1/2, ATP-binding domain|RNA helicase, DEAD-box type, Q motif	GO:0003676|GO:0005524|GO:0008026|GO:0004386|GO:0003723|GO:0005634|GO:0016818	NULL	NULL
Dr07496	NULL	NULL	NULL	NULL	NULL	NULL	NULL	NULL
Dr07499	GO:0008967|GO:0046487	EC:3.1.3.18	haloacid dehalogenase-like hydrolase domain-containing protein	IPR023214|IPR006439|IPR011949	HAD-like domain|HAD hydrolase, subfamily IA|HAD-superfamily hydrolase, subfamily IA, REG-2-like	GO:0008152|GO:0016787	NULL	NULL
Dr07500	GO:0005739|GO:0070681|GO:0032543|GO:0050567|GO:0005524|GO:0016740|GO:0009570|GO:0030956|GO:0006536	EC:6.3.5.7	glutamyl-trna amidotransferase subunit a	IPR000120|IPR023631|IPR004412|IPR020556	Amidase|Amidase signature domain|Glutamyl-tRNA(Gln) amidotransferase A subunit|Amidase, conserved site	GO:0016884|GO:0006412	EC:6.3.5.-	KEGG: 00253+6.3.5.-
Dr07468	NULL	NULL	NULL	IPR013886|IPR021625	PI31 proteasome regulator|Fbxo7/PI31 domain	NULL	NULL	NULL
Dr07469	GO:0016023	NULL	wd repeat and hmg-box dna-binding protein 1-like	IPR001680|IPR022100|IPR017986|IPR015943|IPR019775	WD40 repeat|Protein of unknown function DUF3639|WD40-repeat-containing domain|WD40/YVTN repeat-like-containing domain|WD40 repeat, conserved site	GO:0005515	NULL	NULL
Dr07479	GO:0005739|GO:0009536	NULL	ectonucleoside triphosphate diphosphohydrolase 1-like isoform 1	IPR000407	Nucleoside phosphatase GDA1/CD39	GO:0016787	NULL	NULL
Dr07483	GO:0009505|GO:0006979|GO:0003840|GO:0016756|GO:0006751|GO:0048046|GO:0005739|GO:0006691|GO:0006693|GO:0019530	EC:2.3.2.2|EC:2.3.2.15	gamma-glutamyl transpeptidase 1	IPR000101	Gamma-glutamyltranspeptidase	GO:0003840|GO:0006749	EC:2.3.2.2	KEGG: 00430+2.3.2.2|KEGG: 00460+2.3.2.2|KEGG: 00480+2.3.2.2|KEGG: 00590+2.3.2.2|MetaCyc: PWY-4041|MetaCyc: PWY-5826
Dr07486	GO:0050896|GO:0006810|GO:0044763|GO:0005635|GO:0016020	NULL	nuclear pore complex protein nup98-nup96	IPR007230|IPR021967	Peptidase S59, nucleoporin|Nuclear protein 96	GO:0005643|GO:0006810	NULL	NULL
Dr07518	GO:0044710|GO:0044238|GO:0071704|GO:0008081	EC:3.1.4.0	melanoma-associated antigen	IPR002190	MAGE protein	NULL	NULL	NULL
Dr07547	GO:0055085|GO:0000302|GO:0010351|GO:0015299|GO:0044464|GO:0016020|GO:0006885	NULL	na+ h+ antiporter	IPR018422|IPR018418|IPR000595|IPR006153|IPR018490|IPR014710	Cation/H+ exchanger, CPA1 family|Na+/H+ exchanger, isoforms 7/8|Cyclic nucleotide-binding domain|Cation/H+ exchanger|Cyclic nucleotide-binding-like|RmlC-like jelly roll fold	GO:0006812|GO:0015299|GO:0016021|GO:0055085	NULL	Reactome: REACT_15518
Dr07558	NULL	NULL	NULL	IPR009755	Colon cancer-associated Mic1-like	NULL	NULL	NULL
Dr07562	NULL	NULL	NULL	IPR001810|IPR006553	F-box domain|Leucine-rich repeat, cysteine-containing subtype	GO:0005515	NULL	NULL
Dr07575	GO:0003743|GO:0005840|GO:0006446	NULL	translation initiation factor eif-2b beta subunit	IPR000649	Initiation factor 2B-related	GO:0044237	EC:5.3.1.23	KEGG: 00270+5.3.1.23|MetaCyc: PWY-6755|MetaCyc: PWY-7174|MetaCyc: PWY-7270|UniPathway: UPA00904
Dr07534	GO:0009507	NULL	uncharacterized protein	NULL	NULL	NULL	NULL	NULL
Dr07537	GO:0006810	NULL	vam6 vps39-like protein	IPR000547|IPR001180|IPR019452|IPR019453	Clathrin, heavy chain/VPS, 7-fold repeat|Citron-like|Vacuolar sorting protein 39/Transforming growth factor beta receptor-associated domain 1|Vacuolar sorting protein 39/Transforming growth factor beta receptor-associated domain 2	GO:0006886|GO:0016192|GO:0005083	NULL	NULL
Dr07538	GO:0016023|GO:0016020	NULL	uncharacterized protein loc100845014	NULL	NULL	NULL	NULL	NULL
Dr07540	GO:0006468|GO:0004674|GO:0005739|GO:0071944|GO:0005524|GO:0007165|GO:0016020|GO:0009069	EC:2.7.11.0	probable receptor protein kinase tmk1-like	IPR000719|IPR013210|IPR025875|IPR011009|IPR013320|IPR002290|IPR003591|IPR017441|IPR008271	Protein kinase domain|Leucine-rich repeat-containing N-terminal, type 2|Leucine rich repeat 4|Protein kinase-like domain|Concanavalin A-like lectin/glucanase, subgroup|Serine/threonine- / dual specificity protein kinase, catalytic domain|Leucine-rich repeat, typical subtype|Protein kinase, ATP binding site|Serine/threonine-protein kinase, active site	GO:0004672|GO:0005524|GO:0006468|GO:0016772|GO:0004674	NULL	NULL
Dr07559	GO:0016740|GO:0016020	NULL	dolichol-p-mannose mannosyltransferase	IPR007315	GPI mannosyltransferase 2	GO:0006506|GO:0016758	EC:2.4.1.-	KEGG: 00051+2.4.1.-|KEGG: 00512+2.4.1.-|KEGG: 00513+2.4.1.-|KEGG: 00514+2.4.1.-|KEGG: 00522+2.4.1.-|KEGG: 00533+2.4.1.-|KEGG: 00540+2.4.1.-|KEGG: 00550+2.4.1.-|KEGG: 00561+2.4.1.-|KEGG: 00563+2.4.1.-|KEGG: 00600+2.4.1.-|KEGG: 00601+2.4.1.-|KEGG: 00603+2.4.1.-|KEGG: 00604+2.4.1.-|KEGG: 00906+2.4.1.-|KEGG: 00908+2.4.1.-|KEGG: 00941+2.4.1.-|KEGG: 00942+2.4.1.-|KEGG: 00944+2.4.1.-|KEGG: 00945+2.4.1.-…
Dr07576	GO:0003677|GO:0006744|GO:0005739	NULL	uncharacterized protein	IPR013718|IPR015893|IPR012762	COQ9|Tetracycline transcriptional regulator, TetR-like, C-terminal|Ubiquinone biosynthesis protein COQ9	GO:0003677|GO:0006744	NULL	UniPathway: UPA00232
Dr22032	NULL	NULL	NULL	NULL	NULL	NULL	NULL	NULL
Dr22040	GO:0003746|GO:0005739|GO:0006184|GO:0003924|GO:0005525|GO:0005840|GO:0006448	NULL	elongation factor-like protein	IPR006298|IPR000795|IPR000640|IPR004161|IPR009000|IPR027417|IPR009022	GTP-binding protein TypA|Elongation factor, GTP-binding domain|Translation elongation factor EFG, V domain|Translation elongation factor EFTu/EF1A, domain 2|Translation protein, beta-barrel domain|P-loop containing nucleoside triphosphate hydrolase|Elongation factor G, III-V domain	GO:0005525|GO:0003924	NULL	NULL
Dr22044	GO:0009705|GO:0006886	NULL	protein	IPR016534|IPR006925|IPR006926|IPR017986|IPR011042	Vacuolar protein sorting-associated protein 16|Vps16, C-terminal|Vps16, N-terminal|WD40-repeat-containing domain|Six-bladed beta-propeller, TolB-like	GO:0006886|GO:0005737|GO:0005515	NULL	NULL
Dr22070	GO:0016740|GO:0009536	NULL	transferring glycosyl	IPR003347	JmjC domain	GO:0005515	NULL	NULL
Dr22076	GO:0004046|GO:0006520|GO:0006508|GO:0008237|GO:0005739|GO:0000051	EC:3.5.1.14	aminoacylase-1 isoform 1	IPR002933|IPR011650|IPR010159|IPR001261	Peptidase M20|Peptidase M20, dimerisation domain|N-acyl-L-amino-acid amidohydrolase|ArgE/DapE/ACY1/CPG2/YscS, conserved site	GO:0008152|GO:0016787|GO:0004046|GO:0005737|GO:0006520|GO:0006508|GO:0008237	EC:3.5.1.14	KEGG: 00330+3.5.1.14
Dr07621	GO:0016020	NULL	uncharacterized protein	NULL	NULL	NULL	NULL	NULL
Dr07642	GO:0016020	NULL	adipose-regulatory protein	IPR009617	Adipose-regulatory protein, Seipin	NULL	NULL	NULL
Dr07655	GO:0005739|GO:0006184|GO:0042254|GO:0000166|GO:0003924	NULL	gtpase family protein	IPR006073|IPR027417|IPR023179	GTP binding domain|P-loop containing nucleoside triphosphate hydrolase|GTP-binding protein, orthogonal bundle domain	GO:0005525	NULL	NULL
Dr07696	NULL	NULL	NULL	NULL	NULL	NULL	NULL	NULL
Dr07721	NULL	NULL	NULL	IPR000648|IPR011993|IPR001849	Oxysterol-binding protein|Pleckstrin homology-like domain|Pleckstrin homology domain	GO:0005515|GO:0005543	NULL	NULL
Dr07732	GO:0009536	NULL	pentatricopeptide repeat-containing protein	IPR002885|IPR011990	Pentatricopeptide repeat|Tetratricopeptide-like helical	GO:0005515	NULL	NULL
Dr07672	GO:0032259|GO:0009536|GO:0008168	EC:2.1.1.0	ribosomal rna-processing protein 8	IPR007823	Methyltransferase-related	GO:0008168	EC:2.1.1.-	KEGG: 00130+2.1.1.-|KEGG: 00253+2.1.1.-|KEGG: 00270+2.1.1.-|KEGG: 00340+2.1.1.-|KEGG: 00350+2.1.1.-|KEGG: 00360+2.1.1.-|KEGG: 00380+2.1.1.-|KEGG: 00450+2.1.1.-|KEGG: 00522+2.1.1.-|KEGG: 00624+2.1.1.-|KEGG: 00627+2.1.1.-|KEGG: 00860+2.1.1.-|KEGG: 00940+2.1.1.-|KEGG: 00941+2.1.1.-|KEGG: 00942+2.1.1.-|KEGG: 00945+2.1.1.-|KEGG: 00950+2.1.1.-|KEGG: 00981+2.1.1.-
Dr07682	NULL	NULL	NULL	IPR027356|IPR011333	NPH3 domain|BTB/POZ fold	NULL	NULL	UniPathway: UPA00143
Dr07657	GO:0022857|GO:0009507|GO:0016020	NULL	inorganic phosphate transporter 2-1	IPR001204	Phosphate transporter	GO:0005315|GO:0006817|GO:0016020	NULL	Reactome: REACT_15518
Dr07640	GO:0009987|GO:0003723|GO:0048500	NULL	signal recognition particle 9 kda protein	IPR008832|IPR009018	Signal recognition particle, SRP9 subunit|Signal recognition particle, SRP9/SRP14 subunit	GO:0006614|GO:0008312|GO:0045900|GO:0048500	NULL	Reactome: REACT_15380
Dr07647	GO:0009536	NULL	pentatricopeptide repeat-containing	IPR002885|IPR011990	Pentatricopeptide repeat|Tetratricopeptide-like helical	GO:0005515	NULL	NULL
Dr07651	NULL	NULL	NULL	IPR011598	Myc-type, basic helix-loop-helix (bHLH) domain	GO:0046983	NULL	NULL
Dr07665	NULL	NULL	NULL	IPR000270|IPR000433|IPR009060	Phox/Bem1p|Zinc finger, ZZ-type|UBA-like	GO:0005515|GO:0008270	NULL	NULL
Dr07678	GO:0017111|GO:0009536|GO:0000166	EC:3.6.1.15	pachytene checkpoint protein 2 homolog	IPR003959|IPR027417|IPR003960	ATPase, AAA-type, core|P-loop containing nucleoside triphosphate hydrolase|ATPase, AAA-type, conserved site	GO:0005524	NULL	NULL
Dr22088	NULL	NULL	NULL	NULL	NULL	NULL	NULL	NULL
Dr22092	GO:0009642|GO:0006979|GO:0031977|GO:0010555|GO:0000413|GO:0006457|GO:0009651|GO:0042742|GO:0009941|GO:0003755|GO:0009737|GO:0009535|GO:0009570|GO:0019344|GO:0022626|GO:0048046	EC:5.2.1.8	peptidyl-prolyl cis-trans isomerase cyp20-3	IPR002130|IPR020892	Cyclophilin-like peptidyl-prolyl cis-trans isomerase domain|Cyclophilin-type peptidyl-prolyl cis-trans isomerase, conserved site	GO:0003755|GO:0006457	NULL	NULL
Dr22100	NULL	NULL	NULL	IPR010756	Hepatocellular carcinoma-associated antigen 59	NULL	NULL	NULL
Dr22107	GO:0016023|GO:0009651|GO:0005739|GO:0050897	NULL	cbs domain protein	IPR000644|IPR013785	CBS domain|Aldolase-type TIM barrel	GO:0030554|GO:0003824	NULL	NULL
Dr22138	NULL	NULL	NULL	IPR027443	Isopenicillin N synthase-like	NULL	NULL	NULL
Dr22140	GO:0009536	NULL	trna-specific adenosine deaminase 1-like	IPR002466	Adenosine deaminase/editase	GO:0003723|GO:0004000|GO:0006396	NULL	NULL
Dr07751	GO:0005488|GO:0016788|GO:0005739	NULL	fanconi-associated nuclease 1-like protein	IPR014883|IPR014905|IPR006642	VRR-NUC domain|HIP116, Rad5p N-terminal|Zinc finger, Rad18-type putative	GO:0016788|GO:0003676|GO:0008270|GO:0016818|GO:0003677|GO:0006281	NULL	NULL
Dr07744	GO:0003676|GO:0005739|GO:0004824|GO:0046872|GO:0048481|GO:0005524|GO:0006430|GO:0009507|GO:0009085	EC:6.1.1.6	lysyl-trna synthetase	IPR018150|IPR002313|IPR004364|IPR004365|IPR012340|IPR018149|IPR006195	Aminoacyl-tRNA synthetase, class II (D/K/N)-like|Lysine-tRNA ligase, class II|Aminoacyl-tRNA synthetase, class II (D/K/N)|OB-fold nucleic acid binding domain, AA-tRNA synthetase-type|Lysyl-tRNA synthetase, class II, C-terminal|Nucleic acid-binding, OB-fold|Aminoacyl-tRNA synthetase, class II	GO:0000166|GO:0004812|GO:0005524|GO:0006418|GO:0004824|GO:0006430|GO:0003676|GO:0005737	EC:6.1.1.6	Reactome: REACT_71|KEGG: 00970+6.1.1.6
Dr07749	NULL	NULL	NULL	IPR001876	Zinc finger, RanBP2-type	GO:0008270	NULL	NULL
Dr07770	NULL	NULL	NULL	NULL	NULL	NULL	NULL	NULL
Dr07768	GO:0016023|GO:0016787	NULL	nudix hydrolase 9-like	IPR000086|IPR015797	NUDIX hydrolase domain|NUDIX hydrolase domain-like	GO:0016787	NULL	NULL
Dr26117	GO:0016787	NULL	pectin methylesterase	IPR000070|IPR006501|IPR011050|IPR012334|IPR018040	Pectinesterase, catalytic|Pectinesterase inhibitor domain|Pectin lyase fold/virulence factor|Pectin lyase fold|Pectinesterase, active site	GO:0005618|GO:0030599|GO:0042545|GO:0004857	EC:3.1.1.11	KEGG: 00040+3.1.1.11|KEGG: 00500+3.1.1.11|MetaCyc: PWY-1081|MetaCyc: PWY-7243|MetaCyc: PWY-7246|MetaCyc: PWY-7248|UniPathway: UPA00545
Dr22192	GO:0044434|GO:0005739	NULL	chlororespiratory reduction 6	IPR014946	Protein of unknown function DUF1817	NULL	NULL	NULL
Dr07788	GO:0003729|GO:0031123|GO:0006397|GO:0005634	NULL	cleavage stimulation factor subunit 3	IPR008847|IPR011990|IPR003107|IPR019734|IPR013026	Suppressor of forked|Tetratricopeptide-like helical|RNA-processing protein, HAT helix|Tetratricopeptide repeat|Tetratricopeptide repeat-containing domain	GO:0005634|GO:0006397|GO:0005515|GO:0005622|GO:0006396	NULL	NULL
Dr07802	GO:0015299|GO:0055085|GO:0006812|GO:0016021|GO:0005739|GO:0006885	NULL	exostosin family protein	IPR004263	Exostosin-like	NULL	NULL	NULL
Dr07835	NULL	NULL	NULL	IPR028015	Coiled-coil domain-containing protein 84	NULL	NULL	NULL
Dr07873	NULL	NULL	NULL	NULL	NULL	NULL	NULL	NULL
Dr07823	NULL	NULL	NULL	NULL	NULL	NULL	NULL	NULL
Dr07834	NULL	NULL	NULL	IPR008610	Eukaryotic rRNA processing	NULL	NULL	NULL
Dr07836	GO:0008168|GO:0032259	EC:2.1.1.0	alpha n-terminal protein methyltransferase 1-like	IPR008576	Protein of unknown function DUF858, methyltransferase-like	GO:0008168	NULL	NULL
Dr07851	NULL	NULL	NULL	NULL	NULL	NULL	NULL	NULL
Dr07854	GO:0005794|GO:0043167|GO:0032259|GO:0008168	EC:2.1.1.0	atp binding	IPR004159	Putative S-adenosyl-L-methionine-dependent methyltransferase	GO:0008168	EC:2.1.1.-	KEGG: 00130+2.1.1.-|KEGG: 00253+2.1.1.-|KEGG: 00270+2.1.1.-|KEGG: 00340+2.1.1.-|KEGG: 00350+2.1.1.-|KEGG: 00360+2.1.1.-|KEGG: 00380+2.1.1.-|KEGG: 00450+2.1.1.-|KEGG: 00522+2.1.1.-|KEGG: 00624+2.1.1.-|KEGG: 00627+2.1.1.-|KEGG: 00860+2.1.1.-|KEGG: 00940+2.1.1.-|KEGG: 00941+2.1.1.-|KEGG: 00942+2.1.1.-|KEGG: 00945+2.1.1.-|KEGG: 00950+2.1.1.-|KEGG: 00981+2.1.1.-
Dr07855	GO:0005507|GO:0016491|GO:0005739|GO:0000166|GO:0055114	NULL	pyridine nucleotide-disulfide oxidoreductase domain-containing protein 2	NULL	NULL	NULL	NULL	NULL
Dr07901	GO:0050660|GO:0009409|GO:0046686|GO:0016656|GO:0010319|GO:0005524|GO:0009570|GO:0005739|GO:0055114|GO:0006118|GO:0019852	EC:1.6.5.4	monodehydroascorbate reductase	IPR001327|IPR023753|IPR016156|IPR013027	Pyridine nucleotide-disulphide oxidoreductase, NAD-binding domain|Pyridine nucleotide-disulphide oxidoreductase, FAD/NAD(P)-binding domain|FAD-dependent pyridine nucleotide-disulphide oxidoreductase|FAD/NAD-linked reductase, dimerisation domain	GO:0016491|GO:0050660|GO:0055114	NULL	NULL
Dr22346	NULL	NULL	NULL	NULL	NULL	NULL	NULL	NULL
Dr22350	GO:0016791	EC:3.1.3.0	myotubularin-related protein 2-like	IPR010569|IPR011993|IPR017906|IPR016130	Myotubularin-like phosphatase domain|Pleckstrin homology-like domain|Myotubularin phosphatase domain|Protein-tyrosine phosphatase, active site	GO:0016311|GO:0016791|GO:0004725	NULL	NULL
Dr22354	GO:0050896|GO:0044763|GO:0009536	NULL	tab2 protein	IPR009472	Protein of unknown function DUF1092	NULL	NULL	NULL
[truncated: 1,069 more rows]
