# Supplementary material for: Genome sequencing of the staple food crop white Guinea yam enables the development of a molecular marker for sex determination
Source: BMC Biol. 2017 Sep 19;15:86. doi: 10.1186/s12915-017-0419-x (PMC5604175; doi:10.1186/s12915-017-0419-x)
Supplement: Supplementary file 8 — Functional annotation of D. rotundata genes with no orthologous genes found in A. thaliana, B. distachyon, O. sativa, E. guineensis, P. dactylifera, and M. acuminata. (XLSX 720 kb) [file 12915_2017_419_MOESM8_ESM.xlsx]

## Sheet: Supplemental dataset S6
Additional file 8: Supplemental dataset S6. Functional annotation of D. rotundata genes with no orthologous genes found in A. thaliana, B. distachyon, O. sativa, E. guineensis, P. dactylifera and M.acuminata.
Gene_ID	Blast2GO_GO_term	Blast2GO_EC_Number	Blast2GO_GO_Description	Interproscan_IPR	Interproscan_IPR_Description	Interproscan_GO_term	Interproscan_EC_Number	Interproscan_Pathways
Dr24685	GO:0042742|GO:0022626|GO:0019773|GO:0006511|GO:0010043|GO:0005634|GO:0004298	EC:3.4.25.0	proteasome subunit alpha type-2-b	IPR000426	Proteasome, alpha-subunit, N-terminal domain	GO:0004175|GO:0006511|GO:0019773	NULL	Reactome: REACT_11045|Reactome: REACT_13|Reactome: REACT_13635|Reactome: REACT_152|Reactome: REACT_1538|Reactome: REACT_383|Reactome: REACT_578|Reactome: REACT_6185|Reactome: REACT_6850
Dr14330	NULL	NULL	NULL	NULL	NULL	NULL	NULL	NULL
Dr14362	NULL	NULL	NULL	NULL	NULL	NULL	NULL	NULL
Dr14454	GO:0016023|GO:0006950|GO:0004806|GO:0004091|GO:0016042|GO:0046486	EC:3.1.1.3|EC:3.1.1.1	calmodulin-binding heat shock protein	IPR002921|IPR005592	Lipase, class 3|Mono-/di-acylglycerol lipase, N-terminal	GO:0004806|GO:0006629|GO:0004091|GO:0016042	NULL	Reactome: REACT_14797|Reactome: REACT_604
Dr14457	NULL	NULL	NULL	IPR001025|IPR003618	Bromo adjacent homology (BAH) domain|Transcription elongation factor S-II, central domain	GO:0003677|GO:0006351	NULL	NULL
Dr14461	NULL	NULL	NULL	IPR001611	Leucine-rich repeat	GO:0005515	NULL	NULL
Dr14408	NULL	NULL	NULL	IPR009009|IPR014733	RlpA-like double-psi beta-barrel domain|Barwin-like endoglucanase	NULL	NULL	NULL
Dr14412	GO:0009987|GO:0009536|GO:0032259|GO:0016740	NULL	histone-lysine n- h3 lysine-9 specific suvh9	IPR001214|IPR003105|IPR007728|IPR015947|IPR003606|IPR025794	SET domain|SRA-YDG|Pre-SET domain|PUA-like domain|Pre-SET zinc-binding sub-group|Histone H3-K9 methyltransferase, plant	GO:0005515|GO:0042393|GO:0005634|GO:0008270|GO:0018024|GO:0034968|GO:0016571	EC:2.1.1.43	KEGG: 00310+2.1.1.43
Dr14449	GO:0016023|GO:0005886|GO:0004190|GO:0016021|GO:0010008	EC:3.4.23.0	signal peptide peptidase-like 2b-like	IPR007369|IPR000719|IPR003137|IPR011009|IPR013320|IPR014729|IPR006639|IPR007087	Peptidase A22B, signal peptide peptidase|Protein kinase domain|Protease-associated domain, PA|Protein kinase-like domain|Concanavalin A-like lectin/glucanase, subgroup|Rossmann-like alpha/beta/alpha sandwich fold|Presenilin/signal peptide peptidase|Zinc finger, C2H2	GO:0004190|GO:0016021|GO:0004672|GO:0005524|GO:0006468|GO:0016772|GO:0046872	NULL	NULL
Dr14546	NULL	NULL	NULL	NULL	NULL	NULL	NULL	NULL
Dr14495	NULL	NULL	NULL	NULL	NULL	NULL	NULL	NULL
Dr14500	GO:0016020	NULL	probable s-acyltransferase at3g26935-like	NULL	NULL	NULL	NULL	NULL
Dr14479	NULL	NULL	NULL	IPR014764|IPR005176	Defective-in-cullin neddylation protein|Potentiating neddylation domain	NULL	NULL	NULL
Dr14508	GO:0003676|GO:0005634|GO:0004535|GO:0051252	EC:3.1.13.4	ribonuclease caf1	IPR006941|IPR012337	Ribonuclease CAF1|Ribonuclease H-like domain	GO:0005634|GO:0003676	NULL	NULL
Dr14524	GO:0005739	NULL	uncharacterized protein	NULL	NULL	NULL	NULL	NULL
Dr14525	GO:0005739	NULL	uncharacterized protein	NULL	NULL	NULL	NULL	NULL
Dr14624	GO:0050896	NULL	burp domain-containing protein	IPR004873	BURP domain	NULL	NULL	NULL
Dr14587	NULL	NULL	NULL	IPR004328	BRO1 domain	NULL	NULL	NULL
Dr14632	GO:0016132|GO:0046872|GO:0016705|GO:0004497|GO:0016023|GO:0048366|GO:0020037|GO:0016020	NULL	steroid 22-alpha-hydroxylase	IPR001128|IPR002401|IPR017972	Cytochrome P450|Cytochrome P450, E-class, group I|Cytochrome P450, conserved site	GO:0005506|GO:0016705|GO:0020037|GO:0055114	NULL	Reactome: REACT_13433
Dr14640	NULL	NULL	NULL	IPR001563	Peptidase S10, serine carboxypeptidase	GO:0004185|GO:0006508	NULL	NULL
Dr14691	GO:0044464	NULL	protein binding protein	IPR021832|IPR020683	Ankyrin repeat domain-containing protein 13|Ankyrin repeat-containing domain	NULL	NULL	NULL
Dr14692	NULL	NULL	NULL	NULL	NULL	NULL	NULL	NULL
Dr14779	GO:0045735|GO:0030145|GO:0016023|GO:0031012|GO:0005618|GO:0048046|GO:0009651	NULL	germin-like protein	IPR006045|IPR011051|IPR014710|IPR001929	Cupin 1|Germin|RmlC-like cupin domain|RmlC-like jelly roll fold	GO:0045735|GO:0030145	NULL	NULL
Dr14810	NULL	NULL	NULL	NULL	NULL	NULL	NULL	NULL
Dr14772	GO:0046872|GO:0016023|GO:0005576	NULL	germin a	IPR006045|IPR011051|IPR014710|IPR001929|IPR019780	Cupin 1|Germin|RmlC-like cupin domain|RmlC-like jelly roll fold|Germin, manganese binding site	GO:0045735|GO:0030145	NULL	NULL
Dr14773	GO:0045735|GO:0030145|GO:0016023|GO:0031012|GO:0005618|GO:0048046|GO:0009651	NULL	germin a	IPR006045|IPR011051|IPR014710|IPR001929|IPR019780	Cupin 1|Germin|RmlC-like cupin domain|RmlC-like jelly roll fold|Germin, manganese binding site	GO:0045735|GO:0030145	NULL	NULL
Dr14775	GO:0045735|GO:0030145|GO:0016023|GO:0048046	NULL	germin a	IPR006045|IPR011051|IPR014710|IPR001929|IPR019780	Cupin 1|Germin|RmlC-like cupin domain|RmlC-like jelly roll fold|Germin, manganese binding site	GO:0045735|GO:0030145	NULL	NULL
Dr14785	NULL	NULL	NULL	NULL	NULL	NULL	NULL	NULL
Dr14739	NULL	NULL	NULL	IPR008138|IPR011001|IPR008139	Saposin-like type B, 2|Saposin-like|Saposin B	NULL	NULL	NULL
Dr14731	GO:0005488	NULL	glyceraldehyde-3-phosphate dehydrogenase	IPR020831|IPR020828|IPR020829|IPR016040	Glyceraldehyde/Erythrose phosphate dehydrogenase family|Glyceraldehyde 3-phosphate dehydrogenase, NAD(P) binding domain|Glyceraldehyde 3-phosphate dehydrogenase, catalytic domain|NAD(P)-binding domain	GO:0016620|GO:0055114	NULL	Reactome: REACT_474
Dr14745	NULL	NULL	NULL	IPR023342	APO domain	GO:0003723	NULL	NULL
Dr24763	NULL	NULL	NULL	IPR000657	Geminivirus AL3 coat protein	GO:0016032	NULL	NULL
Dr14816	NULL	NULL	NULL	NULL	NULL	NULL	NULL	NULL
Dr24776	GO:0008233|GO:0044464	NULL	subtilisin-like protease sdd1-like	IPR010259	Proteinase inhibitor I9	GO:0004252|GO:0042802|GO:0043086	NULL	NULL
Dr24777	GO:0016787	NULL	subtilisin-like protease sdd1-like	IPR015500|IPR000209	Peptidase S8, subtilisin-related|Peptidase S8/S53 domain	GO:0004252|GO:0006508	NULL	NULL
Dr14833	NULL	NULL	NULL	NULL	NULL	NULL	NULL	NULL
Dr14837	NULL	NULL	NULL	NULL	NULL	NULL	NULL	NULL
Dr14848	GO:0005737|GO:0006457|GO:0005886|GO:0000413|GO:0005634|GO:0003755	EC:5.2.1.8	peptidyl-prolyl cis-trans isomerase pin1	IPR000297|IPR023058	Peptidyl-prolyl cis-trans isomerase, PpiC-type|Peptidyl-prolyl cis-trans isomerase, PpiC-type, conserved site	GO:0016853	NULL	NULL
Dr14890	GO:0006412|GO:0005618|GO:0003723|GO:0008026|GO:0005524|GO:0044424|GO:0016020	NULL	eukaryotic initiation factor 4a	IPR011545|IPR001650|IPR027417|IPR014001|IPR014014|IPR000629	DNA/RNA helicase, DEAD/DEAH box type, N-terminal|Helicase, C-terminal|P-loop containing nucleoside triphosphate hydrolase|Helicase, superfamily 1/2, ATP-binding domain|RNA helicase, DEAD-box type, Q motif|RNA helicase, ATP-dependent, DEAD-box, conserved site	GO:0003676|GO:0005524|GO:0008026|GO:0004386	NULL	NULL
Dr14899	GO:0016301|GO:0044699|GO:0044424|GO:0050789|GO:0009987	NULL	map kinase kinase	IPR000719|IPR011009	Protein kinase domain|Protein kinase-like domain	GO:0004672|GO:0005524|GO:0006468|GO:0016772	NULL	NULL
Dr14913	GO:0048731|GO:0019829|GO:0005515|GO:0043167|GO:0000166|GO:0022414|GO:0006812|GO:0016020	NULL	calcium-transporting atpase plasma membrane-type-like	IPR008250|IPR006068|IPR004014|IPR023214|IPR024750|IPR023299|IPR023298|IPR001757|IPR006408|IPR018303	P-type ATPase, A domain|Cation-transporting P-type ATPase, C-terminal|Cation-transporting P-type ATPase, N-terminal|HAD-like domain|Calcium-transporting P-type ATPase, N-terminal autoinhibitory domain|Cation-transporting P-type ATPase|P-type ATPase, cytoplasmic domain N|P-type ATPase, transmembrane domain|Calcium-transporting P-type ATPase, subfamily IIB|P-type ATPase, phosphorylation site	GO:0000166|GO:0046872|GO:0005516|GO:0006812|GO:0016021|GO:0019829|GO:0005388|GO:0005524|GO:0016020|GO:0070588	NULL	NULL
Dr14928	NULL	NULL	NULL	NULL	NULL	NULL	NULL	NULL
Dr14930	GO:0016491|GO:0005739	NULL	lysine-ketoglutarate reductase saccharopine dehydrogenase bifunctional enzyme	IPR005097|IPR016040	Saccharopine dehydrogenase / Homospermidine synthase|NAD(P)-binding domain	GO:0016491|GO:0055114	NULL	NULL
Dr14934	NULL	NULL	NULL	IPR001841|IPR013083	Zinc finger, RING-type|Zinc finger, RING/FYVE/PHD-type	GO:0005515|GO:0008270	NULL	NULL
Dr14935	NULL	NULL	NULL	IPR001841|IPR013083	Zinc finger, RING-type|Zinc finger, RING/FYVE/PHD-type	GO:0005515|GO:0008270	NULL	NULL
Dr02936	GO:0016740	NULL	udp-glycosyltransferase 73c3-like	IPR002213	UDP-glucuronosyl/UDP-glucosyltransferase	GO:0008152|GO:0016758	NULL	NULL
Dr02991	NULL	NULL	NULL	IPR006734|IPR026960	Protein of unknown function DUF597|Reverse transcriptase zinc-binding domain	NULL	NULL	NULL
Dr03025	GO:0004519|GO:0090304|GO:0016740|GO:0043167|GO:0000166	NULL	replication-associated protein	IPR022690|IPR006501	Geminivirus AL1 replication-associated protein, catalytic domain|Pectinesterase inhibitor domain	GO:0006260|GO:0004857|GO:0030599	EC:3.1.1.11	KEGG: 00040+3.1.1.11|KEGG: 00500+3.1.1.11|MetaCyc: PWY-1081|MetaCyc: PWY-7243|MetaCyc: PWY-7246|MetaCyc: PWY-7248|UniPathway: UPA00545
Dr03063	GO:0016310|GO:0004674|GO:0000166|GO:0009069	EC:2.7.11.0	probable receptor-like protein kinase at1g67000-like	IPR025287	Wall-associated receptor kinase galacturonan-binding domain	GO:0030247	NULL	NULL
Dr03055	GO:0005886|GO:0009507|GO:0005198	NULL	vesicle-associated protein 2-1-like	IPR000535|IPR001857|IPR008962|IPR008991	MSP domain|Ribosomal protein L19|PapD-like|Translation protein SH3-like domain	GO:0005198|GO:0003735|GO:0005622|GO:0005840|GO:0006412	NULL	NULL
Dr03088	NULL	NULL	NULL	IPR019378|IPR024709	GDP-fucose protein O-fucosyltransferase|O-fucosyltransferase, plant	NULL	EC:2.4.1.221	KEGG: 00514+2.4.1.221|UniPathway: UPA00378
Dr03100	GO:0016491|GO:0005488	NULL	cytochrome p450	IPR001128|IPR002401|IPR017972	Cytochrome P450|Cytochrome P450, E-class, group I|Cytochrome P450, conserved site	GO:0005506|GO:0016705|GO:0020037|GO:0055114	NULL	Reactome: REACT_13433
Dr03083	GO:0035251|GO:0008152	NULL	udp-glucose: flavonoid 7-o-glucosyltransferase	IPR002213	UDP-glucuronosyl/UDP-glucosyltransferase	GO:0008152|GO:0016758	NULL	NULL
Dr03116	NULL	NULL	NULL	IPR012337	Ribonuclease H-like domain	GO:0003676	NULL	NULL
Dr03146	GO:0009987|GO:0009536|GO:0016023|GO:0016301	NULL	g-type lectin s-receptor-like serine threonine-protein kinase at2g19130-like	IPR001245|IPR013227|IPR011009|IPR013320|IPR000719|IPR003609|IPR017441	Serine-threonine/tyrosine-protein kinase catalytic domain|PAN-2 domain|Protein kinase-like domain|Concanavalin A-like lectin/glucanase, subgroup|Protein kinase domain|Apple-like|Protein kinase, ATP binding site	GO:0004672|GO:0006468|GO:0016772|GO:0005524	NULL	NULL
Dr03153	NULL	NULL	NULL	IPR001611|IPR013210|IPR025875|IPR003591	Leucine-rich repeat|Leucine-rich repeat-containing N-terminal, type 2|Leucine rich repeat 4|Leucine-rich repeat, typical subtype	GO:0005515	NULL	NULL
Dr03155	NULL	NULL	NULL	IPR001611|IPR025875|IPR003591	Leucine-rich repeat|Leucine rich repeat 4|Leucine-rich repeat, typical subtype	GO:0005515	NULL	NULL
Dr03184	GO:0015691|GO:0006828|GO:0006816|GO:0009705|GO:0055085|GO:0015369|GO:0016021|GO:0006885	NULL	ca2+ antiporter cation exchanger	IPR004837|IPR004798	Sodium/calcium exchanger membrane region|Calcium/proton exchanger CAX	GO:0016021|GO:0055085|GO:0006816|GO:0015369	NULL	Reactome: REACT_15518
Dr03208	NULL	NULL	NULL	IPR006747	Protein of unknown function DUF599	NULL	NULL	NULL
Dr03171	GO:0000166|GO:0009987	NULL	af203882_1dynamin homolog	NULL	NULL	NULL	NULL	NULL
Dr03265	NULL	NULL	NULL	IPR004294|IPR008551	Carotenoid oxygenase|Protein of unknown function DUF833	NULL	NULL	NULL
Dr03273	NULL	NULL	NULL	NULL	NULL	NULL	NULL	NULL
Dr03237	NULL	NULL	NULL	NULL	NULL	NULL	NULL	NULL
Dr03275	GO:0016023|GO:0016310|GO:0004672|GO:0016020|GO:0009536|GO:0005739|GO:0000166	NULL	g-type lectin s-receptor-like serine threonine-protein kinase at1g34300-like	IPR000719|IPR011009|IPR002290|IPR017441|IPR008271	Protein kinase domain|Protein kinase-like domain|Serine/threonine- / dual specificity protein kinase, catalytic domain|Protein kinase, ATP binding site|Serine/threonine-protein kinase, active site	GO:0004672|GO:0005524|GO:0006468|GO:0016772|GO:0004674	NULL	NULL
Dr03291	GO:0016023|GO:0005215|GO:0016020|GO:0006810	NULL	glutamate receptor -like	IPR000504|IPR001638|IPR001828|IPR028082|IPR012677|IPR000337|IPR001320	RNA recognition motif domain|Extracellular solute-binding protein, family 3|Extracellular ligand-binding receptor|GPCR, family 3|Periplasmic binding protein-like I|Nucleotide-binding, alpha-beta plait|Ionotropic glutamate receptor	GO:0003676|GO:0005215|GO:0006810|GO:0000166|GO:0004930|GO:0007186|GO:0016021|GO:0004970|GO:0005234|GO:0016020	NULL	Reactome: REACT_14797
Dr03368	NULL	NULL	NULL	NULL	NULL	NULL	NULL	NULL
Dr03306	NULL	NULL	NULL	IPR001841|IPR013083	Zinc finger, RING-type|Zinc finger, RING/FYVE/PHD-type	GO:0005515|GO:0008270	NULL	NULL
Dr03460	GO:0005829|GO:0005507|GO:0009086|GO:0008705|GO:0008270|GO:0005777|GO:0009651|GO:0009941|GO:0003871|GO:0032259|GO:0009570|GO:0010043|GO:0046686|GO:0005886|GO:0048046	EC:2.1.1.13|EC:2.1.1.14	5-methyltetrahydropteroyltriglutamate-homocysteine expressed	IPR002629|IPR013215	Methionine synthase, vitamin-B12 independent|Cobalamin (vitamin B12)-independent methionine synthase MetE, N-terminal	GO:0003871|GO:0009086|GO:0008270|GO:0008652	EC:2.1.1.14	KEGG: 00270+2.1.1.14|KEGG: 00450+2.1.1.14|MetaCyc: PWY-5041|MetaCyc: PWY-6151|MetaCyc: PWY-6936|MetaCyc: PWY-702|UniPathway: UPA00051
Dr03462	GO:0005829|GO:0005507|GO:0009086|GO:0008705|GO:0008270|GO:0005777|GO:0009651|GO:0009941|GO:0003871|GO:0032259|GO:0009570|GO:0010043|GO:0046686|GO:0005886|GO:0048046	EC:2.1.1.13|EC:2.1.1.14	5-methyltetrahydropteroyltriglutamate-homocysteine expressed	IPR002629	Methionine synthase, vitamin-B12 independent	GO:0003871|GO:0009086	EC:2.1.1.14	KEGG: 00270+2.1.1.14|KEGG: 00450+2.1.1.14|MetaCyc: PWY-5041|MetaCyc: PWY-6151|MetaCyc: PWY-6936|MetaCyc: PWY-702|UniPathway: UPA00051
Dr03490	GO:0004721|GO:0005829|GO:0005506|GO:0030145|GO:0005886|GO:0006470	EC:3.1.3.16	protein	IPR004843|IPR011498|IPR015915|IPR006186|IPR012391	Phosphoesterase domain|Kelch repeat type 2|Serine/threonine-specific protein phosphatase/bis(5-nucleosyl)-tetraphosphatase|Kelch-type beta propeller|Serine/threonine protein phosphatase, BSU1	GO:0016787|GO:0005515|GO:0004721|GO:0005506|GO:0030145	NULL	NULL
Dr03526	GO:0016757|GO:0008152	NULL	udp-glycosyltransferase 91c1-like	IPR002213	UDP-glucuronosyl/UDP-glucosyltransferase	GO:0008152|GO:0016758	NULL	NULL
Dr03527	GO:0008152|GO:0016758|GO:0009536	EC:2.4.1.0	udp-glycosyltransferase 91c1-like	IPR002213	UDP-glucuronosyl/UDP-glucosyltransferase	GO:0008152|GO:0016758	NULL	NULL
Dr03542	GO:0016020	NULL	nodulin-like protein	NULL	NULL	NULL	NULL	NULL
Dr03652	GO:0008270|GO:0005622	NULL	c2h2 zinc finger protein	IPR007087	Zinc finger, C2H2	GO:0046872	NULL	NULL
Dr03653	GO:0006355	NULL	gras family transcription factor	IPR005202|IPR012317	Transcription factor GRAS|Poly(ADP-ribose) polymerase, catalytic domain	GO:0003950	NULL	NULL
Dr03715	NULL	NULL	NULL	NULL	NULL	NULL	NULL	NULL
Dr03635	NULL	NULL	NULL	IPR002902	Gnk2-homologous domain	NULL	NULL	NULL
Dr03641	GO:0009987|GO:0016772|GO:0044464|GO:0006950	NULL	protein	IPR011009	Protein kinase-like domain	GO:0016772	NULL	NULL
Dr03643	GO:0009987|GO:0050896|GO:0016772	NULL	cysteine-rich receptor-like protein kinase	IPR000719|IPR002902|IPR011009|IPR013320|IPR002290|IPR008271	Protein kinase domain|Gnk2-homologous domain|Protein kinase-like domain|Concanavalin A-like lectin/glucanase, subgroup|Serine/threonine- / dual specificity protein kinase, catalytic domain|Serine/threonine-protein kinase, active site	GO:0004672|GO:0005524|GO:0006468|GO:0016772|GO:0004674	NULL	NULL
Dr03670	GO:0009987|GO:0016023|GO:0016301	NULL	g-type lectin s-receptor-like serine threonine-protein kinase at2g19130-like	IPR000719|IPR000858|IPR013227|IPR011009|IPR013320|IPR002290|IPR003609|IPR000742|IPR017441|IPR008271	Protein kinase domain|S-locus glycoprotein|PAN-2 domain|Protein kinase-like domain|Concanavalin A-like lectin/glucanase, subgroup|Serine/threonine- / dual specificity protein kinase, catalytic domain|Apple-like|Epidermal growth factor-like domain|Protein kinase, ATP binding site|Serine/threonine-protein kinase, active site	GO:0004672|GO:0005524|GO:0006468|GO:0048544|GO:0016772|GO:0005515|GO:0004674	NULL	NULL
Dr03688	GO:0043231|GO:0005351|GO:0008643|GO:0016020	NULL	monosaccharide transporter	NULL	NULL	NULL	NULL	NULL
Dr03718	NULL	NULL	NULL	IPR006816	Engulfment/cell motility, ELMO	GO:0005856|GO:0006909	NULL	NULL
Dr03627	NULL	NULL	NULL	IPR000727|IPR010989|IPR006011|IPR006012	Target SNARE coiled-coil domain|t-SNARE|Syntaxin, N-terminal domain|Syntaxin/epimorphin, conserved site	GO:0005515|GO:0016020|GO:0016192|GO:0005484|GO:0006886	NULL	Reactome: REACT_11184
Dr24801	NULL	NULL	NULL	NULL	NULL	NULL	NULL	NULL
Dr14968	GO:0016020|GO:0016023	NULL	nitrate and chloride transporter	IPR016196	Major facilitator superfamily domain, general substrate transporter	NULL	NULL	NULL
Dr14961	GO:0016787	NULL	abhydrolase domain-containing protein fam108c1-like	NULL	NULL	NULL	NULL	NULL
Dr14946	NULL	NULL	NULL	NULL	NULL	NULL	NULL	NULL
Dr14993	NULL	NULL	NULL	NULL	NULL	NULL	NULL	NULL
Dr15002	NULL	NULL	NULL	IPR001611	Leucine-rich repeat	GO:0005515	NULL	NULL
Dr24812	NULL	NULL	NULL	NULL	NULL	NULL	NULL	NULL
Dr15024	NULL	NULL	NULL	NULL	NULL	NULL	NULL	NULL
Dr15089	GO:0008152|GO:0008233	NULL	subtilisin-like protease sdd1-like	IPR015500|IPR000209|IPR003137|IPR010259|IPR023827|IPR023828	Peptidase S8, subtilisin-related|Peptidase S8/S53 domain|Protease-associated domain, PA|Proteinase inhibitor I9|Peptidase S8, subtilisin, Asp-active site|Peptidase S8, subtilisin, Ser-active site	GO:0004252|GO:0006508|GO:0042802|GO:0043086	NULL	NULL
Dr15091	GO:0008152|GO:0008233	NULL	subtilisin-like protease sdd1-like	IPR015500|IPR000209|IPR003137|IPR010259|IPR023827	Peptidase S8, subtilisin-related|Peptidase S8/S53 domain|Protease-associated domain, PA|Proteinase inhibitor I9|Peptidase S8, subtilisin, Asp-active site	GO:0004252|GO:0006508|GO:0042802|GO:0043086	NULL	NULL
Dr15102	GO:0016787	NULL	subtilase family protein	IPR010259|IPR009020	Proteinase inhibitor I9|Proteinase inhibitor, propeptide	GO:0004252|GO:0042802|GO:0043086	NULL	NULL
Dr15078	GO:0009987|GO:0050896|GO:0004672|GO:0044699|GO:0032502	NULL	snf1-related protein kinase catalytic subunit alpha kin10	IPR000719|IPR000449|IPR001772|IPR028375|IPR009060|IPR011009|IPR015940|IPR002290	Protein kinase domain|Ubiquitin-associated domain/translation elongation factor EF-Ts, N-terminal|Kinase associated domain 1 (KA1)|KA1 domain/Ssp2 C-terminal domain|UBA-like|Protein kinase-like domain|Ubiquitin-associated/translation elongation factor EF1B, N-terminal, eukaryote|Serine/threonine- / dual specificity protein kinase, catalytic domain	GO:0004672|GO:0005524|GO:0006468|GO:0005515|GO:0016772	NULL	NULL
Dr15105	NULL	NULL	NULL	NULL	NULL	NULL	NULL	NULL
Dr15108	NULL	NULL	NULL	NULL	NULL	NULL	NULL	NULL
Dr15109	NULL	NULL	NULL	IPR001471|IPR016177	AP2/ERF domain|DNA-binding domain	GO:0003700|GO:0006355|GO:0003677	NULL	NULL
Dr15112	NULL	NULL	NULL	IPR001471|IPR016177	AP2/ERF domain|DNA-binding domain	GO:0003700|GO:0006355|GO:0003677	NULL	NULL
Dr15141	NULL	NULL	NULL	NULL	NULL	NULL	NULL	NULL
Dr15146	GO:0046961|GO:0009941|GO:0046933|GO:0009772|GO:0045261|GO:0015986|GO:0009535|GO:0006119	NULL	atp synthase gamma chain 1	IPR000131	ATPase, F1 complex, gamma subunit	GO:0015986|GO:0045261|GO:0046933|GO:0046961	NULL	NULL
Dr15157	NULL	NULL	NULL	NULL	NULL	NULL	NULL	NULL
Dr15160	GO:0000139|GO:0015780|GO:0005488|GO:0005338|GO:0005351|GO:0008643|GO:0016021	NULL	udp-galactose translocator	IPR007271|IPR010721|IPR004689	Nucleotide-sugar transporter|Protein of unknown function DUF1295|UDP-galactose transporter	GO:0000139|GO:0005351|GO:0008643|GO:0016021|GO:0005338|GO:0015780	NULL	Reactome: REACT_15518
Dr15138	NULL	NULL	NULL	IPR002130	Cyclophilin-like peptidyl-prolyl cis-trans isomerase domain	GO:0003755|GO:0006457	NULL	NULL
Dr15193	GO:0016787	NULL	probable protein phosphatase 2c 12-like	IPR015655|IPR001932	Protein phosphatase 2C|Protein phosphatase 2C (PP2C)-like domain	GO:0003824	NULL	NULL
Dr15194	NULL	NULL	NULL	NULL	NULL	NULL	NULL	NULL
Dr15197	NULL	NULL	NULL	NULL	NULL	NULL	NULL	NULL
Dr15215	NULL	NULL	NULL	IPR022690|IPR022692|IPR001191|IPR001301	Geminivirus AL1 replication-associated protein, catalytic domain|Geminivirus AL1 replication-associated protein, central domain|Geminivirus AL1, replication-associated protein|Geminivirus AL1 replication-associated protein, CLV type	GO:0006260|GO:0016888|GO:0005198|GO:0019028	EC:2.7.7.-	KEGG: 00520+2.7.7.-
Dr15223	NULL	NULL	NULL	IPR002938|IPR003042	Monooxygenase, FAD-binding|Aromatic-ring hydroxylase-like	GO:0008152|GO:0016491	NULL	NULL
Dr15297	NULL	NULL	NULL	IPR008504	ER membrane protein complex subunit 6	GO:0005783|GO:0016021|GO:0072546	NULL	NULL
Dr15302	NULL	NULL	NULL	NULL	NULL	NULL	NULL	NULL
Dr15325	GO:0016799|GO:0016829|GO:0005634|GO:0005829|GO:0009691|GO:0005739	EC:3.2.2.0	cytokinin riboside 5 -monophosphate phosphoribohydrolase log3	IPR005269	Cytokinin riboside 5'-monophosphate phosphoribohydrolase LOG	NULL	NULL	NULL
Dr15318	NULL	NULL	NULL	NULL	NULL	NULL	NULL	NULL
Dr15324	NULL	NULL	NULL	NULL	NULL	NULL	NULL	NULL
Dr15338	GO:0009987	NULL	ethylene-responsive transcription factor	IPR001471|IPR016177	AP2/ERF domain|DNA-binding domain	GO:0003700|GO:0006355|GO:0003677	NULL	NULL
Dr15305	NULL	NULL	NULL	NULL	NULL	NULL	NULL	NULL
Dr15373	NULL	NULL	NULL	NULL	NULL	NULL	NULL	NULL
Dr24891	GO:0044765|GO:0022857	NULL	protein	NULL	NULL	NULL	NULL	NULL
Dr15422	NULL	NULL	NULL	IPR001128	Cytochrome P450	GO:0005506|GO:0016705|GO:0020037|GO:0055114	NULL	Reactome: REACT_13433
Dr24910	GO:0005739	NULL	orf186 gene product	NULL	NULL	NULL	NULL	NULL
Dr15450	GO:0035445|GO:0005452|GO:0005886|GO:0080139|GO:0016021|GO:0005739|GO:0006821|GO:0015701	NULL	boron transporter	IPR003020|IPR011531	Bicarbonate transporter, eukaryotic|Bicarbonate transporter, C-terminal	GO:0005452|GO:0006820|GO:0016020|GO:0016021	NULL	Reactome: REACT_15518
Dr15495	NULL	NULL	NULL	IPR000058|IPR002653	Zinc finger, AN1-type|Zinc finger, A20-type	GO:0008270|GO:0003677	NULL	NULL
Dr15474	GO:0016829	NULL	a chain structure of a three-domain sesquiterpene synthase: a prospective target for advanced biofuels production	IPR001906|IPR005630|IPR008930|IPR008949	Terpene synthase, N-terminal domain|Terpene synthase, metal-binding domain|Terpenoid cyclases/protein prenyltransferase alpha-alpha toroid|Terpenoid synthase	GO:0008152|GO:0010333|GO:0016829|GO:0000287	NULL	NULL
Dr15494	NULL	NULL	NULL	IPR000058|IPR002653|IPR006948|IPR015424|IPR015422	Zinc finger, AN1-type|Zinc finger, A20-type|Allinase, C-terminal|Pyridoxal phosphate-dependent transferase|Pyridoxal phosphate-dependent transferase, major region, subdomain 2	GO:0008270|GO:0003677|GO:0016846|GO:0003824|GO:0030170	NULL	NULL
Dr15511	GO:0005739|GO:0006200|GO:0005524|GO:0015417|GO:0005886|GO:0015846	EC:3.6.3.31	abc transporter cholesterol phospholipid flippase	IPR026082|IPR003439|IPR027417|IPR003593|IPR017871	ABC transporter A, ABCA|ABC transporter-like|P-loop containing nucleoside triphosphate hydrolase|AAA+ ATPase domain|ABC transporter, conserved site	GO:0005524|GO:0016887|GO:0000166|GO:0017111	NULL	NULL
Dr15573	NULL	NULL	NULL	IPR002213	UDP-glucuronosyl/UDP-glucosyltransferase	GO:0008152|GO:0016758	NULL	NULL
Dr15556	GO:0052689	EC:3.1.1.0	protein	IPR013094	Alpha/beta hydrolase fold-3	GO:0008152|GO:0016787	NULL	NULL
Dr15559	GO:0016491|GO:0016023	NULL	cytochrome p450	IPR001128|IPR002401|IPR017972	Cytochrome P450|Cytochrome P450, E-class, group I|Cytochrome P450, conserved site	GO:0005506|GO:0016705|GO:0020037|GO:0055114	NULL	Reactome: REACT_13433
Dr15562	GO:0016023|GO:0009055|GO:0004497|GO:0005506|GO:0020037|GO:0016705|GO:0009536|GO:0055114|GO:0006118	NULL	cytochrome p450 94a1-like	IPR001128|IPR002401	Cytochrome P450|Cytochrome P450, E-class, group I	GO:0005506|GO:0016705|GO:0020037|GO:0055114	NULL	Reactome: REACT_13433
Dr15565	GO:0043231|GO:0044444|GO:0003824	NULL	cytochrome p450 family protein	IPR001128	Cytochrome P450	GO:0005506|GO:0016705|GO:0020037|GO:0055114	NULL	Reactome: REACT_13433
Dr15566	NULL	NULL	NULL	IPR001128|IPR017972	Cytochrome P450|Cytochrome P450, conserved site	GO:0005506|GO:0016705|GO:0020037|GO:0055114	NULL	Reactome: REACT_13433
Dr15604	GO:0016023|GO:0005515|GO:0008152	NULL	urease accessory protein	NULL	NULL	NULL	NULL	NULL
Dr03739	GO:0003700|GO:0003677|GO:0006355|GO:0005667|GO:0045449	NULL	ap2 erf domain-containing transcription factor	IPR001471|IPR016177	AP2/ERF domain|DNA-binding domain	GO:0003700|GO:0006355|GO:0003677	NULL	NULL
Dr03742	NULL	NULL	NULL	NULL	NULL	NULL	NULL	NULL
Dr03780	NULL	NULL	NULL	NULL	NULL	NULL	NULL	NULL
Dr03778	NULL	NULL	NULL	NULL	NULL	NULL	NULL	NULL
Dr03746	GO:0003700|GO:0005739|GO:0006355|GO:0005667|GO:0045449	NULL	drought-inducible protein 1os	NULL	NULL	NULL	NULL	NULL
Dr03828	GO:0034227|GO:0005737	NULL	protein	IPR015221|IPR016155|IPR012675	Ubiquitin-related modifier 1|Molybdopterin synthase/thiamin biosynthesis sulphur carrier, beta-grasp|Beta-grasp domain	GO:0005737|GO:0034227	NULL	UniPathway: UPA00988
Dr03853	GO:0016772	NULL	protein	IPR000719|IPR001611|IPR013210|IPR025875|IPR011009|IPR013320|IPR003591|IPR008266	Protein kinase domain|Leucine-rich repeat|Leucine-rich repeat-containing N-terminal, type 2|Leucine rich repeat 4|Protein kinase-like domain|Concanavalin A-like lectin/glucanase, subgroup|Leucine-rich repeat, typical subtype|Tyrosine-protein kinase, active site	GO:0004672|GO:0005524|GO:0006468|GO:0005515|GO:0016772|GO:0004713	NULL	NULL
Dr03867	NULL	NULL	NULL	NULL	NULL	NULL	NULL	NULL
Dr03859	NULL	NULL	NULL	IPR015943	WD40/YVTN repeat-like-containing domain	GO:0005515	NULL	NULL
Dr03840	GO:0004713|GO:0006468|GO:0005524|GO:0016020|GO:0005739	EC:2.7.10.0	protein	IPR000719|IPR011009|IPR008266	Protein kinase domain|Protein kinase-like domain|Tyrosine-protein kinase, active site	GO:0004672|GO:0005524|GO:0006468|GO:0016772|GO:0004713	NULL	NULL
Dr03841	GO:0016772	NULL	probable lrr receptor-like serine threonine-protein kinase at4g08850-like	IPR001611|IPR013210|IPR025558|IPR025836|IPR001878	Leucine-rich repeat|Leucine-rich repeat-containing N-terminal, type 2|Domain of unknown function DUF4283|Zinc knuckle CX2CX4HX4C|Zinc finger, CCHC-type	GO:0005515|GO:0003676|GO:0008270	NULL	NULL
Dr03881	GO:0017111|GO:0016023|GO:0016020	EC:3.6.1.15	abc transporter g family member 28-like	IPR003439|IPR027417|IPR003593|IPR017871	ABC transporter-like|P-loop containing nucleoside triphosphate hydrolase|AAA+ ATPase domain|ABC transporter, conserved site	GO:0005524|GO:0016887|GO:0000166|GO:0017111	NULL	NULL
Dr15608	NULL	NULL	NULL	NULL	NULL	NULL	NULL	NULL
Dr15612	NULL	NULL	NULL	NULL	NULL	NULL	NULL	NULL
Dr15640	GO:0046872|GO:0003735|GO:0022627|GO:0005634|GO:0006412|GO:0042254	NULL	protein	IPR002906|IPR011332	Ribosomal protein S27a|Zinc-binding ribosomal protein	GO:0003735|GO:0005622|GO:0005840|GO:0006412	NULL	NULL
Dr15686	NULL	NULL	NULL	IPR002885|IPR011990	Pentatricopeptide repeat|Tetratricopeptide-like helical	GO:0005515	NULL	NULL
Dr15610	NULL	NULL	NULL	NULL	NULL	NULL	NULL	NULL
Dr15682	NULL	NULL	NULL	NULL	NULL	NULL	NULL	NULL
Dr15684	GO:0016301|GO:1901363|GO:0097159	NULL	receptor-like protein kinase hsl1	NULL	NULL	NULL	NULL	NULL
Dr15685	NULL	NULL	NULL	IPR004332|IPR018289	Transposase, MuDR, plant|MULE transposase domain	NULL	NULL	NULL
Dr15720	NULL	NULL	NULL	IPR016040|IPR002198|IPR002347|IPR020904	Short-chain dehydrogenase/reductase SDR|Glucose/ribitol dehydrogenase|NAD(P)-binding domain|Short-chain dehydrogenase/reductase, conserved site	GO:0008152|GO:0016491	NULL	NULL
Dr15732	GO:0030170|GO:0005829|GO:0016740|GO:0018826|GO:0006520	EC:4.4.1.11	o-succinylhomoserine sulfhydrylase	IPR000277|IPR015424|IPR015422	Cys/Met metabolism, pyridoxal phosphate-dependent enzyme|Pyridoxal phosphate-dependent transferase|Pyridoxal phosphate-dependent transferase, major region, subdomain 2	GO:0030170|GO:0003824	NULL	NULL
Dr15738	GO:0010332|GO:0010213|GO:0003684|GO:0010224|GO:0000724|GO:0017108|GO:0006294|GO:0005634|GO:0006308	NULL	dna excision repair protein ercc-1	IPR003311|IPR004579|IPR011335|IPR011525	AUX/IAA protein|DNA repair protein rad10|Restriction endonuclease type II-like|Aux/IAA-ARF-dimerisation	GO:0005634|GO:0006355|GO:0003684|GO:0004519|GO:0006281|GO:0046983	NULL	NULL
Dr15700	NULL	NULL	NULL	IPR024752	Myb/SANT-like domain	NULL	NULL	NULL
Dr15703	NULL	NULL	NULL	NULL	NULL	NULL	NULL	NULL
Dr24956	GO:0003676|GO:0005634|GO:0004535|GO:0051252	EC:3.1.13.4	ccr4-associated factor 1-6	IPR006941|IPR012337	Ribonuclease CAF1|Ribonuclease H-like domain	GO:0005634|GO:0003676	NULL	NULL
Dr15794	NULL	NULL	NULL	IPR001611|IPR013210|IPR025875|IPR003591	Leucine-rich repeat|Leucine-rich repeat-containing N-terminal, type 2|Leucine rich repeat 4|Leucine-rich repeat, typical subtype	GO:0005515	NULL	NULL
Dr15797	NULL	NULL	NULL	NULL	NULL	NULL	NULL	NULL
Dr15803	NULL	NULL	NULL	NULL	NULL	NULL	NULL	NULL
Dr15804	GO:0020037|GO:0016705|GO:0004497|GO:0005506|GO:0009055|GO:0055114|GO:0006118	NULL	flavonoid 3 5 -hydroxylase	IPR001128	Cytochrome P450	GO:0005506|GO:0016705|GO:0020037|GO:0055114	NULL	Reactome: REACT_13433
Dr15805	GO:0005488|GO:0016491	NULL	flavonoid 3 -hydroxylase	IPR001128|IPR002401|IPR017972	Cytochrome P450|Cytochrome P450, E-class, group I|Cytochrome P450, conserved site	GO:0005506|GO:0016705|GO:0020037|GO:0055114	NULL	Reactome: REACT_13433
Dr15767	NULL	NULL	NULL	NULL	NULL	NULL	NULL	NULL
Dr24963	NULL	NULL	NULL	NULL	NULL	NULL	NULL	NULL
Dr15843	NULL	NULL	NULL	IPR002902	Gnk2-homologous domain	NULL	NULL	NULL
Dr15844	GO:0003676|GO:0005622|GO:0009506|GO:0016567|GO:0010497|GO:0004842|GO:0016020|GO:0008270	EC:6.3.2.19	probable e3 ubiquitin-protein ligase ari8-like	IPR002902	Gnk2-homologous domain	NULL	NULL	NULL
Dr15853	NULL	NULL	NULL	NULL	NULL	NULL	NULL	NULL
Dr15824	NULL	NULL	NULL	NULL	NULL	NULL	NULL	NULL
Dr24983	GO:0035251|GO:0008152	NULL	udp-glycosyltransferase 73b3-like	IPR002213	UDP-glucuronosyl/UDP-glucosyltransferase	GO:0008152|GO:0016758	NULL	NULL
Dr15878	GO:0050592|GO:0016023|GO:0009055|GO:0005506|GO:0020037|GO:0047085|GO:0055114|GO:0006570|GO:0006118	EC:1.14.13.68|EC:1.14.13.42	cytochrome p450	IPR001128|IPR002401	Cytochrome P450|Cytochrome P450, E-class, group I	GO:0005506|GO:0016705|GO:0020037|GO:0055114	NULL	Reactome: REACT_13433
Dr15879	NULL	NULL	NULL	IPR001128|IPR002401	Cytochrome P450|Cytochrome P450, E-class, group I	GO:0005506|GO:0016705|GO:0020037|GO:0055114	NULL	Reactome: REACT_13433
Dr15880	GO:0020037|GO:0016705|GO:0004497|GO:0005506|GO:0009055|GO:0055114|GO:0006118	NULL	cytochrome p450	IPR001128|IPR002401	Cytochrome P450|Cytochrome P450, E-class, group I	GO:0005506|GO:0016705|GO:0020037|GO:0055114	NULL	Reactome: REACT_13433
Dr24993	GO:0050896|GO:0006468|GO:0004674|GO:0005524|GO:0044464|GO:0009069	EC:2.7.11.0	serine threonine protein kinase	IPR011009|IPR000719	Protein kinase-like domain|Protein kinase domain	GO:0016772|GO:0004672|GO:0005524|GO:0006468	NULL	NULL
Dr15906	NULL	NULL	NULL	NULL	NULL	NULL	NULL	NULL
Dr15917	NULL	NULL	NULL	IPR004265	Plant disease resistance response protein	NULL	NULL	NULL
Dr25000	NULL	NULL	NULL	IPR012967|IPR011991	Plant methyltransferase dimerisation|Winged helix-turn-helix DNA-binding domain	GO:0046983	NULL	NULL
Dr25007	NULL	NULL	NULL	NULL	NULL	NULL	NULL	NULL
Dr15949	GO:0044765|GO:0050896|GO:0071705|GO:0016020|GO:0005215	NULL	proton-dependent oligopeptide transport family protein	IPR000109|IPR016196	Proton-dependent oligopeptide transporter family|Major facilitator superfamily domain, general substrate transporter	GO:0005215|GO:0006810|GO:0016020	NULL	Reactome: REACT_15518|Reactome: REACT_19419
Dr15953	GO:0006810|GO:0016020	NULL	nitrate chlorate transporter	IPR000109|IPR016196	Proton-dependent oligopeptide transporter family|Major facilitator superfamily domain, general substrate transporter	GO:0005215|GO:0006810|GO:0016020	NULL	Reactome: REACT_15518|Reactome: REACT_19419
Dr15980	GO:0009654|GO:0005509|GO:0003968|GO:0015979|GO:0019898|GO:0006144|GO:0031379	EC:2.7.7.48	appr-1-p processing enzyme family protein	IPR002589	Macro domain	NULL	NULL	NULL
Dr16044	GO:0006457|GO:0016272|GO:0051082	NULL	prefoldin subunit 2	IPR027235|IPR002777|IPR014810|IPR009053	Prefoldin subunit 2|Prefoldin beta-like|Fcf2 pre-rRNA processing|Prefoldin	GO:0006457|GO:0016272|GO:0051082	NULL	NULL
Dr16049	GO:0006829|GO:0016020|GO:0008270|GO:0005385	NULL	zip transporter	NULL	NULL	NULL	NULL	NULL
Dr16054	GO:0009624|GO:0005886|GO:0071577|GO:0032440|GO:0016021|GO:0008270|GO:0005385|GO:0055114	EC:1.3.1.74	zip transporter	IPR003689	Zinc/iron permease	GO:0016020|GO:0030001|GO:0046873|GO:0055085	NULL	NULL
Dr16050	NULL	NULL	NULL	IPR001611	Leucine-rich repeat	GO:0005515	NULL	NULL
Dr16109	GO:0004328|GO:0005773|GO:0006568|GO:0046487	EC:3.5.1.49	formamidase	IPR004304	Acetamidase/Formamidase	GO:0008152|GO:0016811	NULL	NULL
Dr16199	GO:0005488|GO:0004518|GO:0090304|GO:0006974	NULL	exonuclease 1	IPR006084|IPR006086|IPR019974	XPG/Rad2 endonuclease|XPG-I domain|XPG conserved site	GO:0004518|GO:0006281|GO:0016788	NULL	NULL
Dr16227	NULL	NULL	NULL	NULL	NULL	NULL	NULL	NULL
Dr16229	GO:0045487|GO:0055114|GO:0052634|GO:0032940|GO:0016702|GO:0016023|GO:0005506	EC:1.13.11.0	gibberellin 2-oxidase	IPR005123|IPR027443	Oxoglutarate/iron-dependent dioxygenase|Isopenicillin N synthase-like	GO:0016491|GO:0016706|GO:0055114	NULL	NULL
Dr16236	GO:0044249|GO:1901137|GO:0044763|GO:0044710|GO:0016765|GO:0006807	EC:2.5.1.0	udp-n-acetylglucosamine 1-carboxyvinyltransferase	IPR005750|IPR001986|IPR013792	UDP-N-acetylglucosamine 1-carboxyvinyltransferase|Enolpyruvate transferase domain|RNA 3'-terminal phosphate cyclase/enolpyruvate transferase, alpha/beta	GO:0008760|GO:0019277|GO:0016765|GO:0003824	EC:2.5.1.7	KEGG: 00520+2.5.1.7|KEGG: 00550+2.5.1.7|MetaCyc: PWY-6386|MetaCyc: PWY-6387|UniPathway: UPA00219
Dr16265	NULL	NULL	NULL	NULL	NULL	NULL	NULL	NULL
Dr16274	NULL	NULL	NULL	IPR011685|IPR012463	LETM1-like|Ninja	NULL	NULL	NULL
Dr03919	GO:0048868|GO:0010025|GO:0000038|GO:0042335|GO:0009416|GO:0009409|GO:0009922|GO:0009826|GO:0005783|GO:0009923|GO:0042967	NULL	3-ketoacyl- synthase	IPR013601|IPR013747|IPR016039|IPR016038	FAE1/Type III polyketide synthase-like protein|3-Oxoacyl-[acyl-carrier-protein (ACP)] synthase III C-terminal|Thiolase-like|Thiolase-like, subgroup	GO:0006633|GO:0016020|GO:0016747|GO:0008610|GO:0003824|GO:0008152	EC:2.3.1.199|EC:2.3.1.180	KEGG: 00062+2.3.1.199|MetaCyc: PWY-5080|MetaCyc: PWY-6433|MetaCyc: PWY-7036|UniPathway: UPA00094|KEGG: 00061+2.3.1.180|MetaCyc: PWY-4381|MetaCyc: PWY-6519|UniPathway: UPA00094
Dr03920	NULL	NULL	NULL	NULL	NULL	NULL	NULL	NULL
Dr03947	GO:0016023	NULL	protein	IPR001680|IPR017986|IPR015943|IPR019775	WD40 repeat|WD40-repeat-containing domain|WD40/YVTN repeat-like-containing domain|WD40 repeat, conserved site	GO:0005515	NULL	NULL
Dr03949	NULL	NULL	NULL	IPR001680|IPR013720|IPR017986|IPR015943|IPR006594|IPR019775	WD40 repeat|LisH dimerisation motif, subgroup|WD40-repeat-containing domain|WD40/YVTN repeat-like-containing domain|LisH dimerisation motif|WD40 repeat, conserved site	GO:0005515	NULL	NULL
Dr03945	NULL	NULL	NULL	NULL	NULL	NULL	NULL	NULL
Dr03938	GO:1901363|GO:0008152|GO:0097159	NULL	retrotransposon unclassified	NULL	NULL	NULL	NULL	NULL
Dr03954	GO:0016717|GO:0006952|GO:0051707|GO:0006631|GO:0008610|GO:0046872|GO:0009507	EC:1.14.19.0	stearoyl-acyl-carrier protein desaturase	IPR005067|IPR009078|IPR012348	Fatty acid desaturase, type 2|Ferritin-like superfamily|Ribonucleotide reductase-related	GO:0006631|GO:0045300|GO:0055114|GO:0016491	EC:1.14.19.2	KEGG: 00061+1.14.19.2|MetaCyc: PWY-5147|UniPathway: UPA00199|Reactome: REACT_1698
Dr03958	NULL	NULL	NULL	NULL	NULL	NULL	NULL	NULL
Dr16366	NULL	NULL	NULL	NULL	NULL	NULL	NULL	NULL
Dr16409	GO:0016023|GO:0009987	NULL	prefoldin subunit	IPR002777|IPR009053	Prefoldin beta-like|Prefoldin	GO:0006457|GO:0016272|GO:0051082	NULL	NULL
Dr16379	NULL	NULL	NULL	NULL	NULL	NULL	NULL	NULL
Dr16385	GO:0044464|GO:0008152|GO:0008236	NULL	xylem serine proteinase 1	IPR015500|IPR000209	Peptidase S8, subtilisin-related|Peptidase S8/S53 domain	GO:0004252|GO:0006508	NULL	NULL
Dr16386	GO:0016787	NULL	subtilisin-like serine protease	IPR015500|IPR000209|IPR023828	Peptidase S8, subtilisin-related|Peptidase S8/S53 domain|Peptidase S8, subtilisin, Ser-active site	GO:0004252|GO:0006508	NULL	NULL
Dr16389	NULL	NULL	NULL	NULL	NULL	NULL	NULL	NULL
Dr16341	NULL	NULL	NULL	IPR022212|IPR025486	Protein of unknown function DUF3741|Domain of unknown function DUF4378	NULL	NULL	NULL
Dr16437	GO:0050896|GO:0044464|GO:0016020	NULL	protein	IPR016196	Major facilitator superfamily domain, general substrate transporter	NULL	NULL	NULL
Dr16443	GO:0043168|GO:0032559|GO:0032550	NULL	nbs-lrr resistance protein	NULL	NULL	NULL	NULL	NULL
Dr16472	GO:0004721|GO:0006468|GO:0005524|GO:0004674|GO:0005739|GO:0006470|GO:0009069	EC:3.1.3.16|EC:2.7.11.0	protein phosphatase 2c 51	IPR015655|IPR000719|IPR011009|IPR002290|IPR008271	Protein phosphatase 2C|Protein kinase domain|Protein kinase-like domain|Serine/threonine- / dual specificity protein kinase, catalytic domain|Serine/threonine-protein kinase, active site	GO:0004672|GO:0005524|GO:0006468|GO:0016772|GO:0004674	NULL	NULL
Dr16521	GO:0005739	NULL	pentatricopeptide repeat-containing protein	NULL	NULL	NULL	NULL	NULL
Dr16524	NULL	NULL	NULL	NULL	NULL	NULL	NULL	NULL
Dr16527	GO:0005739|GO:0044446	NULL	probable mitochondrial-processing peptidase subunit beta-like	IPR011237	Peptidase M16 domain	GO:0046872	NULL	NULL
Dr25073	NULL	NULL	NULL	NULL	NULL	NULL	NULL	NULL
Dr25083	GO:0009987|GO:0008152	NULL	s-adenosyl-l-homocysteine hydrolase	IPR000043|IPR015878|IPR016040	Adenosylhomocysteinase|S-adenosyl-L-homocysteine hydrolase, NAD binding domain|NAD(P)-binding domain	GO:0004013|GO:0006730	EC:3.3.1.1	KEGG: 00270+3.3.1.1|MetaCyc: PWY-5041|UniPathway: UPA00314
Dr16585	GO:0008289|GO:0016023|GO:0006869	NULL	cortical cell delineating protein expressed	IPR027923|IPR016140	Hydrophobic seed protein|Bifunctional inhibitor/plant lipid transfer protein/seed storage helical domain	NULL	NULL	NULL
Dr16588	GO:0016023	NULL	qltg3-1	IPR027923|IPR016140	Hydrophobic seed protein|Bifunctional inhibitor/plant lipid transfer protein/seed storage helical domain	NULL	NULL	NULL
Dr16589	NULL	NULL	NULL	IPR027923|IPR016140	Hydrophobic seed protein|Bifunctional inhibitor/plant lipid transfer protein/seed storage helical domain	NULL	NULL	NULL
Dr16591	NULL	NULL	NULL	IPR027923|IPR016140	Hydrophobic seed protein|Bifunctional inhibitor/plant lipid transfer protein/seed storage helical domain	NULL	NULL	NULL
Dr16598	GO:0006355	NULL	scl1 protein	IPR005202	Transcription factor GRAS	NULL	NULL	NULL
Dr16557	GO:0005794|GO:0032259|GO:0008168	EC:2.1.1.0	probable methyltransferase pmt15-like	IPR001128|IPR004159	Cytochrome P450|Putative S-adenosyl-L-methionine-dependent methyltransferase	GO:0005506|GO:0016705|GO:0020037|GO:0055114|GO:0008168	EC:2.1.1.-	Reactome: REACT_13433|KEGG: 00130+2.1.1.-|KEGG: 00253+2.1.1.-|KEGG: 00270+2.1.1.-|KEGG: 00340+2.1.1.-|KEGG: 00350+2.1.1.-|KEGG: 00360+2.1.1.-|KEGG: 00380+2.1.1.-|KEGG: 00450+2.1.1.-|KEGG: 00522+2.1.1.-|KEGG: 00624+2.1.1.-|KEGG: 00627+2.1.1.-|KEGG: 00860+2.1.1.-|KEGG: 00940+2.1.1.-|KEGG: 00941+2.1.1.-|KEGG: 00942+2.1.1.-|KEGG: 00945+2.1.1.-|KEGG: 00950+2.1.1.-|KEGG: 00981+2.1.1.-
Dr16587	GO:0016023	NULL	qltg3-1	IPR027923|IPR016140	Hydrophobic seed protein|Bifunctional inhibitor/plant lipid transfer protein/seed storage helical domain	NULL	NULL	NULL
Dr16592	NULL	NULL	NULL	NULL	NULL	NULL	NULL	NULL
Dr16673	GO:0006468|GO:0004674|GO:0009536|GO:0005524|GO:0004713|GO:0000165|GO:0009069	EC:2.7.11.0|EC:2.7.10.0	probable receptor-like protein kinase at5g18500-like	IPR000719|IPR011009|IPR002290|IPR017441|IPR008271	Protein kinase domain|Protein kinase-like domain|Serine/threonine- / dual specificity protein kinase, catalytic domain|Protein kinase, ATP binding site|Serine/threonine-protein kinase, active site	GO:0004672|GO:0005524|GO:0006468|GO:0016772|GO:0004674	NULL	NULL
Dr16686	GO:0016023	NULL	pectin acetylesterase	IPR004963	Protein notum homologue	NULL	EC:3.-.-.-	KEGG: 00231+3.-.-.-|KEGG: 00563+3.-.-.-|KEGG: 00983+3.-.-.-
Dr16694	NULL	NULL	NULL	NULL	NULL	NULL	NULL	NULL
Dr16700	GO:0044444|GO:0043231	NULL	pentatricopeptide repeat-containing protein	IPR002885	Pentatricopeptide repeat	NULL	NULL	NULL
Dr16705	NULL	NULL	NULL	IPR002885|IPR011990	Pentatricopeptide repeat|Tetratricopeptide-like helical	GO:0005515	NULL	NULL
Dr16709	NULL	NULL	NULL	NULL	NULL	NULL	NULL	NULL
Dr16679	NULL	NULL	NULL	IPR002885	Pentatricopeptide repeat	NULL	NULL	NULL
Dr16706	NULL	NULL	NULL	IPR002885	Pentatricopeptide repeat	NULL	NULL	NULL
Dr16711	NULL	NULL	NULL	IPR001680|IPR017986|IPR015943	WD40 repeat|WD40-repeat-containing domain|WD40/YVTN repeat-like-containing domain	GO:0005515	NULL	NULL
Dr25113	NULL	NULL	NULL	IPR002885	Pentatricopeptide repeat	NULL	NULL	NULL
Dr16720	NULL	NULL	NULL	NULL	NULL	NULL	NULL	NULL
Dr25125	GO:0005840|GO:0003723|GO:0008152|GO:0005739	NULL	ribosomal protein s13	NULL	NULL	NULL	NULL	NULL
Dr16726	GO:0044763|GO:0005794|GO:0016192|GO:0016020	NULL	golgi snare 12 protein	NULL	NULL	NULL	NULL	NULL
Dr16722	NULL	NULL	NULL	NULL	NULL	NULL	NULL	NULL
Dr16757	GO:0017111	EC:3.6.1.15	multidrug pheromone mdr abc transporter family	IPR001140|IPR011527	ABC transporter, transmembrane domain|ABC transporter type 1, transmembrane domain	GO:0005524|GO:0006810|GO:0016021|GO:0042626|GO:0055085	NULL	NULL
Dr16758	GO:0042626|GO:0016020|GO:0006810	NULL	multidrug resistance protein	IPR003439|IPR001140|IPR027417|IPR011527|IPR011042|IPR003593|IPR017871	ABC transporter-like|ABC transporter, transmembrane domain|P-loop containing nucleoside triphosphate hydrolase|ABC transporter type 1, transmembrane domain|Six-bladed beta-propeller, TolB-like|AAA+ ATPase domain|ABC transporter, conserved site	GO:0005524|GO:0016887|GO:0006810|GO:0016021|GO:0042626|GO:0055085|GO:0000166|GO:0017111	NULL	NULL
Dr16769	GO:0016023|GO:0043232|GO:0016020|GO:0005634|GO:0016043|GO:0044446|GO:0071944	NULL	formin-like protein 6-like	IPR027643|IPR015425|IPR001878|IPR023393	Formin-like family, viridiplantae|Formin, FH2 domain|Zinc finger, CCHC-type|START-like domain	GO:0005884|GO:0045010|GO:0003676|GO:0008270	NULL	NULL
Dr16733	GO:0046872|GO:0050896|GO:0005618|GO:0005576	NULL	germin-like protein	IPR006045|IPR011051|IPR014710|IPR001929|IPR019780	Cupin 1|Germin|RmlC-like cupin domain|RmlC-like jelly roll fold|Germin, manganese binding site	GO:0045735|GO:0030145	NULL	NULL
Dr16736	GO:0044464	NULL	germin-like protein	IPR006045|IPR011051|IPR014710|IPR001929|IPR019780	Cupin 1|Germin|RmlC-like cupin domain|RmlC-like jelly roll fold|Germin, manganese binding site	GO:0045735|GO:0030145	NULL	NULL
Dr16739	GO:0046872|GO:0050896|GO:0005618|GO:0005576	NULL	germin-like protein	IPR006045|IPR011051|IPR014710|IPR001929|IPR019780	Cupin 1|Germin|RmlC-like cupin domain|RmlC-like jelly roll fold|Germin, manganese binding site	GO:0045735|GO:0030145	NULL	NULL
Dr16740	GO:0046872|GO:0050896|GO:0005618|GO:0005576	NULL	germin-like protein	IPR011051|IPR014710	RmlC-like cupin domain|RmlC-like jelly roll fold	NULL	NULL	NULL
Dr16752	GO:0016310|GO:0004672|GO:0016020|GO:0005739|GO:0000166	NULL	brassinosteroid insensitive 1-associated receptor kinase 1 expressed	IPR000719|IPR023410|IPR001611|IPR013210|IPR011009|IPR013320|IPR000308|IPR002290|IPR017441|IPR023409	Protein kinase domain|14-3-3 domain|Leucine-rich repeat|Leucine-rich repeat-containing N-terminal, type 2|14-3-3 protein|Protein kinase-like domain|Concanavalin A-like lectin/glucanase, subgroup|Serine/threonine- / dual specificity protein kinase, catalytic domain|Protein kinase, ATP binding site|14-3-3 protein, conserved site	GO:0004672|GO:0005524|GO:0006468|GO:0005515|GO:0016772|GO:0019904	NULL	NULL
Dr16756	NULL	NULL	NULL	NULL	NULL	NULL	NULL	NULL
Dr16750	NULL	NULL	NULL	IPR009741	Protein of unknown function DUF1313	NULL	NULL	NULL
Dr16784	NULL	NULL	NULL	IPR001128|IPR002401	Cytochrome P450|Cytochrome P450, E-class, group I	GO:0005506|GO:0016705|GO:0020037|GO:0055114	NULL	Reactome: REACT_13433
Dr16789	NULL	NULL	NULL	NULL	NULL	NULL	NULL	NULL
Dr16775	GO:0004519|GO:0090304|GO:0016740|GO:0043167|GO:0000166	NULL	replication-associated protein	IPR022690	Geminivirus AL1 replication-associated protein, catalytic domain	GO:0006260	NULL	NULL
Dr03971	GO:0030170|GO:0009058|GO:0008483	EC:2.6.1.0	kynurenine-oxoglutarate transaminase	IPR004839|IPR015424|IPR015421	Aminotransferase, class I/classII|Pyridoxal phosphate-dependent transferase|Pyridoxal phosphate-dependent transferase, major region, subdomain 1	GO:0009058|GO:0030170|GO:0003824	NULL	NULL
Dr03976	NULL	NULL	NULL	NULL	NULL	NULL	NULL	NULL
Dr03980	NULL	NULL	NULL	NULL	NULL	NULL	NULL	NULL
Dr03992	GO:0003735|GO:0003723|GO:0015935|GO:0006412|GO:0042254	NULL	40s ribosomal protein s5	IPR000235|IPR023798	Ribosomal protein S5/S7|Ribosomal protein S7 domain	GO:0006412	NULL	NULL
Dr03994	NULL	NULL	NULL	IPR000719|IPR011009|IPR008271	Protein kinase domain|Protein kinase-like domain|Serine/threonine-protein kinase, active site	GO:0004672|GO:0005524|GO:0006468|GO:0016772|GO:0004674	NULL	NULL
Dr03997	NULL	NULL	NULL	NULL	NULL	NULL	NULL	NULL
Dr04000	NULL	NULL	NULL	NULL	NULL	NULL	NULL	NULL
Dr03999	NULL	NULL	NULL	NULL	NULL	NULL	NULL	NULL
Dr04008	NULL	NULL	NULL	NULL	NULL	NULL	NULL	NULL
Dr25155	GO:0016787	NULL	replication-associated protein	NULL	NULL	NULL	NULL	NULL
Dr16799	GO:0016985|GO:0006000|GO:0006013|GO:0006080	EC:3.2.1.78	mannan endo- -beta-mannosidase 5	IPR001547|IPR017853|IPR013781	Glycoside hydrolase, family 5|Glycoside hydrolase, superfamily|Glycoside hydrolase, catalytic domain	GO:0004553|GO:0005975|GO:0003824	NULL	NULL
Dr16803	GO:0006351	NULL	nac protein 1	IPR003441	NAC domain	GO:0003677|GO:0006355	NULL	NULL
Dr16817	GO:0032550|GO:0050789|GO:0044763|GO:0043168|GO:0005739|GO:0046872|GO:0005543|GO:0032559	NULL	regulator of chromosome condensation protein	IPR000408|IPR013591|IPR009091	Regulator of chromosome condensation, RCC1|Brevis radix (BRX) domain|Regulator of chromosome condensation 1/beta-lactamase-inhibitor protein II	NULL	NULL	NULL
Dr25174	GO:0009273|GO:0009058|GO:0016881|GO:0000166|GO:0016043|GO:0005737	EC:6.3.2.0	udp-n-acetylmuramoyl-l-alanyl-d-glutamate-- 6-diaminopimelate ligase	IPR013221	Mur ligase, central	GO:0005524|GO:0009058	NULL	UniPathway: UPA00219
Dr16848	NULL	NULL	NULL	NULL	NULL	NULL	NULL	NULL
Dr16920	NULL	NULL	NULL	NULL	NULL	NULL	NULL	NULL
Dr16984	GO:0016491|GO:0005488	NULL	cytochrome p450	IPR001128|IPR002403|IPR017972	Cytochrome P450|Cytochrome P450, E-class, group IV|Cytochrome P450, conserved site	GO:0005506|GO:0016705|GO:0020037|GO:0055114|GO:0004497	NULL	Reactome: REACT_13433
Dr16991	NULL	NULL	NULL	IPR001487	Bromodomain	GO:0005515	NULL	NULL
Dr16873	GO:0051287|GO:0016023|GO:0003979|GO:0005618|GO:0005634|GO:0005829|GO:0055114|GO:0005982|GO:0005985|GO:0009117	EC:1.1.1.22	udp-glucose 6- expressed	IPR017476|IPR028356|IPR014026|IPR014027|IPR001732|IPR008927|IPR016040	UDP-glucose/GDP-mannose dehydrogenase|UDP-glucose 6-dehydrogenase, eukaryotic type|UDP-glucose/GDP-mannose dehydrogenase, dimerisation|UDP-glucose/GDP-mannose dehydrogenase, C-terminal|UDP-glucose/GDP-mannose dehydrogenase, N-terminal|6-phosphogluconate dehydrogenase, C-terminal-like|NAD(P)-binding domain	GO:0016616|GO:0055114|GO:0003979|GO:0051287	EC:1.1.1.22	KEGG: 00040+1.1.1.22|KEGG: 00053+1.1.1.22|KEGG: 00500+1.1.1.22|KEGG: 00520+1.1.1.22|MetaCyc: PWY-3821|MetaCyc: PWY-4821|MetaCyc: PWY-6415|UniPathway: UPA00038
Dr16876	GO:0051287|GO:0016023|GO:0003979|GO:0005618|GO:0005634|GO:0005829|GO:0055114|GO:0005982|GO:0005985|GO:0009117	EC:1.1.1.22	udp-glucose 6- expressed	IPR017476|IPR028356|IPR014026|IPR014027|IPR001732|IPR008927|IPR016040	UDP-glucose/GDP-mannose dehydrogenase|UDP-glucose 6-dehydrogenase, eukaryotic type|UDP-glucose/GDP-mannose dehydrogenase, dimerisation|UDP-glucose/GDP-mannose dehydrogenase, C-terminal|UDP-glucose/GDP-mannose dehydrogenase, N-terminal|6-phosphogluconate dehydrogenase, C-terminal-like|NAD(P)-binding domain	GO:0016616|GO:0055114|GO:0003979|GO:0051287	EC:1.1.1.22	KEGG: 00040+1.1.1.22|KEGG: 00053+1.1.1.22|KEGG: 00500+1.1.1.22|KEGG: 00520+1.1.1.22|MetaCyc: PWY-3821|MetaCyc: PWY-4821|MetaCyc: PWY-6415|UniPathway: UPA00038
Dr16899	GO:0005488	NULL	div3b protein	IPR009057|IPR001005|IPR017877	Homeodomain-like|SANT/Myb domain|Myb-like domain	GO:0003677|GO:0003682	NULL	NULL
Dr16911	GO:0005488	NULL	bzip transcription factor bzip35	IPR004827	Basic-leucine zipper domain	GO:0003700|GO:0006355|GO:0043565	NULL	NULL
Dr16930	NULL	NULL	NULL	NULL	NULL	NULL	NULL	NULL
Dr25185	NULL	NULL	NULL	IPR001611|IPR013210|IPR003591	Leucine-rich repeat|Leucine-rich repeat-containing N-terminal, type 2|Leucine-rich repeat, typical subtype	GO:0005515	NULL	NULL
Dr17054	GO:0003723|GO:0008859|GO:0051252	EC:3.1.13.1	ribonuclease ii family protein	IPR012340	Nucleic acid-binding, OB-fold	NULL	NULL	NULL
Dr17055	GO:0016020|GO:0016023	NULL	auxin efflux carrier-like protein	IPR004776	Auxin efflux carrier	GO:0016021|GO:0055085	NULL	NULL
Dr17072	GO:0004324|GO:0009536|GO:0022900|GO:0006118	EC:1.18.1.2	ferredoxin--nadp+ reductase	IPR015701	Ferredoxin--NADP reductase	GO:0016491|GO:0055114	EC:1.18.1.2	KEGG: 00195+1.18.1.2|MetaCyc: PWY-101|MetaCyc: PWY-7230
Dr17083	NULL	NULL	NULL	IPR002182|IPR027417|IPR000767	NB-ARC|Disease resistance protein|P-loop containing nucleoside triphosphate hydrolase	GO:0043531|GO:0006952	NULL	NULL
Dr17097	GO:0019253|GO:0046872|GO:0009941|GO:0046686|GO:0004802|GO:0009570|GO:0009535|GO:0009651|GO:0006098|GO:0015976	EC:2.2.1.1	transketolase	IPR005474	Transketolase, N-terminal	NULL	EC:2.2.1.7	KEGG: 00730+2.2.1.7|KEGG: 00900+2.2.1.7|MetaCyc: PWY-6891|MetaCyc: PWY-6892|UniPathway: UPA00064
Dr17104	NULL	NULL	NULL	IPR019395	Transmembrane protein 161A/B	NULL	NULL	NULL
Dr17110	NULL	NULL	NULL	IPR016024|IPR011989|IPR000225	Armadillo-type fold|Armadillo-like helical|Armadillo	GO:0005488|GO:0005515	NULL	NULL
Dr17077	NULL	NULL	NULL	NULL	NULL	NULL	NULL	NULL
Dr17078	NULL	NULL	NULL	NULL	NULL	NULL	NULL	NULL
Dr25211	NULL	NULL	NULL	IPR001701|IPR008928|IPR012341	Glycoside hydrolase, family 9|Six-hairpin glycosidase-like|Six-hairpin glycosidase	GO:0004553|GO:0005975|GO:0003824	EC:3.2.1.4	KEGG: 00500+3.2.1.4|MetaCyc: PWY-6788|MetaCyc: PWY-6805
Dr25212	GO:0005975|GO:0016798|GO:0009536|GO:0071944	NULL	endoglucanase 3	IPR001701|IPR008928|IPR012341	Glycoside hydrolase, family 9|Six-hairpin glycosidase-like|Six-hairpin glycosidase	GO:0004553|GO:0005975|GO:0003824	EC:3.2.1.4	KEGG: 00500+3.2.1.4|MetaCyc: PWY-6788|MetaCyc: PWY-6805
Dr17184	NULL	NULL	NULL	IPR001680|IPR017986|IPR015943	WD40 repeat|WD40-repeat-containing domain|WD40/YVTN repeat-like-containing domain	GO:0005515	NULL	NULL
Dr17187	NULL	NULL	NULL	IPR011417|IPR008942|IPR014712|IPR013809	AP180 N-terminal homology (ANTH) domain|ENTH/VHS|Clathrin adaptor, phosphoinositide-binding, GAT-like|Epsin-like, N-terminal	GO:0005543|GO:0005545|GO:0030118|GO:0030276|GO:0048268	NULL	NULL
Dr17194	NULL	NULL	NULL	NULL	NULL	NULL	NULL	NULL
Dr17206	GO:0008152|GO:0035251	NULL	anthocyanidin -o-glucosyltransferase-like	IPR002213	UDP-glucuronosyl/UDP-glucosyltransferase	GO:0008152|GO:0016758	NULL	NULL
Dr25218	NULL	NULL	NULL	NULL	NULL	NULL	NULL	NULL
Dr17223	NULL	NULL	NULL	NULL	NULL	NULL	NULL	NULL
Dr17224	GO:0043168|GO:0032559|GO:0032550	NULL	nbs-lrr type resistance protein	IPR002182|IPR027417	NB-ARC|P-loop containing nucleoside triphosphate hydrolase	GO:0043531	NULL	NULL
Dr17225	NULL	NULL	NULL	IPR002182|IPR027417	NB-ARC|P-loop containing nucleoside triphosphate hydrolase	GO:0043531	NULL	NULL
Dr17259	NULL	NULL	NULL	IPR002100	Transcription factor, MADS-box	GO:0003677|GO:0046983	NULL	Reactome: REACT_21303
Dr17296	GO:0006073|GO:0048046|GO:0033946|GO:0005618|GO:0016762	EC:3.2.1.151|EC:2.4.1.207	xyloglucan endotransglycosylase hydrolase	IPR000757|IPR008985|IPR013320	Glycoside hydrolase, family 16|Concanavalin A-like lectin/glucanases superfamily|Concanavalin A-like lectin/glucanase, subgroup	GO:0004553|GO:0005975	NULL	NULL
Dr17318	NULL	NULL	NULL	NULL	NULL	NULL	NULL	NULL
Dr17322	GO:0005739	NULL	serine esterase family protein	IPR007751	Domain of unknown function DUF676, lipase-like	NULL	NULL	NULL
Dr17325	NULL	NULL	NULL	IPR000315	Zinc finger, B-box	GO:0005622|GO:0008270	NULL	NULL
Dr17327	GO:0007205|GO:0005886|GO:0016310|GO:0048364|GO:0048366|GO:0004143|GO:0009395|GO:0046486	EC:2.7.1.107	diacylglycerol kinase a-like	IPR000756|IPR001206|IPR016064	Diacylglycerol kinase, accessory domain|Diacylglycerol kinase, catalytic domain|ATP-NAD kinase-like domain	GO:0004143|GO:0007205|GO:0003951|GO:0008152	EC:2.7.1.107	KEGG: 00561+2.7.1.107|KEGG: 00564+2.7.1.107|MetaCyc: PWY-7039|Reactome: REACT_14797|Reactome: REACT_604
Dr17345	GO:0005488|GO:0016491	NULL	phenylalanine n-monooxygenase-like	IPR001128	Cytochrome P450	GO:0005506|GO:0016705|GO:0020037|GO:0055114	NULL	Reactome: REACT_13433
Dr17348	GO:0005488|GO:0016491	NULL	phenylalanine n-monooxygenase-like	IPR001128	Cytochrome P450	GO:0005506|GO:0016705|GO:0020037|GO:0055114	NULL	Reactome: REACT_13433
Dr17353	NULL	NULL	NULL	IPR001128	Cytochrome P450	GO:0005506|GO:0016705|GO:0020037|GO:0055114	NULL	Reactome: REACT_13433
Dr17365	GO:0006259|GO:0003676|GO:0003824	NULL	retrotransposon ty3-gypsy subclass	NULL	NULL	NULL	NULL	NULL
Dr17368	GO:0016023	NULL	expansin-like protein precursor	IPR007117|IPR009009|IPR014733|IPR007112	Expansin, cellulose-binding-like domain|RlpA-like double-psi beta-barrel domain|Barwin-like endoglucanase|Expansin/pollen allergen, DPBB domain	NULL	NULL	NULL
Dr17366	GO:0005737|GO:0006526|GO:0006810|GO:0016020|GO:0004042|GO:0005215|GO:0000051|GO:0042967	EC:2.3.1.1	uncharacterized protein	IPR004252|IPR014772	Probable transposase, Ptta/En/Spm, plant|Mammalian uncoordinated homology 13, domain 2	NULL	NULL	NULL
Dr04047	GO:0004540|GO:0006950|GO:0051252	NULL	ribonuclease t2	IPR001568|IPR018188	Ribonuclease T2-like|Ribonuclease T2, active site	GO:0003723|GO:0033897	NULL	NULL
Dr04016	GO:0008152|GO:0051213	NULL	2og-fe oxygenase family expressed	IPR027443	Isopenicillin N synthase-like	NULL	NULL	NULL
Dr04045	GO:0005739	NULL	ectonucleoside triphosphate diphosphohydrolase 1-like isoform 1	IPR000407	Nucleoside phosphatase GDA1/CD39	GO:0016787	NULL	NULL
Dr04103	NULL	NULL	NULL	NULL	NULL	NULL	NULL	NULL
Dr04092	GO:0003824	NULL	probable galactinol--sucrose galactosyltransferase 2-like	IPR008811|IPR017853|IPR013785	Glycosyl hydrolases 36|Glycoside hydrolase, superfamily|Aldolase-type TIM barrel	GO:0003824	NULL	NULL
Dr04085	NULL	NULL	NULL	NULL	NULL	NULL	NULL	NULL
Dr04080	NULL	NULL	NULL	NULL	NULL	NULL	NULL	NULL
Dr04099	GO:0004828|GO:0006434|GO:0005524|GO:0005737|GO:0006544|GO:0006563|GO:0006566	EC:6.1.1.11	seryl-trna synthetase	NULL	NULL	NULL	NULL	NULL
Dr04100	GO:0016020|GO:0016829	NULL	pectate lyase	IPR002022|IPR011050|IPR012334|IPR018082	Pectate lyase/Amb allergen|AmbAllergen|Pectin lyase fold/virulence factor|Pectin lyase fold	NULL	NULL	NULL
Dr04101	NULL	NULL	NULL	NULL	NULL	NULL	NULL	NULL
Dr04110	NULL	NULL	NULL	NULL	NULL	NULL	NULL	NULL
Dr04123	NULL	NULL	NULL	NULL	NULL	NULL	NULL	NULL
Dr04126	NULL	NULL	NULL	NULL	NULL	NULL	NULL	NULL
Dr04127	NULL	NULL	NULL	IPR004320	Protein of unknown function DUF241, plant	NULL	NULL	NULL
Dr04122	NULL	NULL	NULL	IPR001480	Bulb-type lectin domain	NULL	NULL	NULL
Dr04149	GO:0000159|GO:0007165|GO:0008601	NULL	protein phosphatase regulatory	IPR002554|IPR016024	Protein phosphatase 2A, regulatory B subunit, B56|Armadillo-type fold	GO:0000159|GO:0007165|GO:0008601|GO:0005488	NULL	Reactome: REACT_11045|Reactome: REACT_152|Reactome: REACT_383|Reactome: REACT_6900
Dr04175	GO:0016020	NULL	auxin efflux carrier component	IPR004776	Auxin efflux carrier	GO:0016021|GO:0055085	NULL	NULL
Dr04188	GO:0016020	NULL	uncharacterized membrane	NULL	NULL	NULL	NULL	NULL
Dr04204	GO:0009941|GO:0006754|GO:0005524|GO:0016820|GO:0015991|GO:0005773|GO:0033180|GO:0005886	EC:3.6.3.0	v-type proton atpase subunit b2	IPR000194|IPR004100|IPR027417|IPR020003|IPR022879	ATPase, F1/V1/A1 complex, alpha/beta subunit, nucleotide-binding domain|ATPase, F1 complex alpha/beta subunit, N-terminal domain|P-loop containing nucleoside triphosphate hydrolase|ATPase, alpha/beta subunit, nucleotide-binding domain, active site|V-type ATP synthase regulatory subunit B/beta	GO:0005524|GO:0015992|GO:0046034	EC:3.6.3.14	KEGG: 00190+3.6.3.14|KEGG: 00195+3.6.3.14|MetaCyc: PWY-7219
Dr04210	GO:0008270|GO:0005739|GO:0016021|GO:0019829|GO:0005524|GO:0000287|GO:0004012|GO:0006812|GO:0015917	EC:3.6.3.1	phospholipid-transporting atpase 4-like	IPR006539|IPR008250|IPR023214|IPR023299|IPR001757|IPR018303	Cation-transporting P-type ATPase, subfamily IV|P-type ATPase, A domain|Cation-transporting P-type ATPase|HAD-like domain|P-type ATPase, cytoplasmic domain N|P-type ATPase, phosphorylation site	GO:0000287|GO:0004012|GO:0005524|GO:0015914|GO:0016021|GO:0000166|GO:0046872|GO:0006812|GO:0019829	NULL	NULL
Dr04241	GO:0009536|GO:0010541|GO:0016021|GO:0010329|GO:0010540|GO:0010315|GO:0008559|GO:0006200|GO:0005886|GO:0005524|GO:0006855	EC:3.6.3.44	abc transporter b family member 8-like	IPR003439|IPR001140|IPR027417|IPR011527|IPR003593|IPR017871	ABC transporter-like|ABC transporter, transmembrane domain|P-loop containing nucleoside triphosphate hydrolase|ABC transporter type 1, transmembrane domain|AAA+ ATPase domain|ABC transporter, conserved site	GO:0005524|GO:0016887|GO:0006810|GO:0016021|GO:0042626|GO:0055085|GO:0000166|GO:0017111	NULL	NULL
Dr04282	GO:0050896|GO:0044763|GO:0004674|GO:0016023|GO:0000166|GO:0016310|GO:0016020|GO:0009069	EC:2.7.11.0	l-type lectin-domain containing receptor kinase -like	IPR001220|IPR008985|IPR013320	Legume lectin domain|Concanavalin A-like lectin/glucanases superfamily|Concanavalin A-like lectin/glucanase, subgroup	GO:0030246	NULL	NULL
Dr04298	GO:0044765|GO:0016021	NULL	sucrose transporter	IPR016196	Major facilitator superfamily domain, general substrate transporter	NULL	NULL	NULL
Dr04308	NULL	NULL	NULL	NULL	NULL	NULL	NULL	NULL
Dr04322	NULL	NULL	NULL	IPR002487	Transcription factor, K-box	GO:0003700|GO:0005634|GO:0006355	NULL	NULL
Dr04267	NULL	NULL	NULL	IPR006458	Ovate protein family, C-terminal	NULL	NULL	NULL
Dr04274	NULL	NULL	NULL	NULL	NULL	NULL	NULL	NULL
Dr17378	NULL	NULL	NULL	NULL	NULL	NULL	NULL	NULL
Dr17380	NULL	NULL	NULL	NULL	NULL	NULL	NULL	NULL
Dr17383	NULL	NULL	NULL	NULL	NULL	NULL	NULL	NULL
Dr17377	NULL	NULL	NULL	IPR004873	BURP domain	NULL	NULL	NULL
Dr25248	NULL	NULL	NULL	NULL	NULL	NULL	NULL	NULL
Dr25254	GO:0003964|GO:0016023|GO:0006278|GO:0003723|GO:0006397|GO:0005739	EC:2.7.7.49	maturase	IPR000477	Reverse transcriptase	GO:0003723|GO:0003964|GO:0006278	NULL	NULL
Dr17411	NULL	NULL	NULL	NULL	NULL	NULL	NULL	NULL
Dr17415	NULL	NULL	NULL	IPR002885	Pentatricopeptide repeat	NULL	NULL	NULL
Dr17438	GO:0046872|GO:0016491|GO:0016023|GO:0016020	NULL	cytochrome p450	IPR001128|IPR002401|IPR017972	Cytochrome P450|Cytochrome P450, E-class, group I|Cytochrome P450, conserved site	GO:0005506|GO:0016705|GO:0020037|GO:0055114	NULL	Reactome: REACT_13433
Dr17496	GO:0009987|GO:0006952|GO:0044710	NULL	isoflavone 2 -hydroxylase-like	IPR001128|IPR002401	Cytochrome P450|Cytochrome P450, E-class, group I	GO:0005506|GO:0016705|GO:0020037|GO:0055114	NULL	Reactome: REACT_13433
Dr17500	GO:0046872|GO:0016491	NULL	isoflavone 2 -hydroxylase-like	IPR001128|IPR002401|IPR017972	Cytochrome P450|Cytochrome P450, E-class, group I|Cytochrome P450, conserved site	GO:0005506|GO:0016705|GO:0020037|GO:0055114	NULL	Reactome: REACT_13433
Dr17501	GO:0046872|GO:0016491	NULL	cytochrome p450	IPR001128|IPR002401|IPR017972	Cytochrome P450|Cytochrome P450, E-class, group I|Cytochrome P450, conserved site	GO:0005506|GO:0016705|GO:0020037|GO:0055114	NULL	Reactome: REACT_13433
Dr17478	GO:0051287|GO:0016023|GO:0003979|GO:0005618|GO:0005634|GO:0005829|GO:0055114|GO:0005982|GO:0005985|GO:0009117	EC:1.1.1.22	udp-glucose 6- expressed	IPR017476|IPR028356|IPR014026|IPR014027|IPR001732|IPR008927|IPR016040	UDP-glucose/GDP-mannose dehydrogenase|UDP-glucose 6-dehydrogenase, eukaryotic type|UDP-glucose/GDP-mannose dehydrogenase, dimerisation|UDP-glucose/GDP-mannose dehydrogenase, C-terminal|UDP-glucose/GDP-mannose dehydrogenase, N-terminal|6-phosphogluconate dehydrogenase, C-terminal-like|NAD(P)-binding domain	GO:0016616|GO:0055114|GO:0003979|GO:0051287	EC:1.1.1.22	KEGG: 00040+1.1.1.22|KEGG: 00053+1.1.1.22|KEGG: 00500+1.1.1.22|KEGG: 00520+1.1.1.22|MetaCyc: PWY-3821|MetaCyc: PWY-4821|MetaCyc: PWY-6415|UniPathway: UPA00038
Dr17431	NULL	NULL	NULL	NULL	NULL	NULL	NULL	NULL
Dr17503	GO:0006952|GO:0051707|GO:0005488|GO:0019760|GO:0016491	NULL	cytochrome p450	IPR001128	Cytochrome P450	GO:0005506|GO:0016705|GO:0020037|GO:0055114	NULL	Reactome: REACT_13433
Dr17504	GO:0046872|GO:0016491	NULL	cytochrome p450	IPR001128|IPR002401|IPR017972	Cytochrome P450|Cytochrome P450, E-class, group I|Cytochrome P450, conserved site	GO:0005506|GO:0016705|GO:0020037|GO:0055114	NULL	Reactome: REACT_13433
Dr17436	GO:0004825|GO:0005524|GO:0000049|GO:0046686|GO:0005737|GO:0006431|GO:0006555	EC:6.1.1.10	methionyl-trna synthetase	IPR001128|IPR002547|IPR015413|IPR009080|IPR012340|IPR014729|IPR002401|IPR014758|IPR017972|IPR001412	Cytochrome P450|tRNA-binding domain|Methionyl/Leucyl tRNA synthetase|Cytochrome P450, E-class, group I|Aminoacyl-tRNA synthetase, class 1a, anticodon-binding|Nucleic acid-binding, OB-fold|Rossmann-like alpha/beta/alpha sandwich fold|Methionyl-tRNA synthetase|Cytochrome P450, conserved site|Aminoacyl-tRNA synthetase, class I, conserved site	GO:0005506|GO:0016705|GO:0020037|GO:0055114|GO:0000049|GO:0000166|GO:0004812|GO:0005524|GO:0006418|GO:0004825|GO:0005737|GO:0006431	EC:6.1.1.10	Reactome: REACT_13433|Reactome: REACT_71|KEGG: 00450+6.1.1.10|KEGG: 00970+6.1.1.10|Reactome: REACT_71
Dr25274	GO:0005739	NULL	pentatricopeptide repeat-containing	IPR005069	Nucleotide-diphospho-sugar transferase	NULL	NULL	NULL
Dr17517	NULL	NULL	NULL	NULL	NULL	NULL	NULL	NULL
Dr17521	GO:0003676|GO:0006468|GO:0005524|GO:0008270|GO:0004674|GO:0009069	EC:2.7.11.0	probable lrr receptor-like serine threonine-protein kinase at1g53430-like	IPR001245|IPR011009|IPR000719	Serine-threonine/tyrosine-protein kinase catalytic domain|Protein kinase-like domain|Protein kinase domain	GO:0004672|GO:0006468|GO:0016772|GO:0005524	NULL	NULL
Dr17510	NULL	NULL	NULL	NULL	NULL	NULL	NULL	NULL
Dr17513	NULL	NULL	NULL	NULL	NULL	NULL	NULL	NULL
Dr25284	GO:0008168	EC:2.1.1.0	orcinol o-methyltransferase	IPR001077	O-methyltransferase, family 2	GO:0008171	NULL	NULL
Dr17566	GO:0005852|GO:0005886|GO:0003743|GO:0008270|GO:0000166|GO:0005840|GO:0006446	NULL	initiation factor 3g	IPR024675	Eukaryotic translation initiation factor 3 subunit G, N-terminal	NULL	NULL	NULL
Dr17585	GO:0006412|GO:0009955|GO:0005730|GO:0003735|GO:0009965|GO:0010015|GO:0009507|GO:0008283|GO:0005773|GO:0022625|GO:0005886|GO:0008097|GO:0042254	NULL	60s ribosomal protein l5-like	IPR005485|IPR005484|IPR025607	Ribosomal protein L5 eukaryotic/L18 archaeal|Ribosomal protein L18/L5|Ribosomal protein L5 eukaryotic/L18 archaeal, C-terminal	GO:0003735|GO:0005622|GO:0005840|GO:0006412|GO:0008097	NULL	NULL
Dr17596	GO:0044464	NULL	nadp-dependent alkenal double bond reductase p2	IPR002085|IPR011032|IPR016040|IPR020843	Alcohol dehydrogenase superfamily, zinc-type|GroES (chaperonin 10)-like|NAD(P)-binding domain|Polyketide synthase, enoylreductase	GO:0008270|GO:0016491|GO:0055114|GO:0016747	NULL	NULL
Dr17609	NULL	NULL	NULL	NULL	NULL	NULL	NULL	NULL
Dr17654	GO:0044763|GO:0016023|GO:0043190|GO:0044707|GO:0042626|GO:0060918|GO:0005524|GO:0009733	NULL	multidrug pheromone mdr abc transporter family	IPR003439|IPR001140|IPR027417|IPR011527|IPR003593|IPR017871	ABC transporter-like|ABC transporter, transmembrane domain|P-loop containing nucleoside triphosphate hydrolase|ABC transporter type 1, transmembrane domain|AAA+ ATPase domain|ABC transporter, conserved site	GO:0005524|GO:0016887|GO:0006810|GO:0016021|GO:0042626|GO:0055085|GO:0000166|GO:0017111	NULL	NULL
Dr17640	GO:0006810|GO:0044699|GO:0016020|GO:0000166|GO:0005215|GO:0016887|GO:0009987	EC:3.6.1.3	protein	IPR003439|IPR013525|IPR001890|IPR013581|IPR027417|IPR003593	ABC transporter-like|ABC-2 type transporter|RNA-binding, CRM domain|Plant PDR ABC transporter associated|P-loop containing nucleoside triphosphate hydrolase|AAA+ ATPase domain	GO:0005524|GO:0016887|GO:0016020|GO:0003723|GO:0000166|GO:0017111	NULL	NULL
Dr17641	GO:0044699|GO:0016020|GO:0000166|GO:0016887|GO:0009987	EC:3.6.1.3	protein	IPR003439|IPR013525|IPR013581|IPR026960|IPR027417|IPR003593	ABC transporter-like|ABC-2 type transporter|Plant PDR ABC transporter associated|Reverse transcriptase zinc-binding domain|P-loop containing nucleoside triphosphate hydrolase|AAA+ ATPase domain	GO:0005524|GO:0016887|GO:0016020|GO:0000166|GO:0017111	NULL	NULL
Dr17688	NULL	NULL	NULL	NULL	NULL	NULL	NULL	NULL
Dr17696	NULL	NULL	NULL	NULL	NULL	NULL	NULL	NULL
Dr17695	NULL	NULL	NULL	NULL	NULL	NULL	NULL	NULL
Dr04350	NULL	NULL	NULL	NULL	NULL	NULL	NULL	NULL
Dr04400	NULL	NULL	NULL	NULL	NULL	NULL	NULL	NULL
Dr04420	NULL	NULL	NULL	NULL	NULL	NULL	NULL	NULL
Dr04362	GO:0004553|GO:0005975|GO:0016023	EC:3.2.1.0	beta-glucosidase 5-like isoform 1	IPR001360|IPR005162|IPR026960|IPR017853|IPR013781	Glycoside hydrolase, family 1|Retrotransposon gag domain|Reverse transcriptase zinc-binding domain|Glycoside hydrolase, superfamily|Glycoside hydrolase, catalytic domain	GO:0004553|GO:0005975|GO:0003824	NULL	NULL
Dr04366	GO:0048731|GO:0050789|GO:0016604|GO:0097159|GO:0009791|GO:1901363|GO:0009639	NULL	pre-mrna-splicing factor sf2	IPR000504|IPR012677	RNA recognition motif domain|Nucleotide-binding, alpha-beta plait	GO:0003676|GO:0000166	NULL	NULL
Dr04496	GO:0010044|GO:0005886	NULL	protein	IPR005226	Conserved hypothetical protein CHP00245	NULL	NULL	NULL
Dr04484	GO:0008152|GO:0008236	NULL	xylem serine proteinase 1	IPR010259	Proteinase inhibitor I9	GO:0004252|GO:0042802|GO:0043086	NULL	NULL
Dr04491	NULL	NULL	NULL	NULL	NULL	NULL	NULL	NULL
Dr04525	GO:0016787	NULL	subtilisin-like protease sdd1-like	IPR015500|IPR000209|IPR003137|IPR010259|IPR023827|IPR022398|IPR023828	Peptidase S8, subtilisin-related|Peptidase S8/S53 domain|Protease-associated domain, PA|Proteinase inhibitor I9|Peptidase S8, subtilisin, Asp-active site|Peptidase S8, subtilisin, His-active site|Peptidase S8, subtilisin, Ser-active site	GO:0004252|GO:0006508|GO:0042802|GO:0043086	NULL	NULL
Dr04540	GO:0016829	NULL	lactoylglutathione lyase	IPR001140|IPR025870|IPR011527	ABC transporter, transmembrane domain|Glyoxalase-like domain|ABC transporter type 1, transmembrane domain	GO:0005524|GO:0006810|GO:0016021|GO:0042626|GO:0055085	NULL	NULL
Dr17710	GO:0005783	NULL	vacuolar protein sorting-associated	IPR026847|IPR004252	Vacuolar protein sorting-associated protein 13|Probable transposase, Ptta/En/Spm, plant	NULL	NULL	NULL
Dr17707	GO:0003746|GO:0005739|GO:0005524|GO:0006184|GO:0003924|GO:0046686|GO:0005525|GO:0005840|GO:0006448	NULL	elongation factor g	IPR000795|IPR000640|IPR004161|IPR005517|IPR009022|IPR009000|IPR027417|IPR020568|IPR014721|IPR005225|IPR004540	Elongation factor, GTP-binding domain|Translation elongation factor EFG, V domain|Translation elongation factor EFTu/EF1A, domain 2|Translation elongation factor EFG/EF2, domain IV|Elongation factor G, III-V domain|Translation protein, beta-barrel domain|P-loop containing nucleoside triphosphate hydrolase|Ribosomal protein S5 domain 2-type fold|Ribosomal protein S5 domain 2-type fold, subgroup|Sm…	GO:0003924|GO:0005525|GO:0003746|GO:0005622|GO:0006414	NULL	NULL
Dr17715	NULL	NULL	NULL	NULL	NULL	NULL	NULL	NULL
Dr17717	NULL	NULL	NULL	NULL	NULL	NULL	NULL	NULL
Dr17718	GO:0015030|GO:0051567|GO:0009816|GO:0010529|GO:0005719|GO:0035197|GO:0030422|GO:0006342|GO:0005737|GO:0005730|GO:0006306|GO:0048481	NULL	protein argonaute 4	NULL	NULL	NULL	NULL	NULL
Dr25344	GO:0008152|GO:0008168	EC:2.1.1.0	caffeic acid o-methyltransferase	IPR001077	O-methyltransferase, family 2	GO:0008171	NULL	NULL
Dr17731	GO:0006259|GO:0046872|GO:0016491|GO:0003676	NULL	retrotransposon unclassified	NULL	NULL	NULL	NULL	NULL
Dr25351	GO:0005488|GO:0016491	NULL	flavonoid 3 -hydroxylase	IPR001128	Cytochrome P450	GO:0005506|GO:0016705|GO:0020037|GO:0055114	NULL	Reactome: REACT_13433
Dr17742	NULL	NULL	NULL	IPR001611	Leucine-rich repeat	GO:0005515	NULL	NULL
Dr17743	NULL	NULL	NULL	NULL	NULL	NULL	NULL	NULL
Dr17772	NULL	NULL	NULL	NULL	NULL	NULL	NULL	NULL
Dr17761	GO:0006468|GO:0005524|GO:0004674|GO:0009069	EC:2.7.11.0	high mobility group b protein 7-like	IPR009071	High mobility group box domain	NULL	NULL	NULL
Dr17798	NULL	NULL	NULL	IPR001128	Cytochrome P450	GO:0005506|GO:0016705|GO:0020037|GO:0055114	NULL	Reactome: REACT_13433
Dr17799	NULL	NULL	NULL	IPR001128	Cytochrome P450	GO:0005506|GO:0016705|GO:0020037|GO:0055114	NULL	Reactome: REACT_13433
Dr17801	NULL	NULL	NULL	NULL	NULL	NULL	NULL	NULL
Dr17803	GO:0005874|GO:0051258|GO:0006184|GO:0007017|GO:0003924|GO:0005200|GO:0005737|GO:0005525	NULL	alpha-tubulin 2	IPR000217|IPR003008|IPR004314	Tubulin|Tubulin/FtsZ, GTPase domain|Domain of unknown function DUF239	GO:0005874|GO:0007017	NULL	NULL
Dr17810	GO:0005730|GO:0009941|GO:0005773|GO:0015865|GO:0005743|GO:0005507|GO:0005886|GO:0005618|GO:0055085|GO:0016021|GO:0005215	NULL	atp adp translocator	IPR018108|IPR023395|IPR002067|IPR002113	Mitochondrial substrate/solute carrier|Mitochondrial carrier protein|Adenine nucleotide translocator 1|Mitochondrial carrier domain	GO:0055085|GO:0005215|GO:0005743|GO:0006810	NULL	NULL
Dr17811	NULL	NULL	NULL	NULL	NULL	NULL	NULL	NULL
Dr17815	NULL	NULL	NULL	IPR013171|IPR016193	Cytidine/deoxycytidylate deaminase, zinc-binding domain|Cytidine deaminase-like	GO:0004126|GO:0008270|GO:0009972|GO:0003824	EC:3.5.4.5	KEGG: 00240+3.5.4.5|KEGG: 00983+3.5.4.5|MetaCyc: PWY-6556|MetaCyc: PWY-7181|MetaCyc: PWY-7193|MetaCyc: PWY-7199
Dr17816	GO:0009877|GO:0016157|GO:0009058|GO:0005985|GO:0005982	EC:2.4.1.13	sucrose synthase	IPR000368	Sucrose synthase	GO:0005985	EC:2.4.1.13	KEGG: 00500+2.4.1.13|MetaCyc: PWY-3801|MetaCyc: PWY-3821|MetaCyc: PWY-621
Dr17823	GO:0006979|GO:0071704|GO:0044710|GO:0009651|GO:0009536|GO:0044237	NULL	tocopherol cyclase	IPR025893	Tocopherol cyclase	GO:0009976	NULL	UniPathway: UPA00160
Dr17817	NULL	NULL	NULL	IPR002885	Pentatricopeptide repeat	NULL	NULL	NULL
Dr04570	NULL	NULL	NULL	NULL	NULL	NULL	NULL	NULL
Dr04587	NULL	NULL	NULL	NULL	NULL	NULL	NULL	NULL
Dr04560	GO:0003824	NULL	protein phosphatase	IPR015655|IPR001932	Protein phosphatase 2C|Protein phosphatase 2C (PP2C)-like domain	GO:0003824	NULL	NULL
Dr04567	NULL	NULL	NULL	NULL	NULL	NULL	NULL	NULL
Dr04601	GO:0003677|GO:0006355	NULL	nac domain ipr003441	IPR003441	NAC domain	GO:0003677|GO:0006355	NULL	NULL
Dr04595	NULL	NULL	NULL	IPR026057|IPR025846	PC-Esterase|PMR5 N-terminal domain	NULL	NULL	NULL
Dr04617	NULL	NULL	NULL	NULL	NULL	NULL	NULL	NULL
Dr04622	GO:0009987|GO:0005488|GO:0004672|GO:0016023|GO:0008152|GO:0016020	NULL	l-type lectin-domain containing receptor kinase -like	IPR000719|IPR001220|IPR008985|IPR011009|IPR013320|IPR019825	Protein kinase domain|Legume lectin domain|Concanavalin A-like lectin/glucanases superfamily|Protein kinase-like domain|Concanavalin A-like lectin/glucanase, subgroup|Legume lectin, beta chain, Mn/Ca-binding site	GO:0004672|GO:0005524|GO:0006468|GO:0030246|GO:0016772	NULL	NULL
Dr04631	NULL	NULL	NULL	NULL	NULL	NULL	NULL	NULL
Dr04632	NULL	NULL	NULL	NULL	NULL	NULL	NULL	NULL
Dr04647	GO:0005730|GO:0006184|GO:0003924|GO:0009507|GO:0005525	NULL	interferon-induced guanylate-binding	IPR015894|IPR003191|IPR027417	Guanylate-binding protein, N-terminal|Guanylate-binding protein, C-terminal|P-loop containing nucleoside triphosphate hydrolase	GO:0003924|GO:0005525	NULL	NULL
Dr04628	GO:0044446|GO:0005515|GO:0005694|GO:0005634	NULL	histone h4	IPR009072|IPR001951	Histone H4|Histone-fold	GO:0046982|GO:0000786|GO:0003677|GO:0005634|GO:0006334	NULL	NULL
Dr04641	NULL	NULL	NULL	IPR012337	Ribonuclease H-like domain	GO:0003676	NULL	NULL
Dr04642	NULL	NULL	NULL	NULL	NULL	NULL	NULL	NULL
Dr04643	NULL	NULL	NULL	NULL	NULL	NULL	NULL	NULL
Dr25406	GO:0006810|GO:0043231|GO:0044444|GO:0016020	NULL	golgi snare 12 protein	IPR023601	Golgi SNAP receptor complex, subunit 1	GO:0000139|GO:0005801|GO:0006888|GO:0016021	NULL	NULL
Dr18082	GO:0003735|GO:0015935|GO:0006412|GO:0005739|GO:0042254	NULL	conserved hypothetical protein [Ricinus communis]	NULL	NULL	NULL	NULL	NULL
Dr18077	NULL	NULL	NULL	IPR005798|IPR027387	Cytochrome b/b6, C-terminal|Cytochrome b/b6-like domain	GO:0009055|GO:0016020|GO:0016491	NULL	NULL
Dr18081	NULL	NULL	NULL	NULL	NULL	NULL	NULL	NULL
Dr18085	NULL	NULL	NULL	IPR001694|IPR024937	NADH:ubiquinone oxidoreductase, subunit 1/F420H2 oxidoreductase subunit H|Domain X	GO:0016020|GO:0055114|GO:0006397	NULL	NULL
Dr18102	NULL	NULL	NULL	IPR001471	AP2/ERF domain	GO:0003700|GO:0006355	NULL	NULL
Dr25425	NULL	NULL	NULL	NULL	NULL	NULL	NULL	NULL
Dr25426	GO:0005737|GO:0019773|GO:0006511|GO:0005634|GO:0004298	EC:3.4.25.0	multicatalytic endopeptidase	IPR001353|IPR023332	Proteasome, subunit alpha/beta|Proteasome A-type subunit	GO:0004298|GO:0005839|GO:0051603	NULL	Reactome: REACT_11045|Reactome: REACT_13|Reactome: REACT_13635|Reactome: REACT_152|Reactome: REACT_1538|Reactome: REACT_383|Reactome: REACT_578|Reactome: REACT_6185|Reactome: REACT_6850
Dr18154	GO:0003989|GO:0006633|GO:0009317|GO:0009941|GO:0016740|GO:0009570|GO:0016020|GO:0006090	EC:6.4.1.2	acetyl co-enzyme a carboxylase carboxyltransferase alpha subunit	IPR001095	Acetyl-CoA carboxylase, alpha subunit	GO:0003989|GO:0006633|GO:0009317	EC:6.4.1.2	KEGG: 00061+6.4.1.2|KEGG: 00253+6.4.1.2|KEGG: 00620+6.4.1.2|KEGG: 00640+6.4.1.2|KEGG: 00720+6.4.1.2|MetaCyc: PWY-4381|MetaCyc: PWY-5743|MetaCyc: PWY-5744|MetaCyc: PWY-5789|MetaCyc: PWY-6679|UniPathway: UPA00655
Dr18178	GO:0016020|GO:0005783|GO:0016192	NULL	prenylated rab acceptor family protein	IPR004895	Prenylated rab acceptor PRA1	NULL	NULL	NULL
Dr18182	GO:0046983	NULL	uncharacterized basic helix-loop-helix protein at1g06150-like	IPR025610	Transcription factor MYC/MYB N-terminal	NULL	NULL	NULL
Dr18183	NULL	NULL	NULL	NULL	NULL	NULL	NULL	NULL
Dr18166	GO:0016301|GO:0016310|GO:0005089|GO:0043087	NULL	rop guanine nucleotide exchange factor 1-like	IPR006016|IPR005512|IPR014729	UspA|PRONE domain|Rossmann-like alpha/beta/alpha sandwich fold	GO:0006950|GO:0005089	NULL	NULL
Dr18168	GO:0016757	NULL	udp-glycosyltransferase 85a2-like	IPR002213	UDP-glucuronosyl/UDP-glucosyltransferase	GO:0008152|GO:0016758	NULL	NULL
Dr18174	GO:0009987|GO:0004672|GO:0016023|GO:0016020	NULL	receptor protein kinase 1-like	IPR000719|IPR000858|IPR001480|IPR011009|IPR013320|IPR002290|IPR003609|IPR000742|IPR017441|IPR008271	Protein kinase domain|S-locus glycoprotein|Bulb-type lectin domain|Protein kinase-like domain|Concanavalin A-like lectin/glucanase, subgroup|Serine/threonine- / dual specificity protein kinase, catalytic domain|Apple-like|Epidermal growth factor-like domain|Protein kinase, ATP binding site|Serine/threonine-protein kinase, active site	GO:0004672|GO:0005524|GO:0006468|GO:0048544|GO:0016772|GO:0005515|GO:0004674	NULL	NULL
Dr25429	NULL	NULL	NULL	IPR027145|IPR001680|IPR007148|IPR017986|IPR015943|IPR019775	Periodic tryptophan protein 2|WD40 repeat|Small-subunit processome, Utp12|WD40-repeat-containing domain|WD40/YVTN repeat-like-containing domain|WD40 repeat, conserved site	GO:0005515	NULL	NULL
Dr18204	GO:0008026|GO:0003676|GO:0005524|GO:0009536	NULL	atp-dependent rna helicase dhx8	IPR011709	Domain of unknown function DUF1605	NULL	NULL	NULL
Dr18217	NULL	NULL	NULL	NULL	NULL	NULL	NULL	NULL
Dr18219	GO:0006412|GO:0009955|GO:0005730|GO:0019843|GO:0003735|GO:0009941|GO:0005773|GO:0022625|GO:0005886|GO:0042254	NULL	60s ribosomal protein l9	IPR000702|IPR020040	Ribosomal protein L6|Ribosomal protein L6, alpha-beta domain	GO:0003735|GO:0005840|GO:0006412|GO:0019843	NULL	NULL
Dr25440	NULL	NULL	NULL	NULL	NULL	NULL	NULL	NULL
Dr18236	GO:0005840|GO:0003735|GO:0006412|GO:0019843|GO:0042254	NULL	60s ribosomal protein	IPR000114|IPR016180	Ribosomal protein L16|Ribosomal protein L10e/L16	GO:0003735|GO:0006412|GO:0019843|GO:0005840	NULL	NULL
Dr18229	GO:0008152|GO:0016020|GO:0044424	NULL	photosystem ii protein d1	IPR000484	Photosynthetic reaction centre, L/M	GO:0009772|GO:0019684|GO:0045156	NULL	MetaCyc: PWY-101|MetaCyc: PWY-6785
Dr18237	GO:0005840|GO:0046872|GO:0009772|GO:0030076|GO:0045156|GO:0009523|GO:0018298|GO:0016168|GO:0016021|GO:0005739|GO:0006118	NULL	ribosomal protein s1	IPR000932	Photosystem antenna protein-like	GO:0009521|GO:0009767|GO:0016020|GO:0016168|GO:0019684	NULL	NULL
Dr18238	GO:0005840|GO:0003735|GO:0006412|GO:0019843|GO:0005739|GO:0042254	NULL	ribosomal protein l16	IPR000114|IPR016180|IPR020798	Ribosomal protein L16|Ribosomal protein L10e/L16|Ribosomal protein L16, conserved site	GO:0003735|GO:0006412|GO:0019843|GO:0005840|GO:0005622	NULL	NULL
Dr25446	GO:0020037|GO:0016705|GO:0004497|GO:0005506|GO:0009055|GO:0055114|GO:0006118	NULL	cytochrome p450	IPR001128|IPR002401	Cytochrome P450|Cytochrome P450, E-class, group I	GO:0005506|GO:0016705|GO:0020037|GO:0055114	NULL	Reactome: REACT_13433
Dr25460	NULL	NULL	NULL	NULL	NULL	NULL	NULL	NULL
Dr18282	GO:0050789|GO:0044763|GO:0006796|GO:0004721|GO:0006470	EC:3.1.3.16	dual specificity protein phosphatase family protein	IPR024950|IPR000340	Dual specificity phosphatase|Dual specificity phosphatase, catalytic domain	GO:0006470|GO:0008138	NULL	NULL
Dr18272	NULL	NULL	NULL	IPR006766	Phosphate-induced protein 1	NULL	NULL	NULL
Dr04658	NULL	NULL	NULL	NULL	NULL	NULL	NULL	NULL
Dr04662	GO:0043231|GO:0016740|GO:0006259|GO:0034645	NULL	dna polymerase alpha subunit b family expressed	IPR001025	Bromo adjacent homology (BAH) domain	GO:0003677	NULL	NULL
Dr04673	GO:0005488	NULL	protein	IPR013083	Zinc finger, RING/FYVE/PHD-type	NULL	NULL	NULL
Dr04674	NULL	NULL	NULL	NULL	NULL	NULL	NULL	NULL
Dr04679	NULL	NULL	NULL	IPR001471|IPR016177	AP2/ERF domain|DNA-binding domain	GO:0003700|GO:0006355|GO:0003677	NULL	NULL
Dr04760	NULL	NULL	NULL	NULL	NULL	NULL	NULL	NULL
Dr04687	GO:0044699	NULL	tubulin-specific chaperone d-like	NULL	NULL	NULL	NULL	NULL
Dr04692	GO:0005975|GO:0003796|GO:0004568|GO:0006032|GO:0016998	EC:3.2.1.17|EC:3.2.1.14	acidic endochitinase-like	IPR001223|IPR017853|IPR013781|IPR001579	Glycoside hydrolase, family 18, catalytic domain|Glycoside hydrolase, superfamily|Glycoside hydrolase, catalytic domain|Glycoside hydrolase, chitinase active site	GO:0004553|GO:0005975|GO:0003824	EC:3.2.1.14	KEGG: 00520+3.2.1.14|MetaCyc: PWY-6902
Dr04693	GO:0009057|GO:0004553|GO:0006950|GO:0005975	EC:3.2.1.0	acidic endochitinase	IPR017853|IPR013781	Glycoside hydrolase, superfamily|Glycoside hydrolase, catalytic domain	GO:0003824|GO:0005975	NULL	NULL
Dr04694	GO:0005975|GO:0003796|GO:0004568|GO:0006032|GO:0016998	EC:3.2.1.17|EC:3.2.1.14	acidic endochitinase-like	IPR001223|IPR017853|IPR013781|IPR001579	Glycoside hydrolase, family 18, catalytic domain|Glycoside hydrolase, superfamily|Glycoside hydrolase, catalytic domain|Glycoside hydrolase, chitinase active site	GO:0004553|GO:0005975|GO:0003824	EC:3.2.1.14	KEGG: 00520+3.2.1.14|MetaCyc: PWY-6902
Dr04699	NULL	NULL	NULL	IPR022690|IPR022692|IPR001191	Geminivirus AL1 replication-associated protein, catalytic domain|Geminivirus AL1 replication-associated protein, central domain|Geminivirus AL1, replication-associated protein	GO:0006260|GO:0016888|GO:0005198|GO:0019028	NULL	NULL
Dr04744	GO:0016740	NULL	protein	NULL	NULL	NULL	NULL	NULL
Dr04751	GO:0003713|GO:0003677|GO:0006355|GO:0005667|GO:0045941	NULL	rna polymerase ii transcriptional coactivator kelp	IPR003173|IPR019557|IPR009044	Transcriptional coactivator p15 (PC4)|Aminotransferase-like, plant mobile domain|ssDNA-binding transcriptional regulator	GO:0003677|GO:0003713|GO:0006355	NULL	NULL
Dr18324	GO:0004185|GO:0006508	EC:3.4.16.0	serine carboxypeptidase-like 43	NULL	NULL	NULL	NULL	NULL
Dr18313	NULL	NULL	NULL	IPR021099	Plant organelle RNA recognition domain	NULL	NULL	NULL
Dr25468	NULL	NULL	NULL	NULL	NULL	NULL	NULL	NULL
Dr18383	GO:0046872|GO:0016705|GO:0004497	NULL	flavonoid 3 -hydroxylase	IPR001128|IPR002401|IPR017972	Cytochrome P450|Cytochrome P450, E-class, group I|Cytochrome P450, conserved site	GO:0005506|GO:0016705|GO:0020037|GO:0055114	NULL	Reactome: REACT_13433
Dr18372	GO:0016772|GO:0000166	NULL	disease resistance protein	IPR002182|IPR027417	NB-ARC|P-loop containing nucleoside triphosphate hydrolase	GO:0043531	NULL	NULL
Dr18381	GO:0016491|GO:0005488	NULL	flavonoid 3 -hydroxylase	IPR001128	Cytochrome P450	GO:0005506|GO:0016705|GO:0020037|GO:0055114	NULL	Reactome: REACT_13433
Dr18368	GO:0006355|GO:0009627|GO:0043565|GO:0009410|GO:0009863|GO:0003700|GO:0005737|GO:0005667|GO:0045449	NULL	bzip transcription factor	IPR025422	Transcription factor TGA like domain	GO:0006351|GO:0043565	NULL	NULL
Dr18411	NULL	NULL	NULL	NULL	NULL	NULL	NULL	NULL
Dr18450	GO:0009536	NULL	receptor-like protein kinase	NULL	NULL	NULL	NULL	NULL
Dr18441	NULL	NULL	NULL	NULL	NULL	NULL	NULL	NULL
Dr18445	GO:0051704|GO:0016757	NULL	glucomannan 4-beta-mannosyltransferase 9-like	NULL	NULL	NULL	NULL	NULL
Dr18431	GO:0043231|GO:0044444	NULL	aspartic proteinase nepenthesin-1-like	IPR001461|IPR021109	Aspartic peptidase|Aspartic peptidase domain	GO:0004190|GO:0006508	NULL	NULL
Dr18432	GO:0009536	NULL	ring finger family protein	IPR001841|IPR013083	Zinc finger, RING-type|Zinc finger, RING/FYVE/PHD-type	GO:0005515|GO:0008270	NULL	NULL
Dr18438	NULL	NULL	NULL	NULL	NULL	NULL	NULL	NULL
Dr25516	GO:0009058|GO:0006520|GO:0008483|GO:0016847|GO:0006519	EC:2.6.1.0|EC:4.4.1.14	1-aminocyclopropane-1-carboxylate synthase	IPR004839|IPR015424|IPR015422|IPR004838	Aminotransferase, class I/classII|Pyridoxal phosphate-dependent transferase|Pyridoxal phosphate-dependent transferase, major region, subdomain 2|Aminotransferases, class-I, pyridoxal-phosphate-binding site	GO:0009058|GO:0030170|GO:0003824	NULL	Reactome: REACT_13
Dr04769	GO:0016310|GO:0004672	NULL	cysteine-rich receptor-like protein kinase	IPR001245|IPR011009|IPR000719	Serine-threonine/tyrosine-protein kinase catalytic domain|Protein kinase-like domain|Protein kinase domain	GO:0004672|GO:0006468|GO:0016772|GO:0005524	NULL	NULL
Dr04779	GO:0005739|GO:0016772	NULL	aarf domain-containing kinase	NULL	NULL	NULL	NULL	NULL
Dr04797	NULL	NULL	NULL	NULL	NULL	NULL	NULL	NULL
Dr04774	NULL	NULL	NULL	NULL	NULL	NULL	NULL	NULL
Dr04838	NULL	NULL	NULL	NULL	NULL	NULL	NULL	NULL
Dr04816	GO:0005737|GO:0016579|GO:0005886|GO:0016567|GO:0006511|GO:0005524|GO:0004842|GO:0005634	EC:6.3.2.19	ubiquitin-conjugating enzyme e2-17 kda 9	IPR000608|IPR016135	Ubiquitin-conjugating enzyme, E2|Ubiquitin-conjugating enzyme/RWD-like	GO:0016881	NULL	NULL
Dr04817	GO:0016874|GO:0044464	NULL	ubiquitin-conjugating enzyme e2-17 kda	IPR000608|IPR016135|IPR023313	Ubiquitin-conjugating enzyme, E2|Ubiquitin-conjugating enzyme/RWD-like|Ubiquitin-conjugating enzyme, active site	GO:0016881	NULL	UniPathway: UPA00143
Dr04820	GO:0006810|GO:0043231|GO:0044444|GO:0005215	NULL	sec14p-like phosphatidylinositol transfer family protein	IPR001251|IPR011074	CRAL-TRIO domain|CRAL/TRIO, N-terminal domain	NULL	NULL	NULL
Dr04898	GO:0007264|GO:0009860|GO:0044464|GO:0015031|GO:0016020|GO:0005525	NULL	protein	IPR001806|IPR027417|IPR020849|IPR003578|IPR003579|IPR005225	Small GTPase superfamily|P-loop containing nucleoside triphosphate hydrolase|Small GTPase superfamily, Ras type|Small GTPase superfamily, Rho type|Small GTPase superfamily, Rab type|Small GTP-binding protein domain	GO:0005525|GO:0007264|GO:0003924|GO:0006184|GO:0007165|GO:0016020|GO:0005622|GO:0015031	NULL	Reactome: REACT_11044
Dr04877	NULL	NULL	NULL	NULL	NULL	NULL	NULL	NULL
Dr04886	NULL	NULL	NULL	IPR015300	DNA-binding pseudobarrel domain	NULL	NULL	NULL
Dr04915	NULL	NULL	NULL	NULL	NULL	NULL	NULL	NULL
Dr04952	GO:0008270|GO:0009536	NULL	far1-related protein	IPR013763	Cyclin-like	NULL	NULL	NULL
Dr04931	GO:0044436|GO:0009570	NULL	probable plastid-lipid-associated protein chloroplastic-like	IPR006843	Plastid lipid-associated protein/fibrillin conserved domain	GO:0005198|GO:0009507	NULL	NULL
Dr18617	GO:0046872|GO:0016705|GO:0004497	NULL	cytochrome p450	IPR001128|IPR006456	Cytochrome P450|ZF-HD homeobox protein, Cys/His-rich dimerisation domain	GO:0005506|GO:0016705|GO:0020037|GO:0055114	NULL	Reactome: REACT_13433
Dr18682	GO:0016740	NULL	g-type lectin s-receptor-like serine threonine-protein kinase at1g34300-like	IPR001480	Bulb-type lectin domain	NULL	NULL	NULL
Dr18684	NULL	NULL	NULL	NULL	NULL	NULL	NULL	NULL
Dr18671	NULL	NULL	NULL	NULL	NULL	NULL	NULL	NULL
Dr18699	GO:0046872|GO:0050896|GO:0005618|GO:0005576	NULL	germin-like protein	IPR006045|IPR011051|IPR014710|IPR001929|IPR019780	Cupin 1|Germin|RmlC-like cupin domain|RmlC-like jelly roll fold|Germin, manganese binding site	GO:0045735|GO:0030145	NULL	NULL
Dr18700	GO:0044464	NULL	auxin-binding protein abp19a-like	IPR006045|IPR011051|IPR014710|IPR001929|IPR019780	Cupin 1|Germin|RmlC-like cupin domain|RmlC-like jelly roll fold|Germin, manganese binding site	GO:0045735|GO:0030145	NULL	NULL
Dr18702	GO:0044464	NULL	germin-like protein	IPR006045|IPR011051|IPR014710|IPR001929	Cupin 1|Germin|RmlC-like cupin domain|RmlC-like jelly roll fold	GO:0045735|GO:0030145	NULL	NULL
Dr18639	NULL	NULL	NULL	NULL	NULL	NULL	NULL	NULL
Dr18707	GO:0050896|GO:0046872|GO:0008152|GO:0009507|GO:0008168	EC:2.1.1.0	5-methyltetrahydropteroyltriglutamate-homocysteine expressed	IPR002629|IPR013215	Methionine synthase, vitamin-B12 independent|Cobalamin (vitamin B12)-independent methionine synthase MetE, N-terminal	GO:0003871|GO:0009086|GO:0008270|GO:0008652	EC:2.1.1.14	KEGG: 00270+2.1.1.14|KEGG: 00450+2.1.1.14|MetaCyc: PWY-5041|MetaCyc: PWY-6151|MetaCyc: PWY-6936|MetaCyc: PWY-702|UniPathway: UPA00051
Dr18713	NULL	NULL	NULL	IPR005067|IPR012348	Fatty acid desaturase, type 2|Ribonucleotide reductase-related	GO:0006631|GO:0045300|GO:0055114|GO:0016491	EC:1.14.19.2	KEGG: 00061+1.14.19.2|MetaCyc: PWY-5147|UniPathway: UPA00199|Reactome: REACT_1698
Dr18710	NULL	NULL	NULL	IPR027443	Isopenicillin N synthase-like	NULL	NULL	NULL
Dr18720	GO:0050794	NULL	abscisic acid receptor pyl6	IPR019587|IPR023393	Polyketide cyclase/dehydrase|START-like domain	NULL	NULL	NULL
Dr18726	NULL	NULL	NULL	NULL	NULL	NULL	NULL	NULL
Dr25560	NULL	NULL	NULL	IPR001245|IPR011009|IPR013320|IPR000719|IPR017441	Serine-threonine/tyrosine-protein kinase catalytic domain|Protein kinase-like domain|Concanavalin A-like lectin/glucanase, subgroup|Protein kinase domain|Protein kinase, ATP binding site	GO:0004672|GO:0006468|GO:0016772|GO:0005524	NULL	NULL
Dr18788	NULL	NULL	NULL	NULL	NULL	NULL	NULL	NULL
Dr18792	NULL	NULL	NULL	IPR016159	Cullin repeat-like-containing domain	NULL	NULL	NULL
Dr18790	NULL	NULL	NULL	NULL	NULL	NULL	NULL	NULL
Dr05010	GO:0003677|GO:0006355	NULL	nac domain ipr003441	NULL	NULL	NULL	NULL	NULL
Dr04999	GO:0046872|GO:0044699|GO:0050896|GO:0016491|GO:0044464	NULL	cupredoxin-like protein	IPR011706|IPR008972|IPR002355	Multicopper oxidase, type 2|Cupredoxin|Multicopper oxidase, copper-binding site	GO:0005507|GO:0016491|GO:0055114	NULL	NULL
Dr05037	GO:0016020|GO:0016772|GO:0000166	NULL	metallo-beta-lactamase domain-containing protein	NULL	NULL	NULL	NULL	NULL
Dr05039	NULL	NULL	NULL	NULL	NULL	NULL	NULL	NULL
Dr05057	NULL	NULL	NULL	NULL	NULL	NULL	NULL	NULL
Dr05091	GO:0005739	NULL	protein	NULL	NULL	NULL	NULL	NULL
Dr05060	GO:0005771|GO:0007032|GO:0016192|GO:0005524|GO:0008568	EC:3.6.4.3	vacuolar sorting protein 4b	NULL	NULL	NULL	NULL	NULL
Dr05128	GO:0003864|GO:0050897|GO:0015940|GO:0032259|GO:0008270|GO:0008168|GO:0005739	EC:2.1.2.11|EC:2.1.1.0	3-methyl-2-oxobutanoate hydroxymethyltransferase	NULL	NULL	NULL	NULL	NULL
Dr05104	NULL	NULL	NULL	NULL	NULL	NULL	NULL	NULL
Dr05105	NULL	NULL	NULL	NULL	NULL	NULL	NULL	NULL
Dr05096	GO:0022891|GO:0016021|GO:0055085|GO:0008643	NULL	plastidic glucose transporter 3	NULL	NULL	NULL	NULL	NULL
Dr05117	GO:0050896	NULL	burp domain-containing protein	NULL	NULL	NULL	NULL	NULL
Dr05135	GO:0009507	NULL	hypothetical chloroplast rf68	NULL	NULL	NULL	NULL	NULL
Dr05119	GO:0048451|GO:0051537|GO:0009867|GO:0046872|GO:0045454|GO:0009055|GO:0009863|GO:0048653|GO:0048448|GO:0005737|GO:0005634|GO:0015035|GO:0006118	NULL	grx_c8 - glutaredoxin subgroup iii	NULL	NULL	NULL	NULL	NULL
Dr05101	NULL	NULL	NULL	NULL	NULL	NULL	NULL	NULL
Dr00014	NULL	NULL	NULL	NULL	NULL	NULL	NULL	NULL
Dr00026	GO:0005488|GO:0035251	NULL	cis-zeatin o-glucosyltransferase	IPR002213	UDP-glucuronosyl/UDP-glucosyltransferase	GO:0008152|GO:0016758	NULL	NULL
Dr00033	GO:0044444|GO:0043229	NULL	40s ribosomal protein s3	IPR009019|IPR001351	K homology domain, prokaryotic type|Ribosomal protein S3, C-terminal	GO:0003723|GO:0003735|GO:0005840|GO:0006412	NULL	NULL
Dr00035	GO:0009628|GO:0006950|GO:0044464	NULL	peroxidase 3	IPR002016|IPR010255|IPR000823|IPR019794	Haem peroxidase, plant/fungal/bacterial|Plant peroxidase|Haem peroxidase|Peroxidase, active site	GO:0004601|GO:0006979|GO:0020037|GO:0055114	EC:1.11.1.7	KEGG: 00360+1.11.1.7|KEGG: 00940+1.11.1.7|MetaCyc: PWY-5461|MetaCyc: PWY-7214
Dr00036	GO:0016831	EC:4.1.1.0	tyrosine dopa decarboxylase	IPR002129|IPR015424|IPR015421|IPR015422|IPR010977|IPR021115	Pyridoxal phosphate-dependent decarboxylase|Aromatic-L-amino-acid decarboxylase|Pyridoxal phosphate-dependent transferase|Pyridoxal phosphate-dependent transferase, major region, subdomain 1|Pyridoxal phosphate-dependent transferase, major region, subdomain 2|Pyridoxal-phosphate binding site	GO:0016831|GO:0019752|GO:0030170|GO:0003824|GO:0006520	NULL	NULL
Dr00049	GO:0005874|GO:0051258|GO:0006184|GO:0007018|GO:0003924|GO:0005200|GO:0005737|GO:0005525	NULL	alpha-tubulin 2	IPR000217|IPR003008	Tubulin|Tubulin/FtsZ, GTPase domain	GO:0005874|GO:0007017	NULL	NULL
Dr00058	GO:0004871|GO:0007186|GO:0044707|GO:0005525|GO:0006184|GO:0044424|GO:0031683|GO:0003924|GO:0009743	NULL	gtp-binding protein alpha	NULL	NULL	NULL	NULL	NULL
Dr00072	GO:0009536|GO:0005739	NULL	protein af-9 homolog	IPR005033	YEATS	GO:0005634|GO:0006355	NULL	NULL
Dr00099	NULL	NULL	NULL	NULL	NULL	NULL	NULL	NULL
Dr00101	NULL	NULL	NULL	IPR012337	Ribonuclease H-like domain	GO:0003676	NULL	NULL
Dr00119	NULL	NULL	NULL	NULL	NULL	NULL	NULL	NULL
Dr00104	GO:0008233|GO:0016023	NULL	subtilisin-like protease	IPR015500|IPR000209|IPR010259|IPR009020	Peptidase S8, subtilisin-related|Peptidase S8/S53 domain|Proteinase inhibitor I9|Proteinase inhibitor, propeptide	GO:0004252|GO:0006508|GO:0042802|GO:0043086	NULL	NULL
Dr00129	GO:0035265|GO:0051726|GO:0042127	NULL	protein	IPR005651	Uncharacterised protein family UPF0434/Trm112	NULL	NULL	NULL
Dr00134	NULL	NULL	NULL	IPR001471	AP2/ERF domain	GO:0003700|GO:0006355	NULL	NULL
Dr00151	GO:0009536	NULL	60s ribosomal export protein nmd3	NULL	NULL	NULL	NULL	NULL
Dr00153	NULL	NULL	NULL	NULL	NULL	NULL	NULL	NULL
Dr00161	NULL	NULL	NULL	NULL	NULL	NULL	NULL	NULL
Dr00170	NULL	NULL	NULL	NULL	NULL	NULL	NULL	NULL
Dr18868	GO:0044260|GO:0090304|GO:0005739	NULL	maturase-related protein	IPR024937	Domain X	GO:0006397	NULL	NULL
Dr18876	NULL	NULL	NULL	IPR024937	Domain X	GO:0006397	NULL	NULL
Dr18881	NULL	NULL	NULL	NULL	NULL	NULL	NULL	NULL
Dr18891	NULL	NULL	NULL	NULL	NULL	NULL	NULL	NULL
Dr18872	GO:0006120|GO:0051287|GO:0048038|GO:0008137|GO:0005747|GO:0006744|GO:0006814|GO:0015992	EC:1.6.5.3	nadh dehydrogenase subunit 7	IPR001135	NADH-quinone oxidoreductase, subunit D	GO:0016651|GO:0048038|GO:0051287|GO:0055114	NULL	NULL
Dr18883	GO:0006120|GO:0051287|GO:0048038|GO:0008137|GO:0005747|GO:0006744|GO:0006814|GO:0015992	EC:1.6.5.3	nadh dehydrogenase subunit 7	IPR001135	NADH-quinone oxidoreductase, subunit D	GO:0016651|GO:0048038|GO:0051287|GO:0055114	NULL	NULL
Dr18884	GO:0006120|GO:0051287|GO:0048038|GO:0008137|GO:0005747|GO:0006744|GO:0006814|GO:0015992	EC:1.6.5.3	nadh dehydrogenase subunit 7	IPR001135	NADH-quinone oxidoreductase, subunit D	GO:0016651|GO:0048038|GO:0051287|GO:0055114	NULL	NULL
Dr18885	GO:0006120|GO:0051287|GO:0048038|GO:0008137|GO:0005747|GO:0006744|GO:0006814|GO:0015992	EC:1.6.5.3	nadh dehydrogenase subunit 7	IPR001135	NADH-quinone oxidoreductase, subunit D	GO:0016651|GO:0048038|GO:0051287|GO:0055114	NULL	NULL
Dr18890	NULL	NULL	NULL	NULL	NULL	NULL	NULL	NULL
Dr18894	NULL	NULL	NULL	NULL	NULL	NULL	NULL	NULL
Dr18928	GO:0016310|GO:0004672|GO:0009536	NULL	kinase-like protein	IPR000719|IPR001245|IPR011009|IPR013320|IPR008271	Protein kinase domain|Serine-threonine/tyrosine-protein kinase catalytic domain|Protein kinase-like domain|Concanavalin A-like lectin/glucanase, subgroup|Serine/threonine-protein kinase, active site	GO:0004672|GO:0005524|GO:0006468|GO:0016772|GO:0004674	NULL	NULL
Dr18960	NULL	NULL	NULL	NULL	NULL	NULL	NULL	NULL
Dr25605	GO:0004553|GO:0016023|GO:0009628|GO:0006950|GO:0005975	EC:3.2.1.0	class iii acidic chitinase	IPR001223|IPR017853|IPR013781|IPR001579	Glycoside hydrolase, family 18, catalytic domain|Glycoside hydrolase, superfamily|Glycoside hydrolase, catalytic domain|Glycoside hydrolase, chitinase active site	GO:0004553|GO:0005975|GO:0003824	EC:3.2.1.14	KEGG: 00520+3.2.1.14|MetaCyc: PWY-6902
Dr25609	NULL	NULL	NULL	NULL	NULL	NULL	NULL	NULL
Dr18973	GO:0043231|GO:0044444|GO:0016020	NULL	carrier protein 1	NULL	NULL	NULL	NULL	NULL
Dr18987	NULL	NULL	NULL	IPR002885	Pentatricopeptide repeat	NULL	NULL	NULL
Dr19002	GO:0003676|GO:0000166	NULL	ctc-interacting domain 11 protein	IPR000504|IPR009818|IPR012677	RNA recognition motif domain|Ataxin-2, C-terminal|Nucleotide-binding, alpha-beta plait	GO:0003676|GO:0000166	NULL	NULL
Dr19034	GO:0016787	NULL	xylem serine proteinase 1	IPR015500|IPR000209|IPR023828	Peptidase S8, subtilisin-related|Peptidase S8/S53 domain|Peptidase S8, subtilisin, Ser-active site	GO:0004252|GO:0006508	NULL	NULL
Dr19009	NULL	NULL	NULL	IPR011598|IPR025610	Myc-type, basic helix-loop-helix (bHLH) domain|Transcription factor MYC/MYB N-terminal	GO:0046983	NULL	NULL
Dr19023	GO:0044765|GO:0016020|GO:0005739	NULL	potassium efflux antiporter	IPR006153	Cation/H+ exchanger	GO:0006812|GO:0015299|GO:0016021|GO:0055085	NULL	NULL
Dr19047	NULL	NULL	NULL	NULL	NULL	NULL	NULL	NULL
Dr19074	GO:0009524|GO:0005886|GO:0006468|GO:0005524|GO:0005634|GO:0005829|GO:0004674|GO:0009069	EC:2.7.11.0	protein kinase	IPR000719|IPR011009|IPR002290|IPR008271	Protein kinase domain|Protein kinase-like domain|Serine/threonine- / dual specificity protein kinase, catalytic domain|Serine/threonine-protein kinase, active site	GO:0004672|GO:0005524|GO:0006468|GO:0016772|GO:0004674	NULL	NULL
Dr19077	NULL	NULL	NULL	NULL	NULL	NULL	NULL	NULL
Dr25623	NULL	NULL	NULL	NULL	NULL	NULL	NULL	NULL
Dr19086	GO:0006629|GO:0016787|GO:0016020	NULL	beta- gba2 type protein	IPR006775|IPR024462|IPR008928|IPR012341|IPR014551	Glucosylceramidase|Beta-glucosidase, GBA2 type, N-terminal|Six-hairpin glycosidase-like|Six-hairpin glycosidase|Beta-glucosidase, GBA2 type	GO:0004348|GO:0006665|GO:0016021|GO:0003824|GO:0006680|GO:0016020	EC:3.2.1.45	KEGG: 00511+3.2.1.45|KEGG: 00600+3.2.1.45
Dr19084	NULL	NULL	NULL	NULL	NULL	NULL	NULL	NULL
Dr19110	NULL	NULL	NULL	IPR004265	Plant disease resistance response protein	NULL	NULL	NULL
Dr19113	NULL	NULL	NULL	IPR004265	Plant disease resistance response protein	NULL	NULL	NULL
Dr05296	GO:0006259	NULL	brca1 brca2-containing complex subunit 3	NULL	NULL	NULL	NULL	NULL
Dr05290	NULL	NULL	NULL	NULL	NULL	NULL	NULL	NULL
Dr05257	GO:0005739	NULL	saur family protein	NULL	NULL	NULL	NULL	NULL
Dr05260	NULL	NULL	NULL	NULL	NULL	NULL	NULL	NULL
Dr05236	NULL	NULL	NULL	NULL	NULL	NULL	NULL	NULL
Dr05298	NULL	NULL	NULL	NULL	NULL	NULL	NULL	NULL
Dr05311	NULL	NULL	NULL	NULL	NULL	NULL	NULL	NULL
Dr05351	NULL	NULL	NULL	NULL	NULL	NULL	NULL	NULL
Dr05352	NULL	NULL	NULL	NULL	NULL	NULL	NULL	NULL
Dr05353	NULL	NULL	NULL	NULL	NULL	NULL	NULL	NULL
Dr05360	GO:0005234|GO:0030288|GO:0004970|GO:0016021|GO:0006811|GO:0035235|GO:0004965|GO:0007268|GO:0007216	NULL	glutamate receptor	NULL	NULL	NULL	NULL	NULL
Dr05362	GO:0005230|GO:0004930|GO:0007166|GO:0016020|GO:0006811	NULL	glutamate receptor	NULL	NULL	NULL	NULL	NULL
Dr05389	GO:0016301	NULL	protein kinase	NULL	NULL	NULL	NULL	NULL
Dr05405	NULL	NULL	NULL	NULL	NULL	NULL	NULL	NULL
Dr05377	NULL	NULL	NULL	NULL	NULL	NULL	NULL	NULL
Dr05378	GO:0016740	NULL	anthocyanin 5-o-glucosyltransferase	NULL	NULL	NULL	NULL	NULL
Dr05382	NULL	NULL	NULL	NULL	NULL	NULL	NULL	NULL
Dr05406	NULL	NULL	NULL	NULL	NULL	NULL	NULL	NULL
Dr19120	NULL	NULL	NULL	NULL	NULL	NULL	NULL	NULL
Dr19135	GO:0005618|GO:0009651|GO:0030244|GO:0000138|GO:0009506|GO:0052691|GO:0005515|GO:0005576|GO:0046686|GO:0016757|GO:0022626|GO:0005886	EC:5.4.99.30	reversibly glycosylated polypeptide	IPR004901	Reversibly glycosylated polypeptide family	GO:0016866|GO:0030244	NULL	NULL
Dr25648	GO:0005737|GO:0045548|GO:0009800|GO:0006559|GO:0006570|GO:0009821	EC:4.3.1.5	phenylalanine ammonia-lyase	IPR001106|IPR008948|IPR023144|IPR024083	Aromatic amino acid lyase|L-Aspartase-like|Phenylalanine ammonia-lyase, shielding domain|Fumarase/histidase, N-terminal	GO:0009058|GO:0016841|GO:0003824	EC:4.3.1.24	KEGG: 00360+4.3.1.24|KEGG: 00940+4.3.1.24|MetaCyc: PWY-1121|MetaCyc: PWY-5883|MetaCyc: PWY-6444|MetaCyc: PWY-6457|UniPathway: UPA00713
Dr19145	GO:0009507|GO:0005525	NULL	gtp-binding protein	IPR016484|IPR006073|IPR027417|IPR005225	GTP-binding protein EngA|GTP binding domain|P-loop containing nucleoside triphosphate hydrolase|Small GTP-binding protein domain	GO:0005525	NULL	NULL
Dr19146	GO:0009507|GO:0005525	NULL	gtp-binding protein	IPR016484|IPR006073|IPR027417	GTP-binding protein EngA|GTP binding domain|P-loop containing nucleoside triphosphate hydrolase	GO:0005525	NULL	NULL
Dr19203	GO:0005515	NULL	s-phase kinase-associated protein 1	IPR001232|IPR016072|IPR016073|IPR011333|IPR016897	SKP1 component|SKP1 component, dimerisation|SKP1 component, POZ domain|BTB/POZ fold|E3 ubiquitin ligase, SCF complex, Skp subunit	GO:0006511	NULL	Reactome: REACT_6185|UniPathway: UPA00143|UniPathway: UPA00143
Dr19192	GO:0006996|GO:0043234|GO:0015630|GO:0044444|GO:0044430	NULL	65-kda microtubule-associated protein 3-like	IPR003890|IPR007145|IPR016024|IPR016021	MIF4G-like, type 3|Microtubule-associated protein, MAP65/Ase1/PRC1|Armadillo-type fold|MIF4-like, type 1/2/3	GO:0003723|GO:0005515|GO:0000226|GO:0000910|GO:0008017|GO:0005488	NULL	NULL
Dr19193	GO:0003676|GO:0006412	NULL	eukaryotic translation initiation factor 4g	IPR003890|IPR016024|IPR016021	MIF4G-like, type 3|Armadillo-type fold|MIF4-like, type 1/2/3	GO:0003723|GO:0005515|GO:0005488	NULL	NULL
Dr19195	GO:0005739	NULL	pentatricopeptide repeat-containing	IPR002885	Pentatricopeptide repeat	NULL	NULL	NULL
Dr19175	GO:0016491|GO:0005488	NULL	low quality protein: alcohol dehydrogenase-like 1-like	IPR002085|IPR013149|IPR013154|IPR011032|IPR016040|IPR002328	Alcohol dehydrogenase superfamily, zinc-type|Alcohol dehydrogenase, C-terminal|Alcohol dehydrogenase GroES-like|GroES (chaperonin 10)-like|NAD(P)-binding domain|Alcohol dehydrogenase, zinc-type, conserved site	GO:0008270|GO:0016491|GO:0055114	NULL	NULL
Dr25661	GO:0005507|GO:0052716|GO:0009834|GO:0008447|GO:0048046|GO:0046274|GO:0055114|GO:0006118|GO:0019852	EC:1.10.3.3	laccase 1a	IPR001117|IPR011706|IPR008972|IPR002355	Multicopper oxidase, type 1|Multicopper oxidase, type 2|Cupredoxin|Multicopper oxidase, copper-binding site	GO:0016491|GO:0055114|GO:0005507	NULL	NULL
Dr19289	NULL	NULL	NULL	IPR004252	Probable transposase, Ptta/En/Spm, plant	NULL	NULL	NULL
Dr19316	GO:0016746|GO:0010030|GO:0005634	NULL	global transcription factor group	IPR001487	Bromodomain	GO:0005515	NULL	NULL
Dr19297	GO:0016787	NULL	probable carboxylesterase 18-like	IPR013094	Alpha/beta hydrolase fold-3	GO:0008152|GO:0016787	NULL	NULL
Dr19367	NULL	NULL	NULL	NULL	NULL	NULL	NULL	NULL
Dr19374	NULL	NULL	NULL	NULL	NULL	NULL	NULL	NULL
Dr19387	NULL	NULL	NULL	NULL	NULL	NULL	NULL	NULL
Dr19369	NULL	NULL	NULL	NULL	NULL	NULL	NULL	NULL
Dr19371	NULL	NULL	NULL	NULL	NULL	NULL	NULL	NULL
Dr05436	GO:0019438|GO:0035251|GO:1901362|GO:0018130	NULL	udp-	NULL	NULL	NULL	NULL	NULL
Dr05450	GO:0005739	NULL	pentatricopeptide repeat-containing protein	NULL	NULL	NULL	NULL	NULL
Dr05468	NULL	NULL	NULL	NULL	NULL	NULL	NULL	NULL
Dr05489	NULL	NULL	NULL	NULL	NULL	NULL	NULL	NULL
Dr05492	NULL	NULL	NULL	NULL	NULL	NULL	NULL	NULL
Dr05496	NULL	NULL	NULL	NULL	NULL	NULL	NULL	NULL
Dr19392	NULL	NULL	NULL	NULL	NULL	NULL	NULL	NULL
Dr25684	GO:0016779|GO:0008152|GO:0009536	EC:2.7.7.0	udp-glucose pyrophosphorylase 3	NULL	NULL	NULL	NULL	NULL
Dr19452	NULL	NULL	NULL	NULL	NULL	NULL	NULL	NULL
Dr19406	NULL	NULL	NULL	IPR001480	Bulb-type lectin domain	NULL	NULL	NULL
Dr19413	NULL	NULL	NULL	IPR001480	Bulb-type lectin domain	NULL	NULL	NULL
Dr19463	NULL	NULL	NULL	IPR013126	Heat shock protein 70 family	NULL	NULL	NULL
Dr19456	NULL	NULL	NULL	IPR001611|IPR003591	Leucine-rich repeat|Leucine-rich repeat, typical subtype	GO:0005515	NULL	NULL
Dr19464	NULL	NULL	NULL	IPR001611	Leucine-rich repeat	GO:0005515	NULL	NULL
Dr19487	GO:0016772|GO:0043231|GO:0044444	NULL	s-receptor kinase	IPR000858|IPR001480|IPR001245|IPR013227|IPR011009|IPR013320|IPR003609|IPR000719|IPR017441	S-locus glycoprotein|Bulb-type lectin domain|Serine-threonine/tyrosine-protein kinase catalytic domain|PAN-2 domain|Protein kinase-like domain|Concanavalin A-like lectin/glucanase, subgroup|Apple-like|Protein kinase domain|Protein kinase, ATP binding site	GO:0048544|GO:0004672|GO:0006468|GO:0016772|GO:0005524	NULL	NULL
Dr19478	GO:0009987|GO:0043231|GO:0044444|GO:0016301	NULL	g-type lectin s-receptor-like serine threonine-protein kinase at2g19130-like	IPR000719|IPR000858|IPR001480|IPR013227|IPR011009|IPR013320|IPR002290|IPR003609|IPR024171|IPR017441|IPR008271	Protein kinase domain|S-locus glycoprotein|Bulb-type lectin domain|PAN-2 domain|Protein kinase-like domain|Concanavalin A-like lectin/glucanase, subgroup|Serine/threonine- / dual specificity protein kinase, catalytic domain|Apple-like|S-receptor-like serine/threonine-protein kinase|Protein kinase, ATP binding site|Serine/threonine-protein kinase, active site	GO:0004672|GO:0005524|GO:0006468|GO:0048544|GO:0016772|GO:0004674	NULL	NULL
Dr19480	GO:0009987|GO:0016023|GO:0016301	NULL	g-type lectin s-receptor-like serine threonine-protein kinase at2g19130-like	IPR000719|IPR000858|IPR001480|IPR013227|IPR011009|IPR013320|IPR002290|IPR003609|IPR024171|IPR017441|IPR008271	Protein kinase domain|S-locus glycoprotein|Bulb-type lectin domain|PAN-2 domain|Protein kinase-like domain|Concanavalin A-like lectin/glucanase, subgroup|Serine/threonine- / dual specificity protein kinase, catalytic domain|Apple-like|S-receptor-like serine/threonine-protein kinase|Protein kinase, ATP binding site|Serine/threonine-protein kinase, active site	GO:0004672|GO:0005524|GO:0006468|GO:0048544|GO:0016772|GO:0004674	NULL	NULL
Dr19532	NULL	NULL	NULL	NULL	NULL	NULL	NULL	NULL
Dr25718	NULL	NULL	NULL	NULL	NULL	NULL	NULL	NULL
Dr05522	NULL	NULL	NULL	NULL	NULL	NULL	NULL	NULL
Dr05530	NULL	NULL	NULL	NULL	NULL	NULL	NULL	NULL
Dr05552	NULL	NULL	NULL	NULL	NULL	NULL	NULL	NULL
Dr05568	GO:0055114|GO:0050590|GO:0009536|GO:0042432	EC:1.14.11.20	2og-fe oxygenase	NULL	NULL	NULL	NULL	NULL
Dr05587	NULL	NULL	NULL	NULL	NULL	NULL	NULL	NULL
Dr05593	GO:0005739	NULL	saur36 - auxin-responsive saur family member	NULL	NULL	NULL	NULL	NULL
Dr05679	NULL	NULL	NULL	NULL	NULL	NULL	NULL	NULL
Dr05691	NULL	NULL	NULL	NULL	NULL	NULL	NULL	NULL
Dr05616	NULL	NULL	NULL	NULL	NULL	NULL	NULL	NULL
Dr05631	NULL	NULL	NULL	NULL	NULL	NULL	NULL	NULL
Dr05686	NULL	NULL	NULL	NULL	NULL	NULL	NULL	NULL
Dr05687	GO:0006629|GO:0005773|GO:0046686|GO:0016023|GO:0004190|GO:0006508|GO:0005783|GO:0009651	EC:3.4.23.0	aspartic proteinase	NULL	NULL	NULL	NULL	NULL
Dr05615	NULL	NULL	NULL	NULL	NULL	NULL	NULL	NULL
Dr19666	NULL	NULL	NULL	NULL	NULL	NULL	NULL	NULL
Dr19656	GO:0033993|GO:0006073|GO:0005618|GO:0009725|GO:0016758|GO:0071554|GO:0009266|GO:1901700|GO:0044767|GO:0016023|GO:0016787|GO:0006950	EC:2.4.1.0	xyloglucan endotransglycosylase	IPR000757|IPR010713|IPR008985|IPR013320	Glycoside hydrolase, family 16|Xyloglucan endo-transglycosylase, C-terminal|Concanavalin A-like lectin/glucanases superfamily|Concanavalin A-like lectin/glucanase, subgroup	GO:0004553|GO:0005975|GO:0005618|GO:0006073|GO:0016762|GO:0048046	NULL	NULL
Dr19671	GO:0009987|GO:0044699|GO:0016740|GO:0008152|GO:0044434	NULL	beta-ketoacyl-acp synthase i	IPR014030|IPR016039|IPR016038	Beta-ketoacyl synthase, N-terminal|Thiolase-like|Thiolase-like, subgroup	GO:0003824|GO:0008152	NULL	NULL
Dr19674	NULL	NULL	NULL	NULL	NULL	NULL	NULL	NULL
Dr19684	NULL	NULL	NULL	NULL	NULL	NULL	NULL	NULL
Dr19687	GO:0004553|GO:0009607|GO:0006950|GO:0005739|GO:0005975	EC:3.2.1.0	beta- -glucanase	IPR000490|IPR017853|IPR013781	Glycoside hydrolase, family 17|Glycoside hydrolase, superfamily|Glycoside hydrolase, catalytic domain	GO:0004553|GO:0005975|GO:0003824	EC:3.2.1.39	KEGG: 00500+3.2.1.39
Dr25736	NULL	NULL	NULL	NULL	NULL	NULL	NULL	NULL
Dr19709	NULL	NULL	NULL	NULL	NULL	NULL	NULL	NULL
Dr19718	GO:0016023|GO:0042973|GO:0005982|GO:0005985	EC:3.2.1.39	glycosyl hydrolase family 17 protein	IPR000490|IPR017853|IPR013781	Glycoside hydrolase, family 17|Glycoside hydrolase, superfamily|Glycoside hydrolase, catalytic domain	GO:0004553|GO:0005975|GO:0003824	EC:3.2.1.39	KEGG: 00500+3.2.1.39
Dr19764	NULL	NULL	NULL	IPR001611	Leucine-rich repeat	GO:0005515	NULL	NULL
Dr19726	NULL	NULL	NULL	NULL	NULL	NULL	NULL	NULL
Dr19763	NULL	NULL	NULL	IPR004252	Probable transposase, Ptta/En/Spm, plant	NULL	NULL	NULL
Dr19769	GO:0016023|GO:0008152|GO:0008236	NULL	subtilisin-like protease	IPR015500|IPR000209	Peptidase S8, subtilisin-related|Peptidase S8/S53 domain	GO:0004252|GO:0006508	NULL	NULL
Dr19732	NULL	NULL	NULL	NULL	NULL	NULL	NULL	NULL
Dr19745	GO:0005488	NULL	splicing factor 1	IPR004088|IPR000504|IPR012677|IPR004087	K Homology domain, type 1|RNA recognition motif domain|Nucleotide-binding, alpha-beta plait|K Homology domain	GO:0003723|GO:0003676|GO:0000166	NULL	NULL
Dr19779	GO:0003824	NULL	serine threonine-protein kinase	IPR001611	Leucine-rich repeat	GO:0005515	NULL	NULL
Dr19782	NULL	NULL	NULL	IPR025287	Wall-associated receptor kinase galacturonan-binding domain	GO:0030247	NULL	NULL
Dr19783	GO:0044763|GO:0000166|GO:0043231|GO:0004672|GO:0016310|GO:0050896|GO:0050789|GO:0006464|GO:0044444	NULL	protein kinase xa21	IPR001611|IPR013210|IPR003591	Leucine-rich repeat|Leucine-rich repeat-containing N-terminal, type 2|Leucine-rich repeat, typical subtype	GO:0005515	NULL	NULL
Dr19825	NULL	NULL	NULL	IPR008802	Rubber elongation factor	NULL	NULL	NULL
Dr05728	NULL	NULL	NULL	NULL	NULL	NULL	NULL	NULL
Dr05729	GO:0044710|GO:0016620	EC:1.2.1.0	aldehyde dehydrogenase	NULL	NULL	NULL	NULL	NULL
Dr05714	NULL	NULL	NULL	NULL	NULL	NULL	NULL	NULL
Dr05722	GO:0003713|GO:0003677|GO:0006355|GO:0005667|GO:0045941	NULL	rna polymerase ii transcriptional coactivator kelp	NULL	NULL	NULL	NULL	NULL
Dr05751	GO:0009908|GO:0051093|GO:0006355|GO:0003676|GO:0009742|GO:0003700|GO:0044767|GO:0010073|GO:0005667|GO:0045449	NULL	dna binding protein	NULL	NULL	NULL	NULL	NULL
Dr05763	GO:0016787	NULL	subtilisin-like protease sdd1-like	NULL	NULL	NULL	NULL	NULL
Dr05782	GO:0016787	NULL	cysteine proteinase	NULL	NULL	NULL	NULL	NULL
Dr05787	GO:0003824	NULL	cysteine protease	NULL	NULL	NULL	NULL	NULL
Dr05796	GO:0016787	NULL	cysteine proteinase	NULL	NULL	NULL	NULL	NULL
Dr05777	NULL	NULL	NULL	NULL	NULL	NULL	NULL	NULL
Dr05790	GO:0043231|GO:0044444|GO:0008234|GO:0006508	NULL	cysteine protease 1 precursor	NULL	NULL	NULL	NULL	NULL
Dr05791	GO:0004623|GO:0016023|GO:0004197|GO:0006508|GO:0009395	EC:3.1.1.4|EC:3.4.22.0	cysteine proteinase	NULL	NULL	NULL	NULL	NULL
Dr05829	GO:0044238|GO:0034645|GO:0010467	NULL	transcription initiation factor tfiid subunit 5-like	NULL	NULL	NULL	NULL	NULL
Dr05832	GO:0004672|GO:0016023|GO:0016310	NULL	probable leucine-rich repeat receptor-like protein kinase at5g49770-like	NULL	NULL	NULL	NULL	NULL
Dr05822	GO:0005739	NULL	nac domain containing protein 87	NULL	NULL	NULL	NULL	NULL
Dr05848	GO:0009987|GO:0055114|GO:0046914|GO:0044699|GO:0016491|GO:0016023	NULL	cytochrome p450	NULL	NULL	NULL	NULL	NULL
Dr05857	NULL	NULL	NULL	NULL	NULL	NULL	NULL	NULL
Dr05860	GO:0004672|GO:0016023|GO:0016310|GO:0016020	NULL	probable lrr receptor-like serine threonine-protein kinase at1g06840-like	NULL	NULL	NULL	NULL	NULL
Dr19861	NULL	NULL	NULL	NULL	NULL	NULL	NULL	NULL
Dr19865	GO:0005488|GO:0043231|GO:0006950	NULL	glyceraldehyde-3-phosphate dehydrogenase	IPR020831|IPR020828|IPR020829|IPR016040	Glyceraldehyde/Erythrose phosphate dehydrogenase family|Glyceraldehyde 3-phosphate dehydrogenase, NAD(P) binding domain|Glyceraldehyde 3-phosphate dehydrogenase, catalytic domain|NAD(P)-binding domain	GO:0016620|GO:0055114	NULL	Reactome: REACT_474
Dr25781	NULL	NULL	NULL	IPR002885|IPR011990	Pentatricopeptide repeat|Tetratricopeptide-like helical	GO:0005515	NULL	NULL
Dr19878	GO:0008152|GO:0016765|GO:0008168	EC:2.5.1.0|EC:2.1.1.0	spermidine synthase	IPR001045	Spermidine/spermine synthases family	GO:0003824	EC:2.5.1.16	KEGG: 00270+2.5.1.16|KEGG: 00330+2.5.1.16|KEGG: 00410+2.5.1.16|KEGG: 00480+2.5.1.16|UniPathway: UPA00248
Dr25785	GO:0016491	NULL	cytochrome p450	IPR001128|IPR002403|IPR017972	Cytochrome P450|Cytochrome P450, E-class, group IV|Cytochrome P450, conserved site	GO:0005506|GO:0016705|GO:0020037|GO:0055114|GO:0004497	NULL	Reactome: REACT_13433
Dr19936	NULL	NULL	NULL	IPR007612|IPR025659	LURP1-like domain|Tubby C-terminal-like domain	NULL	NULL	NULL
Dr19937	NULL	NULL	NULL	IPR007612|IPR025659	LURP1-like domain|Tubby C-terminal-like domain	NULL	NULL	NULL
Dr19907	GO:0005643|GO:0006913|GO:0008565|GO:0006886|GO:0009507	NULL	armadillo beta-catenin-like repeat-containing protein	IPR027140|IPR001494|IPR016024|IPR011989	Importin subunit beta|Importin-beta, N-terminal domain|Armadillo-type fold|Armadillo-like helical	GO:0006913|GO:0008565|GO:0006886|GO:0008536|GO:0005488	NULL	NULL
Dr19928	GO:0004715|GO:0006468|GO:0005524	EC:2.7.10.2	kinase family protein	IPR001245|IPR011009|IPR000719	Serine-threonine/tyrosine-protein kinase catalytic domain|Protein kinase-like domain|Protein kinase domain	GO:0004672|GO:0006468|GO:0016772|GO:0005524	NULL	NULL
Dr25789	GO:0003677|GO:0003682|GO:0000785	NULL	r2r3-myb transcription factor	IPR001005|IPR009057|IPR017930	SANT/Myb domain|Homeodomain-like|Myb domain	GO:0003682|GO:0003677	NULL	NULL
Dr19943	NULL	NULL	NULL	NULL	NULL	NULL	NULL	NULL
Dr19962	GO:0035251|GO:0008152	NULL	udp-glucose: anthocyanidin -o-glucosyltransferase	IPR002213	UDP-glucuronosyl/UDP-glucosyltransferase	GO:0008152|GO:0016758	NULL	NULL
Dr19970	GO:0006200|GO:0005524|GO:0016887|GO:0009624	EC:3.6.1.3	abc transporter family protein	IPR027417	P-loop containing nucleoside triphosphate hydrolase	NULL	NULL	NULL
Dr19969	NULL	NULL	NULL	NULL	NULL	NULL	NULL	NULL
Dr19974	GO:0016491|GO:0044710	NULL	desacetoxyvindoline 4-	IPR005123|IPR027443	Oxoglutarate/iron-dependent dioxygenase|Isopenicillin N synthase-like	GO:0016491|GO:0016706|GO:0055114	NULL	NULL
Dr19975	NULL	NULL	NULL	IPR000558|IPR009072|IPR027443	Histone H2B|Histone-fold|Isopenicillin N synthase-like	GO:0000786|GO:0003677|GO:0005634|GO:0006334|GO:0046982	NULL	NULL
Dr19988	NULL	NULL	NULL	NULL	NULL	NULL	NULL	NULL
Dr19995	NULL	NULL	NULL	IPR018247	EF-Hand 1, calcium-binding site	NULL	NULL	NULL
Dr19997	NULL	NULL	NULL	NULL	NULL	NULL	NULL	NULL
Dr20004	NULL	NULL	NULL	NULL	NULL	NULL	NULL	NULL
Dr20015	NULL	NULL	NULL	NULL	NULL	NULL	NULL	NULL
Dr20037	NULL	NULL	NULL	NULL	NULL	NULL	NULL	NULL
Dr20076	NULL	NULL	NULL	IPR026057|IPR025846	PC-Esterase|PMR5 N-terminal domain	NULL	NULL	NULL
Dr05878	NULL	NULL	NULL	NULL	NULL	NULL	NULL	NULL
Dr05919	NULL	NULL	NULL	NULL	NULL	NULL	NULL	NULL
Dr05925	GO:0006355|GO:0043565|GO:0003700|GO:0005667|GO:0045449	NULL	homeobox protein knotted-	NULL	NULL	NULL	NULL	NULL
Dr05953	GO:0006633|GO:0009941|GO:0009570|GO:0010020|GO:0004315|GO:0016020|GO:0009790|GO:0005835|GO:0042967	EC:2.3.1.41	3-oxoacyl-	NULL	NULL	NULL	NULL	NULL
Dr06023	GO:0016023|GO:0016310|GO:0016301	NULL	protein	IPR000858|IPR001480|IPR001245|IPR013227|IPR011009|IPR013320|IPR002290|IPR003609|IPR024171|IPR000719|IPR017441|IPR008271	S-locus glycoprotein|Bulb-type lectin domain|Serine-threonine/tyrosine-protein kinase catalytic domain|PAN-2 domain|Protein kinase-like domain|Concanavalin A-like lectin/glucanase, subgroup|Serine/threonine- / dual specificity protein kinase, catalytic domain|Apple-like|S-receptor-like serine/threonine-protein kinase|Protein kinase domain|Protein kinase, ATP binding site|Serine/threonine-protein …	GO:0048544|GO:0004672|GO:0006468|GO:0016772|GO:0005524|GO:0004674	NULL	NULL
Dr06006	GO:0016020	NULL	xanthine uracil permease family expressed	IPR006043	Xanthine/uracil/vitamin C permease	GO:0005215|GO:0006810|GO:0016020|GO:0055085	NULL	NULL
Dr06012	GO:0044763|GO:0004672|GO:0016310	NULL	serine threonine protein kinase	IPR001480|IPR001245|IPR013227|IPR011009|IPR013320|IPR002290|IPR003609|IPR024171|IPR000719|IPR017441|IPR008271	Bulb-type lectin domain|Serine-threonine/tyrosine-protein kinase catalytic domain|PAN-2 domain|Protein kinase-like domain|Concanavalin A-like lectin/glucanase, subgroup|Serine/threonine- / dual specificity protein kinase, catalytic domain|Apple-like|S-receptor-like serine/threonine-protein kinase|Protein kinase domain|Protein kinase, ATP binding site|Serine/threonine-protein kinase, active site	GO:0004672|GO:0006468|GO:0016772|GO:0005524|GO:0004674	NULL	NULL
Dr06014	GO:0016301|GO:0009987	NULL	protein	IPR000858|IPR001480|IPR001245|IPR013227|IPR011009|IPR002290|IPR003609|IPR000719|IPR000742|IPR008271	S-locus glycoprotein|Bulb-type lectin domain|Serine-threonine/tyrosine-protein kinase catalytic domain|PAN-2 domain|Protein kinase-like domain|Serine/threonine- / dual specificity protein kinase, catalytic domain|Apple-like|Protein kinase domain|Epidermal growth factor-like domain|Serine/threonine-protein kinase, active site	GO:0048544|GO:0004672|GO:0006468|GO:0016772|GO:0005524|GO:0005515|GO:0004674	NULL	NULL
Dr06015	GO:0097159|GO:0016301|GO:1901363|GO:0044237	NULL	receptor kinase 5	IPR000719|IPR001245|IPR011009|IPR017441	Protein kinase domain|Serine-threonine/tyrosine-protein kinase catalytic domain|Protein kinase-like domain|Protein kinase, ATP binding site	GO:0004672|GO:0005524|GO:0006468|GO:0016772	NULL	NULL
Dr06024	GO:0016772	NULL	protein	IPR000858|IPR001480|IPR001245|IPR013227|IPR011009|IPR013320|IPR003609|IPR000719|IPR000742|IPR017441	S-locus glycoprotein|Bulb-type lectin domain|Serine-threonine/tyrosine-protein kinase catalytic domain|PAN-2 domain|Protein kinase-like domain|Concanavalin A-like lectin/glucanase, subgroup|Apple-like|Protein kinase domain|Epidermal growth factor-like domain|Protein kinase, ATP binding site	GO:0048544|GO:0004672|GO:0006468|GO:0016772|GO:0005524|GO:0005515	NULL	NULL
Dr05944	GO:0050832|GO:0005576|GO:0031640	NULL	thaumatin-like protein	NULL	NULL	NULL	NULL	NULL
Dr06057	NULL	NULL	NULL	NULL	NULL	NULL	NULL	NULL
Dr06082	GO:0044464	NULL	uncharacterized protein	IPR007700|IPR021864	Protein of unknown function DUF668|Protein of unknown function DUF3475	NULL	NULL	NULL
Dr06004	NULL	NULL	NULL	NULL	NULL	NULL	NULL	NULL
Dr06005	GO:0044763|GO:0071704|GO:0016301|GO:0044237|GO:0044424|GO:0009628|GO:0044238|GO:0050789|GO:0006950|GO:1901700|GO:0033993|GO:0009725	NULL	serine threonine-protein kinase srk2e-like isoform 2	IPR011009|IPR017441	Protein kinase-like domain|Protein kinase, ATP binding site	GO:0016772|GO:0005524	NULL	NULL
Dr20084	NULL	NULL	NULL	IPR011707|IPR008972	Multicopper oxidase, type 3|Cupredoxin	GO:0005507	NULL	NULL
Dr25817	NULL	NULL	NULL	NULL	NULL	NULL	NULL	NULL
Dr20145	GO:0016023|GO:0043167|GO:0000166	NULL	cc-nbs-lrr class disease resistance protein	IPR002182|IPR027417	NB-ARC|P-loop containing nucleoside triphosphate hydrolase	GO:0043531	NULL	NULL
Dr20142	GO:1901363|GO:0097159	NULL	disease resistance protein	IPR002182|IPR027417|IPR000767	NB-ARC|Disease resistance protein|P-loop containing nucleoside triphosphate hydrolase	GO:0043531|GO:0006952	NULL	NULL
Dr25821	GO:0046872|GO:0016491	NULL	multi-copper oxidase type i family protein	IPR011706|IPR008972	Multicopper oxidase, type 2|Cupredoxin	GO:0005507|GO:0016491|GO:0055114	NULL	NULL
Dr20174	NULL	NULL	NULL	NULL	NULL	NULL	NULL	NULL
Dr25826	NULL	NULL	NULL	NULL	NULL	NULL	NULL	NULL
Dr20331	NULL	NULL	NULL	NULL	NULL	NULL	NULL	NULL
Dr25844	GO:0052689	EC:3.1.1.0	cell death associated protein	IPR013094	Alpha/beta hydrolase fold-3	GO:0008152|GO:0016787	NULL	NULL
Dr20341	GO:0044237|GO:0016020|GO:0044424	NULL	photosystem ii protein d1	IPR000484	Photosynthetic reaction centre, L/M	GO:0009772|GO:0019684|GO:0045156	NULL	MetaCyc: PWY-101|MetaCyc: PWY-6785
Dr20342	GO:0034357|GO:0015979|GO:0009536|GO:0055114|GO:0006091	NULL	photosystem ii d1 protein	IPR000484	Photosynthetic reaction centre, L/M	GO:0009772|GO:0019684|GO:0045156	NULL	MetaCyc: PWY-101|MetaCyc: PWY-6785
Dr20356	GO:0046961|GO:0046933|GO:0015991|GO:0005743|GO:0045261|GO:0015986|GO:0005524|GO:0006119	NULL	atpase subunit 1	IPR000793	ATPase, F1/V1/A1 complex, alpha/beta subunit, C-terminal	GO:0015991|GO:0016820|GO:0033178	EC:3.6.3.14	KEGG: 00190+3.6.3.14|KEGG: 00195+3.6.3.14|MetaCyc: PWY-7219
Dr20344	GO:0006461|GO:0016020|GO:0005739	NULL	cytochrome c biogenesis c	IPR002541	Cytochrome c assembly protein	GO:0006461|GO:0008535|GO:0016020	NULL	NULL
Dr20357	GO:0046961|GO:0046933|GO:0015991|GO:0045261|GO:0015986|GO:0005524|GO:0005739|GO:0006119	NULL	f1-atpase alpha subunit	IPR000194|IPR004100|IPR027417|IPR023366|IPR005294	ATPase, F1/V1/A1 complex, alpha/beta subunit, nucleotide-binding domain|ATPase, F1 complex alpha/beta subunit, N-terminal domain|P-loop containing nucleoside triphosphate hydrolase|ATP synthase subunit alpha-like domain|ATPase, F1 complex, alpha subunit	GO:0005524|GO:0015992|GO:0046034|GO:0015986|GO:0045261|GO:0046933|GO:0046961	EC:3.6.3.14	KEGG: 00190+3.6.3.14|KEGG: 00195+3.6.3.14|MetaCyc: PWY-7219
Dr20367	GO:0003964|GO:0006278|GO:0003723|GO:0006397|GO:0005739	EC:2.7.7.49	maturase	IPR000477	Reverse transcriptase	GO:0003723|GO:0003964|GO:0006278	NULL	NULL
Dr20368	GO:0005739	NULL	orf186 gene product	NULL	NULL	NULL	NULL	NULL
Dr20372	NULL	NULL	NULL	NULL	NULL	NULL	NULL	NULL
Dr20380	NULL	NULL	NULL	NULL	NULL	NULL	NULL	NULL
Dr20348	GO:0016023|GO:0043623|GO:0016020|GO:0005739	NULL	cytochrome c biogenesis fn	IPR002541|IPR003567|IPR003569	Cytochrome c assembly protein|Cytochrome c-type biogenesis protein|Cytochrome c-type biogenesis protein CcbS	GO:0006461|GO:0008535|GO:0016020|GO:0015232|GO:0015886|GO:0017004	NULL	NULL
Dr20360	NULL	NULL	NULL	NULL	NULL	NULL	NULL	NULL
Dr20371	GO:0008535|GO:0017004|GO:0015886|GO:0015232|GO:0016020|GO:0005739	NULL	cytochrome c biogenesis c	IPR002541|IPR003557	Cytochrome c assembly protein|Cytochrome c-type biogenesis protein CcmC	GO:0006461|GO:0008535|GO:0016020|GO:0015232|GO:0015886|GO:0017004	NULL	NULL
Dr20373	GO:0015992|GO:0000166|GO:0019829|GO:0015078|GO:0006754|GO:0034220|GO:0000275|GO:0044769	NULL	atpase subunit 1	IPR000194|IPR004100|IPR027417|IPR023366	ATPase, F1/V1/A1 complex, alpha/beta subunit, nucleotide-binding domain|ATPase, F1 complex alpha/beta subunit, N-terminal domain|P-loop containing nucleoside triphosphate hydrolase|ATP synthase subunit alpha-like domain	GO:0005524|GO:0015992|GO:0046034	EC:3.6.3.14	KEGG: 00190+3.6.3.14|KEGG: 00195+3.6.3.14|MetaCyc: PWY-7219
Dr20374	GO:0043234|GO:0008535|GO:0017004|GO:0005743|GO:0015886|GO:0015232	NULL	cytochrome c biogenesis fn	IPR002541|IPR003567	Cytochrome c assembly protein|Cytochrome c-type biogenesis protein	GO:0006461|GO:0008535|GO:0016020|GO:0015232|GO:0015886|GO:0017004	NULL	NULL
Dr20383	GO:0006120|GO:0008137|GO:0005747|GO:0006744|GO:0006814|GO:0015992	EC:1.6.5.3	nadh dehydrogenase subunit 4	NULL	NULL	NULL	NULL	NULL
Dr20387	GO:0006461	NULL	cytochrome c biogenesis fn	IPR002541|IPR003567	Cytochrome c assembly protein|Cytochrome c-type biogenesis protein	GO:0006461|GO:0008535|GO:0016020|GO:0015232|GO:0015886|GO:0017004	NULL	NULL
Dr20388	GO:0006120|GO:0051287|GO:0048038|GO:0008137|GO:0005747|GO:0006744|GO:0006814|GO:0015992	EC:1.6.5.3	nadh dehydrogenase subunit 7	IPR001135	NADH-quinone oxidoreductase, subunit D	GO:0016651|GO:0048038|GO:0051287|GO:0055114	NULL	NULL
Dr20389	GO:0008152|GO:0044424	NULL	photosystem ii reaction center protein d1	IPR000484	Photosynthetic reaction centre, L/M	GO:0009772|GO:0019684|GO:0045156	NULL	MetaCyc: PWY-101|MetaCyc: PWY-6785
Dr25849	NULL	NULL	NULL	NULL	NULL	NULL	NULL	NULL
Dr20393	NULL	NULL	NULL	IPR002885|IPR011990	Pentatricopeptide repeat|Tetratricopeptide-like helical	GO:0005515	NULL	NULL
Dr06121	GO:0044765|GO:0022857	NULL	inorganic phosphate transporter 1-11-like	NULL	NULL	NULL	NULL	NULL
Dr06144	NULL	NULL	NULL	NULL	NULL	NULL	NULL	NULL
Dr06135	GO:0005488|GO:0016020	NULL	mlo-like protein 4-like	IPR004326	Mlo-related protein	GO:0006952|GO:0016021	NULL	NULL
Dr20395	NULL	NULL	NULL	NULL	NULL	NULL	NULL	NULL
Dr20407	NULL	NULL	NULL	IPR003657	DNA-binding WRKY	GO:0003700|GO:0006355|GO:0043565	NULL	NULL
Dr20445	GO:0009536	NULL	3-oxoacyl-synthase i	IPR014030|IPR016039|IPR016038	Beta-ketoacyl synthase, N-terminal|Thiolase-like|Thiolase-like, subgroup	GO:0003824|GO:0008152	NULL	NULL
Dr20543	NULL	NULL	NULL	NULL	NULL	NULL	NULL	NULL
Dr20544	GO:0016020|GO:0016023|GO:0017004|GO:0005739|GO:0008535	NULL	cytochrome c biogenesis fc	NULL	NULL	NULL	NULL	NULL
Dr20542	GO:0005840|GO:0003735|GO:0006412|GO:0005739|GO:0042254	NULL	small subunit ribosomal protein	IPR001971	Ribosomal protein S11	GO:0003735|GO:0005840|GO:0006412	NULL	NULL
Dr20545	GO:0005763|GO:0003735|GO:0006412|GO:0042254	NULL	ribosomal protein s1	NULL	NULL	NULL	NULL	NULL
Dr20537	GO:0005739|GO:0016020	NULL	cytochrome c biogenesis fc	NULL	NULL	NULL	NULL	NULL
Dr20548	NULL	NULL	NULL	NULL	NULL	NULL	NULL	NULL
Dr20552	NULL	NULL	NULL	NULL	NULL	NULL	NULL	NULL
Dr20563	NULL	NULL	NULL	NULL	NULL	NULL	NULL	NULL
Dr20564	NULL	NULL	NULL	NULL	NULL	NULL	NULL	NULL
Dr20575	NULL	NULL	NULL	NULL	NULL	NULL	NULL	NULL
Dr25872	GO:0016740	NULL	g-type lectin s-receptor-like serine threonine-protein kinase rlk1-like	IPR000858|IPR001480|IPR011009|IPR003609|IPR017441	S-locus glycoprotein|Bulb-type lectin domain|Protein kinase-like domain|Apple-like|Protein kinase, ATP binding site	GO:0048544|GO:0016772|GO:0005524	NULL	NULL
Dr25876	NULL	NULL	NULL	NULL	NULL	NULL	NULL	NULL
Dr06150	GO:0003676|GO:0030247|GO:0016023|GO:0006468|GO:0005524|GO:0008270|GO:0004674|GO:0009069	EC:2.7.11.0	probable receptor-like protein kinase at1g67000-like	IPR001245|IPR011009|IPR002290|IPR000719|IPR017441|IPR008271	Serine-threonine/tyrosine-protein kinase catalytic domain|Protein kinase-like domain|Serine/threonine- / dual specificity protein kinase, catalytic domain|Protein kinase domain|Protein kinase, ATP binding site|Serine/threonine-protein kinase, active site	GO:0004672|GO:0006468|GO:0016772|GO:0005524|GO:0004674	NULL	NULL
Dr06184	GO:0009987|GO:0016301	NULL	mitogen-activated protein kinase kinase kinase a-like	IPR000719|IPR011009|IPR002290|IPR008271	Protein kinase domain|Protein kinase-like domain|Serine/threonine- / dual specificity protein kinase, catalytic domain|Serine/threonine-protein kinase, active site	GO:0004672|GO:0005524|GO:0006468|GO:0016772|GO:0004674	NULL	NULL
Dr06203	GO:0048364|GO:0005739|GO:0048468|GO:0009653|GO:0003006	NULL	rho guanine nucleotide exchange factor 8-like	IPR005512	PRONE domain	GO:0005089	NULL	NULL
Dr06237	NULL	NULL	NULL	NULL	NULL	NULL	NULL	NULL
Dr06173	NULL	NULL	NULL	IPR002100	Transcription factor, MADS-box	GO:0003677|GO:0046983	NULL	Reactome: REACT_21303
Dr06316	GO:0004672	NULL	cell division cycle 2-like protein	IPR000719|IPR011009|IPR002290|IPR017441|IPR008271	Protein kinase domain|Protein kinase-like domain|Serine/threonine- / dual specificity protein kinase, catalytic domain|Protein kinase, ATP binding site|Serine/threonine-protein kinase, active site	GO:0004672|GO:0005524|GO:0006468|GO:0016772|GO:0004674	NULL	NULL
Dr06317	GO:0004672	NULL	cell division cycle 2-like protein	IPR000719|IPR011009|IPR002290|IPR017441|IPR008271	Protein kinase domain|Protein kinase-like domain|Serine/threonine- / dual specificity protein kinase, catalytic domain|Protein kinase, ATP binding site|Serine/threonine-protein kinase, active site	GO:0004672|GO:0005524|GO:0006468|GO:0016772|GO:0004674	NULL	NULL
Dr06324	NULL	NULL	NULL	NULL	NULL	NULL	NULL	NULL
Dr06328	NULL	NULL	NULL	NULL	NULL	NULL	NULL	NULL
Dr06220	GO:0043229	NULL	kinesin-like protein kif2a-like	IPR027640|IPR001752|IPR027417|IPR019821	Kinesin-like protein|Kinesin, motor domain|P-loop containing nucleoside triphosphate hydrolase|Kinesin, motor region, conserved site	GO:0003777|GO:0005871|GO:0007018|GO:0005524|GO:0008017	NULL	NULL
Dr06227	GO:0017111|GO:0000166|GO:0016020	EC:3.6.1.15	abc transporter g family member	IPR013525	ABC-2 type transporter	GO:0016020	NULL	NULL
Dr06244	GO:0009987|GO:0006810|GO:0044710|GO:0016887|GO:0000166|GO:0016020	EC:3.6.1.3	multidrug resistance-associated protein 3 ( 3) abc-	IPR003439|IPR001140|IPR027417|IPR011527|IPR003593|IPR017871	ABC transporter-like|ABC transporter, transmembrane domain|P-loop containing nucleoside triphosphate hydrolase|ABC transporter type 1, transmembrane domain|AAA+ ATPase domain|ABC transporter, conserved site	GO:0005524|GO:0016887|GO:0006810|GO:0016021|GO:0042626|GO:0055085|GO:0000166|GO:0017111	NULL	NULL
Dr06245	GO:0009987|GO:0006810|GO:0016887|GO:0000166|GO:0016020	EC:3.6.1.3	multidrug-resistance associated protein	IPR003439|IPR001140|IPR027417|IPR011527|IPR003593|IPR017871	ABC transporter-like|ABC transporter, transmembrane domain|P-loop containing nucleoside triphosphate hydrolase|ABC transporter type 1, transmembrane domain|AAA+ ATPase domain|ABC transporter, conserved site	GO:0005524|GO:0016887|GO:0006810|GO:0016021|GO:0042626|GO:0055085|GO:0000166|GO:0017111	NULL	NULL
Dr06256	NULL	NULL	NULL	IPR002182|IPR027417	NB-ARC|P-loop containing nucleoside triphosphate hydrolase	GO:0043531	NULL	NULL
Dr06262	GO:0008152|GO:0050896|GO:0016758	EC:2.4.1.0	udp-glucoronosyl udp-glucosyl transferase family protein	NULL	NULL	NULL	NULL	NULL
Dr06265	GO:0016758	EC:2.4.1.0	hydroquinone glucosyltransferase	IPR002213	UDP-glucuronosyl/UDP-glucosyltransferase	GO:0008152|GO:0016758	NULL	NULL
Dr06266	GO:0006805|GO:0035251	NULL	hydroquinone glucosyltransferase	IPR002213	UDP-glucuronosyl/UDP-glucosyltransferase	GO:0008152|GO:0016758	NULL	NULL
Dr06387	GO:0009825|GO:0009729|GO:0046827|GO:0005829|GO:0042538|GO:0009965|GO:0006468|GO:0004674|GO:0009742|GO:0005886|GO:0005524|GO:0050321|GO:0009733|GO:0009069	EC:2.7.11.0|EC:2.7.11.26	shaggy-related protein kinase eta	IPR000719|IPR011009|IPR002290|IPR017441|IPR008271	Protein kinase domain|Protein kinase-like domain|Serine/threonine- / dual specificity protein kinase, catalytic domain|Protein kinase, ATP binding site|Serine/threonine-protein kinase, active site	GO:0004672|GO:0005524|GO:0006468|GO:0016772|GO:0004674	NULL	NULL
Dr06404	GO:0044763	NULL	n-terminal domain containing protein	IPR006671|IPR013763|IPR018316	Cyclin, N-terminal|Cyclin-like|Tubulin/FtsZ, 2-layer sandwich domain	GO:0003924|GO:0005525|GO:0006184|GO:0043234|GO:0051258	NULL	NULL
Dr06431	GO:0009725|GO:0043232|GO:0044446|GO:0044444|GO:0000151|GO:0005634	NULL	cullin 1	IPR001373|IPR019559|IPR016159|IPR016158|IPR011991	Cullin, N-terminal|Cullin protein, neddylation domain|Cullin repeat-like-containing domain|Cullin homology|Winged helix-turn-helix DNA-binding domain	GO:0006511|GO:0031461|GO:0031625	NULL	UniPathway: UPA00143
Dr06489	NULL	NULL	NULL	IPR001932	Protein phosphatase 2C (PP2C)-like domain	GO:0003824	NULL	NULL
Dr06427	GO:0016020|GO:0044765|GO:0042626|GO:0006200|GO:0005524	NULL	atp-binding cassette	NULL	NULL	NULL	NULL	NULL
Dr06441	GO:0006457|GO:0046686|GO:0005886|GO:0000413|GO:0009507|GO:0048046|GO:0003755	EC:5.2.1.8	cyclophilin	IPR002130|IPR024936|IPR020892	Cyclophilin-like peptidyl-prolyl cis-trans isomerase domain|Cyclophilin-type peptidyl-prolyl cis-trans isomerase|Cyclophilin-type peptidyl-prolyl cis-trans isomerase, conserved site	GO:0003755|GO:0006457	NULL	NULL
Dr06477	GO:0003677	NULL	dna-binding protein escarola-like	IPR005175	Domain of unknown function DUF296	NULL	NULL	NULL
Dr06492	NULL	NULL	NULL	NULL	NULL	NULL	NULL	NULL
Dr06507	GO:0009611|GO:0004792|GO:0009753|GO:0009507|GO:0006979	EC:2.8.1.1	senescence-associated protein	IPR001763	Rhodanese-like domain	NULL	NULL	NULL
Dr25885	NULL	NULL	NULL	NULL	NULL	NULL	NULL	NULL
Dr20695	NULL	NULL	NULL	NULL	NULL	NULL	NULL	NULL
Dr20697	GO:0050896|GO:0010334|GO:0046872|GO:0016114|GO:0009507	NULL	low quality protein: myrcene chloroplastic-like	IPR001906|IPR008930	Terpene synthase, N-terminal domain|Terpenoid cyclases/protein prenyltransferase alpha-alpha toroid	GO:0008152|GO:0010333|GO:0016829	NULL	NULL
Dr20703	NULL	NULL	NULL	NULL	NULL	NULL	NULL	NULL
Dr20716	GO:0004697|GO:0006468|GO:0016702|GO:0005524|GO:0016829|GO:0009507|GO:0007165|GO:0009069	EC:2.7.11.13|EC:1.13.11.0	glyoxalase bleomycin resistance protein dioxygenase	IPR004360|IPR011009|IPR000961|IPR017441	Glyoxalase/fosfomycin resistance/dioxygenase domain|Protein kinase-like domain|AGC-kinase, C-terminal|Protein kinase, ATP binding site	GO:0016772|GO:0004674|GO:0005524|GO:0006468	NULL	NULL
Dr20714	NULL	NULL	NULL	NULL	NULL	NULL	NULL	NULL
Dr20766	GO:0009987|GO:0044699	NULL	ap2 domain-containing transcription factor	IPR001471|IPR016177	AP2/ERF domain|DNA-binding domain	GO:0003700|GO:0006355|GO:0003677	NULL	NULL
Dr20768	GO:0009987|GO:0044699	NULL	ap2 domain-containing transcription factor	IPR001471|IPR016177	AP2/ERF domain|DNA-binding domain	GO:0003700|GO:0006355|GO:0003677	NULL	NULL
Dr20801	GO:0009978|GO:0009753|GO:0055114|GO:0009620|GO:0005739|GO:0009611|GO:0009941|GO:0016705|GO:0009055|GO:0009535|GO:0047987|GO:0010287|GO:0020037|GO:0005506|GO:0031408|GO:0006118	EC:4.2.1.92	allene oxide synthase	IPR001128	Cytochrome P450	GO:0005506|GO:0016705|GO:0020037|GO:0055114	NULL	Reactome: REACT_13433
Dr20802	GO:0050896|GO:0044710|GO:0046872|GO:0016491|GO:0009579|GO:0016020|GO:0016836|GO:0044434	EC:4.2.1.0	allene oxide synthase	IPR001128|IPR002403	Cytochrome P450|Cytochrome P450, E-class, group IV	GO:0005506|GO:0016705|GO:0020037|GO:0055114|GO:0004497	NULL	Reactome: REACT_13433
Dr20804	GO:0016023	NULL	gdsl esterase lipase	IPR001087|IPR013831	Lipase, GDSL|SGNH hydrolase-type esterase domain	GO:0006629|GO:0016788|GO:0016787	NULL	NULL
Dr20812	GO:0016788|GO:0016023|GO:0005739|GO:0006629	NULL	anter-specific proline-rich protein apg	IPR013831	SGNH hydrolase-type esterase domain	GO:0016787	NULL	NULL
Dr20816	GO:0016023	NULL	gdsl esterase lipase	IPR013831	SGNH hydrolase-type esterase domain	GO:0016787	NULL	NULL
Dr20805	NULL	NULL	NULL	IPR001087|IPR013831	Lipase, GDSL|SGNH hydrolase-type esterase domain	GO:0006629|GO:0016788|GO:0016787	NULL	NULL
Dr25911	GO:0044424|GO:0009987	NULL	alpha-tubulin	IPR000217|IPR003008	Tubulin|Tubulin/FtsZ, GTPase domain	GO:0005874|GO:0007017	NULL	NULL
Dr06515	NULL	NULL	NULL	NULL	NULL	NULL	NULL	NULL
Dr06543	GO:0009501|GO:0009011|GO:0019252|GO:0009507|GO:2001070|GO:0005985	EC:2.4.1.21	starch synthase 3	IPR001296	Glycosyl transferase, family 1	GO:0009058	NULL	NULL
Dr06541	GO:0006457|GO:0000413|GO:0003755|GO:0005622|GO:0008270	EC:5.2.1.8	peptidyl-prolyl cis-trans isomerase	IPR002130	Cyclophilin-like peptidyl-prolyl cis-trans isomerase domain	GO:0003755|GO:0006457	NULL	NULL
Dr06549	NULL	NULL	NULL	NULL	NULL	NULL	NULL	NULL
Dr06593	GO:0008233|GO:0016023|GO:0005739	NULL	subtilisin-like protease sdd1-like	IPR015500|IPR000209	Peptidase S8, subtilisin-related|Peptidase S8/S53 domain	GO:0004252|GO:0006508	NULL	NULL
Dr06564	GO:0005739	NULL	pentatricopeptide repeat-containing protein	IPR002885|IPR011990	Pentatricopeptide repeat|Tetratricopeptide-like helical	GO:0005515	NULL	NULL
Dr06559	NULL	NULL	NULL	NULL	NULL	NULL	NULL	NULL
Dr06560	NULL	NULL	NULL	NULL	NULL	NULL	NULL	NULL
Dr06597	NULL	NULL	NULL	IPR001480	Bulb-type lectin domain	NULL	NULL	NULL
Dr06598	GO:0003743|GO:0005634|GO:0005829|GO:0000166|GO:0005840|GO:0006446	NULL	eukaryotic translation initiation factor 3 subunit b	IPR011400|IPR013979	Eukaryotic translation initiation factor 3 subunit B|Translation initiation factor, beta propellor-like domain	GO:0003723|GO:0003743|GO:0005852|GO:0006413|GO:0031369	NULL	NULL
Dr06563	NULL	NULL	NULL	NULL	NULL	NULL	NULL	NULL
Dr06570	NULL	NULL	NULL	IPR000211|IPR000657	Geminivirus BL1 movement protein|Geminivirus AL3 coat protein	GO:0003677|GO:0033644|GO:0046740|GO:0016032	NULL	NULL
Dr06573	NULL	NULL	NULL	IPR002160|IPR011065	Proteinase inhibitor I3, Kunitz legume|Kunitz inhibitor ST1-like	GO:0004866	NULL	NULL
Dr06578	GO:0044763|GO:0042254	NULL	sda1-like protein	IPR027312|IPR012977	Sda1|Uncharacterised domain NUC130/133, N-terminal	GO:0000055|GO:0030036|GO:0042273	NULL	NULL
Dr06582	NULL	NULL	NULL	NULL	NULL	NULL	NULL	NULL
Dr06583	GO:0005507|GO:0005618|GO:0005840|GO:0005739|GO:0006098|GO:0009651|GO:0004807|GO:0006096|GO:0009570|GO:0006094|GO:0010043|GO:0005773|GO:0046686|GO:0005886|GO:0048046|GO:0006000|GO:0006013|GO:0006020|GO:0015976|GO:0046486	EC:5.3.1.1	triosephosphate isomerase	IPR000652|IPR013785	Triosephosphate isomerase|Aldolase-type TIM barrel	GO:0004807|GO:0008152|GO:0003824	EC:5.3.1.1	KEGG: 00010+5.3.1.1|KEGG: 00051+5.3.1.1|KEGG: 00562+5.3.1.1|KEGG: 00710+5.3.1.1|MetaCyc: PWY-1042|MetaCyc: PWY-5484|MetaCyc: PWY-6142|MetaCyc: PWY-7003|UniPathway: UPA00109|UniPathway: UPA00138
Dr20841	GO:0046961|GO:0046933|GO:0015991|GO:0005743|GO:0045261|GO:0015986|GO:0005524|GO:0006119	NULL	atpase subunit 1	IPR000194|IPR000793|IPR027417	ATPase, F1/V1/A1 complex, alpha/beta subunit, nucleotide-binding domain|ATPase, F1/V1/A1 complex, alpha/beta subunit, C-terminal|P-loop containing nucleoside triphosphate hydrolase	GO:0005524|GO:0015991|GO:0016820|GO:0033178	EC:3.6.3.14	KEGG: 00190+3.6.3.14|KEGG: 00195+3.6.3.14|MetaCyc: PWY-7219
Dr20842	GO:0046961|GO:0046933|GO:0015991|GO:0045261|GO:0015986|GO:0005524|GO:0005739|GO:0006119	NULL	atp synthase f1 subunit 1	IPR004100|IPR023366	ATPase, F1 complex alpha/beta subunit, N-terminal domain|ATP synthase subunit alpha-like domain	GO:0015992|GO:0046034	EC:3.6.3.14	KEGG: 00190+3.6.3.14|KEGG: 00195+3.6.3.14|MetaCyc: PWY-7219
Dr20861	NULL	NULL	NULL	NULL	NULL	NULL	NULL	NULL
Dr20848	GO:0016772	NULL	s-locus-specific glycoprotein s6	IPR000858|IPR001480	S-locus glycoprotein|Bulb-type lectin domain	GO:0048544	NULL	NULL
Dr20863	GO:0031408|GO:0005506|GO:0009507|GO:0016165|GO:0055114	EC:1.13.11.12	lipoxygenase	IPR000907|IPR001360|IPR013819|IPR001024|IPR008976|IPR017853|IPR013781|IPR027433|IPR001246|IPR020834|IPR018120|IPR020833	Lipoxygenase|Glycoside hydrolase, family 1|Lipoxygenase, C-terminal|PLAT/LH2 domain|Lipoxygenase, plant|Lipase/lipooxygenase, PLAT/LH2|Glycoside hydrolase, superfamily|Glycoside hydrolase, catalytic domain|Lipoxygenase, domain 3|Lipoxygenase, conserved site|Glycoside hydrolase, family 1, active site|Lipoxygenase, iron binding site	GO:0016702|GO:0046872|GO:0055114|GO:0004553|GO:0005975|GO:0005515|GO:0003824|GO:0005506|GO:0016165	NULL	UniPathway: UPA00382
Dr20864	GO:0005730|GO:0009941|GO:0005773|GO:0015865|GO:0005743|GO:0005507|GO:0005886|GO:0005618|GO:0055085|GO:0016021|GO:0005215	NULL	atp adp translocator	IPR018108|IPR023395	Mitochondrial substrate/solute carrier|Mitochondrial carrier domain	NULL	NULL	NULL
Dr20871	NULL	NULL	NULL	NULL	NULL	NULL	NULL	NULL
Dr20874	GO:0046872|GO:0016491|GO:0070469|GO:0009055|GO:0016021|GO:0022904|GO:0005739|GO:0006118	NULL	apocytochrome b	IPR016175|IPR005798|IPR005797|IPR022803|IPR016174|IPR027387	Cytochrome b/b6|Cytochrome b/b6, C-terminal|Cytochrome b/b6, N-terminal|Ribosomal protein L5 domain|Di-haem cytochrome, transmembrane|Cytochrome b/b6-like domain	GO:0016020|GO:0022904|GO:0009055|GO:0016491	NULL	NULL
Dr20872	GO:0005763|GO:0003676|GO:0003735|GO:0006412|GO:0042254	NULL	ribosomal protein s12	IPR006032|IPR012340|IPR005679	Ribosomal protein S12/S23|Ribosomal protein S12, bacteria|Nucleic acid-binding, OB-fold	GO:0003735|GO:0005622|GO:0005840|GO:0006412|GO:0015935	NULL	NULL
Dr25923	NULL	NULL	NULL	NULL	NULL	NULL	NULL	NULL
Dr20898	NULL	NULL	NULL	NULL	NULL	NULL	NULL	NULL
Dr20902	GO:0005730|GO:0008235|GO:0003677|GO:0005886|GO:0004177|GO:0009987|GO:0006508	EC:3.4.11.0	proliferation-associated protein 2g4	IPR000994|IPR001714	Peptidase M24, structural domain|Peptidase M24, methionine aminopeptidase	GO:0009987|GO:0004177|GO:0006508|GO:0008235	NULL	NULL
Dr20904	NULL	NULL	NULL	IPR004873	BURP domain	NULL	NULL	NULL
Dr20905	GO:0016491|GO:0016023	NULL	cytochrome p450 94a1-like	IPR001128|IPR002401|IPR017972	Cytochrome P450|Cytochrome P450, E-class, group I|Cytochrome P450, conserved site	GO:0005506|GO:0016705|GO:0020037|GO:0055114	NULL	Reactome: REACT_13433
Dr20907	NULL	NULL	NULL	NULL	NULL	NULL	NULL	NULL
Dr20986	GO:0006629|GO:0016788	NULL	gdsl esterase lipase	IPR013831	SGNH hydrolase-type esterase domain	GO:0016787	NULL	NULL
Dr20977	GO:0005739	NULL	protein gdap2 homolog	IPR002589	Macro domain	NULL	NULL	NULL
Dr20982	NULL	NULL	NULL	IPR015414	SNARE associated Golgi protein	NULL	NULL	NULL
Dr20983	GO:0035251	NULL	protein	NULL	NULL	NULL	NULL	NULL
Dr20984	GO:0050275|GO:0042802|GO:0009805|GO:0009809|GO:0009811	EC:2.4.1.128	udp-	IPR002213	UDP-glucuronosyl/UDP-glucosyltransferase	GO:0008152|GO:0016758	NULL	NULL
Dr06617	GO:0043231	NULL	wd-40 repeat family protein	IPR001680|IPR017986|IPR015943	WD40 repeat|WD40-repeat-containing domain|WD40/YVTN repeat-like-containing domain	GO:0005515	NULL	NULL
Dr06606	NULL	NULL	NULL	NULL	NULL	NULL	NULL	NULL
Dr06655	GO:0004806|GO:0004091|GO:0016042|GO:0046486	EC:3.1.1.3|EC:3.1.1.1	calmodulin-binding heat-shock protein	IPR002921|IPR005592	Lipase, class 3|Mono-/di-acylglycerol lipase, N-terminal	GO:0004806|GO:0006629|GO:0004091|GO:0016042	NULL	Reactome: REACT_14797|Reactome: REACT_604
Dr06631	GO:0008026|GO:0006260|GO:0003677|GO:0005524	NULL	dead box atp-dependent rna	IPR017986|IPR015943|IPR001680	WD40-repeat-containing domain|WD40/YVTN repeat-like-containing domain|WD40 repeat	GO:0005515	NULL	NULL
Dr06629	NULL	NULL	NULL	IPR001480	Bulb-type lectin domain	NULL	NULL	NULL
Dr06630	NULL	NULL	NULL	NULL	NULL	NULL	NULL	NULL
Dr06642	NULL	NULL	NULL	NULL	NULL	NULL	NULL	NULL
Dr06646	NULL	NULL	NULL	IPR006501	Pectinesterase inhibitor domain	GO:0004857|GO:0030599	EC:3.1.1.11	KEGG: 00040+3.1.1.11|KEGG: 00500+3.1.1.11|MetaCyc: PWY-1081|MetaCyc: PWY-7243|MetaCyc: PWY-7246|MetaCyc: PWY-7248|UniPathway: UPA00545
Dr06652	NULL	NULL	NULL	IPR007493	Protein of unknown function DUF538	NULL	NULL	NULL
Dr06661	NULL	NULL	NULL	IPR002182|IPR027417|IPR000767	NB-ARC|Disease resistance protein|P-loop containing nucleoside triphosphate hydrolase	GO:0043531|GO:0006952	NULL	NULL
Dr06659	GO:0009505|GO:0008152|GO:0016491	NULL	extensin-like protein	IPR001611	Leucine-rich repeat	GO:0005515	NULL	NULL
Dr06660	NULL	NULL	NULL	NULL	NULL	NULL	NULL	NULL
Dr06663	NULL	NULL	NULL	NULL	NULL	NULL	NULL	NULL
Dr06701	NULL	NULL	NULL	IPR000070|IPR006501|IPR011050|IPR012334	Pectinesterase, catalytic|Pectinesterase inhibitor domain|Pectin lyase fold/virulence factor|Pectin lyase fold	GO:0005618|GO:0030599|GO:0042545|GO:0004857	EC:3.1.1.11	KEGG: 00040+3.1.1.11|KEGG: 00500+3.1.1.11|MetaCyc: PWY-1081|MetaCyc: PWY-7243|MetaCyc: PWY-7246|MetaCyc: PWY-7248|UniPathway: UPA00545
Dr06706	NULL	NULL	NULL	IPR000070|IPR006501|IPR011050|IPR012334	Pectinesterase, catalytic|Pectinesterase inhibitor domain|Pectin lyase fold/virulence factor|Pectin lyase fold	GO:0005618|GO:0030599|GO:0042545|GO:0004857	EC:3.1.1.11	KEGG: 00040+3.1.1.11|KEGG: 00500+3.1.1.11|MetaCyc: PWY-1081|MetaCyc: PWY-7243|MetaCyc: PWY-7246|MetaCyc: PWY-7248|UniPathway: UPA00545
Dr06673	GO:0048868|GO:0010025|GO:0000038|GO:0042335|GO:0009416|GO:0009409|GO:0009922|GO:0009826|GO:0005783|GO:0009923|GO:0042967	NULL	3-ketoacyl- synthase	IPR013601|IPR013747|IPR016039|IPR016038|IPR012392	FAE1/Type III polyketide synthase-like protein|3-Oxoacyl-[acyl-carrier-protein (ACP)] synthase III C-terminal|Thiolase-like|Thiolase-like, subgroup|Very-long-chain 3-ketoacyl-CoA synthase	GO:0006633|GO:0016020|GO:0016747|GO:0008610|GO:0003824|GO:0008152	EC:2.3.1.199|EC:2.3.1.180	KEGG: 00062+2.3.1.199|MetaCyc: PWY-5080|MetaCyc: PWY-6433|MetaCyc: PWY-7036|UniPathway: UPA00094|KEGG: 00061+2.3.1.180|MetaCyc: PWY-4381|MetaCyc: PWY-6519|UniPathway: UPA00094
Dr06674	GO:0048868|GO:0010025|GO:0000038|GO:0042335|GO:0009416|GO:0009409|GO:0009922|GO:0009826|GO:0005783|GO:0009923|GO:0042967	NULL	3-ketoacyl- synthase	IPR013601|IPR013747|IPR016039|IPR016038|IPR012392	FAE1/Type III polyketide synthase-like protein|3-Oxoacyl-[acyl-carrier-protein (ACP)] synthase III C-terminal|Thiolase-like|Thiolase-like, subgroup|Very-long-chain 3-ketoacyl-CoA synthase	GO:0006633|GO:0016020|GO:0016747|GO:0008610|GO:0003824|GO:0008152	EC:2.3.1.199|EC:2.3.1.180	KEGG: 00062+2.3.1.199|MetaCyc: PWY-5080|MetaCyc: PWY-6433|MetaCyc: PWY-7036|UniPathway: UPA00094|KEGG: 00061+2.3.1.180|MetaCyc: PWY-4381|MetaCyc: PWY-6519|UniPathway: UPA00094
Dr06680	GO:0016491|GO:0009536	NULL	desacetoxyvindoline 4-	IPR026992|IPR027443	Non-haem dioxygenase N-terminal domain|Isopenicillin N synthase-like	NULL	NULL	NULL
Dr06684	GO:0016491|GO:0009536	NULL	desacetoxyvindoline 4-	IPR005123|IPR026992|IPR027443	Oxoglutarate/iron-dependent dioxygenase|Non-haem dioxygenase N-terminal domain|Isopenicillin N synthase-like	GO:0016491|GO:0016706|GO:0055114	NULL	NULL
Dr06686	NULL	NULL	NULL	NULL	NULL	NULL	NULL	NULL
Dr06707	GO:0016788|GO:0008152	NULL	pectinesterase	IPR000070|IPR011050|IPR012334|IPR018040	Pectinesterase, catalytic|Pectin lyase fold/virulence factor|Pectin lyase fold|Pectinesterase, active site	GO:0005618|GO:0030599|GO:0042545	EC:3.1.1.11	KEGG: 00040+3.1.1.11|KEGG: 00500+3.1.1.11|MetaCyc: PWY-1081|MetaCyc: PWY-7243|MetaCyc: PWY-7246|MetaCyc: PWY-7248|UniPathway: UPA00545
Dr06713	NULL	NULL	NULL	IPR007656	Zein-binding domain	NULL	NULL	NULL
Dr06774	GO:0003824	NULL	aldo-keto	IPR001395|IPR023210|IPR020471|IPR018170	Aldo/keto reductase|NADP-dependent oxidoreductase domain|Aldo/keto reductase subgroup|Aldo/keto reductase, conserved site	GO:0016491|GO:0055114	NULL	NULL
Dr06753	NULL	NULL	NULL	NULL	NULL	NULL	NULL	NULL
Dr06778	GO:0015079|GO:0071805|GO:0016021	NULL	probable potassium transporter 17-like	IPR003855	K+ potassium transporter	GO:0015079|GO:0016020|GO:0071805	NULL	NULL
Dr21014	GO:0009987|GO:0004672|GO:0000166	NULL	enhanced disease resistance 1	NULL	NULL	NULL	NULL	NULL
Dr21018	GO:0050896|GO:0006468|GO:0004672	NULL	map3k delta-1 protein	NULL	NULL	NULL	NULL	NULL
Dr25946	NULL	NULL	NULL	IPR004252	Probable transposase, Ptta/En/Spm, plant	NULL	NULL	NULL
Dr21023	GO:0016310|GO:0004674|GO:0000166|GO:0009069	EC:2.7.11.0	l-type lectin-domain containing receptor kinase -like	IPR000719|IPR011009|IPR013320|IPR002290|IPR017441|IPR008271	Protein kinase domain|Protein kinase-like domain|Concanavalin A-like lectin/glucanase, subgroup|Serine/threonine- / dual specificity protein kinase, catalytic domain|Protein kinase, ATP binding site|Serine/threonine-protein kinase, active site	GO:0004672|GO:0005524|GO:0006468|GO:0016772|GO:0004674	NULL	NULL
Dr21024	GO:0016787	NULL	protein	IPR013128|IPR000668	Peptidase C1A, papain|Peptidase C1A, papain C-terminal	GO:0008234|GO:0006508	NULL	NULL
Dr21028	NULL	NULL	NULL	NULL	NULL	NULL	NULL	NULL
Dr21032	NULL	NULL	NULL	IPR006045|IPR011051|IPR014710	Cupin 1|RmlC-like cupin domain|RmlC-like jelly roll fold	GO:0045735	NULL	NULL
Dr21039	NULL	NULL	NULL	IPR000308|IPR023410	14-3-3 protein|14-3-3 domain	GO:0019904	NULL	NULL
Dr21040	NULL	NULL	NULL	IPR001471|IPR016177	AP2/ERF domain|DNA-binding domain	GO:0003700|GO:0006355|GO:0003677	NULL	NULL
Dr21084	NULL	NULL	NULL	IPR001611|IPR002182|IPR027417|IPR000767	Leucine-rich repeat|NB-ARC|Disease resistance protein|P-loop containing nucleoside triphosphate hydrolase	GO:0005515|GO:0043531|GO:0006952	NULL	NULL
Dr21085	NULL	NULL	NULL	NULL	NULL	NULL	NULL	NULL
Dr21086	NULL	NULL	NULL	NULL	NULL	NULL	NULL	NULL
Dr21125	GO:0016020|GO:0010035|GO:0006810|GO:0005215	NULL	protein	IPR000109|IPR016196	Proton-dependent oligopeptide transporter family|Major facilitator superfamily domain, general substrate transporter	GO:0005215|GO:0006810|GO:0016020	NULL	Reactome: REACT_15518|Reactome: REACT_19419
Dr21130	NULL	NULL	NULL	NULL	NULL	NULL	NULL	NULL
Dr21137	GO:0016023	NULL	af385728_1at3g47831 t23j7	NULL	NULL	NULL	NULL	NULL
Dr21144	GO:0010541|GO:0000166|GO:0016021|GO:0010329|GO:0010540|GO:0010315|GO:0042626|GO:0055085|GO:0005886	NULL	multidrug resistance protein	IPR003439|IPR001140|IPR027417|IPR011527|IPR003593|IPR017871	ABC transporter-like|ABC transporter, transmembrane domain|P-loop containing nucleoside triphosphate hydrolase|ABC transporter type 1, transmembrane domain|AAA+ ATPase domain|ABC transporter, conserved site	GO:0005524|GO:0016887|GO:0006810|GO:0016021|GO:0042626|GO:0055085|GO:0000166|GO:0017111	NULL	NULL
Dr25961	NULL	NULL	NULL	NULL	NULL	NULL	NULL	NULL
Dr06824	NULL	NULL	NULL	NULL	NULL	NULL	NULL	NULL
Dr06809	NULL	NULL	NULL	NULL	NULL	NULL	NULL	NULL
Dr06811	NULL	NULL	NULL	NULL	NULL	NULL	NULL	NULL
Dr06844	NULL	NULL	NULL	NULL	NULL	NULL	NULL	NULL
Dr06845	NULL	NULL	NULL	NULL	NULL	NULL	NULL	NULL
Dr06858	GO:0005488|GO:0044446|GO:0005694|GO:0005634	NULL	histone h2a	IPR007125|IPR009072|IPR002119	Histone core|Histone H2A|Histone-fold	GO:0003677|GO:0046982|GO:0000786|GO:0005634|GO:0006334	NULL	NULL
Dr06841	NULL	NULL	NULL	NULL	NULL	NULL	NULL	NULL
Dr06842	GO:0003677|GO:0004601|GO:0006310|GO:0006804|GO:0006979	EC:1.11.1.7	retrotransposon unclassified	NULL	NULL	NULL	NULL	NULL
Dr06853	GO:1901576|GO:0044710|GO:0044237	NULL	protein wax2-like	NULL	NULL	NULL	NULL	NULL
Dr06887	NULL	NULL	NULL	NULL	NULL	NULL	NULL	NULL
Dr06889	GO:0016787|GO:1901363|GO:0097159	NULL	cell division protein	IPR025558|IPR013083|IPR002885	Domain of unknown function DUF4283|Zinc finger, RING/FYVE/PHD-type|Pentatricopeptide repeat	NULL	NULL	NULL
Dr00203	NULL	NULL	NULL	NULL	NULL	NULL	NULL	NULL
Dr00196	GO:0044464|GO:0016757	NULL	transferring glycosyl	NULL	NULL	NULL	NULL	NULL
Dr00221	NULL	NULL	NULL	NULL	NULL	NULL	NULL	NULL
Dr00224	GO:0016020	NULL	neutral amino acid transport protein	IPR002293	Amino acid/polyamine transporter I	GO:0003333|GO:0015171|GO:0016020	NULL	NULL
Dr00210	NULL	NULL	NULL	NULL	NULL	NULL	NULL	NULL
Dr00211	NULL	NULL	NULL	NULL	NULL	NULL	NULL	NULL
Dr00223	NULL	NULL	NULL	NULL	NULL	NULL	NULL	NULL
Dr00237	GO:0016788|GO:0016023	NULL	anther-specific proline-rich protein apg precursor	IPR001087|IPR013831	Lipase, GDSL|SGNH hydrolase-type esterase domain	GO:0006629|GO:0016788|GO:0016787	NULL	NULL
Dr00246	NULL	NULL	NULL	IPR000095	CRIB domain	NULL	NULL	NULL
Dr00250	NULL	NULL	NULL	NULL	NULL	NULL	NULL	NULL
Dr00215	NULL	NULL	NULL	NULL	NULL	NULL	NULL	NULL
Dr00277	NULL	NULL	NULL	IPR010903	Protein of unknown function DUF1517	NULL	NULL	NULL
Dr00254	NULL	NULL	NULL	IPR004873	BURP domain	NULL	NULL	NULL
Dr00255	NULL	NULL	NULL	IPR004873	BURP domain	NULL	NULL	NULL
Dr00261	NULL	NULL	NULL	IPR006456|IPR009057	ZF-HD homeobox protein, Cys/His-rich dimerisation domain|Homeodomain-like	GO:0003677	NULL	NULL
Dr21195	NULL	NULL	NULL	NULL	NULL	NULL	NULL	NULL
Dr21197	NULL	NULL	NULL	NULL	NULL	NULL	NULL	NULL
Dr21236	GO:0044763|GO:0004672|GO:0050896|GO:0008152	NULL	receptor kinase-like protein	IPR001611|IPR001245|IPR026960|IPR011009|IPR013320|IPR000719|IPR017441	Leucine-rich repeat|Serine-threonine/tyrosine-protein kinase catalytic domain|Reverse transcriptase zinc-binding domain|Protein kinase-like domain|Concanavalin A-like lectin/glucanase, subgroup|Protein kinase domain|Protein kinase, ATP binding site	GO:0005515|GO:0004672|GO:0006468|GO:0016772|GO:0005524	NULL	NULL
Dr21237	GO:0016023|GO:0016045|GO:0032440|GO:0042742|GO:0016021|GO:0009507|GO:0002764|GO:0006468|GO:0010359|GO:0004674|GO:0016567|GO:0010204|GO:0009626|GO:0055114|GO:0005886|GO:0005524|GO:0032940|GO:0009069	EC:1.3.1.74|EC:2.7.11.0	serine-threonine protein plant-	IPR000719|IPR011009|IPR002290|IPR008271	Protein kinase domain|Protein kinase-like domain|Serine/threonine- / dual specificity protein kinase, catalytic domain|Serine/threonine-protein kinase, active site	GO:0004672|GO:0005524|GO:0006468|GO:0016772|GO:0004674	NULL	NULL
Dr21230	GO:0016491|GO:0000166|GO:0055114	NULL	tropinone reductase homolog at1g07440-like	IPR002198|IPR016040|IPR002347	Short-chain dehydrogenase/reductase SDR|Glucose/ribitol dehydrogenase|NAD(P)-binding domain	GO:0008152|GO:0016491	NULL	NULL
Dr21227	GO:0044424	NULL	nad-dependent epimerase dehydratase	IPR016040	NAD(P)-binding domain	NULL	NULL	NULL
Dr21258	NULL	NULL	NULL	NULL	NULL	NULL	NULL	NULL
Dr21260	NULL	NULL	NULL	NULL	NULL	NULL	NULL	NULL
Dr21281	GO:0003746|GO:0046872|GO:0006355|GO:0005634|GO:0005840|GO:0006448	NULL	transcription elongation factor 1	IPR007808	Transcription elongation factor 1	NULL	NULL	NULL
Dr21282	GO:0043231|GO:0043232	NULL	histone h2b	IPR000558|IPR007125|IPR009072	Histone H2B|Histone core|Histone-fold	GO:0000786|GO:0003677|GO:0005634|GO:0006334|GO:0046982	NULL	NULL
Dr21283	GO:0044267|GO:0000166	NULL	tcp-1 cpn60 chaperonin family protein	IPR002423|IPR012721|IPR027409|IPR027413|IPR027410|IPR017998|IPR002194	Chaperonin Cpn60/TCP-1|T-complex protein 1, theta subunit|Chaperone tailless complex polypeptide 1 (TCP-1)|GroEL-like apical domain|GroEL-like equatorial domain|TCP-1-like chaperonin intermediate domain|Chaperonin TCP-1, conserved site	GO:0005524|GO:0044267|GO:0006457|GO:0051082	NULL	Reactome: REACT_17015
Dr21286	GO:0008168	EC:2.1.1.0	orcinol o-methyltransferase	IPR001077	O-methyltransferase, family 2	GO:0008171	NULL	NULL
Dr21296	GO:0005488|GO:0044238|GO:0043414	NULL	histone-lysine n- h3 lysine-9 specific suvh4-like	IPR001214|IPR007728|IPR003606	SET domain|Pre-SET domain|Pre-SET zinc-binding sub-group	GO:0005515|GO:0005634|GO:0008270|GO:0018024|GO:0034968	EC:2.1.1.43	KEGG: 00310+2.1.1.43
Dr21324	NULL	NULL	NULL	NULL	NULL	NULL	NULL	NULL
Dr21325	NULL	NULL	NULL	NULL	NULL	NULL	NULL	NULL
Dr21304	GO:0016798|GO:0016023	NULL	glucan endo- -beta-glucosidase 8	IPR000490|IPR012946|IPR017853|IPR013781	Glycoside hydrolase, family 17|X8|Glycoside hydrolase, superfamily|Glycoside hydrolase, catalytic domain	GO:0004553|GO:0005975|GO:0003824	EC:3.2.1.39	KEGG: 00500+3.2.1.39
Dr21307	NULL	NULL	NULL	NULL	NULL	NULL	NULL	NULL
Dr21318	NULL	NULL	NULL	NULL	NULL	NULL	NULL	NULL
Dr21311	GO:0055085|GO:0043231|GO:0044444|GO:0016020	NULL	ca2+ antiporter cation exchanger	IPR004837	Sodium/calcium exchanger membrane region	GO:0016021|GO:0055085	NULL	Reactome: REACT_15518
Dr06949	GO:0035251	NULL	anthocyanidin 3-o-glucosyltransferase	IPR002213	UDP-glucuronosyl/UDP-glucosyltransferase	GO:0008152|GO:0016758	NULL	NULL
Dr06950	GO:0050275|GO:0042802|GO:0009805|GO:0009809|GO:0009811	EC:2.4.1.128	protein	IPR002213	UDP-glucuronosyl/UDP-glucosyltransferase	GO:0008152|GO:0016758	NULL	NULL
Dr06951	GO:0006468|GO:0005524|GO:0004674|GO:0009536|GO:0009069	EC:2.7.11.0	proline-rich receptor-like protein kinase perk12-like	IPR000719|IPR001245|IPR011009|IPR013320|IPR017441	Protein kinase domain|Serine-threonine/tyrosine-protein kinase catalytic domain|Protein kinase-like domain|Concanavalin A-like lectin/glucanase, subgroup|Protein kinase, ATP binding site	GO:0004672|GO:0005524|GO:0006468|GO:0016772	NULL	NULL
Dr06915	NULL	NULL	NULL	NULL	NULL	NULL	NULL	NULL
Dr06916	GO:0016023|GO:0006468|GO:0005524|GO:0032440|GO:0016021|GO:0004674|GO:0055114|GO:0009069	EC:1.3.1.74|EC:2.7.11.0	receptor protein	NULL	NULL	NULL	NULL	NULL
Dr06935	GO:0044464	NULL	sec14 cytosolic factor	IPR001251|IPR003729|IPR011074	CRAL-TRIO domain|Bifunctional nuclease domain|CRAL/TRIO, N-terminal domain	GO:0004518	NULL	NULL
Dr06978	GO:0016210|GO:0009813	EC:2.3.1.74	chalcone synthase	IPR001099|IPR012328|IPR016039|IPR016038|IPR018088	Chalcone/stilbene synthase, N-terminal|Chalcone/stilbene synthase, C-terminal|Thiolase-like|Thiolase-like, subgroup|Chalcone/stilbene synthase, active site	GO:0009058|GO:0016746|GO:0003824|GO:0008152	EC:2.3.1.74	KEGG: 00941+2.3.1.74|MetaCyc: PWY-5135|MetaCyc: PWY-6316|MetaCyc: PWY-6787|UniPathway: UPA00154
Dr07000	NULL	NULL	NULL	IPR000008	C2 domain	GO:0005515	NULL	NULL
Dr06959	NULL	NULL	NULL	NULL	NULL	NULL	NULL	NULL
Dr07064	NULL	NULL	NULL	NULL	NULL	NULL	NULL	NULL
Dr07087	GO:0006952|GO:0016567|GO:0004842|GO:1901700|GO:0000151	EC:6.3.2.19	e3 ubiquitin-protein ligase pub23-like	NULL	NULL	NULL	NULL	NULL
Dr07028	GO:0008270	NULL	ring finger and chy zinc finger domain-containing protein 1	IPR008913|IPR001841|IPR013083|IPR017921	Zinc finger, CHY-type|Zinc finger, RING-type|Zinc finger, RING/FYVE/PHD-type|Zinc finger, CTCHY-type	GO:0008270|GO:0005515	NULL	NULL
Dr07062	GO:0044464	NULL	extensin-like protein	NULL	NULL	NULL	NULL	NULL
Dr21340	NULL	NULL	NULL	NULL	NULL	NULL	NULL	NULL
Dr21448	GO:0005829|GO:0019388|GO:0009409|GO:0009941|GO:0019252|GO:0000287|GO:0009570|GO:0005992|GO:0004614|GO:0009590|GO:0005978|GO:0010319|GO:0048046|GO:0005985|GO:0006094|GO:0006096|GO:0006098|GO:0019872	EC:5.4.2.2	phosphoglucomutase	IPR005844|IPR016055	Alpha-D-phosphohexomutase, alpha/beta/alpha domain I|Alpha-D-phosphohexomutase, alpha/beta/alpha I/II/III	GO:0005975|GO:0016868	EC:5.4.2.10	KEGG: 00520+5.4.2.10|MetaCyc: PWY-6749
Dr26010	GO:0016020|GO:0016023|GO:0017119|GO:0005509	NULL	vacuolar-sorting receptor 7-like	NULL	NULL	NULL	NULL	NULL
Dr21500	GO:0007275|GO:0000166|GO:0004672|GO:0016310|GO:0050896|GO:0050789|GO:0005739	NULL	map kinase kinase	IPR000719|IPR011009|IPR002290|IPR017441|IPR008271	Protein kinase domain|Protein kinase-like domain|Serine/threonine- / dual specificity protein kinase, catalytic domain|Protein kinase, ATP binding site|Serine/threonine-protein kinase, active site	GO:0004672|GO:0005524|GO:0006468|GO:0016772|GO:0004674	NULL	NULL
Dr07104	NULL	NULL	NULL	NULL	NULL	NULL	NULL	NULL
Dr07105	NULL	NULL	NULL	NULL	NULL	NULL	NULL	NULL
Dr07107	GO:0003824	NULL	acetyl-coenzyme a carboxylase carboxyl transferase subunit alpha	IPR001095	Acetyl-CoA carboxylase, alpha subunit	GO:0003989|GO:0006633|GO:0009317	EC:6.4.1.2	KEGG: 00061+6.4.1.2|KEGG: 00253+6.4.1.2|KEGG: 00620+6.4.1.2|KEGG: 00640+6.4.1.2|KEGG: 00720+6.4.1.2|MetaCyc: PWY-4381|MetaCyc: PWY-5743|MetaCyc: PWY-5744|MetaCyc: PWY-5789|MetaCyc: PWY-6679|UniPathway: UPA00655
Dr07108	NULL	NULL	NULL	NULL	NULL	NULL	NULL	NULL
Dr26015	NULL	NULL	NULL	NULL	NULL	NULL	NULL	NULL
Dr21537	NULL	NULL	NULL	NULL	NULL	NULL	NULL	NULL
Dr21581	GO:0000166|GO:0004812|GO:0006418	NULL	seryl-trna synthetase	IPR002317|IPR002314|IPR015866|IPR010978|IPR006195	Serine-tRNA ligase, type1|Aminoacyl-tRNA synthetase, class II (G/ H/ P/ S), conserved domain|Serine-tRNA synthetase, type1, N-terminal|tRNA-binding arm|Aminoacyl-tRNA synthetase, class II	GO:0000166|GO:0004828|GO:0005524|GO:0005737|GO:0006434|GO:0004812|GO:0006418	EC:6.1.1.11	KEGG: 00970+6.1.1.11|MetaCyc: PWY-6281|Reactome: REACT_71|UniPathway: UPA00906|Reactome: REACT_71|KEGG: 00970+6.1.1.11|MetaCyc: PWY-6281|UniPathway: UPA00906
Dr21638	NULL	NULL	NULL	IPR001360|IPR017853|IPR013781|IPR018120	Glycoside hydrolase, family 1|Glycoside hydrolase, superfamily|Glycoside hydrolase, catalytic domain|Glycoside hydrolase, family 1, active site	GO:0004553|GO:0005975|GO:0003824	NULL	NULL
Dr07114	NULL	NULL	NULL	NULL	NULL	NULL	NULL	NULL
Dr07115	NULL	NULL	NULL	NULL	NULL	NULL	NULL	NULL
Dr07118	NULL	NULL	NULL	NULL	NULL	NULL	NULL	NULL
Dr07126	NULL	NULL	NULL	IPR006011|IPR010989	Syntaxin, N-terminal domain|t-SNARE	GO:0016020|GO:0016192	NULL	Reactome: REACT_11184
Dr07211	GO:0016491|GO:0044710|GO:0009536	NULL	4-coumarate-coa ligase	IPR000873|IPR025110	AMP-dependent synthetase/ligase|AMP-binding enzyme C-terminal domain	GO:0003824|GO:0008152	NULL	NULL
Dr07214	GO:0016772	NULL	g-type lectin s-receptor-like serine threonine-protein kinase rlk1-like	IPR000858|IPR001480|IPR001245|IPR011009|IPR013320|IPR000719|IPR017441	S-locus glycoprotein|Bulb-type lectin domain|Serine-threonine/tyrosine-protein kinase catalytic domain|Protein kinase-like domain|Concanavalin A-like lectin/glucanase, subgroup|Protein kinase domain|Protein kinase, ATP binding site	GO:0048544|GO:0004672|GO:0006468|GO:0016772|GO:0005524	NULL	NULL
Dr07261	NULL	NULL	NULL	IPR006041|IPR007608	Pollen Ole e 1 allergen/extensin|Senescence regulator S40	NULL	NULL	NULL
Dr07154	NULL	NULL	NULL	NULL	NULL	NULL	NULL	NULL
Dr07178	GO:0060918|GO:0048364|GO:0016021|GO:0022857|GO:0009733	NULL	auxin influx carrier protein	IPR013057	Amino acid transporter, transmembrane	NULL	NULL	NULL
Dr07201	NULL	NULL	NULL	NULL	NULL	NULL	NULL	NULL
Dr07147	NULL	NULL	NULL	NULL	NULL	NULL	NULL	NULL
Dr07153	GO:0016491|GO:0008152|GO:0009536	NULL	polyphenol oxidase	IPR002227|IPR022739|IPR008922	Tyrosinase|Polyphenol oxidase, central domain|Uncharacterised domain, di-copper centre	GO:0008152|GO:0016491|GO:0004097|GO:0055114	EC:1.10.3.1	KEGG: 00350+1.10.3.1|KEGG: 00950+1.10.3.1|MetaCyc: PWY-5349|MetaCyc: PWY-6752
Dr07162	GO:0010474|GO:0009753|GO:0010193|GO:0010471|GO:0010475|GO:0042742|GO:0080048|GO:0009408|GO:0008928|GO:0052544|GO:0010473|GO:0010472|GO:0019853|GO:0080046|GO:0006000|GO:0006013	EC:2.7.7.22	gdp-l-galactose phosphorylase	NULL	NULL	NULL	NULL	NULL
Dr21718	NULL	NULL	NULL	NULL	NULL	NULL	NULL	NULL
Dr21739	NULL	NULL	NULL	NULL	NULL	NULL	NULL	NULL
Dr21732	GO:0046961|GO:0046933|GO:0015991|GO:0045261|GO:0015986|GO:0005524|GO:0005739|GO:0006119	NULL	f1-atpase alpha subunit	IPR000194|IPR000793|IPR004100|IPR027417|IPR023366	ATPase, F1/V1/A1 complex, alpha/beta subunit, nucleotide-binding domain|ATPase, F1/V1/A1 complex, alpha/beta subunit, C-terminal|ATPase, F1 complex alpha/beta subunit, N-terminal domain|P-loop containing nucleoside triphosphate hydrolase|ATP synthase subunit alpha-like domain	GO:0005524|GO:0015991|GO:0016820|GO:0033178|GO:0015992|GO:0046034	EC:3.6.3.14	KEGG: 00190+3.6.3.14|KEGG: 00195+3.6.3.14|MetaCyc: PWY-7219
Dr21733	GO:0005743|GO:0008137|GO:0016021|GO:0006120|GO:0006744|GO:0006814|GO:0015992	EC:1.6.5.3	nadh dehydrogenase subunit 5	IPR001750	NADH:ubiquinone/plastoquinone oxidoreductase	GO:0008137|GO:0055114	NULL	Reactome: REACT_6305
Dr21734	NULL	NULL	NULL	NULL	NULL	NULL	NULL	NULL
Dr26040	GO:0016787	NULL	protein	IPR001223|IPR017853|IPR013781|IPR011583|IPR001579	Glycoside hydrolase, family 18, catalytic domain|Glycoside hydrolase, superfamily|Glycoside hydrolase, catalytic domain|Chitinase II|Glycoside hydrolase, chitinase active site	GO:0004553|GO:0005975|GO:0003824|GO:0004568|GO:0006032	EC:3.2.1.14	KEGG: 00520+3.2.1.14|MetaCyc: PWY-6902
Dr26042	GO:0016788|GO:0009536	NULL	d-aminoacyl-trna deacylase	NULL	NULL	NULL	NULL	NULL
Dr21838	NULL	NULL	NULL	NULL	NULL	NULL	NULL	NULL
Dr21851	GO:0016746	NULL	uncharacterized acetyltransferase at3g50280-like	IPR003480|IPR023213	Transferase|Chloramphenicol acetyltransferase-like domain	GO:0016747	NULL	NULL
Dr21858	NULL	NULL	NULL	NULL	NULL	NULL	NULL	NULL
Dr07263	NULL	NULL	NULL	NULL	NULL	NULL	NULL	NULL
Dr07266	NULL	NULL	NULL	NULL	NULL	NULL	NULL	NULL
Dr07318	NULL	NULL	NULL	IPR002902	Gnk2-homologous domain	NULL	NULL	NULL
Dr07324	GO:0008810|GO:0030245|GO:0016023|GO:0042547|GO:0005576|GO:0009507|GO:0005982|GO:0005985	EC:3.2.1.4	endo- -beta-glucanase precursor	IPR001701|IPR008928|IPR012341	Glycoside hydrolase, family 9|Six-hairpin glycosidase-like|Six-hairpin glycosidase	GO:0004553|GO:0005975|GO:0003824	EC:3.2.1.4	KEGG: 00500+3.2.1.4|MetaCyc: PWY-6788|MetaCyc: PWY-6805
Dr07381	GO:0003700|GO:0000976|GO:0006355|GO:0005667|GO:0045449	NULL	homeobox domain containing expressed	IPR001356|IPR009057|IPR000047|IPR017970	Homeobox domain|Helix-turn-helix motif|Homeodomain-like|Homeobox, conserved site	GO:0003700|GO:0006355|GO:0043565|GO:0003677|GO:0000976|GO:0005634	NULL	NULL
Dr07291	GO:0047036|GO:0005737|GO:0016746|GO:0009821	EC:1.1.1.247	aldo keto reductase	IPR001395|IPR023210|IPR020471|IPR018170	Aldo/keto reductase|NADP-dependent oxidoreductase domain|Aldo/keto reductase subgroup|Aldo/keto reductase, conserved site	GO:0016491|GO:0055114	NULL	NULL
Dr07300	GO:0044424	NULL	u-box domain-containing protein	IPR016024|IPR011989	Armadillo-type fold|Armadillo-like helical	GO:0005488	NULL	NULL
Dr07303	GO:0009753|GO:0034765|GO:0009414|GO:0009409|GO:0071805|GO:0009737|GO:0015271|GO:0005634|GO:0008076	NULL	potassium channel skor	IPR000595|IPR000719|IPR005821|IPR021789|IPR020683|IPR018490|IPR011009|IPR014710|IPR002290|IPR002110|IPR017441|IPR008271	Cyclic nucleotide-binding domain|Protein kinase domain|Ion transport domain|Potassium channel, plant-type|Ankyrin repeat-containing domain|Cyclic nucleotide-binding-like|Protein kinase-like domain|RmlC-like jelly roll fold|Serine/threonine- / dual specificity protein kinase, catalytic domain|Ankyrin repeat|Protein kinase, ATP binding site|Serine/threonine-protein kinase, active site	GO:0004672|GO:0005524|GO:0006468|GO:0005216|GO:0006811|GO:0016020|GO:0055085|GO:0016772|GO:0005515|GO:0004674	NULL	NULL
Dr07376	NULL	NULL	NULL	IPR001841|IPR013083	Zinc finger, RING-type|Zinc finger, RING/FYVE/PHD-type	GO:0005515|GO:0008270	NULL	NULL
Dr26052	NULL	NULL	NULL	IPR001394	Ubiquitin carboxyl-terminal hydrolases family 2	GO:0004221|GO:0006511	NULL	NULL
Dr21874	NULL	NULL	NULL	NULL	NULL	NULL	NULL	NULL
Dr21882	NULL	NULL	NULL	NULL	NULL	NULL	NULL	NULL
Dr21875	GO:0005743|GO:0070469|GO:0008137|GO:0016021|GO:0006120|GO:0006744|GO:0006814|GO:0015992	EC:1.6.5.3	nadh-ubiquinone oxidoreductase chain	IPR001694	NADH:ubiquinone oxidoreductase, subunit 1/F420H2 oxidoreductase subunit H	GO:0016020|GO:0055114	NULL	NULL
Dr21888	GO:0032550|GO:0007275|GO:0004672|GO:0050896|GO:0006468|GO:0032559|GO:0043168|GO:0050789|GO:0005739	NULL	map kinase kinase	IPR000719|IPR011009|IPR002290|IPR008271	Protein kinase domain|Protein kinase-like domain|Serine/threonine- / dual specificity protein kinase, catalytic domain|Serine/threonine-protein kinase, active site	GO:0004672|GO:0005524|GO:0006468|GO:0016772|GO:0004674	NULL	NULL
Dr21890	GO:0000166|GO:0004672|GO:0009791|GO:2000026|GO:0006468|GO:0048856|GO:0000165|GO:0005739	NULL	map kinase kinase	IPR000719|IPR011009|IPR002290|IPR017441|IPR008271	Protein kinase domain|Protein kinase-like domain|Serine/threonine- / dual specificity protein kinase, catalytic domain|Protein kinase, ATP binding site|Serine/threonine-protein kinase, active site	GO:0004672|GO:0005524|GO:0006468|GO:0016772|GO:0004674	NULL	NULL
Dr21944	GO:0005488|GO:0016020	NULL	chlororespiratory reduction 4	IPR002885	Pentatricopeptide repeat	NULL	NULL	NULL
Dr21954	GO:0008270	NULL	ring-h2 finger protein	IPR001841|IPR013083	Zinc finger, RING-type|Zinc finger, RING/FYVE/PHD-type	GO:0005515|GO:0008270	NULL	NULL
Dr07382	GO:0043167|GO:0044237|GO:0046912|GO:0044238|GO:0005739	EC:2.3.3.0	citrate synthase 4	IPR002020|IPR016141|IPR016142	Citrate synthase-like|Citrate synthase-like, core|Citrate synthase-like, large alpha subdomain	GO:0044262|GO:0046912	EC:2.3.3.1	KEGG: 00020+2.3.3.1|KEGG: 00630+2.3.3.1|MetaCyc: PWY-5690|MetaCyc: PWY-5750|MetaCyc: PWY-5913|MetaCyc: PWY-6549|MetaCyc: PWY-6728|MetaCyc: PWY-6969|MetaCyc: PWY-7124|MetaCyc: PWY-7254|UniPathway: UPA00223
Dr07443	GO:0006505|GO:0016788|GO:0016023|GO:0005886|GO:0006886|GO:0031227	NULL	gpi inositol-deacylase	IPR012908	GPI inositol-deacylase PGAP1-like	GO:0006505|GO:0006886|GO:0016788	NULL	NULL
Dr07433	GO:0016787	NULL	subtilisin-like protease	IPR015500|IPR000209|IPR003137|IPR010259|IPR009020|IPR023828	Peptidase S8, subtilisin-related|Peptidase S8/S53 domain|Protease-associated domain, PA|Proteinase inhibitor I9|Proteinase inhibitor, propeptide|Peptidase S8, subtilisin, Ser-active site	GO:0004252|GO:0006508|GO:0042802|GO:0043086	NULL	NULL
Dr07506	GO:0045271|GO:0048038|GO:0008137|GO:0051539|GO:0008270|GO:0005739|GO:0006120|GO:0006744|GO:0006814|GO:0015992	EC:1.6.5.3	nadh dehydrogenase	NULL	NULL	NULL	NULL	NULL
Dr07550	GO:0044424	NULL	peroxidase n	IPR002016|IPR010255|IPR000823	Haem peroxidase, plant/fungal/bacterial|Plant peroxidase|Haem peroxidase	GO:0004601|GO:0006979|GO:0020037|GO:0055114	EC:1.11.1.7	KEGG: 00360+1.11.1.7|KEGG: 00940+1.11.1.7|MetaCyc: PWY-5461|MetaCyc: PWY-7214
Dr07565	NULL	NULL	NULL	NULL	NULL	NULL	NULL	NULL
Dr07481	GO:0016020|GO:0009536	NULL	prenyl-dependent caax	IPR003675	CAAX amino terminal protease	GO:0016020	NULL	NULL
Dr07512	GO:0071704|GO:0009536|GO:0016868|GO:0016310|GO:0044238|GO:0010053	EC:5.4.2.0	type i inositol- -trisphosphate 5-phosphatase cvp2-like	IPR015429|IPR006671|IPR013078|IPR005135|IPR013763|IPR000300|IPR001345|IPR005952	Cyclin C/H/T/L|Cyclin, N-terminal|Histidine phosphatase superfamily, clade-1|Endonuclease/exonuclease/phosphatase|Cyclin-like|Inositol polyphosphate-related phosphatase|Phosphoglycerate/bisphosphoglycerate mutase, active site|Phosphoglycerate mutase 1	GO:0000079|GO:0006355|GO:0019901|GO:0046856|GO:0003824|GO:0008152|GO:0004619|GO:0006096|GO:0016868	NULL	UniPathway: UPA00109
Dr07529	GO:0016758	EC:2.4.1.0	udp-glycosyltransferase 85a2 isoform 1	IPR002213|IPR001932	UDP-glucuronosyl/UDP-glucosyltransferase|Protein phosphatase 2C (PP2C)-like domain	GO:0008152|GO:0016758|GO:0003824	NULL	NULL
Dr22004	NULL	NULL	NULL	IPR013831	SGNH hydrolase-type esterase domain	GO:0016787	NULL	NULL
Dr22015	GO:0010053|GO:0016021|GO:0009932|GO:0016817|GO:0030036|GO:0006888|GO:0009832|GO:0005783|GO:0005525|GO:0005886	NULL	protein root hair defective 3 homolog 1-like	NULL	NULL	NULL	NULL	NULL
Dr22022	NULL	NULL	NULL	NULL	NULL	NULL	NULL	NULL
Dr22028	NULL	NULL	NULL	NULL	NULL	NULL	NULL	NULL
Dr22023	NULL	NULL	NULL	IPR001611	Leucine-rich repeat	GO:0005515	NULL	NULL
Dr22024	NULL	NULL	NULL	NULL	NULL	NULL	NULL	NULL
Dr22054	GO:0022900|GO:0005488|GO:0004497|GO:0016023	NULL	cytochrome p450	IPR001128	Cytochrome P450	GO:0005506|GO:0016705|GO:0020037|GO:0055114	NULL	Reactome: REACT_13433
Dr22055	GO:0046872|GO:0016491|GO:0044710	NULL	secologanin synthase-like	IPR001128|IPR002402	Cytochrome P450|Cytochrome P450, E-class, group II	GO:0005506|GO:0016705|GO:0020037|GO:0055114|GO:0004497	NULL	Reactome: REACT_13433
Dr22057	GO:0022900|GO:0046872|GO:0004497|GO:0016023	NULL	cytochrome p450	IPR001128|IPR002401|IPR017972	Cytochrome P450|Cytochrome P450, E-class, group I|Cytochrome P450, conserved site	GO:0005506|GO:0016705|GO:0020037|GO:0055114	NULL	Reactome: REACT_13433
Dr22041	GO:0046872|GO:0006979|GO:0016023|GO:0020037|GO:0016787|GO:0004601|GO:0055114|GO:0006804	EC:1.11.1.7	peroxidase 19	IPR002016|IPR001087|IPR010255|IPR013831|IPR000823|IPR019793|IPR019794	Haem peroxidase, plant/fungal/bacterial|Lipase, GDSL|Plant peroxidase|Haem peroxidase|SGNH hydrolase-type esterase domain|Peroxidases heam-ligand binding site|Peroxidase, active site	GO:0004601|GO:0006979|GO:0020037|GO:0055114|GO:0006629|GO:0016788|GO:0016787	EC:1.11.1.7	KEGG: 00360+1.11.1.7|KEGG: 00940+1.11.1.7|MetaCyc: PWY-5461|MetaCyc: PWY-7214
Dr22079	NULL	NULL	NULL	NULL	NULL	NULL	NULL	NULL
Dr07624	GO:0008508|GO:0009507|GO:0016020|GO:0006814|GO:0015721	NULL	uncharacterized sodium-dependent transporter yocs-like	IPR002657	Bile acid:sodium symporter	GO:0006814|GO:0008508|GO:0016020	NULL	NULL
Dr07604	GO:0005737|GO:0003723|GO:0006412	NULL	initiation factor 3g	NULL	NULL	NULL	NULL	NULL
Dr07618	GO:0043167|GO:0016706|GO:0005739	EC:1.14.11.0	prolyl 4-hydroxylase subunit alpha-1	NULL	NULL	NULL	NULL	NULL
Dr07605	GO:0016772	NULL	phosphoenolpyruvate carboxylase kinase	IPR000719|IPR011009	Protein kinase domain|Protein kinase-like domain	GO:0004672|GO:0005524|GO:0006468|GO:0016772	NULL	NULL
Dr07632	GO:0044710	NULL	polyphenol oxidase	IPR002227|IPR022739|IPR008922	Tyrosinase|Polyphenol oxidase, central domain|Uncharacterised domain, di-copper centre	GO:0008152|GO:0016491|GO:0004097|GO:0055114	EC:1.10.3.1	KEGG: 00350+1.10.3.1|KEGG: 00950+1.10.3.1|MetaCyc: PWY-5349|MetaCyc: PWY-6752
Dr07710	GO:0003824	NULL	hydrolyzing o-glycosyl	IPR017853|IPR013781	Glycoside hydrolase, superfamily|Glycoside hydrolase, catalytic domain	GO:0003824|GO:0005975	NULL	NULL
Dr07716	GO:0008233	NULL	peptidase m48 family protein	NULL	NULL	NULL	NULL	NULL
Dr07719	NULL	NULL	NULL	IPR013177	Domain of unknown function DUF1713, mitochondria	NULL	NULL	NULL
Dr07674	NULL	NULL	NULL	NULL	NULL	NULL	NULL	NULL
Dr07717	NULL	NULL	NULL	IPR012677	Nucleotide-binding, alpha-beta plait	GO:0000166	NULL	NULL
Dr07724	NULL	NULL	NULL	NULL	NULL	NULL	NULL	NULL
Dr26094	GO:0005488|GO:0009719|GO:0006401|GO:0044699|GO:0010033	NULL	5 -3 exoribonuclease 4-like	IPR027073|IPR004859	5'-3' exoribonuclease|Putative 5-3 exonuclease	GO:0003676|GO:0004527|GO:0005622	NULL	NULL
Dr22093	GO:0009987|GO:0050896|GO:0044699|GO:0005975|GO:0071944|GO:0005737|GO:0016757	NULL	xyloglucan endotransglycosylase	IPR000757|IPR010713|IPR008985|IPR013320|IPR008264|IPR016455	Glycoside hydrolase, family 16|Xyloglucan endo-transglycosylase, C-terminal|Beta-glucanase|Concanavalin A-like lectin/glucanases superfamily|Concanavalin A-like lectin/glucanase, subgroup|Xyloglucan endotransglucosylase/hydrolase	GO:0004553|GO:0005975|GO:0005618|GO:0006073|GO:0016762|GO:0048046	NULL	NULL
Dr22120	NULL	NULL	NULL	NULL	NULL	NULL	NULL	NULL
Dr22128	NULL	NULL	NULL	NULL	NULL	NULL	NULL	NULL
Dr26102	GO:0005488|GO:0009719|GO:0006401|GO:0044699|GO:0010033	NULL	5 -3 expressed	IPR027073|IPR004859	5'-3' exoribonuclease|Putative 5-3 exonuclease	GO:0003676|GO:0004527|GO:0005622	NULL	NULL
Dr22132	GO:0044710|GO:0048856|GO:0046872|GO:0016705|GO:0044767|GO:0004497	NULL	cytochrome p450	IPR001128	Cytochrome P450	GO:0005506|GO:0016705|GO:0020037|GO:0055114	NULL	Reactome: REACT_13433
Dr26105	NULL	NULL	NULL	IPR001938	Thaumatin	NULL	NULL	NULL
Dr22155	NULL	NULL	NULL	NULL	NULL	NULL	NULL	NULL
Dr22159	NULL	NULL	NULL	IPR006598	Lipopolysaccharide-modifying protein	NULL	NULL	NULL
Dr07740	GO:0005488|GO:0005694	NULL	histone h2b	IPR000558|IPR009072	Histone H2B|Histone-fold	GO:0000786|GO:0003677|GO:0005634|GO:0006334|GO:0046982	NULL	NULL
Dr07746	NULL	NULL	NULL	NULL	NULL	NULL	NULL	NULL
Dr07737	NULL	NULL	NULL	NULL	NULL	NULL	NULL	NULL
Dr07739	NULL	NULL	NULL	NULL	NULL	NULL	NULL	NULL
Dr07762	NULL	NULL	NULL	NULL	NULL	NULL	NULL	NULL
Dr07752	NULL	NULL	NULL	IPR013210	Leucine-rich repeat-containing N-terminal, type 2	NULL	NULL	NULL
Dr07753	NULL	NULL	NULL	IPR013210	Leucine-rich repeat-containing N-terminal, type 2	NULL	NULL	NULL
Dr07754	NULL	NULL	NULL	IPR001611|IPR013210|IPR003591	Leucine-rich repeat|Leucine-rich repeat-containing N-terminal, type 2|Leucine-rich repeat, typical subtype	GO:0005515	NULL	NULL
Dr07756	NULL	NULL	NULL	IPR001611|IPR013210	Leucine-rich repeat|Leucine-rich repeat-containing N-terminal, type 2	GO:0005515	NULL	NULL
Dr07767	NULL	NULL	NULL	NULL	NULL	NULL	NULL	NULL
Dr22160	NULL	NULL	NULL	NULL	NULL	NULL	NULL	NULL
Dr22162	GO:0008152|GO:0008233	NULL	subtilisin-like protease sdd1-like	IPR015500|IPR000209|IPR003137|IPR010259|IPR023827	Peptidase S8, subtilisin-related|Peptidase S8/S53 domain|Protease-associated domain, PA|Proteinase inhibitor I9|Peptidase S8, subtilisin, Asp-active site	GO:0004252|GO:0006508|GO:0042802|GO:0043086	NULL	NULL
Dr26116	GO:0005488|GO:0009719|GO:0006401|GO:0044699|GO:0010033	NULL	5 -3 exoribonuclease 4-like	IPR027073|IPR004859	5'-3' exoribonuclease|Putative 5-3 exonuclease	GO:0003676|GO:0004527|GO:0005622	NULL	NULL
Dr26118	GO:0005488|GO:0009719|GO:0006401|GO:0044699|GO:0010033	NULL	5 -	IPR027073|IPR004859	5'-3' exoribonuclease|Putative 5-3 exonuclease	GO:0003676|GO:0004527|GO:0005622	NULL	NULL
Dr26120	NULL	NULL	NULL	IPR001938	Thaumatin	NULL	NULL	NULL
Dr22212	GO:0044763|GO:0009719|GO:0050794|GO:0006351|GO:0010033	NULL	ethylene responsive element binding factor 2	IPR001471|IPR016177	AP2/ERF domain|DNA-binding domain	GO:0003700|GO:0006355|GO:0003677	NULL	NULL
Dr22217	NULL	NULL	NULL	NULL	NULL	NULL	NULL	NULL
Dr26128	GO:0042742|GO:0022626|GO:0019773|GO:0006511|GO:0010043|GO:0005634|GO:0004298	EC:3.4.25.0	proteasome subunit alpha type-2-b	IPR000426	Proteasome, alpha-subunit, N-terminal domain	GO:0004175|GO:0006511|GO:0019773	NULL	Reactome: REACT_11045|Reactome: REACT_13|Reactome: REACT_13635|Reactome: REACT_152|Reactome: REACT_1538|Reactome: REACT_383|Reactome: REACT_578|Reactome: REACT_6185|Reactome: REACT_6850
Dr22221	NULL	NULL	NULL	NULL	NULL	NULL	NULL	NULL
Dr26129	GO:0006508|GO:0004197	EC:3.4.22.0	cysteine proteinase	IPR013128|IPR000668	Peptidase C1A, papain|Peptidase C1A, papain C-terminal	GO:0008234|GO:0006508	NULL	NULL
Dr07782	NULL	NULL	NULL	NULL	NULL	NULL	NULL	NULL
Dr07791	NULL	NULL	NULL	NULL	NULL	NULL	NULL	NULL
Dr07800	NULL	NULL	NULL	IPR002182|IPR027417|IPR000767	NB-ARC|Disease resistance protein|P-loop containing nucleoside triphosphate hydrolase	GO:0043531|GO:0006952	NULL	NULL
Dr07801	NULL	NULL	NULL	NULL	NULL	NULL	NULL	NULL
Dr07859	GO:0016772	NULL	lrr receptor-like serine threonine-protein kinase gso1-like	IPR001611	Leucine-rich repeat	GO:0005515	NULL	NULL
Dr07863	NULL	NULL	NULL	NULL	NULL	NULL	NULL	NULL
Dr07867	GO:0050896|GO:0004674|GO:0016023|GO:0000166|GO:0016310|GO:0016020|GO:0009069	EC:2.7.11.0	l-type lectin-domain containing receptor kinase -like	IPR000719|IPR001220|IPR008985|IPR011009|IPR013320|IPR002290|IPR017441|IPR008271	Protein kinase domain|Legume lectin domain|Concanavalin A-like lectin/glucanases superfamily|Protein kinase-like domain|Concanavalin A-like lectin/glucanase, subgroup|Serine/threonine- / dual specificity protein kinase, catalytic domain|Protein kinase, ATP binding site|Serine/threonine-protein kinase, active site	GO:0004672|GO:0005524|GO:0006468|GO:0030246|GO:0016772|GO:0004674	NULL	NULL
Dr07870	GO:0016023	NULL	pathogenesis-related protein class i	IPR001283|IPR014044	Cysteine-rich secretory protein, allergen V5/Tpx-1-related|CAP domain	NULL	NULL	NULL
Dr07902	GO:0006917|GO:0004197|GO:0006508|GO:0009536	EC:3.4.22.0	metacaspase 1	IPR011600	Peptidase C14, caspase domain	GO:0004197|GO:0006508	NULL	NULL
Dr07825	NULL	NULL	NULL	NULL	NULL	NULL	NULL	NULL
Dr07826	NULL	NULL	NULL	IPR025875|IPR003591	Leucine rich repeat 4|Leucine-rich repeat, typical subtype	NULL	NULL	NULL
Dr07827	NULL	NULL	NULL	IPR002182|IPR027417|IPR000767	NB-ARC|Disease resistance protein|P-loop containing nucleoside triphosphate hydrolase	GO:0043531|GO:0006952	NULL	NULL
Dr07837	NULL	NULL	NULL	NULL	NULL	NULL	NULL	NULL
Dr07899	NULL	NULL	NULL	NULL	NULL	NULL	NULL	NULL
Dr07808	GO:0043484|GO:0003676|GO:0006417|GO:0000932|GO:0000166|GO:0009846|GO:0005634	NULL	polypyrimidine tract-binding	IPR012677	Nucleotide-binding, alpha-beta plait	GO:0000166	NULL	NULL
Dr07824	NULL	NULL	NULL	IPR002182|IPR027417|IPR000767	NB-ARC|Disease resistance protein|P-loop containing nucleoside triphosphate hydrolase	GO:0043531|GO:0006952	NULL	NULL
Dr07838	GO:0000105|GO:0004424|GO:0009536	EC:4.2.1.19	imidazoleglycerol-phosphate dehydratase	IPR000807|IPR003008|IPR020568|IPR000217|IPR002453|IPR020565	Imidazoleglycerol-phosphate dehydratase|Tubulin/FtsZ, GTPase domain|Tubulin|Beta tubulin|Ribosomal protein S5 domain 2-type fold|Imidazoleglycerol-phosphate dehydratase, conserved site	GO:0000105|GO:0004424|GO:0005874|GO:0007017|GO:0005200|GO:0005525	EC:4.2.1.19	KEGG: 00340+4.2.1.19|UniPathway: UPA00031
Dr26131	NULL	NULL	NULL	IPR013210	Leucine-rich repeat-containing N-terminal, type 2	NULL	NULL	NULL
Dr22356	NULL	NULL	NULL	NULL	NULL	NULL	NULL	NULL
Dr22353	NULL	NULL	NULL	IPR001697|IPR015793|IPR015813	Pyruvate kinase|Pyruvate kinase, barrel|Pyruvate/Phosphoenolpyruvate kinase-like domain	GO:0000287|GO:0004743|GO:0006096|GO:0030955|GO:0003824	EC:2.7.1.40	KEGG: 00010+2.7.1.40|KEGG: 00230+2.7.1.40|KEGG: 00620+2.7.1.40|MetaCyc: PWY-1042|MetaCyc: PWY-2221|MetaCyc: PWY-5484|MetaCyc: PWY-5723|MetaCyc: PWY-6142|MetaCyc: PWY-6886|MetaCyc: PWY-6901|MetaCyc: PWY-7003|MetaCyc: PWY-7218|Reactome: REACT_474|UniPathway: UPA00109
Dr07932	GO:0009507	NULL	hypothetical protein SDM1_55t00005 [Solanum demissum]	NULL	NULL	NULL	NULL	NULL
Dr07953	GO:0010425|GO:0090116|GO:0051567|GO:0003886|GO:0010069|GO:0006342|GO:0009294|GO:0003677|GO:0005634|GO:0006555	EC:2.1.1.37	chromomethylase-like protein	NULL	NULL	NULL	NULL	NULL
Dr07954	GO:0090304|GO:0043414|GO:0040029	NULL	chromomethylase 2	NULL	NULL	NULL	NULL	NULL
Dr07958	NULL	NULL	NULL	IPR004252	Probable transposase, Ptta/En/Spm, plant	NULL	NULL	NULL
Dr07975	GO:0016023|GO:0005618|GO:0016787	NULL	nucleoid dna-binding-like protein	IPR001461|IPR021109	Aspartic peptidase|Aspartic peptidase domain	GO:0004190|GO:0006508	NULL	NULL
Dr07981	NULL	NULL	NULL	NULL	NULL	NULL	NULL	NULL
Dr07987	GO:0004124|GO:0006535|GO:0016740|GO:0009333	EC:2.5.1.47	cysteine synthase a	IPR001926|IPR009768|IPR001216	Tryptophan synthase beta subunit-like PLP-dependent enzymes superfamily|Microtubule-associated protein 70|Cysteine synthase/cystathionine beta-synthase P-phosphate-binding site	GO:0007010|GO:0008017|GO:0006535	NULL	NULL
Dr07940	GO:0004672	NULL	serine threonine-protein kinase at5g01020-like	IPR001245|IPR011009	Serine-threonine/tyrosine-protein kinase catalytic domain|Protein kinase-like domain	GO:0004672|GO:0006468|GO:0016772	NULL	NULL
Dr07951	NULL	NULL	NULL	IPR009081|IPR006162	Acyl carrier protein-like|Phosphopantetheine attachment site	NULL	NULL	UniPathway: UPA00094
Dr07965	NULL	NULL	NULL	NULL	NULL	NULL	NULL	NULL
Dr07983	GO:0043565|GO:0005634|GO:0046982|GO:0006355	NULL	nuclear transcription factor y subunit b-3	IPR003957|IPR003958|IPR009072|IPR003956	Transcription factor, NFYB/HAP3 subunit|Transcription factor CBF/NF-Y/archaeal histone|Histone-fold|Transcription factor, NFYB/HAP3, conserved site	GO:0003677|GO:0005622|GO:0043565|GO:0046982|GO:0005634|GO:0006355	NULL	NULL
Dr08024	GO:0005488|GO:0016491|GO:0016023	NULL	flavonoid 3 -hydroxylase	IPR001128|IPR002401|IPR017972	Cytochrome P450|Cytochrome P450, E-class, group I|Cytochrome P450, conserved site	GO:0005506|GO:0016705|GO:0020037|GO:0055114	NULL	Reactome: REACT_13433
Dr07914	NULL	NULL	NULL	NULL	NULL	NULL	NULL	NULL
Dr22426	NULL	NULL	NULL	NULL	NULL	NULL	NULL	NULL
Dr26149	GO:0016740	NULL	dna-dependent rna polymerase	IPR002092	DNA-directed RNA polymerase, phage-type	GO:0003677|GO:0003899|GO:0006351	EC:2.7.7.6	KEGG: 00230+2.7.7.6|KEGG: 00240+2.7.7.6
Dr22473	GO:0016740	NULL	lrr receptor-like serine threonine-protein kinase gso1-like	IPR001611	Leucine-rich repeat	GO:0005515	NULL	NULL
Dr08086	GO:0009536	NULL	bri1-kd interacting protein 118	NULL	NULL	NULL	NULL	NULL
Dr08055	GO:0004553|GO:0005975|GO:0016023	EC:3.2.1.0	hydrolyzing o-glycosyl	IPR017853|IPR013781	Glycoside hydrolase, superfamily|Glycoside hydrolase, catalytic domain	GO:0003824|GO:0005975	NULL	NULL
Dr08068	NULL	NULL	NULL	NULL	NULL	NULL	NULL	NULL
Dr08077	GO:0044238|GO:0009059|GO:0044237	NULL	ethylene-responsive transcription factor win1-like	IPR001471|IPR016177	AP2/ERF domain|DNA-binding domain	GO:0003700|GO:0006355|GO:0003677	NULL	NULL
Dr00284	GO:0005576|GO:0016020|GO:0009664|GO:0006949	NULL	expansin 2	IPR002963|IPR007117|IPR009009|IPR014733|IPR007118|IPR007112	Expansin|Expansin, cellulose-binding-like domain|RlpA-like double-psi beta-barrel domain|Expansin/Lol pI|Barwin-like endoglucanase|Expansin/pollen allergen, DPBB domain	GO:0009664|GO:0005576	NULL	NULL
Dr00307	NULL	NULL	NULL	IPR025322	Protein of unknown function DUF4228, plant	NULL	NULL	NULL
Dr00367	GO:0016024|GO:0003841|GO:0016021|GO:0005783|GO:0042967	EC:2.3.1.51	1-acyl-sn-glycerol-3-phosphate acyltransferase pls1	IPR002123	Phospholipid/glycerol acyltransferase	GO:0008152|GO:0016746	NULL	NULL
Dr00396	GO:0051205|GO:0016021|GO:0005739	NULL	membrane insertion protein and with tetratricopeptide repeat domain-containing protein	NULL	NULL	NULL	NULL	NULL
Dr00337	GO:0016020|GO:0009536	NULL	crt homolog 1-like	IPR003441	NAC domain	GO:0003677|GO:0006355	NULL	NULL
Dr00366	GO:0003676|GO:0005739|GO:0000166	NULL	rna recognition motif-containing protein	IPR000504|IPR012677	RNA recognition motif domain|Nucleotide-binding, alpha-beta plait	GO:0003676|GO:0000166	NULL	NULL
Dr00383	GO:0006412|GO:0005730|GO:0003735|GO:0009941|GO:0071493|GO:0005773|GO:0032502|GO:0022625|GO:0005886|GO:0042254	NULL	protein	IPR016180|IPR018255	Ribosomal protein L10e/L16|Ribosomal protein L10e, conserved site	GO:0003735|GO:0005840|GO:0006412|GO:0005622	NULL	NULL
Dr00387	NULL	NULL	NULL	IPR002715	Nascent polypeptide-associated complex NAC domain	NULL	NULL	NULL
Dr00333	GO:0051015|GO:0051017|GO:0008270|GO:0005886	NULL	pollen-specific protein sf3	IPR001781	Zinc finger, LIM-type	GO:0008270	NULL	NULL
Dr00420	NULL	NULL	NULL	NULL	NULL	NULL	NULL	NULL
Dr00439	GO:0009793	NULL	maternal effect embryo arrest 50 protein	IPR019156	Ataxin-10 domain	NULL	NULL	NULL
Dr00466	NULL	NULL	NULL	IPR004314	Domain of unknown function DUF239	NULL	NULL	NULL
Dr00467	GO:0016032	NULL	replication enhancer protein	IPR000657	Geminivirus AL3 coat protein	GO:0016032	NULL	NULL
Dr00468	GO:0008233|GO:0050896|GO:0016491|GO:0008152	NULL	cysteine proteinase	IPR013128|IPR000668|IPR013201|IPR000169|IPR025660|IPR025661	Peptidase C1A, papain|Peptidase C1A, papain C-terminal|Proteinase inhibitor I29, cathepsin propeptide|Cysteine peptidase, cysteine active site|Cysteine peptidase, histidine active site|Cysteine peptidase, asparagine active site	GO:0008234|GO:0006508	NULL	NULL
Dr00486	GO:0018858|GO:0019761|GO:0018874	EC:6.2.1.25	acyl:coa ligase acetate-coa synthetase-like protein	IPR000873	AMP-dependent synthetase/ligase	GO:0003824|GO:0008152	NULL	NULL
Dr00493	GO:0000166|GO:0055114|GO:0048037|GO:0016616|GO:0008270	EC:1.1.1.0	probable cinnamyl alcohol dehydrogenase 1-like	IPR002085|IPR013149|IPR011032|IPR016040	Alcohol dehydrogenase superfamily, zinc-type|Alcohol dehydrogenase, C-terminal|GroES (chaperonin 10)-like|NAD(P)-binding domain	GO:0008270|GO:0016491|GO:0055114	NULL	NULL
Dr00456	GO:0055047|GO:0009846|GO:0009556|GO:0006075|GO:0080092|GO:0000148|GO:0003843|GO:0052543|GO:0005739|GO:0005982|GO:0005985	EC:2.4.1.34	callose synthase	IPR026953|IPR003440	Callose synthase|Glycosyl transferase, family 48	GO:0003843|GO:0000148|GO:0006075|GO:0016020	EC:2.4.1.34	KEGG: 00500+2.4.1.34|MetaCyc: PWY-6773
Dr00510	GO:0045486|GO:0005506|GO:0055114|GO:0009813	EC:1.14.11.9	protein	IPR005123|IPR026992|IPR027443	Oxoglutarate/iron-dependent dioxygenase|Non-haem dioxygenase N-terminal domain|Isopenicillin N synthase-like	GO:0016491|GO:0016706|GO:0055114	NULL	NULL
Dr00517	NULL	NULL	NULL	NULL	NULL	NULL	NULL	NULL
Dr00519	NULL	NULL	NULL	IPR001841|IPR013083	Zinc finger, RING-type|Zinc finger, RING/FYVE/PHD-type	GO:0005515|GO:0008270	NULL	NULL
Dr00549	NULL	NULL	NULL	NULL	NULL	NULL	NULL	NULL
Dr00611	GO:0016798	NULL	alpha-amylase isozyme 3d	NULL	NULL	NULL	NULL	NULL
Dr00622	GO:0046686|GO:0005886|GO:0005618|GO:0005524|GO:0032440|GO:0009408|GO:0055114	EC:1.3.1.74	97 kda heat shock protein	NULL	NULL	NULL	NULL	NULL
Dr00585	GO:0005737|GO:0008380|GO:0008026|GO:0003723|GO:0006397|GO:0005524|GO:0005634	NULL	dead-box atp-dependent rna helicase	IPR011545|IPR001650|IPR027417|IPR014001|IPR014014|IPR000629	DNA/RNA helicase, DEAD/DEAH box type, N-terminal|Helicase, C-terminal|P-loop containing nucleoside triphosphate hydrolase|Helicase, superfamily 1/2, ATP-binding domain|RNA helicase, DEAD-box type, Q motif|RNA helicase, ATP-dependent, DEAD-box, conserved site	GO:0003676|GO:0005524|GO:0008026|GO:0004386	NULL	NULL
Dr00593	NULL	NULL	NULL	NULL	NULL	NULL	NULL	NULL
Dr22502	GO:0016740	NULL	lrr receptor-like serine threonine-protein kinase gso1-like	IPR025875	Leucine rich repeat 4	NULL	NULL	NULL
Dr22504	NULL	NULL	NULL	NULL	NULL	NULL	NULL	NULL
Dr22570	NULL	NULL	NULL	NULL	NULL	NULL	NULL	NULL
Dr22564	GO:0005763|GO:0003676|GO:0003735|GO:0008137|GO:0006412|GO:0042254|GO:0006120|GO:0006744|GO:0006814|GO:0015992	EC:1.6.5.3	ribosomal protein s12	IPR006032|IPR000440|IPR012340|IPR005679	Ribosomal protein S12/S23|NADH:ubiquinone/plastoquinone oxidoreductase, chain 3|Ribosomal protein S12, bacteria|Nucleic acid-binding, OB-fold	GO:0003735|GO:0005622|GO:0005840|GO:0006412|GO:0008137|GO:0055114|GO:0015935	NULL	NULL
Dr22566	NULL	NULL	NULL	NULL	NULL	NULL	NULL	NULL
Dr22575	NULL	NULL	NULL	NULL	NULL	NULL	NULL	NULL
Dr08096	NULL	NULL	NULL	NULL	NULL	NULL	NULL	NULL
Dr08101	GO:0006468|GO:0005524|GO:0007165|GO:0004683|GO:0009069	EC:2.7.11.17	cbl-interacting serine threonine-protein kinase 8	NULL	NULL	NULL	NULL	NULL
Dr08102	GO:0006468|GO:0005524|GO:0007165|GO:0044464|GO:0004683|GO:0016020|GO:0009069	EC:2.7.11.17	cbl-interacting serine threonine-protein	IPR000719|IPR011009|IPR002290|IPR017441|IPR008271	Protein kinase domain|Protein kinase-like domain|Serine/threonine- / dual specificity protein kinase, catalytic domain|Protein kinase, ATP binding site|Serine/threonine-protein kinase, active site	GO:0004672|GO:0005524|GO:0006468|GO:0016772|GO:0004674	NULL	NULL
Dr08104	GO:0016310|GO:0004674|GO:0000166|GO:0009069	EC:2.7.11.0	probable serine threonine-protein kinase at1g18390-like	IPR011009	Protein kinase-like domain	GO:0016772	NULL	NULL
Dr08127	NULL	NULL	NULL	NULL	NULL	NULL	NULL	NULL
Dr08169	NULL	NULL	NULL	NULL	NULL	NULL	NULL	NULL
Dr08171	GO:0005488	NULL	dna binding	IPR009057	Homeodomain-like	GO:0003677	NULL	NULL
Dr08178	NULL	NULL	NULL	NULL	NULL	NULL	NULL	NULL
Dr08134	GO:0005739	NULL	ser thr-rich protein t10 in dgcr region	NULL	NULL	NULL	NULL	NULL
Dr08149	NULL	NULL	NULL	NULL	NULL	NULL	NULL	NULL
Dr08162	NULL	NULL	NULL	NULL	NULL	NULL	NULL	NULL
Dr22598	GO:0017111	EC:3.6.1.15	abc transporter b family member	NULL	NULL	NULL	NULL	NULL
Dr22600	GO:0010541|GO:0016021|GO:0010329|GO:0010540|GO:0010315|GO:0042626|GO:0055085|GO:0006200|GO:0005886|GO:0005524	NULL	abc transporter b family member	IPR003439|IPR001140|IPR027417|IPR011527|IPR003593|IPR017871	ABC transporter-like|ABC transporter, transmembrane domain|P-loop containing nucleoside triphosphate hydrolase|ABC transporter type 1, transmembrane domain|AAA+ ATPase domain|ABC transporter, conserved site	GO:0005524|GO:0016887|GO:0006810|GO:0016021|GO:0042626|GO:0055085|GO:0000166|GO:0017111	NULL	NULL
Dr22597	GO:0080042|GO:0005739|GO:0080041|GO:0009507	NULL	nudix hydrolase chloroplastic-like	IPR015797	NUDIX hydrolase domain-like	GO:0016787	NULL	NULL
Dr22649	NULL	NULL	NULL	NULL	NULL	NULL	NULL	NULL
Dr22660	NULL	NULL	NULL	IPR013922	Cyclin PHO80-like	GO:0000079|GO:0019901	NULL	NULL
Dr08190	NULL	NULL	NULL	NULL	NULL	NULL	NULL	NULL
Dr08191	NULL	NULL	NULL	NULL	NULL	NULL	NULL	NULL
Dr08197	GO:0005739|GO:0005886|GO:0005773	NULL	nodulin-like protein	IPR010658|IPR016196	Nodulin-like|Major facilitator superfamily domain, general substrate transporter	NULL	NULL	NULL
Dr08199	GO:0003700|GO:0043565|GO:0006355|GO:0005667|GO:0045449	NULL	bzip protein	NULL	NULL	NULL	NULL	NULL
Dr08189	NULL	NULL	NULL	NULL	NULL	NULL	NULL	NULL
Dr08221	GO:0016491	NULL	protein	IPR006094|IPR016166|IPR016167|IPR016169	FAD linked oxidase, N-terminal|FAD-binding, type 2|FAD-binding, type 2, subdomain 1|CO dehydrogenase flavoprotein-like, FAD-binding, subdomain 2	GO:0008762|GO:0016491|GO:0050660|GO:0055114|GO:0003824|GO:0016614	EC:1.3.1.98	KEGG: 00520+1.3.1.98|KEGG: 00550+1.3.1.98|MetaCyc: PWY-6386|MetaCyc: PWY-6387|UniPathway: UPA00219
Dr08222	NULL	NULL	NULL	IPR005299	SAM dependent carboxyl methyltransferase	GO:0008168	NULL	NULL
Dr08227	NULL	NULL	NULL	NULL	NULL	NULL	NULL	NULL
Dr08270	GO:0005840|GO:0003735|GO:0006412|GO:0042254	NULL	mitochondrial ribosomal protein l11	IPR000911|IPR020783|IPR020784|IPR006519	Ribosomal protein L11|Ribosomal protein L11, C-terminal|Ribosomal protein L11, N-terminal|Ribosomal protein L11, bacterial-type	GO:0003735|GO:0005840|GO:0006412	NULL	NULL
Dr08312	NULL	NULL	NULL	NULL	NULL	NULL	NULL	NULL
Dr08320	NULL	NULL	NULL	IPR002885	Pentatricopeptide repeat	NULL	NULL	NULL
Dr08252	NULL	NULL	NULL	IPR004182	GRAM domain	NULL	NULL	NULL
Dr22703	NULL	NULL	NULL	IPR004855|IPR009083|IPR013028	Transcription factor IIA, alpha/beta subunit|Transcription factor IIA, helical|Transcription factor IIA, alpha subunit, N-terminal	GO:0005672|GO:0006367	NULL	NULL
Dr22704	GO:0005737|GO:0016874|GO:0016746|GO:0000166	NULL	atp-citrate lyase a-3	IPR013650|IPR016102|IPR013816	ATP-grasp fold, succinyl-CoA synthetase-type|Succinyl-CoA synthetase-like|ATP-grasp fold, subdomain 2	GO:0005524	EC:6.2.1.5	KEGG: 00020+6.2.1.5|KEGG: 00640+6.2.1.5|KEGG: 00660+6.2.1.5|KEGG: 00720+6.2.1.5|MetaCyc: PWY-5392|MetaCyc: PWY-5537|MetaCyc: PWY-5538|MetaCyc: PWY-5690|MetaCyc: PWY-5913|MetaCyc: PWY-6728|MetaCyc: PWY-6969|UniPathway: UPA00223
Dr22707	NULL	NULL	NULL	NULL	NULL	NULL	NULL	NULL
Dr26174	NULL	NULL	NULL	NULL	NULL	NULL	NULL	NULL
Dr22723	GO:0005488|GO:0005739	NULL	regulator of chromosome condensation repeat-containing protein	IPR009091	Regulator of chromosome condensation 1/beta-lactamase-inhibitor protein II	NULL	NULL	NULL
Dr26176	NULL	NULL	NULL	NULL	NULL	NULL	NULL	NULL
Dr22780	NULL	NULL	NULL	NULL	NULL	NULL	NULL	NULL
Dr08349	GO:0003995|GO:0005777|GO:0009620|GO:0003997|GO:0009611|GO:0009695|GO:0006635|GO:0009555|GO:0050660|GO:0002213|GO:0001676|GO:0046686|GO:0006118|GO:0006637	EC:1.3.99.3|EC:1.3.3.6	peroxisomal acyl- oxidase 1a	IPR012258|IPR002655|IPR006091|IPR009075|IPR009100|IPR013786	Acyl-CoA oxidase|Acyl-CoA oxidase, C-terminal|Acyl-CoA oxidase/dehydrogenase, central domain|Acyl-CoA dehydrogenase/oxidase C-terminal|Acyl-CoA dehydrogenase/oxidase, N-terminal and middle domain|Acyl-CoA dehydrogenase/oxidase, N-terminal	GO:0003997|GO:0005777|GO:0006631|GO:0050660|GO:0055114|GO:0006635|GO:0003995|GO:0016627|GO:0008152	EC:1.3.3.6	KEGG: 00071+1.3.3.6|KEGG: 00592+1.3.3.6|MetaCyc: PWY-5136|MetaCyc: PWY-6837|MetaCyc: PWY-6920|MetaCyc: PWY-7007|MetaCyc: PWY-735
Dr08331	NULL	NULL	NULL	IPR010402	CCT domain	GO:0005515	NULL	NULL
Dr08384	NULL	NULL	NULL	IPR001395|IPR023210	Aldo/keto reductase|NADP-dependent oxidoreductase domain	NULL	NULL	NULL
Dr08475	GO:0010038|GO:0005739|GO:0016765|GO:0000166|GO:0006535|GO:0004124|GO:0016020|GO:0009333	EC:2.5.1.0|EC:2.5.1.47	cysteine synthase	IPR001926	Tryptophan synthase beta subunit-like PLP-dependent enzymes superfamily	NULL	NULL	NULL
Dr08405	NULL	NULL	NULL	NULL	NULL	NULL	NULL	NULL
Dr08406	NULL	NULL	NULL	NULL	NULL	NULL	NULL	NULL
Dr08420	NULL	NULL	NULL	NULL	NULL	NULL	NULL	NULL
Dr08461	GO:0005802|GO:0016192|GO:0005086|GO:0043087	NULL	armadillo beta-catenin-like repeat-containing protein	NULL	NULL	NULL	NULL	NULL
Dr08396	GO:0016491	NULL	aldo keto	IPR001395|IPR023210	Aldo/keto reductase|NADP-dependent oxidoreductase domain	NULL	NULL	NULL
Dr08385	NULL	NULL	NULL	IPR001395|IPR023210	Aldo/keto reductase|NADP-dependent oxidoreductase domain	NULL	NULL	NULL
Dr08438	GO:0043229|GO:0005488|GO:0044444|GO:0003824	NULL	methylcrotonoyl- carboxylase subunit alpha	IPR000089|IPR006527|IPR011053|IPR013816|IPR017451|IPR001882	Biotin/lipoyl attachment|F-box associated domain, type 1|Single hybrid motif|ATP-grasp fold, subdomain 2|F-box associated interaction domain|Biotin-binding site	GO:0005524	NULL	NULL
Dr22838	GO:0043231|GO:0009628|GO:1901700|GO:0050794|GO:0003824|GO:0006950	NULL	abscisic insensitive 1b	IPR015655|IPR001932	Protein phosphatase 2C|Protein phosphatase 2C (PP2C)-like domain	GO:0003824	NULL	NULL
Dr22875	GO:0046872|GO:0008652|GO:0044444|GO:0008172	NULL	methionine synthase	IPR002629|IPR013215	Methionine synthase, vitamin-B12 independent|Cobalamin (vitamin B12)-independent methionine synthase MetE, N-terminal	GO:0003871|GO:0009086|GO:0008270|GO:0008652	EC:2.1.1.14	KEGG: 00270+2.1.1.14|KEGG: 00450+2.1.1.14|MetaCyc: PWY-5041|MetaCyc: PWY-6151|MetaCyc: PWY-6936|MetaCyc: PWY-702|UniPathway: UPA00051
Dr08510	GO:0010541|GO:0000166|GO:0016021|GO:0010329|GO:0010540|GO:0010315|GO:0042626|GO:0055085|GO:0005886	NULL	abc transporter b family member	IPR003439|IPR001140|IPR027417|IPR011527|IPR003593|IPR017871	ABC transporter-like|ABC transporter, transmembrane domain|P-loop containing nucleoside triphosphate hydrolase|ABC transporter type 1, transmembrane domain|AAA+ ATPase domain|ABC transporter, conserved site	GO:0005524|GO:0016887|GO:0006810|GO:0016021|GO:0042626|GO:0055085|GO:0000166|GO:0017111	NULL	NULL
Dr08519	GO:0003824|GO:0043167|GO:0097159|GO:1901363	NULL	chromatin remodeling complex subunit	IPR000330|IPR001650|IPR001841|IPR027417|IPR013083|IPR017907	SNF2-related|Helicase, C-terminal|Zinc finger, RING-type|P-loop containing nucleoside triphosphate hydrolase|Zinc finger, RING/FYVE/PHD-type|Zinc finger, RING-type, conserved site	GO:0003677|GO:0005524|GO:0003676|GO:0004386|GO:0005515|GO:0008270	NULL	NULL
Dr08489	NULL	NULL	NULL	NULL	NULL	NULL	NULL	NULL
Dr08499	GO:0016020|GO:0006810|GO:0005215	NULL	peptide transporter ptr2	IPR000109|IPR016196	Proton-dependent oligopeptide transporter family|Major facilitator superfamily domain, general substrate transporter	GO:0005215|GO:0006810|GO:0016020	NULL	Reactome: REACT_15518|Reactome: REACT_19419
Dr08490	GO:0005737|GO:0003723|GO:0006412	NULL	initiation factor 3g	IPR017334|IPR024675|IPR012677	Eukaryotic translation initiation factor 3 subunit G|Eukaryotic translation initiation factor 3 subunit G, N-terminal|Nucleotide-binding, alpha-beta plait	GO:0003743|GO:0005737|GO:0005852|GO:0000166	NULL	NULL
Dr08544	NULL	NULL	NULL	NULL	NULL	NULL	NULL	NULL
Dr08522	GO:0016023|GO:0005783	NULL	reticulon-like protein b22	NULL	NULL	NULL	NULL	NULL
Dr08528	NULL	NULL	NULL	NULL	NULL	NULL	NULL	NULL
Dr22966	NULL	NULL	NULL	NULL	NULL	NULL	NULL	NULL
Dr22969	NULL	NULL	NULL	NULL	NULL	NULL	NULL	NULL
Dr22970	GO:0016023|GO:0004713|GO:0006468|GO:0005524|GO:0016020|GO:0004674|GO:0009069	EC:2.7.10.0|EC:2.7.11.0	rust resistance kinase lr10	IPR000719|IPR011009|IPR002290|IPR008271	Protein kinase domain|Protein kinase-like domain|Serine/threonine- / dual specificity protein kinase, catalytic domain|Serine/threonine-protein kinase, active site	GO:0004672|GO:0005524|GO:0006468|GO:0016772|GO:0004674	NULL	NULL
Dr22963	GO:0016023|GO:0004713|GO:0006468|GO:0005524|GO:0016020|GO:0004674|GO:0005739|GO:0009069	EC:2.7.10.0|EC:2.7.11.0	rust resistance kinase lr10	IPR000719|IPR011009|IPR002290|IPR017441|IPR008271	Protein kinase domain|Protein kinase-like domain|Serine/threonine- / dual specificity protein kinase, catalytic domain|Protein kinase, ATP binding site|Serine/threonine-protein kinase, active site	GO:0004672|GO:0005524|GO:0006468|GO:0016772|GO:0004674	NULL	NULL
Dr22973	GO:0048856|GO:0004672|GO:0016491|GO:0016023|GO:0000166|GO:0016310|GO:0007275|GO:0016020	NULL	lrr receptor-like serine threonine-protein kinase gso1-like	IPR001611	Leucine-rich repeat	GO:0005515	NULL	NULL
Dr08632	GO:0020037|GO:0016705|GO:0004497|GO:0005506|GO:0009055|GO:0055114|GO:0006118	NULL	cytochrome p450 monooxygenase cyp704g7	IPR001128|IPR002401	Cytochrome P450|Cytochrome P450, E-class, group I	GO:0005506|GO:0016705|GO:0020037|GO:0055114	NULL	Reactome: REACT_13433
Dr08637	GO:0016023|GO:0008152|GO:0008236	NULL	subtilisin-like protease sdd1-like	IPR015500|IPR000209|IPR003137|IPR010259|IPR023827	Peptidase S8, subtilisin-related|Peptidase S8/S53 domain|Protease-associated domain, PA|Proteinase inhibitor I9|Peptidase S8, subtilisin, Asp-active site	GO:0004252|GO:0006508|GO:0042802|GO:0043086	NULL	NULL
Dr08590	NULL	NULL	NULL	NULL	NULL	NULL	NULL	NULL
Dr08617	GO:0008233	NULL	subtilisin-like serine protease	IPR015500|IPR003137|IPR000209	Peptidase S8, subtilisin-related|Protease-associated domain, PA|Peptidase S8/S53 domain	GO:0004252|GO:0006508	NULL	NULL
Dr08666	GO:0005739	NULL	regulator of nonsense transcripts-like protein	NULL	NULL	NULL	NULL	NULL
Dr08684	NULL	NULL	NULL	NULL	NULL	NULL	NULL	NULL
Dr08711	NULL	NULL	NULL	NULL	NULL	NULL	NULL	NULL
Dr08660	GO:0005230|GO:0004930|GO:0006875|GO:0007166|GO:0030004|GO:0016020|GO:0006811	NULL	glutamate-gated kainate-type ion channel receptor subunit 5	IPR001320|IPR001638|IPR001828|IPR028082|IPR002455|IPR017103	Ionotropic glutamate receptor|Extracellular solute-binding protein, family 3|Extracellular ligand-binding receptor|GPCR, family 3, gamma-aminobutyric acid receptor, type B|Periplasmic binding protein-like I|Ionotropic glutamate receptor, plant	GO:0004970|GO:0005234|GO:0016020|GO:0005215|GO:0006810|GO:0004965|GO:0007186|GO:0016021	NULL	NULL
Dr08691	GO:0008483	EC:2.6.1.0	kynurenine-oxoglutarate transaminase	IPR004839|IPR015424|IPR015421|IPR015422	Aminotransferase, class I/classII|Pyridoxal phosphate-dependent transferase|Pyridoxal phosphate-dependent transferase, major region, subdomain 1|Pyridoxal phosphate-dependent transferase, major region, subdomain 2	GO:0009058|GO:0030170|GO:0003824	NULL	NULL
Dr23008	NULL	NULL	NULL	IPR001854	Ribosomal protein L29	GO:0003735|GO:0005622|GO:0005840|GO:0006412	NULL	NULL
Dr23029	GO:0005739	NULL	protein gdap2 homolog	IPR001251	CRAL-TRIO domain	NULL	NULL	NULL
Dr23032	GO:0051707|GO:0006633|GO:0055114|GO:0046872|GO:0009611|GO:0016740|GO:0016165|GO:0005737	EC:1.13.11.12	lipoxygenase	IPR000907|IPR013819|IPR027433|IPR001246	Lipoxygenase|Lipoxygenase, C-terminal|Lipoxygenase, plant|Lipoxygenase, domain 3	GO:0016702|GO:0046872|GO:0055114|GO:0005506|GO:0016165	NULL	UniPathway: UPA00382
Dr08781	GO:0003676|GO:0006259|GO:0016491	NULL	retrotransposon unclassified	NULL	NULL	NULL	NULL	NULL
Dr08739	NULL	NULL	NULL	IPR008889	VQ	NULL	NULL	NULL
Dr08716	NULL	NULL	NULL	IPR001906|IPR005630|IPR008930|IPR008949	Terpene synthase, N-terminal domain|Terpene synthase, metal-binding domain|Terpenoid cyclases/protein prenyltransferase alpha-alpha toroid|Terpenoid synthase	GO:0008152|GO:0010333|GO:0016829|GO:0000287	NULL	NULL
Dr08724	GO:0016836|GO:0005739	EC:4.2.1.0	protein	IPR001086|IPR018528	Prephenate dehydratase|Prephenate dehydratase, conserved site	GO:0004664|GO:0009094	EC:4.2.1.51	KEGG: 00400+4.2.1.51|UniPathway: UPA00121
Dr08787	NULL	NULL	NULL	NULL	NULL	NULL	NULL	NULL
Dr08790	GO:0009987	NULL	suppressor of overexpression of constans 1	IPR002487	Transcription factor, K-box	GO:0003700|GO:0005634|GO:0006355	NULL	NULL
Dr08797	NULL	NULL	NULL	IPR006458	Ovate protein family, C-terminal	NULL	NULL	NULL
Dr08857	NULL	NULL	NULL	NULL	NULL	NULL	NULL	NULL
Dr08817	GO:0016491	NULL	cytochrome	IPR001128|IPR002401|IPR017972	Cytochrome P450|Cytochrome P450, E-class, group I|Cytochrome P450, conserved site	GO:0005506|GO:0016705|GO:0020037|GO:0055114	NULL	Reactome: REACT_13433
Dr08820	GO:0016491	NULL	cytochrome p450 89a2-like	IPR001128|IPR002401|IPR017972	Cytochrome P450|Cytochrome P450, E-class, group I|Cytochrome P450, conserved site	GO:0005506|GO:0016705|GO:0020037|GO:0055114	NULL	Reactome: REACT_13433
Dr08821	GO:0016491	NULL	cytochrome	IPR001128|IPR002401|IPR017972	Cytochrome P450|Cytochrome P450, E-class, group I|Cytochrome P450, conserved site	GO:0005506|GO:0016705|GO:0020037|GO:0055114	NULL	Reactome: REACT_13433
Dr08822	GO:0016491|GO:0005488	NULL	cytochrome	IPR001128|IPR002401|IPR017972	Cytochrome P450|Cytochrome P450, E-class, group I|Cytochrome P450, conserved site	GO:0005506|GO:0016705|GO:0020037|GO:0055114	NULL	Reactome: REACT_13433
Dr08824	NULL	NULL	NULL	IPR021099	Plant organelle RNA recognition domain	NULL	NULL	NULL
Dr23065	GO:0016740	NULL	lrr receptor-like serine threonine-protein kinase gso1-like	IPR001611|IPR003591	Leucine-rich repeat|Leucine-rich repeat, typical subtype	GO:0005515	NULL	NULL
Dr23071	NULL	NULL	NULL	IPR004265	Plant disease resistance response protein	NULL	NULL	NULL
Dr23068	NULL	NULL	NULL	IPR003613|IPR013083	U box domain|Zinc finger, RING/FYVE/PHD-type	GO:0000151|GO:0004842|GO:0016567	NULL	NULL
Dr23067	GO:0005488|GO:0044763|GO:0044446|GO:0005694|GO:0005634	NULL	histone h4	IPR004265|IPR009072|IPR001951	Plant disease resistance response protein|Histone-fold|Histone H4	GO:0046982|GO:0000786|GO:0003677|GO:0005634|GO:0006334	NULL	NULL
Dr23069	NULL	NULL	NULL	IPR004265	Plant disease resistance response protein	NULL	NULL	NULL
Dr23070	NULL	NULL	NULL	IPR004265	Plant disease resistance response protein	NULL	NULL	NULL
Dr23107	NULL	NULL	NULL	IPR001878|IPR015880|IPR007087	Zinc finger, CCHC-type|Zinc finger, C2H2-like|Zinc finger, C2H2	GO:0003676|GO:0008270|GO:0046872	NULL	NULL
Dr08930	GO:0008152	NULL	histidine triad family protein	IPR001310|IPR011146|IPR019808	Histidine triad (HIT) protein|HIT-like domain|Histidine triad, conserved site	GO:0003824	NULL	NULL
Dr08880	NULL	NULL	NULL	NULL	NULL	NULL	NULL	NULL
Dr08869	GO:0017060|GO:0032580|GO:0016021|GO:0010493|GO:0016023|GO:0006486|GO:0036065|GO:0009247	EC:2.4.1.65	alpha-( )-fucosyltransferase-like	IPR001503	Glycosyl transferase, family 10	GO:0006486|GO:0008417|GO:0016020	NULL	UniPathway: UPA00378
Dr09029	GO:0016788|GO:0016023|GO:0009505|GO:0004560|GO:0006629|GO:0005975	EC:3.2.1.51	alpha-l-fucosidase 2	IPR013831	SGNH hydrolase-type esterase domain	GO:0016787	NULL	NULL
Dr09024	GO:0008270	NULL	transposon unclassified	IPR004330	FAR1 DNA binding domain	NULL	NULL	NULL
Dr26198	NULL	NULL	NULL	NULL	NULL	NULL	NULL	NULL
Dr09050	GO:0004553|GO:0016023|GO:0005975	EC:3.2.1.0	glucan endo- -beta-glucosidase	IPR017853|IPR013781	Glycoside hydrolase, superfamily|Glycoside hydrolase, catalytic domain	GO:0003824|GO:0005975	NULL	NULL
Dr09039	NULL	NULL	NULL	NULL	NULL	NULL	NULL	NULL
Dr09040	NULL	NULL	NULL	NULL	NULL	NULL	NULL	NULL
Dr09041	NULL	NULL	NULL	NULL	NULL	NULL	NULL	NULL
Dr09052	NULL	NULL	NULL	NULL	NULL	NULL	NULL	NULL
Dr09070	GO:0016772	NULL	lrr receptor-like serine threonine-protein kinase gso1-like	IPR001611	Leucine-rich repeat	GO:0005515	NULL	NULL
Dr09075	GO:0003824	NULL	pyruvate decarboxylase	NULL	NULL	NULL	NULL	NULL
Dr09066	NULL	NULL	NULL	NULL	NULL	NULL	NULL	NULL
Dr09099	GO:0005739|GO:0044260|GO:0097159|GO:0090304|GO:1901363	NULL	dna repair protein reca-like protein	NULL	NULL	NULL	NULL	NULL
Dr09104	NULL	NULL	NULL	IPR002885	Pentatricopeptide repeat	NULL	NULL	NULL
Dr09131	NULL	NULL	NULL	NULL	NULL	NULL	NULL	NULL
Dr09167	GO:0008152|GO:0016491|GO:0050896	NULL	aldehyde dehydrogenase family 7 member a1	IPR015590|IPR016161|IPR016163|IPR016162|IPR016160	Aldehyde dehydrogenase domain|Aldehyde/histidinol dehydrogenase|Aldehyde dehydrogenase, C-terminal|Aldehyde dehydrogenase, N-terminal|Aldehyde dehydrogenase, conserved site	GO:0008152|GO:0016491|GO:0055114|GO:0016620	NULL	NULL
Dr09168	GO:0050896|GO:0009536|GO:0016616|GO:0000166|GO:0008152	EC:1.1.1.0	short-chain dehydrogenase reductase	IPR002198|IPR016040|IPR002347|IPR020904	Short-chain dehydrogenase/reductase SDR|Glucose/ribitol dehydrogenase|NAD(P)-binding domain|Short-chain dehydrogenase/reductase, conserved site	GO:0008152|GO:0016491	NULL	NULL
Dr09171	NULL	NULL	NULL	IPR026054|IPR015943	Nuclear pore complex protein|WD40/YVTN repeat-like-containing domain	GO:0005515	NULL	NULL
Dr09204	GO:0006468|GO:0004674|GO:0016023|GO:0005524|GO:0009069	EC:2.7.11.0	feronia receptor-like kinase	IPR001245|IPR024788|IPR011009|IPR013320|IPR002290|IPR000719|IPR017441|IPR008271	Serine-threonine/tyrosine-protein kinase catalytic domain|Malectin-like carbohydrate-binding domain|Protein kinase-like domain|Concanavalin A-like lectin/glucanase, subgroup|Serine/threonine- / dual specificity protein kinase, catalytic domain|Protein kinase domain|Protein kinase, ATP binding site|Serine/threonine-protein kinase, active site	GO:0004672|GO:0006468|GO:0016772|GO:0005524|GO:0004674	NULL	NULL
Dr09207	GO:0006468|GO:0004674|GO:0016023|GO:0005524|GO:0009069	EC:2.7.11.0	feronia receptor-like kinase	IPR001245|IPR024788|IPR011009|IPR013320|IPR002290|IPR000719|IPR017441|IPR008271	Serine-threonine/tyrosine-protein kinase catalytic domain|Malectin-like carbohydrate-binding domain|Protein kinase-like domain|Concanavalin A-like lectin/glucanase, subgroup|Serine/threonine- / dual specificity protein kinase, catalytic domain|Protein kinase domain|Protein kinase, ATP binding site|Serine/threonine-protein kinase, active site	GO:0004672|GO:0006468|GO:0016772|GO:0005524|GO:0004674	NULL	NULL
Dr09195	NULL	NULL	NULL	IPR011992|IPR002048|IPR018247	EF-hand domain pair|EF-hand domain|EF-Hand 1, calcium-binding site	GO:0005509	NULL	NULL
Dr23194	GO:0055085|GO:0010338|GO:0009925|GO:0016021|GO:0048830|GO:0010358|GO:0009926|GO:0009921|GO:0009908|GO:0010051|GO:0010229|GO:0005215|GO:0009630|GO:0048826|GO:0005737|GO:0045177	NULL	auxin efflux carrier	IPR004776	Auxin efflux carrier	GO:0016021|GO:0055085	NULL	NULL
Dr23208	NULL	NULL	NULL	IPR002182|IPR027417	NB-ARC|P-loop containing nucleoside triphosphate hydrolase	GO:0043531	NULL	NULL
Dr23249	NULL	NULL	NULL	IPR009072	Histone-fold	GO:0046982	NULL	NULL
Dr09236	NULL	NULL	NULL	NULL	NULL	NULL	NULL	NULL
Dr09233	GO:0005488	NULL	retrotransposon gag protein	IPR005162	Retrotransposon gag domain	NULL	NULL	NULL
Dr23255	GO:0045694|GO:0003676|GO:0005634|GO:0008270|GO:0005829	NULL	splicing factor 3a subunit 3-like	IPR021966	Splicing factor SF3a60 binding domain	NULL	NULL	NULL
Dr09255	NULL	NULL	NULL	IPR004873	BURP domain	NULL	NULL	NULL
Dr09365	NULL	NULL	NULL	NULL	NULL	NULL	NULL	NULL
Dr09381	GO:0016740	NULL	periodic tryptophan protein 2	IPR027145|IPR007148|IPR015943	Periodic tryptophan protein 2|Small-subunit processome, Utp12|WD40/YVTN repeat-like-containing domain	GO:0005515	NULL	NULL
Dr09336	GO:0016772	NULL	probable lrr receptor-like serine threonine-protein kinase at1g53440-like	IPR001245|IPR021720|IPR011009|IPR013320|IPR002290|IPR000719|IPR017441|IPR008271	Serine-threonine/tyrosine-protein kinase catalytic domain|Malectin|Protein kinase-like domain|Concanavalin A-like lectin/glucanase, subgroup|Serine/threonine- / dual specificity protein kinase, catalytic domain|Protein kinase domain|Protein kinase, ATP binding site|Serine/threonine-protein kinase, active site	GO:0004672|GO:0006468|GO:0016772|GO:0005524|GO:0004674	NULL	NULL
Dr09312	NULL	NULL	NULL	IPR004252	Probable transposase, Ptta/En/Spm, plant	NULL	NULL	NULL
Dr09471	GO:0003676|GO:0005634|GO:0005886	NULL	alba dna rna-binding protein	IPR002775	DNA/RNA-binding protein Alba-like	GO:0003676	NULL	NULL
Dr09423	GO:0055114|GO:0050113|GO:0019310|GO:0019853|GO:0006949|GO:0005737|GO:0005506	EC:1.13.99.1	myo-inositol oxygenase	IPR007828|IPR007018	Inositol oxygenase|Mediator complex, subunit Med6	GO:0005506|GO:0005737|GO:0019310|GO:0050113|GO:0055114|GO:0001104|GO:0006357|GO:0016592	EC:1.13.99.1	KEGG: 00053+1.13.99.1|KEGG: 00562+1.13.99.1|MetaCyc: PWY-4841|UniPathway: UPA00111
Dr09454	NULL	NULL	NULL	NULL	NULL	NULL	NULL	NULL
Dr09476	NULL	NULL	NULL	IPR008422|IPR006563|IPR009057	Homeobox KN domain|POX domain|Homeodomain-like	GO:0003677|GO:0006355	NULL	NULL
Dr09384	GO:0006810|GO:0044763|GO:0017111|GO:0016020|GO:0043231|GO:0051707|GO:0006952|GO:0044444	EC:3.6.1.15	atp-binding cassette	IPR003439|IPR013525|IPR013581|IPR027417|IPR003593	ABC transporter-like|ABC-2 type transporter|Plant PDR ABC transporter associated|P-loop containing nucleoside triphosphate hydrolase|AAA+ ATPase domain	GO:0005524|GO:0016887|GO:0016020|GO:0000166|GO:0017111	NULL	NULL
Dr09385	GO:0044699|GO:0016020|GO:0044464|GO:0051179|GO:0016887|GO:0009987|GO:0006952	EC:3.6.1.3	atp-binding cassette	IPR013525	ABC-2 type transporter	GO:0016020	NULL	NULL
Dr09386	GO:0015691|GO:0051716|GO:1901136|GO:0016020|GO:0000166|GO:0009507|GO:0046700|GO:1901361|GO:1901565|GO:0009814|GO:0015075|GO:0044281|GO:0019439|GO:0016887|GO:0044270|GO:1901700|GO:1901658|GO:0009725	EC:3.6.1.3	abc transporter family pleiotropic drug resistance protein	IPR008207|IPR003340|IPR015300|IPR027417	Signal transduction histidine kinase, phosphotransfer (Hpt) domain|B3 DNA binding domain|DNA-binding pseudobarrel domain|P-loop containing nucleoside triphosphate hydrolase	GO:0000160|GO:0004871|GO:0003677	NULL	NULL
Dr09438	GO:0044763|GO:0016772|GO:0016023|GO:0050896|GO:0008152	NULL	protein	IPR001611|IPR001245|IPR013210|IPR011009|IPR013320|IPR002290|IPR003591|IPR000719|IPR017441|IPR008271	Leucine-rich repeat|Serine-threonine/tyrosine-protein kinase catalytic domain|Leucine-rich repeat-containing N-terminal, type 2|Protein kinase-like domain|Concanavalin A-like lectin/glucanase, subgroup|Serine/threonine- / dual specificity protein kinase, catalytic domain|Leucine-rich repeat, typical subtype|Protein kinase domain|Protein kinase, ATP binding site|Serine/threonine-protein kinase, ac…	GO:0005515|GO:0004672|GO:0006468|GO:0016772|GO:0005524|GO:0004674	NULL	NULL
Dr09450	GO:0016020|GO:0005739	NULL	cationic amino acid transporter	IPR002293	Amino acid/polyamine transporter I	GO:0003333|GO:0015171|GO:0016020	NULL	NULL
Dr00659	GO:0016021|GO:0006812|GO:0055085|GO:0015299|GO:0006885	NULL	cation proton exchanger	NULL	NULL	NULL	NULL	NULL
Dr00660	GO:0016020|GO:0006810	NULL	cation proton exchanger	NULL	NULL	NULL	NULL	NULL
Dr00667	NULL	NULL	NULL	NULL	NULL	NULL	NULL	NULL
Dr00648	NULL	NULL	NULL	IPR008004	Uncharacterised protein family UPF0503	NULL	NULL	NULL
Dr00696	NULL	NULL	NULL	IPR001117|IPR011706|IPR008972|IPR002355	Multicopper oxidase, type 1|Multicopper oxidase, type 2|Cupredoxin|Multicopper oxidase, copper-binding site	GO:0016491|GO:0055114|GO:0005507	NULL	NULL
Dr00806	NULL	NULL	NULL	NULL	NULL	NULL	NULL	NULL
Dr00800	GO:0043231|GO:0044444	NULL	protein	IPR006597|IPR011990	Sel1-like|Tetratricopeptide-like helical	GO:0005515	NULL	NULL
Dr00819	GO:0016740	NULL	diacylglycerol kinase 5	IPR000756|IPR001206|IPR016064	Diacylglycerol kinase, accessory domain|Diacylglycerol kinase, catalytic domain|ATP-NAD kinase-like domain	GO:0004143|GO:0007205|GO:0003951|GO:0008152	EC:2.7.1.107	KEGG: 00561+2.7.1.107|KEGG: 00564+2.7.1.107|MetaCyc: PWY-7039|Reactome: REACT_14797|Reactome: REACT_604
Dr00775	GO:0005488	NULL	molecular chaperone hsp40 -like protein	IPR000608|IPR001623|IPR002939|IPR008971|IPR016135|IPR001305|IPR012724	Ubiquitin-conjugating enzyme, E2|DnaJ domain|Chaperone DnaJ, C-terminal|HSP40/DnaJ peptide-binding|Ubiquitin-conjugating enzyme/RWD-like|Heat shock protein DnaJ, cysteine-rich domain|Chaperone DnaJ	GO:0016881|GO:0006457|GO:0051082|GO:0031072|GO:0005524|GO:0009408	NULL	NULL
Dr00763	NULL	NULL	NULL	IPR011992|IPR002048|IPR018247	EF-hand domain pair|EF-hand domain|EF-Hand 1, calcium-binding site	GO:0005509	NULL	NULL
Dr00853	GO:0005759|GO:0005525|GO:0005743|GO:0009507|GO:0006184|GO:0043022|GO:0045727|GO:0003924	NULL	gtp-binding protein	NULL	NULL	NULL	NULL	NULL
Dr00821	NULL	NULL	NULL	IPR022251	Protein of unknown function wound-induced	NULL	NULL	NULL
Dr00834	GO:0046872|GO:0016491|GO:0016023|GO:0016020	NULL	cytochrome p450	IPR001128|IPR002401	Cytochrome P450|Cytochrome P450, E-class, group I	GO:0005506|GO:0016705|GO:0020037|GO:0055114	NULL	Reactome: REACT_13433
Dr00838	NULL	NULL	NULL	IPR001128	Cytochrome P450	GO:0005506|GO:0016705|GO:0020037|GO:0055114	NULL	Reactome: REACT_13433
Dr00861	NULL	NULL	NULL	IPR022692	Geminivirus AL1 replication-associated protein, central domain	GO:0016888	NULL	NULL
Dr00884	GO:0004553|GO:0016023|GO:0005975	EC:3.2.1.0	glucan endo- -beta-glucosidase	IPR000490|IPR017853|IPR013781	Glycoside hydrolase, family 17|Glycoside hydrolase, superfamily|Glycoside hydrolase, catalytic domain	GO:0004553|GO:0005975|GO:0003824	EC:3.2.1.39	KEGG: 00500+3.2.1.39
Dr00920	NULL	NULL	NULL	NULL	NULL	NULL	NULL	NULL
Dr00934	NULL	NULL	NULL	NULL	NULL	NULL	NULL	NULL
Dr00888	NULL	NULL	NULL	IPR000626|IPR019955	Ubiquitin domain|Ubiquitin supergroup	GO:0005515	NULL	NULL
Dr00994	GO:0008233|GO:0016023|GO:0006465|GO:0005618|GO:0016021|GO:0005787	NULL	signal peptidase complex subunit 3b	IPR007653|IPR022690|IPR001301	Signal peptidase 22kDa subunit|Geminivirus AL1 replication-associated protein, catalytic domain|Geminivirus AL1 replication-associated protein, CLV type	GO:0005787|GO:0006465|GO:0008233|GO:0016021|GO:0006260|GO:0005198|GO:0019028	EC:3.4.-.-|EC:2.7.7.-	KEGG: 00310+3.4.-.-|KEGG: 00550+3.4.-.-|KEGG: 00780+3.4.-.-|KEGG: 00520+2.7.7.-
Dr00998	GO:0008565|GO:0006606|GO:0005737|GO:0005634	NULL	importin subunit alpha-1	IPR016024|IPR011989	Armadillo-type fold|Armadillo-like helical	GO:0005488	NULL	NULL
Dr00999	NULL	NULL	NULL	IPR008906|IPR025525|IPR012337|IPR003656	HAT dimerisation domain, C-terminal|Domain of unknown function DUF4413|Ribonuclease H-like domain|Zinc finger, BED-type predicted	GO:0046983|GO:0003676|GO:0003677	NULL	NULL
Dr00962	GO:0003676	NULL	polyadenylate-binding protein 2-like	IPR000504|IPR002004|IPR012677|IPR003954|IPR006515	RNA recognition motif domain|Polyadenylate-binding protein/Hyperplastic disc protein|Nucleotide-binding, alpha-beta plait|RNA recognition motif domain, eukaryote|Polyadenylate binding protein, human types 1, 2, 3, 4	GO:0003676|GO:0003723|GO:0000166	NULL	NULL
Dr00964	NULL	NULL	NULL	NULL	NULL	NULL	NULL	NULL
Dr01004	GO:0012505|GO:0005886	NULL	plant synaptotagmin	IPR000008|IPR001245|IPR011009|IPR002290|IPR000719|IPR017441|IPR008271	C2 domain|Serine-threonine/tyrosine-protein kinase catalytic domain|Protein kinase-like domain|Serine/threonine- / dual specificity protein kinase, catalytic domain|Protein kinase domain|Protein kinase, ATP binding site|Serine/threonine-protein kinase, active site	GO:0005515|GO:0004672|GO:0006468|GO:0016772|GO:0005524|GO:0004674	NULL	NULL
Dr00988	GO:0008152|GO:0016491	NULL	aldehyde dehydrogenase family 7 member a1	IPR015590|IPR016161|IPR016163|IPR016162|IPR016160	Aldehyde dehydrogenase domain|Aldehyde/histidinol dehydrogenase|Aldehyde dehydrogenase, C-terminal|Aldehyde dehydrogenase, N-terminal|Aldehyde dehydrogenase, conserved site	GO:0008152|GO:0016491|GO:0055114|GO:0016620	NULL	NULL
Dr00989	GO:0044765|GO:0044763|GO:0016020	NULL	probable mitochondrial 2-oxoglutarate malate carrier	IPR018108|IPR023395	Mitochondrial substrate/solute carrier|Mitochondrial carrier domain	NULL	NULL	NULL
Dr23302	GO:0008137|GO:0005747|GO:0016021|GO:0006120|GO:0006744|GO:0006814|GO:0015992	EC:1.6.5.3	nadh dehydrogenase subunit 5	IPR001750	NADH:ubiquinone/plastoquinone oxidoreductase	GO:0008137|GO:0055114	NULL	Reactome: REACT_6305
Dr23305	NULL	NULL	NULL	NULL	NULL	NULL	NULL	NULL
Dr23304	GO:0005840|GO:0003735|GO:0006412|GO:0005739|GO:0042254	NULL	small subunit ribosomal protein	IPR001971	Ribosomal protein S11	GO:0003735|GO:0005840|GO:0006412	NULL	NULL
Dr09552	NULL	NULL	NULL	IPR011992|IPR002048|IPR018247	EF-hand domain pair|EF-hand domain|EF-Hand 1, calcium-binding site	GO:0005509	NULL	NULL
Dr09553	NULL	NULL	NULL	NULL	NULL	NULL	NULL	NULL
Dr23426	GO:0005507|GO:0004129|GO:0005751|GO:0016021|GO:0032940|GO:0016023|GO:0009060|GO:0009507|GO:0006123|GO:0015992	EC:1.9.3.1	cytochrome c oxidase subunit 2	IPR002429|IPR008972	Cytochrome c oxidase subunit II C-terminal|Cupredoxin	GO:0004129|GO:0005507|GO:0016020	NULL	NULL
Dr23427	GO:0044444|GO:0043229|GO:0030529	NULL	ribosomal protein s3	NULL	NULL	NULL	NULL	NULL
Dr09582	NULL	NULL	NULL	IPR027417	P-loop containing nucleoside triphosphate hydrolase	NULL	NULL	NULL
Dr09586	GO:0005739	NULL	uncharacterized protein	IPR025422	Transcription factor TGA like domain	GO:0006351|GO:0043565	NULL	NULL
Dr09611	GO:0016740	NULL	probable glycosyltransferase at5g03795-like	IPR004263	Exostosin-like	NULL	NULL	NULL
Dr09615	NULL	NULL	NULL	NULL	NULL	NULL	NULL	NULL
Dr09601	NULL	NULL	NULL	NULL	NULL	NULL	NULL	NULL
Dr09612	NULL	NULL	NULL	NULL	NULL	NULL	NULL	NULL
Dr09613	NULL	NULL	NULL	NULL	NULL	NULL	NULL	NULL
Dr23446	NULL	NULL	NULL	NULL	NULL	NULL	NULL	NULL
Dr23447	GO:0043231|GO:0044444	NULL	disease resistance protein rps5-like	IPR002182|IPR027417|IPR000767	NB-ARC|Disease resistance protein|P-loop containing nucleoside triphosphate hydrolase	GO:0043531|GO:0006952	NULL	NULL
Dr23460	NULL	NULL	NULL	NULL	NULL	NULL	NULL	NULL
Dr23463	NULL	NULL	NULL	IPR001611|IPR013210|IPR025875|IPR003591	Leucine-rich repeat|Leucine-rich repeat-containing N-terminal, type 2|Leucine rich repeat 4|Leucine-rich repeat, typical subtype	GO:0005515	NULL	NULL
Dr09678	GO:0016020	NULL	sulfite exporter family protein	IPR002781	Transmembrane protein TauE like	GO:0016021	NULL	NULL
Dr09649	GO:0044464	NULL	xyloglucan-specific endoglucanase inhibitor protein	IPR001461|IPR021109	Aspartic peptidase|Aspartic peptidase domain	GO:0004190|GO:0006508	NULL	NULL
Dr09652	NULL	NULL	NULL	IPR001461|IPR021109	Aspartic peptidase|Aspartic peptidase domain	GO:0004190|GO:0006508	NULL	NULL
Dr09654	GO:0071944	NULL	basic 7s globulin 2 precursor small	IPR001461|IPR021109	Aspartic peptidase|Aspartic peptidase domain	GO:0004190|GO:0006508	NULL	NULL
Dr09656	NULL	NULL	NULL	IPR003719	Phenazine biosynthesis PhzF protein	GO:0003824|GO:0009058	EC:5.1.-.-	KEGG: 00520+5.1.-.-|KEGG: 00960+5.1.-.-
Dr09673	NULL	NULL	NULL	IPR000719|IPR002902|IPR011009|IPR013320|IPR002290|IPR017441|IPR008271	Protein kinase domain|Gnk2-homologous domain|Protein kinase-like domain|Concanavalin A-like lectin/glucanase, subgroup|Serine/threonine- / dual specificity protein kinase, catalytic domain|Protein kinase, ATP binding site|Serine/threonine-protein kinase, active site	GO:0004672|GO:0005524|GO:0006468|GO:0016772|GO:0004674	NULL	NULL
Dr09675	GO:0009987|GO:0050896|GO:0016301|GO:0044464	NULL	cysteine-rich receptor-like protein kinase 10-like	IPR000719|IPR002902|IPR011009|IPR013320|IPR002290|IPR008271	Protein kinase domain|Gnk2-homologous domain|Protein kinase-like domain|Concanavalin A-like lectin/glucanase, subgroup|Serine/threonine- / dual specificity protein kinase, catalytic domain|Serine/threonine-protein kinase, active site	GO:0004672|GO:0005524|GO:0006468|GO:0016772|GO:0004674	NULL	NULL
Dr09724	NULL	NULL	NULL	IPR003480|IPR023213	Transferase|Chloramphenicol acetyltransferase-like domain	GO:0016747	NULL	NULL
Dr09784	NULL	NULL	NULL	IPR001611|IPR013210|IPR003591	Leucine-rich repeat|Leucine-rich repeat-containing N-terminal, type 2|Leucine-rich repeat, typical subtype	GO:0005515	NULL	NULL
Dr09728	GO:0043565|GO:0005634|GO:0046982|GO:0006355	NULL	protein	IPR003957|IPR003958|IPR009072|IPR003956	Transcription factor, NFYB/HAP3 subunit|Transcription factor CBF/NF-Y/archaeal histone|Histone-fold|Transcription factor, NFYB/HAP3, conserved site	GO:0003677|GO:0005622|GO:0043565|GO:0046982|GO:0005634|GO:0006355	NULL	NULL
Dr09778	GO:0009507	NULL	dihydrolipoamide s-acetyltransferase	IPR023213	Chloramphenicol acetyltransferase-like domain	NULL	NULL	NULL
Dr09786	GO:0044763|GO:0034645|GO:0016021|GO:0000139|GO:0016023|GO:0016740|GO:0016051|GO:0016043	NULL	xyloglucan galactosyltransferase katamari1-like	IPR004263	Exostosin-like	NULL	NULL	NULL
Dr09789	NULL	NULL	NULL	NULL	NULL	NULL	NULL	NULL
Dr09801	GO:0016020|GO:0005337|GO:0015858	NULL	equilibrative nucleoside transporter 4-like	IPR002259	Equilibrative nucleoside transporter	GO:0005337|GO:0006810|GO:0016021	NULL	Reactome: REACT_15518|Reactome: REACT_1698
Dr09856	GO:0050896|GO:0034480|GO:0044444|GO:0006796|GO:0044255|GO:0016020	EC:3.1.4.3	phospholipase c 4	IPR007312	Phosphoesterase	GO:0016788	NULL	NULL
Dr09808	NULL	NULL	NULL	IPR003323	Ovarian tumour, otubain	NULL	NULL	NULL
Dr09846	GO:0004849|GO:0044211|GO:0016773|GO:0005524|GO:0044206|GO:0016310|GO:0016757|GO:0006206	EC:2.7.1.48|EC:2.7.1.0	uracil phosphoribosyltransferase	IPR026008	Uridine kinase-like protein	NULL	EC:2.7.1.48	KEGG: 00240+2.7.1.48|KEGG: 00983+2.7.1.48|MetaCyc: PWY-7193|UniPathway: UPA00574|UniPathway: UPA00579
Dr09816	GO:0009739|GO:0005739|GO:0006355|GO:0034432|GO:0003677|GO:0003700|GO:0010030|GO:0005667|GO:0045449	NULL	nudix hydrolase 13	IPR000086|IPR015797|IPR020084	NUDIX hydrolase domain|NUDIX hydrolase domain-like|NUDIX hydrolase, conserved site	GO:0016787	NULL	NULL
Dr09819	GO:0006857|GO:0016021|GO:0005215	NULL	peptide transporter-like protein	IPR000109|IPR016196|IPR018456	Proton-dependent oligopeptide transporter family|Major facilitator superfamily domain, general substrate transporter|PTR2 family proton/oligopeptide symporter, conserved site	GO:0005215|GO:0006810|GO:0016020|GO:0006857	NULL	Reactome: REACT_15518|Reactome: REACT_19419
Dr09996	NULL	NULL	NULL	NULL	NULL	NULL	NULL	NULL
Dr23562	NULL	NULL	NULL	NULL	NULL	NULL	NULL	NULL
Dr23581	NULL	NULL	NULL	IPR004252	Probable transposase, Ptta/En/Spm, plant	NULL	NULL	NULL
Dr23588	GO:0003899|GO:0006351|GO:0003677|GO:0032549|GO:0009507|GO:0005730|GO:0006144|GO:0006206	EC:2.7.7.6	rna polymerase beta subunit	IPR015712|IPR007645	DNA-directed RNA polymerase, subunit 2|RNA polymerase Rpb2, domain 3	GO:0003899|GO:0006351|GO:0032549|GO:0003677	EC:2.7.7.6	KEGG: 00230+2.7.7.6|KEGG: 00240+2.7.7.6|Reactome: REACT_1788
Dr10086	NULL	NULL	NULL	NULL	NULL	NULL	NULL	NULL
Dr10113	NULL	NULL	NULL	IPR001480	Bulb-type lectin domain	NULL	NULL	NULL
Dr10193	GO:0042802|GO:0004252|GO:0016023|GO:0005618|GO:0006508|GO:0043086	EC:3.4.21.0	subtilisin-like serine protease	IPR015500|IPR000209|IPR023828	Peptidase S8, subtilisin-related|Peptidase S8/S53 domain|Peptidase S8, subtilisin, Ser-active site	GO:0004252|GO:0006508	NULL	NULL
Dr10203	GO:0004713|GO:0006468|GO:0005524|GO:0004674|GO:0009069	EC:2.7.10.0|EC:2.7.11.0	leucine rich repeat family expressed	NULL	NULL	NULL	NULL	NULL
Dr10127	GO:0005886	NULL	integral membrane single c2 domain protein	IPR000008	C2 domain	GO:0005515	NULL	NULL
Dr10244	NULL	NULL	NULL	IPR001680|IPR017986|IPR015943|IPR019775	WD40 repeat|WD40-repeat-containing domain|WD40/YVTN repeat-like-containing domain|WD40 repeat, conserved site	GO:0005515	NULL	NULL
Dr10181	GO:0047364	EC:2.8.2.24	protein	IPR000863|IPR027417	Sulfotransferase domain|P-loop containing nucleoside triphosphate hydrolase	GO:0008146	NULL	NULL
Dr10143	NULL	NULL	NULL	NULL	NULL	NULL	NULL	NULL
Dr10144	GO:0009536	NULL	gtpase-activating protein gyp7-like	IPR000195	Rab-GTPase-TBC domain	GO:0005097|GO:0032313	NULL	NULL
Dr10165	NULL	NULL	NULL	IPR006501	Pectinesterase inhibitor domain	GO:0004857|GO:0030599	EC:3.1.1.11	KEGG: 00040+3.1.1.11|KEGG: 00500+3.1.1.11|MetaCyc: PWY-1081|MetaCyc: PWY-7243|MetaCyc: PWY-7246|MetaCyc: PWY-7248|UniPathway: UPA00545
Dr10178	NULL	NULL	NULL	NULL	NULL	NULL	NULL	NULL
Dr23591	GO:0004806|GO:0009507|GO:0050253|GO:0047714|GO:0008970|GO:0046486|GO:0042572|GO:0009395	EC:3.1.1.3|EC:3.1.1.21|EC:3.1.1.26|EC:3.1.1.32	phospholipase a1- chloroplastic-like	IPR002921	Lipase, class 3	GO:0004806|GO:0006629	NULL	Reactome: REACT_14797|Reactome: REACT_604
Dr23621	NULL	NULL	NULL	NULL	NULL	NULL	NULL	NULL
Dr10254	NULL	NULL	NULL	IPR003035	RWP-RK domain	NULL	NULL	NULL
Dr10265	NULL	NULL	NULL	NULL	NULL	NULL	NULL	NULL
Dr23631	GO:0042545|GO:0005618|GO:0030599|GO:0045330|GO:0004857|GO:0043086|GO:0045490|GO:0005982|GO:0005985	EC:3.1.1.11	pectinesterase	IPR000070|IPR011050|IPR012334	Pectinesterase, catalytic|Pectin lyase fold/virulence factor|Pectin lyase fold	GO:0005618|GO:0030599|GO:0042545	EC:3.1.1.11	KEGG: 00040+3.1.1.11|KEGG: 00500+3.1.1.11|MetaCyc: PWY-1081|MetaCyc: PWY-7243|MetaCyc: PWY-7246|MetaCyc: PWY-7248|UniPathway: UPA00545
Dr23632	NULL	NULL	NULL	NULL	NULL	NULL	NULL	NULL
Dr23633	NULL	NULL	NULL	NULL	NULL	NULL	NULL	NULL
Dr23634	NULL	NULL	NULL	IPR002784	Ribosomal protein L14	GO:0003735|GO:0005622|GO:0005840|GO:0006412	NULL	NULL
Dr23670	NULL	NULL	NULL	NULL	NULL	NULL	NULL	NULL
Dr10278	NULL	NULL	NULL	NULL	NULL	NULL	NULL	NULL
Dr10279	NULL	NULL	NULL	NULL	NULL	NULL	NULL	NULL
Dr10298	GO:0006810|GO:0043231|GO:0044444|GO:0016020|GO:0044446	NULL	adenosine nucleotide translocator	IPR018108|IPR023395|IPR002067	Mitochondrial substrate/solute carrier|Mitochondrial carrier protein|Mitochondrial carrier domain	GO:0055085	NULL	NULL
Dr10297	GO:0004672|GO:0016023|GO:0000166|GO:0016310	NULL	protein	IPR001480	Bulb-type lectin domain	NULL	NULL	NULL
Dr10269	NULL	NULL	NULL	NULL	NULL	NULL	NULL	NULL
Dr10299	GO:0050896	NULL	thaumatin-like protein	IPR001938	Thaumatin	NULL	NULL	NULL
Dr10321	NULL	NULL	NULL	IPR004252	Probable transposase, Ptta/En/Spm, plant	NULL	NULL	NULL
Dr23700	NULL	NULL	NULL	NULL	NULL	NULL	NULL	NULL
Dr10327	GO:0071704|GO:0044238|GO:0009628|GO:0071944|GO:0005515|GO:0043167|GO:0044237|GO:0006950|GO:0016020	NULL	#NAME?	IPR008971|IPR001305	HSP40/DnaJ peptide-binding|Heat shock protein DnaJ, cysteine-rich domain	GO:0006457|GO:0051082|GO:0031072	NULL	NULL
Dr10323	GO:0047918|GO:0019853|GO:0050662|GO:0000166	EC:5.1.3.18	gdp-d-mannose 3 -epimerase	IPR001509|IPR016040	NAD-dependent epimerase/dehydratase|NAD(P)-binding domain	GO:0003824|GO:0044237|GO:0050662	NULL	NULL
Dr10326	GO:0047918|GO:0019853|GO:0050662|GO:0000166	EC:5.1.3.18	gdp-mannose 3 -epimerase	IPR001509|IPR016040	NAD-dependent epimerase/dehydratase|NAD(P)-binding domain	GO:0003824|GO:0044237|GO:0050662	NULL	NULL
Dr10328	NULL	NULL	NULL	IPR006458	Ovate protein family, C-terminal	NULL	NULL	NULL
Dr10330	GO:0016874|GO:0016301|GO:0016310|GO:0016567|GO:0008270|GO:0005739	NULL	ankyrin repeat-rich protein	IPR020683	Ankyrin repeat-containing domain	NULL	NULL	NULL
Dr10337	NULL	NULL	NULL	IPR008479	Protein of unknown function DUF760	NULL	NULL	NULL
Dr23726	NULL	NULL	NULL	IPR013210	Leucine-rich repeat-containing N-terminal, type 2	NULL	NULL	NULL
Dr23739	GO:0016740|GO:0008152	NULL	vacuolar protein sorting-associated	IPR026847	Vacuolar protein sorting-associated protein 13	NULL	NULL	NULL
Dr10353	NULL	NULL	NULL	NULL	NULL	NULL	NULL	NULL
Dr10385	NULL	NULL	NULL	NULL	NULL	NULL	NULL	NULL
Dr23763	GO:0016746|GO:0008610|GO:0005739	NULL	3-ketoacyl- synthase	IPR013601|IPR013747|IPR016039|IPR016038	FAE1/Type III polyketide synthase-like protein|3-Oxoacyl-[acyl-carrier-protein (ACP)] synthase III C-terminal|Thiolase-like|Thiolase-like, subgroup	GO:0006633|GO:0016020|GO:0016747|GO:0008610|GO:0003824|GO:0008152	EC:2.3.1.199|EC:2.3.1.180	KEGG: 00062+2.3.1.199|MetaCyc: PWY-5080|MetaCyc: PWY-6433|MetaCyc: PWY-7036|UniPathway: UPA00094|KEGG: 00061+2.3.1.180|MetaCyc: PWY-4381|MetaCyc: PWY-6519|UniPathway: UPA00094
Dr10410	NULL	NULL	NULL	NULL	NULL	NULL	NULL	NULL
Dr10442	NULL	NULL	NULL	NULL	NULL	NULL	NULL	NULL
Dr10444	GO:0008171|GO:0046983|GO:0032259	NULL	caffeic acid 3-o-methyltransferase	IPR001077|IPR012967|IPR011991	O-methyltransferase, family 2|Plant methyltransferase dimerisation|Winged helix-turn-helix DNA-binding domain	GO:0008171|GO:0046983	NULL	NULL
Dr10415	NULL	NULL	NULL	NULL	NULL	NULL	NULL	NULL
Dr10450	NULL	NULL	NULL	IPR019009|IPR027417	Signal recognition particle receptor, beta subunit|P-loop containing nucleoside triphosphate hydrolase	NULL	NULL	NULL
Dr10458	GO:0043231|GO:0044444	NULL	at1g03560-like protein	IPR002885	Pentatricopeptide repeat	NULL	NULL	NULL
Dr10497	GO:0005739	NULL	protein	IPR023186|IPR001910	Inosine/uridine-preferring nucleoside hydrolase|Inosine/uridine-preferring nucleoside hydrolase domain	NULL	NULL	NULL
Dr10479	GO:0022900|GO:0045454|GO:0048444|GO:0009055|GO:0048441|GO:0016023|GO:0048443|GO:0015035|GO:0006118	NULL	glutaredoxin family protein	IPR002109|IPR012336	Glutaredoxin|Thioredoxin-like fold	GO:0009055|GO:0015035|GO:0045454	NULL	NULL
Dr10481	GO:0022900|GO:0045454|GO:0048444|GO:0009055|GO:0048441|GO:0016023|GO:0016740|GO:0048443|GO:0015035|GO:0006118	NULL	glutaredoxin-like protein	IPR001878|IPR002109|IPR012336	Zinc finger, CCHC-type|Glutaredoxin|Thioredoxin-like fold	GO:0003676|GO:0008270|GO:0009055|GO:0015035|GO:0045454	NULL	NULL
Dr10502	GO:0016740	NULL	bahd family clade v	IPR003480|IPR023213	Transferase|Chloramphenicol acetyltransferase-like domain	GO:0016747	NULL	NULL
Dr01032	GO:0016020|GO:0004812|GO:0004571|GO:0005739|GO:0005509|GO:0006418|GO:0005975	EC:3.2.1.113	probable alpha-mannosidase i mns4-like	IPR001382	Glycoside hydrolase, family 47	GO:0004571|GO:0005509|GO:0016020	NULL	NULL
Dr01046	GO:0050896	NULL	e3 ubiquitin-protein ligase bah1	NULL	NULL	NULL	NULL	NULL
Dr01023	GO:0009987|GO:0005739|GO:0016301	NULL	cbl-interacting serine threonine-protein kinase 7	IPR000719|IPR004041|IPR011009|IPR002290|IPR018451|IPR017441|IPR008271	Protein kinase domain|NAF domain|Protein kinase-like domain|Serine/threonine- / dual specificity protein kinase, catalytic domain|NAF/FISL domain|Protein kinase, ATP binding site|Serine/threonine-protein kinase, active site	GO:0004672|GO:0005524|GO:0006468|GO:0007165|GO:0016772|GO:0004674	NULL	NULL
Dr01028	GO:0006120|GO:0005488|GO:0008137|GO:0005747|GO:0006744|GO:0006814|GO:0015992	EC:1.6.5.3	protein	IPR002023|IPR012336	NADH-quinone oxidoreductase subunit E like|Thioredoxin-like fold	GO:0016491|GO:0055114	NULL	NULL
Dr01042	NULL	NULL	NULL	NULL	NULL	NULL	NULL	NULL
Dr01334	GO:0009987|GO:0016301	NULL	serine-threonine protein plant-	IPR000719|IPR001480|IPR011009|IPR013320|IPR003609|IPR017441	Protein kinase domain|Bulb-type lectin domain|Protein kinase-like domain|Concanavalin A-like lectin/glucanase, subgroup|Apple-like|Protein kinase, ATP binding site	GO:0004672|GO:0005524|GO:0006468|GO:0016772	NULL	NULL
Dr01330	GO:0009987|GO:0016772	NULL	g-type lectin s-receptor-like serine threonine-protein kinase sd2-5-like	IPR000719|IPR001245|IPR011009|IPR013320|IPR002290|IPR017441|IPR008271	Protein kinase domain|Serine-threonine/tyrosine-protein kinase catalytic domain|Protein kinase-like domain|Concanavalin A-like lectin/glucanase, subgroup|Serine/threonine- / dual specificity protein kinase, catalytic domain|Protein kinase, ATP binding site|Serine/threonine-protein kinase, active site	GO:0004672|GO:0005524|GO:0006468|GO:0016772|GO:0004674	NULL	NULL
Dr01331	GO:0009987|GO:0016772	NULL	g-type lectin s-receptor-like serine threonine-protein kinase sd2-5-like	IPR000719|IPR001480|IPR013227|IPR011009|IPR013320|IPR002290|IPR017441|IPR008271	Protein kinase domain|Bulb-type lectin domain|PAN-2 domain|Protein kinase-like domain|Concanavalin A-like lectin/glucanase, subgroup|Serine/threonine- / dual specificity protein kinase, catalytic domain|Protein kinase, ATP binding site|Serine/threonine-protein kinase, active site	GO:0004672|GO:0005524|GO:0006468|GO:0016772|GO:0004674	NULL	NULL
Dr01333	GO:0009987|GO:0016772	NULL	serine-threonine protein plant-	IPR000719|IPR001480|IPR011009|IPR013320|IPR002290|IPR008271	Protein kinase domain|Bulb-type lectin domain|Protein kinase-like domain|Concanavalin A-like lectin/glucanase, subgroup|Serine/threonine- / dual specificity protein kinase, catalytic domain|Serine/threonine-protein kinase, active site	GO:0004672|GO:0005524|GO:0006468|GO:0016772|GO:0004674	NULL	NULL
Dr01343	NULL	NULL	NULL	NULL	NULL	NULL	NULL	NULL
Dr01345	NULL	NULL	NULL	NULL	NULL	NULL	NULL	NULL
Dr01393	GO:0005488|GO:0016023	NULL	early nodulin-like protein 7	IPR003245|IPR008972	Plastocyanin-like|Cupredoxin	GO:0005507|GO:0009055	NULL	NULL
Dr01394	GO:0046872	NULL	metallothionein-like protein	NULL	NULL	NULL	NULL	NULL
Dr01408	NULL	NULL	NULL	NULL	NULL	NULL	NULL	NULL
Dr01517	NULL	NULL	NULL	IPR006458	Ovate protein family, C-terminal	NULL	NULL	NULL
Dr01519	NULL	NULL	NULL	IPR006458	Ovate protein family, C-terminal	NULL	NULL	NULL
Dr01533	GO:0035251|GO:0005739	NULL	anthocyanin 5-o-glucosyltransferase	IPR002213|IPR002048	UDP-glucuronosyl/UDP-glucosyltransferase|EF-hand domain	GO:0008152|GO:0016758|GO:0005509	NULL	NULL
Dr01536	GO:0035251	NULL	protein	IPR002213	UDP-glucuronosyl/UDP-glucosyltransferase	GO:0008152|GO:0016758	NULL	NULL
Dr01454	GO:0071704|GO:0044699|GO:0016023|GO:0044281|GO:0009987|GO:0016614|GO:0055114	NULL	protein hothead-like	IPR000172|IPR007867|IPR012132	Glucose-methanol-choline oxidoreductase, N-terminal|Glucose-methanol-choline oxidoreductase, C-terminal|Glucose-methanol-choline oxidoreductase	GO:0016614|GO:0050660|GO:0055114|GO:0006066|GO:0008812	EC:1.1.99.1	KEGG: 00260+1.1.99.1|UniPathway: UPA00529
Dr01569	GO:0009987|GO:0004672|GO:0044464	NULL	protein kinase xa21 receptor type	IPR001611|IPR013210|IPR003591	Leucine-rich repeat|Leucine-rich repeat-containing N-terminal, type 2|Leucine-rich repeat, typical subtype	GO:0005515	NULL	NULL
Dr01488	NULL	NULL	NULL	IPR002022|IPR011050|IPR012334|IPR018082	Pectate lyase/Amb allergen|AmbAllergen|Pectin lyase fold/virulence factor|Pectin lyase fold	NULL	NULL	NULL
Dr01081	NULL	NULL	NULL	IPR000864	Proteinase inhibitor I13, potato inhibitor I	GO:0004867|GO:0009611	NULL	NULL
Dr01114	GO:0006979|GO:0009450|GO:0006540|GO:0008270|GO:0005739|GO:0050897|GO:0009865|GO:0010154|GO:0019484|GO:0034387|GO:0010183|GO:0046686|GO:0030170|GO:0010033|GO:0005886	NULL	uncharacterized aminotransferase y4ub-like	IPR005814|IPR015424|IPR015422	Aminotransferase class-III|Pyridoxal phosphate-dependent transferase|Pyridoxal phosphate-dependent transferase, major region, subdomain 2	GO:0008483|GO:0030170|GO:0003824	NULL	NULL
Dr01115	GO:0030170|GO:0008152|GO:0005739|GO:0008483	EC:2.6.1.0	erebp-4 like protein	IPR008580|IPR015424|IPR015421	PPPDE putative peptidase domain|Pyridoxal phosphate-dependent transferase|Pyridoxal phosphate-dependent transferase, major region, subdomain 1	GO:0003824|GO:0030170	EC:3.4.-.-	KEGG: 00310+3.4.-.-|KEGG: 00550+3.4.-.-|KEGG: 00780+3.4.-.-
Dr01122	GO:0035251	NULL	udp-glycosyltransferase 85a2-like	IPR002213	UDP-glucuronosyl/UDP-glucosyltransferase	GO:0008152|GO:0016758	NULL	NULL
Dr01108	GO:0006260|GO:0000166|GO:0044464	NULL	calcyclin-binding protein	IPR008978	HSP20-like chaperone	NULL	NULL	NULL
Dr01092	NULL	NULL	NULL	IPR011990	Tetratricopeptide-like helical	GO:0005515	NULL	NULL
Dr01096	NULL	NULL	NULL	IPR021832|IPR020683	Ankyrin repeat domain-containing protein 13|Ankyrin repeat-containing domain	NULL	NULL	NULL
Dr01155	NULL	NULL	NULL	IPR004252	Probable transposase, Ptta/En/Spm, plant	NULL	NULL	NULL
Dr01161	GO:0016740|GO:0044424	NULL	thymidylate kinase	NULL	NULL	NULL	NULL	NULL
Dr01164	GO:0050832|GO:0005576|GO:0031640	NULL	thaumatin-like protein	IPR001938|IPR017949	Thaumatin|Thaumatin, conserved site	NULL	NULL	NULL
Dr01172	NULL	NULL	NULL	NULL	NULL	NULL	NULL	NULL
Dr01177	GO:0003676	NULL	sap-like protein	NULL	NULL	NULL	NULL	NULL
Dr01157	NULL	NULL	NULL	NULL	NULL	NULL	NULL	NULL
Dr01135	GO:0015798|GO:0005886|GO:0055085|GO:0016021|GO:0005366|GO:0006812|GO:0008643	NULL	probable inositol transporter 2-like	IPR005828|IPR016196|IPR003663|IPR020846|IPR005829	General substrate transporter|Sugar/inositol transporter|Major facilitator superfamily domain, general substrate transporter|Major facilitator superfamily domain|Sugar transporter, conserved site	GO:0016021|GO:0022857|GO:0055085|GO:0016020|GO:0022891|GO:0005215|GO:0006810	NULL	Reactome: REACT_15518
Dr01190	NULL	NULL	NULL	NULL	NULL	NULL	NULL	NULL
Dr01205	NULL	NULL	NULL	NULL	NULL	NULL	NULL	NULL
Dr01169	GO:0009524|GO:0005886|GO:0006468|GO:0005524|GO:0005634|GO:0005829|GO:0004674|GO:0009069	EC:2.7.11.0	protein	IPR000719|IPR017892|IPR011009|IPR011993|IPR000961|IPR002290|IPR017441|IPR008271	Protein kinase domain|Protein kinase, C-terminal|Protein kinase-like domain|Pleckstrin homology-like domain|AGC-kinase, C-terminal|Serine/threonine- / dual specificity protein kinase, catalytic domain|Protein kinase, ATP binding site|Serine/threonine-protein kinase, active site	GO:0004672|GO:0005524|GO:0006468|GO:0004674|GO:0016772	NULL	NULL
Dr01197	NULL	NULL	NULL	NULL	NULL	NULL	NULL	NULL
Dr01198	NULL	NULL	NULL	IPR002885	Pentatricopeptide repeat	NULL	NULL	NULL
Dr01225	GO:0006777|GO:0016020|GO:0003824|GO:0009536	NULL	molybdopterin biosynthesis protein cnx3	IPR002820|IPR021039	Molybdopterin cofactor biosynthesis C (MoaC) domain|Iron-sulphur binding protein LdpA, C-terminal	GO:0006777	NULL	UniPathway: UPA00344
Dr01227	NULL	NULL	NULL	NULL	NULL	NULL	NULL	NULL
Dr01228	NULL	NULL	NULL	NULL	NULL	NULL	NULL	NULL
Dr01231	NULL	NULL	NULL	NULL	NULL	NULL	NULL	NULL
Dr01219	NULL	NULL	NULL	NULL	NULL	NULL	NULL	NULL
Dr01234	NULL	NULL	NULL	NULL	NULL	NULL	NULL	NULL
Dr01241	GO:0003700|GO:0003677|GO:0006355|GO:0005667|GO:0045449	NULL	dna binding	IPR001471|IPR013955|IPR012340|IPR016177	AP2/ERF domain|Replication factor A, C-terminal|Nucleic acid-binding, OB-fold|DNA-binding domain	GO:0003700|GO:0006355|GO:0003677	NULL	NULL
Dr01242	NULL	NULL	NULL	NULL	NULL	NULL	NULL	NULL
Dr01243	NULL	NULL	NULL	NULL	NULL	NULL	NULL	NULL
Dr01250	NULL	NULL	NULL	NULL	NULL	NULL	NULL	NULL
Dr01268	NULL	NULL	NULL	NULL	NULL	NULL	NULL	NULL
Dr01298	NULL	NULL	NULL	NULL	NULL	NULL	NULL	NULL
Dr01303	NULL	NULL	NULL	IPR004252	Probable transposase, Ptta/En/Spm, plant	NULL	NULL	NULL
Dr01265	NULL	NULL	NULL	IPR001611|IPR025875	Leucine-rich repeat|Leucine rich repeat 4	GO:0005515	NULL	NULL
Dr23824	NULL	NULL	NULL	NULL	NULL	NULL	NULL	NULL
Dr23865	GO:0050896|GO:0016772|GO:0043231|GO:0044763|GO:0044444	NULL	probable lrr receptor-like serine threonine-protein kinase at3g47570-like	IPR000719|IPR001611|IPR013210|IPR011009|IPR013320|IPR002290|IPR003591|IPR017441|IPR008271	Protein kinase domain|Leucine-rich repeat|Leucine-rich repeat-containing N-terminal, type 2|Protein kinase-like domain|Concanavalin A-like lectin/glucanase, subgroup|Serine/threonine- / dual specificity protein kinase, catalytic domain|Leucine-rich repeat, typical subtype|Protein kinase, ATP binding site|Serine/threonine-protein kinase, active site	GO:0004672|GO:0005524|GO:0006468|GO:0005515|GO:0016772|GO:0004674	NULL	NULL
Dr10549	GO:0016023|GO:0003824	NULL	heparanase-like protein 1-like	IPR005199|IPR017853	Glycoside hydrolase, family 79|Glycoside hydrolase, superfamily	GO:0016020|GO:0016798	NULL	NULL
Dr10603	NULL	NULL	NULL	IPR015880|IPR007087	Zinc finger, C2H2-like|Zinc finger, C2H2	GO:0046872	NULL	NULL
Dr10526	NULL	NULL	NULL	IPR001128	Cytochrome P450	GO:0005506|GO:0016705|GO:0020037|GO:0055114	NULL	Reactome: REACT_13433
Dr10527	GO:0016491|GO:0005488	NULL	flavonoid 3 -hydroxylase	IPR001128|IPR002401|IPR017972	Cytochrome P450|Cytochrome P450, E-class, group I|Cytochrome P450, conserved site	GO:0005506|GO:0016705|GO:0020037|GO:0055114	NULL	Reactome: REACT_13433
Dr10528	GO:0009411|GO:0020037|GO:0005506|GO:0009055|GO:0016711|GO:0055114|GO:0006118|GO:0009813	EC:1.14.13.21	flavonoid 3 -hydroxylase	IPR001128|IPR002401|IPR017972	Cytochrome P450|Cytochrome P450, E-class, group I|Cytochrome P450, conserved site	GO:0005506|GO:0016705|GO:0020037|GO:0055114	NULL	Reactome: REACT_13433
Dr10541	NULL	NULL	NULL	NULL	NULL	NULL	NULL	NULL
Dr10565	GO:0046872|GO:0016491	NULL	cytochrome p450-like protein	IPR001128|IPR002403	Cytochrome P450|Cytochrome P450, E-class, group IV	GO:0005506|GO:0016705|GO:0020037|GO:0055114|GO:0004497	NULL	Reactome: REACT_13433
Dr10571	GO:0050896|GO:0005488|GO:0044710|GO:0016491	NULL	cytochrome p450	IPR001128	Cytochrome P450	GO:0005506|GO:0016705|GO:0020037|GO:0055114	NULL	Reactome: REACT_13433
Dr10607	NULL	NULL	NULL	NULL	NULL	NULL	NULL	NULL
Dr10537	GO:0006412|GO:0005618|GO:0008270|GO:0003676|GO:0005730|GO:0003735|GO:0022627|GO:0005773|GO:0015074|GO:0016020|GO:0042254	NULL	40s ribosomal protein s19	IPR001266|IPR018277	Ribosomal protein S19e|Ribosomal protein S19e, conserved site	GO:0003735|GO:0005622|GO:0005840|GO:0006412	NULL	NULL
Dr10614	GO:0005488|GO:0016491|GO:0016023|GO:0006950	NULL	peroxidase	IPR002016|IPR010255|IPR000823|IPR019793	Haem peroxidase, plant/fungal/bacterial|Plant peroxidase|Haem peroxidase|Peroxidases heam-ligand binding site	GO:0004601|GO:0006979|GO:0020037|GO:0055114	EC:1.11.1.7	KEGG: 00360+1.11.1.7|KEGG: 00940+1.11.1.7|MetaCyc: PWY-5461|MetaCyc: PWY-7214
Dr10635	NULL	NULL	NULL	NULL	NULL	NULL	NULL	NULL
Dr10649	GO:0016020	NULL	protein	IPR004254	Hly-III-related	GO:0016021	NULL	NULL
Dr10702	NULL	NULL	NULL	NULL	NULL	NULL	NULL	NULL
Dr10706	NULL	NULL	NULL	IPR000008	C2 domain	GO:0005515	NULL	NULL
Dr10631	GO:0044765|GO:0016740	NULL	cyclic nucleotide gated channel	IPR000595|IPR001593|IPR018490|IPR014710|IPR003938|IPR000048|IPR018281|IPR027500	Cyclic nucleotide-binding domain|Ribosomal protein S3Ae|Potassium channel, voltage-dependent, EAG/ELK/ERG|Cyclic nucleotide-binding-like|RmlC-like jelly roll fold|IQ motif, EF-hand binding site|Ribosomal protein S3Ae, conserved site|40S ribosomal protein S1/3, eukaryotes	GO:0003735|GO:0005622|GO:0005840|GO:0006412|GO:0005249|GO:0006813|GO:0016020|GO:0005515	NULL	NULL
Dr10723	GO:0016036|GO:0006468|GO:0005524|GO:0004674|GO:0009069	EC:2.7.11.0	phosphoenolpyruvate carboxylase kinase	IPR000719|IPR011009|IPR008271	Protein kinase domain|Protein kinase-like domain|Serine/threonine-protein kinase, active site	GO:0004672|GO:0005524|GO:0006468|GO:0016772|GO:0004674	NULL	NULL
Dr10709	GO:0044765|GO:0031967|GO:0009507|GO:0016020|GO:0005739|GO:0071944	NULL	adenylate translocator	IPR018108|IPR023395|IPR002067	Mitochondrial substrate/solute carrier|Mitochondrial carrier protein|Mitochondrial carrier domain	GO:0055085	NULL	NULL
Dr10713	GO:0003677|GO:0005886|GO:0003743|GO:0009507|GO:0005840|GO:0006446	NULL	tetratricopeptide repeat -containing protein	IPR011990	Tetratricopeptide-like helical	GO:0005515	NULL	NULL
Dr10729	NULL	NULL	NULL	NULL	NULL	NULL	NULL	NULL
Dr10730	GO:0030308|GO:0010090|GO:0003677|GO:0032876|GO:0008361|GO:0003682|GO:0005634|GO:0000785	NULL	trihelix transcription factor gt-2-like	NULL	NULL	NULL	NULL	NULL
Dr10786	NULL	NULL	NULL	IPR022690|IPR022692|IPR001191|IPR001301	Geminivirus AL1 replication-associated protein, catalytic domain|Geminivirus AL1 replication-associated protein, central domain|Geminivirus AL1, replication-associated protein|Geminivirus AL1 replication-associated protein, CLV type	GO:0006260|GO:0016888|GO:0005198|GO:0019028	EC:2.7.7.-	KEGG: 00520+2.7.7.-
Dr10814	GO:0022900|GO:0010295|GO:0009414|GO:0010114|GO:0016021|GO:0046345|GO:0032940|GO:0009055|GO:0030912|GO:0009737|GO:0020037|GO:0048838|GO:0005789|GO:0050832|GO:0005506|GO:0006118	EC:1.14.13.93	abscisic acid 8 -hydroxylase	IPR001128|IPR002401|IPR017972	Cytochrome P450|Cytochrome P450, E-class, group I|Cytochrome P450, conserved site	GO:0005506|GO:0016705|GO:0020037|GO:0055114	NULL	Reactome: REACT_13433
Dr23906	GO:0050896|GO:0008426|GO:0044444|GO:0019904|GO:0005634|GO:0042313|GO:0045859	NULL	14-3-3 protein	IPR000308|IPR023410	14-3-3 protein|14-3-3 domain	GO:0019904	NULL	NULL
Dr23907	GO:0003824	NULL	geranylgeranyl pyrophosphate synthase-related protein	IPR017446|IPR000092|IPR008949	Polyprenyl synthetase-related|Polyprenyl synthetase|Terpenoid synthase	GO:0008299	NULL	NULL
Dr10863	GO:0031011	NULL	protein	IPR024867	Nuclear factor related to kappa-B-binding protein	GO:0031011	NULL	NULL
Dr10880	GO:0044444	NULL	uncharacterized protein loc100824671	NULL	NULL	NULL	NULL	NULL
Dr10914	GO:0016023	NULL	protein	IPR001117|IPR011706|IPR008972|IPR002355	Multicopper oxidase, type 1|Multicopper oxidase, type 2|Cupredoxin|Multicopper oxidase, copper-binding site	GO:0016491|GO:0055114|GO:0005507	NULL	NULL
Dr10835	GO:0005773|GO:0008324|GO:0006812|GO:0016020|GO:0010038	NULL	zinc ion transmembrane transporter	IPR002524|IPR027469	Cation efflux protein|Cation efflux protein transmembrane domain	GO:0006812|GO:0008324|GO:0016021|GO:0055085	NULL	NULL
Dr10922	GO:0009987|GO:0004672|GO:0008152|GO:0044464	NULL	l-type lectin-domain containing receptor kinase -like	IPR000719|IPR001220|IPR001245|IPR008985|IPR011009|IPR013320|IPR017441	Protein kinase domain|Legume lectin domain|Serine-threonine/tyrosine-protein kinase catalytic domain|Concanavalin A-like lectin/glucanases superfamily|Protein kinase-like domain|Concanavalin A-like lectin/glucanase, subgroup|Protein kinase, ATP binding site	GO:0004672|GO:0005524|GO:0006468|GO:0030246|GO:0016772	NULL	NULL
Dr10960	GO:0009628|GO:0016746|GO:0008610|GO:0005739	NULL	beta-ketoacyl-coa synthase family protein	IPR013601|IPR013747|IPR016039|IPR016038|IPR012392	FAE1/Type III polyketide synthase-like protein|3-Oxoacyl-[acyl-carrier-protein (ACP)] synthase III C-terminal|Thiolase-like|Thiolase-like, subgroup|Very-long-chain 3-ketoacyl-CoA synthase	GO:0006633|GO:0016020|GO:0016747|GO:0008610|GO:0003824|GO:0008152	EC:2.3.1.199|EC:2.3.1.180	KEGG: 00062+2.3.1.199|MetaCyc: PWY-5080|MetaCyc: PWY-6433|MetaCyc: PWY-7036|UniPathway: UPA00094|KEGG: 00061+2.3.1.180|MetaCyc: PWY-4381|MetaCyc: PWY-6519|UniPathway: UPA00094
Dr10980	GO:0048364|GO:0004672|GO:0009850|GO:0009741|GO:0000166|GO:0016310|GO:0009826|GO:0005634	NULL	casein kinase i isoform delta-like	IPR000719|IPR011009|IPR002290|IPR017441|IPR008271	Protein kinase domain|Protein kinase-like domain|Serine/threonine- / dual specificity protein kinase, catalytic domain|Protein kinase, ATP binding site|Serine/threonine-protein kinase, active site	GO:0004672|GO:0005524|GO:0006468|GO:0016772|GO:0004674	NULL	NULL
Dr10940	GO:0009725|GO:0043200|GO:0006857|GO:0015198|GO:0006950|GO:0014070|GO:0051707	NULL	peptide transporter ptr3-a	IPR000109|IPR016196	Proton-dependent oligopeptide transporter family|Major facilitator superfamily domain, general substrate transporter	GO:0005215|GO:0006810|GO:0016020	NULL	Reactome: REACT_15518|Reactome: REACT_19419
Dr10942	GO:0009725|GO:0043200|GO:0006857|GO:0015198|GO:0006950|GO:0014070|GO:0051707|GO:0016020	NULL	peptide transporter ptr3-a-like	IPR000109|IPR016196	Proton-dependent oligopeptide transporter family|Major facilitator superfamily domain, general substrate transporter	GO:0005215|GO:0006810|GO:0016020	NULL	Reactome: REACT_15518|Reactome: REACT_19419
Dr10947	GO:0006468|GO:0004674|GO:0000166|GO:0009069	EC:2.7.11.0	protein	IPR000719|IPR013210|IPR011009|IPR013320|IPR017441	Protein kinase domain|Leucine-rich repeat-containing N-terminal, type 2|Protein kinase-like domain|Concanavalin A-like lectin/glucanase, subgroup|Protein kinase, ATP binding site	GO:0004672|GO:0005524|GO:0006468|GO:0016772	NULL	NULL
Dr10948	GO:0006468|GO:0004674|GO:0000166|GO:0009069	EC:2.7.11.0	protein	IPR001245|IPR011009	Serine-threonine/tyrosine-protein kinase catalytic domain|Protein kinase-like domain	GO:0004672|GO:0006468|GO:0016772	NULL	NULL
Dr10949	GO:0009987|GO:0016301|GO:0008152	NULL	probable lrr receptor-like serine threonine-protein kinase at4g08850-like	IPR000719|IPR001611|IPR013210|IPR011009|IPR013320|IPR003591|IPR017441|IPR008266	Protein kinase domain|Leucine-rich repeat|Leucine-rich repeat-containing N-terminal, type 2|Protein kinase-like domain|Concanavalin A-like lectin/glucanase, subgroup|Leucine-rich repeat, typical subtype|Protein kinase, ATP binding site|Tyrosine-protein kinase, active site	GO:0004672|GO:0005524|GO:0006468|GO:0005515|GO:0016772|GO:0004713	NULL	NULL
Dr10972	GO:0016787	NULL	subtilisin-like protease sdd1-like	IPR015500|IPR000209	Peptidase S8, subtilisin-related|Peptidase S8/S53 domain	GO:0004252|GO:0006508	NULL	NULL
Dr23933	GO:0016740	NULL	orcinol o-methyltransferase	IPR001077	O-methyltransferase, family 2	GO:0008171	NULL	NULL
Dr23940	NULL	NULL	NULL	IPR022690|IPR022692|IPR001191|IPR001301	Geminivirus AL1 replication-associated protein, catalytic domain|Geminivirus AL1 replication-associated protein, central domain|Geminivirus AL1, replication-associated protein|Geminivirus AL1 replication-associated protein, CLV type	GO:0006260|GO:0016888|GO:0005198|GO:0019028	EC:2.7.7.-	KEGG: 00520+2.7.7.-
Dr11010	GO:0016301|GO:0044464	NULL	probable lrr receptor-like serine threonine-protein kinase at4g08850-like	IPR000719|IPR011009|IPR008271	Protein kinase domain|Protein kinase-like domain|Serine/threonine-protein kinase, active site	GO:0004672|GO:0005524|GO:0006468|GO:0016772|GO:0004674	NULL	NULL
Dr11025	NULL	NULL	NULL	IPR001471|IPR016177	AP2/ERF domain|DNA-binding domain	GO:0003700|GO:0006355|GO:0003677	NULL	NULL
Dr11029	NULL	NULL	NULL	NULL	NULL	NULL	NULL	NULL
Dr23952	GO:0050794	NULL	two-component response regulator arr12-like	IPR009057|IPR006447	Homeodomain-like|Myb domain, plants	GO:0003677	NULL	NULL
Dr23957	NULL	NULL	NULL	NULL	NULL	NULL	NULL	NULL
Dr23959	NULL	NULL	NULL	IPR001932	Protein phosphatase 2C (PP2C)-like domain	GO:0003824	NULL	NULL
Dr11038	GO:0003735|GO:0015935|GO:0016779|GO:0006412|GO:0005739|GO:0042254	EC:2.7.7.0	ribosomal protein s2	IPR001865|IPR023591	Ribosomal protein S2|Ribosomal protein S2, flavodoxin-like domain	GO:0003735|GO:0005622|GO:0005840|GO:0006412	NULL	NULL
Dr11033	GO:0005840|GO:0003735|GO:0006412|GO:0019843|GO:0005739|GO:0042254	NULL	ribosomal protein l16	IPR000114|IPR001351|IPR016180|IPR018280|IPR020798	Ribosomal protein L16|Ribosomal protein S3, C-terminal|Ribosomal protein L10e/L16|Ribosomal protein S3, conserved site|Ribosomal protein L16, conserved site	GO:0003735|GO:0006412|GO:0019843|GO:0005840|GO:0003723|GO:0005622	NULL	NULL
Dr11040	GO:0005840|GO:0003735|GO:0006412|GO:0005739|GO:0042254	NULL	ribosomal protein l2	IPR002171|IPR022666|IPR001351|IPR016180|IPR022669|IPR008991|IPR012340|IPR014722|IPR023575|IPR000114|IPR020798	Ribosomal protein L2|Ribosomal Proteins L2, RNA binding domain|Ribosomal protein S3, C-terminal|Ribosomal protein L10e/L16|Ribosomal protein L2, C-terminal|Ribosomal protein L16|Translation protein SH3-like domain|Nucleic acid-binding, OB-fold|Ribosomal protein L2 domain 2|Ribosomal protein S19, superfamily|Ribosomal protein L16, conserved site	GO:0003735|GO:0005622|GO:0005840|GO:0006412|GO:0019843	NULL	NULL
Dr11042	NULL	NULL	NULL	NULL	NULL	NULL	NULL	NULL
Dr11062	GO:0016023|GO:0015929|GO:0005975	NULL	beta-hexosaminidase precursor	IPR015883|IPR017853|IPR013781|IPR025705	Glycoside hydrolase family 20, catalytic core|Beta-hexosaminidase subunit alpha/beta|Glycoside hydrolase, superfamily|Glycoside hydrolase, catalytic domain	GO:0004553|GO:0005975|GO:0003824|GO:0004563	EC:3.2.1.52	KEGG: 00511+3.2.1.52|KEGG: 00513+3.2.1.52|KEGG: 00520+3.2.1.52|KEGG: 00531+3.2.1.52|KEGG: 00603+3.2.1.52|KEGG: 00604+3.2.1.52|MetaCyc: PWY-6573|MetaCyc: PWY-6576|MetaCyc: PWY-6902
Dr11142	NULL	NULL	NULL	NULL	NULL	NULL	NULL	NULL
Dr11153	NULL	NULL	NULL	NULL	NULL	NULL	NULL	NULL
Dr11184	NULL	NULL	NULL	IPR006927	Protein of unknown function DUF639	NULL	NULL	NULL
Dr11187	GO:0047800|GO:0055114|GO:0019530	EC:1.13.11.19	2-aminoethanethiol dioxygenase-like	IPR012864|IPR011051|IPR014710	Cysteamine dioxygenase|RmlC-like cupin domain|RmlC-like jelly roll fold	GO:0047800|GO:0055114	EC:1.13.11.19	KEGG: 00430+1.13.11.19
Dr11202	GO:0004316|GO:0000166|GO:0055114|GO:0005835|GO:0006633|GO:0042967	EC:1.1.1.100	short-chain type	IPR002198|IPR016040|IPR002347|IPR020904	Short-chain dehydrogenase/reductase SDR|Glucose/ribitol dehydrogenase|NAD(P)-binding domain|Short-chain dehydrogenase/reductase, conserved site	GO:0008152|GO:0016491	NULL	NULL
Dr11164	NULL	NULL	NULL	IPR008906|IPR025525|IPR012337	HAT dimerisation domain, C-terminal|Domain of unknown function DUF4413|Ribonuclease H-like domain	GO:0046983|GO:0003676	NULL	NULL
Dr11180	GO:0005829|GO:0005507|GO:0009086|GO:0008705|GO:0008270|GO:0005777|GO:0009651|GO:0009941|GO:0003871|GO:0032259|GO:0009570|GO:0010043|GO:0046686|GO:0005886|GO:0048046	EC:2.1.1.13|EC:2.1.1.14	vitamin-b12 independent methionine 5-methyltetrahydropteroyltriglutamate-homocysteine	IPR002629|IPR010729|IPR013215|IPR006276	Methionine synthase, vitamin-B12 independent|Ribosomal protein L47, mitochondrial|Cobalamin (vitamin B12)-independent methionine synthase MetE, N-terminal|Cobalamin-independent methionine synthase	GO:0003871|GO:0009086|GO:0003735|GO:0005761|GO:0006412|GO:0008270|GO:0008652	EC:2.1.1.14	KEGG: 00270+2.1.1.14|KEGG: 00450+2.1.1.14|MetaCyc: PWY-5041|MetaCyc: PWY-6151|MetaCyc: PWY-6936|MetaCyc: PWY-702|UniPathway: UPA00051
Dr11182	NULL	NULL	NULL	IPR004330|IPR007527	FAR1 DNA binding domain|Zinc finger, SWIM-type	GO:0008270	NULL	NULL
Dr24030	GO:0009507	NULL	metallocarboxypeptidase inhibitor	NULL	NULL	NULL	NULL	NULL
Dr24029	GO:0003899|GO:0006351|GO:0003677|GO:0009507|GO:0005730|GO:0006144|GO:0006206	EC:2.7.7.6	rna polymerase beta	IPR000722|IPR007080|IPR006592	RNA polymerase, alpha subunit|RNA polymerase Rpb1, domain 1|RNA polymerase, N-terminal	GO:0003677|GO:0003899|GO:0006351	EC:2.7.7.6	KEGG: 00230+2.7.7.6|KEGG: 00240+2.7.7.6|Reactome: REACT_1788
Dr24044	GO:0016772	NULL	probable lrr receptor-like serine threonine-protein kinase at4g08850-like	IPR000719|IPR001611|IPR013210|IPR025875|IPR011009	Protein kinase domain|Leucine-rich repeat|Leucine-rich repeat-containing N-terminal, type 2|Leucine rich repeat 4|Protein kinase-like domain	GO:0004672|GO:0005524|GO:0006468|GO:0005515|GO:0016772	NULL	NULL
Dr24045	NULL	NULL	NULL	NULL	NULL	NULL	NULL	NULL
Dr11261	GO:0005730|GO:0009409|GO:0003735|GO:0005886|GO:0022625|GO:0009507|GO:0006412|GO:0042254	NULL	protein	IPR005756|IPR008991|IPR014722	Ribosomal protein L26/L24P, eukaryotic/archaeal|Translation protein SH3-like domain|Ribosomal protein L2 domain 2	GO:0003735|GO:0006412|GO:0015934	NULL	Reactome: REACT_13698|Reactome: REACT_15380|Reactome: REACT_17015|Reactome: REACT_1762|Reactome: REACT_6167|Reactome: REACT_71
Dr11218	NULL	NULL	NULL	IPR000136	Oleosin	GO:0012511|GO:0016021	NULL	NULL
Dr11230	NULL	NULL	NULL	IPR008480	Protein of unknown function DUF761, plant	NULL	NULL	NULL
Dr11235	NULL	NULL	NULL	NULL	NULL	NULL	NULL	NULL
Dr11250	GO:0005886|GO:0009536	NULL	protein	NULL	NULL	NULL	NULL	NULL
Dr11262	NULL	NULL	NULL	NULL	NULL	NULL	NULL	NULL
Dr11272	NULL	NULL	NULL	NULL	NULL	NULL	NULL	NULL
Dr11322	NULL	NULL	NULL	IPR003480|IPR023213	Transferase|Chloramphenicol acetyltransferase-like domain	GO:0016747	NULL	NULL
Dr11380	GO:0016023	NULL	dirigent-like protein	IPR004265	Plant disease resistance response protein	NULL	NULL	NULL
Dr11384	NULL	NULL	NULL	IPR004265	Plant disease resistance response protein	NULL	NULL	NULL
Dr11358	GO:0016023|GO:0005739|GO:0009536|GO:0016740	NULL	galacturonosyltransferase 3	IPR002495	Glycosyl transferase, family 8	GO:0016757	NULL	NULL
Dr24079	NULL	NULL	NULL	IPR002885|IPR011990	Pentatricopeptide repeat|Tetratricopeptide-like helical	GO:0005515	NULL	NULL
Dr11405	GO:0046872|GO:0004784|GO:0009295|GO:0006801|GO:0044434|GO:0010038|GO:0055114|GO:0009411	EC:1.15.1.1	superoxide dismutase	IPR001189|IPR019832|IPR019831	Manganese/iron superoxide dismutase|Manganese/iron superoxide dismutase, C-terminal|Manganese/iron superoxide dismutase, N-terminal	GO:0004784|GO:0006801|GO:0046872|GO:0055114	NULL	MetaCyc: PWY-6854
Dr11391	NULL	NULL	NULL	IPR003441	NAC domain	GO:0003677|GO:0006355	NULL	NULL
Dr11461	GO:0016020|GO:0016023|GO:0009505|GO:0004566|GO:0005982|GO:0005985|GO:0006027|GO:0015994	EC:3.2.1.31	beta-glucuronidase precursor	IPR005199|IPR017853	Glycoside hydrolase, family 79|Glycoside hydrolase, superfamily	GO:0016020|GO:0016798	NULL	NULL
Dr11491	NULL	NULL	NULL	NULL	NULL	NULL	NULL	NULL
Dr24093	GO:0008270	NULL	ring finger and chy zinc finger domain-containing protein 1	IPR007231|IPR008913|IPR013083|IPR017921	Nucleoporin interacting component Nup93/Nic96|Zinc finger, CHY-type|Zinc finger, RING/FYVE/PHD-type|Zinc finger, CTCHY-type	GO:0005643|GO:0006810|GO:0008270	NULL	NULL
Dr11538	GO:0004553|GO:0071944|GO:0005975	EC:3.2.1.0	glycosyl hydrolase family 9 protein	IPR001701|IPR008928|IPR012341	Glycoside hydrolase, family 9|Six-hairpin glycosidase-like|Six-hairpin glycosidase	GO:0004553|GO:0005975|GO:0003824	EC:3.2.1.4	KEGG: 00500+3.2.1.4|MetaCyc: PWY-6788|MetaCyc: PWY-6805
Dr11506	GO:0003824	NULL	glutathione s-transferase zeta-class 1	IPR004045|IPR010987|IPR012336	Glutathione S-transferase, N-terminal|Glutathione S-transferase, C-terminal-like|Thioredoxin-like fold	GO:0005515	NULL	NULL
Dr11507	GO:0003824	NULL	glutathione s-transferase	IPR004045|IPR010987|IPR012336	Glutathione S-transferase, N-terminal|Glutathione S-transferase, C-terminal-like|Thioredoxin-like fold	GO:0005515	NULL	NULL
Dr11516	GO:0005093|GO:0048227|GO:0015031	NULL	gdp dissociation inhibitor	IPR018203|IPR000806	GDP dissociation inhibitor|Rab GDI protein	GO:0005093|GO:0015031	NULL	Reactome: REACT_11044
Dr11542	NULL	NULL	NULL	NULL	NULL	NULL	NULL	NULL
Dr11510	GO:0004672|GO:0016023|GO:0016310|GO:0016020	NULL	probable leucine-rich repeat receptor-like protein kinase at5g49770-like	IPR001245|IPR011009|IPR013320|IPR002290|IPR000719|IPR017441|IPR008271	Serine-threonine/tyrosine-protein kinase catalytic domain|Protein kinase-like domain|Concanavalin A-like lectin/glucanase, subgroup|Serine/threonine- / dual specificity protein kinase, catalytic domain|Protein kinase domain|Protein kinase, ATP binding site|Serine/threonine-protein kinase, active site	GO:0004672|GO:0006468|GO:0016772|GO:0005524|GO:0004674	NULL	NULL
Dr11545	NULL	NULL	NULL	IPR005162	Retrotransposon gag domain	NULL	NULL	NULL
Dr11550	GO:0006546|GO:0005960	NULL	biotinyl-lipoyl domain-containing protein	NULL	NULL	NULL	NULL	NULL
Dr11549	NULL	NULL	NULL	NULL	NULL	NULL	NULL	NULL
Dr11576	NULL	NULL	NULL	IPR013094|IPR002168	Alpha/beta hydrolase fold-3|Lipase, GDXG, active site	GO:0008152|GO:0016787	NULL	NULL
Dr11577	GO:0009536|GO:0052689	EC:3.1.1.0	protein	IPR013094	Alpha/beta hydrolase fold-3	GO:0008152|GO:0016787	NULL	NULL
Dr11589	GO:0044444	NULL	uncharacterized protein loc100845627	NULL	NULL	NULL	NULL	NULL
Dr11615	NULL	NULL	NULL	NULL	NULL	NULL	NULL	NULL
Dr11651	GO:0051287|GO:0005507|GO:0005777|GO:0006739|GO:0009651|GO:0042742|GO:0004450|GO:0000287|GO:0006102|GO:0010043|GO:0046686|GO:0005886|GO:0048046|GO:0006749|GO:0019643	EC:1.1.1.42	isocitrate dehydrogenase	IPR004790|IPR024084	Isocitrate dehydrogenase NADP-dependent|Isopropylmalate dehydrogenase-like domain	GO:0004450|GO:0006102|GO:0055114|GO:0016616	EC:1.1.1.42	KEGG: 00020+1.1.1.42|KEGG: 00480+1.1.1.42|KEGG: 00720+1.1.1.42|MetaCyc: PWY-5913|MetaCyc: PWY-6549|MetaCyc: PWY-6728|MetaCyc: PWY-6969|MetaCyc: PWY-7124|MetaCyc: PWY-7254|MetaCyc: PWY-7268
Dr11646	NULL	NULL	NULL	NULL	NULL	NULL	NULL	NULL
Dr11667	GO:0071704|GO:0044237|GO:0006950	NULL	pyridoxine biosynthesis protein	IPR001852|IPR011060	Vitamin B6 biosynthesis protein|Ribulose-phosphate binding barrel	GO:0042823|GO:0003824|GO:0008152	EC:4.-.-.-	KEGG: 00196+4.-.-.-|KEGG: 00750+4.-.-.-|KEGG: 00860+4.-.-.-|UniPathway: UPA00245
Dr01585	NULL	NULL	NULL	NULL	NULL	NULL	NULL	NULL
Dr01620	NULL	NULL	NULL	NULL	NULL	NULL	NULL	NULL
Dr01635	GO:0080167|GO:0016020|GO:0005739	NULL	protein	IPR016196	Major facilitator superfamily domain, general substrate transporter	NULL	NULL	NULL
Dr01647	NULL	NULL	NULL	NULL	NULL	NULL	NULL	NULL
Dr01651	GO:0005488|GO:0016491|GO:0016023	NULL	cytochrome p450 94a1-like	IPR001128|IPR002401|IPR017972	Cytochrome P450|Cytochrome P450, E-class, group I|Cytochrome P450, conserved site	GO:0005506|GO:0016705|GO:0020037|GO:0055114	NULL	Reactome: REACT_13433
Dr01653	GO:0016747	EC:2.3.1.0	bahd family clade v	IPR003480|IPR023213	Transferase|Chloramphenicol acetyltransferase-like domain	GO:0016747	NULL	NULL
Dr01631	GO:0016023|GO:0009682|GO:0009723	NULL	thaumatin-like protein	IPR001938	Thaumatin	NULL	NULL	NULL
Dr01693	NULL	NULL	NULL	NULL	NULL	NULL	NULL	NULL
Dr01667	NULL	NULL	NULL	NULL	NULL	NULL	NULL	NULL
Dr01672	NULL	NULL	NULL	NULL	NULL	NULL	NULL	NULL
Dr01674	GO:0016757	NULL	protein	IPR002213	UDP-glucuronosyl/UDP-glucosyltransferase	GO:0008152|GO:0016758	NULL	NULL
Dr01702	NULL	NULL	NULL	IPR027923|IPR016140	Hydrophobic seed protein|Bifunctional inhibitor/plant lipid transfer protein/seed storage helical domain	NULL	NULL	NULL
Dr01712	NULL	NULL	NULL	NULL	NULL	NULL	NULL	NULL
Dr01717	GO:0044763	NULL	ccsds_arath ame: full=cyclin-sds ame: full=protein solo dancers	IPR006671|IPR013763|IPR018316	Cyclin, N-terminal|Cyclin-like|Tubulin/FtsZ, 2-layer sandwich domain	GO:0003924|GO:0005525|GO:0006184|GO:0043234|GO:0051258	NULL	NULL
Dr01710	GO:0005488	NULL	hypothetical protein OsI_00415 [Oryza sativa Indica Group]	NULL	NULL	NULL	NULL	NULL
Dr01789	NULL	NULL	NULL	IPR001611|IPR013210|IPR003591	Leucine-rich repeat|Leucine-rich repeat-containing N-terminal, type 2|Leucine-rich repeat, typical subtype	GO:0005515	NULL	NULL
Dr01790	NULL	NULL	NULL	IPR001611|IPR013210|IPR003591	Leucine-rich repeat|Leucine-rich repeat-containing N-terminal, type 2|Leucine-rich repeat, typical subtype	GO:0005515	NULL	NULL
Dr01791	GO:0016772	NULL	disease resistance protein	NULL	NULL	NULL	NULL	NULL
Dr01822	NULL	NULL	NULL	NULL	NULL	NULL	NULL	NULL
Dr01772	NULL	NULL	NULL	IPR003703|IPR000595|IPR025652|IPR018490|IPR014710|IPR018488	Acyl-CoA thioesterase|Cyclic nucleotide-binding domain|Acyl-CoA thioesterase II domain|Cyclic nucleotide-binding-like|RmlC-like jelly roll fold|Cyclic nucleotide-binding, conserved site	GO:0006637|GO:0047617	NULL	NULL
Dr01781	GO:0016740	NULL	zeatin o-glucosyltransferase-like	IPR002213	UDP-glucuronosyl/UDP-glucosyltransferase	GO:0008152|GO:0016758	NULL	NULL
Dr01746	GO:0008152|GO:0050896|GO:0016616|GO:0071944	EC:1.1.1.0	(+)-neomenthol dehydrogenase-like	IPR002198|IPR001810|IPR016040|IPR002347	Short-chain dehydrogenase/reductase SDR|Glucose/ribitol dehydrogenase|F-box domain|NAD(P)-binding domain	GO:0008152|GO:0016491|GO:0005515	NULL	NULL
Dr01833	GO:0006457|GO:0016853	NULL	cyclophilin	IPR002130|IPR024936|IPR020892	Cyclophilin-like peptidyl-prolyl cis-trans isomerase domain|Cyclophilin-type peptidyl-prolyl cis-trans isomerase|Cyclophilin-type peptidyl-prolyl cis-trans isomerase, conserved site	GO:0003755|GO:0006457	NULL	NULL
Dr01859	GO:0046872|GO:0016023|GO:0016829	NULL	bifunctional monodehydroascorbate reductase and carbonic anhydrase nectarin-3-like	IPR023561|IPR001148|IPR018338	Carbonic anhydrase, alpha-class|Alpha carbonic anhydrase|Carbonic anhydrase, alpha-class, conserved site	GO:0004089|GO:0006730|GO:0008270	EC:4.2.1.1	KEGG: 00910+4.2.1.1|MetaCyc: PWY-6142
Dr01933	NULL	NULL	NULL	NULL	NULL	NULL	NULL	NULL
Dr01886	GO:0005886|GO:0009536	NULL	#NAME?	IPR003691	CrcB homologue	GO:0016020	NULL	NULL
Dr01841	GO:0016020	NULL	methylsterol monooxygenase ddb_g0269788-like	IPR006694	Fatty acid hydroxylase	GO:0005506|GO:0006633|GO:0016491|GO:0055114	NULL	NULL
Dr01924	GO:0016787	NULL	xylem serine proteinase 1	IPR015500|IPR000209|IPR022398	Peptidase S8, subtilisin-related|Peptidase S8/S53 domain|Peptidase S8, subtilisin, His-active site	GO:0004252|GO:0006508	NULL	NULL
Dr24128	NULL	NULL	NULL	IPR001611|IPR025875|IPR003591	Leucine-rich repeat|Leucine rich repeat 4|Leucine-rich repeat, typical subtype	GO:0005515	NULL	NULL
Dr24130	NULL	NULL	NULL	IPR001611|IPR003591	Leucine-rich repeat|Leucine-rich repeat, typical subtype	GO:0005515	NULL	NULL
Dr11752	GO:0005730|GO:0003735|GO:0006414|GO:0022627|GO:0000028|GO:0005886	NULL	40s ribosomal protein s17-4	IPR001210|IPR000092|IPR008949|IPR018273	Ribosomal protein S17e|Polyprenyl synthetase|Terpenoid synthase|Ribosomal protein S17e, conserved site	GO:0003735|GO:0005622|GO:0005840|GO:0006412|GO:0008299	NULL	NULL
Dr11711	NULL	NULL	NULL	NULL	NULL	NULL	NULL	NULL
Dr11725	NULL	NULL	NULL	NULL	NULL	NULL	NULL	NULL
Dr11775	GO:0016301	NULL	serine-threonine protein plant-	IPR001611|IPR025875	Leucine-rich repeat|Leucine rich repeat 4	GO:0005515	NULL	NULL
Dr11808	GO:0050832|GO:0016023|GO:0009627	NULL	qltg3-1	IPR027923|IPR016140	Hydrophobic seed protein|Bifunctional inhibitor/plant lipid transfer protein/seed storage helical domain	NULL	NULL	NULL
Dr11828	GO:0003700|GO:0003677|GO:0006355|GO:0005667|GO:0045449	NULL	ethylene responsive element binding factor 5	IPR001471|IPR016177	AP2/ERF domain|DNA-binding domain	GO:0003700|GO:0006355|GO:0003677	NULL	NULL
Dr11885	GO:0048767|GO:0030244|GO:0030173|GO:0009409|GO:0016760|GO:0005783|GO:0005886|GO:0005982|GO:0005985|GO:0006011	EC:2.4.1.12	cellulose synthase-like protein	IPR005150|IPR013083	Cellulose synthase|Zinc finger, RING/FYVE/PHD-type	GO:0016020|GO:0016760|GO:0030244	NULL	NULL
Dr11903	GO:0004674|GO:0009069|GO:0016310	EC:2.7.11.0	cyclin-dependent kinase f-4-like	IPR000719|IPR011009|IPR002290|IPR017441|IPR008271	Protein kinase domain|Protein kinase-like domain|Serine/threonine- / dual specificity protein kinase, catalytic domain|Protein kinase, ATP binding site|Serine/threonine-protein kinase, active site	GO:0004672|GO:0005524|GO:0006468|GO:0016772|GO:0004674	NULL	NULL
Dr11904	NULL	NULL	NULL	NULL	NULL	NULL	NULL	NULL
Dr11795	GO:0016772|GO:0046483|GO:0097159|GO:0034641|GO:1901360|GO:0006725|GO:1901363	NULL	uncharacterized protein loc100249130	IPR001128|IPR025558|IPR005135|IPR002401	Cytochrome P450|Domain of unknown function DUF4283|Cytochrome P450, E-class, group I|Endonuclease/exonuclease/phosphatase	GO:0005506|GO:0016705|GO:0020037|GO:0055114	NULL	Reactome: REACT_13433
Dr11860	NULL	NULL	NULL	NULL	NULL	NULL	NULL	NULL
Dr11869	GO:0009507	NULL	uncharacterized protein	IPR021825	Protein of unknown function DUF3411, plant	NULL	NULL	NULL
Dr11871	GO:0005739	NULL	armadillo beta-catenin-like repeat-containing protein	IPR000225|IPR004314|IPR016024|IPR011989	Armadillo|Domain of unknown function DUF239|Armadillo-type fold|Armadillo-like helical	GO:0005515|GO:0005488	NULL	NULL
Dr11872	GO:0016874	NULL	e3 ubiquitin-protein ligase os04g0590900-like	IPR001841|IPR013083	Zinc finger, RING-type|Zinc finger, RING/FYVE/PHD-type	GO:0005515|GO:0008270	NULL	NULL
Dr11905	GO:0008152|GO:0008233	NULL	subtilisin-like protease sdd1-like	IPR015500|IPR000209|IPR003137|IPR010259|IPR023827	Peptidase S8, subtilisin-related|Peptidase S8/S53 domain|Protease-associated domain, PA|Proteinase inhibitor I9|Peptidase S8, subtilisin, Asp-active site	GO:0004252|GO:0006508|GO:0042802|GO:0043086	NULL	NULL
Dr11915	NULL	NULL	NULL	NULL	NULL	NULL	NULL	NULL
Dr24150	NULL	NULL	NULL	IPR001611|IPR025875	Leucine-rich repeat|Leucine rich repeat 4	GO:0005515	NULL	NULL
Dr11918	NULL	NULL	NULL	NULL	NULL	NULL	NULL	NULL
Dr11922	GO:0044765|GO:0050896|GO:0071705|GO:0016020|GO:0005215	NULL	protein	IPR000109|IPR016196	Proton-dependent oligopeptide transporter family|Major facilitator superfamily domain, general substrate transporter	GO:0005215|GO:0006810|GO:0016020	NULL	Reactome: REACT_15518|Reactome: REACT_19419
Dr11958	GO:0006412|GO:0005730|GO:0003735|GO:0009941|GO:0071493|GO:0005773|GO:0032502|GO:0022625|GO:0005886|GO:0042254	NULL	60s ribosomal protein l10	IPR016180|IPR001197|IPR018255	Ribosomal protein L10e/L16|Ribosomal protein L10e|Ribosomal protein L10e, conserved site	GO:0003735|GO:0005840|GO:0006412|GO:0005622	NULL	NULL
Dr11974	GO:0043231|GO:0044444|GO:0016787	NULL	gda1 cd39 family expressed	IPR000407	Nucleoside phosphatase GDA1/CD39	GO:0016787	NULL	NULL
Dr12005	NULL	NULL	NULL	NULL	NULL	NULL	NULL	NULL
Dr12025	NULL	NULL	NULL	IPR024553	Domain of unknown function DUF2828	NULL	NULL	NULL
Dr11917	NULL	NULL	NULL	NULL	NULL	NULL	NULL	NULL
Dr11944	NULL	NULL	NULL	NULL	NULL	NULL	NULL	NULL
Dr11955	NULL	NULL	NULL	IPR003959|IPR027417	ATPase, AAA-type, core|P-loop containing nucleoside triphosphate hydrolase	GO:0005524	NULL	NULL
Dr11997	NULL	NULL	NULL	NULL	NULL	NULL	NULL	NULL
Dr12028	NULL	NULL	NULL	NULL	NULL	NULL	NULL	NULL
Dr12030	GO:0005488|GO:0006979|GO:0016491|GO:0008152|GO:0009536	NULL	peroxidase 1	IPR002016|IPR010255|IPR000823|IPR019793	Haem peroxidase, plant/fungal/bacterial|Plant peroxidase|Haem peroxidase|Peroxidases heam-ligand binding site	GO:0004601|GO:0006979|GO:0020037|GO:0055114	EC:1.11.1.7	KEGG: 00360+1.11.1.7|KEGG: 00940+1.11.1.7|MetaCyc: PWY-5461|MetaCyc: PWY-7214
Dr24178	NULL	NULL	NULL	NULL	NULL	NULL	NULL	NULL
Dr24179	NULL	NULL	NULL	NULL	NULL	NULL	NULL	NULL
Dr12044	NULL	NULL	NULL	NULL	NULL	NULL	NULL	NULL
Dr12045	GO:0016023|GO:0016614|GO:0016020	NULL	uncharacterized protein	NULL	NULL	NULL	NULL	NULL
Dr12063	NULL	NULL	NULL	IPR005162	Retrotransposon gag domain	NULL	NULL	NULL
Dr12083	GO:0005525|GO:0007264|GO:0015031	NULL	ras-related protein rhn1	IPR001806|IPR027417	Small GTPase superfamily|P-loop containing nucleoside triphosphate hydrolase	GO:0005525|GO:0007264	NULL	NULL
Dr12054	NULL	NULL	NULL	IPR004873	BURP domain	NULL	NULL	NULL
Dr12064	NULL	NULL	NULL	NULL	NULL	NULL	NULL	NULL
Dr24195	GO:0009536	NULL	cbs octicosapeptide phox bemp1 domain-containing protein	IPR000644	CBS domain	GO:0030554	NULL	NULL
Dr12087	NULL	NULL	NULL	NULL	NULL	NULL	NULL	NULL
Dr12111	GO:0016023	NULL	protein	NULL	NULL	NULL	NULL	NULL
Dr12150	GO:0044464|GO:0016740	NULL	probable xyloglucan endotransglucosylase hydrolase protein 23-like	IPR000757|IPR008985|IPR013320	Glycoside hydrolase, family 16|Concanavalin A-like lectin/glucanases superfamily|Concanavalin A-like lectin/glucanase, subgroup	GO:0004553|GO:0005975	NULL	NULL
Dr12155	GO:0005737|GO:0031408|GO:0005506|GO:0016165|GO:0055114	EC:1.13.11.12	lipoxygenase	IPR000907|IPR013819	Lipoxygenase|Lipoxygenase, C-terminal	GO:0016702|GO:0046872|GO:0055114	NULL	NULL
Dr12139	GO:0044249|GO:0008610|GO:0016023|GO:0006665|GO:0003824|GO:0016020	NULL	protein sur2	NULL	NULL	NULL	NULL	NULL
Dr12145	NULL	NULL	NULL	NULL	NULL	NULL	NULL	NULL
Dr12176	NULL	NULL	NULL	NULL	NULL	NULL	NULL	NULL
Dr12178	NULL	NULL	NULL	IPR009071	High mobility group box domain	NULL	NULL	NULL
Dr12223	GO:0009987	NULL	ap3-complex subunit beta-a-like	IPR003874	CDC45 family	GO:0006270	NULL	NULL
Dr12213	NULL	NULL	NULL	NULL	NULL	NULL	NULL	NULL
Dr12224	GO:0005488	NULL	retrotransposon gag protein	NULL	NULL	NULL	NULL	NULL
Dr12198	NULL	NULL	NULL	NULL	NULL	NULL	NULL	NULL
Dr24239	NULL	NULL	NULL	NULL	NULL	NULL	NULL	NULL
Dr12229	NULL	NULL	NULL	NULL	NULL	NULL	NULL	NULL
Dr12231	GO:0009536	NULL	cbs octicosapeptide phox bemp1 domain-containing protein	IPR000644	CBS domain	GO:0030554	NULL	NULL
Dr12235	GO:0005488	NULL	retrotransposon gag protein	IPR005162	Retrotransposon gag domain	NULL	NULL	NULL
Dr12227	NULL	NULL	NULL	IPR001480	Bulb-type lectin domain	NULL	NULL	NULL
Dr12237	GO:0045239|GO:0006979|GO:0048868|GO:0042128|GO:0006106|GO:0005829|GO:0009651|GO:0005739|GO:0004333|GO:0019643	EC:4.2.1.2	fumarate class ii	IPR000362|IPR022761|IPR008948	Fumarate lyase family|Fumarate lyase, N-terminal|L-Aspartase-like	GO:0003824	NULL	NULL
Dr12253	NULL	NULL	NULL	NULL	NULL	NULL	NULL	NULL
Dr12246	GO:0003700|GO:0043565|GO:0006355|GO:0005667|GO:0045449	NULL	uncharacterized protein loc100273133	NULL	NULL	NULL	NULL	NULL
Dr12250	NULL	NULL	NULL	NULL	NULL	NULL	NULL	NULL
Dr12251	NULL	NULL	NULL	NULL	NULL	NULL	NULL	NULL
Dr24265	NULL	NULL	NULL	IPR002885|IPR011990	Pentatricopeptide repeat|Tetratricopeptide-like helical	GO:0005515	NULL	NULL
Dr12268	GO:0050896|GO:0016772|GO:0044763|GO:0044464|GO:0016020	NULL	receptor protein	IPR000719|IPR011009	Protein kinase domain|Protein kinase-like domain	GO:0004672|GO:0005524|GO:0006468|GO:0016772	NULL	NULL
Dr12270	GO:0033993|GO:0097305|GO:0009725|GO:0048856|GO:0016310|GO:0016301|GO:0007165|GO:0005886	NULL	receptor protein	IPR000719|IPR011009	Protein kinase domain|Protein kinase-like domain	GO:0004672|GO:0005524|GO:0006468|GO:0016772	NULL	NULL
Dr12271	GO:0003676|GO:0044444|GO:0000166|GO:0043231	NULL	phosphoglycolate phosphatase	IPR012677	Nucleotide-binding, alpha-beta plait	GO:0000166	NULL	NULL
Dr12266	NULL	NULL	NULL	NULL	NULL	NULL	NULL	NULL
Dr12272	GO:0000079|GO:0019901|GO:0005739|GO:0051301	NULL	protein	IPR013922	Cyclin PHO80-like	GO:0000079|GO:0019901	NULL	NULL
Dr12303	GO:0006812|GO:0016020|GO:0015297	NULL	na+ h+ antiporter	IPR018422|IPR006153	Cation/H+ exchanger, CPA1 family|Cation/H+ exchanger	GO:0006812|GO:0015299|GO:0016021|GO:0055085	NULL	Reactome: REACT_15518
Dr12336	GO:0016798|GO:0016023|GO:0071944	NULL	beta- -glucanase	IPR000490|IPR017853|IPR013781	Glycoside hydrolase, family 17|Glycoside hydrolase, superfamily|Glycoside hydrolase, catalytic domain	GO:0004553|GO:0005975|GO:0003824	EC:3.2.1.39	KEGG: 00500+3.2.1.39
Dr12339	GO:0004084|GO:0006550|GO:0006552|GO:0006574|GO:0009097|GO:0009098|GO:0009099|GO:0015940	EC:2.6.1.42	branched-chain-amino-acid aminotransferase-like protein 2	IPR001544	Aminotransferase, class IV	GO:0003824|GO:0008152	NULL	Reactome: REACT_13
Dr12279	GO:0008146	EC:2.8.2.0	flavonol sulfotransferase-like	IPR000863|IPR027417	Sulfotransferase domain|P-loop containing nucleoside triphosphate hydrolase	GO:0008146	NULL	NULL
Dr12328	NULL	NULL	NULL	IPR001680|IPR017986|IPR015943	WD40 repeat|WD40-repeat-containing domain|WD40/YVTN repeat-like-containing domain	GO:0005515	NULL	NULL
Dr24292	GO:0016772	NULL	receptor protein kinase-like protein	IPR001611|IPR001245|IPR025875|IPR011009|IPR003591	Leucine-rich repeat|Serine-threonine/tyrosine-protein kinase catalytic domain|Leucine rich repeat 4|Protein kinase-like domain|Leucine-rich repeat, typical subtype	GO:0005515|GO:0004672|GO:0006468|GO:0016772	NULL	NULL
Dr24296	NULL	NULL	NULL	NULL	NULL	NULL	NULL	NULL
Dr12352	GO:0030170|GO:0006536|GO:0004351|GO:0006522|GO:0006531|GO:0019482|GO:0019530	EC:4.1.1.15	glutamate decarboxylase	IPR010107|IPR002129|IPR015424|IPR015421	Glutamate decarboxylase|Pyridoxal phosphate-dependent decarboxylase|Pyridoxal phosphate-dependent transferase|Pyridoxal phosphate-dependent transferase, major region, subdomain 1	GO:0004351|GO:0006536|GO:0030170|GO:0016831|GO:0019752|GO:0003824	EC:4.1.1.15	KEGG: 00250+4.1.1.15|KEGG: 00410+4.1.1.15|KEGG: 00430+4.1.1.15|KEGG: 00650+4.1.1.15|MetaCyc: PWY-4321
Dr12353	GO:0030170|GO:0005516|GO:0006536|GO:0004351|GO:0006522|GO:0006531|GO:0019482|GO:0019530	EC:4.1.1.15	glutamate decarboxylase	IPR010107|IPR002129|IPR015424|IPR015421|IPR015422	Glutamate decarboxylase|Pyridoxal phosphate-dependent decarboxylase|Pyridoxal phosphate-dependent transferase|Pyridoxal phosphate-dependent transferase, major region, subdomain 1|Pyridoxal phosphate-dependent transferase, major region, subdomain 2	GO:0004351|GO:0006536|GO:0030170|GO:0016831|GO:0019752|GO:0003824	EC:4.1.1.15	KEGG: 00250+4.1.1.15|KEGG: 00410+4.1.1.15|KEGG: 00430+4.1.1.15|KEGG: 00650+4.1.1.15|MetaCyc: PWY-4321
Dr12466	NULL	NULL	NULL	NULL	NULL	NULL	NULL	NULL
Dr12473	NULL	NULL	NULL	NULL	NULL	NULL	NULL	NULL
Dr12350	NULL	NULL	NULL	NULL	NULL	NULL	NULL	NULL
Dr12370	NULL	NULL	NULL	IPR009719|IPR009060	Protein of unknown function DUF1296, plant|UBA-like	GO:0005515	NULL	NULL
Dr12420	GO:0016568|GO:0016747|GO:0005739|GO:0046872|GO:0006351	EC:2.3.1.0	histone acetyltransferase	NULL	NULL	NULL	NULL	NULL
Dr12461	GO:0004553|GO:0005975	EC:3.2.1.0	beta-galactosidase	IPR001944|IPR000922|IPR008979|IPR017853|IPR013781|IPR019801	Glycoside hydrolase, family 35|D-galactoside/L-rhamnose binding SUEL lectin domain|Galactose-binding domain-like|Glycoside hydrolase, superfamily|Glycoside hydrolase, catalytic domain|Glycoside hydrolase, family 35, conserved site	GO:0004553|GO:0005975|GO:0030246|GO:0003824	EC:3.2.1.23	KEGG: 00052+3.2.1.23|KEGG: 00511+3.2.1.23|KEGG: 00531+3.2.1.23|KEGG: 00600+3.2.1.23|KEGG: 00604+3.2.1.23|MetaCyc: PWY-6791|MetaCyc: PWY-6807
Dr12465	GO:0055114|GO:0009620|GO:0080086|GO:0009536|GO:0009555|GO:0016165|GO:0009901|GO:0005506|GO:0031408	EC:1.13.11.12	lipoxygenase	IPR000907|IPR013819|IPR001024|IPR008976|IPR027433|IPR001246|IPR020834|IPR020833	Lipoxygenase|Lipoxygenase, C-terminal|PLAT/LH2 domain|Lipoxygenase, plant|Lipase/lipooxygenase, PLAT/LH2|Lipoxygenase, domain 3|Lipoxygenase, conserved site|Lipoxygenase, iron binding site	GO:0016702|GO:0046872|GO:0055114|GO:0005515|GO:0005506|GO:0016165	NULL	UniPathway: UPA00382
Dr12467	NULL	NULL	NULL	IPR002182|IPR027417|IPR000767	NB-ARC|Disease resistance protein|P-loop containing nucleoside triphosphate hydrolase	GO:0043531|GO:0006952	NULL	NULL
Dr24302	NULL	NULL	NULL	NULL	NULL	NULL	NULL	NULL
Dr24303	GO:0005737|GO:0045548|GO:0009800|GO:0006559|GO:0006570|GO:0009821	EC:4.3.1.5	phenylalanine ammonia-lyase	IPR001106|IPR008948|IPR023144|IPR005922	Aromatic amino acid lyase|L-Aspartase-like|Phenylalanine ammonia-lyase, shielding domain|Phenylalanine ammonia-lyase	GO:0009058|GO:0016841|GO:0003824|GO:0005737|GO:0006559	EC:4.3.1.24	KEGG: 00360+4.3.1.24|KEGG: 00940+4.3.1.24|MetaCyc: PWY-1121|MetaCyc: PWY-5883|MetaCyc: PWY-6444|MetaCyc: PWY-6457|UniPathway: UPA00713
Dr24309	GO:0009987|GO:0097159|GO:0008152|GO:0004518|GO:1901363	NULL	replication associated protein	IPR022690|IPR022692|IPR001191|IPR001301	Geminivirus AL1 replication-associated protein, catalytic domain|Geminivirus AL1 replication-associated protein, central domain|Geminivirus AL1, replication-associated protein|Geminivirus AL1 replication-associated protein, CLV type	GO:0006260|GO:0016888|GO:0005198|GO:0019028	EC:2.7.7.-	KEGG: 00520+2.7.7.-
Dr24314	GO:0050896|GO:0043231|GO:0044444	NULL	cysteine-rich receptor-like protein kinase 25-like	IPR002902	Gnk2-homologous domain	NULL	NULL	NULL
Dr12487	GO:0050896|GO:0044763|GO:0016310|GO:0016301|GO:0044464|GO:0016020	NULL	atp binding protein	IPR001245|IPR011009|IPR000719	Serine-threonine/tyrosine-protein kinase catalytic domain|Protein kinase-like domain|Protein kinase domain	GO:0004672|GO:0006468|GO:0016772|GO:0005524	NULL	NULL
Dr12505	GO:0044424	NULL	protein	IPR005269	Cytokinin riboside 5'-monophosphate phosphoribohydrolase LOG	NULL	NULL	NULL
Dr12510	GO:0046872|GO:0005515|GO:0003824	NULL	brca1-associated	IPR011422	BRCA1-associated 2	NULL	NULL	NULL
Dr12512	NULL	NULL	NULL	NULL	NULL	NULL	NULL	NULL
Dr12540	GO:0031418|GO:0005506|GO:0004656|GO:0005739|GO:0055114|GO:0006525|GO:0006560|GO:0018401	EC:1.14.11.2	prolyl 4-hydroxylase alpha-2 subunit	IPR005123|IPR006620	Oxoglutarate/iron-dependent dioxygenase|Prolyl 4-hydroxylase, alpha subunit	GO:0016491|GO:0016706|GO:0055114|GO:0005506|GO:0016705|GO:0031418	NULL	NULL
Dr12561	NULL	NULL	NULL	NULL	NULL	NULL	NULL	NULL
Dr12574	NULL	NULL	NULL	IPR002885	Pentatricopeptide repeat	NULL	NULL	NULL
Dr12514	NULL	NULL	NULL	NULL	NULL	NULL	NULL	NULL
Dr12532	GO:0005576|GO:0016023|GO:0046872|GO:0016491	NULL	germin-like protein	IPR006045|IPR011051|IPR014710|IPR001929|IPR019780	Cupin 1|Germin|RmlC-like cupin domain|RmlC-like jelly roll fold|Germin, manganese binding site	GO:0045735|GO:0030145	NULL	NULL
Dr12563	GO:0012505|GO:0005794|GO:0000003	NULL	vacuolar protein sorting-associated protein 52 homolog	IPR007258	Vps52/Sac2	NULL	NULL	NULL
Dr12573	NULL	NULL	NULL	IPR001841|IPR013083	Zinc finger, RING-type|Zinc finger, RING/FYVE/PHD-type	GO:0005515|GO:0008270	NULL	NULL
Dr12587	NULL	NULL	NULL	NULL	NULL	NULL	NULL	NULL
Dr12609	GO:0016023|GO:0016301	NULL	phytosulfokine receptor precursor	IPR001611|IPR001245|IPR011009|IPR013320|IPR003591|IPR000719	Leucine-rich repeat|Serine-threonine/tyrosine-protein kinase catalytic domain|Protein kinase-like domain|Concanavalin A-like lectin/glucanase, subgroup|Leucine-rich repeat, typical subtype|Protein kinase domain	GO:0005515|GO:0004672|GO:0006468|GO:0016772|GO:0005524	NULL	NULL
Dr12625	GO:0005488|GO:0016491|GO:0044237|GO:0009536|GO:0055114	NULL	ferredoxin--nadp root chloroplastic-like	IPR015701|IPR001433|IPR008333|IPR017938|IPR017927	Ferredoxin--NADP reductase|Oxidoreductase FAD/NAD(P)-binding|Oxidoreductase, FAD-binding domain|Riboflavin synthase-like beta-barrel|Ferredoxin reductase-type FAD-binding domain	GO:0016491|GO:0055114	EC:1.18.1.2	KEGG: 00195+1.18.1.2|MetaCyc: PWY-101|MetaCyc: PWY-7230
Dr24315	GO:0003676|GO:0000166	NULL	rna-binding protein with multiple splicing	IPR012677	Nucleotide-binding, alpha-beta plait	GO:0000166	NULL	NULL
Dr12635	NULL	NULL	NULL	IPR022690|IPR022692|IPR001301	Geminivirus AL1 replication-associated protein, catalytic domain|Geminivirus AL1 replication-associated protein, central domain|Geminivirus AL1 replication-associated protein, CLV type	GO:0006260|GO:0016888|GO:0005198|GO:0019028	EC:2.7.7.-	KEGG: 00520+2.7.7.-
Dr12648	NULL	NULL	NULL	NULL	NULL	NULL	NULL	NULL
Dr12685	GO:0009536	NULL	uncharacterized protein	NULL	NULL	NULL	NULL	NULL
Dr12660	NULL	NULL	NULL	IPR011990|IPR013026	Tetratricopeptide-like helical|Tetratricopeptide repeat-containing domain	GO:0005515	NULL	NULL
Dr12663	GO:0016787	NULL	subtilisin-like serine protease	IPR015500|IPR000209	Peptidase S8, subtilisin-related|Peptidase S8/S53 domain	GO:0004252|GO:0006508	NULL	NULL
Dr12674	GO:0005975|GO:0016857	EC:5.1.3.0	ribulose-phosphate 3-epimerase	IPR000056|IPR011060|IPR013785	Ribulose-phosphate 3-epimerase-like|Ribulose-phosphate binding barrel|Aldolase-type TIM barrel	GO:0005975|GO:0016857|GO:0003824|GO:0008152	EC:5.1.3.1	KEGG: 00030+5.1.3.1|KEGG: 00040+5.1.3.1|KEGG: 00710+5.1.3.1|MetaCyc: PWY-1861|MetaCyc: PWY-5723
Dr02048	GO:0043229	NULL	cullin-1-like isoform 1	IPR001373|IPR019559|IPR016159|IPR016158|IPR011991|IPR016157	Cullin, N-terminal|Cullin protein, neddylation domain|Cullin repeat-like-containing domain|Cullin homology|Winged helix-turn-helix DNA-binding domain|Cullin, conserved site	GO:0006511|GO:0031461|GO:0031625	NULL	UniPathway: UPA00143
Dr01975	GO:0003735|GO:0022627|GO:0006412|GO:0042254	NULL	ubiquitin extension protein	IPR002906|IPR011332	Ribosomal protein S27a|Zinc-binding ribosomal protein	GO:0003735|GO:0005622|GO:0005840|GO:0006412	NULL	NULL
Dr02038	GO:0051707|GO:0008270|GO:0016874|GO:0045087|GO:1901700|GO:0009696|GO:0014070	NULL	e3 ubiquitin-protein ligase bah1	IPR004331|IPR013083|IPR001841	SPX, N-terminal|Zinc finger, RING/FYVE/PHD-type|Zinc finger, RING-type	GO:0005515|GO:0008270	NULL	NULL
Dr02070	GO:0016023	NULL	adipocyte plasma membrane-associated protein	IPR018119|IPR011042	Strictosidine synthase, conserved region|Six-bladed beta-propeller, TolB-like	GO:0009058|GO:0016844	NULL	NULL
Dr02072	GO:0016023	NULL	strictosidine synthase 1-like	IPR018119|IPR011042	Strictosidine synthase, conserved region|Six-bladed beta-propeller, TolB-like	GO:0009058|GO:0016844	NULL	NULL
Dr02088	GO:0046872|GO:0005739	NULL	thioredoxin-related protein	IPR001841|IPR013083	Zinc finger, RING-type|Zinc finger, RING/FYVE/PHD-type	GO:0005515|GO:0008270	NULL	NULL
Dr02097	NULL	NULL	NULL	IPR003480|IPR023213	Transferase|Chloramphenicol acetyltransferase-like domain	GO:0016747	NULL	NULL
Dr02134	GO:0004822|GO:0002161|GO:0006428|GO:0006450|GO:0005524|GO:0046686|GO:0005737|GO:0009097|GO:0009098|GO:0009099	EC:6.1.1.5	isoleucyl-trna cytoplasmic-like	IPR002300|IPR009008|IPR014729|IPR002301|IPR001412	Aminoacyl-tRNA synthetase, class Ia|Isoleucine-tRNA ligase|Valyl/Leucyl/Isoleucyl-tRNA synthetase, editing domain|Rossmann-like alpha/beta/alpha sandwich fold|Aminoacyl-tRNA synthetase, class I, conserved site	GO:0000166|GO:0004812|GO:0005524|GO:0006418|GO:0002161|GO:0004822|GO:0005737|GO:0006428	EC:6.1.1.5	Reactome: REACT_71|KEGG: 00970+6.1.1.5|Reactome: REACT_71
Dr02141	GO:0016491|GO:0005488	NULL	nadph quinone oxidoreductase	IPR002085|IPR013154|IPR011032	Alcohol dehydrogenase superfamily, zinc-type|Alcohol dehydrogenase GroES-like|GroES (chaperonin 10)-like	GO:0008270|GO:0016491|GO:0055114	NULL	NULL
Dr02165	GO:0016020	NULL	nodulin 21 family expressed	IPR000620	Drug/metabolite transporter	GO:0016020	NULL	NULL
Dr02212	GO:0016023|GO:0016020|GO:0016772	NULL	receptor-like serine threonine kinase	IPR021720|IPR013320	Malectin|Concanavalin A-like lectin/glucanase, subgroup	NULL	NULL	NULL
Dr02243	NULL	NULL	NULL	NULL	NULL	NULL	NULL	NULL
Dr02289	NULL	NULL	NULL	NULL	NULL	NULL	NULL	NULL
Dr02297	NULL	NULL	NULL	NULL	NULL	NULL	NULL	NULL
Dr02246	GO:0055071|GO:0005886|GO:0055072|GO:0005381|GO:0034755|GO:0016021	NULL	metal transporter nramp6	IPR001046	Natural resistance-associated macrophage like	GO:0005215|GO:0006810|GO:0016020	NULL	Reactome: REACT_15518
Dr02264	NULL	NULL	NULL	IPR002885|IPR011990	Pentatricopeptide repeat|Tetratricopeptide-like helical	GO:0005515	NULL	NULL
Dr02299	NULL	NULL	NULL	NULL	NULL	NULL	NULL	NULL
Dr02338	NULL	NULL	NULL	IPR002048|IPR011992|IPR018247	EF-hand domain|EF-hand domain pair|EF-Hand 1, calcium-binding site	GO:0005509	NULL	NULL
Dr02342	GO:0005737|GO:0000045|GO:0080025|GO:0008270|GO:0032266	NULL	atg18c-like protein	IPR001680|IPR017986|IPR015943	WD40 repeat|WD40-repeat-containing domain|WD40/YVTN repeat-like-containing domain	GO:0005515	NULL	NULL
Dr02313	NULL	NULL	NULL	IPR023278	Ethylene insensitive 3-like protein, DNA-binding domain	GO:0003700|GO:0005634	NULL	NULL
Dr02302	NULL	NULL	NULL	NULL	NULL	NULL	NULL	NULL
Dr02332	NULL	NULL	NULL	IPR007612|IPR025659	LURP1-like domain|Tubby C-terminal-like domain	NULL	NULL	NULL
Dr02344	NULL	NULL	NULL	IPR027356	NPH3 domain	NULL	NULL	UniPathway: UPA00143
Dr02346	NULL	NULL	NULL	IPR027356	NPH3 domain	NULL	NULL	UniPathway: UPA00143
Dr02347	GO:0016023|GO:0004672|GO:0006468|GO:0005524|GO:0016020	NULL	receptor-like protein kinase	IPR000719|IPR001611|IPR013210|IPR025875|IPR011009|IPR003591	Protein kinase domain|Leucine-rich repeat|Leucine-rich repeat-containing N-terminal, type 2|Leucine rich repeat 4|Protein kinase-like domain|Leucine-rich repeat, typical subtype	GO:0004672|GO:0005524|GO:0006468|GO:0005515|GO:0016772	NULL	NULL
Dr02356	NULL	NULL	NULL	NULL	NULL	NULL	NULL	NULL
Dr02488	NULL	NULL	NULL	NULL	NULL	NULL	NULL	NULL
Dr02427	GO:0009746|GO:0006541|GO:0070981|GO:0005524|GO:0004066|GO:0006522|GO:0006531	EC:6.3.5.4	asparagine synthetase	IPR002109|IPR001962|IPR000583|IPR012336|IPR014729|IPR004480|IPR017932	Glutaredoxin|Asparagine synthase|Class II glutamine amidotransferase domain|Thioredoxin-like fold|Rossmann-like alpha/beta/alpha sandwich fold|Monothiol glutaredoxin-related|Glutamine amidotransferase type 2 domain	GO:0009055|GO:0015035|GO:0045454|GO:0004066|GO:0006529|GO:0008152	NULL	NULL
Dr02430	NULL	NULL	NULL	IPR007524	Pectate lyase, N-terminal	GO:0030570	EC:4.2.2.2	KEGG: 00040+4.2.2.2|UniPathway: UPA00545
Dr02377	NULL	NULL	NULL	IPR004146	DC1	NULL	NULL	NULL
Dr02484	GO:0005576|GO:0016020|GO:0009664|GO:0006949	NULL	expansin	IPR002963|IPR009009|IPR014733|IPR007118|IPR007112	Expansin|RlpA-like double-psi beta-barrel domain|Expansin/Lol pI|Barwin-like endoglucanase|Expansin/pollen allergen, DPBB domain	GO:0009664|GO:0005576	NULL	NULL
Dr02383	GO:0009615|GO:0005618|GO:0055114|GO:0005730|GO:0009409|GO:0009941|GO:0009408|GO:0009617|GO:0005524|GO:0032440|GO:0005773|GO:0046686|GO:0022626|GO:0080167|GO:0005886|GO:0048046	EC:1.3.1.74	heat shock protein 70	IPR013126|IPR018181	Heat shock protein 70 family|Heat shock protein 70, conserved site	NULL	NULL	NULL
Dr02392	GO:0007264|GO:0005773|GO:0016787|GO:0015031|GO:0005525|GO:0005886|GO:0009873	NULL	ras-related protein	IPR001806|IPR027417|IPR020849|IPR003578|IPR003579	Small GTPase superfamily|P-loop containing nucleoside triphosphate hydrolase|Small GTPase superfamily, Ras type|Small GTPase superfamily, Rho type|Small GTPase superfamily, Rab type	GO:0005525|GO:0007264|GO:0003924|GO:0006184|GO:0007165|GO:0016020|GO:0005622|GO:0015031	NULL	Reactome: REACT_11044
Dr02402	GO:0044763|GO:0005739|GO:0016023|GO:0016301|GO:0032502	NULL	receptor-like protein kinase	IPR001245|IPR024788|IPR011009|IPR013320|IPR002290|IPR000719|IPR017441|IPR008271	Serine-threonine/tyrosine-protein kinase catalytic domain|Malectin-like carbohydrate-binding domain|Protein kinase-like domain|Concanavalin A-like lectin/glucanase, subgroup|Serine/threonine- / dual specificity protein kinase, catalytic domain|Protein kinase domain|Protein kinase, ATP binding site|Serine/threonine-protein kinase, active site	GO:0004672|GO:0006468|GO:0016772|GO:0005524|GO:0004674	NULL	NULL
Dr02403	GO:0016020|GO:0000166|GO:0044464|GO:0016887|GO:0009987	EC:3.6.1.3	white-brown-complex abc transporter family	IPR003439|IPR013525|IPR027417|IPR003593|IPR017871	ABC transporter-like|ABC-2 type transporter|P-loop containing nucleoside triphosphate hydrolase|AAA+ ATPase domain|ABC transporter, conserved site	GO:0005524|GO:0016887|GO:0016020|GO:0000166|GO:0017111	NULL	NULL
Dr12763	GO:0016192|GO:0000786|GO:0016021|GO:0009536|GO:0003677|GO:0006334|GO:0046982|GO:0005634	NULL	histone h3	IPR000164|IPR007125|IPR009072	Histone H3|Histone core|Histone-fold	GO:0000786|GO:0003677|GO:0006334|GO:0046982	NULL	NULL
Dr12764	GO:0000786|GO:0003677|GO:0006334|GO:0005634|GO:0046982|GO:0009536	NULL	histone h3	IPR000164|IPR007125|IPR009072	Histone H3|Histone core|Histone-fold	GO:0000786|GO:0003677|GO:0006334|GO:0046982	NULL	NULL
Dr12771	NULL	NULL	NULL	IPR001611|IPR013210|IPR003591	Leucine-rich repeat|Leucine-rich repeat-containing N-terminal, type 2|Leucine-rich repeat, typical subtype	GO:0005515	NULL	NULL
Dr12793	GO:0046686|GO:0006807|GO:0016810|GO:0009536	NULL	nitrilase homolog 1-like	IPR003010	Carbon-nitrogen hydrolase	GO:0006807|GO:0016810	NULL	NULL
Dr24353	NULL	NULL	NULL	NULL	NULL	NULL	NULL	NULL
Dr24355	NULL	NULL	NULL	IPR013210|IPR003591	Leucine-rich repeat-containing N-terminal, type 2|Leucine-rich repeat, typical subtype	NULL	NULL	NULL
Dr12845	GO:0072488|GO:0003723|GO:0048544|GO:0000178|GO:0016021|GO:0008519	NULL	exosome complex component csl4	IPR019495	Exosome complex component CSL4	GO:0000178|GO:0003723	NULL	NULL
Dr12880	GO:0044260|GO:0090304|GO:0016740|GO:0043412|GO:0032259|GO:0040029	NULL	dna (cytosine-5)-methyltransferase	IPR001525	C-5 cytosine methyltransferase	GO:0003677|GO:0006306|GO:0008168	EC:2.1.1.37	KEGG: 00270+2.1.1.37
Dr12956	NULL	NULL	NULL	IPR001480	Bulb-type lectin domain	NULL	NULL	NULL
Dr12867	NULL	NULL	NULL	IPR001563	Peptidase S10, serine carboxypeptidase	GO:0004185|GO:0006508	NULL	NULL
Dr12876	NULL	NULL	NULL	NULL	NULL	NULL	NULL	NULL
Dr12877	GO:0006396|GO:0003676|GO:0005634	NULL	protein	IPR022783	GC-rich sequence DNA-binding factor domain	GO:0003677|GO:0005634|GO:0006355	NULL	NULL
Dr12911	NULL	NULL	NULL	IPR004333	Transcription factor, SBP-box	GO:0003677|GO:0005634	NULL	NULL
Dr12954	NULL	NULL	NULL	NULL	NULL	NULL	NULL	NULL
Dr12976	NULL	NULL	NULL	NULL	NULL	NULL	NULL	NULL
Dr12868	NULL	NULL	NULL	IPR001563|IPR018202	Peptidase S10, serine carboxypeptidase|Peptidase S10, serine carboxypeptidase, active site	GO:0004185|GO:0006508	NULL	NULL
Dr12871	GO:0016023|GO:0004185|GO:0006508	EC:3.4.16.0	serine carboxypeptidase ii-3	IPR001563	Peptidase S10, serine carboxypeptidase	GO:0004185|GO:0006508	NULL	NULL
Dr12872	NULL	NULL	NULL	NULL	NULL	NULL	NULL	NULL
Dr12999	NULL	NULL	NULL	IPR006887	Domain of unknown function DUF625	NULL	NULL	NULL
Dr13000	NULL	NULL	NULL	IPR018872	Zn-cluster domain	NULL	NULL	NULL
Dr12998	GO:0004553|GO:0006073|GO:0048046|GO:0005618|GO:0016762	EC:3.2.1.0|EC:2.4.1.207	probable xyloglucan endotransglucosylase hydrolase protein 23	IPR000757|IPR010713|IPR008985|IPR013320|IPR016455|IPR008263	Glycoside hydrolase, family 16|Xyloglucan endo-transglycosylase, C-terminal|Concanavalin A-like lectin/glucanases superfamily|Concanavalin A-like lectin/glucanase, subgroup|Xyloglucan endotransglucosylase/hydrolase|Glycoside hydrolase, family 16, active site	GO:0004553|GO:0005975|GO:0005618|GO:0006073|GO:0016762|GO:0048046	NULL	NULL
Dr13013	GO:0016799|GO:0016829|GO:0005634|GO:0005829|GO:0009691|GO:0005739	EC:3.2.2.0	cytokinin riboside 5 -monophosphate phosphoribohydrolase log3-like	IPR005269	Cytokinin riboside 5'-monophosphate phosphoribohydrolase LOG	NULL	NULL	NULL
Dr13014	NULL	NULL	NULL	NULL	NULL	NULL	NULL	NULL
Dr13018	NULL	NULL	NULL	IPR003441	NAC domain	GO:0003677|GO:0006355	NULL	NULL
Dr13020	GO:0030170|GO:0016023|GO:0016049|GO:0004758|GO:0016021|GO:0006687|GO:0017059|GO:0042967	EC:2.3.1.50	classes i and ii family expressed	IPR004839|IPR015424|IPR015421|IPR015422	Aminotransferase, class I/classII|Pyridoxal phosphate-dependent transferase|Pyridoxal phosphate-dependent transferase, major region, subdomain 1|Pyridoxal phosphate-dependent transferase, major region, subdomain 2	GO:0009058|GO:0030170|GO:0003824	NULL	NULL
Dr13040	GO:0005524|GO:0006950	NULL	heat shock cognate 70 kda expressed	IPR013126|IPR018181	Heat shock protein 70 family|Heat shock protein 70, conserved site	NULL	NULL	NULL
Dr13062	GO:0010038|GO:0071944|GO:0016740|GO:0004807|GO:0006096|GO:0009507|GO:0006000|GO:0006013|GO:0006020|GO:0006094|GO:0015976|GO:0046486	EC:5.3.1.1	triosephosphate isomerase	IPR000652|IPR013785|IPR020861	Triosephosphate isomerase|Aldolase-type TIM barrel|Triosephosphate isomerase, active site	GO:0004807|GO:0008152|GO:0003824	EC:5.3.1.1	KEGG: 00010+5.3.1.1|KEGG: 00051+5.3.1.1|KEGG: 00562+5.3.1.1|KEGG: 00710+5.3.1.1|MetaCyc: PWY-1042|MetaCyc: PWY-5484|MetaCyc: PWY-6142|MetaCyc: PWY-7003|UniPathway: UPA00109|UniPathway: UPA00138
Dr13071	GO:0044710|GO:0046872|GO:0016491	NULL	laccase [Liriodendron tulipifera]	IPR001117|IPR011706|IPR011707|IPR008972|IPR017761	Multicopper oxidase, type 1|Multicopper oxidase, type 2|Multicopper oxidase, type 3|Cupredoxin|Laccase	GO:0016491|GO:0055114|GO:0005507|GO:0046274|GO:0048046|GO:0052716	NULL	NULL
Dr13030	GO:0006470|GO:0009910|GO:0046872|GO:0008287|GO:0004722|GO:0005737|GO:0005634	NULL	serine threonine protein phosphatase	IPR006186	Serine/threonine-specific protein phosphatase/bis(5-nucleosyl)-tetraphosphatase	GO:0016787	NULL	NULL
Dr13054	GO:0071704|GO:0004672|GO:0044464|GO:0016310|GO:0007165|GO:0044238|GO:0005488	NULL	wall-associated receptor kinase 2-like	IPR000719|IPR011009|IPR013320|IPR002290|IPR017441|IPR008271	Protein kinase domain|Protein kinase-like domain|Concanavalin A-like lectin/glucanase, subgroup|Serine/threonine- / dual specificity protein kinase, catalytic domain|Protein kinase, ATP binding site|Serine/threonine-protein kinase, active site	GO:0004672|GO:0005524|GO:0006468|GO:0016772|GO:0004674	NULL	NULL
Dr13056	GO:0071944|GO:0016020|GO:0000166|GO:0051707|GO:0043167|GO:0006468|GO:0048856|GO:0004674|GO:0000165|GO:0044767|GO:0009069	EC:2.7.11.0	wall-associated receptor kinase 2-like	IPR000719|IPR011009|IPR002290|IPR017441|IPR008271	Protein kinase domain|Protein kinase-like domain|Serine/threonine- / dual specificity protein kinase, catalytic domain|Protein kinase, ATP binding site|Serine/threonine-protein kinase, active site	GO:0004672|GO:0005524|GO:0006468|GO:0016772|GO:0004674	NULL	NULL
Dr13087	NULL	NULL	NULL	NULL	NULL	NULL	NULL	NULL
Dr13095	GO:0005730|GO:0022626|GO:0009409|GO:0003735|GO:0005886|GO:0009507|GO:0005739|GO:0006414|GO:0042254	NULL	60s acidic ribosomal protein	IPR001813|IPR027534	Ribosomal protein L10/L12|Ribosomal protein L12 family	GO:0003735|GO:0005622|GO:0005840|GO:0006414	NULL	NULL
Dr13101	NULL	NULL	NULL	IPR002885	Pentatricopeptide repeat	NULL	NULL	NULL
Dr13108	GO:0003676|GO:0016023|GO:0005634|GO:0008270|GO:0009860	NULL	transparent testa 1	IPR013087|IPR007087	Zinc finger C2H2-type/integrase DNA-binding domain|Zinc finger, C2H2	GO:0003676|GO:0046872	NULL	NULL
Dr24431	GO:0016023	NULL	qltg3-1	IPR027923|IPR016140	Hydrophobic seed protein|Bifunctional inhibitor/plant lipid transfer protein/seed storage helical domain	NULL	NULL	NULL
Dr13123	NULL	NULL	NULL	NULL	NULL	NULL	NULL	NULL
Dr13142	NULL	NULL	NULL	NULL	NULL	NULL	NULL	NULL
Dr13143	NULL	NULL	NULL	NULL	NULL	NULL	NULL	NULL
Dr13158	GO:0035251	NULL	protein	IPR002213	UDP-glucuronosyl/UDP-glucosyltransferase	GO:0008152|GO:0016758	NULL	NULL
Dr13223	NULL	NULL	NULL	NULL	NULL	NULL	NULL	NULL
Dr13136	GO:0050275|GO:0042802|GO:0009805|GO:0009809|GO:0009811	EC:2.4.1.128	udp-	IPR002213	UDP-glucuronosyl/UDP-glucosyltransferase	GO:0008152|GO:0016758	NULL	NULL
Dr13139	GO:0005739|GO:0009536	NULL	transposon en spm sub-class	IPR024752	Myb/SANT-like domain	NULL	NULL	NULL
Dr24438	NULL	NULL	NULL	NULL	NULL	NULL	NULL	NULL
Dr24443	NULL	NULL	NULL	IPR001107|IPR004130|IPR019160|IPR027417	Band 7 protein|Uncharacterised protein family, ATP binding|Exocyst complex, component 1/SEC3|P-loop containing nucleoside triphosphate hydrolase	GO:0000166	NULL	NULL
Dr13239	GO:0005509	NULL	uncharacterized protein loc100255025	IPR002048|IPR011992|IPR014720|IPR018247	EF-hand domain|EF-hand domain pair|Double-stranded RNA-binding domain|EF-Hand 1, calcium-binding site	GO:0005509	NULL	NULL
Dr13299	GO:0016020|GO:0008375	NULL	core-2 i-branching beta- -n-acetylglucosaminyltransferase family protein	IPR003406	Glycosyl transferase, family 14	GO:0008375|GO:0016020	NULL	NULL
Dr13350	GO:0006468|GO:0005524|GO:0004674|GO:0009069	EC:2.7.11.0	protein	IPR000719|IPR011009	Protein kinase domain|Protein kinase-like domain	GO:0004672|GO:0005524|GO:0006468|GO:0016772	NULL	NULL
Dr13320	NULL	NULL	NULL	IPR003819|IPR024964|IPR006595|IPR013144|IPR006594	Taurine catabolism dioxygenase TauD/TfdA|CTLH/CRA C-terminal to LisH motif domain|CTLH, C-terminal LisH motif|CRA domain|LisH dimerisation motif	GO:0016491|GO:0055114|GO:0005515	NULL	Reactome: REACT_13
Dr13389	GO:0003735|GO:0003723|GO:0015935|GO:0006412|GO:0042254	NULL	40s ribosomal protein s5	IPR000235|IPR023798	Ribosomal protein S5/S7|Ribosomal protein S7 domain	GO:0006412	NULL	NULL
Dr13386	NULL	NULL	NULL	IPR005162|IPR002004|IPR015943|IPR019775	Retrotransposon gag domain|Polyadenylate-binding protein/Hyperplastic disc protein|WD40/YVTN repeat-like-containing domain|WD40 repeat, conserved site	GO:0003723|GO:0005515	NULL	NULL
Dr13458	GO:0008236|GO:0043170|GO:0044238	NULL	protease 2-like	IPR002470|IPR023302	Peptidase S9A, prolyl oligopeptidase|Peptidase S9A, N-terminal domain	GO:0004252|GO:0006508|GO:0070008	NULL	NULL
Dr13413	GO:0016799|GO:0016829|GO:0005634|GO:0005829|GO:0009691|GO:0005739	EC:3.2.2.0	protein	IPR005269	Cytokinin riboside 5'-monophosphate phosphoribohydrolase LOG	NULL	NULL	NULL
Dr13395	GO:0005739	NULL	protein sco1 homolog mitochondrial-like	IPR003782|IPR012336	Copper chaperone SCO1/SenC|Thioredoxin-like fold	NULL	NULL	NULL
Dr13396	GO:0005794|GO:0008378|GO:0006486|GO:0016021	NULL	galactosyltransferase family protein	IPR002659	Glycosyl transferase, family 31	GO:0006486|GO:0008378|GO:0016020	NULL	UniPathway: UPA00378
Dr24501	GO:0044765|GO:0050896|GO:0071705|GO:0016020|GO:0005215	NULL	nitrate chlorate transporter	IPR000109|IPR016196	Proton-dependent oligopeptide transporter family|Major facilitator superfamily domain, general substrate transporter	GO:0005215|GO:0006810|GO:0016020	NULL	Reactome: REACT_15518|Reactome: REACT_19419
Dr24503	NULL	NULL	NULL	NULL	NULL	NULL	NULL	NULL
Dr13495	GO:0004519|GO:0003676	NULL	protein	NULL	NULL	NULL	NULL	NULL
Dr13520	NULL	NULL	NULL	NULL	NULL	NULL	NULL	NULL
Dr13568	GO:0008233|GO:0016491|GO:0043231|GO:0044444|GO:0008152	NULL	cysteine proteinase	IPR013128|IPR000668|IPR013201|IPR025660	Peptidase C1A, papain|Peptidase C1A, papain C-terminal|Proteinase inhibitor I29, cathepsin propeptide|Cysteine peptidase, histidine active site	GO:0008234|GO:0006508	NULL	NULL
Dr13572	GO:0008233|GO:0016491|GO:0043231|GO:0044444|GO:0008152	NULL	cysteine proteinase rd21a-like	IPR013128|IPR000668|IPR013201|IPR000169|IPR025661	Peptidase C1A, papain|Peptidase C1A, papain C-terminal|Proteinase inhibitor I29, cathepsin propeptide|Cysteine peptidase, cysteine active site|Cysteine peptidase, asparagine active site	GO:0008234|GO:0006508	NULL	NULL
Dr13573	GO:0016787	NULL	cysteine proteinase rd21a	IPR013128|IPR000668	Peptidase C1A, papain|Peptidase C1A, papain C-terminal	GO:0008234|GO:0006508	NULL	NULL
Dr13574	GO:0016787	NULL	cysteine protease component of protease-inhibitor complex	IPR013128|IPR000668|IPR013201|IPR025660|IPR025661	Peptidase C1A, papain|Peptidase C1A, papain C-terminal|Proteinase inhibitor I29, cathepsin propeptide|Cysteine peptidase, histidine active site|Cysteine peptidase, asparagine active site	GO:0008234|GO:0006508	NULL	NULL
Dr13552	GO:0005737|GO:0043231|GO:0016020	NULL	transmembrane 9 superfamily member 4-like	NULL	NULL	NULL	NULL	NULL
Dr13567	NULL	NULL	NULL	NULL	NULL	NULL	NULL	NULL
Dr13587	NULL	NULL	NULL	NULL	NULL	NULL	NULL	NULL
Dr13589	NULL	NULL	NULL	IPR026960	Reverse transcriptase zinc-binding domain	NULL	NULL	NULL
Dr13590	GO:0016740|GO:0008152	NULL	serine palmitoyltransferase	NULL	NULL	NULL	NULL	NULL
Dr13591	NULL	NULL	NULL	NULL	NULL	NULL	NULL	NULL
Dr02525	NULL	NULL	NULL	NULL	NULL	NULL	NULL	NULL
Dr02516	GO:0016787	NULL	subtilisin-like serine protease	IPR015500|IPR000209|IPR003137|IPR023827	Peptidase S8, subtilisin-related|Peptidase S8/S53 domain|Protease-associated domain, PA|Peptidase S8, subtilisin, Asp-active site	GO:0004252|GO:0006508	NULL	NULL
Dr02577	GO:0022626|GO:0003735|GO:0005618|GO:0016020|GO:0006412|GO:0042254	NULL	40s ribosomal protein s11	IPR000266|IPR012340	Ribosomal protein S17|Nucleic acid-binding, OB-fold	GO:0003735|GO:0005622|GO:0005840|GO:0006412	NULL	NULL
Dr02580	GO:0003995|GO:0005777|GO:0009620|GO:0003997|GO:0009611|GO:0009695|GO:0006635|GO:0009555|GO:0050660|GO:0002213|GO:0001676|GO:0046686|GO:0006118|GO:0006637	EC:1.3.99.3|EC:1.3.3.6	acyl- oxidase	IPR002655|IPR009075	Acyl-CoA oxidase, C-terminal|Acyl-CoA dehydrogenase/oxidase C-terminal	GO:0003997|GO:0005777|GO:0006635|GO:0055114|GO:0016627	EC:1.3.3.6	KEGG: 00071+1.3.3.6|KEGG: 00592+1.3.3.6|MetaCyc: PWY-5136|MetaCyc: PWY-6837|MetaCyc: PWY-6920|MetaCyc: PWY-7007|MetaCyc: PWY-735
Dr02599	GO:0003676|GO:0000166	NULL	protein	IPR028346	HAUS augmin-like complex subunit 2	GO:0031023|GO:0051225	NULL	NULL
Dr02585	NULL	NULL	NULL	NULL	NULL	NULL	NULL	NULL
Dr24518	GO:0006633|GO:0016491|GO:0031407|GO:0010181|GO:0042221|GO:0005739|GO:0055114	NULL	12-oxophytodienoate reductase	IPR001155|IPR013785	NADH:flavin oxidoreductase/NADH oxidase, N-terminal|Aldolase-type TIM barrel	GO:0010181|GO:0016491|GO:0055114|GO:0003824	NULL	NULL
Dr13610	NULL	NULL	NULL	IPR024586	DnaJ-like protein C11, C-terminal	NULL	NULL	NULL
Dr13617	NULL	NULL	NULL	NULL	NULL	NULL	NULL	NULL
Dr24547	NULL	NULL	NULL	NULL	NULL	NULL	NULL	NULL
Dr24548	GO:0003677|GO:0009536|GO:0005739|GO:0006281	NULL	pentatricopeptide repeat-containing protein	NULL	NULL	NULL	NULL	NULL
Dr13623	NULL	NULL	NULL	NULL	NULL	NULL	NULL	NULL
Dr13625	NULL	NULL	NULL	NULL	NULL	NULL	NULL	NULL
Dr13635	GO:0008535|GO:0017004|GO:0015886|GO:0015232|GO:0016020|GO:0005739	NULL	cytochrome c biogenesis ccmf	NULL	NULL	NULL	NULL	NULL
Dr13638	NULL	NULL	NULL	NULL	NULL	NULL	NULL	NULL
Dr13621	NULL	NULL	NULL	NULL	NULL	NULL	NULL	NULL
Dr13628	GO:0046872|GO:0004497|GO:0043231|GO:0016705|GO:0044710	NULL	flavonoid 3 -hydroxylase	IPR001128|IPR002401|IPR017972	Cytochrome P450|Cytochrome P450, E-class, group I|Cytochrome P450, conserved site	GO:0005506|GO:0016705|GO:0020037|GO:0055114	NULL	Reactome: REACT_13433
Dr13629	NULL	NULL	NULL	NULL	NULL	NULL	NULL	NULL
Dr13634	GO:0005829|GO:0006468|GO:0004674|GO:0005509|GO:0010359|GO:0010119|GO:0005524|GO:0009738|GO:0005886|GO:0009069	EC:2.7.11.0	cdpk protein	IPR000719|IPR002618|IPR011009	Protein kinase domain|UTP--glucose-1-phosphate uridylyltransferase|Protein kinase-like domain	GO:0004672|GO:0005524|GO:0006468|GO:0008152|GO:0016779|GO:0016772	NULL	NULL
Dr13637	GO:0005840|GO:0003735|GO:0006412|GO:0005739|GO:0042254	NULL	ribosomal protein l2	IPR002171|IPR012340	Ribosomal protein L2|Nucleic acid-binding, OB-fold	GO:0003735|GO:0005622|GO:0005840|GO:0006412	NULL	NULL
Dr24550	GO:0009507	NULL	uncharacterized protein loc100832742	NULL	NULL	NULL	NULL	NULL
Dr13644	GO:0016020|GO:0005739	NULL	cellulose synthase-like protein e6-like	IPR005150	Cellulose synthase	GO:0016020|GO:0016760|GO:0030244	NULL	NULL
Dr13660	GO:0003676|GO:0030529|GO:0000166	NULL	rnase h domain-containing protein	IPR000504|IPR012337|IPR009027|IPR012677|IPR011320|IPR002156	RNA recognition motif domain|Ribonuclease H-like domain|Ribosomal protein L9/RNase H1, N-terminal|Nucleotide-binding, alpha-beta plait|Ribonuclease H1, N-terminal|Ribonuclease H domain	GO:0003676|GO:0000166|GO:0004523	NULL	NULL
Dr13671	NULL	NULL	NULL	IPR001623	DnaJ domain	NULL	NULL	NULL
Dr13699	NULL	NULL	NULL	IPR002182|IPR027417	NB-ARC|P-loop containing nucleoside triphosphate hydrolase	GO:0043531	NULL	NULL
Dr13713	GO:0008152|GO:0016491	NULL	forever young oxidoreductase	IPR002198|IPR016040	Short-chain dehydrogenase/reductase SDR|NAD(P)-binding domain	GO:0008152|GO:0016491	NULL	NULL
Dr13649	GO:0010033|GO:1901700|GO:0005739	NULL	poly -specific ribonuclease parn-like	IPR006941|IPR012337	Ribonuclease CAF1|Ribonuclease H-like domain	GO:0005634|GO:0003676	NULL	NULL
Dr24567	GO:0051287|GO:0048038|GO:0005739|GO:0055114|GO:0003954|GO:0006118	EC:1.6.99.3	nadh dehydrogenase subunit 7	IPR001135	NADH-quinone oxidoreductase, subunit D	GO:0016651|GO:0048038|GO:0051287|GO:0055114	NULL	NULL
Dr24568	NULL	NULL	NULL	NULL	NULL	NULL	NULL	NULL
Dr24569	GO:0051287|GO:0070469|GO:0048038|GO:0008137|GO:0005739|GO:0006120|GO:0006744|GO:0006814|GO:0015992	EC:1.6.5.3	nadh dehydrogenase subunit 7	IPR001135	NADH-quinone oxidoreductase, subunit D	GO:0016651|GO:0048038|GO:0051287|GO:0055114	NULL	NULL
Dr13725	GO:0016740	NULL	cyanidin-3-o-glucoside 2-o-glucuronosyltransferase-like	IPR002213	UDP-glucuronosyl/UDP-glucosyltransferase	GO:0008152|GO:0016758	NULL	NULL
Dr13731	NULL	NULL	NULL	IPR001611|IPR025875	Leucine-rich repeat|Leucine rich repeat 4	GO:0005515	NULL	NULL
Dr13732	GO:0003824	NULL	serine threonine-protein kinase	IPR001611	Leucine-rich repeat	GO:0005515	NULL	NULL
Dr24588	GO:0004672|GO:0000166	NULL	serine threonine-protein kinase-like protein at3g51990-like	NULL	NULL	NULL	NULL	NULL
Dr24589	GO:0016772	NULL	serine threonine-protein kinase-like protein at3g51990-like	IPR000719|IPR011009	Protein kinase domain|Protein kinase-like domain	GO:0004672|GO:0005524|GO:0006468|GO:0016772	NULL	NULL
Dr13750	NULL	NULL	NULL	NULL	NULL	NULL	NULL	NULL
Dr13809	GO:0016298|GO:0044763|GO:0005739|GO:0052689|GO:0016043|GO:0009507|GO:0044237|GO:0006950|GO:0016042	EC:3.1.1.0	lipase class 3 family protein	IPR002921	Lipase, class 3	GO:0004806|GO:0006629	NULL	Reactome: REACT_14797|Reactome: REACT_604
Dr13736	NULL	NULL	NULL	NULL	NULL	NULL	NULL	NULL
Dr13780	NULL	NULL	NULL	IPR022690|IPR000211|IPR001191|IPR001301	Geminivirus AL1 replication-associated protein, catalytic domain|Geminivirus BL1 movement protein|Geminivirus AL1, replication-associated protein|Geminivirus AL1 replication-associated protein, CLV type	GO:0006260|GO:0003677|GO:0033644|GO:0046740|GO:0005198|GO:0019028	EC:2.7.7.-	KEGG: 00520+2.7.7.-
Dr13823	NULL	NULL	NULL	IPR004158	Protein of unknown function DUF247, plant	NULL	NULL	NULL
Dr13825	NULL	NULL	NULL	IPR004158	Protein of unknown function DUF247, plant	NULL	NULL	NULL
Dr24607	NULL	NULL	NULL	NULL	NULL	NULL	NULL	NULL
Dr13831	GO:0050896|GO:0043231|GO:0044444|GO:0016853|GO:0044237	NULL	enoyl- hydratase isomerase family protein	NULL	NULL	NULL	NULL	NULL
Dr13853	GO:0043090|GO:0005886|GO:0016021|GO:0009536|GO:0080167	NULL	lysine histidine transporter 1-like	IPR013057	Amino acid transporter, transmembrane	NULL	NULL	NULL
Dr13867	GO:0006468|GO:0004674|GO:0016023|GO:0000166|GO:0016020|GO:0000165|GO:0009069	EC:2.7.11.0	receptor-like kinase rhg4	IPR001179|IPR001245|IPR011009|IPR013320|IPR002290|IPR003591|IPR000719|IPR017441|IPR008271	Peptidyl-prolyl cis-trans isomerase, FKBP-type, domain|Serine-threonine/tyrosine-protein kinase catalytic domain|Protein kinase-like domain|Concanavalin A-like lectin/glucanase, subgroup|Serine/threonine- / dual specificity protein kinase, catalytic domain|Leucine-rich repeat, typical subtype|Protein kinase domain|Protein kinase, ATP binding site|Serine/threonine-protein kinase, active site	GO:0006457|GO:0004672|GO:0006468|GO:0016772|GO:0005524|GO:0004674	NULL	NULL
Dr13956	NULL	NULL	NULL	NULL	NULL	NULL	NULL	NULL
Dr13836	GO:0055085|GO:0060918|GO:0048364|GO:0016021|GO:0044459|GO:0048367|GO:0009733|GO:0005215|GO:0009630|GO:0005737	NULL	auxin efflux carrier component	IPR004776	Auxin efflux carrier	GO:0016021|GO:0055085	NULL	NULL
Dr24614	NULL	NULL	NULL	NULL	NULL	NULL	NULL	NULL
Dr24616	NULL	NULL	NULL	NULL	NULL	NULL	NULL	NULL
Dr24621	NULL	NULL	NULL	NULL	NULL	NULL	NULL	NULL
Dr13985	GO:0016023|GO:0005773|GO:0004185|GO:0006508	EC:3.4.16.0	serine carboxypeptidase-like protein	IPR001563|IPR018202	Peptidase S10, serine carboxypeptidase|Peptidase S10, serine carboxypeptidase, active site	GO:0004185|GO:0006508	NULL	NULL
Dr14001	NULL	NULL	NULL	NULL	NULL	NULL	NULL	NULL
Dr13972	NULL	NULL	NULL	IPR012552	DVL	NULL	NULL	NULL
Dr13978	GO:0008152|GO:0005634	NULL	skp1-like protein	IPR001232|IPR016073|IPR011333	SKP1 component|SKP1 component, POZ domain|BTB/POZ fold	GO:0006511	NULL	Reactome: REACT_6185|UniPathway: UPA00143
Dr13979	GO:0008152|GO:0005634	NULL	skp1-like protein	IPR001232|IPR016073|IPR011333	SKP1 component|SKP1 component, POZ domain|BTB/POZ fold	GO:0006511	NULL	Reactome: REACT_6185|UniPathway: UPA00143
Dr13998	NULL	NULL	NULL	NULL	NULL	NULL	NULL	NULL
Dr14145	GO:0016757	NULL	udp-rhamnose:rhamnosyltransferase 1	IPR002213	UDP-glucuronosyl/UDP-glucosyltransferase	GO:0008152|GO:0016758	NULL	NULL
Dr14146	NULL	NULL	NULL	IPR002213	UDP-glucuronosyl/UDP-glucosyltransferase	GO:0008152|GO:0016758	NULL	NULL
Dr14157	NULL	NULL	NULL	IPR010369	Protein of unknown function DUF966	NULL	NULL	NULL
Dr14027	GO:0003677|GO:0005622|GO:0008270	NULL	zinc finger protein constans-like 9-like	IPR010402|IPR000315	CCT domain|Zinc finger, B-box	GO:0005515|GO:0005622|GO:0008270	NULL	NULL
Dr14045	GO:0016023	NULL	gdsl esterase lipase	IPR013831	SGNH hydrolase-type esterase domain	GO:0016787	NULL	NULL
Dr14046	GO:0016023	NULL	gdsl esterase lipase	IPR001087|IPR013831	Lipase, GDSL|SGNH hydrolase-type esterase domain	GO:0006629|GO:0016788|GO:0016787	NULL	NULL
Dr14047	NULL	NULL	NULL	IPR001087|IPR013831	Lipase, GDSL|SGNH hydrolase-type esterase domain	GO:0006629|GO:0016788|GO:0016787	NULL	NULL
Dr14031	NULL	NULL	NULL	NULL	NULL	NULL	NULL	NULL
Dr14033	GO:0016023	NULL	zinc finger	IPR013831	SGNH hydrolase-type esterase domain	GO:0016787	NULL	NULL
Dr14131	GO:0003676	NULL	ribonuclease p protein subunit p25	IPR002775	DNA/RNA-binding protein Alba-like	GO:0003676	NULL	NULL
Dr14034	NULL	NULL	NULL	IPR001461|IPR021109	Aspartic peptidase|Aspartic peptidase domain	GO:0004190|GO:0006508	NULL	NULL
Dr14111	GO:0015992|GO:0008553|GO:0009651|GO:0016021|GO:0046872|GO:0006754|GO:0006200|GO:0005886|GO:0005524|GO:0006119	EC:3.6.3.6	plasma membrane h+-atpase	IPR023214|IPR023299|IPR023298|IPR001757	HAD-like domain|Cation-transporting P-type ATPase|P-type ATPase, cytoplasmic domain N|P-type ATPase, transmembrane domain	GO:0006812|GO:0016021|GO:0019829	NULL	NULL
Dr14129	GO:0016021|GO:0016192|GO:0009507|GO:0005886	NULL	vesicle-associated membrane synaptobrevin 7b	IPR001388|IPR010908|IPR011012	Synaptobrevin|Longin domain|Longin-like domain	GO:0016021|GO:0016192|GO:0006810	NULL	NULL
Dr24651	NULL	NULL	NULL	NULL	NULL	NULL	NULL	NULL
Dr14203	GO:0016020|GO:0009536	NULL	uncharacterized protein chloroplastic-like	NULL	NULL	NULL	NULL	NULL
Dr14242	GO:0016491|GO:0005488	NULL	cytochrome p450	IPR001128	Cytochrome P450	GO:0005506|GO:0016705|GO:0020037|GO:0055114	NULL	Reactome: REACT_13433
Dr14245	GO:0005750|GO:0008121|GO:0006122|GO:0045153|GO:0006118|GO:0015992|GO:0045285	EC:1.10.2.2	protein	IPR003422|IPR023184	Cytochrome b-c1 complex, subunit 6|Ubiquinol-cytochrome C reductase hinge domain	GO:0006122|GO:0008121	NULL	NULL
Dr14184	GO:0047911|GO:0016023|GO:0019863|GO:0045490|GO:0005982|GO:0005985|GO:0019814	EC:3.2.1.67	polygalacturonase	IPR000743|IPR011050|IPR012334|IPR006626	Glycoside hydrolase, family 28|Pectin lyase fold/virulence factor|Pectin lyase fold|Parallel beta-helix repeat	GO:0004650|GO:0005975	NULL	NULL
Dr14250	GO:0016023|GO:0016020	NULL	auxin-induced protein 5ng4	IPR000620	Drug/metabolite transporter	GO:0016020	NULL	NULL
Dr14252	NULL	NULL	NULL	IPR000620	Drug/metabolite transporter	GO:0016020	NULL	NULL
Dr14280	NULL	NULL	NULL	IPR001480	Bulb-type lectin domain	NULL	NULL	NULL
Dr14190	GO:0006468|GO:0005524|GO:0009507|GO:0004674|GO:0009069	EC:2.7.11.0	serine threonine protein	IPR000719|IPR011009|IPR002290	Protein kinase domain|Protein kinase-like domain|Serine/threonine- / dual specificity protein kinase, catalytic domain	GO:0004672|GO:0005524|GO:0006468|GO:0016772	NULL	NULL
Dr14191	GO:0006468|GO:0005524|GO:0009507|GO:0004674|GO:0009069	EC:2.7.11.0	protein kinase g11a-like	IPR000719|IPR011009|IPR002290|IPR008271	Protein kinase domain|Protein kinase-like domain|Serine/threonine- / dual specificity protein kinase, catalytic domain|Serine/threonine-protein kinase, active site	GO:0004672|GO:0005524|GO:0006468|GO:0016772|GO:0004674	NULL	NULL
Dr14223	GO:0016787	NULL	ccr4-associated factor	IPR006941|IPR012337	Ribonuclease CAF1|Ribonuclease H-like domain	GO:0005634|GO:0003676	NULL	NULL
Dr14259	GO:0016491	NULL	protein	IPR002938|IPR003042	Monooxygenase, FAD-binding|Aromatic-ring hydroxylase-like	GO:0008152|GO:0016491	NULL	NULL
Dr14318	NULL	NULL	NULL	NULL	NULL	NULL	NULL	NULL
Dr14319	NULL	NULL	NULL	NULL	NULL	NULL	NULL	NULL
Dr14298	GO:0005488|GO:0016491|GO:0044710	NULL	cinnamyl alcohol dehydrogenase	IPR002085|IPR013149|IPR013154|IPR011032|IPR016040|IPR020843|IPR002328	Alcohol dehydrogenase superfamily, zinc-type|Alcohol dehydrogenase, C-terminal|Alcohol dehydrogenase GroES-like|GroES (chaperonin 10)-like|NAD(P)-binding domain|Polyketide synthase, enoylreductase|Alcohol dehydrogenase, zinc-type, conserved site	GO:0008270|GO:0016491|GO:0055114|GO:0016747	NULL	NULL
Dr14284	NULL	NULL	NULL	NULL	NULL	NULL	NULL	NULL
Dr02626	GO:0003824	NULL	probable lrr receptor-like serine threonine-protein kinase at1g63430-like	NULL	NULL	NULL	NULL	NULL
Dr02628	GO:0016023	NULL	serine threonine-protein kinase	IPR001611|IPR013210|IPR003591	Leucine-rich repeat|Leucine-rich repeat-containing N-terminal, type 2|Leucine-rich repeat, typical subtype	GO:0005515	NULL	NULL
Dr02634	NULL	NULL	NULL	NULL	NULL	NULL	NULL	NULL
Dr02660	GO:0080115|GO:0005525|GO:0030742|GO:0005777|GO:0016023|GO:0016787|GO:0007264|GO:0015031	NULL	ras-related protein rab-18	IPR001806|IPR027417|IPR020849|IPR003578|IPR003579|IPR002041|IPR005225	Small GTPase superfamily|P-loop containing nucleoside triphosphate hydrolase|Small GTPase superfamily, Ras type|Small GTPase superfamily, Rho type|Small GTPase superfamily, Rab type|Ran GTPase|Small GTP-binding protein domain	GO:0005525|GO:0007264|GO:0003924|GO:0006184|GO:0007165|GO:0016020|GO:0005622|GO:0015031|GO:0006886|GO:0006913	NULL	Reactome: REACT_11044
Dr02745	NULL	NULL	NULL	IPR001611|IPR004045|IPR013210|IPR010987|IPR012336|IPR003591	Leucine-rich repeat|Glutathione S-transferase, N-terminal|Leucine-rich repeat-containing N-terminal, type 2|Glutathione S-transferase, C-terminal-like|Thioredoxin-like fold|Leucine-rich repeat, typical subtype	GO:0005515	NULL	NULL
Dr02747	NULL	NULL	NULL	IPR001611|IPR025875|IPR010987|IPR003591	Leucine-rich repeat|Leucine rich repeat 4|Glutathione S-transferase, C-terminal-like|Leucine-rich repeat, typical subtype	GO:0005515	NULL	NULL
Dr02748	GO:0005739|GO:0016740	NULL	glutathione transferase	IPR004045|IPR010987|IPR012336	Glutathione S-transferase, N-terminal|Glutathione S-transferase, C-terminal-like|Thioredoxin-like fold	GO:0005515	NULL	NULL
Dr02751	NULL	NULL	NULL	IPR001611|IPR025558	Leucine-rich repeat|Domain of unknown function DUF4283	GO:0005515	NULL	NULL
Dr02716	GO:0005739	NULL	pentatricopeptide repeat-containing protein	IPR002885	Pentatricopeptide repeat	NULL	NULL	NULL
Dr02736	NULL	NULL	NULL	IPR001611|IPR013210|IPR003591	Leucine-rich repeat|Leucine-rich repeat-containing N-terminal, type 2|Leucine-rich repeat, typical subtype	GO:0005515	NULL	NULL
Dr02698	NULL	NULL	NULL	IPR025875	Leucine rich repeat 4	NULL	NULL	NULL
Dr02703	NULL	NULL	NULL	NULL	NULL	NULL	NULL	NULL
Dr02710	GO:0016740|GO:0005739	NULL	kdel motif-containing protein 1	IPR008539|IPR006598	Protein of unknown function DUF821, CAP10-like|Lipopolysaccharide-modifying protein	NULL	NULL	NULL
Dr02694	NULL	NULL	NULL	IPR025558	Domain of unknown function DUF4283	NULL	NULL	NULL
Dr02738	GO:0030042|GO:0008270|GO:0003676|GO:0006355|GO:0010089|GO:0003779|GO:0015629|GO:0003700|GO:0005737|GO:0006950|GO:0005667|GO:0045449	NULL	actin depolymerizing	IPR002108	Actin-binding, cofilin/tropomyosin type	GO:0003779|GO:0005622	NULL	NULL
Dr02785	NULL	NULL	NULL	IPR002885	Pentatricopeptide repeat	NULL	NULL	NULL
Dr02789	GO:0016491	NULL	2-oxoglutarate-dependent dioxygenase	IPR005123|IPR026992|IPR027443|IPR002283	Oxoglutarate/iron-dependent dioxygenase|Non-haem dioxygenase N-terminal domain|Isopenicillin N synthase|Isopenicillin N synthase-like	GO:0016491|GO:0016706|GO:0055114|GO:0005506	NULL	NULL
Dr02839	NULL	NULL	NULL	IPR001611|IPR013210|IPR025875|IPR003591	Leucine-rich repeat|Leucine-rich repeat-containing N-terminal, type 2|Leucine rich repeat 4|Leucine-rich repeat, typical subtype	GO:0005515	NULL	NULL
Dr02869	GO:0016757	NULL	zeatin o-glucosyltransferase-like	IPR002213	UDP-glucuronosyl/UDP-glucosyltransferase	GO:0008152|GO:0016758	NULL	NULL
Dr02890	GO:0006629|GO:0016788	NULL	gdsl esterase lipase at5g33370-like	IPR001087|IPR013831	Lipase, GDSL|SGNH hydrolase-type esterase domain	GO:0006629|GO:0016788|GO:0016787	NULL	NULL
Dr02902	GO:0016740	NULL	receptor protein kinase-like protein	IPR000719|IPR013210|IPR025875|IPR011009|IPR003591	Protein kinase domain|Leucine-rich repeat-containing N-terminal, type 2|Leucine rich repeat 4|Protein kinase-like domain|Leucine-rich repeat, typical subtype	GO:0004672|GO:0005524|GO:0006468|GO:0016772	NULL	NULL
Dr02906	GO:0016310|GO:0004672|GO:0016020|GO:0005739|GO:0000166	NULL	protein	IPR000719|IPR001611|IPR013210|IPR011009|IPR013320|IPR017441|IPR008266	Protein kinase domain|Leucine-rich repeat|Leucine-rich repeat-containing N-terminal, type 2|Protein kinase-like domain|Concanavalin A-like lectin/glucanase, subgroup|Protein kinase, ATP binding site|Tyrosine-protein kinase, active site	GO:0004672|GO:0005524|GO:0006468|GO:0005515|GO:0016772|GO:0004713	NULL	NULL
Dr02797	GO:0008233	NULL	subtilisin-like protease sdd1-like	IPR015500|IPR000209	Peptidase S8, subtilisin-related|Peptidase S8/S53 domain	GO:0004252|GO:0006508	NULL	NULL
Dr02801	GO:0016023|GO:0008152|GO:0008236	NULL	subtilisin-like protease sdd1-like	IPR015500|IPR000209|IPR003137	Peptidase S8, subtilisin-related|Peptidase S8/S53 domain|Protease-associated domain, PA	GO:0004252|GO:0006508	NULL	NULL
Dr02821	NULL	NULL	NULL	NULL	NULL	NULL	NULL	NULL
Dr02827	GO:0008757|GO:0008171|GO:0008152	NULL	caffeic acid 3-o-methyltransferase	IPR001077	O-methyltransferase, family 2	GO:0008171	NULL	NULL
Dr02829	GO:0008168	EC:2.1.1.0	caffeic acid o-methyltransferase	IPR001077|IPR012967|IPR011991	O-methyltransferase, family 2|Plant methyltransferase dimerisation|Winged helix-turn-helix DNA-binding domain	GO:0008171|GO:0046983	NULL	NULL
Dr02831	GO:0008757|GO:0009699|GO:0008171	NULL	caffeic acid 3-o-methyltransferase	IPR001077|IPR012967|IPR011991	O-methyltransferase, family 2|Plant methyltransferase dimerisation|Winged helix-turn-helix DNA-binding domain	GO:0008171|GO:0046983	NULL	NULL
Dr02844	GO:0005488	NULL	lim domain protein 2b	IPR001781	Zinc finger, LIM-type	GO:0008270	NULL	NULL
Dr02883	GO:0016772	NULL	probable lrr receptor-like serine threonine-protein kinase at4g08850-like	IPR000719|IPR001611|IPR025875|IPR011009|IPR013320|IPR003591|IPR017441	Protein kinase domain|Leucine-rich repeat|Leucine rich repeat 4|Protein kinase-like domain|Concanavalin A-like lectin/glucanase, subgroup|Leucine-rich repeat, typical subtype|Protein kinase, ATP binding site	GO:0004672|GO:0005524|GO:0006468|GO:0005515|GO:0016772	NULL	NULL
Dr24674	NULL	NULL	NULL	NULL	NULL	NULL	NULL	NULL
Dr24675	NULL	NULL	NULL	NULL	NULL	NULL	NULL	NULL
Dr24676	NULL	NULL	NULL	NULL	NULL	NULL	NULL	NULL
Dr24677	NULL	NULL	NULL	NULL	NULL	NULL	NULL	NULL
Dr24678	NULL	NULL	NULL	NULL	NULL	NULL	NULL	NULL
Dr24680	NULL	NULL	NULL	NULL	NULL	NULL	NULL	NULL
Dr24681	NULL	NULL	NULL	NULL	NULL	NULL	NULL	NULL
Dr24691	NULL	NULL	NULL	NULL	NULL	NULL	NULL	NULL
Dr24692	NULL	NULL	NULL	NULL	NULL	NULL	NULL	NULL
Dr24700	NULL	NULL	NULL	NULL	NULL	NULL	NULL	NULL
Dr24698	NULL	NULL	NULL	NULL	NULL	NULL	NULL	NULL
Dr24702	NULL	NULL	NULL	NULL	NULL	NULL	NULL	NULL
Dr24701	NULL	NULL	NULL	NULL	NULL	NULL	NULL	NULL
Dr24703	NULL	NULL	NULL	NULL	NULL	NULL	NULL	NULL
Dr24704	NULL	NULL	NULL	NULL	NULL	NULL	NULL	NULL
Dr24705	NULL	NULL	NULL	NULL	NULL	NULL	NULL	NULL
Dr24706	NULL	NULL	NULL	NULL	NULL	NULL	NULL	NULL
Dr24707	NULL	NULL	NULL	NULL	NULL	NULL	NULL	NULL
Dr24708	NULL	NULL	NULL	NULL	NULL	NULL	NULL	NULL
Dr24709	NULL	NULL	NULL	NULL	NULL	NULL	NULL	NULL
Dr24712	NULL	NULL	NULL	NULL	NULL	NULL	NULL	NULL
Dr24716	NULL	NULL	NULL	NULL	NULL	NULL	NULL	NULL
Dr24717	NULL	NULL	NULL	NULL	NULL	NULL	NULL	NULL
Dr24718	NULL	NULL	NULL	NULL	NULL	NULL	NULL	NULL
Dr24719	NULL	NULL	NULL	NULL	NULL	NULL	NULL	NULL
Dr24720	NULL	NULL	NULL	NULL	NULL	NULL	NULL	NULL
Dr24721	NULL	NULL	NULL	NULL	NULL	NULL	NULL	NULL
Dr24722	NULL	NULL	NULL	NULL	NULL	NULL	NULL	NULL
Dr24723	NULL	NULL	NULL	NULL	NULL	NULL	NULL	NULL
Dr24724	NULL	NULL	NULL	NULL	NULL	NULL	NULL	NULL
Dr24725	NULL	NULL	NULL	NULL	NULL	NULL	NULL	NULL
Dr24729	NULL	NULL	NULL	NULL	NULL	NULL	NULL	NULL
Dr24732	NULL	NULL	NULL	NULL	NULL	NULL	NULL	NULL
Dr24734	NULL	NULL	NULL	NULL	NULL	NULL	NULL	NULL
Dr24735	NULL	NULL	NULL	NULL	NULL	NULL	NULL	NULL
Dr24737	NULL	NULL	NULL	NULL	NULL	NULL	NULL	NULL
Dr24738	NULL	NULL	NULL	NULL	NULL	NULL	NULL	NULL
Dr24740	NULL	NULL	NULL	NULL	NULL	NULL	NULL	NULL
Dr24741	NULL	NULL	NULL	NULL	NULL	NULL	NULL	NULL
Dr24742	NULL	NULL	NULL	NULL	NULL	NULL	NULL	NULL
Dr24745	NULL	NULL	NULL	NULL	NULL	NULL	NULL	NULL
Dr24746	NULL	NULL	NULL	IPR001878	Zinc finger, CCHC-type	GO:0003676|GO:0008270	NULL	NULL
Dr24747	GO:0006259|GO:0003676|GO:0003824	NULL	retrotransposon ty3-gypsy expressed	NULL	NULL	NULL	NULL	NULL
Dr24748	NULL	NULL	NULL	NULL	NULL	NULL	NULL	NULL
Dr24750	NULL	NULL	NULL	NULL	NULL	NULL	NULL	NULL
Dr24749	NULL	NULL	NULL	NULL	NULL	NULL	NULL	NULL
Dr24753	NULL	NULL	NULL	NULL	NULL	NULL	NULL	NULL
Dr24754	NULL	NULL	NULL	NULL	NULL	NULL	NULL	NULL
Dr24756	NULL	NULL	NULL	NULL	NULL	NULL	NULL	NULL
Dr24757	NULL	NULL	NULL	NULL	NULL	NULL	NULL	NULL
Dr24758	NULL	NULL	NULL	NULL	NULL	NULL	NULL	NULL
Dr24762	NULL	NULL	NULL	NULL	NULL	NULL	NULL	NULL
Dr24760	NULL	NULL	NULL	NULL	NULL	NULL	NULL	NULL
Dr24766	NULL	NULL	NULL	NULL	NULL	NULL	NULL	NULL
Dr24767	NULL	NULL	NULL	NULL	NULL	NULL	NULL	NULL
Dr24769	NULL	NULL	NULL	NULL	NULL	NULL	NULL	NULL
Dr24770	NULL	NULL	NULL	NULL	NULL	NULL	NULL	NULL
Dr24773	NULL	NULL	NULL	IPR007125|IPR009072	Histone core|Histone-fold	GO:0003677|GO:0046982	NULL	NULL
Dr24774	NULL	NULL	NULL	NULL	NULL	NULL	NULL	NULL
Dr24775	NULL	NULL	NULL	IPR001878	Zinc finger, CCHC-type	GO:0003676|GO:0008270	NULL	NULL
Dr24778	NULL	NULL	NULL	NULL	NULL	NULL	NULL	NULL
Dr24779	NULL	NULL	NULL	NULL	NULL	NULL	NULL	NULL
Dr24782	NULL	NULL	NULL	NULL	NULL	NULL	NULL	NULL
Dr24783	NULL	NULL	NULL	NULL	NULL	NULL	NULL	NULL
Dr24784	NULL	NULL	NULL	NULL	NULL	NULL	NULL	NULL
Dr24785	GO:0005488	NULL	gag-pol polyprotein	IPR001878	Zinc finger, CCHC-type	GO:0003676|GO:0008270	NULL	NULL
Dr24786	NULL	NULL	NULL	NULL	NULL	NULL	NULL	NULL
Dr24787	NULL	NULL	NULL	NULL	NULL	NULL	NULL	NULL
Dr24790	NULL	NULL	NULL	NULL	NULL	NULL	NULL	NULL
Dr03266	NULL	NULL	NULL	NULL	NULL	NULL	NULL	NULL
Dr24792	NULL	NULL	NULL	NULL	NULL	NULL	NULL	NULL
Dr24794	NULL	NULL	NULL	NULL	NULL	NULL	NULL	NULL
Dr24798	NULL	NULL	NULL	NULL	NULL	NULL	NULL	NULL
Dr24799	NULL	NULL	NULL	NULL	NULL	NULL	NULL	NULL
Dr24803	NULL	NULL	NULL	NULL	NULL	NULL	NULL	NULL
Dr24804	NULL	NULL	NULL	NULL	NULL	NULL	NULL	NULL
Dr24805	NULL	NULL	NULL	NULL	NULL	NULL	NULL	NULL
Dr24806	NULL	NULL	NULL	NULL	NULL	NULL	NULL	NULL
Dr24808	NULL	NULL	NULL	NULL	NULL	NULL	NULL	NULL
Dr24809	NULL	NULL	NULL	NULL	NULL	NULL	NULL	NULL
Dr15009	NULL	NULL	NULL	NULL	NULL	NULL	NULL	NULL
Dr15011	NULL	NULL	NULL	NULL	NULL	NULL	NULL	NULL
Dr24814	NULL	NULL	NULL	NULL	NULL	NULL	NULL	NULL
Dr24815	NULL	NULL	NULL	NULL	NULL	NULL	NULL	NULL
Dr24817	NULL	NULL	NULL	NULL	NULL	NULL	NULL	NULL
Dr24820	NULL	NULL	NULL	NULL	NULL	NULL	NULL	NULL
Dr24821	NULL	NULL	NULL	NULL	NULL	NULL	NULL	NULL
Dr24822	NULL	NULL	NULL	NULL	NULL	NULL	NULL	NULL
Dr24823	NULL	NULL	NULL	NULL	NULL	NULL	NULL	NULL
Dr24824	NULL	NULL	NULL	NULL	NULL	NULL	NULL	NULL
Dr24826	NULL	NULL	NULL	NULL	NULL	NULL	NULL	NULL
Dr24827	NULL	NULL	NULL	NULL	NULL	NULL	NULL	NULL
Dr24828	GO:0000325|GO:0005774|GO:0015700|GO:0071992|GO:0032440|GO:0046685|GO:0016021|GO:0071994|GO:0015446|GO:0008559|GO:0055114|GO:0006200|GO:0005886|GO:0005524|GO:0006812|GO:0006855	EC:1.3.1.74|EC:3.6.3.16|EC:3.6.3.44	abc transporter c family member 2	NULL	NULL	NULL	NULL	NULL
Dr24832	NULL	NULL	NULL	NULL	NULL	NULL	NULL	NULL
Dr24833	NULL	NULL	NULL	NULL	NULL	NULL	NULL	NULL
Dr24834	NULL	NULL	NULL	NULL	NULL	NULL	NULL	NULL
Dr24835	NULL	NULL	NULL	NULL	NULL	NULL	NULL	NULL
Dr24836	NULL	NULL	NULL	NULL	NULL	NULL	NULL	NULL
Dr15107	NULL	NULL	NULL	NULL	NULL	NULL	NULL	NULL
Dr24837	NULL	NULL	NULL	NULL	NULL	NULL	NULL	NULL
Dr24838	NULL	NULL	NULL	NULL	NULL	NULL	NULL	NULL
Dr24839	NULL	NULL	NULL	NULL	NULL	NULL	NULL	NULL
Dr24840	NULL	NULL	NULL	IPR004252	Probable transposase, Ptta/En/Spm, plant	NULL	NULL	NULL
Dr24841	NULL	NULL	NULL	NULL	NULL	NULL	NULL	NULL
Dr24844	NULL	NULL	NULL	NULL	NULL	NULL	NULL	NULL
Dr24845	NULL	NULL	NULL	NULL	NULL	NULL	NULL	NULL
Dr24847	NULL	NULL	NULL	NULL	NULL	NULL	NULL	NULL
Dr24846	NULL	NULL	NULL	NULL	NULL	NULL	NULL	NULL
Dr24848	NULL	NULL	NULL	NULL	NULL	NULL	NULL	NULL
Dr24849	NULL	NULL	NULL	NULL	NULL	NULL	NULL	NULL
Dr24851	NULL	NULL	NULL	NULL	NULL	NULL	NULL	NULL
Dr24852	NULL	NULL	NULL	NULL	NULL	NULL	NULL	NULL
Dr24853	NULL	NULL	NULL	NULL	NULL	NULL	NULL	NULL
Dr24855	NULL	NULL	NULL	NULL	NULL	NULL	NULL	NULL
Dr24850	NULL	NULL	NULL	NULL	NULL	NULL	NULL	NULL
Dr24854	NULL	NULL	NULL	NULL	NULL	NULL	NULL	NULL
Dr24856	NULL	NULL	NULL	NULL	NULL	NULL	NULL	NULL
Dr24857	NULL	NULL	NULL	NULL	NULL	NULL	NULL	NULL
Dr24858	NULL	NULL	NULL	NULL	NULL	NULL	NULL	NULL
Dr24860	NULL	NULL	NULL	NULL	NULL	NULL	NULL	NULL
Dr24861	NULL	NULL	NULL	NULL	NULL	NULL	NULL	NULL
Dr24863	NULL	NULL	NULL	NULL	NULL	NULL	NULL	NULL
Dr24865	NULL	NULL	NULL	NULL	NULL	NULL	NULL	NULL
Dr24864	NULL	NULL	NULL	NULL	NULL	NULL	NULL	NULL
Dr24866	NULL	NULL	NULL	NULL	NULL	NULL	NULL	NULL
[truncated: 9,350 more rows]
