# Supplementary material for: Genome sequencing of the staple food crop white Guinea yam enables the development of a molecular marker for sex determination
Source: BMC Biol. 2017 Sep 19;15:86. doi: 10.1186/s12915-017-0419-x (PMC5604175; doi:10.1186/s12915-017-0419-x)
Supplement: Supplementary file 9 — Non-redundant Gene Ontology terms for 2795 genes significantly (after FDR correction) enriched in D. rotundata with orthologous genes identified in A. thaliana, B. distachyon, O. sativa, E. guineensis, P. dactylifera, and M. acuminata. (XLSX 35 kb) [file 12915_2017_419_MOESM9_ESM.xlsx]

## Sheet: Supplementary dataset 7
Additional file 9: Supplementary dataset 7. Non-redundant gene ontology terms for 2,795 genes significantly (after FDR correction) enriched in D. rotundata with orthologous genes identified in A. thaliana, B. distachyon, O. sativa, E. guineensis, P. dactylifera and M.acuminata.
term_ID	description	log10 p-value
GO:0001071	nucleic acid binding transcription factor activity	-6.6144
GO:0003674	molecular_function	-6.6144
GO:0003700	sequence-specific DNA binding transcription factor activity	-6.6144
GO:0003824	catalytic activity	-6.6144
GO:0005488	binding	-6.6144
GO:0016788	hydrolase activity, acting on ester bonds	-6.6144
GO:0019825	oxygen binding	-6.6144
GO:0016787	hydrolase activity	-6.6144
GO:0097159	organic cyclic compound binding	-6.6144
GO:0003676	nucleic acid binding	-6.6144
GO:1901363	heterocyclic compound binding	-6.6144
GO:0003723	RNA binding	-6.6144
GO:0004518	nuclease activity	-6.6144
GO:0005575	cellular_component	-6.6144
GO:0009536	plastid	-6.6144
GO:0043226	organelle	-6.6144
GO:0044464	cell part	-6.6144
GO:0009579	thylakoid	-6.6144
GO:0044424	intracellular part	-6.6144
GO:0005622	intracellular	-6.6144
GO:0044444	cytoplasmic part	-6.6144
GO:0005777	peroxisome	-6.6144
GO:0042579	microbody	-6.6144
GO:0043227	membrane-bounded organelle	-6.6144
GO:0000003	reproduction	-6.6144
GO:0008150	biological_process	-6.6144
GO:0009987	cellular process	-6.6144
GO:0015979	photosynthesis	-6.6144
GO:0016043	cellular component organization	-6.6144
GO:0032501	multicellular organismal process	-6.6144
GO:0044699	single-organism process	-6.6144
GO:0044767	single-organism developmental process	-6.6144
GO:0071840	cellular component organization or biogenesis	-6.6144
GO:0044238	primary metabolic process	-6.6144
GO:0009056	catabolic process	-6.6144
GO:0006807	nitrogen compound metabolic process	-6.6144
GO:0071704	organic substance metabolic process	-6.6144
GO:1901360	organic cyclic compound metabolic process	-6.6144
GO:0007049	cell cycle	-6.6144
GO:0044707	single-multicellular organism process	-6.6144
GO:0044260	cellular macromolecule metabolic process	-6.6144
GO:0044237	cellular metabolic process	-6.6144
GO:0006629	lipid metabolic process	-6.6144
GO:0043170	macromolecule metabolic process	-6.6144
GO:0046483	heterocycle metabolic process	-6.6144
GO:0006725	cellular aromatic compound metabolic process	-6.6144
GO:0090304	nucleic acid metabolic process	-6.6144
GO:0019538	protein metabolic process	-6.6144
GO:0006259	DNA metabolic process	-6.6144
GO:0008152	metabolic process	-6.6073
GO:0032502	developmental process	-6.426
GO:0009058	biosynthetic process	-6.007
GO:0006810	transport	-5.6345
GO:0051179	localization	-5.6345
GO:0005829	cytosol	-4.2076
GO:0043603	cellular amide metabolic process	-4.1273
GO:0006412	translation	-4.1273
GO:0006091	generation of precursor metabolites and energy	-4.1273
GO:0006518	peptide metabolic process	-4.1273
GO:1901564	organonitrogen compound metabolic process	-4.1273
GO:0044249	cellular biosynthetic process	-4.1273
GO:1901566	organonitrogen compound biosynthetic process	-4.1273
GO:0016740	transferase activity	-3.9173
GO:0036094	small molecule binding	-3.844
GO:0000166	nucleotide binding	-3.844
GO:1901265	nucleoside phosphate binding	-3.844
GO:0044267	cellular protein metabolic process	-3.633
GO:0003774	motor activity	-2.8082
GO:0016817	hydrolase activity, acting on acid anhydrides	-2.8082
GO:0019748	secondary metabolic process	-2.6951
GO:0005975	carbohydrate metabolic process	-2.6511
GO:0044710	single-organism metabolic process	-2.5812
GO:0005215	transporter activity	-2.4349
GO:0016020	membrane	-1.9399
GO:0008135	translation factor activity, nucleic acid binding	-1.413
GO:0040029	regulation of gene expression, epigenetic	-1.2464
GO:0008219	cell death	-0.7823
GO:0007154	cell communication	-0.7244
GO:0009719	response to endogenous stimulus	-0.7089
GO:0005737	cytoplasm	-0.6889
GO:0005623	cell	-0.6391
GO:0030312	external encapsulating structure	-0.589
GO:0005618	cell wall	-0.5201
GO:0043412	macromolecule modification	-0.4177
GO:0031975	envelope	-0.3499
GO:0005635	nuclear envelope	-0.3499
GO:0003682	chromatin binding	-0.0462
