# Supplementary material for: Genome sequencing of the staple food crop white Guinea yam enables the development of a molecular marker for sex determination
Source: BMC Biol. 2017 Sep 19;15:86. doi: 10.1186/s12915-017-0419-x (PMC5604175; doi:10.1186/s12915-017-0419-x)
Supplement: Supplementary file 10 — Non-redundant Gene Ontology terms for 11,348 genes significantly (after FDR correction) enriched in D. rotundata with no orthologous genes identfied in A. thaliana, B. distachyon, O. sativa, E. guineensis, P. dactylifera, and M. acuminata. (XLSX 9 kb) [file 12915_2017_419_MOESM10_ESM.xlsx]

## Sheet: Supplementary dataset 8
Additional file 10: Supplementary dataset 8. Non-redundant gene ontology terms for 11,348 genes significantly (after FDR correction) enriched in D. rotundata with no orthologous genes identfied in A. thaliana, B. distachyon, O. sativa, E. guineensis, P. dactylifera and M.acuminata.
term_ID	description	plot_X	plot_Y	plot_size	log10 p-value
GO:0005575	cellular_component	4.092	-3.242	4.218	-3.9145
GO:0044424	intracellular part	-5.716	-2.652	4.021	-3.9145
GO:0044444	cytoplasmic part	-3.456	4.998	3.73	-3.9145
GO:0044464	cell part	-5.417	-3.732	4.064	-3.9145
GO:0003674	molecular_function	-2.327	7.657	4.587	-3.9145
GO:0005488	binding	-1.406	6.297	4.402	-3.9145
GO:0043226	organelle	5.632	1.25	3.947	-3.2246
GO:0043229	intracellular organelle	-6.242	0.516	3.947	-3.2246
GO:0008150	biological_process	1.432	4.273	4.55	-2.675
GO:0005515	protein binding	3.446	3.689	3.368	-2.4422
GO:0003824	catalytic activity	6.071	-3.474	4.347	-1.6261
GO:0043167	ion binding	-3.104	1.233	4.213	-0.6668
GO:0016740	transferase activity	5.295	0.612	3.934	-0.1605
GO:0097159	organic cyclic compound binding	-4.532	3.683	4.278	-0.1395
GO:1901363	heterocyclic compound binding	-3.592	-1.669	4.278	-0.1395
