# Supplementary material for: Genome sequencing of the staple food crop white Guinea yam enables the development of a molecular marker for sex determination
Source: BMC Biol. 2017 Sep 19;15:86. doi: 10.1186/s12915-017-0419-x (PMC5604175; doi:10.1186/s12915-017-0419-x)
Supplement: Supplementary file 11 — Top 50 highest expressed genes observed to be enriched in tuber. (XLSX 59 kb) [file 12915_2017_419_MOESM11_ESM.xlsx]

## Sheet: Sheet1
Additional file 11: Supplemental dataset S9. Top 50 highest expressed genes observed to be enriched in tuber (padj < 0.05).
Gene name	log2FoldChange	pvalue	padj	Interpro Description
Dr17256	5.10488	2.8293e-05	0.000281719	Cytochrome P450|Cytochrome P450, E-class, group I|Cytochrome P450, conserved site
Dr24140	5.46778	8.60377e-07	1.38644e-05	Transposase, MuDR, plant|Zinc finger, SWIM-type|MULE transposase domain|Zinc finger, PMZ-type
Dr15196	6.75144	2.65083e-16	3.73684e-14	Probable transposase, Ptta/En/Spm, plant
Dr13213	5.29788	6.54892e-08	1.46374e-06	DnaJ domain|DnaJ domain, conserved site
Dr11460	5.47944	8.14254e-09	2.33615e-07	Oxoglutarate/iron-dependent dioxygenase|Non-haem dioxygenase N-terminal domain|Isopenicillin N synthase-like
Dr19009	5.06658	6.39146e-05	0.000549598	Myc-type, basic helix-loop-helix (bHLH) domain|Transcription factor MYC/MYB N-terminal
Dr04692	5.12749	0.00119559	0.00647645	Glycoside hydrolase, family 18, catalytic domain|Glycoside hydrolase, superfamily|Glycoside hydrolase, catalytic domain|Glycoside hydrolase, chitinase active site
Dr24198	5.51029	0.000158958	0.00119372	Glycoside hydrolase, family 18, catalytic domain|Glycoside hydrolase, superfamily|Glycoside hydrolase, catalytic domain|Glycoside hydrolase, chitinase active site
Dr01881	5.72357	4.15324e-07	7.32567e-06	SANT/Myb domain|AWPM-19-like|Homeodomain-like|Myb domain
Dr10787	5.05137	0.000357752	0.00236341	Major intrinsic protein|Aquaporin-like|Major intrinsic protein, conserved site
Dr08902	6.36437	1.48375e-14	1.39809e-12
Dr15474	5.42352	2.33775e-07	4.40093e-06	Terpene synthase, N-terminal domain|Terpene synthase, metal-binding domain|Terpenoid cyclases/protein prenyltransferase alpha-alpha toroid|Terpenoid synthase
Dr01919	7.4876	2.29302e-44	1.0263e-40	Domain of unknown function DUF640
Dr02868	5.13487	3.59161e-06	4.69691e-05	UDP-glucuronosyl/UDP-glucosyltransferase
Dr14344	5.74539	1.96694e-15	2.33206e-13	Starch synthase, catalytic domain
Dr19425	6.47071	3.96011e-14	3.47538e-12	Alpha crystallin/Hsp20 domain|HSP20-like chaperone
Dr04510	7.31308	8.31161e-35	1.65336e-31
Dr02722	5.41386	4.72377e-06	5.97665e-05	Leucine-rich repeat|Leucine-rich repeat-containing N-terminal, type 2|Leucine-rich repeat, typical subtype
Dr05218	4.93729	2.02257e-05	0.000210524
Dr11281	5.60383	8.79969e-05	0.000722665	Haem peroxidase, plant/fungal/bacterial|Plant peroxidase|Haem peroxidase|Peroxidases heam-ligand binding site|Peroxidase, active site
Dr01855	7.28824	2.56605e-07	4.78043e-06	Carbonic anhydrase, alpha-class|Alpha carbonic anhydrase
Dr00831	6.60276	5.67604e-08	1.28957e-06	Cytochrome P450|Cytochrome P450, E-class, group I|Cytochrome P450, conserved site
Dr08729	6.30397	2.06635e-11	1.05396e-09
Dr05434	4.98463	5.49583e-07	9.43354e-06
Dr15590	5.20202	6.22258e-05	0.000536881
Dr14834	5.04129	0.0015094	0.00787837
Dr17018	5.62281	1.00719e-19	2.77412e-17	Glycoside hydrolase, family 13|Glycosyl hydrolase, family 13, catalytic domain|Alpha-amylase, C-terminal all beta|Glycoside hydrolase, family 13, N-terminal|Glycoside hydrolase, superfamily|Immunoglobulin E-set|Immunoglobulin-like fold|Glycosyl hydrolase, family 13, all-beta|Glycoside hydrolase, catalytic domain|Glycosyl hydrolase, family 13, subfamily, catalytic domain|1,4-alpha-glucan-branching…
Dr06853	6.18538	1.23772e-07	2.53244e-06
Dr16306	8.88185	4.49129e-22	2.06173e-19	Phosphatidylethanolamine-binding protein PEBP
Dr07061	5.29384	1.12518e-16	1.73656e-14	Dienelactone hydrolase
Dr05500	5.21673	0.000296699	0.00200673
Dr00194	5.17414	2.67505e-12	1.64576e-10
Dr19408	9.2588	2.68862e-12	1.64844e-10	Bulb-type lectin domain
Dr17669	5.30261	9.07488e-05	0.000743219	Glycoside hydrolase, family 5|Glycoside hydrolase, superfamily|Glycoside hydrolase, catalytic domain
Dr14784	6.68314	2.87071e-23	1.65788e-20
Dr02895	5.33266	3.06229e-11	1.52289e-09	Biopterin transport-related protein BT1|Major facilitator superfamily domain, general substrate transporter
Dr08991	5.10023	6.35075e-05	0.000546622
Dr15578	5.353	4.96956e-08	1.148e-06	UDP-glucuronosyl/UDP-glucosyltransferase
Dr01858	11.0047	4.4478e-17	7.30541e-15	Carbonic anhydrase, alpha-class|Alpha carbonic anhydrase
Dr01856	9.17175	3.16706e-14	2.86363e-12	Carbonic anhydrase, alpha-class|Alpha carbonic anhydrase
Dr01640	6.00418	4.64946e-13	3.45391e-11	Ferredoxin--NADP reductase|Oxidoreductase FAD/NAD(P)-binding|Riboflavin synthase-like beta-barrel|Ferredoxin reductase-type FAD-binding domain
Dr01642	11.0592	1.42592e-14	1.36515e-12	Ferredoxin--NADP reductase|Oxidoreductase FAD/NAD(P)-binding|Riboflavin synthase-like beta-barrel|Ferredoxin reductase-type FAD-binding domain
Dr10113	5.92324	0.000635421	0.00380339	Bulb-type lectin domain
Dr15345	5.89462	7.62353e-05	0.000638671
Dr04333	5.31504	3.8674e-06	5.02089e-05	Haem peroxidase, plant/fungal/bacterial|Plant peroxidase|Haem peroxidase|Peroxidases heam-ligand binding site
Dr22133	5.29054	5.92504e-05	0.000514771	Zinc finger, double-stranded RNA binding|Zinc finger C2H2-type/integrase DNA-binding domain|Zinc finger, C2H2-like|Zinc finger, C2H2
Dr15854	5.98854	1.73609e-08	4.56406e-07
Dr24177	5.32825	1.92199e-17	3.40688e-15
Dr20590	5.46487	2.6309e-05	0.000264019
Dr13471	7.0916	2.49427e-12	1.55052e-10
