# Supplementary material for: Genome sequencing of the staple food crop white Guinea yam enables the development of a molecular marker for sex determination
Source: BMC Biol. 2017 Sep 19;15:86. doi: 10.1186/s12915-017-0419-x (PMC5604175; doi:10.1186/s12915-017-0419-x)
Supplement: Supplementary file 12 — List of genes predicted within the female-specific (W-linked) region on pseudo-chromosome 11 identified by QTL-seq. (XLSX 464 kb) [file 12915_2017_419_MOESM12_ESM.xlsx]

## Sheet:  Supplemental dataset S10
Additonal file 12: Supplemental dataset S10. List of genes predicted within the female specific (W-linked ) region on pseudo-chromosome 11 identified by QTL-seq
		mRNA_information				scaffold_fragment_information
Gene_ID	PC_name	mrna_start	mrna_end	mrna_strand	mrna_size	scaf_num_in_pc	scaf_no	scaf_stt_in_pc	scaf_end_in_pc	scaf_orientation	fragment_length	Interproscan_IPR_Description
Dr18978	P1_11_P2_9	691968	693285	+	1318	2	scaffold206	684747	1301443	Plus	616697
Dr18979	P1_11_P2_9	694572	695251	+	680	2	scaffold206	684747	1301443	Plus	616697	Peptidase C48, SUMO/Sentrin/Ubl1
Dr18980	P1_11_P2_9	698138	699905	-	1768	2	scaffold206	684747	1301443	Plus	616697
Dr18981	P1_11_P2_9	701021	710665	+	9645	2	scaffold206	684747	1301443	Plus	616697
Dr18982	P1_11_P2_9	747177	747771	-	595	2	scaffold206	684747	1301443	Plus	616697	Nucleoporin Nup186/Nup192/Nup205
Dr18983	P1_11_P2_9	754213	763142	+	8930	2	scaffold206	684747	1301443	Plus	616697
Dr18984	P1_11_P2_9	801569	802258	-	690	2	scaffold206	684747	1301443	Plus	616697	Exostosin-like
Dr18985	P1_11_P2_9	815813	827487	+	11675	2	scaffold206	684747	1301443	Plus	616697	Cation/H+ exchanger
Dr18986	P1_11_P2_9	835312	837808	+	2497	2	scaffold206	684747	1301443	Plus	616697	Cyclophilin-like peptidyl-prolyl cis-trans isomerase domain|Cyclophilin-type peptidyl-prolyl cis-trans isomerase, conserved site
Dr18987	P1_11_P2_9	844619	845248	+	630	2	scaffold206	684747	1301443	Plus	616697	Pentatricopeptide repeat
